# Supplementary material for: Trimming nano delivery at the cell side by tuning ARF6 GTPases to the GTP-bound form
Source: Research Square preprint supplement (doi:10.21203/rs.3.rs-1884888/v1), 2022-08-11
Supplement: Supplementary file 1 [file 1dbf75ab81f11a8f38f9351d.xlsx]

## Sheet: Table3
LFQ Proteomics identification (Search Result) of total cellular proteins of Hela cells after transfected with ARF6GTP plasmids
Protein IDs	Majority protein IDs	Peptide counts (all)	Peptide counts (razor+unique)	Peptide counts (unique)	LFQ intensity Q67L-1	LFQ intensity Q67L-2	LFQ intensity Q67L-3	Protein names	Gene names	Fasta headers	Number of proteins	Peptides	Razor + unique peptides	Unique peptides	Peptides Q67L-1	Peptides Q67L-2	Peptides Q67L-3	Razor + unique peptides Q67L-1	Razor + unique peptides Q67L-2	Razor + unique peptides Q67L-3	Unique peptides Q67L-1	Unique peptides Q67L-2	Unique peptides Q67L-3	Sequence coverage [%]	Unique + razor sequence coverage [%]	Unique sequence coverage [%]	Mol. weight [kDa]	Sequence length	Sequence lengths	Fraction average	Fraction 1	Q-value	Score	Sequence coverage Q67L-1 [%]	Sequence coverage Q67L-2 [%]	Sequence coverage Q67L-3 [%]	Intensity	Intensity Q67L-1	Intensity Q67L-2	Intensity Q67L-3	MS/MS count Q67L-1	MS/MS count Q67L-2	MS/MS count Q67L-3	MS/MS count
A0AVT1;A0AVT1-2;A0AVT1-3;A0AVT1-4;H0Y8S8;H0Y9U5	A0AVT1;A0AVT1-2	33;21;11;10;9;1	33;21;11;10;9;1	33;21;11;10;9;1	1064000000	1077400000	1096600000	Ubiquitin-like modifier-activating enzyme 6	UBA6	;	6	33	33	33	28	26	25	28	26	25	28	26	25	42.7	42.7	42.7	117.97	1052	1052;578;389;340;271;88	1	394	0	148.58	35.9	35.3	31	12710000000	1255400000	859590000	1048700000	18	12	14	183
A0MZ66;A0MZ66-3;A0MZ66-4;A0MZ66-6;A0MZ66-5;A0MZ66-8;A0MZ66-2;A0MZ66-7	A0MZ66;A0MZ66-3;A0MZ66-4;A0MZ66-6;A0MZ66-5;A0MZ66-8;A0MZ66-2	14;14;13;13;12;11;10;4	14;14;13;13;12;11;10;4	14;14;13;13;12;11;10;4	133900000	134890000	154540000	Shootin-1	KIAA1598	;;;;;;	8	14	14	14	7	9	10	7	9	10	7	9	10	29.6	29.6	29.6	71.639	631	631;649;558;601;571;498;456;219	1	107	0	31.07	15.4	21.4	22.8	1914600000	113460000	156380000	160410000	2	1	3	36
A1L0T0;M0R026;E9PJS0;E9PL44;M0QZX5;M0R1B5	A1L0T0;M0R026	11;9;4;3;3;2	11;9;4;3;3;2	11;9;4;3;3;2	191670000	200770000	196050000	Acetolactate synthase-like protein	ILVBL	;	6	11	11	11	7	7	6	7	7	6	7	7	6	30.7	30.7	30.7	67.867	632	632;525;262;166;229;165	1	133	0	38.709	18.8	19.9	17.1	2397800000	237380000	195190000	187320000	4	5	7	65
A1X283;G3V144;H0Y507;Q5TCZ1-3;Q5TCZ1	A1X283;G3V144	5;3;1;1;1	5;3;1;1;1	5;3;1;1;1	44588000	38071000	39800000	SH3 and PX domain-containing protein 2B	SH3PXD2B	;	5	5	5	5	4	3	4	4	3	4	4	3	4	6.4	6.4	6.4	101.58	911	911;430;1060;1105;1133	1	30	0.0012591	2.7415	4.9	3.4	4.8	330220000	78605000	31019000	58573000	2	1	0	12
A2A2Q9;Q9Y312	A2A2Q9;Q9Y312	5;5	5;5	5;5	30430000	32144000	0	Protein AAR2 homolog	AAR2	;	2	5	5	5	4	2	0	4	2	0	4	2	0	17.8	17.8	17.8	45.034	398	398;384	1	26	0	12.61	13.8	6.3	0	236950000	37335000	15456000	0	0	0	0	9
A2A2V1;P04156-2;P04156;X6RKS3	A2A2V1;P04156-2;P04156;X6RKS3	2;2;2;1	2;2;2;1	2;2;2;1	32000000	32733000	0	Major prion protein	PRNP	;;;	4	2	2	2	2	2	1	2	2	1	2	2	1	9.6	9.6	9.6	27.278	249	249;246;253;217	1	24	0	5.3416	9.6	9.6	4.8	392430000	30343000	29942000	14913000	1	1	0	11
A2A3N6;B4DY52	A2A3N6	5;2	3;2	0;0	31340000	0	0	Putative PIP5K1A and PSMD4-like protein	PIPSL		2	5	3	0	4	3	2	2	1	1	0	0	0	7.1	4.3	0	95.047	862	862;198	1	17	0	6.5469	6.1	4.5	3.6	231350000	30447000	16045000	19429000	2	1	1	11
A2ACR1;P28065-2;P28065;A2ACR0;B4DZW2;A2ACQ9	A2ACR1;P28065-2;P28065;A2ACR0	6;6;6;4;2;2	6;6;6;4;2;2	6;6;6;4;2;2	237300000	241910000	285420000	Proteasome subunit beta type;Proteasome subunit beta type-9	PSMB9	;;;	6	6	6	6	5	5	5	5	5	5	5	5	5	41.8	41.8	41.8	20.96	196	196;209;219;131;154;178	1	62	0	24.581	35.7	35.7	35.7	3111800000	290110000	236550000	165500000	3	1	3	37
A2AE51;A2AE48;Q12899;Q5SPU2	A2AE51;A2AE48;Q12899	3;3;3;1	3;3;3;1	3;3;3;1	31020000	0	0	Tripartite motif-containing protein 26	TRIM26	;;	4	3	3	3	2	1	0	2	1	0	2	1	0	19.5	19.5	19.5	18.35	159	159;248;539;157	1	19	0.009755	1.6486	13.2	5.7	0	220440000	28730000	13374000	0	1	1	0	3
A2AEA2;P10321;F8W9Z8	A2AEA2;P10321	14;14;3	1;1;0	1;1;0	976800000	915680000	1171300000	HLA class I histocompatibility antigen, Cw-7 alpha chain	HLA-C	;	3	14	1	1	14	12	12	1	1	1	1	1	1	40.9	4.3	4.3	41.301	372	372;366;131	1	127	0	29.846	40.9	39.5	39.5	17767000000	1082200000	989390000	1662500000	5	5	6	72
A2IDC6;Q4TT38;Q13084;A2IDC7;Q4TT37	A2IDC6;Q4TT38;Q13084;A2IDC7;Q4TT37	4;4;4;3;3	4;4;4;3;3	4;4;4;3;3	39440000	31100000	38548000	39S ribosomal protein L28, mitochondrial	MRPL28	;;;;	5	4	4	4	3	3	2	3	3	2	3	3	2	18.3	18.3	18.3	28.506	240	240;256;256;194;218	1	26	0.00315	2.317	12.9	12.9	7.9	359880000	49410000	33901000	26765000	1	0	1	11
A4D1E9;A4D1E9-2;C9J8R7;C9JNI1;C9JEQ8	A4D1E9;A4D1E9-2	5;4;2;2;2	5;4;2;2;2	5;4;2;2;2	43211000	50219000	43978000	GTP-binding protein 10	GTPBP10	;	5	5	5	5	5	4	3	5	4	3	5	4	3	17.3	17.3	17.3	42.932	387	387;308;210;236;242	1	52	0	13.909	17.3	12.9	12.1	491770000	55436000	41168000	34532000	2	1	1	12
A5YKK6;A5YKK6-2;A5YKK6-3;A5YKK6-4;B5MDN3;H3BMZ2;H3BVC9;H3BT18;H3BU44;H3BNB1;H3BR89;H3BMH0	A5YKK6;A5YKK6-2;A5YKK6-3;A5YKK6-4;B5MDN3	30;29;26;17;15;7;2;1;1;1;1;1	30;29;26;17;15;7;2;1;1;1;1;1	30;29;26;17;15;7;2;1;1;1;1;1	289060000	322920000	273110000	CCR4-NOT transcription complex subunit 1	CNOT1	;;;;	12	30	30	30	18	19	17	18	19	17	18	19	17	16.7	16.7	16.7	266.94	2376	2376;2371;2150;1551;1227;439;241;62;96;185;193;277	1	232	0	54.148	8.8	8.6	9	3491200000	248380000	303830000	242500000	7	6	4	83
A6NDG6;H3BV17	A6NDG6	13;2	13;2	13;2	517430000	520910000	559170000	Phosphoglycolate phosphatase	PGP		2	13	13	13	12	11	12	12	11	12	12	11	12	48.6	48.6	48.6	34.006	321	321;57	1	170	0	112.75	46.1	43	45.5	6497400000	509520000	466860000	497120000	8	5	7	103
A6NDU8	A6NDU8	5	5	5	88287000	80242000	109980000	UPF0600 protein C5orf51	C5orf51		1	5	5	5	2	3	3	2	3	3	2	3	3	26.5	26.5	26.5	33.62	294	294	1	40	0	14.691	7.8	13.3	17.7	1048500000	59685000	63279000	133200000	1	2	0	19
A6NEL0;P05114;A6NL93;F2Z2W6;F2Z2Y5;H7BXJ5	A6NEL0;P05114;A6NL93	4;4;3;1;1;1	4;4;3;1;1;1	4;4;3;1;1;1	110670000	207000000	105130000	Non-histone chromosomal protein HMG-14	HMGN1	;;	6	4	4	4	4	3	3	4	3	3	4	3	3	36.2	36.2	36.2	12.435	116	116;100;90;44;45;48	1	39	0	8.333	36.2	29.3	29.3	1490600000	128500000	144320000	104030000	1	3	1	19
A6NEM2;P51610-2;P51610;P51610-4;P51610-3;H7C1C4;Q9Y5Z7	A6NEM2;P51610-2;P51610;P51610-4	17;17;17;17;6;3;1	17;17;17;17;6;3;1	17;17;17;17;6;3;1	271200000	292070000	320400000	Host cell factor 1;HCF N-terminal chain 1;HCF N-terminal chain 2;HCF N-terminal chain 3;HCF N-terminal chain 4;HCF N-terminal chain 5;HCF N-terminal chain 6;HCF C-terminal chain 1;HCF C-terminal chain 2;HCF C-terminal chain 3;HCF C-terminal chain 4;HCF C-terminal chain 5;HCF C-terminal chain 6	HCFC1	;;;	7	17	17	17	14	14	12	14	14	12	14	14	12	12.4	12.4	12.4	213.47	2080	2080;1966;2035;2079;428;611;792	1	161	0	46.034	9.7	9.8	8.6	3482000000	311430000	287860000	326810000	9	6	6	62
A6NFX8;Q9UKK9;A6NJU6;A6NCQ0;H0YEY4;C9JYY9	A6NFX8;Q9UKK9;A6NJU6;A6NCQ0	14;14;10;8;5;3	14;14;10;8;5;3	14;14;10;8;5;3	1468900000	1494600000	1477900000	ADP-sugar pyrophosphatase	NUDT5	;;;	6	14	14	14	14	14	14	14	14	14	14	14	14	66.8	66.8	66.8	25.895	232	232;219;186;180;137;97	1	267	0	102.2	66.8	66.8	66.8	18592000000	1592100000	1587200000	1399400000	19	12	15	189
A6NGP5;Q9H910;B4DLH4;H3BU16;H3BMV3;Q9H910-2;H3BMT0;H3BTV5;H3BMM8;B4E1P3	A6NGP5;Q9H910;B4DLH4;H3BU16;H3BMV3;Q9H910-2;H3BMT0;H3BTV5	5;5;5;4;4;4;3;3;2;2	5;5;5;4;4;4;3;3;2;2	5;5;5;4;4;4;3;3;2;2	142580000	101990000	85518000	Hematological and neurological expressed 1-like protein	HN1L	;;;;;;;	10	5	5	5	3	4	4	3	4	4	3	4	4	43.3	43.3	43.3	18.906	178	178;190;218;167;190;174;115;116;70;98	1	57	0	16.793	21.9	29.8	35.4	1369400000	133150000	88165000	91920000	2	4	1	36
A6NGW1;O95070;E9PIZ0;C9JST7;E9PS11	A6NGW1;O95070;E9PIZ0;C9JST7	4;4;3;3;1	4;4;3;3;1	4;4;3;3;1	117490000	103420000	110500000	Protein YIF1A	YIF1A	;;;	5	4	4	4	3	4	3	3	4	3	3	4	3	24.1	24.1	24.1	26.377	241	241;293;160;199;79	1	49	0	15.697	16.2	24.1	19.1	1366200000	111120000	92723000	83235000	3	1	1	22
A6NHR9;A6NHR9-2;J3KTL8;A6NHR9-3;J3KRK8;J3QSH1	A6NHR9;A6NHR9-2;J3KTL8;A6NHR9-3	16;15;12;10;1;1	16;15;12;10;1;1	16;15;12;10;1;1	153610000	147280000	163230000	Structural maintenance of chromosomes flexible hinge domain-containing protein 1	SMCHD1	;;;	6	16	16	16	10	9	6	10	9	6	10	9	6	9.9	9.9	9.9	226.37	2005	2005;1917;1388;762;49;150	1	118	0	25.937	5.8	5.4	3	1750700000	132610000	156700000	90537000	5	1	1	42
A6NMH6;A6NFQ9;F8W8I8;Q92599-2;Q92599-4;Q92599;Q92599-3;C9JV02;C9J4G8	A6NMH6;A6NFQ9;F8W8I8;Q92599-2;Q92599-4;Q92599;Q92599-3	7;7;7;7;7;7;4;2;1	4;4;4;4;4;4;1;1;1	4;4;4;4;4;4;1;1;1	0	0	75071000	Septin-8	8\Sep	;;;;;;	9	7	4	4	7	6	6	4	3	3	4	3	3	24.2	16.3	16.3	49.915	430	430;440;460;429;442;483;369;130;97	1	32	0	4.0305	24.2	22.1	22.1	681170000	66312000	58346000	70176000	1	0	0	2
A6NMQ1;P09884	A6NMQ1;P09884	5;5	5;5	5;5	27951000	0	31419000	DNA polymerase;DNA polymerase alpha catalytic subunit	POLA1	;	2	5	5	5	3	2	4	3	2	4	3	2	4	5.1	5.1	5.1	166.46	1468	1468;1462	1	38	0	14.699	2.5	1.7	3.6	287140000	22596000	12728000	33619000	2	1	0	12
A6NMQ3;C9JUF4;Q5T5H1;O43768-2;O43768;O43768-9;O43768-3;O43768-4;O43768-6;O43768-5;O43768-7;O43768-8;H3BQ52	A6NMQ3;C9JUF4;Q5T5H1;O43768-2;O43768;O43768-9;O43768-3;O43768-4;O43768-6;O43768-5;O43768-7;O43768-8	7;7;7;7;7;7;7;7;5;5;5;4;1	7;7;7;7;7;7;7;7;5;5;5;4;1	6;6;6;6;6;6;6;6;4;4;4;4;0	322230000	333760000	294750000	Alpha-endosulfine	ENSA	;;;;;;;;;;;	13	7	7	6	6	7	7	6	7	7	5	6	6	52.1	52.1	44.3	15.634	140	140;144;187;117;121;133;137;140;113;117;133;105;71	1	103	0	17.862	40	52.1	52.1	4737300000	362110000	428080000	342000000	2	6	2	47
A6NNI4;G8JLH6;P21926;F5GXT1	A6NNI4;G8JLH6;P21926	3;3;3;1	3;3;3;1	3;3;3;1	219010000	200930000	240770000	Tetraspanin;CD9 antigen	CD9	;;	4	3	3	3	3	3	3	3	3	3	3	3	3	26.4	26.4	26.4	17.764	159	159;228;228;141	1	52	0	25.556	26.4	26.4	26.4	2776200000	224410000	233710000	182000000	3	5	4	36
A6NNK5;Q12888;Q12888-3;Q12888-2;C9JXV0	A6NNK5;Q12888;Q12888-3;Q12888-2;C9JXV0	2;2;2;2;1	2;2;2;2;1	2;2;2;2;1	153640000	121730000	103250000	Tumor suppressor p53-binding protein 1	TP53BP1	;;;;	5	2	2	2	2	2	2	2	2	2	2	2	2	1.4	1.4	1.4	209.02	1927	1927;1972;1975;1977;1033	1	30	0	3.9121	1.4	1.4	1.4	1483200000	125110000	133030000	122950000	2	0	0	9
A6PVN5;Q15257-2;Q15257;Q15257-3;B4DZF8;Q15257-4;Q5T949;Q5T948;A6PVN9;Q68CR8;A6PVN6;B7ZBQ0;A6PVN8;A6PVN7;C9IZ76;B7ZBP9;B7ZBP7;B4DDQ6;H0Y6E5	A6PVN5;Q15257-2;Q15257;Q15257-3;B4DZF8;Q15257-4;Q5T949;Q5T948;A6PVN9;Q68CR8	11;11;11;10;9;9;7;7;7;6;5;4;4;3;3;2;2;2;2	11;11;11;10;9;9;7;7;7;6;5;4;4;3;3;2;2;2;2	11;11;11;10;9;9;7;7;7;6;5;4;4;3;3;2;2;2;2	559660000	518380000	632310000	Serine/threonine-protein phosphatase 2A activator	PPP2R4;DKFZp781M17165	;;;;;;;;;	19	11	11	11	9	9	9	9	9	9	9	9	9	39.5	39.5	39.5	37.375	329	329;323;358;294;374;281;250;253;263;104;176;61;129;64;132;41;77;151;218	1	129	0	59.502	32.5	32.5	33.4	7201000000	497060000	452220000	630820000	10	7	6	83
A8MT37;P49840;M0QYV0	A8MT37;P49840;M0QYV0	3;3;2	3;3;2	3;3;2	45735000	0	0	Glycogen synthase kinase-3 alpha	GSK3A	;;	3	3	3	3	3	2	2	3	2	2	3	2	2	10	10	10	44.919	401	401;483;167	1	26	0	6.4973	10	6.5	6.5	346110000	45919000	18871000	25708000	1	0	0	7
A8MT72;Q16799-3;Q16799-2;Q16799	A8MT72;Q16799-3;Q16799-2;Q16799	2;2;2;2	2;2;2;2	2;2;2;2	480760000	538420000	502470000	Reticulon;Reticulon-1	RTN1	;;;	4	2	2	2	2	2	2	2	2	2	2	2	2	8.3	8.3	8.3	21.862	193	193;208;356;776	1	46	0.0029084	2.321	8.3	8.3	8.3	6034600000	534110000	539070000	458440000	2	2	3	28
A8MTY9;E7EWN9;B7Z6B1;O14972;A8MY26;B7Z606	A8MTY9;E7EWN9;B7Z6B1;O14972;A8MY26;B7Z606	3;3;3;3;2;2	3;3;3;3;2;2	3;3;3;3;2;2	28582000	30716000	0	Down syndrome critical region protein 3	DSCR3	;;;;;	6	3	3	3	3	3	1	3	3	1	3	3	1	17.3	17.3	17.3	27.958	249	249;253;270;297;172;220	1	29	0	4.7126	17.3	17.3	7.6	321610000	30935000	30729000	11197000	1	1	0	12
A8MUM1;Q53HC9;C9JVR6;F8WDX0;F8WB12;F8WDS8;C9J0U9;D3YTH5	A8MUM1;Q53HC9;C9JVR6	4;4;2;1;1;1;1;1	4;4;2;1;1;1;1;1	4;4;2;1;1;1;1;1	55377000	0	0	Protein TSSC1	TSSC1	;;	8	4	4	4	3	2	1	3	2	1	3	2	1	19.6	19.6	19.6	46.319	414	414;387;178;58;87;132;155;314	1	22	0	7.9276	15	7.2	3.1	369430000	57210000	30851000	14687000	2	0	0	8
A8MVQ8;O95749;C9J6G3;C9J7M1	A8MVQ8;O95749;C9J6G3;C9J7M1	3;3;2;2	3;3;2;2	3;3;2;2	36217000	30754000	36662000	Geranylgeranyl pyrophosphate synthase	GGPS1	;;;	4	3	3	3	3	3	2	3	3	2	3	3	2	15.9	15.9	15.9	28.423	246	246;300;230;242	1	28	0	6.4637	15.9	15.9	9.3	341130000	40099000	33374000	20586000	1	0	1	10
A8MVR0;Q9Y6Y0	A8MVR0;Q9Y6Y0	5;5	5;5	5;5	79149000	73781000	65575000	Influenza virus NS1A-binding protein	IVNS1ABP	;	2	5	5	5	5	4	4	5	4	4	5	4	4	18.4	18.4	18.4	46.759	424	424;642	1	47	0	12.385	18.4	15.8	15.8	876970000	95157000	76507000	69452000	3	3	1	24
A8MW61;O43660;O43660-2;H0YA24;D6RA26;H0YAA2;B7Z982	A8MW61;O43660;O43660-2	9;9;8;4;3;1;1	9;9;8;4;3;1;1	9;9;8;4;3;1;1	102970000	126650000	131350000	Pleiotropic regulator 1	PLRG1	;;	7	9	9	9	6	5	6	6	5	6	6	5	6	29.2	29.2	29.2	57.181	514	514;514;505;156;212;106;131	1	78	0	18.74	17.5	13.8	16.9	1340300000	93649000	95774000	108750000	2	2	2	28
A8MWK3;P19022;C9J8J8;P55283-2;P55283	A8MWK3;P19022	10;10;1;1;1	10;10;1;1;1	10;10;1;1;1	269870000	255570000	300860000	Cadherin-2	CDH2	;	5	10	10	10	7	7	7	7	7	7	7	7	7	23.4	23.4	23.4	97.039	875	875;906;191;842;916	1	91	0	48.592	16.6	16.6	18.7	3237900000	274700000	290590000	289310000	4	6	6	62
A8MXP9;P43243;D6REM6;D6R991;B3KM87;P43243-2;H0Y8T4;D6R8Z5;D6RAM9;D6RAY2;D6RCM3;D6REK4;D6RBI2;D6RE02;D6RIA2;D6RB45;D6RGW7;D6R9F3;D6RBS2;D6RBK5	A8MXP9;P43243;D6REM6;D6R991	20;20;17;13;9;9;8;3;2;2;2;2;2;2;2;1;1;1;1;1	20;20;17;13;9;9;8;3;2;2;2;2;2;2;2;1;1;1;1;1	20;20;17;13;9;9;8;3;2;2;2;2;2;2;2;1;1;1;1;1	1000800000	1057900000	1072000000	Matrin-3	MATR3	;;;	20	20	20	20	17	17	17	17	17	17	17	17	17	32.4	32.4	32.4	99.966	895	895;847;794;433;509;559;334;107;81;86;99;100;109;124;172;47;77;78;87;121	1	287	0	67.895	25.5	28.9	28.7	12120000000	990880000	1026900000	911950000	12	17	13	148
A8MYQ9;J3KQW8;Q9BZG1-4;Q9BZG1;Q9BZG1-2;C9JBG0;E7ES60;C9JY26;V9GY61;K7EJW7;K7EIF2;H7C0Y7;J3QLC6	A8MYQ9;J3KQW8;Q9BZG1-4;Q9BZG1;Q9BZG1-2;C9JBG0;E7ES60;C9JY26	7;7;7;7;6;5;5;4;3;3;3;3;2	7;7;7;7;6;5;5;4;3;3;3;3;2	7;7;7;7;6;5;5;4;3;3;3;3;2	91681000	97495000	79775000	Ras-related protein Rab-34	RAB34	;;;;;;;	13	7	7	7	6	4	4	6	4	4	6	4	4	30.8	30.8	30.8	29.2	260	260;316;237;259;251;210;268;258;48;51;149;171;156	1	73	0	12.116	25.4	15.4	15.4	1164000000	119020000	80028000	64943000	2	2	2	31
A8MZF9;P55039;J3KRL5;J3QR71;J3QRI9;J3QKW7;J3QL90;J3QKV7;J3QLF3	A8MZF9;P55039	7;7;3;3;3;3;2;2;1	7;7;3;3;3;3;2;2;1	7;7;3;3;3;3;2;2;1	98721000	105250000	112740000	Developmentally-regulated GTP-binding protein 2	DRG2	;	9	7	7	7	5	4	5	5	4	5	5	4	5	23.6	23.6	23.6	38.129	343	343;364;113;158;172;244;112;161;90	1	66	0	13.575	14.6	11.7	15.2	1221300000	106710000	81163000	104290000	1	1	2	18
A9Z1X7;E9PCT1;Q8IYB3-2;Q8IYB3;M0R088;B4DED5;M0R1E7;M0QXG5	A9Z1X7;E9PCT1;Q8IYB3-2;Q8IYB3;M0R088;B4DED5	4;4;4;4;3;2;1;1	4;4;4;4;3;2;1;1	4;4;4;4;3;2;1;1	150610000	170510000	167030000	Serine/arginine repetitive matrix protein 1	SRRM1	;;;;;	8	4	4	4	3	3	3	3	3	3	3	3	3	8.1	8.1	8.1	103.39	913	913;916;902;904;681;318;79;101	1	55	0	20.969	4.4	4.4	4.4	1941700000	104830000	188480000	175020000	3	2	3	33
B0FLL2;O60825;O60825-2;B4DI16;B4DY91;F2Z2I2;Q5W015;Q5VX20;Q16875-3;Q16875-2;Q16875;Q16875-4;H0Y483;Q4VBA9;B7Z5C3;Q66S35;P16118-2;Q5XLC2;Q64EX5;Q16877;P16118	B0FLL2;O60825;O60825-2;B4DI16;B4DY91	7;7;5;4;4;2;2;2;2;2;2;2;1;1;1;1;1;1;1;1;1	7;7;5;4;4;2;2;2;2;2;2;2;1;1;1;1;1;1;1;1;1	7;7;5;4;4;2;2;2;2;2;2;2;1;1;1;1;1;1;1;1;1	0	45798000	52270000	6-phosphofructo-2-kinase/fructose-2,6-bisphosphatase 2;6-phosphofructo-2-kinase;Fructose-2,6-bisphosphatase	PFKFB2	;;;;	21	7	7	7	4	5	4	4	5	4	4	5	4	16.5	16.5	16.5	54.777	472	472;505;471;264;373;455;513;526;500;514;520;534;143;271;458;462;406;434;435;469;471	1	49	0	4.15	8.5	10.8	8.5	474010000	35741000	51370000	40884000	0	1	1	8
B0QY89;Q9Y262;Q9Y262-2;B0QY90;C9JHP4;C9K0Q7;H7C3A0;H0Y7E6	B0QY89;Q9Y262;Q9Y262-2;B0QY90	21;21;20;16;6;6;4;3	21;21;20;16;6;6;4;3	21;21;20;16;6;6;4;3	1163500000	1130000000	1167100000	Eukaryotic translation initiation factor 3 subunit L	EIF3L	;;;	8	21	21	21	17	16	17	17	16	17	17	16	17	38.2	38.2	38.2	70.901	607	607;564;516;466;150;183;127;109	1	268	0	262.1	31.5	31.3	31.5	14153000000	1135700000	1084700000	1007400000	13	12	17	166
B0QYK0;Q01844-6;Q01844-3;Q01844;Q01844-5;C9JGE3;Q01844-2;H7BY36;Q01844-4	B0QYK0;Q01844-6;Q01844-3;Q01844;Q01844-5;C9JGE3;Q01844-2;H7BY36	6;6;6;6;6;5;5;4;1	6;6;6;6;6;5;5;4;1	6;6;6;6;6;5;5;4;1	327140000	322630000	364260000	RNA-binding protein EWS	EWSR1	;;;;;;;	9	6	6	6	5	4	5	5	4	5	5	4	5	13.6	13.6	13.6	64.929	618	618;600;655;656;661;583;583;308;354	1	99	0	115.2	12.6	11.2	10.5	4443100000	347180000	279880000	407520000	4	3	4	61
B1AH87;P30536	B1AH87;P30536	3;3	3;3	3;3	860690000	665500000	636940000	Translocator protein	TSPO	;	2	3	3	3	2	2	2	2	2	2	2	2	2	36.4	36.4	36.4	11.896	107	107;169	1	42	0	7.3964	15	15	15	7899400000	864020000	671280000	600010000	2	3	2	30
B1AHD1;P55769	B1AHD1;P55769	4;4	4;4	4;4	150030000	159980000	182690000	NHP2-like protein 1;NHP2-like protein 1, N-terminally processed	NHP2L1	;	2	4	4	4	4	4	4	4	4	4	4	4	4	32.6	32.6	32.6	14.627	132	132;128	1	47	0	62.514	32.6	32.6	32.6	2093900000	160660000	183190000	180500000	2	1	3	23
B1AJY5;B1AJY7;O75832;B1AJY6;O75832-2	B1AJY5;B1AJY7;O75832	8;8;8;3;3	8;8;8;3;3	8;8;8;3;3	205710000	207130000	192330000	26S proteasome non-ATPase regulatory subunit 10	PSMD10	;;	5	8	8	8	6	6	6	6	6	6	6	6	6	53.5	53.5	53.5	20.217	185	185;193;226;110;151	1	94	0	27.472	42.7	42.7	42.7	2454300000	186680000	210850000	204550000	7	5	3	48
B1AKD8;Q5TZA2;Q5TZA2-2	B1AKD8;Q5TZA2;Q5TZA2-2	5;5;3	5;5;3	5;5;3	747940000	754660000	686750000	Rootletin	CROCC	;;	3	5	5	5	2	3	3	2	3	3	2	3	3	3.2	3.2	3.2	149.06	1311	1311;2017;1313	1	46	0	6.3587	1.3	2	2	8478300000	759580000	656090000	656780000	2	1	1	19
B1AKJ5;O43847;O43847-2;G3V1R5;F5H7V1;H0Y5G9	B1AKJ5;O43847;O43847-2;G3V1R5;F5H7V1	32;32;32;30;20;12	32;32;32;30;20;12	32;32;32;30;20;12	931550000	960190000	1010600000	Nardilysin	NRD1	;;;;	6	32	32	32	27	24	20	27	24	20	27	24	20	32.6	32.6	32.6	139.41	1219	1219;1150;1218;1087;747;538	1	369	0	174	27.4	23.5	19.9	12184000000	945860000	950440000	793520000	22	16	16	208
B1AKJ6;J3KPA3;Q96SU4-7;Q96SU4-2;Q96SU4;Q96SU4-6;E9PJW9;Q96SU4-5;Q96SU4-4;Q96SU4-3;H0YE19;E9PKX6;H0YCW0;E9PJ80;E9PLH0;E9PNR1	B1AKJ6;J3KPA3;Q96SU4-7;Q96SU4-2;Q96SU4;Q96SU4-6;E9PJW9;Q96SU4-5;Q96SU4-4;Q96SU4-3	8;8;8;8;8;8;7;6;6;6;3;1;1;1;1;1	8;8;8;8;8;8;7;6;6;6;3;1;1;1;1;1	8;8;8;8;8;8;7;6;6;6;3;1;1;1;1;1	124920000	111860000	89900000	Oxysterol-binding protein;Oxysterol-binding protein-related protein 9	OSBPL9	;;;;;;;;;	16	8	8	8	6	6	7	6	6	7	6	6	7	12.1	12.1	12.1	83.785	741	741;754;719;723;736;746;655;558;571;626;196;32;34;41;92;109	1	76	0	18.026	8.1	9.4	10.7	1490400000	121160000	114870000	95035000	5	2	2	31
B1ALK7;B7Z6G2;Q14155-1;Q14155-5;Q14155-6;Q14155-2;Q14155-3;Q14155;E7EUY6;E9PDQ5;B7Z6D9;E7EU80	B1ALK7;B7Z6G2;Q14155-1;Q14155-5;Q14155-6;Q14155-2;Q14155-3;Q14155;E7EUY6;E9PDQ5	9;9;9;9;8;8;8;8;7;6;2;1	9;9;9;9;8;8;8;8;7;6;2;1	9;9;9;9;8;8;8;8;7;6;2;1	90566000	108660000	132510000	Rho guanine nucleotide exchange factor 7	ARHGEF7	;;;;;;;;;	12	9	9	9	6	4	7	6	4	7	6	4	7	15.7	15.7	15.7	79.831	705	705;721;646;731;625;753;782;803;447;547;181;151	1	63	0	16.556	10.2	6.8	11.6	1257200000	93864000	67966000	145430000	2	2	2	27
B1ALM5;Q9P0T7;B1ALM7;B1ALM8;B1ALM4;Q9NQ34-2;Q9NQ34	B1ALM5;Q9P0T7	3;3;1;1;1;1;1	3;3;1;1;1;1;1	3;3;1;1;1;1;1	70377000	71930000	68609000	Transmembrane protein 9	TMEM9	;	7	3	3	3	2	3	2	2	3	2	2	3	2	21	21	21	20.958	186	186;183;138;151;163;124;198	1	28	0	4.6831	10.8	21	10.8	837170000	63112000	74620000	58971000	1	2	0	11
B1AMU3;Q9Y3B2;R4GNH9;R4GMQ7;B1AMU7;B1AMU4	B1AMU3;Q9Y3B2;R4GNH9;R4GMQ7;B1AMU7;B1AMU4	4;4;3;3;3;3	4;4;3;3;3;3	4;4;3;3;3;3	40650000	40343000	38200000	Exosome complex component CSL4	EXOSC1	;;;;;	6	4	4	4	3	3	3	3	3	3	3	3	3	31.2	31.2	31.2	18.816	170	170;195;139;143;165;178	1	45	0	11.451	24.7	22.9	22.9	507820000	35750000	30307000	31132000	2	2	1	23
B1AMW1;P19256-2;P19256-3;P19256;H0YDI1	B1AMW1;P19256-2;P19256-3;P19256	3;3;3;3;1	3;3;3;3;1	3;3;3;3;1	82321000	77890000	96861000	Lymphocyte function-associated antigen 3	CD58	;;;	5	3	3	3	3	3	3	3	3	3	3	3	3	14.6	14.6	14.6	27.018	240	240;237;248;250;131	1	35	0	9.9574	14.6	14.6	14.6	1140600000	90005000	90201000	95874000	3	1	3	27
B1ANH0;Q16774-2;B1ANG9;Q16774;Q16774-3;B1ANH5;B1ANH2;B1ANH6;B1ANH3	B1ANH0;Q16774-2;B1ANG9;Q16774;Q16774-3;B1ANH5;B1ANH2;B1ANH6;B1ANH3	8;8;7;7;7;6;6;5;4	8;8;7;7;7;6;6;5;4	8;8;7;7;7;6;6;5;4	375330000	360810000	402250000	Guanylate kinase	GUK1	;;;;;;;;	9	8	8	8	7	6	8	7	6	8	7	6	8	53.9	53.9	53.9	23.711	217	217;218;218;197;241;199;253;242;272	1	113	0	21.786	47.9	40.6	53.9	4216400000	421380000	264630000	368570000	5	3	5	52
B1APY4;Q01974	B1APY4;Q01974	7;7	7;7	7;7	0	0	21560000	Tyrosine-protein kinase transmembrane receptor ROR2	ROR2	;	2	7	7	7	3	3	2	3	3	2	3	3	2	13.4	13.4	13.4	79.27	704	704;943	1	37	0	6.413	5.1	5.1	5	378720000	31763000	26904000	11188000	0	0	0	6
B1AVQ5;P15941-4;P15941-3;P15941;P15941-2;P15941-7;P15941-17;P15941-11;P15941-8;B1AVQ7;P15941-15;P15941-6;P15941-12;P15941-16;P15941-9;P15941-13;P15941-10;V9GZ38;P15941-5	B1AVQ5;P15941-4;P15941-3;P15941;P15941-2;P15941-7;P15941-17;P15941-11;P15941-8;B1AVQ7;P15941-15;P15941-6	7;7;7;7;7;6;6;6;6;5;4;4;3;3;3;3;3;1;1	7;7;7;7;7;6;6;6;6;5;4;4;3;3;3;3;3;1;1	7;7;7;7;7;6;6;6;6;5;4;4;3;3;3;3;3;1;1	729630000	891320000	817630000	Mucin-1;Mucin-1 subunit alpha;Mucin-1 subunit beta	MUC1	;;;;;;;;;;;	19	7	7	7	7	7	7	7	7	7	7	7	7	20.2	20.2	20.2	49.224	475	475;1243;1252;1255;1264;255;259;264;273;229;224;230;159;166;168;198;203;251;1087	1	135	0	87.764	20.2	20.2	20.2	9829900000	811370000	846070000	830260000	7	7	6	80
B2WTI3;B2WTI4;K7EJU9;Q6NYC1-2;Q6NYC1;Q6NYC1-3	B2WTI3;B2WTI4;K7EJU9;Q6NYC1-2;Q6NYC1;Q6NYC1-3	6;6;6;6;6;6	6;6;6;6;6;6	6;6;6;6;6;6	76795000	71497000	96513000	Bifunctional arginine demethylase and lysyl-hydroxylase JMJD6	JMJD6	;;;;;	6	6	6	6	4	4	4	4	4	4	4	4	4	26	26	26	39.241	335	335;361;395;372;403;414	1	56	0	35.167	18.8	20	20	994920000	87655000	83510000	94945000	4	4	5	43
B3KMG4;Q9HCJ1	B3KMG4;Q9HCJ1	2;2	2;2	2;2	0	12416000	0	Progressive ankylosis protein homolog	ANKH	;	2	2	2	2	2	2	1	2	2	1	2	2	1	7.1	7.1	7.1	32.259	294	294;492	1	15	0.00026076	3.2138	7.1	7.1	3.1	80437000	8347600	10706000	7456000	2	1	0	10
B3KRB7;O14920-4;O14920-2;O14920;E5RGW5;G3V105	B3KRB7;O14920-4;O14920-2;O14920	3;3;3;3;1;1	3;3;3;3;1;1	3;3;3;3;1;1	44008000	0	35043000	Inhibitor of nuclear factor kappa-B kinase subunit beta	IKBKB	;;;	6	3	3	3	2	2	3	2	2	3	2	2	3	6.2	6.2	6.2	60.819	533	533;697;754;756;375;562	1	23	0.00025582	2.9242	4.1	4.5	6.2	376570000	47251000	36624000	41414000	0	0	0	8
B3KS98;O15372;E5RJT0;E5RGU4;E5RFW7;E5RFH0;E5RHC7;E5RH59	B3KS98;O15372	15;15;7;4;3;3;2;2	15;15;7;4;3;3;2;2	15;15;7;4;3;3;2;2	898870000	873200000	859630000	Eukaryotic translation initiation factor 3 subunit H	EIF3H	;	8	15	15	15	13	12	15	13	12	15	13	12	15	43.7	43.7	43.7	41.581	366	366;352;244;235;97;170;46;56	1	222	0	76.477	35.8	33.3	43.7	10523000000	896490000	801710000	882740000	8	7	5	104
B3KSH1;O00303;B4DEW9;H0YDT6;E9PQV8	B3KSH1;O00303;B4DEW9	13;13;11;4;1	13;13;11;4;1	13;13;11;4;1	1400000000	1290000000	1374700000	Eukaryotic translation initiation factor 3 subunit F	EIF3F	;;	5	13	13	13	12	12	12	12	12	12	12	12	12	47.6	47.6	47.6	39.146	372	372;357;208;100;124	1	189	0	123.79	45.2	42.5	42.5	16646000000	1778200000	1053700000	1196100000	10	12	11	125
B3KWN8;Q8WU10;B4DEW4	B3KWN8;Q8WU10;B4DEW4	4;4;2	4;4;2	4;4;2	28434000	0	0	Pyridine nucleotide-disulfide oxidoreductase domain-containing protein 1	PYROXD1	;;	3	4	4	4	3	1	2	3	1	2	3	1	2	12.8	12.8	12.8	48.338	429	429;500;139	1	27	0	6.0968	9.3	2.3	5.8	289330000	29641000	9512400	27626000	1	1	0	6
B3KXE0;P32780;F5H0Y9;E9PM51	B3KXE0;P32780;F5H0Y9;E9PM51	2;2;1;1	2;2;1;1	2;2;1;1	11939000	0	0	General transcription factor IIH subunit 1	GTF2H1	;;;	4	2	2	2	1	0	0	1	0	0	1	0	0	6.5	6.5	6.5	48.738	432	432;548;138;236	1	10	0	3.9745	3.9	0	0	46919000	11980000	0	0	1	0	0	4
B3KY94;O14735-3;O14735;H3BUR9	B3KY94;O14735-3;O14735	4;4;4;1	4;4;4;1	4;4;4;1	120780000	175880000	164810000	CDP-diacylglycerol--inositol 3-phosphatidyltransferase	CDIPT	;;	4	4	4	4	4	4	3	4	4	3	4	4	3	19.8	19.8	19.8	25.946	237	237;168;213;157	1	54	0	8.9376	19.8	19.8	14.3	1665800000	134190000	170000000	132710000	4	2	1	28
B4DDF4;B4DUT8;Q99439;Q99439-2;H3BVI6;K7ES69;H3BQH0;U3KPS3	B4DDF4;B4DUT8;Q99439;Q99439-2;H3BVI6	13;13;13;10;8;6;4;2	13;13;13;10;8;6;4;2	12;12;12;9;8;5;4;2	737970000	819050000	727060000	Calponin;Calponin-2	CNN2	;;;;	8	13	13	12	8	12	10	8	12	10	8	11	10	59.1	59.1	55.4	32.616	298	298;330;309;270;218;148;154;103	1	164	0	220.56	38.9	53.4	42.6	10700000000	479790000	707930000	703580000	7	8	7	103
B4DDF9	B4DDF9	20	1	1	0	0	31376000	Annexin A4	ANXA4		1	20	1	1	16	11	14	1	1	1	1	1	1	74.3	5.5	5.5	27.062	237	237	1	6	1	-2	61.6	51.5	53.2	48230000	6503400	0	29330000	0	2	1	4
B4DDM3;Q15036-2;Q15036	B4DDM3;Q15036-2;Q15036	3;3;3	3;3;3	3;3;3	15830000	0	0	Sorting nexin-17	SNX17	;;	3	3	3	3	2	2	1	2	2	1	2	2	1	13.7	13.7	13.7	28.505	256	256;445;470	1	11	0.002929	2.396	10.9	10.9	4.3	165050000	15971000	21282000	10098000	1	0	0	3
B4DEX5;F6QUN3;H0Y4B0;O43414-3;O43414-2;O43414;F6UGJ8	B4DEX5;F6QUN3;H0Y4B0;O43414-3;O43414-2;O43414;F6UGJ8	2;2;2;2;2;2;1	2;2;2;2;2;2;1	2;2;2;2;2;2;1	50734000	0	49172000	ERI1 exoribonuclease 3	PRNPIP;ERI3	;;;;;;	7	2	2	2	2	1	2	2	1	2	2	1	2	17.5	17.5	17.5	18.185	160	160;176;204;128;222;337;250	1	29	0	8.0075	17.5	11.9	17.5	577180000	54634000	14065000	34939000	2	2	0	16
B4DF47;Q9BUK6-5;Q9BUK6-7;Q9BUK6-3;Q9BUK6-2;Q9BUK6	B4DF47;Q9BUK6-5;Q9BUK6-7;Q9BUK6-3;Q9BUK6-2;Q9BUK6	3;3;3;3;3;3	3;3;3;3;3;3	3;3;3;3;3;3	0	20946000	23435000	Protein misato homolog 1	MSTO1	;;;;;	6	3	3	3	2	2	2	2	2	2	2	2	2	11.1	11.1	11.1	34.737	315	315;391;524;558;569;570	1	25	0	3.8995	7.3	7.3	6.7	226290000	12737000	10059000	19739000	0	1	1	7
B4DFL2;P48735;B4DSZ6;H0YL11	B4DFL2;P48735;B4DSZ6	10;10;6;4	10;10;6;4	10;10;6;4	99834000	103010000	91313000	Isocitrate dehydrogenase [NADP], mitochondrial	IDH2	;;	4	10	10	10	9	8	6	9	8	6	9	8	6	27.8	27.8	27.8	45.179	400	400;452;322;312	1	85	0	14.262	25	21.8	18.2	1146100000	142170000	104160000	81047000	3	3	2	31
B4DFQ4;Q8N668	B4DFQ4;Q8N668	2;2	2;2	2;2	38133000	0	35114000	COMM domain-containing protein 1	COMMD1	;	2	2	2	2	2	2	2	2	2	2	2	2	2	22	22	22	17.665	159	159;190	1	25	0	4.6413	22	22	22	405790000	40564000	24308000	31921000	1	2	0	12
B4DGL8;O75027;O75027-2;O75027-3;E9PJR8;E9PNQ5	B4DGL8;O75027;O75027-2;O75027-3	5;5;5;4;2;1	5;5;5;4;2;1	5;5;5;4;2;1	46298000	46111000	51818000	ATP-binding cassette sub-family B member 7, mitochondrial	ABCB7	;;;	6	5	5	5	2	4	3	2	4	3	2	4	3	9	9	9	77.12	702	702;752;753;712;188;171	1	42	0	14.894	4.1	7.3	5.8	618420000	32318000	41121000	38796000	2	1	1	20
B4DGU4;P35222	B4DGU4;P35222	11;11	6;6	6;6	118370000	113630000	108190000	Catenin beta-1	CTNNB1	;	2	11	6	6	11	10	11	6	5	6	6	5	6	17.4	10.3	10.3	84.765	774	774;781	1	91	0	19.219	17.4	15.1	17.4	1492000000	140640000	118600000	140090000	4	1	3	32
B4DGX2;P48426;H7BXS3;S4R320;Q5JUT3	B4DGX2;P48426;H7BXS3	4;4;3;1;1	3;3;2;1;1	3;3;2;1;1	32676000	0	31938000	Phosphatidylinositol 5-phosphate 4-kinase type-2 alpha	PIP4K2A	;;	5	4	3	3	4	2	3	3	1	2	3	1	2	16.4	11.5	11.5	39.802	347	347;406;266;142;215	1	28	0.0024631	2.5108	16.4	9.2	13.5	323470000	34028000	9903600	23287000	0	0	1	8
B4DH53;Q66K74;M0R1M7;M0QXQ9;M0QY41;M0QZ50;M0R1J2	B4DH53;Q66K74	13;13;3;2;2;1;1	13;13;3;2;2;1;1	13;13;3;2;2;1;1	170920000	216680000	186460000	Microtubule-associated protein 1S;MAP1S heavy chain;MAP1S light chain	MAP1S	;	7	13	13	13	8	10	9	8	10	9	8	10	9	16.1	16.1	16.1	109.79	1033	1033;1059;120;185;189;93;188	1	127	0	27.474	8.5	11.6	9.8	2303100000	134720000	205160000	174590000	1	1	1	27
B4DHE8;Q96DH6-2;Q96DH6;J3KTC1;J3QKT5;B4DM51;Q96DH6-3;H0YHB7;O43347	B4DHE8;Q96DH6-2;Q96DH6;J3KTC1;J3QKT5;B4DM51;Q96DH6-3	6;6;6;5;3;3;3;1;1	6;6;6;5;3;3;3;1;1	6;6;6;5;3;3;3;1;1	134000000	128640000	125570000	RNA-binding protein Musashi homolog 2	MSI2	;;;;;;	9	6	6	6	6	5	5	6	5	5	6	5	5	23.8	23.8	23.8	34.812	324	324;251;328;140;99;267;151;233;362	1	71	0	19.037	23.8	20.1	21.3	1512000000	157240000	106460000	112890000	4	1	0	18
B4DJM7;Q5VV41-2;Q5VV41;B0QZD3;B0QZD4	B4DJM7;Q5VV41-2;Q5VV41;B0QZD3;B0QZD4	2;2;2;1;1	2;2;2;1;1	2;2;2;1;1	0	20602000	0	Rho guanine nucleotide exchange factor 16	ARHGEF16	;;;;	5	2	2	2	2	2	0	2	2	0	2	2	0	7.7	7.7	7.7	47.184	413	413;421;709;146;180	1	16	0	7.1756	7.7	7.7	0	132190000	17064000	19259000	0	2	1	0	12
B4DJP7;P62318;H3BT13	B4DJP7;P62318;H3BT13	4;4;2	4;4;2	4;4;2	1174200000	1221100000	1186300000	Small nuclear ribonucleoprotein Sm D3	SNRPD3	;;	3	4	4	4	4	4	4	4	4	4	4	4	4	50	50	50	13.291	120	120;126;62	1	116	0	133.17	50	50	50	14330000000	1247900000	1271800000	1165600000	9	8	11	99
B4DJV2;O75390;H0YIC4;F8VPA1;H0YH82;F8VRI6;F8VPF9;F8VR34;F8VTT8;F8W1S4;F8W4S1;F8VRP1;F8VX68;F8W642;F8VZK9;F8VX07;F8VWQ5;F8VU34;F8W0J2	B4DJV2;O75390	18;18;7;5;5;4;4;4;4;4;4;3;3;2;2;2;2;2;1	18;18;7;5;5;4;4;4;4;4;4;3;3;2;2;2;2;2;1	17;17;7;5;5;4;4;3;3;4;3;3;3;2;2;2;1;1;0	2526500000	2536700000	2387100000	Citrate synthase;Citrate synthase, mitochondrial	CS	;	19	18	18	17	15	16	16	15	16	16	14	15	15	52.5	52.5	50.6	50.431	453	453;466;123;144;190;140;140;146;149;157;178;117;120;66;80;114;132;142;75	1	299	0	114.99	41.1	41.1	41.5	30480000000	2539300000	2595600000	2216300000	18	16	17	188
B4DKB2;P42892-3;P42892-2;P42892-4;P42892;E9PJG1;E9PHZ1	B4DKB2;P42892-3;P42892-2;P42892-4;P42892	24;24;24;24;24;2;1	24;24;24;24;24;2;1	24;24;24;24;24;2;1	1323000000	1318800000	1333300000	Endothelin-converting enzyme 1	ECE1	;;;;	7	24	24	24	22	22	19	22	22	19	22	22	19	40.4	40.4	40.4	83.573	738	738;754;758;767;770;77;134	1	386	0	190.56	37.8	39.3	34.3	16376000000	1472600000	1290700000	1275600000	21	20	17	245
B4DKR0;Q13190-3;Q13190-2;Q13190-4;Q13190;H7C3X5;E9PNU4	B4DKR0;Q13190-3;Q13190-2;Q13190-4;Q13190;H7C3X5;E9PNU4	5;5;5;5;5;4;3	5;5;5;5;5;4;3	5;5;5;5;5;4;3	185670000	173030000	144630000	Syntaxin-5	STX5A;STX5	;;;;;;	7	5	5	5	4	3	5	4	3	5	4	3	5	32	32	32	29.233	259	259;267;301;321;355;158;250	1	62	0	52.377	28.6	23.9	32	1972600000	129500000	217370000	125440000	2	4	4	42
B4DKY1;P49589-2;P49589;P49589-3;A8MVQ3;C9JLN0;E9PRS8;E9PLP0	B4DKY1;P49589-2;P49589;P49589-3;A8MVQ3	16;16;16;16;14;2;2;2	16;16;16;16;14;2;2;2	16;16;16;16;14;2;2;2	294830000	280500000	315780000	Cysteine--tRNA ligase, cytoplasmic	CARS	;;;;	8	16	16	16	13	12	12	13	12	12	13	12	12	25.3	25.3	25.3	84.277	739	739;726;748;831;738;45;76;128	1	161	0	98.106	21.1	18.5	18.8	3625200000	295810000	230470000	336790000	7	8	7	83
B4DLM5;F5GYY6;Q13093	B4DLM5;F5GYY6;Q13093	1;1;1	1;1;1	1;1;1	6154100	0	0	Platelet-activating factor acetylhydrolase	PLA2G7	;;	3	1	1	1	1	0	0	1	0	0	1	0	0	16.8	16.8	16.8	15.568	137	137;219;441	1	3	0.0051899	2.0156	16.8	0	0	21904000	6163200	0	0	0	0	0	2
B4DLR2;Q12884;Q12884-2;H7C4D9	B4DLR2;Q12884	6;6;2;1	6;6;2;1	6;6;2;1	44132000	0	48770000	Prolyl endopeptidase FAP;Antiplasmin-cleaving enzyme FAP, soluble form	FAP	;	4	6	6	6	5	5	3	5	5	3	5	5	3	8.6	8.6	8.6	84.861	735	735;760;239;25	1	49	0	8.0611	6.8	6.7	3.8	510590000	48167000	43085000	30488000	1	1	2	14
B4DMQ3;Q9BW27;J3QL54;J3KT10;B4DPW1;J3QLD4;J3QLH0;J3QLV0;F5H0W7;J3QL91;J3KSH3;J3KRC0	B4DMQ3;Q9BW27;J3QL54;J3KT10;B4DPW1;J3QLD4;J3QLH0	7;7;6;6;5;4;4;3;3;1;1;1	7;7;6;6;5;4;4;3;3;1;1;1	7;7;6;6;5;4;4;3;3;1;1;1	56157000	59774000	0	Nuclear pore complex protein Nup85	NUP85	;;;;;;	12	7	7	7	6	4	4	6	4	4	6	4	4	15.1	15.1	15.1	69.799	610	610;656;544;611;462;272;302;191;259;114;120;169	1	52	0	11.964	12.8	8.4	7.7	609670000	69561000	53027000	52623000	2	1	0	11
B4DNM9;O15228;Q5TBH8	B4DNM9;O15228;Q5TBH8	5;5;4	5;5;4	5;5;4	58618000	0	0	Dihydroxyacetone phosphate acyltransferase	GNPAT	;;	3	5	5	5	4	2	2	4	2	2	4	2	2	14.1	14.1	14.1	69.906	619	619;680;587	1	38	0	4.8405	11.5	5	5	517700000	59001000	27525000	27441000	1	0	0	8
B4DQ14;Q9BY44;F8WAE5;B4DF96;Q9BY44-2;H7C5R5;C9IZE1;H7C5Q3;F8WF18;F8WAT3	B4DQ14;Q9BY44;F8WAE5;B4DF96;Q9BY44-2	21;21;20;18;12;9;8;5;1;1	21;21;20;18;12;9;8;5;1;1	21;21;20;18;12;9;8;5;1;1	1012200000	940820000	978400000	Eukaryotic translation initiation factor 2A;Eukaryotic translation initiation factor 2A, N-terminally processed	EIF2A	;;;;	10	21	21	21	20	18	18	20	18	18	20	18	18	48.9	48.9	48.9	62.288	560	560;585;580;524;371;316;236;158;59;75	1	280	0	51.695	45.9	47.1	40.5	11927000000	1058800000	963720000	958340000	9	6	6	91
B4DQJ8;P52209;F5H7U0;K7EM49;K7EPF6;K7EMN2;K7ELN9	B4DQJ8;P52209;F5H7U0	25;25;24;10;10;8;8	25;25;24;10;10;8;8	25;25;24;10;10;8;8	7905700000	7786100000	8447900000	6-phosphogluconate dehydrogenase, decarboxylating	PGD	;;	7	25	25	25	20	22	21	20	22	21	20	22	21	66	66	66	51.872	470	470;483;461;205;256;160;224	1	478	0	323.31	51.9	56	55.3	102910000000	7351900000	7254200000	7445900000	28	31	26	367
B4DR61;P61619;P61619-3;F8W776;Q8TC24;Q9H9S3-2;Q9H9S3-3;Q9H9S3;H7C1Q9;H7C069;A6NK38;F2Z2C7;A6NIF9;C9JJV4	B4DR61;P61619;P61619-3	9;9;5;4;4;4;4;4;3;3;3;3;3;3	9;9;5;4;4;4;4;4;3;3;3;3;3;3	6;6;5;1;1;1;1;1;0;0;0;0;0;0	1165900000	1151200000	841140000	Protein transport protein Sec61 subunit alpha isoform 1	SEC61A1	;;	14	9	9	6	6	6	7	6	6	7	4	4	5	23.9	23.9	15.4	52.949	482	482;476;357;410;418;437;454;476;94;145;159;162;168;189	1	101	0	100.65	12.2	12.2	14.5	12818000000	1125900000	1034300000	822980000	4	2	4	49
B4DR80;Q9Y6E0-2;Q9Y6E0;H0Y630;Q5JV99;Q5JV98	B4DR80;Q9Y6E0-2;Q9Y6E0;H0Y630	11;11;10;8;5;4	11;11;10;8;5;4	6;6;5;4;3;2	197360000	229590000	179600000	Serine/threonine-protein kinase 24;Serine/threonine-protein kinase 24 36 kDa subunit;Serine/threonine-protein kinase 24 12 kDa subunit	STK24	;;;	6	11	11	6	9	6	6	9	6	6	5	3	3	34	34	23.3	45.835	412	412;431;443;369;142;209	1	95	0	98.442	26.9	19.9	19.9	2515600000	225430000	172650000	154840000	5	2	1	37
B4DRL9;P24386	B4DRL9;P24386	2;2	2;2	2;2	32155000	29823000	0	Rab proteins geranylgeranyltransferase component A 1	CHM	;	2	2	2	2	2	2	1	2	2	1	2	2	1	5.5	5.5	5.5	57.264	505	505;653	1	19	0	8.2788	5.5	5.5	3.8	346530000	30957000	26316000	18744000	0	1	0	7
B4DSB0;O95453-2;O95453-3;O95453;H3BRK1	B4DSB0;O95453-2;O95453-3;O95453;H3BRK1	2;2;2;2;1	2;2;2;2;1	2;2;2;2;1	0	12188000	0	Poly(A)-specific ribonuclease PARN	PARN	;;;;	5	2	2	2	1	1	1	1	1	1	1	1	1	5	5	5	52.988	464	464;578;593;639;261	1	10	0.00025589	2.925	2.2	2.8	2.2	76863000	7373000	11394000	6403600	0	1	0	3
B4DSJ8;Q5TCW7;O60942-3;O60942-4;O60942-2;O60942	B4DSJ8;Q5TCW7;O60942-3;O60942-4;O60942-2;O60942	3;3;3;3;3;3	3;3;3;3;3;3	3;3;3;3;3;3	0	0	15639000	mRNA-capping enzyme;Polynucleotide 5-triphosphatase;mRNA guanylyltransferase	RNGTT	;;;;;	6	3	3	3	2	2	2	2	2	2	2	2	2	8.4	8.4	8.4	59.083	514	514;541;457;541;574;597	1	20	0.00026371	3.364	5.3	5.4	6	169450000	19120000	20321000	12101000	0	0	0	4
B4DT77;P20073-2;P20073	B4DT77;P20073-2;P20073	21;21;21	21;21;21	21;21;21	1670600000	1726100000	1753600000	Annexin;Annexin A7	ANXA7	;;	3	21	21	21	18	16	17	18	16	17	18	16	17	61.6	61.6	61.6	37.805	336	336;466;488	1	288	0	120.67	56.2	51.2	54.5	20189000000	1628900000	1568000000	1909200000	16	15	14	183
B4DTG6;Q8ND56-2;Q8ND56;K7EMZ9;I3L4Q1	B4DTG6;Q8ND56-2;Q8ND56;K7EMZ9	5;5;5;4;1	5;5;5;4;1	5;5;5;4;1	90569000	74888000	91971000	Protein LSM14 homolog A	LSM14A	;;;	5	5	5	5	5	5	5	5	5	5	5	5	5	15.9	15.9	15.9	46.411	422	422;463;463;333;102	1	57	0	11.572	15.9	15.9	15.9	1101300000	96413000	78672000	91174000	1	1	0	14
B4DUX5;P50579;F8VRR3;F8VQZ7;G3XA91;G3V1U3;F8VSC4;F8VZX9;F8VY03	B4DUX5;P50579;F8VRR3;F8VQZ7;G3XA91	12;12;10;10;10;4;2;1;1	12;12;10;10;10;4;2;1;1	12;12;10;10;10;4;2;1;1	442740000	480310000	496380000	Methionine aminopeptidase 2	METAP2	;;;;	9	12	12	12	10	8	10	10	8	10	10	8	10	34.1	34.1	34.1	50.496	455	455;478;442;477;455;328;161;163;178	1	138	0	60.563	26.4	24.8	29.2	5428600000	481250000	385660000	553380000	7	7	9	75
B4DVD8;G3V169;P29466-2;P29466;H0YEC7;P29466-4;P29466-3;E9PQW1;Q5FBZ0;Q5EG05-2;Q5EG05	B4DVD8;G3V169;P29466-2;P29466;H0YEC7;P29466-4;P29466-3	3;3;3;3;2;2;2;1;1;1;1	3;3;3;3;2;2;2;1;1;1;1	3;3;3;3;2;2;2;1;1;1;1	20663000	0	0	Caspase;Caspase-1;Caspase-1 subunit p20;Caspase-1 subunit p10	CASP1	;;;;;;	11	3	3	3	2	1	1	2	1	1	2	1	1	15	15	15	33.009	301	301;367;383;404;236;263;311;95;110;97;197	1	18	0	8.6119	10	3	3	192710000	18690000	8122200	8562600	1	0	0	4
B4DVN3;E7ESC7;Q7L5Y9-3;Q7L5Y9-2;Q7L5Y9;D6RDW4;D6REW7;D6RIB6;B4DQT1;Q7L5Y9-5;Q7L5Y9-4;D6RID6;D6RE80;E7ENL1;D6RA86	B4DVN3;E7ESC7;Q7L5Y9-3;Q7L5Y9-2;Q7L5Y9;D6RDW4;D6REW7;D6RIB6;B4DQT1;Q7L5Y9-5;Q7L5Y9-4;D6RID6;D6RE80;E7ENL1	4;4;4;4;4;3;3;3;3;3;3;2;2;2;1	4;4;4;4;4;3;3;3;3;3;3;2;2;2;1	4;4;4;4;4;3;3;3;3;3;3;2;2;2;1	0	19417000	18669000	Macrophage erythroblast attacher	MAEA	;;;;;;;;;;;;;	15	4	4	4	2	3	3	2	3	3	2	3	3	11.1	11.1	11.1	45.073	395	395;434;355;360;396;245;274;328;348;245;328;115;183;317;107	1	26	0.00076007	2.821	5.6	7.6	7.6	179710000	9316800	20237000	19788000	1	0	0	5
B4DWW1;P40616;F8VYN9;B4DZG7;F8VP99;F8W1Z8;F8VP63	B4DWW1;P40616;F8VYN9;B4DZG7	6;6;5;4;1;1;1	6;6;5;4;1;1;1	6;6;5;4;1;1;1	331160000	318930000	283400000	ADP-ribosylation factor-like protein 1	ARL1	;;;	7	6	6	6	4	5	5	4	5	5	4	5	5	57.9	57.9	57.9	18.565	164	164;181;194;135;17;52;64	1	87	0	28.541	39.6	48.2	48.2	3737700000	258410000	272980000	243010000	4	6	3	65
B4DXZ6;P51114;P51114-2;E9PFF5;P51114-3;E7EU85;C9JZE0;C9JY20;C9JAJ4;C9IZ22;C9J5B4;H7C4S4	B4DXZ6;P51114;P51114-2;E9PFF5;P51114-3;E7EU85	15;15;14;12;12;11;4;4;4;2;1;1	15;15;14;12;12;11;4;4;4;2;1;1	13;13;12;10;10;9;4;4;4;2;1;1	357290000	306770000	324410000	Fragile X mental retardation syndrome-related protein 1	FXR1	;;;;;	12	15	15	13	10	12	11	10	12	11	9	10	9	33.6	33.6	30.9	68.326	608	608;621;539;490;536;454;119;123;151;94;75;246	1	135	0	46.846	24.5	28.3	25.2	3729600000	310480000	380610000	310680000	5	5	5	60
B4DZG6;Q9BTX1-6;Q9BTX1-5;Q9BTX1-2;Q9BTX1;Q9BTX1-3;Q9BTX1-4	B4DZG6;Q9BTX1-6;Q9BTX1-5;Q9BTX1-2;Q9BTX1;Q9BTX1-3	3;3;3;3;3;2;1	3;3;3;3;3;2;1	3;3;3;3;3;2;1	23957000	0	0	Nucleoporin NDC1	NDC1	;;;;;	7	3	3	3	3	0	1	3	0	1	3	0	1	13.3	13.3	13.3	37.928	339	339;559;634;673;674;557;542	1	9	0.00026867	3.5926	13.3	0	4.1	90064000	23993000	0	9776700	1	0	0	4
B4DZI8;P35606;D6RBT6;D6R997;D6RBZ7;D6RCL6;D6RBG7;H0Y938;H0YAC7	B4DZI8;P35606	38;38;6;6;5;5;5;3;2	38;38;6;6;5;5;5;3;2	38;38;6;6;5;5;5;3;2	2036200000	1999200000	2119900000	Coatomer subunit beta	COPB2	;	9	38	38	38	32	30	30	32	30	30	32	30	30	57.7	57.7	57.7	99.045	877	877;906;111;152;77;86;89;177;118	1	472	0	205.26	47.8	45.8	45.7	25002000000	2195200000	1780100000	1963100000	23	21	24	286
B4E1D7;Q9NVS9;B4E0V0;B4E152;J3QQV6	B4E1D7;Q9NVS9;B4E0V0;B4E152	6;6;5;5;2	6;6;5;5;2	6;6;5;5;2	106120000	96659000	95900000	Pyridoxine-5-phosphate oxidase	PNPO	;;;	5	6	6	6	4	4	5	4	4	5	4	4	5	35.4	35.4	35.4	27.822	243	243;261;166;218;120	1	70	0	30.081	25.5	23	26.7	1218500000	89264000	94360000	85116000	3	3	3	35
B4E1G1;Q9BUN8-2;Q9BUN8;E5RGY0	B4E1G1;Q9BUN8-2;Q9BUN8	3;3;3;1	3;3;3;1	3;3;3;1	72788000	75666000	0	Derlin-1	DERL1	;;	4	3	3	3	2	3	1	2	3	1	2	3	1	21.9	21.9	21.9	17.033	151	151;231;251;151	1	39	0	15.694	12.6	21.9	5.3	879660000	61724000	67789000	13252000	2	2	0	16
B4E1J0;F5H2F6;Q96AQ6-2;Q96AQ6;Q96AQ6-3;Q5T173	B4E1J0;F5H2F6;Q96AQ6-2;Q96AQ6;Q96AQ6-3	14;14;14;14;10;2	14;14;14;14;10;2	14;14;14;14;10;2	291360000	281150000	293080000	Pre-B-cell leukemia transcription factor-interacting protein 1	PBXIP1	;;;;	6	14	14	14	11	11	8	11	11	8	11	11	8	32.8	32.8	32.8	62.667	558	558;576;702;731;662;315	1	147	0	55.804	26.2	24.7	15.8	3745700000	270070000	262690000	231840000	4	2	3	57
B4E241;P84103	B4E241;P84103	7;7	6;6	6;6	540450000	544720000	474110000	Serine/arginine-rich splicing factor 3	SRSF3	;	2	7	6	6	6	7	5	5	6	4	5	6	4	46.8	46.8	46.8	14.203	124	124;164	1	60	0	11.357	37.1	46.8	37.1	6350400000	540710000	581530000	450120000	2	2	3	34
B4E2S7;P13473-2;P13473;P13473-3;B7Z2R9;H0YCG2	B4E2S7;P13473-2;P13473;P13473-3;B7Z2R9;H0YCG2	6;6;5;5;4;3	6;6;5;5;4;3	6;6;5;5;4;3	544110000	609940000	599080000	Lysosome-associated membrane glycoprotein 2	LAMP2	;;;;;	6	6	6	6	6	6	5	6	6	5	6	6	5	14.6	14.6	14.6	39.811	363	363;410;410;411;300;258	1	95	0	38.212	14.6	14.6	12.4	5227800000	527370000	538750000	481470000	5	3	5	57
B4E2V5;P27105;P27105-2	B4E2V5;P27105	10;10;3	10;10;3	10;10;3	1093100000	1193200000	1229000000	Erythrocyte band 7 integral membrane protein	STOM	;	3	10	10	10	9	9	10	9	9	10	9	9	10	60.3	60.3	60.3	25.964	237	237;288;123	1	159	0	147.12	57.4	56.1	60.3	14013000000	1229900000	1039700000	1309200000	7	9	10	97
B4E2X3;Q8N6R0-3;Q8N6R0;Q8N6R0-4;Q8N6R0-1;Q8N6R0-2	B4E2X3;Q8N6R0-3;Q8N6R0;Q8N6R0-4;Q8N6R0-1;Q8N6R0-2	6;6;6;5;4;3	6;6;6;5;4;3	6;6;6;5;4;3	67151000	50487000	45287000	Methyltransferase-like protein 13	METTL13	;;;;;	6	6	6	6	5	4	4	5	4	4	5	4	4	11.7	11.7	11.7	78.687	698	698;613;699;642;543;396	1	49	0	20.43	9.6	7.6	7	643890000	65118000	47151000	37855000	3	0	1	9
B5MCF9;O00541-2;O00541;B3KXD6;H7C267	B5MCF9;O00541-2;O00541;B3KXD6	7;7;7;5;1	7;7;7;5;1	7;7;7;5;1	147490000	144860000	136140000	Pescadillo homolog	PES1	;;;	5	7	7	7	5	6	6	5	6	6	5	6	6	13.7	13.7	13.7	66.077	571	571;583;588;449;194	1	62	0	6.4954	9.5	10.9	10.9	1621800000	135620000	222650000	200450000	3	3	0	15
B5MCZ3;P05231;B5MC21;B5MC14;B4DNQ5;B4DNV3;C9J5B0	B5MCZ3;P05231;B5MC21;B5MC14;B4DNQ5;B4DNV3;C9J5B0	7;7;6;5;5;4;4	7;7;6;5;5;4;4	7;7;6;5;5;4;4	86222000	80555000	60047000	Interleukin-6	IL6	;;;;;;	7	7	7	7	3	4	5	3	4	5	3	4	5	42.9	42.9	42.9	21.494	189	189;212;136;198;252;122;152	1	55	0	15.28	15.3	23.8	24.9	904500000	49656000	48914000	74231000	0	0	2	16
B5MD17;J3KS05;P83916;K7ELA4;C9JWS9	B5MD17;J3KS05;P83916;K7ELA4;C9JWS9	4;4;4;3;2	3;3;3;2;2	3;3;3;2;2	0	35677000	0	Chromobox protein homolog 1	CBX1	;;;;	5	4	3	3	3	3	2	2	2	1	2	2	1	37.5	28	28	19.325	168	168;173;185;138;110	1	21	0	4.3543	33.3	20.2	16.1	380960000	41161000	40015000	23296000	1	1	0	12
B5MDU6;Q9H6V9;Q9H6V9-2;C9JHU6;B5MCU4;Q9H6V9-4;Q9H6V9-3;C9JUM0;B5MCE2;B4DRG3	B5MDU6;Q9H6V9;Q9H6V9-2;C9JHU6;B5MCU4;Q9H6V9-4;Q9H6V9-3;C9JUM0	4;4;4;3;3;3;3;2;1;1	4;4;4;3;3;3;3;2;1;1	4;4;4;3;3;3;3;2;1;1	228960000	267370000	337310000	UPF0554 protein C2orf43	LDAH;C2orf43	;;;;;;;	10	4	4	4	3	3	3	3	3	3	3	3	3	18.9	18.9	18.9	42.668	370	370;325;331;130;240;195;277;159;146;166	1	36	0	6.7168	16.8	16.8	16.8	3288100000	248150000	164210000	324600000	1	1	1	13
B7WPF4;Q9UPU5	B7WPF4;Q9UPU5	16;16	16;16	16;16	83514000	85355000	93429000	Ubiquitin carboxyl-terminal hydrolase 24	USP24	;	2	16	16	16	9	8	7	9	8	7	9	8	7	8	8	8	277.41	2460	2460;2620	1	108	0	21.834	4.3	3.8	3.2	1046500000	81528000	63214000	71881000	2	3	5	43
B7WPG3;D6W592;Q8WVV9-5;Q8WVV9-4;Q8WVV9;H7C464;C9IYN3;Q8WVV9-3;Q8WVV9-2;H7BXH8;C9JJZ7	B7WPG3;D6W592;Q8WVV9-5;Q8WVV9-4;Q8WVV9	9;9;9;9;9;3;3;3;3;2;1	9;9;9;9;9;3;3;3;3;2;1	9;9;9;9;9;3;3;3;3;2;1	124190000	134230000	114920000	Heterogeneous nuclear ribonucleoprotein L-like	HNRNPLL;HNRPLL	;;;;	11	9	9	9	6	4	5	6	4	5	6	4	5	23.4	23.4	23.4	56.45	508	508;542;508;537;542;133;282;275;282;217;149	1	77	0	22.346	15.6	9.8	14.8	1615000000	184670000	109100000	124040000	2	1	1	24
B7Z1C4;P40123;B7Z385;E9PDI2;B7Z214;F8WEW0;F8WDB9	B7Z1C4;P40123;B7Z385;E9PDI2	10;10;8;8;3;2;2	9;9;7;7;2;2;2	9;9;7;7;2;2;2	158000000	128740000	115380000	Adenylyl cyclase-associated protein 2;Adenylyl cyclase-associated protein	CAP2	;;;	7	10	9	9	7	7	7	6	6	6	6	6	6	34.9	32.9	32.9	45.245	413	413;477;365;451;217;104;194	1	80	0	21.159	26.6	22	22.8	1708300000	161550000	118040000	112760000	3	2	1	24
B7Z2C3;P49593;B5MCT7;A8MX49;C9J2F3;C9JL74	B7Z2C3;P49593;B5MCT7;A8MX49	5;5;4;4;2;1	5;5;4;4;2;1	5;5;4;4;2;1	44557000	0	0	Protein phosphatase 1F	PPM1F	;;;	6	5	5	5	3	3	2	3	3	2	3	3	2	19.1	19.1	19.1	38.518	350	350;454;286;361;89;82	1	34	0	5.8897	9.4	12	6.6	400610000	38549000	34288000	21070000	0	0	0	3
B7Z2S5;Q16881-4;Q16881-3;Q16881;B2R5P6;E2QRB9;E9PNQ6;E7ESI6;E7EW10;Q16881-5;Q16881-2;Q16881-6;E9PIR7;Q16881-7;E9PKD3;E9PIZ5;E9PLT3;E9PKI4;E9PQI3;E9PRI8;E9PJU2	B7Z2S5;Q16881-4;Q16881-3;Q16881;B2R5P6;E2QRB9;E9PNQ6;E7ESI6;E7EW10;Q16881-5;Q16881-2;Q16881-6;E9PIR7;Q16881-7	32;32;32;32;30;30;30;30;30;30;30;30;28;25;14;8;6;6;5;2;1	32;32;32;32;30;30;30;30;30;30;30;30;28;25;14;8;6;6;5;2;1	31;31;31;31;29;29;29;29;29;29;29;29;27;24;13;7;5;5;5;2;1	6203900000	6726700000	6911600000	Thioredoxin reductase 1, cytoplasmic	TXNRD1	;;;;;;;;;;;;;	21	32	32	31	28	28	29	28	28	29	27	27	28	67.8	67.8	65.1	60.021	547	547;551;598;649;497;541;568;581;612;499;543;614;482;461;175;139;70;72;53;44;96	1	590	0	323.31	63.3	61.8	64.9	82292000000	6178800000	6460300000	6270200000	42	35	35	494
B7Z2X9;P09104;F5H0C8;F5H1C3;U3KQP4	B7Z2X9;P09104;F5H0C8	9;9;6;2;1	5;5;3;1;1	5;5;3;1;1	423190000	336230000	338340000	Gamma-enolase;Enolase	ENO2	;;	5	9	5	5	6	6	6	3	3	2	3	3	2	33	16.9	16.9	42.707	391	391;434;315;103;73	1	38	0	17.002	19.7	19.7	21.2	4505000000	61096000	32351000	27374000	2	0	1	16
B7Z358;Q8N5N7	B7Z358;Q8N5N7	4;4	4;4	4;4	83902000	60270000	45467000	39S ribosomal protein L50, mitochondrial	MRPL50	;	2	4	4	4	3	3	3	3	3	3	3	3	3	46.7	46.7	46.7	15.524	135	135;158	1	45	0	24.103	37	32.6	37	812660000	87428000	52021000	53752000	2	2	2	28
B7Z468;B7Z574;P20810-4;P20810-8;P20810;E9PCH5;P20810-2;E7ES10;E9PDE4;P20810-3;H0Y7F0;E7EQ12;E7EQA0;H0Y944;D6RBR1;D6RGF7;E7EN75;D6RAA8;D6RC54;E7EQK6	B7Z468;B7Z574;P20810-4;P20810-8;P20810;E9PCH5;P20810-2;E7ES10;E9PDE4;P20810-3;H0Y7F0;E7EQ12;E7EQA0	40;33;33;33;33;32;32;30;29;29;26;23;22;11;9;8;7;4;4;3	40;33;33;33;33;32;32;30;29;29;26;23;22;11;9;8;7;4;4;3	1;0;0;0;0;0;0;0;0;0;0;0;0;0;1;1;1;0;0;0	5299700000	5422600000	5163200000	Calpastatin	CAST	;;;;;;;;;;;;	20	40	40	1	37	38	38	37	38	38	1	1	1	61.8	61.8	1.1	80.998	754	754;694;667;686;708;673;695;642;636;590;436;423;431;288;150;149;156;78;91;156	1	716	0	323.31	59.5	61.1	60.6	65149000000	5649000000	5101900000	5174100000	37	38	37	455
B7Z4B8;Q9BUJ2-4;Q9BUJ2-2;Q9BUJ2;M0R3F1;Q9BUJ2-3;M0QYZ0;M0R0K8;M0R203;M0QZV6;M0QYI8;Q9BUJ2-5;M0QYM5	B7Z4B8;Q9BUJ2-4;Q9BUJ2-2;Q9BUJ2;M0R3F1;Q9BUJ2-3;M0QYZ0	27;27;27;27;23;23;16;5;4;4;4;4;1	27;27;27;27;23;23;16;5;4;4;4;4;1	27;27;27;27;23;23;16;5;4;4;4;4;1	1338000000	1278200000	1360300000	Heterogeneous nuclear ribonucleoprotein U-like protein 1	HNRNPUL1	;;;;;;	13	27	27	27	25	20	21	25	20	21	25	20	21	45.1	45.1	45.1	86.121	767	767;756;804;856;641;752;371;158;81;118;172;390;90	1	329	0	104.4	39.1	33.2	37.7	16089000000	1337800000	1106200000	1360700000	29	17	22	240
B7Z4K6;O00115;K7ENE5	B7Z4K6;O00115;K7ENE5	3;3;2	3;3;2	3;3;2	53579000	42328000	47756000	Deoxyribonuclease-2-alpha	DNASE2	;;	3	3	3	3	3	2	2	3	2	2	3	2	2	10.8	10.8	10.8	33.615	305	305;360;218	1	30	0	6.279	10.8	6.9	6.9	553170000	75248000	32026000	35618000	1	1	0	9
B7Z588;O14763-2;O14763	B7Z588;O14763-2;O14763	2;2;2	2;2;2	2;2;2	20500000	0	0	Tumor necrosis factor receptor superfamily member 10B	TNFRSF10B	;;	3	2	2	2	2	1	2	2	1	2	2	1	2	12.3	12.3	12.3	28.674	260	260;411;440	1	16	0	7.191	12.3	6.5	12.3	125830000	20023000	10881000	10417000	1	0	1	8
B7Z5J4;Q9UI42-2;Q9UI42	B7Z5J4;Q9UI42-2;Q9UI42	2;2;2	2;2;2	2;2;2	17305000	0	0	Carboxypeptidase A4	CPA4	;;	3	2	2	2	2	0	0	2	0	0	2	0	0	9.5	9.5	9.5	35.634	317	317;388;421	1	7	0.00026738	3.5281	9.5	0	0	51820000	17331000	0	0	1	0	0	3
B7Z5N5;Q15796-2;Q15796;K7EJX0;K7ESI8;K7EL92;K7ERC7;H3BVD1;P84022-3;P84022-2;P84022;O15198-2;O15198;H0YMP2;H0YNV1;H0YL71;H0YKE2;H3BP09;H0YAK7;F5GWU7;P84022-4;Q99717;Q15797	B7Z5N5;Q15796-2;Q15796;K7EJX0	5;5;5;4;2;2;2;2;2;2;2;2;2;1;1;1;1;1;1;1;1;1;1	5;5;5;4;2;2;2;2;2;2;2;2;2;1;1;1;1;1;1;1;1;1;1	5;5;5;4;2;2;2;2;2;2;2;2;2;1;1;1;1;1;1;1;1;1;1	134330000	125760000	57203000	Mothers against decapentaplegic homolog;Mothers against decapentaplegic homolog 2	SMAD2	;;;	23	5	5	5	4	4	4	4	4	4	4	4	4	13.5	13.5	13.5	48.669	431	431;437;467;217;108;109;137;213;320;381;425;430;467;63;84;92;112;114;174;464;230;465;465	1	60	0	10.457	10.7	10.7	10.7	1464100000	145370000	120630000	63899000	1	1	0	20
B7Z6B8;Q16698;E5RFV2;E5RJG7;E5RJD2;E5RID6;H0YAW3	B7Z6B8;Q16698;E5RFV2	12;12;6;5;3;2;1	12;12;6;5;3;2;1	12;12;6;5;3;2;1	496050000	618010000	501950000	2,4-dienoyl-CoA reductase, mitochondrial	DECR1	;;	7	12	12	12	9	8	10	9	8	10	9	8	10	44.2	44.2	44.2	34.994	326	326;335;205;181;151;95;43	1	132	0	80.485	35.6	23.3	32.8	6659500000	518430000	404190000	487180000	9	7	7	93
B7Z6Q6;Q99661;Q5JR91;B7Z7M6;Q99661-2;Q5JR89	B7Z6Q6;Q99661;Q5JR91;B7Z7M6;Q99661-2	4;4;3;3;3;1	4;4;3;3;3;1	4;4;3;3;3;1	35551000	0	50992000	Kinesin-like protein;Kinesin-like protein KIF2C	KIF2C	;;;;	6	4	4	4	4	3	3	4	3	3	4	3	3	5.7	5.7	5.7	76.982	684	684;725;336;612;671;287	1	32	0	5.1382	5.7	3.8	4.5	470110000	51379000	41903000	41194000	0	0	1	5
B7Z7A3;Q9BZE4;B4DY13;Q5T3R7	B7Z7A3;Q9BZE4;B4DY13;Q5T3R7	8;8;5;4	8;8;5;4	8;8;5;4	58671000	64455000	61595000	Nucleolar GTP-binding protein 1	GTPBP4	;;;	4	8	8	8	6	7	6	6	7	6	6	7	6	15	15	15	68.272	587	587;634;518;140	1	68	0	11.531	11.9	12.6	10.7	810470000	96293000	81699000	63774000	0	2	1	21
B7Z7F3;Q9H6Z4-3;Q9H6Z4-2;Q9H6Z4;F5H4C2;K7EIJ4;K7EJV3;K7ENJ2;K7EID7;K7ENB9;K7EPW1;K7ESQ0;K7EN31	B7Z7F3;Q9H6Z4-3;Q9H6Z4-2;Q9H6Z4;F5H4C2;K7EIJ4	9;9;9;9;8;5;2;1;1;1;1;1;1	9;9;9;9;8;5;2;1;1;1;1;1;1	9;9;9;9;8;5;2;1;1;1;1;1;1	133300000	110300000	97784000	Ran-binding protein 3	RANBP3	;;;;;	13	9	9	9	8	5	7	8	5	7	8	5	7	23.9	23.9	23.9	52.894	494	494;499;562;567;439;155;174;62;73;74;108;122;171	1	79	0	20.661	22.1	13.4	18.2	1537500000	141000000	97479000	99897000	5	2	3	43
B7Z817;Q15392;F5H0H1;H7C4B7	B7Z817;Q15392;F5H0H1	16;16;10;7	16;16;10;7	16;16;10;7	652790000	687490000	754110000	Delta(24)-sterol reductase	DHCR24	;;	4	16	16	16	14	9	13	14	9	13	14	9	13	35.4	35.4	35.4	54.75	475	475;516;300;154	1	173	0	48.278	29.9	21.1	29.5	9005700000	816880000	477260000	743920000	7	8	7	80
B7Z9I3;O75787;H0Y750;B7Z1I9;B7Z413;H7C3E1;H7C240	B7Z9I3;O75787;H0Y750;B7Z1I9;B7Z413;H7C3E1	6;6;5;5;5;4;2	6;6;5;5;5;4;2	6;6;5;5;5;4;2	80425000	98102000	84380000	Renin receptor	ATP6AP2	;;;;;	7	6	6	6	4	4	5	4	4	5	4	4	5	27.4	27.4	27.4	35.612	318	318;350;243;272;274;259;203	1	56	0	30.1	18.6	14.5	20.8	1113400000	86276000	104000000	63330000	3	2	3	35
B7Z9S8;A6NGH2;P05026-2;P05026;V9GYR2	B7Z9S8;A6NGH2;P05026-2;P05026;V9GYR2	8;8;8;8;5	8;8;8;8;5	8;8;8;8;5	333110000	366800000	382660000	Sodium/potassium-transporting ATPase subunit beta-1	ATP1B1	;;;;	5	8	8	8	7	6	5	7	6	5	7	6	5	39.3	39.3	39.3	28.627	247	247;295;301;303;130	1	109	0	32.56	34.8	34	23.9	4526400000	330940000	334820000	339380000	5	4	4	79
B7ZC38;Q9NR46;Q9NR46-2;B7ZC39;F8WFB9;G5E9J1;H7C1Z6	B7ZC38;Q9NR46;Q9NR46-2;B7ZC39	14;14;14;13;5;1;1	14;14;14;13;5;1;1	13;13;13;12;4;1;1	398960000	433350000	429310000	Endophilin-B2	SH3GLB2	;;;	7	14	14	13	11	11	11	11	11	11	10	10	10	44.2	44.2	42.2	44.361	400	400;395;404;374;127;24;59	1	171	0	84.065	31.8	28.5	33.2	5392600000	415760000	386170000	415140000	3	5	7	70
B7ZKQ9;Q8WTV0-4;Q8WTV0-2;Q8WTV0-3;F5H4X0;B3KW46;B4DZ71;Q8WTV0-5;Q8WTV0;F5H5E8	B7ZKQ9;Q8WTV0-4;Q8WTV0-2;Q8WTV0-3;F5H4X0;B3KW46;B4DZ71;Q8WTV0-5;Q8WTV0	10;10;10;9;8;8;8;8;8;1	10;10;10;9;8;8;8;8;8;1	10;10;10;9;8;8;8;8;8;1	236220000	208420000	230550000	Scavenger receptor class B member 1	SCARB1	;;;;;;;;	10	10	10	10	7	7	9	7	7	9	7	7	9	21.8	21.8	21.8	53.847	481	481;474;509;409;499;512;516;506;552;146	1	100	0	23.679	15.4	15.8	20	2686600000	200070000	138630000	275850000	3	3	4	35
B7ZLM8;P30047;H0YNM1;H0YNX7	B7ZLM8;P30047;H0YNM1;H0YNX7	2;2;1;1	2;2;1;1	2;2;1;1	0	0	25080000	GTP cyclohydrolase 1 feedback regulatory protein	GCHFR	;;;	4	2	2	2	1	2	2	1	2	2	1	2	2	35.6	35.6	35.6	8.5549	73	73;84;44;67	1	17	0	5.5537	21.9	35.6	35.6	207070000	11522000	22995000	23444000	1	1	0	5
B8ZZD4;Q86VP1-3;Q86VP1-4;Q86VP1-2;Q86VP1;H7C3L5	B8ZZD4;Q86VP1-3;Q86VP1-4;Q86VP1-2;Q86VP1	5;5;5;5;5;1	5;5;5;5;5;1	5;5;5;5;5;1	50169000	48312000	0	Tax1-binding protein 1	TAX1BP1	;;;;	6	5	5	5	2	3	1	2	3	1	2	3	1	6.4	6.4	6.4	93.609	813	813;563;590;747;789;326	1	34	0	4.3669	3	3.3	1.2	470520000	36650000	39732000	14743000	1	2	0	9
B8ZZN6;P63165;B8ZZ67;P63165-2;B8ZZJ0;B9A032	B8ZZN6;P63165;B8ZZ67;P63165-2	5;5;3;3;2;2	5;5;3;3;2;2	5;5;3;3;2;2	272890000	287670000	269750000	Small ubiquitin-related modifier 1	SUMO1	;;;	6	5	5	5	5	4	4	5	4	4	5	4	4	35.6	35.6	35.6	16.645	146	146;101;62;76;58;77	1	57	0	12.901	35.6	30.8	30.8	3484800000	285100000	216310000	196290000	1	1	2	22
B8ZZQ6;P06454-2;P06454;B8ZZA1;B8ZZW7;H7C2N1	B8ZZQ6;P06454-2;P06454;B8ZZA1;B8ZZW7;H7C2N1	7;7;7;6;6;6	7;7;7;6;6;6	7;7;7;6;6;6	2323300000	2748900000	2565900000	Prothymosin alpha;Prothymosin alpha, N-terminally processed;Thymosin alpha-1	PTMA	;;;;;	6	7	7	7	7	7	7	7	7	7	7	7	7	37.4	37.4	37.4	11.758	107	107;110;111;131;136;148	1	155	0	133.89	37.4	37.4	37.4	30189000000	2646700000	2497500000	2656200000	13	13	11	157
B8ZZS4;Q9H8Y5	B8ZZS4;Q9H8Y5	5;5	5;5	5;5	45103000	0	0	Ankyrin repeat and zinc finger domain-containing protein 1	ANKZF1	;	2	5	5	5	3	2	1	3	2	1	3	2	1	15.9	15.9	15.9	57.572	516	516;726	1	29	0	19.577	9.9	7.8	2.9	381110000	45960000	30588000	18846000	2	0	0	13
B9A008;E7ENR5;B8ZZ47;H0Y714;Q96G21	B9A008;E7ENR5;B8ZZ47;H0Y714;Q96G21	1;1;1;1;1	1;1;1;1;1	1;1;1;1;1	0	0	10482000	U3 small nucleolar ribonucleoprotein protein IMP4	IMP4	;;;;	5	1	1	1	0	1	1	0	1	1	0	1	1	8.1	8.1	8.1	19.619	172	172;236;248;280;291	1	5	0.0036014	2.2184	0	8.1	8.1	53906000	0	8089700	9798400	0	1	1	2
B9TX62;F5GY88;O75448-2;O75448;H0YEG1	B9TX62;F5GY88;O75448-2;O75448;H0YEG1	2;2;2;2;1	2;2;2;2;1	2;2;2;2;1	0	0	181850000	Mediator of RNA polymerase II transcription subunit 24	MED24	;;;;	5	2	2	2	1	1	2	1	1	2	1	1	2	12.3	12.3	12.3	32.221	292	292;1008;976;989;84	1	10	0	7.3776	4.8	4.8	12.3	225570000	6376200	6597500	169990000	0	0	1	1
B9ZVX0;E9PHQ0;E7ET75;E9PEZ3;H9KV28;O60610-2;O60610-3;O60610;E7ERW8;E7EMV0;B4E2I7;E5RJ79	B9ZVX0;E9PHQ0;E7ET75;E9PEZ3;H9KV28;O60610-2;O60610-3;O60610;E7ERW8;E7EMV0	40;40;40;40;40;40;40;40;39;22;4;1	40;40;40;40;40;40;40;40;39;22;4;1	40;40;40;40;40;40;40;40;39;22;4;1	1166500000	1205400000	1165600000	Protein diaphanous homolog 1	DIAPH1	;;;;;;;;;	12	40	40	40	33	28	29	33	28	29	33	28	29	39.7	39.7	39.7	138.93	1248	1248;1260;1264;1269;1273;1248;1263;1272;1215;863;201;112	1	475	0	230.67	32.8	26.7	28.4	14403000000	1461000000	1085400000	1123500000	21	15	16	232
C9J050;C9JEJ2;P49585;C9JPY0;H7C1T3;C9J2E1;C9JVS0;F8WAZ5;F2Z2B1	C9J050;C9JEJ2;P49585;C9JPY0;H7C1T3;C9J2E1	3;3;3;2;2;2;1;1;1	3;3;3;2;2;2;1;1;1	2;2;2;1;1;1;0;0;0	0	123710000	0	Choline-phosphate cytidylyltransferase A	PCYT1A	;;;;;	9	3	3	2	1	3	2	1	3	2	0	2	2	11.3	11.3	5.8	33.711	293	293;380;367;133;201;212;115;134;177	1	24	0.0019856	2.5963	5.5	11.3	5.8	554520000	7236600	115650000	17781000	1	0	0	6
C9J0G0;Q99424;H7C4Q2;C9JY29	C9J0G0;Q99424;H7C4Q2;C9JY29	2;2;1;1	2;2;1;1	2;2;1;1	0	83415000	0	Acyl-coenzyme A oxidase;Peroxisomal acyl-coenzyme A oxidase 2	ACOX2	;;;	4	2	2	2	2	2	2	2	2	2	2	2	2	3.3	3.3	3.3	75.141	667	667;681;93;171	1	26	0.0084862	1.7552	3.3	3.3	3.3	723380000	15719000	72800000	159540000	0	1	1	3
C9J0I9;Q86WB0-3;Q86WB0-2;Q86WB0	C9J0I9;Q86WB0-3;Q86WB0-2;Q86WB0	5;5;5;5	5;5;5;5	5;5;5;5	45318000	37913000	34902000	Nuclear-interacting partner of ALK	ZC3HC1	;;;	4	5	5	5	4	4	2	4	4	2	4	4	2	13.7	13.7	13.7	50.562	459	459;431;481;502	1	46	0	6.791	10.2	10.5	5.7	538560000	52131000	55589000	21384000	0	2	2	18
C9J0K6;P30626-3;P30626-2;P30626;B4DHQ6	C9J0K6;P30626-3;P30626-2;P30626;B4DHQ6	8;8;8;8;4	8;8;8;8;4	8;8;8;8;4	342390000	369100000	390830000	Sorcin	SRI	;;;;	5	8	8	8	6	7	7	6	7	7	6	7	7	51	51	51	17.605	155	155;180;183;198;158	1	90	0	22.899	36.8	43.9	43.2	4870800000	368750000	443270000	407120000	3	5	5	44
C9J236;C9JS27;Q7L592-2;Q7L592	C9J236;C9JS27;Q7L592-2;Q7L592	1;1;1;1	1;1;1;1	1;1;1;1	0	0	17405000	NADH dehydrogenase [ubiquinone] complex I, assembly factor 7	NDUFAF7	;;;	4	1	1	1	0	0	1	0	0	1	0	0	1	8.7	8.7	8.7	25.414	230	230;267;343;441	1	5	0.0017597	2.716	0	0	8.7	77045000	0	0	16270000	0	0	0	1
C9J2G3;C9JQQ2;Q9NWU1-2;Q9NWU1;F8VNS3	C9J2G3;C9JQQ2;Q9NWU1-2;Q9NWU1;F8VNS3	2;2;2;2;1	2;2;2;2;1	2;2;2;2;1	28639000	28698000	27044000	3-oxoacyl-[acyl-carrier-protein] synthase, mitochondrial	OXSM	;;;;	5	2	2	2	2	2	2	2	2	2	2	2	2	16.8	16.8	16.8	23.632	220	220;231;376;459;102	1	21	0	6.2101	16.8	16.8	16.8	293300000	28497000	26941000	24519000	1	2	1	14
C9J4M6;C9J2Y9;P30876	C9J4M6;C9J2Y9;P30876	8;8;8	8;8;8	8;8;8	66188000	62051000	73739000	DNA-directed RNA polymerase;DNA-directed RNA polymerase II subunit RPB2	POLR2B	;;	3	8	8	8	4	5	6	4	5	6	4	5	6	8.7	8.7	8.7	125.19	1099	1099;1167;1174	1	61	0	13.996	5	5.7	6.6	804270000	48048000	55178000	83336000	0	1	2	17
C9J4Z3;P61513;M0R0A1;Q6P4E4;E9PEL3;M0R2L6;G5E9R3;A6NKH3	C9J4Z3;P61513;M0R0A1;Q6P4E4;E9PEL3;M0R2L6;G5E9R3	5;5;4;4;4;4;3;1	5;5;4;4;4;4;3;1	5;5;4;4;4;4;3;1	895830000	1025300000	667550000	60S ribosomal protein L37a	RPL37A	;;;;;;	8	5	5	5	5	5	4	5	5	4	5	5	4	69.1	69.1	69.1	7.624	68	68;92;60;72;75;88;58;93	1	102	0	96.421	69.1	69.1	69.1	11698000000	1012500000	1029900000	668690000	5	5	4	71
C9J5N1;Q9BTE6;Q9BTE6-2;Q9BTE6-3;K7EQ85;L7N2F4	C9J5N1;Q9BTE6;Q9BTE6-2;Q9BTE6-3;K7EQ85	4;4;4;4;3;1	4;4;4;4;3;1	4;4;4;4;3;1	29240000	23730000	0	Alanyl-tRNA editing protein Aarsd1	PTGES3L-AARSD1;AARSD1	;;;;	6	4	4	4	4	2	0	4	2	0	4	2	0	10.1	10.1	10.1	55.065	495	495;412;525;586;94;140	1	32	0	5.2951	10.1	3.4	0	290460000	32104000	16879000	0	3	0	0	18
C9J6N5;C9JQ40;C9JW51;Q9H098;C9J3Q3;Q9H098-2;X6RET8;C9JP05;C9JYP1;C9J6Y8;F8WCJ2	C9J6N5;C9JQ40;C9JW51;Q9H098;C9J3Q3;Q9H098-2;X6RET8;C9JP05	5;5;5;5;4;4;3;3;2;2;1	5;5;5;5;4;4;3;3;2;2;1	5;5;5;5;4;4;3;3;2;2;1	0	0	98089000	Protein FAM107B	FAM107B	;;;;;;;	11	5	5	5	2	3	3	2	3	3	2	3	3	49.2	49.2	49.2	14.844	124	124;126;128;131;101;306;90;93;67;84;51	1	45	0	8.8687	24.2	30.6	34.7	1023700000	65555000	66716000	122640000	0	0	1	15
C9J712;P35080;C9JQ45;C9J2N0	C9J712;P35080;C9JQ45;C9J2N0	5;5;3;3	5;5;3;3	2;2;0;1	221070000	259910000	229090000	Profilin-2;Profilin	PFN2	;;;	4	5	5	2	5	4	5	5	4	5	2	2	2	64.8	64.8	19.8	9.7982	91	91;140;110;125	1	70	0	30.629	64.8	49.5	64.8	2915800000	308180000	175560000	308490000	3	5	4	42
C9J7K9;O15162-2;O15162;H7C5I5;C9J9P4;C9J0H3;C9JE06	C9J7K9;O15162-2;O15162;H7C5I5;C9J9P4	5;5;5;4;3;2;2	5;5;5;4;3;2;2	5;5;5;4;3;2;2	351870000	341210000	345400000	Phospholipid scramblase 1	PLSCR1	;;;;	7	5	5	5	5	4	4	5	4	4	5	4	4	18.3	18.3	18.3	34.217	311	311;237;318;171;248;171;249	1	65	0	24.66	18.3	15.1	16.1	4265800000	398380000	340130000	221430000	1	3	1	22
C9J8Q1;F8W9P7;H7C537;Q9UMS0-2;Q9UMS0-3;Q9UMS0	C9J8Q1;F8W9P7;H7C537;Q9UMS0-2;Q9UMS0-3;Q9UMS0	1;1;1;1;1;1	1;1;1;1;1;1	1;1;1;1;1;1	50758000	34690000	50735000	NFU1 iron-sulfur cluster scaffold homolog, mitochondrial	NFU1	;;;;;	6	1	1	1	1	1	1	1	1	1	1	1	1	15.6	15.6	15.6	10.443	96	96;99;126;113;230;254	1	24	0.00050826	2.8694	15.6	15.6	15.6	528580000	51752000	33164000	46075000	2	1	1	20
C9J8T0;P57772	C9J8T0;P57772	4;4	4;4	4;4	46721000	44149000	44116000	Selenocysteine-specific elongation factor	EEFSEC	;	2	4	4	4	4	4	3	4	4	3	4	4	3	11	11	11	47.876	436	436;596	1	42	0	5.7994	11	11	7.8	539150000	65970000	68618000	34773000	1	1	0	14
C9J8T6;Q14061;H7C4E5	C9J8T6;Q14061;H7C4E5	2;2;1	2;2;1	2;2;1	0	46115000	0	Cytochrome c oxidase copper chaperone	COX17	;;	3	2	2	2	2	2	1	2	2	1	2	2	1	29.6	29.6	29.6	10.853	98	98;63;58	1	22	0	10.935	29.6	29.6	16.3	486230000	41186000	44592000	22358000	0	1	0	9
C9J9K3;P08865;A6NE09;C9JQR9	C9J9K3;P08865;A6NE09	15;15;13;4	15;15;13;4	15;15;13;4	8117500000	8666400000	8433000000	40S ribosomal protein SA	RPSA;RPSAP58	;;	4	15	15	15	15	15	14	15	15	14	15	15	14	70	70	70	29.404	263	263;295;295;73	1	366	0	323.31	70	70	67.7	101650000000	8495500000	8156300000	8113000000	28	24	20	278
C9JA08;Q96D46;C9J0B9;C9IZW9;C9K0C2;C9IY70	C9JA08;Q96D46	10;10;3;2;2;1	10;10;3;2;2;1	10;10;3;2;2;1	140940000	151720000	165520000	60S ribosomal export protein NMD3	NMD3	;	6	10	10	10	7	5	6	7	5	6	7	5	6	31.4	31.4	31.4	60.125	529	529;503;218;155;162;98	1	89	0	23.179	24	15.1	17.4	1944300000	148760000	117300000	130820000	5	2	5	46
C9JA28;Q9UNL2;B4E2P2;C9J365	C9JA28;Q9UNL2;B4E2P2;C9J365	2;2;2;1	2;2;2;1	2;2;2;1	445250000	598430000	641880000	Translocon-associated protein subunit gamma	SSR3	;;;	4	2	2	2	2	2	2	2	2	2	2	2	2	12.6	12.6	12.6	20.161	174	174;185;198;133	1	35	0	22.868	12.6	12.6	12.6	5797700000	465470000	546250000	491930000	2	2	2	25
C9JAB2;Q16629-3;Q16629-2;Q16629-4;Q16629;F8WEA1	C9JAB2;Q16629-3;Q16629-2;Q16629-4;Q16629	8;8;8;8;8;3	8;8;8;8;8;3	7;7;7;7;7;3	1107800000	1283100000	1200700000	Serine/arginine-rich splicing factor 7	SRSF7	;;;;	6	8	8	7	7	7	8	7	7	8	6	6	7	31.9	31.9	31.9	26.928	235	235;132;135;226;238;51	1	136	0	33.443	28.1	28.1	31.9	14011000000	1170700000	1177600000	1180000000	8	8	10	91
C9JAG1;Q9C0D9	C9JAG1;Q9C0D9	2;2	2;2	2;2	0	0	79065000	Ethanolaminephosphotransferase 1	EPT1	;	2	2	2	2	1	0	2	1	0	2	1	0	2	21.7	21.7	21.7	20.557	180	180;397	1	15	0	14.786	12.8	0	21.7	385680000	20437000	0	75458000	1	0	0	9
C9JAW5;C9JNU6;Q9Y241;A8MV81;Q9Y241-2	C9JAW5;C9JNU6;Q9Y241;A8MV81;Q9Y241-2	2;2;2;1;1	2;2;2;1;1	2;2;2;1;1	47226000	0	0	HIG1 domain family member 1A, mitochondrial;HIG1 domain family member 1C	HIGD1A;HIGD1C	;;;;	5	2	2	2	2	1	1	2	1	1	2	1	1	32.5	32.5	32.5	8.8131	83	83;96;93;97;107	1	20	0	28.755	32.5	21.7	21.7	483390000	46707000	20904000	23604000	2	1	2	21
C9JB30;Q9UPY8-2;Q9UPY8	C9JB30;Q9UPY8-2;Q9UPY8	4;4;4	2;2;2	2;2;2	21602000	0	0	Microtubule-associated protein RP/EB family member 3	MAPRE3	;;	3	4	2	2	4	2	2	2	0	0	2	0	0	23.9	15.1	15.1	24.582	218	218;266;281	1	8	0.00026504	3.4239	23.9	8.7	8.7	97535000	19747000	0	0	1	0	0	2
C9JC60;G5E977;Q6XQN6;Q6XQN6-2;C9J8U2;Q6XQN6-3;H0YF31;H0YDA6	C9JC60;G5E977;Q6XQN6;Q6XQN6-2;C9J8U2;Q6XQN6-3	12;12;12;12;10;10;3;1	12;12;12;12;10;10;3;1	12;12;12;12;10;10;3;1	233430000	252260000	256030000	Nicotinate phosphoribosyltransferase	NAPRT	;;;;;	8	12	12	12	10	8	8	10	8	8	10	8	8	36.6	36.6	36.6	60.234	566	566;584;538;567;490;525;163;128	1	114	0	51.968	30	23.9	19.1	2826300000	247670000	183100000	182430000	3	2	3	48
C9JCC6;Q14919;Q14919-2;E9PQX9;E9PNC7;E9PMW2	C9JCC6;Q14919;Q14919-2;E9PQX9	5;5;5;4;2;1	5;5;5;4;2;1	5;5;5;4;2;1	202990000	214550000	201210000	Dr1-associated corepressor	DRAP1	;;;	6	5	5	5	4	4	4	4	4	4	4	4	4	24.5	24.5	24.5	23.205	212	212;205;211;185;155;161	1	50	0	9.0943	24.1	24.1	24.1	2506200000	194860000	208830000	199780000	2	3	3	36
C9JCN8;P15408-3;P15408;P15408-2	C9JCN8;P15408-3;P15408;P15408-2	3;3;3;2	3;3;3;2	3;3;3;2	0	0	42717000	Fos-related antigen 2	FOSL2	;;;	4	3	3	3	1	2	2	1	2	2	1	2	2	25.2	25.2	25.2	22.254	202	202;287;326;318	1	21	0	7.4606	8.9	19.3	19.3	402610000	15915000	30666000	32494000	0	0	1	8
C9JDG0;Q9NSV4-7;Q9NSV4-6;Q9NSV4-5;Q9NSV4-4;Q9NSV4;Q9NSV4-2;Q9NSV4-1	C9JDG0;Q9NSV4-7;Q9NSV4-6;Q9NSV4-5;Q9NSV4-4;Q9NSV4;Q9NSV4-2;Q9NSV4-1	7;7;7;7;7;7;4;4	7;7;7;7;7;7;4;4	7;7;7;7;7;7;4;4	63751000	74654000	70724000	Protein diaphanous homolog 3	DIAPH3	;;;;;;;	8	7	7	7	4	5	6	4	5	6	4	5	6	7.2	7.2	7.2	136.88	1193	1193;1112;1123;1147;1182;1193;691;849	1	64	0	13.256	4.2	4.4	6.1	877120000	49238000	81056000	93174000	1	2	3	22
C9JFE4;Q13098-5;Q13098;Q13098-7;Q13098-6;J3KSA5;J3QLT0;J3KRJ4;J3QS88;J3KTB0;J3QQX0;J3QS84;J3QLE8;J3QL53;J3KRE8	C9JFE4;Q13098-5;Q13098;Q13098-7;Q13098-6	16;16;16;16;11;7;5;5;4;4;3;3;3;3;3	16;16;16;16;11;7;5;5;4;4;3;3;3;3;3	16;16;16;16;11;7;5;5;4;4;3;3;3;3;3	534770000	514380000	486390000	COP9 signalosome complex subunit 1	GPS1	;;;;	15	16	16	16	14	10	12	14	10	12	14	10	12	48.2	48.2	48.2	53.371	471	471;487;491;527;549;210;168;253;134;139;79;101;166;168;186	1	190	0	88.385	45.6	33.3	35.2	6320000000	599890000	371830000	421830000	9	6	6	80
C9JFV4;Q8IZL8;I3L3A8;F8WDZ1;I3L4M7;I3L445;E7EV54;I3L1P4	C9JFV4;Q8IZL8;I3L3A8;F8WDZ1	10;10;9;8;4;4;4;3	10;10;9;8;4;4;4;3	10;10;9;8;4;4;4;3	81059000	103840000	79949000	Proline-, glutamic acid- and leucine-rich protein 1	PELP1	;;;	8	10	10	10	8	7	4	8	7	4	8	7	4	14.8	14.8	14.8	135.51	1274	1274;1130;1180;1040;151;301;906;148	1	89	0	29.432	11.4	9.3	4.6	983720000	86431000	112200000	52876000	4	2	0	37
C9JG87;Q9NYK5;Q9NYK5-2	C9JG87;Q9NYK5;Q9NYK5-2	5;5;5	5;5;5	5;5;5	76945000	85379000	92384000	39S ribosomal protein L39, mitochondrial	MRPL39	;;	3	5	5	5	5	3	3	5	3	3	5	3	3	20.5	20.5	20.5	34.032	297	297;338;353	1	45	0	12.329	20.5	13.8	13.8	954890000	100710000	72902000	82486000	4	1	1	19
C9JG97;C9JEH3;Q13685;C9JTS3;H7C0R2	C9JG97;C9JEH3;Q13685;C9JTS3	6;6;6;4;2	6;6;6;4;2	6;6;6;4;2	78838000	74469000	62589000	Angio-associated migratory cell protein	AAMP	;;;	5	6	6	6	6	6	4	6	6	4	6	6	4	21.2	21.2	21.2	44.693	415	415;435;434;200;189	1	59	0	10.957	21.2	21.2	12	1031600000	101560000	76836000	51250000	1	2	1	18
C9JIF9;P13798;H7C393;H7C1U0;C9JLK2;F8WEH5	C9JIF9;P13798	18;18;8;7;4;2	18;18;8;7;4;2	18;18;8;7;4;2	543990000	492220000	528270000	Acylamino-acid-releasing enzyme	APEH	;	6	18	18	18	15	13	11	15	13	11	15	13	11	37.2	37.2	37.2	81.673	737	737;732;284;308;232;50	1	195	0	78.863	34.9	27.3	23.3	6488400000	579970000	517030000	478490000	11	5	6	108
C9JIZ6;B1AVU8;P07602;P07602-2;P07602-3	C9JIZ6;B1AVU8;P07602;P07602-2;P07602-3	17;17;17;17;17	17;17;17;17;17	17;17;17;17;17	1215800000	1422600000	1319900000	Prosaposin;Saposin-A;Saposin-B-Val;Saposin-B;Saposin-C;Saposin-D	PSAP	;;;;	5	17	17	17	14	13	14	14	13	14	14	13	14	33.3	33.3	33.3	58.353	526	526;559;524;526;527	1	191	0	26.242	24.3	24.7	24.3	14775000000	1326500000	1392300000	1225600000	8	8	5	91
C9JJ19;P82930	C9JJ19;P82930	9;9	9;9	9;9	136220000	153880000	137540000	28S ribosomal protein S34, mitochondrial	MRPS34	;	2	9	9	9	6	6	5	6	6	5	6	6	5	48.9	48.9	48.9	26.332	225	225;218	1	70	0	9.338	33.8	31.6	21.8	1560500000	143460000	148920000	124870000	4	2	3	37
C9JLU1;P52434;P52434-3;P52434-4;P52434-2;P52434-5	C9JLU1;P52434;P52434-3;P52434-4;P52434-2	4;4;3;3;2;1	4;4;3;3;2;1	4;4;3;3;2;1	81636000	70213000	79687000	DNA-directed RNA polymerases I, II, and III subunit RPABC3	POLR2H	;;;;	6	4	4	4	2	2	2	2	2	2	2	2	2	35.1	35.1	35.1	16.925	148	148;150;114;175;122;86	1	31	0	7.6133	19.6	19.6	19.6	986600000	101620000	58413000	67854000	1	2	2	16
C9JME2;Q9Y4F1;Q9Y4F1-2;M0QYB0;H0Y783;M0QXT1;M0R262;Q9Y4F1-3	C9JME2;Q9Y4F1;Q9Y4F1-2	8;8;8;3;2;2;1;1	8;8;8;3;2;2;1;1	8;8;8;3;2;2;1;1	39531000	45641000	47678000	FERM, RhoGEF and pleckstrin domain-containing protein 1	FARP1	;;	8	8	8	8	5	3	4	5	3	4	5	3	4	10.9	10.9	10.9	122.09	1076	1076;1045;1076;203;215;248;171;129	1	45	0	9.9514	7	3.7	4.6	490040000	50631000	31902000	64512000	1	1	1	13
C9JNK6;O75431-2;O75431;C9JAZ1	C9JNK6;O75431-2;O75431;C9JAZ1	3;3;3;2	3;3;3;2	3;3;3;2	82359000	107870000	123290000	Metaxin-2	MTX2	;;;	4	3	3	3	2	1	3	2	1	3	2	1	3	21.7	21.7	21.7	23.643	207	207;253;263;229	1	51	0	16.05	16.9	6.3	21.7	1244500000	73864000	65166000	141550000	3	2	3	35
C9JNW5;P83731;C9JXB8	C9JNW5;P83731;C9JXB8	10;10;9	10;10;9	10;10;9	2480200000	2516100000	2434900000	60S ribosomal protein L24	RPL24	;;	3	10	10	10	8	9	8	8	9	8	8	9	8	52.7	52.7	52.7	17.542	150	150;157;121	1	170	0	31.782	41.3	46	46	30981000000	2616900000	1809000000	1989600000	8	6	6	87
C9JP00;Q9NR56;Q9NR56-3;Q9NR56-4;Q9NR56-7;Q9NR56-6;Q9NR56-2;Q9NR56-5;H7C4T5;O95205;Q86VM6;Q5VZF2-3;Q5VZF2-2;Q5VZF2;C9JCX1;B4E3F7;H7C4Y1	C9JP00;Q9NR56;Q9NR56-3;Q9NR56-4;Q9NR56-7;Q9NR56-6;Q9NR56-2;Q9NR56-5;H7C4T5;O95205;Q86VM6;Q5VZF2-3;Q5VZF2-2;Q5VZF2	6;6;5;5;5;5;5;5;4;3;3;3;3;3;2;2;2	6;6;5;5;5;5;5;5;4;3;3;3;3;3;2;2;2	6;6;5;5;5;5;5;5;4;3;3;3;3;3;2;2;2	243370000	124420000	181110000	Muscleblind-like protein 1;Muscleblind-like protein 2	MBNL1;MBLL;MBNL2	;;;;;;;;;;;;;	17	6	6	6	4	5	4	4	5	4	4	5	4	23.6	23.6	23.6	37.898	348	348;388;302;314;340;342;370;382;329;255;343;361;367;373;155;206;210	1	58	0	10.214	15.2	21	14.1	2017700000	235430000	97897000	195130000	3	4	1	23
C9JQ41;H7C525;Q4VC31	C9JQ41;H7C525;Q4VC31	3;3;3	3;3;3	3;3;3	49925000	0	0	Coiled-coil domain-containing protein 58	CCDC58	;;	3	3	3	3	3	2	1	3	2	1	3	2	1	21.5	21.5	21.5	15.296	130	130;141;144	1	27	0.00027012	3.6801	21.5	14.6	6.9	545010000	62190000	48642000	12288000	1	0	1	11
C9JQV0;Q9BRJ6;H7C0T1;H7C2R9	C9JQV0;Q9BRJ6	3;3;1;1	3;3;1;1	3;3;1;1	88764000	93371000	100900000	Uncharacterized protein C7orf50	C7orf50	;	4	3	3	3	3	3	3	3	3	3	3	3	3	29.7	29.7	29.7	21.883	192	192;194;162;179	1	37	0	7.7894	29.7	29.7	29.7	1140200000	96341000	90159000	95364000	1	0	1	15
C9JRL4	C9JRL4	7	1	1	691090000	0	0		MDH1		1	7	1	1	7	5	6	1	0	0	1	0	0	72.3	16.8	16.8	12.973	119	119	1	8	0	138.64	72.3	49.6	55.5	2050300000	693740000	0	0	2	0	0	7
C9JRZ6;Q9NX63;F8WAR4;G3V1K1;F8WD73	C9JRZ6;Q9NX63;F8WAR4;G3V1K1	12;12;8;6;2	12;12;8;6;2	12;12;8;6;2	706220000	590430000	620550000	MICOS complex subunit MIC19	CHCHD3	;;;	5	12	12	12	9	9	10	9	9	10	9	9	10	51.3	51.3	51.3	26.694	232	232;227;241;138;63	1	133	0	46.904	37.5	37.1	40.9	7350900000	624530000	370350000	600540000	5	6	8	74
C9JS50;Q687X5;Q687X5-2	C9JS50;Q687X5;Q687X5-2	2;2;1	2;2;1	2;2;1	0	31823000	0	Metalloreductase STEAP4	STEAP4	;;	3	2	2	2	1	2	1	1	2	1	1	2	1	5.9	5.9	5.9	38.579	339	339;459;283	1	17	0.0029091	2.3283	2.9	5.9	2.9	316760000	24480000	28965000	20175000	1	0	0	5
C9JVN9;Q9H9P8-2;Q9H9P8	C9JVN9;Q9H9P8-2;Q9H9P8	3;3;3	3;3;3	3;3;3	28878000	0	0	L-2-hydroxyglutarate dehydrogenase, mitochondrial	L2HGDH	;;	3	3	3	3	3	2	2	3	2	2	3	2	2	8.6	8.6	8.6	48.475	441	441;441;463	1	36	0	5.5747	8.6	5.2	5.2	316010000	25680000	12896000	19145000	1	0	0	8
C9JZ85;A8MV29;E7EU78;C9J1R1;Q9Y6K9;Q9Y6K9-2;F8W9A9;C9JN51;Q9Y6K9-3;C9J2V2;C9JH59	C9JZ85;A8MV29;E7EU78;C9J1R1;Q9Y6K9;Q9Y6K9-2;F8W9A9;C9JN51	5;5;5;5;5;5;4;3;2;1;1	5;5;5;5;5;5;4;3;2;1;1	5;5;5;5;5;5;4;3;2;1;1	0	61723000	81983000	NF-kappa-B essential modulator	IKBKG	;;;;;;;	11	5	5	5	2	3	4	2	3	4	2	3	4	36.3	36.3	36.3	21.653	190	190;411;412;418;419;487;368;250;320;195;205	1	50	0	8.7466	13.2	23.7	29.5	698630000	26220000	50423000	69268000	0	1	2	12
C9JZR2;O60716-5;O60716-3;O60716-2;O60716;O60716-8;O60716-7;O60716-6;O60716-4;O60716-21;O60716-19;O60716-18;O60716-17;O60716-13;O60716-11;O60716-10;O60716-9;O60716-24;O60716-23;O60716-22;O60716-20;O60716-16;O60716-15;O60716-14;O60716-12;O60716-29;O60716-27;O60716-26;O60716-25;O60716-32;O60716-31;O60716-30;O60716-28;E9PRE2;H0YC95;E9PKY0;E9PKL1	C9JZR2;O60716-5;O60716-3;O60716-2;O60716;O60716-8;O60716-7;O60716-6;O60716-4;O60716-21;O60716-19;O60716-18;O60716-17;O60716-13;O60716-11;O60716-10;O60716-9;O60716-24;O60716-23;O60716-22;O60716-20;O60716-16;O60716-15;O60716-14;O60716-12;O60716-29;O60716-27;O60716-26;O60716-25;O60716-32;O60716-31;O60716-30;O60716-28	22;22;22;22;22;21;21;21;21;20;20;20;20;20;20;20;20;19;19;19;19;19;19;19;19;14;14;14;14;13;13;13;13;6;2;2;1	22;22;22;22;22;21;21;21;21;20;20;20;20;20;20;20;20;19;19;19;19;19;19;19;19;14;14;14;14;13;13;13;13;6;2;2;1	22;22;22;22;22;21;21;21;21;20;20;20;20;20;20;20;20;19;19;19;19;19;19;19;19;14;14;14;14;13;13;13;13;6;2;2;1	616070000	635690000	620710000	Catenin delta-1	CTNND1	;;;;;;;;;;;;;;;;;;;;;;;;;;;;;;;;	37	22	22	22	18	17	15	18	17	15	18	17	15	33	33	33	104.85	938	938;933;939;962;968;912;918;941;947;832;838;861;867;879;885;908;914;811;817;840;846;858;864;887;893;610;616;639;645;589;595;618;624;261;123;126;128	1	296	0	194.51	24.4	23.5	20.6	7776100000	665170000	622030000	569640000	13	8	11	156
C9JZY6;P62256;H7C4M9;C9JZG9;P62256-2;C9J8Q9	C9JZY6;P62256;H7C4M9;C9JZG9;P62256-2	5;5;4;4;4;2	5;5;4;4;4;2	5;5;4;4;4;2	348210000	334710000	357300000	Ubiquitin-conjugating enzyme E2 H	UBE2H	;;;;	6	5	5	5	5	3	5	5	3	5	5	3	5	46.3	46.3	46.3	13.818	123	123;183;62;103;152;149	1	66	0	91.05	46.3	27.6	46.3	4215500000	373620000	220450000	445440000	2	2	3	38
D3YTI9;A2AB90;O15533-2;O15533;O15533-3;O15533-4;C9JA35	D3YTI9;A2AB90;O15533-2;O15533;O15533-3;O15533-4	8;8;8;8;8;4;3	8;8;8;8;8;4;3	8;8;8;8;8;4;3	851700000	836520000	826830000	Tapasin	TAPBP	;;;;;	7	8	8	8	7	8	8	7	8	8	7	8	8	26.8	26.8	26.8	47.551	448	448;466;412;448;504;361;192	1	146	0	47.199	24.6	26.8	26.8	10772000000	837960000	806010000	827670000	9	9	8	107
D6R938;E9PBG7;E9PF82;Q13557-8;Q13557-12;Q13557-10;Q13557;Q13557-6;Q13557-11;Q13557-9;Q13557-5;Q13557-3;Q13557-4;H0Y9J2;H0Y9C2;H7BXS4;B7Z1Z6;Q9UQM7;Q9UQM7-2;E9PBE8;E7EQE4;D6RHX9;D6RFJ0;E7ERS6;E7ETC9;B4DVQ3;H7BZC6	D6R938;E9PBG7;E9PF82;Q13557-8;Q13557-12;Q13557-10;Q13557;Q13557-6;Q13557-11;Q13557-9;Q13557-5;Q13557-3;Q13557-4	14;14;14;14;14;14;14;14;14;13;13;13;13;6;6;4;3;3;3;2;2;1;1;1;1;1;1	14;14;14;14;14;14;14;14;14;13;13;13;13;6;6;4;3;3;3;2;2;1;1;1;1;1;1	10;10;10;10;10;10;10;10;10;9;9;9;9;6;4;0;0;0;0;0;0;0;0;0;0;0;0	323060000	291030000	295560000	Calcium/calmodulin-dependent protein kinase type II subunit delta	CAMK2D	;;;;;;;;;;;;	27	14	14	10	9	11	10	9	11	10	6	7	6	34.7	34.7	25.3	56.298	498	498;512;533;478;478;492;499;513;524;489;498;510;519;182;194;362;305;478;489;168;173;24;90;112;180;180;184	1	135	0	45.584	20.3	26.9	24.7	3814700000	288830000	299820000	255710000	5	3	2	50
D6R992;Q01201;D6RIV7	D6R992;Q01201	5;5;1	5;5;1	5;5;1	42422000	46324000	54196000	Transcription factor RelB	RELB	;	3	5	5	5	3	2	4	3	2	4	3	2	4	15.6	15.6	15.6	61.776	576	576;579;58	1	41	0	23.169	10.1	6.4	12	607360000	34769000	30492000	59253000	2	1	2	18
D6R9Z7;P15954	D6R9Z7;P15954	2;2	2;2	2;2	97337000	111300000	85956000	Cytochrome c oxidase subunit 7C, mitochondrial	COX7C	;	2	2	2	2	2	1	2	2	1	2	2	1	2	32.1	32.1	32.1	6.3824	56	56;63	1	34	0	5.0723	32.1	16.1	32.1	1268100000	109170000	55507000	96023000	0	1	1	12
D6RA70;Q9H6S0;D6RF50	D6RA70;Q9H6S0	6;6;1	6;6;1	6;6;1	28209000	28892000	0	Probable ATP-dependent RNA helicase YTHDC2	YTHDC2	;	3	6	6	6	4	3	1	4	3	1	4	3	1	11.5	11.5	11.5	82.988	739	739;1430;98	1	33	0	9.3091	8.1	6	3.1	302550000	38744000	26816000	19430000	1	1	1	12
D6RB81;Q9UHK6;Q9UHK6-5;V9GZ45;V9GYP4	D6RB81;Q9UHK6;Q9UHK6-5;V9GZ45;V9GYP4	3;3;3;2;2	3;3;3;2;2	3;3;3;2;2	41496000	34568000	44956000	Alpha-methylacyl-CoA racemase	AMACR	;;;;	5	3	3	3	2	2	2	2	2	2	2	2	2	10.6	10.6	10.6	40.674	367	367;382;394;260;288	1	30	0	8.8718	6.8	6.8	6.8	399250000	45681000	30222000	45974000	1	1	0	10
D6RB92;Q5JS54-3;Q5JS54;Q5JS54-2;D6REN3;E2QRC7;H7C465	D6RB92;Q5JS54-3;Q5JS54;Q5JS54-2;D6REN3;E2QRC7;H7C465	5;5;5;5;4;4;3	5;5;5;5;4;4;3	5;5;5;5;4;4;3	64363000	78536000	0	Proteasome assembly chaperone 4	PSMG4	;;;;;;	7	5	5	5	3	3	3	3	3	3	3	3	3	75.9	75.9	75.9	11.655	108	108;104;123;162;76;82;117	1	58	0	33.92	41.7	56.5	41.7	932570000	27784000	66249000	76723000	2	1	0	30
D6RBW1;P06730;P06730-3;P06730-2;H0Y8J7;D6RHE2;H0Y8X3;A6NMX2	D6RBW1;P06730;P06730-3;P06730-2;H0Y8J7	6;6;6;6;3;1;1;1	6;6;6;6;3;1;1;1	6;6;6;6;3;1;1;1	296490000	293110000	325220000	Eukaryotic translation initiation factor 4E	EIF4E	;;;;	8	6	6	6	6	6	6	6	6	6	6	6	6	23.7	23.7	23.7	28.512	245	245;217;237;248;155;90;171;242	1	74	0	32.29	23.7	23.7	23.7	3732700000	270360000	296480000	270750000	3	2	3	37
D6RCM8;O95379-3;O95379-2;O95379;O95379-4	D6RCM8;O95379-3;O95379-2;O95379;O95379-4	3;3;3;3;3	3;3;3;3;3	3;3;3;3;3	0	82221000	97375000	Tumor necrosis factor alpha-induced protein 8	TNFAIP8	;;;;	5	3	3	3	2	3	2	2	3	2	2	3	2	15.5	15.5	15.5	23.257	200	200;188;190;198;210	1	29	0	6.4277	8.5	15.5	8.5	1029700000	102050000	79477000	81445000	0	1	1	10
D6RDH4;Q9Y3D8-2;Q9Y3D8	D6RDH4;Q9Y3D8-2;Q9Y3D8	4;4;4	4;4;4	4;4;4	78824000	94566000	0	Adenylate kinase isoenzyme 6	TAF9;AK6	;;	3	4	4	4	4	4	4	4	4	4	4	4	4	30.5	30.5	30.5	16.919	141	141;169;172	1	45	0	7.5301	30.5	30.5	30.5	1048300000	99184000	81778000	99417000	1	1	0	7
D6REA1;Q9H173;D6RIU8;D6R940;D6RG16;D6RBP7;D6RAI3	D6REA1;Q9H173	6;6;2;1;1;1;1	6;6;2;1;1;1;1	6;6;2;1;1;1;1	85573000	87812000	98379000	Nucleotide exchange factor SIL1	SIL1	;	7	6	6	6	5	5	5	5	5	5	5	5	5	19.9	19.9	19.9	52.748	468	468;461;163;94;123;123;125	1	49	0	20.774	16.9	12.4	12.4	1056500000	113590000	77286000	108780000	2	2	0	17
D6REX3;O94979-6;O94979-3;O94979-10;O94979-4;O94979-9;O94979-2;O94979;O94979-8;D6RHZ5;H7BXG7;O94979-7;O94979-5;H0YAB3;H0Y8V7;H0Y9T9;H0Y9K1;H0Y8W8;D6RE64;D6RCQ9;H0YAF5;D6RBT0;D6RHE8;H0Y9V3	D6REX3;O94979-6;O94979-3;O94979-10;O94979-4;O94979-9;O94979-2;O94979;O94979-8;D6RHZ5;H7BXG7;O94979-7;O94979-5	34;33;33;33;33;33;33;33;33;27;25;25;20;16;10;8;8;6;4;4;4;2;2;2	34;33;33;33;33;33;33;33;33;27;25;25;20;16;10;8;8;6;4;4;4;2;2;2	34;33;33;33;33;33;33;33;33;27;25;25;20;16;10;8;8;6;4;4;4;2;2;2	1554700000	1413400000	1467800000	Protein transport protein Sec31A	SEC31A	;;;;;;;;;;;;	24	34	34	34	31	26	27	31	26	27	31	26	27	35.9	35.9	35.9	136.22	1251	1251;1067;1106;1166;1181;1200;1205;1220;1233;877;969;969;509;443;285;235;237;383;164;166;181;81;92;219	1	420	0	96.617	32.9	25.5	26.1	18603000000	1666500000	1290600000	1397000000	20	16	16	206
D6RGE2;Q96CN7	D6RGE2;Q96CN7	2;2	2;2	2;2	34743000	0	0	Isochorismatase domain-containing protein 1	ISOC1	;	2	2	2	2	2	2	2	2	2	2	2	2	2	13.3	13.3	13.3	20.239	188	188;298	1	21	0	4.4214	13.3	13.3	13.3	282140000	35317000	12983000	18280000	1	1	1	7
D6RGG3;Q99715;Q99715-4;Q99715-2;H0Y5N9;H0Y4P7;H0Y991	D6RGG3;Q99715;Q99715-4	38;38;37;14;6;5;4	38;38;37;14;6;5;4	38;38;37;14;6;5;4	577660000	563630000	574210000	Collagen alpha-1(XII) chain	COL12A1	;;	7	38	38	38	31	26	24	31	26	24	31	26	24	17.2	17.2	17.2	333.2	3062	3062;3063;2987;1899;756;638;207	1	373	0	93.23	14.6	11.7	10.6	6513500000	661620000	417240000	454470000	15	8	4	127
D6RGI3;D6RER5;Q9NVA2;Q9NVA2-2;D6RDU5;H0Y961;B1AMS2;F5H1J5;Q14141-2;Q14141-4;Q14141;D6RDP1;D6R9Y6;B4E049;H0Y9G8;Q14141-3	D6RGI3;D6RER5;Q9NVA2;Q9NVA2-2;D6RDU5	16;16;16;15;13;7;7;7;7;7;7;6;6;6;3;2	16;16;16;15;13;7;7;7;7;7;7;6;6;6;3;2	13;13;13;12;10;6;5;5;5;5;5;6;6;4;3;1	521680000	548710000	559180000	Septin-11	11\Sep	;;;;	16	16	16	13	12	12	13	12	12	13	9	9	10	50.1	50.1	42.1	49.005	425	425;432;429;439;372;160;431;457;427;429;434;126;136;369;82;267	1	184	0	114.52	40.7	38.6	40.9	6945800000	477700000	682440000	531170000	10	9	11	112
D6RGY8;D6RFI3;E7EQR8;Q9GZM5;H0Y9A1	D6RGY8;D6RFI3;E7EQR8;Q9GZM5;H0Y9A1	3;3;3;3;2	3;3;3;3;2	3;3;3;3;2	59882000	60127000	53984000	Protein YIPF3;Protein YIPF3, 36 kDa form III	YIPF3	;;;;	5	3	3	3	2	3	2	2	3	2	2	3	2	39.4	39.4	39.4	12.29	109	109;262;356;350;135	1	28	0	10.979	29.4	39.4	18.3	710400000	45960000	74862000	51813000	1	0	2	13
D6RHW1;D6RIY1;D6RGK3;D6RIV9;D6RIE8;Q9HBM6;Q16594	D6RHW1;D6RIY1;D6RGK3;D6RIV9;D6RIE8;Q9HBM6;Q16594	2;2;2;2;2;2;2	2;2;2;2;2;2;2	2;2;2;2;2;2;2	0	0	17598000	Transcription initiation factor TFIID subunit 9B;Transcription initiation factor TFIID subunit 9	TAF9;TAF9B	;;;;;;	7	2	2	2	2	1	2	2	1	2	2	1	2	18.6	18.6	18.6	11.57	102	102;127;135;166;197;251;264	1	20	0.00025767	3.0517	18.6	7.8	18.6	157990000	6675900	9792700	16356000	2	1	1	15
D6RIE3;P14406;D6RGV5;H0UI06;D6R9C3;D6RA35	D6RIE3;P14406;D6RGV5;H0UI06	3;3;2;2;1;1	3;3;2;2;1;1	3;3;2;2;1;1	156500000	0	160030000	Cytochrome c oxidase subunit 7A2, mitochondrial	COX7A2	;;;	6	3	3	3	3	2	2	3	2	2	3	2	2	34.1	34.1	34.1	10.264	91	91;83;103;115;53;76	1	29	0	8.9087	34.1	25.3	23.1	1510800000	197610000	67939000	106950000	3	2	2	24
D6RIY6;Q06265;Q06265-2;D6R905;Q06265-3;Q06265-4;D6RAP4;D6RA17;H0Y9L5	D6RIY6;Q06265;Q06265-2;D6R905;Q06265-3;Q06265-4	5;5;5;3;3;3;2;2;1	5;5;5;3;3;3;2;2;1	5;5;5;3;3;3;2;2;1	109320000	112490000	131260000	Exosome complex component RRP45	EXOSC9	;;;;;	9	5	5	5	5	4	4	5	4	4	5	4	4	14.4	14.4	14.4	46.977	423	423;439;456;226;355;372;86;242;172	1	57	0	12.491	14.4	11.8	10.6	1508100000	136000000	92201000	118700000	3	2	3	30
E1P5H9;Q96BD0-3;Q96BD0-4;Q96BD0;Q96BD0-2	E1P5H9;Q96BD0-3;Q96BD0-4;Q96BD0	3;3;3;3;1	3;3;3;3;1	3;3;3;3;1	33677000	0	0	Solute carrier organic anion transporter family member 4A1	SLCO4A1	;;;	5	3	3	3	2	1	1	2	1	1	2	1	1	4.7	4.7	4.7	65.837	620	620;661;722;722;583	1	24	0.0002578	3.0569	3.1	1.3	1.6	328250000	22258000	13151000	10253000	1	0	0	7
E2QRB3;P32322-2;P32322;P32322-3;J3QR88;J3QLK9;J3QL23;J3QL32;J3QL24;J3KQ22;J3QKT4;J3KTA8;J3QKT3;J3QRZ0;J3KSA9	E2QRB3;P32322-2;P32322;P32322-3;J3QR88;J3QLK9;J3QL23;J3QL32;J3QL24;J3KQ22;J3QKT4	6;6;6;6;4;4;4;4;4;4;3;2;2;2;1	5;5;5;5;4;4;4;4;4;4;2;2;2;2;1	5;5;5;5;4;4;4;4;4;4;2;2;2;2;1	52888000	52902000	31694000	Pyrroline-5-carboxylate reductase 1, mitochondrial;Pyrroline-5-carboxylate reductase	PYCR1	;;;;;;;;;;	15	6	5	5	3	3	3	2	2	2	2	2	2	30.2	25.7	25.7	30.213	288	288;316;319;346;132;165;173;217;225;253;242;84;94;115;109	1	37	0	7.4162	16.7	14.9	14.9	666860000	51562000	37075000	38145000	1	1	1	18
E2QRF9;O75496;H7C608;C9K0U5	E2QRF9;O75496;H7C608	3;3;2;1	3;3;2;1	3;3;2;1	49582000	0	0	Geminin	GMNN	;;	4	3	3	3	2	1	1	2	1	1	2	1	1	29.6	29.6	29.6	20.539	179	179;209;102;65	1	27	0	14.272	17.3	7.3	7.3	528300000	37192000	17889000	19950000	1	0	0	16
E2QRH7;Q9NYP7;Q9NYP7-2;Q9NYP7-3	E2QRH7;Q9NYP7;Q9NYP7-2	3;3;3;1	3;3;3;1	3;3;3;1	117130000	127670000	150450000	Elongation of very long chain fatty acids protein 5	ELOVL5	;;	4	3	3	3	3	3	3	3	3	3	3	3	3	10.4	10.4	10.4	34.202	289	289;299;326;88	1	30	0	21.781	10.4	10.4	10.4	1665500000	132120000	171930000	145700000	0	0	1	8
E2QRM6;Q9H2U2;Q9H2U2-2;H0Y9D8;Q9H2U2-6;Q9H2U2-3;D6R967;D6RGV9;B4DFH3;Q9H2U2-4;D6RGI1;H0YAK2;D6RAD3	E2QRM6;Q9H2U2;Q9H2U2-2;H0Y9D8;Q9H2U2-6;Q9H2U2-3;D6R967	12;12;12;8;8;8;7;5;5;5;2;1;1	12;12;12;8;8;8;7;5;5;5;2;1;1	12;12;12;8;8;8;7;5;5;5;2;1;1	816900000	736340000	733680000	Inorganic pyrophosphatase 2, mitochondrial	PPA2	;;;;;;	13	12	12	12	10	11	11	10	11	11	10	11	11	48.7	48.7	48.7	35.731	316	316;334;349;226;232;305;191;195;202;168;88;69;113	1	193	0	41.836	39.9	43.4	44.3	9327800000	740730000	795290000	763150000	7	11	7	102
E5KLJ6;E5KLJ5;O60313;O60313-2;E5KLK1;E5KLJ9;H7C141;H7C321;C9JY58;C9JMB8	E5KLJ6;E5KLJ5;O60313;O60313-2;E5KLK1;E5KLJ9	15;15;15;15;14;14;3;2;1;1	15;15;15;15;14;14;3;2;1;1	15;15;15;15;14;14;3;2;1;1	198830000	222150000	185900000	Dynamin-like 120 kDa protein, mitochondrial;Dynamin-like 120 kDa protein, form S1	OPA1	;;;;;	10	15	15	15	13	11	9	13	11	9	13	11	9	19.1	19.1	19.1	113.49	978	978;1015;960;997;961;979;183;185;84;243	1	148	0	34.683	16.1	15	9.8	2391300000	200240000	182470000	134460000	5	4	2	54
E5RFP0;Q8WVJ2	E5RFP0;Q8WVJ2	4;4	4;4	4;4	121090000	117850000	107340000	NudC domain-containing protein 2	NUDCD2	;	2	4	4	4	3	3	3	3	3	3	3	3	3	36.4	36.4	36.4	14.745	132	132;157	1	40	0	9.5474	28.8	28.8	28.8	1217600000	105620000	101180000	92924000	2	2	3	24
E5RG17;Q6P1N9;G5EA19;U3KQS5;E5RGF2;Q6P1N9-2;H0YBX2;E5RG62;E5RK70;E5RH86	E5RG17;Q6P1N9;G5EA19;U3KQS5;E5RGF2;Q6P1N9-2;H0YBX2	5;5;4;4;4;4;3;2;2;1	5;5;4;4;4;4;3;2;2;1	5;5;4;4;4;4;3;2;2;1	57215000	61382000	75729000	Putative deoxyribonuclease TATDN1	TATDN1	;;;;;;	10	5	5	5	2	4	2	2	4	2	2	4	2	18.9	18.9	18.9	36.418	322	322;297;207;210;210;250;202;93;110;40	1	38	0	13.428	7.5	15.8	8.4	869500000	48271000	70150000	59696000	1	3	1	22
E5RGS9;Q9NRG0	E5RGS9;Q9NRG0	3;3	3;3	3;3	91846000	74679000	66620000	Chromatin accessibility complex protein 1	CHRAC1	;	2	3	3	3	3	3	3	3	3	3	3	3	3	58.9	58.9	58.9	6.2643	56	56;131	1	36	0	10.811	58.9	58.9	58.9	966490000	83434000	75854000	69044000	2	1	0	12
E5RHG8;Q15369;Q15369-2;R4GMY8	E5RHG8;Q15369;Q15369-2;R4GMY8	6;6;5;3	6;6;5;3	6;6;5;3	1264300000	1278700000	1251400000	Transcription elongation factor B polypeptide 1	TCEB1	;;;	4	6	6	6	6	6	6	6	6	6	6	6	6	82	82	82	9.9601	89	89;112;96;65	1	117	0	131.97	82	82	82	15246000000	1266900000	1264200000	1106700000	9	7	8	93
E5RHW4;O94905;E5RJ09;O94905-2;O94905-3	E5RHW4;O94905;E5RJ09	11;11;6;2;2	11;11;6;2;2	8;8;5;1;1	497820000	524030000	534150000	Erlin-2	ERLIN2	;;	5	11	11	8	10	10	9	10	10	9	7	7	6	39.3	39.3	30.2	37.725	338	338;339;197;152;206	1	133	0	75.507	36.7	34.3	31.7	5912000000	503030000	497230000	496260000	6	6	9	75
E5RIM7;O00244;E5RGN3	E5RIM7;O00244;E5RGN3	4;4;3	4;4;3	4;4;3	386650000	379530000	325220000	Copper transport protein ATOX1	ATOX1	;;	3	4	4	4	3	4	3	3	4	3	3	4	3	71.2	71.2	71.2	7.8741	73	73;68;59	1	51	0	65.317	46.6	71.2	46.6	4345800000	438020000	373120000	305090000	4	4	3	40
E5RIP4;Q15043-2;Q15043-3;Q15043;E5RFZ8;E5RGA7;E5RJ40;E5RJG5	E5RIP4;Q15043-2;Q15043-3;Q15043;E5RFZ8;E5RGA7;E5RJ40;E5RJG5	3;3;3;3;2;2;2;2	3;3;3;3;2;2;2;2	3;3;3;3;2;2;2;2	396050000	474800000	431870000	Zinc transporter ZIP14	SLC39A14	;;;;;;;	8	3	3	3	3	2	3	3	2	3	3	2	3	29	29	29	17	155	155;481;492;492;89;90;122;127	1	53	0	78.962	29	20.6	29	5101500000	509930000	202400000	525540000	3	3	3	44
E5RIW3;E5RJD8;O75347;E5RHG6;B4DT30;E5RIX8	E5RIW3;E5RJD8;O75347;E5RHG6;B4DT30	10;10;10;8;7;3	10;10;10;8;7;3	10;10;10;8;7;3	1416100000	1454000000	1484700000	Tubulin-specific chaperone A	TBCA	;;;;	6	10	10	10	9	9	9	9	9	9	9	9	9	76.2	76.2	76.2	10.08	84	84;119;108;131;129;79	1	152	0	80.583	67.9	67.9	76.2	17443000000	1458000000	1290900000	1511200000	9	8	10	105
E5RJR5;P63208;E7ERH2;F8W8N3;P63208-2;E5RGM3;E5RHM3;E5RGM4	E5RJR5;P63208;E7ERH2;F8W8N3;P63208-2	11;11;8;8;8;5;1;1	11;11;8;8;8;5;1;1	9;9;6;6;6;3;0;0	691730000	735580000	672930000	S-phase kinase-associated protein 1	SKP1	;;;;	8	11	11	9	9	9	9	9	9	9	8	8	7	77.3	77.3	49.7	18.72	163	163;163;142;158;160;102;39;41	1	141	0	81.243	60.1	51.5	63.8	9500800000	894990000	664010000	541130000	7	5	4	76
E7EM64;Q7L5N1;H7C3T0	E7EM64;Q7L5N1	12;12;3	12;12;3	12;12;3	703140000	584320000	693270000	COP9 signalosome complex subunit 6	COPS6	;	3	12	12	12	12	12	10	12	12	10	12	12	10	46.9	46.9	46.9	36.064	326	326;327;123	1	186	0	82.993	46.9	46.9	35.6	7663500000	704320000	608550000	528270000	9	7	7	91
E7EMM4;Q13510;Q13510-2;E7ERV9;Q13510-3	E7EMM4;Q13510;Q13510-2;E7ERV9;Q13510-3	5;5;5;4;3	5;5;5;4;3	5;5;5;4;3	87314000	78872000	83239000	Acid ceramidase;Acid ceramidase subunit alpha;Acid ceramidase subunit beta	ASAH1	;;;;	5	5	5	5	4	4	5	4	4	5	4	4	5	18.1	18.1	18.1	41.796	370	370;395;411;305;389	1	50	0	7.6369	14.9	14.9	18.1	1009900000	91921000	87975000	85706000	2	0	3	19
E7EMW7;O95071-2;O95071;E5RFK7	E7EMW7;O95071-2;O95071	5;5;5;1	5;5;5;1	4;4;4;1	0	0	47202000	E3 ubiquitin-protein ligase UBR5	UBR5	;;	4	5	5	4	3	2	4	3	2	4	3	2	4	2.7	2.7	2	308.57	2792	2792;2798;2799;166	1	36	0.0040563	2.1507	1.4	0.9	2	445360000	41272000	29980000	44124000	0	0	0	3
E7EN19;E7ESS2;E7ENQ1;G3XAA2;H7C360;O95819-4;O95819-2;O95819-5;G5E948;O95819;O95819-3;E7EX83;C9J840;H7C0P6;Q9UKE5-7;Q9UKE5-3;Q9UKE5-4;Q9UKE5;F5H5M9;Q9UKE5-8;Q9UKE5-5;Q9UKE5-6;Q9UKE5-2;C9J338;F5H865;H7C3Z6;E7ETN6	E7EN19;E7ESS2;E7ENQ1;G3XAA2;H7C360;O95819-4;O95819-2;O95819-5;G5E948;O95819;O95819-3;E7EX83;C9J840;H7C0P6	17;17;16;16;16;16;16;16;15;15;15;12;12;10;6;6;6;6;5;5;5;5;5;4;4;2;1	17;17;16;16;16;16;16;16;15;15;15;12;12;10;6;6;6;6;5;5;5;5;5;4;4;2;1	10;10;9;9;9;9;9;9;8;8;8;7;7;7;0;0;0;0;0;0;0;0;0;0;0;1;0	214090000	222190000	227100000	Mitogen-activated protein kinase kinase kinase kinase 4	MAP4K4	;;;;;;;;;;;;;	27	17	17	10	13	12	14	13	12	14	8	8	8	17.6	17.6	13.1	144.92	1272	1272;1279;1154;1166;1170;1165;1211;1242;1320;1239;1319;1038;1042;1056;1297;1305;1352;1360;1312;1268;1276;1323;1331;350;1338;258;102	1	158	0	33.495	14.6	14	14.1	2379500000	223360000	180780000	225720000	3	4	5	58
E7ENC1;F8WBI9;E7ETT4;E7EUY3;E7ETT1;E9PDR0;C9JQS9;E7EX59;P05166;P05166-2;C9JVY9;E9PEC3;H7C5C9	E7ENC1;F8WBI9;E7ETT4;E7EUY3;E7ETT1;E9PDR0;C9JQS9;E7EX59;P05166;P05166-2;C9JVY9;E9PEC3	3;3;3;3;3;3;3;3;3;3;2;2;1	3;3;3;3;3;3;3;3;3;3;2;2;1	3;3;3;3;3;3;3;3;3;3;2;2;1	126150000	0	0	Propionyl-CoA carboxylase beta chain, mitochondrial	PCCB	;;;;;;;;;;;	13	3	3	3	2	1	1	2	1	1	2	1	1	14.2	14.2	14.2	32.468	303	303;405;482;516;520;550;559;570;539;559;191;423;163	1	28	0	4.5658	8.9	2.3	2.3	2695700000	131340000	255880000	273220000	2	0	0	7
E7ENU4;P55265;P55265-4;P55265-5;H0YCK3;P55265-3;P55265-2	E7ENU4;P55265;P55265-4;P55265-5;H0YCK3;P55265-3;P55265-2	22;22;22;21;20;20;20	22;22;22;21;20;20;20	22;22;22;21;20;20;20	387440000	425680000	359380000	Double-stranded RNA-specific adenosine deaminase	ADAR	;;;;;;	7	22	22	22	18	18	16	18	18	16	18	18	16	21.7	21.7	21.7	140.83	1269	1269;1226;1269;931;1195;1181;1200	1	221	0	65.971	18.4	17.9	16.7	4854200000	419230000	438920000	382660000	8	12	4	96
E7EP00;G5EA31;P53992;B4DZT4	E7EP00;G5EA31;P53992	17;17;17;6	17;17;17;6	17;17;17;6	405860000	428800000	424040000	Protein transport protein Sec24C	SEC24C	;;	4	17	17	17	16	17	17	16	17	17	16	17	17	25.3	25.3	25.3	106.62	975	975;1042;1094;342	1	211	0	57.178	23.5	25.3	25.3	5309700000	468860000	422480000	440960000	6	7	9	106
E7EP42;E9PB91;B1APJ0;O14925;Q5SRD1;H0Y6X5;S4R2X5	E7EP42;E9PB91;B1APJ0;O14925;Q5SRD1;H0Y6X5;S4R2X5	2;2;2;2;2;1;1	2;2;2;2;2;1;1	2;2;2;2;2;1;1	29592000	0	0	Mitochondrial import inner membrane translocase subunit Tim23;Putative mitochondrial import inner membrane translocase subunit Tim23B	TIMM23B;TIMM23	;;;;;;	7	2	2	2	1	0	1	1	0	1	1	0	1	49.6	49.6	49.6	12.701	123	123;161;172;209;257;107;118	1	18	0	13.733	16.3	0	16.3	229010000	23593000	0	9104900	1	0	0	7
E7EPB3;P50914	E7EPB3;P50914	6;6	6;6	6;6	2176900000	2451300000	2391200000	60S ribosomal protein L14	RPL14	;	2	6	6	6	5	4	6	5	4	6	5	4	6	44.4	44.4	44.4	14.558	124	124;215	1	111	0	14.814	38.7	33.1	44.4	27983000000	2290400000	2241000000	2105500000	4	6	5	66
E7EPN9;Q9Y520-6;Q9Y520-4;Q9Y520-5;Q9Y520;Q9Y520-7;Q9Y520-3;Q9Y520-2;H7C5N8	E7EPN9;Q9Y520-6;Q9Y520-4;Q9Y520-5;Q9Y520;Q9Y520-7;Q9Y520-3;Q9Y520-2	29;29;29;29;29;29;27;26;7	29;29;29;29;29;29;27;26;7	28;28;28;28;28;28;26;26;7	566450000	554910000	632140000	Protein PRRC2C	PRRC2C	;;;;;;;	9	29	29	28	24	21	21	24	21	21	23	20	20	13.7	13.7	13.4	308.77	2819	2819;2752;2817;2849;2896;2898;2700;2653;1300	1	307	0	46.98	10.8	9	10.4	7414300000	643910000	501830000	600220000	10	11	8	120
E7EPV7;P37840-2;P37840;P37840-3;D6RA31;Q16143	E7EPV7;P37840-2;P37840;P37840-3;D6RA31	6;6;6;4;3;1	6;6;6;4;3;1	6;6;6;4;3;1	710870000	726130000	695730000	Alpha-synuclein	SNCA	;;;;	6	6	6	6	6	6	6	6	6	6	6	6	6	60	60	60	11.777	115	115;112;140;126;66;134	1	105	0	177.22	60	60	60	8305400000	803440000	673820000	639530000	7	5	5	63
E7EPW2;B4DQG6;B4DFJ5;P82663	E7EPW2;B4DQG6;B4DFJ5;P82663	3;3;3;3	3;3;3;3	3;3;3;3	67993000	56362000	0	28S ribosomal protein S25, mitochondrial	MRPS25	;;;	4	3	3	3	2	3	2	2	3	2	2	3	2	38.2	38.2	38.2	12.946	110	110;129;145;173	1	32	0	12.479	27.3	38.2	27.3	665250000	59947000	57405000	42030000	1	1	0	9
E7EQ69;Q9GZZ1;C9J5D1;Q9GZZ1-2;B0AZT5;C9JZU6;C9J5J3;F8WCK0	E7EQ69;Q9GZZ1;C9J5D1;Q9GZZ1-2;B0AZT5	12;12;10;8;6;4;4;3	12;12;10;8;6;4;4;3	12;12;10;8;6;4;4;3	205420000	189940000	239290000	N-alpha-acetyltransferase 50	NAA50	;;;;	8	12	12	12	8	7	6	8	7	6	8	7	6	64.3	64.3	64.3	19.311	168	168;169;129;81;95;57;58;48	1	100	0	39.767	50.6	41.1	38.7	2297600000	182350000	156250000	180120000	3	2	4	47
E7EQS0;P20839;P20839-3;P20839-7;P20839-5;P20839-6;C9K0R9;C9J381;P20839-2;P20839-4	E7EQS0;P20839;P20839-3;P20839-7;P20839-5;P20839-6;C9K0R9;C9J381;P20839-2;P20839-4	4;4;4;4;4;4;3;3;3;3	3;3;3;3;3;3;2;2;2;2	3;3;3;3;3;3;2;2;2;2	54658000	39405000	41382000	Inosine-5-monophosphate dehydrogenase 1;Inosine-5-monophosphate dehydrogenase	IMPDH1	;;;;;;;;;	10	4	3	3	4	4	4	3	3	3	3	3	3	10.9	9.4	9.4	57.015	530	530;514;563;566;589;599;289;513;489;509	1	28	0	13.961	10.9	10.9	10.9	544600000	71989000	49871000	50589000	3	0	1	15
E7ER89;O95340;O95340-2	E7ER89;O95340;O95340-2	7;7;7	7;7;7	7;7;7	114660000	129030000	152420000	Bifunctional 3-phosphoadenosine 5-phosphosulfate synthase 2;Sulfate adenylyltransferase;Adenylyl-sulfate kinase	PAPSS2	;;	3	7	7	7	6	7	7	6	7	7	6	7	7	15	15	15	69.997	618	618;614;619	1	110	0	17.752	12.8	15	15	1782800000	147420000	149370000	134540000	2	2	1	38
E7ERB7;B7ZLZ0;Q9P107;K7EJC2	E7ERB7;B7ZLZ0;Q9P107	5;5;5;2	5;5;5;2	5;5;5;2	40079000	31710000	0	GEM-interacting protein	GMIP	;;	4	5	5	5	3	3	0	3	3	0	3	3	0	7.1	7.1	7.1	103.7	941	941;944;970;303	1	27	0	8.3469	4.6	4.6	0	275760000	37531000	27608000	0	1	1	0	12
E7ERH3;Q68CZ2-2;Q68CZ2;Q68CZ2-4;Q68CZ2-3;C9JHU5;E9PCX8;C9JWN9;C9JTD0	E7ERH3;Q68CZ2-2;Q68CZ2;Q68CZ2-4;Q68CZ2-3;C9JHU5;E9PCX8	6;6;6;4;4;3;3;2;2	6;6;6;4;4;3;3;2;2	6;6;6;4;4;3;3;2;2	69498000	60993000	64911000	Tensin-3	TNS3	;;;;;;	9	6	6	6	4	5	3	4	5	3	4	5	3	8.5	8.5	8.5	129.07	1205	1205;1205;1445;250;391;544;1249;108;138	1	57	0	12.711	6.3	7.3	4.1	798210000	85892000	67189000	50328000	1	1	1	17
E7ERI8;E7EW49;F5H604;E3W994;J3KR49;O75122;E9PBA6;F5H3X0;H7C4X8;H7C5M8;H7C4I5;B3KR06;E7ENG2;O75122-2;C9J668;D6RBU8	E7ERI8;E7EW49;F5H604;E3W994;J3KR49;O75122;E9PBA6;F5H3X0	15;15;15;14;13;13;12;11;4;3;2;2;2;2;1;1	15;15;15;14;13;13;12;11;4;3;2;2;2;2;1;1	11;11;11;10;9;9;8;8;3;2;2;2;2;2;1;1	147480000	128220000	134460000	CLIP-associating protein 2	CLASP2	;;;;;;;	16	15	15	11	12	7	11	12	7	11	8	5	8	12.1	12.1	9.5	165.63	1513	1513;1514;1505;1273;1293;1294;995;1063;184;220;205;454;458;431;178;233	1	136	0	27.081	9.1	5.6	9.5	1717900000	171590000	90910000	134090000	5	2	7	58
E7ERK9;Q9UI10-3;Q9UI10;Q9UI10-2;H7C2L8;F8W8L6	E7ERK9;Q9UI10-3;Q9UI10;Q9UI10-2;H7C2L8	4;4;4;4;2;1	4;4;4;4;2;1	4;4;4;4;2;1	35796000	40877000	46441000	Translation initiation factor eIF-2B subunit delta	EIF2B4	;;;;	6	4	4	4	2	4	3	2	4	3	2	4	3	13.6	13.6	13.6	59.714	544	544;522;523;543;194;235	1	35	0	13.158	7.7	13.6	11.2	496280000	28993000	49185000	36583000	2	2	3	18
E7ES43;O95757;E9PDE8;D6RJ96	E7ES43;O95757;E9PDE8;D6RJ96	30;30;28;17	26;26;24;13	26;26;24;13	719840000	743730000	816540000	Heat shock 70 kDa protein 4L	HSPA4L	;;;	4	30	26	26	23	23	23	19	19	19	19	19	19	44.3	38.4	38.4	97.658	870	870;839;813;531	1	283	0	206.48	34.5	34.5	35.6	9110700000	717770000	624630000	711250000	10	10	9	145
E7ESC6;E9PEN8;Q9UIA9;E5RIW1;H0YBE1	E7ESC6;E9PEN8;Q9UIA9	19;19;19;6;4	19;19;19;6;4	18;18;18;6;4	265970000	314860000	295600000	Exportin-7	XPO7	;;	5	19	19	18	14	10	13	14	10	13	13	9	12	20.7	20.7	19.7	124.07	1088	1088;1096;1087;237;190	1	181	0	45.01	15.5	11.1	13.1	3891800000	288710000	233780000	297860000	9	4	3	82
E7ESK6;E9PBI9;P34741;E5RJB8;E5RHU3	E7ESK6;E9PBI9;P34741;E5RJB8;E5RHU3	2;2;2;1;1	2;2;2;1;1	2;2;2;1;1	34025000	38456000	34299000	Syndecan;Syndecan-2	SDC2	;;;;	5	2	2	2	2	2	2	2	2	2	2	2	2	14.5	14.5	14.5	18.388	165	165;172;201;137;145	1	18	0.00026035	3.2032	14.5	14.5	14.5	318420000	32278000	37046000	29772000	0	1	0	5
E7ESL0;J3KQY1;Q9NWU5-2;Q9NWU5-3;Q9NWU5	E7ESL0;J3KQY1;Q9NWU5-2;Q9NWU5-3;Q9NWU5	3;3;3;3;3	3;3;3;3;3	3;3;3;3;3	0	0	52299000	39S ribosomal protein L22, mitochondrial	MRPL22	;;;;	5	3	3	3	1	1	3	1	1	3	1	1	3	19.3	19.3	19.3	24.325	212	212;232;120;126;206	1	19	0	8.9164	7.5	5.7	19.3	379840000	18468000	38102000	44847000	0	1	2	15
E7ESP4;E7EMF1;E9PB77;D6RG08	E7ESP4;E7EMF1;E9PB77	26;22;15;3	1;1;1;0	1;1;1;0	173690000	201160000	175450000		ITGA2	;;	4	26	1	1	23	23	23	1	1	1	1	1	1	37.9	2.1	2.1	102.83	942	942;815;641;175	1	24	0	83.367	34.5	34	35.1	2067700000	188200000	195780000	168360000	2	2	1	20
E7EST9;B5MEG5;O94966-7;O94966-6;O94966-5;E7ESU0;O94966-4;O94966-3;O94966;O94966-2	E7EST9;B5MEG5;O94966-7;O94966-6;O94966-5;E7ESU0;O94966-4;O94966-3;O94966	6;6;6;6;6;5;5;5;5;2	6;6;6;6;6;5;5;5;5;2	6;6;6;6;6;5;5;5;5;2	27379000	0	0	Ubiquitin carboxyl-terminal hydrolase;Ubiquitin carboxyl-terminal hydrolase 19	USP19	;;;;;;;;	10	6	6	6	5	2	4	5	2	4	5	2	4	6.1	6.1	6.1	145.56	1321	1321;1358;1372;1384;1419;1089;1268;1281;1318;660	1	33	0	4.2529	4.8	1.4	4.1	220210000	37392000	9248200	17738000	2	0	1	7
E7ESZ7;O95299;Q8WXC9;C9J6X0;H7C2W5;H7C1Y7;H7C2X4;Q8N1B9	E7ESZ7;O95299;Q8WXC9;C9J6X0	5;5;5;3;2;2;2;2	5;5;5;3;2;2;2;2	5;5;5;3;2;2;2;2	42605000	0	0	NADH dehydrogenase [ubiquinone] 1 alpha subcomplex subunit 10, mitochondrial	NDUFA10	;;;	8	5	5	5	5	1	1	5	1	1	5	1	1	21	21	21	44.738	390	390;355;429;244;129;133;138;201	1	34	0	22.919	21	3.1	3.6	710410000	102520000	14486000	42570000	2	1	0	17
E7ET49;Q8NCG7-2;Q8NCG7-4;Q8NCG7;B4DVJ1;E7EVQ4	E7ET49;Q8NCG7-2;Q8NCG7-4;Q8NCG7	5;5;5;5;2;2	5;5;5;5;2;2	5;5;5;5;2;2	31216000	35456000	36033000	Sn1-specific diacylglycerol lipase beta	DAGLB	;;;	6	5	5	5	3	3	3	3	3	3	3	3	3	11.4	11.4	11.4	68.951	631	631;391;543;672;220;379	1	43	0	8.7351	6.8	6.8	5.7	467340000	61672000	43944000	33787000	2	1	2	21
E7ETB3;Q9ULA0;E7EPX3;B9ZVU2;F8WAN0;C9JBE1;E7EMB6;E5RJ35;C9JRG3;C9J1E2	E7ETB3;Q9ULA0;E7EPX3;B9ZVU2;F8WAN0;C9JBE1;E7EMB6	5;5;4;4;4;4;3;2;2;2	5;5;4;4;4;4;3;2;2;2	5;5;4;4;4;4;3;2;2;2	66141000	55092000	61926000	Aspartyl aminopeptidase	DNPEP	;;;;;;	10	5	5	5	3	3	4	3	3	4	3	3	4	12.6	12.6	12.6	54.53	493	493;475;224;270;273;331;410;89;117;137	1	49	0	9.8983	8.5	6.9	10.1	778730000	65198000	39126000	67734000	1	1	2	18
E7ETK0;P62847-2;P62847-3;P62847;P62847-4	E7ETK0;P62847-2;P62847-3;P62847;P62847-4	6;6;6;6;6	6;6;6;6;6	6;6;6;6;6	1955400000	1877100000	2176800000	40S ribosomal protein S24	RPS24	;;;;	5	6	6	6	6	5	6	6	5	6	6	5	6	41.2	41.2	41.2	15.197	131	131;130;132;133;289	1	153	0	43.261	41.2	35.9	41.2	24631000000	2154400000	1780000000	2125000000	12	10	10	138
E7ETU5;B4DN88;P29558-2;P29558;E7EPF2;C9J9B2;J3QT21;C9JIJ9;Q6XE24-3;Q6XE24-4;Q6XE24-5;Q6XE24-2;Q6XE24	E7ETU5;B4DN88;P29558-2;P29558;E7EPF2	3;3;3;3;2;1;1;1;1;1;1;1;1	3;3;3;3;2;1;1;1;1;1;1;1;1	2;2;2;2;1;1;1;1;1;1;1;1;1	93383000	95657000	107720000	RNA-binding motif, single-stranded-interacting protein 1	RBMS1	;;;;	13	3	3	2	3	3	3	3	3	3	2	2	2	10.8	10.8	8.1	40.147	370	370;419;403;406;127;264;434;436;419;420;421;433;437	1	41	0	6.6767	10.8	10.8	10.8	1253600000	99897000	102800000	102340000	2	2	1	19
E7ETY4;E9PC69;Q7KZI7-10;Q7KZI7-13;Q7KZI7-7;Q7KZI7-2;Q7KZI7-15;Q7KZI7-5;Q7KZI7-16;Q7KZI7-4;Q7KZI7-9;Q7KZI7-12;Q7KZI7-14;Q7KZI7-3;Q7KZI7-6;Q7KZI7-11;Q7KZI7-8;Q7KZI7	E7ETY4;E9PC69;Q7KZI7-10;Q7KZI7-13;Q7KZI7-7;Q7KZI7-2;Q7KZI7-15;Q7KZI7-5;Q7KZI7-16;Q7KZI7-4;Q7KZI7-9;Q7KZI7-12;Q7KZI7-14;Q7KZI7-3;Q7KZI7-6;Q7KZI7-11;Q7KZI7-8;Q7KZI7	5;5;5;5;5;5;5;5;5;5;5;5;5;5;5;5;5;5	5;5;5;5;5;5;5;5;5;5;5;5;5;5;5;5;5;5	5;5;5;5;5;5;5;5;5;5;5;5;5;5;5;5;5;5	29015000	0	0	Serine/threonine-protein kinase MARK2	MARK2	;;;;;;;;;;;;;;;;;	18	5	5	5	3	3	2	3	3	2	3	3	2	9.7	9.7	9.7	78.452	699	699;778;686;691;692;701;709;719;724;725;734;740;745;746;755;773;779;788	1	37	0	6.8757	5.3	5.3	2.9	359450000	29131000	24019000	18905000	1	0	0	5
E7ETY7;Q8TED1	E7ETY7;Q8TED1	4;4	4;4	4;4	95773000	168710000	99198000	Glutathione peroxidase;Probable glutathione peroxidase 8	GPX8	;	2	4	4	4	4	3	4	4	3	4	4	3	4	29.1	29.1	29.1	18.09	158	158;209	1	60	0	6.1534	29.1	28.5	29.1	1374300000	82414000	133390000	110500000	1	3	0	19
E7ETZ4;Q9Y6E2;B5MCH7;B5MCE7;Q75MG1;E7EMS9;E9PFD4;C9JF98;F8WDX8	E7ETZ4;Q9Y6E2;B5MCH7;B5MCE7;Q75MG1	17;17;14;11;11;7;6;6;6	16;16;13;10;11;7;6;6;6	16;16;13;10;11;7;6;6;6	869390000	822670000	955690000	Basic leucine zipper and W2 domain-containing protein 2	BZW2	;;;;	9	17	16	16	17	16	15	16	15	14	16	15	14	39.7	38	38	46.913	408	408;419;343;225;274;208;161;162;170	1	235	0	89.148	39.7	37.7	36	11283000000	996750000	821750000	908350000	8	12	9	108
E7EU23;P50395;P50395-2;Q5SX87;V9GYF8;Q5SX90;Q5SX86;Q5SX91;V9GYJ7	E7EU23;P50395;P50395-2;Q5SX87	32;32;28;16;10;10;10;10;9	32;32;28;16;10;10;10;10;9	22;22;20;9;5;5;6;5;4	6728200000	6386800000	6827500000	Rab GDP dissociation inhibitor beta	GDI2	;;;	9	32	32	22	29	28	26	29	28	26	21	21	18	79.7	79.7	56.8	51.18	449	449;445;400;263;130;148;155;203;125	1	513	0	323.31	74.8	72.6	71.3	81876000000	6779500000	7024500000	5399000000	28	21	21	311
E7EU96;P68400;Q8NEV1;P68400-2;V9GYA2;V9GY80;V9GYW6	E7EU96;P68400;Q8NEV1;P68400-2	15;15;12;10;2;2;1	15;15;12;10;2;2;1	15;15;12;10;2;2;1	521070000	502090000	486400000	Casein kinase II subunit alpha;Casein kinase II subunit alpha 3	CSNK2A1;CSNK2A3	;;;	7	15	15	15	9	11	10	9	11	10	9	11	10	53.2	53.2	53.2	45.31	385	385;391;391;255;74;79;27	1	158	0	135.21	33	34.8	34	6210600000	425240000	436610000	482280000	7	6	6	82
E7EUI7;E7EMN6;P41236;Q6NXS1	E7EUI7;E7EMN6;P41236;Q6NXS1	4;4;4;2	4;4;4;2	4;4;4;2	60105000	64442000	66706000	Protein phosphatase inhibitor 2;Protein phosphatase inhibitor 2-like protein 3	PPP1R2;PPP1R2P3	;;;	4	4	4	4	4	3	3	4	3	3	4	3	3	70	70	70	8.9811	80	80;170;205;205	1	42	0	7.886	70	58.8	58.8	853650000	86647000	53185000	59120000	2	2	2	24
E7EUM5;Q7Z3B4-3;Q7Z3B4;Q7Z3B4-2	E7EUM5;Q7Z3B4-3;Q7Z3B4;Q7Z3B4-2	8;8;8;7	8;8;8;7	8;8;8;7	67156000	77207000	70740000	Nucleoporin p54	NUP54	;;;	4	8	8	8	6	4	7	6	4	7	6	4	7	30	30	30	37.349	327	327;459;507;291	1	61	0	12.331	22.9	16.5	25.7	856010000	78746000	57410000	88994000	2	1	1	21
E7EVA0;P27816;P27816-6;P27816-2;B9ZVR1;P27816-5;E9PGM5;P27816-4;B5MEG9;H7C4C5;H0Y2V1;B4DSQ1;H7C456;P27816-7	E7EVA0;P27816;P27816-6;P27816-2;B9ZVR1;P27816-5	49;43;42;35;27;26;22;21;17;15;12;9;8;3	49;43;42;35;27;26;22;21;17;15;12;9;8;3	37;31;30;23;17;16;10;10;9;5;0;0;8;3	2508700000	2659100000	2642300000	Microtubule-associated protein;Microtubule-associated protein 4	MAP4	;;;;;	14	49	49	37	42	40	40	42	40	40	31	29	30	25.9	25.9	20.3	245.44	2297	2297;1152;1135;979;811;809;887;872;711;493;463;249;290;99	1	598	0	249.84	22.4	21.2	21.4	31132000000	2495300000	2399000000	2435600000	28	27	22	314
E7EVC7;Q676U5-3;Q676U5-2;Q676U5;Q676U5-5;C9J8C6;C9JAY7;C9J1B2;Q676U5-4	E7EVC7;Q676U5-3;Q676U5-2;Q676U5;Q676U5-5	6;6;6;6;4;1;1;1;1	6;6;6;6;4;1;1;1;1	6;6;6;6;4;1;1;1;1	39179000	0	0	Autophagy-related protein 16-1	ATG16L1	;;;;	9	6	6	6	3	1	2	3	1	2	3	1	2	18.3	18.3	18.3	70.01	624	624;470;588;607;444;55;164;187;428	1	29	0	11.098	9.6	4.2	7.4	354080000	33907000	23780000	29424000	3	0	1	10
E7EVD1;O43395;B4DSY9	E7EVD1;O43395	8;8;3	8;8;3	8;8;3	98924000	101830000	108870000	U4/U6 small nuclear ribonucleoprotein Prp3	PRPF3	;	3	8	8	8	4	6	5	4	6	5	4	6	5	18.9	18.9	18.9	72.075	634	634;683;281	1	65	0	15.072	10.9	14	9.1	1206200000	77044000	116710000	110420000	3	1	1	25
E7EVL4;Q9H490-2;Q9H490	E7EVL4;Q9H490-2;Q9H490	2;2;2	2;2;2	2;2;2	52474000	0	0	Phosphatidylinositol glycan anchor biosynthesis class U protein	PIGU	;;	3	2	2	2	2	2	1	2	2	1	2	2	1	6.4	6.4	6.4	48.22	423	423;415;435	1	25	0	10.442	6.4	6.4	2.4	434980000	67229000	27980000	15550000	3	1	0	11
E7EVQ6;Q14534;H0YBN7;E5RJH9	E7EVQ6;Q14534	7;7;2;1	7;7;2;1	7;7;2;1	159370000	163840000	168300000	Squalene monooxygenase	SQLE	;	4	7	7	7	6	5	6	6	5	6	6	5	6	22.5	22.5	22.5	53.067	479	479;574;163;184	1	68	0	27.219	20.3	17.1	19.8	1920500000	164350000	132370000	141700000	1	3	3	36
E7EVX8;Q8WWY3;Q8WWY3-2;E7ESA8;E7EU94;E7ESX0;E7EN72;Q8WWY3-3	E7EVX8;Q8WWY3;Q8WWY3-2;E7ESA8;E7EU94;E7ESX0;E7EN72	10;10;6;6;5;5;5;4	10;10;6;6;5;5;5;4	10;10;6;6;5;5;5;4	100390000	93100000	146070000	U4/U6 small nuclear ribonucleoprotein Prp31	PRPF31	;;;;;;	8	10	10	10	9	5	8	9	5	8	9	5	8	35.5	35.5	35.5	54.766	493	493;499;364;450;260;276;284;278	1	82	0	20.081	33.5	14.2	28.2	1351600000	144040000	47164000	156720000	4	1	7	39
E7EW05;Q9NVU7;Q9NVU7-2	E7EW05;Q9NVU7;Q9NVU7-2	6;6;5	6;6;5	6;6;5	106270000	113180000	87511000	Protein SDA1 homolog	SDAD1	;;	3	6	6	6	4	5	2	4	5	2	4	5	2	9.1	9.1	9.1	75.44	650	650;687;590	1	54	0	5.9794	6.2	7.8	3.8	1571500000	51705000	72804000	22863000	1	3	0	18
E7EW20;Q9UM54-5;Q9UM54-2;Q9UM54-6;Q9UM54-4;Q9UM54-1;Q9UM54	E7EW20;Q9UM54-5;Q9UM54-2;Q9UM54-6;Q9UM54-4;Q9UM54-1;Q9UM54	5;5;5;5;5;5;5	5;5;5;5;5;5;5	5;5;5;5;5;5;5	0	359980000	0	Unconventional myosin-VI	MYO6	;;;;;;	7	5	5	5	2	3	2	2	3	2	2	3	2	4.7	4.7	4.7	148.83	1286	1286;1253;1262;1285;1285;1285;1294	1	31	0	7.7861	2	2.7	2	1340400000	54255000	413080000	54580000	0	1	0	11
E7EW69;B5ME97;Q9P0V9-3;Q9P0V9;Q9P0V9-2;E7EX04;B7Z371;B7Z277;C9JEQ7;F5H1W3;F8WC85;C9JEW2;C9JNR7;F5H1F2	E7EW69;B5ME97;Q9P0V9-3;Q9P0V9;Q9P0V9-2;E7EX04;B7Z371;B7Z277	13;13;13;13;13;12;8;7;2;1;1;1;1;1	12;12;12;12;12;11;7;6;2;1;1;1;1;1	12;12;12;12;12;11;7;6;2;1;1;1;1;1	421920000	447270000	386560000	Septin-10	10\Sep	;;;;;;;	14	13	12	12	11	12	10	10	11	9	10	11	9	42.2	38	38	52.145	450	450;544;431;454;503;473;321;283;97;38;48;57;61;98	1	151	0	116	39.1	39.8	34	5003400000	484880000	417400000	369250000	6	6	8	78
E7EWK3;Q9H2U1-3;Q9H2U1;F5GZS0;Q9H2U1-2	E7EWK3;Q9H2U1-3;Q9H2U1;F5GZS0;Q9H2U1-2	9;9;9;8;8	9;9;9;8;8	8;8;8;7;7	103400000	106340000	100020000	ATP-dependent RNA helicase DHX36	DHX36	;;;;	5	9	9	8	3	5	5	3	5	5	3	5	5	17.3	17.3	16.2	91.43	797	797;979;1008;994;994	1	68	0	32.257	5.9	10.2	9.5	1144500000	41826000	99585000	89062000	1	3	1	24
E7EX17;P23588;B4DS13;F8VX11;F8VSC7;F8VP89;F8W0K0;F8VYE9;F8VRU1	E7EX17;P23588;B4DS13;F8VX11	22;22;21;11;9;9;7;6;5	22;22;21;11;9;9;7;6;5	22;22;21;11;9;9;7;6;5	1003200000	1158500000	1035300000	Eukaryotic translation initiation factor 4B	EIF4B	;;;	9	22	22	22	19	19	19	19	19	19	19	19	19	39.9	39.9	39.9	69.697	616	616;611;572;360;227;275;169;185;175	1	278	0	136.38	32	33.4	33.6	13653000000	1243100000	1056700000	1024700000	13	8	7	130
E7EX90;Q14203-3;Q14203-4;Q14203-6;Q14203;Q14203-5;Q14203-2;Q6AWB1;E7EWF7;C9JZA4;C9JTE5;C9JJN7;C9JJD0;C9JKG6;E9PCY0;C9J1B7	E7EX90;Q14203-3;Q14203-4;Q14203-6;Q14203;Q14203-5;Q14203-2;Q6AWB1	29;29;29;29;29;27;27;16;9;2;2;2;2;2;2;1	29;29;29;29;29;27;27;16;9;2;2;2;2;2;2;1	29;29;29;29;29;27;27;16;9;2;2;2;2;2;2;1	607660000	551960000	609970000	Dynactin subunit 1	DCTN1;DKFZp686E0752	;;;;;;;	16	29	29	29	20	20	22	20	20	22	20	20	22	32.2	32.2	32.2	139.09	1256	1256;1236;1253;1271;1278;1139;1144;890;191;76;76;87;121;135;186;64	1	284	0	105.33	21.6	22.5	23.2	6985100000	660570000	504810000	524170000	11	11	9	132
E7EXA6;Q8WVB6-3;Q8WVB6;Q8WVB6-2	E7EXA6;Q8WVB6-3;Q8WVB6;Q8WVB6-2	3;3;3;3	3;3;3;3	3;3;3;3	0	0	11078000	Chromosome transmission fidelity protein 18 homolog	CHTF18	;;;	4	3	3	3	2	1	1	2	1	1	2	1	1	3.1	3.1	3.1	129.4	1184	1184;557;975;1003	1	5	0.0056338	1.9858	2	0.9	0.9	25632000	9452100	5824300	10355000	2	0	0	3
E9PAU2;Q8IY67-2;Q8IY67;K7EKR9;Q8IY67-3	E9PAU2;Q8IY67-2;Q8IY67	10;10;9;3;2	10;10;9;3;2	10;10;9;3;2	141720000	140450000	157040000	Ribonucleoprotein PTB-binding 1	RAVER1	;;	5	10	10	10	7	5	6	7	5	6	7	5	6	25.3	25.3	25.3	79.578	756	756;739;606;96;75	1	93	0	47.226	18.5	11.8	14.4	1860400000	178140000	98335000	125350000	3	2	2	41
E9PAV3;F8VZJ2;H0YHX9;Q13765;E9PAV3-2;F8W1N5;F8VNW4;F8W0W4;F8VZ58;Q9BZK3	E9PAV3;F8VZJ2;H0YHX9;Q13765;E9PAV3-2;F8W1N5;F8VNW4;F8W0W4	6;5;5;5;5;4;4;4;2;1	6;5;5;5;5;4;4;4;2;1	6;5;5;5;5;4;4;4;2;1	2634500000	2838000000	2436000000	Nascent polypeptide-associated complex subunit alpha, muscle-specific form;Nascent polypeptide-associated complex subunit alpha	NACA	;;;;;;;	10	6	6	6	6	4	5	6	4	5	6	4	5	3.4	3.4	3.4	205.42	2078	2078;136;213;215;925;71;148;198;126;213	1	105	0	131.7	3.4	2.4	2.7	31939000000	2473500000	2058300000	2318600000	6	7	6	78
E9PC74;Q13144;C9JRD9	E9PC74;Q13144	8;8;1	8;8;1	8;8;1	69615000	54375000	70170000	Translation initiation factor eIF-2B subunit epsilon	EIF2B5	;	3	8	8	8	4	3	3	4	3	3	4	3	3	16	16	16	78.346	705	705;721;107	1	44	0	12.837	7.4	6.4	5.7	858300000	108950000	35052000	100220000	1	1	0	17
E9PD53;Q9NTJ3;Q9NTJ3-2;C9JR83;C9J578;C9JVD8;C9J9E4;C9JWF0;C9IYK2;C9JJ64;F8WCB7	E9PD53;Q9NTJ3;Q9NTJ3-2	34;34;31;12;5;4;4;2;2;2;1	34;34;31;12;5;4;4;2;2;2;1	34;34;31;12;5;4;4;2;2;2;1	721950000	716830000	726810000	Structural maintenance of chromosomes protein;Structural maintenance of chromosomes protein 4	SMC4	;;	11	34	34	34	25	24	20	25	24	20	25	24	20	31.3	31.3	31.3	144.45	1263	1263;1288;1230;423;139;119;157;170;173;180;50	1	315	0	172.17	22.6	21.9	17.6	8793800000	771540000	670470000	636500000	11	8	4	133
E9PDM3;P31641;C9JPV1;F8WF95;P31641-2	E9PDM3;P31641;C9JPV1;F8WF95;P31641-2	2;2;1;1;1	2;2;1;1;1	2;2;1;1;1	50767000	60117000	48902000	Sodium- and chloride-dependent taurine transporter;Transporter	SLC6A6	;;;;	5	2	2	2	2	2	2	2	2	2	2	2	2	7.2	7.2	7.2	40.516	359	359;620;109;112;200	1	23	0	9.2191	7.2	7.2	7.2	578820000	48996000	63084000	43255000	1	1	1	11
E9PDN5;P11532-3;P11532-2;P11532-4;P11532;E7EQS5;F8VX32;E7ESB2;H0Y304;P11532-8;P11532-7;P11532-5;P11532-6;F5GZY3;E7EQR9;P11532-10;P11532-9;H0Y3E8	E9PDN5;P11532-3;P11532-2;P11532-4;P11532;E7EQS5;F8VX32;E7ESB2;H0Y304;P11532-8;P11532-7;P11532-5;P11532-6;F5GZY3;E7EQR9;P11532-10;P11532-9	5;5;5;5;5;4;4;4;4;4;4;4;4;3;3;3;3;2	5;5;5;5;5;4;4;4;4;4;4;4;4;3;3;3;3;2	5;5;5;5;5;4;4;4;4;4;4;4;4;3;3;3;3;2	89354000	67549000	62345000	Dystrophin	DMD	;;;;;;;;;;;;;;;;	18	5	5	5	5	3	3	5	3	3	5	3	3	1.6	1.6	1.6	426.02	3681	3681;2341;2344;3677;3685;1225;1230;1243;1386;604;617;622;635;1115;1133;507;525;238	1	47	0	12.017	1.6	1.1	1.1	927430000	84702000	36559000	23629000	4	2	3	27
E9PE17;I3L0E3;Q9Y2R5	E9PE17;I3L0E3;Q9Y2R5	2;2;2	2;2;2	2;2;2	32469000	29745000	0	28S ribosomal protein S17, mitochondrial	MRPS17;hCG_1984214	;;	3	2	2	2	2	2	1	2	2	1	2	2	1	22.5	22.5	22.5	14.374	129	129;225;130	1	17	0	6.3481	22.5	22.5	7	359460000	34588000	27395000	25741000	1	1	1	13
E9PEM5;F5H1X8;P50851-2;P50851;H0YAC6;Q5T321;F5GXV7;Q8NFP9;H0Y9N9	E9PEM5;F5H1X8;P50851-2;P50851	20;20;20;19;8;2;2;2;1	20;20;20;19;8;2;2;2;1	20;20;20;19;8;2;2;2;1	192440000	125390000	145480000	Lipopolysaccharide-responsive and beige-like anchor protein	LRBA	;;;	9	20	20	20	12	13	10	12	13	10	12	13	10	9.4	9.4	9.4	286.97	2575	2575;2852;2851;2863;1505;2943;2946;2946;134	1	144	0	25.868	5.7	5.9	4.8	1932200000	154980000	165740000	149750000	6	0	2	34
E9PEP6;O14786;Q5JWQ4;E7EX60;Q5T7F0;Q5JWQ6;O14786-3;O14786-2;Q5JWQ2	E9PEP6;O14786;Q5JWQ4;E7EX60;Q5T7F0;Q5JWQ6;O14786-3;O14786-2	4;4;3;3;3;3;3;3;1	4;4;3;3;3;3;3;3;1	4;4;3;3;3;3;3;3;1	0	34964000	0	Neuropilin-1	NRP1	;;;;;;;	9	4	4	4	3	3	3	3	3	3	3	3	3	6.1	6.1	6.1	101.3	906	906;923;597;641;704;735;609;644;105	1	32	0	8.2315	4.2	4.9	4.9	439020000	38457000	37161000	45022000	0	1	0	5
E9PER6;C9JWR9;Q6A1A2;O15530-5;O15530-2;O15530-3;O15530;H3BQ10;O15530-4	E9PER6;C9JWR9;Q6A1A2;O15530-5;O15530-2;O15530-3;O15530;H3BQ10;O15530-4	2;2;2;2;2;2;2;1;1	2;2;2;2;2;2;2;1;1	2;2;2;2;2;2;2;1;1	0	0	12698000	Putative 3-phosphoinositide-dependent protein kinase 2;3-phosphoinositide-dependent protein kinase 1	PDPK1;PDPK2P	;;;;;;;;	9	2	2	2	0	0	1	0	0	1	0	0	1	5.7	5.7	5.7	60.328	529	529;532;396;454;506;530;556;149;429	1	5	0.0029147	2.349	0	0	3	53873000	0	0	11870000	0	0	1	4
E9PES6;E7ES08;E7EQU1;O15347	E9PES6;E7ES08;E7EQU1;O15347	5;5;5;5	5;5;5;5	5;5;5;5	149170000	152730000	160730000	High mobility group protein B3	HMGB3	;;;	4	5	5	5	4	4	4	4	4	4	4	4	4	26.8	26.8	26.8	17.522	153	153;188;193;200	1	49	0	8.3469	26.1	26.1	26.1	2073600000	161600000	140680000	139060000	2	1	2	20
E9PF18;Q16836;Q16836-3;Q16836-2	E9PF18;Q16836;Q16836-3;Q16836-2	12;12;12;12	12;12;12;12	12;12;12;12	969760000	943180000	838280000	Hydroxyacyl-coenzyme A dehydrogenase, mitochondrial	HADH	;;;	4	12	12	12	10	8	9	10	8	9	10	8	9	50.3	50.3	50.3	35.236	318	318;314;331;390	1	137	0	87.444	38.1	33	35.8	10663000000	1026700000	828440000	881530000	9	4	7	76
E9PF19;Q9Y4P3;C9JVF0;F8WCR3;F8WDI9	E9PF19;Q9Y4P3;C9JVF0	12;12;6;2;2	12;12;6;2;2	12;12;6;2;2	223140000	173220000	223150000	Transducin beta-like protein 2	TBL2	;;	5	12	12	12	10	9	8	10	9	8	10	9	8	38	38	38	45.935	411	411;447;270;107;176	1	109	0	66.103	29.2	30.4	24.6	2528800000	257530000	132640000	230800000	4	4	5	58
E9PFK9;E7ERJ8;Q9UJ41-2;Q9UJ41-4;Q9UJ41-3;Q9UJ41	E9PFK9;E7ERJ8;Q9UJ41-2;Q9UJ41-4;Q9UJ41-3;Q9UJ41	4;4;4;4;4;4	4;4;4;4;4;4	4;4;4;4;4;4	0	0	30894000	Rab5 GDP/GTP exchange factor	RABGEF1	;;;;;	6	4	4	4	2	1	2	2	1	2	2	1	2	10.9	10.9	10.9	58.394	504	504;531;491;505;531;708	1	23	0	6.0627	3.8	2	6	307730000	30489000	14807000	22997000	0	0	2	10
E9PFQ4;Q86SQ0-2;Q86SQ0-3;Q86SQ0;G5E9V3;E9PGF6;E9PDY7	E9PFQ4;Q86SQ0-2;Q86SQ0-3;Q86SQ0;G5E9V3;E9PGF6	4;4;4;4;2;2;1	4;4;4;4;2;2;1	4;4;4;4;2;2;1	0	67217000	39635000	Pleckstrin homology-like domain family B member 2	PHLDB2	;;;;;	7	4	4	4	1	2	2	1	2	2	1	2	2	5.4	5.4	5.4	125.47	1115	1115;1210;1237;1253;581;744;519	1	32	0	7.3495	1	3.3	3.3	421000000	19136000	41745000	22266000	1	1	2	10
E9PFR3;Q14738-3;Q14738-2;Q14738;H0Y8C4;H7C5Q9;H0YJ35;Q15173-2;Q15173	E9PFR3;Q14738-3;Q14738-2;Q14738;H0Y8C4	11;11;11;11;9;4;1;1;1	11;11;11;11;9;4;1;1;1	6;6;6;6;5;2;0;0;0	198370000	207500000	205970000	Serine/threonine-protein phosphatase 2A 56 kDa regulatory subunit delta isoform	PPP2R5D	;;;;	9	11	11	6	8	7	7	8	7	7	5	5	5	25.9	25.9	13.8	69.116	594	594;496;570;602;504;154;71;494;497	1	116	0	27.286	18	16	13.6	2508100000	157590000	161280000	196920000	6	4	2	49
E9PFW3;Q96CW1-2;Q96CW1;C9JJ47;C9JTK4;C9JGT8;C9JJD3;C9JPV8;H7C4C3	E9PFW3;Q96CW1-2;Q96CW1;C9JJ47	20;20;20;12;9;9;8;8;3	20;20;20;12;9;9;8;8;3	20;20;20;12;9;9;8;8;3	954050000	999640000	1059600000	AP-2 complex subunit mu	AP2M1	;;;	9	20	20	20	18	16	17	18	16	17	18	16	17	50	50	50	52.303	460	460;433;435;252;160;195;113;136;122	1	286	0	139.95	46.1	40.9	44.3	12216000000	1039900000	871460000	978020000	9	13	12	144
E9PG35;E9PHF7;Q96RQ3;F5GYT8;G5E9X5	E9PG35;E9PHF7;Q96RQ3;F5GYT8;G5E9X5	5;5;5;4;3	5;5;5;4;3	5;5;5;4;3	46046000	42825000	55989000	Methylcrotonoyl-CoA carboxylase subunit alpha, mitochondrial	MCCC1	;;;;	5	5	5	5	5	3	2	5	3	2	5	3	2	13.2	13.2	13.2	66.467	598	598;616;725;426;434	1	38	0	9.4439	13.2	8.9	4.8	622640000	59953000	42107000	44454000	1	1	1	11
E9PG39;E9PC15;Q53H12	E9PG39;E9PC15;Q53H12	4;4;4	4;4;4	4;4;4	92688000	80486000	98392000	Acylglycerol kinase, mitochondrial	AGK	;;	3	4	4	4	3	3	4	3	3	4	3	3	4	23.8	23.8	23.8	26.925	244	244;394;422	1	51	0	35.826	20.5	20.5	23.8	1153900000	107520000	75815000	98699000	2	1	1	18
E9PG40;P05067-7;P05067-11;P05067-8;P05067-9;P05067;H7C104;H7C0V9;E9PEV0;P05067-10;P05067-3;P05067-4;P05067-5;P05067-6;H7C2L2	E9PG40;P05067-7;P05067-11;P05067-8;P05067-9;P05067;H7C104;H7C0V9;E9PEV0;P05067-10;P05067-3;P05067-4;P05067-5;P05067-6	5;5;5;5;5;5;4;4;4;4;4;4;4;4;1	5;5;5;5;5;5;4;4;4;4;4;4;4;4;1	5;5;5;5;5;5;4;4;4;4;4;4;4;4;1	63749000	79390000	54542000	Amyloid beta A4 protein;N-APP;Soluble APP-alpha;Soluble APP-beta;C99;Beta-amyloid protein 42;Beta-amyloid protein 40;C83;P3(42);P3(40);C80;Gamma-secretase C-terminal fragment 59;Gamma-secretase C-terminal fragment 57;Gamma-secretase C-terminal fragment 50;C31	APP	;;;;;;;;;;;;;	15	5	5	5	5	3	4	5	3	4	5	3	4	8	8	8	80.832	714	714;733;746;751;752;770;280;485;660;639;677;695;696;714;181	1	53	0	7.3811	8	3.8	5.6	730340000	69620000	61320000	71830000	3	1	2	16
E9PGC0;P20936-2;B4DTL2;P20936;Q68CU6	E9PGC0;P20936-2;B4DTL2;P20936	4;4;4;4;1	4;4;4;4;1	4;4;4;4;1	21702000	0	0	Ras GTPase-activating protein 1	RASA1	;;;	5	4	4	4	3	2	2	3	2	2	3	2	2	5.3	5.3	5.3	101.79	881	881;870;880;1047;539	1	28	0	4.8972	3.9	2.3	2.3	183580000	22167000	14355000	4623100	2	0	1	9
E9PGT3;Q15418-3;E9PRI4;Q15418;Q15418-2;B7Z3B5;F2Z2J1;Q15349;Q15349-3;Q15349-2;E9PMM7;Q5SVM7;Q5SVM6;E9PAN7	E9PGT3;Q15418-3;E9PRI4;Q15418;Q15418-2	14;14;14;14;14;4;4;4;4;4;3;3;3;2	10;10;10;10;10;1;1;1;1;1;1;2;3;1	10;10;10;10;10;1;1;1;1;1;1;2;3;1	147500000	123710000	128880000	Ribosomal protein S6 kinase;Ribosomal protein S6 kinase alpha-1	RPS6KA1	;;;;	14	14	10	10	10	9	10	7	6	7	7	6	7	24.9	18.9	18.9	81.471	724	724;643;719;735;744;644;758;733;741;758;112;115;166;204	1	99	0	21.786	17	15.1	17.5	1692700000	164450000	150640000	103050000	2	2	3	37
E9PGT6;Q99627-2;Q99627;H7C3S9;B8ZZP3	E9PGT6;Q99627-2;Q99627;H7C3S9;B8ZZP3	5;5;5;4;4	5;5;5;4;4	5;5;5;4;4	216730000	229100000	281480000	COP9 signalosome complex subunit 8	COPS8	;;;;	5	5	5	5	4	5	4	4	5	4	4	5	4	42.2	42.2	42.2	19.344	173	173;160;209;83;206	1	60	0	80.939	36.4	42.2	34.7	2805200000	219840000	230830000	223880000	2	2	3	34
E9PH64;E7EWZ0;E9PF49;Q9Y6M9	E9PH64;E7EWZ0;E9PF49;Q9Y6M9	3;3;3;3	3;3;3;3	3;3;3;3	44789000	59746000	54561000	NADH dehydrogenase [ubiquinone] 1 beta subcomplex subunit 9	NDUFB9	;;;	4	3	3	3	2	2	2	2	2	2	2	2	2	19	19	19	20.383	168	168;178;221;179	1	29	0	5.2292	13.7	13.7	13.7	626720000	40454000	53436000	51194000	0	1	1	13
E9PHA2;Q15003;C9J470;Q15003-2;C9JZP1;H7C415	E9PHA2;Q15003;C9J470;Q15003-2	16;16;14;12;6;2	16;16;14;12;6;2	16;16;14;12;6;2	191490000	183310000	183560000	Condensin complex subunit 2	NCAPH	;;;	6	16	16	16	9	11	10	9	11	10	9	11	10	30.3	30.3	30.3	81.572	730	730;741;607;605;216;182	1	122	0	26.419	17.3	20.7	18.6	2293900000	217400000	188050000	169680000	3	4	4	47
E9PHH9;Q9BUI4	E9PHH9;Q9BUI4	1;1	1;1	1;1	29736000	0	0	DNA-directed RNA polymerase III subunit RPC3	POLR3C	;	2	1	1	1	1	1	1	1	1	1	1	1	1	4.1	4.1	4.1	46.189	411	411;534	1	25	0	13.245	4.1	4.1	4.1	260680000	30505000	29448000	0	2	2	2	23
E9PI68;Q15005;E9PL01;E9PRB9;H0YE04	E9PI68;Q15005;E9PL01;E9PRB9	10;10;9;5;3	10;10;9;5;3	10;10;9;5;3	949030000	989890000	1020900000	Signal peptidase complex subunit 2	SPCS2	;;;	5	10	10	10	8	10	9	8	10	9	8	10	9	43.6	43.6	43.6	28.503	257	257;226;157;87;166	1	163	0	151.27	36.2	43.6	39.3	11757000000	927010000	1027800000	780340000	8	6	8	101
E9PIB2;G3V1A6;P57764	E9PIB2;G3V1A6;P57764	1;1;1	1;1;1	1;1;1	0	0	7821600	Gasdermin-D	GSDMD	;;	3	1	1	1	0	0	1	0	0	1	0	0	1	4.7	4.7	4.7	30.824	277	277;532;484	1	4	0.0058575	1.9731	0	0	4.7	22578000	0	0	7311500	0	0	0	3
E9PIE3;Q969G5	E9PIE3;Q969G5	6;6	6;6	6;6	137200000	134360000	145720000	Protein kinase C delta-binding protein	PRKCDBP	;	2	6	6	6	4	5	6	4	5	6	4	5	6	21.5	21.5	21.5	31.088	293	293;261	1	77	0	31.726	15	18.1	21.5	1826400000	130220000	136720000	124530000	3	4	3	35
E9PJ55;Q9NUJ3;R4GNF5;E9PP52;E9PMB0;E7EN41	E9PJ55;Q9NUJ3	3;3;1;1;1;1	3;3;1;1;1;1	3;3;1;1;1;1	0	26621000	24895000	T-complex protein 11-like protein 1	TCP11L1	;	6	3	3	3	2	2	2	2	2	2	2	2	2	6.6	6.6	6.6	67.238	595	595;509;106;144;154;374	1	28	0	12.224	4.5	3.7	4.9	274110000	20866000	21371000	22149000	0	1	1	17
E9PJ81;Q04323;Q04323-2;E9PRQ7;E9PS08	E9PJ81;Q04323;Q04323-2;E9PRQ7	9;9;9;8;1	9;9;9;8;1	9;9;9;8;1	599420000	633900000	562820000	UBX domain-containing protein 1	UBXN1	;;;	5	9	9	9	8	8	8	8	8	8	8	8	8	40	40	40	32.611	290	290;297;312;293;100	1	122	0	316.62	37.2	34.5	34.5	7527300000	703360000	582640000	511670000	5	6	3	60
E9PJF0;E9PQW4;P27361-3;P27361;P27361-2;E9PBK7;B3KR49;H0YDH9;H0YEX6;E9PRH7;K7ELV1;K7EN18	E9PJF0;E9PQW4;P27361-3;P27361;P27361-2;E9PBK7;B3KR49	8;8;8;8;7;5;4;2;1;1;1;1	4;4;4;4;3;2;1;0;1;1;0;0	4;4;4;4;3;2;1;0;1;1;0;0	63887000	81837000	71654000	Mitogen-activated protein kinase;Mitogen-activated protein kinase 3	MAPK3	;;;;;;	12	8	4	4	6	8	8	2	4	4	2	4	4	34.5	19.9	19.9	35.737	316	316;339;357;379;335;311;265;87;121;136;233;281	1	49	0	17.534	24.4	34.5	34.5	958940000	48698000	75733000	115140000	0	1	2	14
E9PJK1;E9PRJ8;H0YDL9;H0YDJ9;E9PIF1;A6NMH8;P60033;E9PM31;H0YEE2	E9PJK1;E9PRJ8;H0YDL9;H0YDJ9;E9PIF1;A6NMH8;P60033;E9PM31;H0YEE2	2;2;2;2;2;2;2;1;1	2;2;2;2;2;2;2;1;1	2;2;2;2;2;2;2;1;1	112090000	128350000	0	Tetraspanin;CD81 antigen	CD81	;;;;;;;;	9	2	2	2	2	2	1	2	2	1	2	2	1	26.1	26.1	26.1	17.963	165	165;209;221;225;242;274;236;92;148	1	33	0	104.03	26.1	26.1	13.9	1285500000	134460000	116140000	68116000	1	2	0	18
E9PK54	E9PK54	14	1	1	170990000	205470000	164460000		HSPA8		1	14	1	1	14	14	13	1	1	1	1	1	1	82	6.6	6.6	19.955	183	183	1	24	0.0042715	2.0935	82	82	80.9	1975400000	179470000	229720000	151830000	0	1	1	9
E9PK67;E9PNI7;Q53GL7;E9PPE7;F8W8G7;E9PJI2;E9PPV8;E9PM86;E9PSE7;E9PIA6;E9PIK9	E9PK67;E9PNI7;Q53GL7;E9PPE7	12;12;12;8;3;2;2;1;1;1;1	12;12;12;8;3;2;2;1;1;1;1	12;12;12;8;3;2;2;1;1;1;1	154590000	171750000	132360000	Poly [ADP-ribose] polymerase 10	PARP10	;;;	11	12	12	12	7	10	6	7	10	6	7	10	6	19.1	19.1	19.1	109.1	1016	1016;1037;1025;764;339;172;178;128;135;144;146	1	115	0	27.045	10.2	16.5	9.9	1926800000	141290000	186700000	97914000	2	3	2	32
E9PK91;Q9NYF8-3;Q9NYF8-2;Q9NYF8;E9PK09;E9PQN2;E9PKI6;Q9NYF8-4;E9PJA7;H0YF00;H0YF63;B0AZU3;H0YF14	E9PK91;Q9NYF8-3;Q9NYF8-2;Q9NYF8;E9PK09;E9PQN2;E9PKI6;Q9NYF8-4	13;13;13;13;12;12;12;8;6;2;1;1;1	13;13;13;13;12;12;12;8;6;2;1;1;1	13;13;13;13;12;12;12;8;6;2;1;1;1	375470000	359430000	413220000	Bcl-2-associated transcription factor 1	BCLAF1	;;;;;;;	13	13	13	13	9	9	10	9	9	10	9	9	10	17.7	17.7	17.7	100.4	871	871;869;918;920;725;750;752;747;467;118;126;138;187	1	149	0	23.339	12.3	13.2	13.8	4817900000	418750000	351700000	372410000	7	7	7	77
E9PK95;P28702;P28702-3	E9PK95;P28702;P28702-3	5;5;5	5;5;5	1;1;1	49669000	47302000	46727000	Retinoic acid receptor RXR-beta	RXRB	;;	3	5	5	1	4	5	2	4	5	2	1	1	0	18.2	18.2	4.9	38.516	347	347;533;537	1	41	0	9.2815	14.1	18.2	6.6	509370000	46582000	59468000	38438000	1	2	1	10
E9PKG1;H7C2I1;Q99873-3;Q99873-2;Q99873-4;Q99873;E9PIX6;E9PQ98;H0YDE4;E9PNR9;E9PMW9;E9PI83;Q9NR22-2;Q9NR22;E9PMZ2	E9PKG1;H7C2I1;Q99873-3;Q99873-2;Q99873-4;Q99873;E9PIX6;E9PQ98;H0YDE4;E9PNR9	20;20;20;20;20;20;14;13;11;10;5;5;3;3;2	20;20;20;20;20;20;14;13;11;10;5;5;3;3;2	20;20;20;20;20;20;14;13;11;10;5;5;3;3;2	1401100000	1159400000	1505500000	Protein arginine N-methyltransferase 1	PRMT1	;;;;;;;;;	15	20	20	20	15	18	20	15	18	20	15	18	20	68	68	68	37.709	325	325;371;343;347;353;361;209;205;238;160;110;113;385;394;63	1	314	0	97.697	56	63.1	68	16341000000	1339400000	1155500000	1494300000	19	17	18	220
E9PKH6;E9PPW7;O00217;E9PN51;F8W9K7;H0YDT4	E9PKH6;E9PPW7;O00217;E9PN51;F8W9K7	5;5;5;4;4;1	5;5;5;4;4;1	5;5;5;4;4;1	48126000	60192000	49097000	NADH dehydrogenase [ubiquinone] iron-sulfur protein 8, mitochondrial	NDUFS8	;;;;	6	5	5	5	3	4	4	3	4	4	3	4	4	41.3	41.3	41.3	15.892	138	138;184;210;110;124;93	1	39	0	13.213	25.4	33.3	33.3	658450000	48811000	70004000	53353000	2	2	1	20
E9PKP7;P17480-2;P17480;E9PMM2;H0YDH7	E9PKP7;P17480-2;P17480;E9PMM2	6;6;6;3;1	6;6;6;3;1	6;6;6;3;1	103330000	120040000	113610000	Nucleolar transcription factor 1	UBTF	;;;	5	6	6	6	6	5	6	6	5	6	6	5	6	8.6	8.6	8.6	87.435	745	745;727;764;149;36	1	67	0	14.176	8.6	6.8	8.6	1300300000	121430000	121540000	124190000	2	1	2	21
E9PKS9;E9PQE8;E9PN70;B4DME1;Q9Y296;G3V1A0;G5EA23;J3KP27	E9PKS9;E9PQE8;E9PN70;B4DME1;Q9Y296	3;3;3;3;3;1;1;1	3;3;3;3;3;1;1;1	3;3;3;3;3;1;1;1	33560000	0	31668000	Trafficking protein particle complex subunit 4	TRAPPC4	;;;;	8	3	3	3	2	1	2	2	1	2	2	1	2	28.6	28.6	28.6	14.15	126	126;176;257;165;219;117;126;181	1	29	0.00025927	3.145	17.5	8.7	17.5	369650000	42491000	5150200	38510000	0	0	0	4
E9PL10;Q96K17;Q96K17-2	E9PL10;Q96K17;Q96K17-2	6;6;4	6;6;4	6;6;4	358710000	243810000	286250000	Transcription factor BTF3;Transcription factor BTF3 homolog 4	BTF3L4	;;	3	6	6	6	5	5	6	5	5	6	5	5	6	37.9	37.9	37.9	15.779	145	145;158;100	1	81	0	41.646	37.9	37.9	37.9	3599800000	351770000	215600000	274800000	3	2	2	28
E9PLK3;P55786;B7Z463;E5RJ24;E7EWZ2;I3L083;A6NEC2;F5GZY4;H0YAQ6;H0YDG0;E9PP11;A6NEC2-2;E9PJ74;H0YCQ5;E9PJY4;E9PPD4;E9PRQ5;A6NEC2-3;E9PJF9;E9PPZ2;E9PI82	E9PLK3;P55786;B7Z463	45;45;41;15;15;15;15;12;11;8;8;8;5;4;4;4;4;3;2;2;1	45;45;41;15;15;15;15;12;11;8;8;8;5;4;4;4;4;3;2;2;1	45;45;41;15;15;15;15;12;11;8;8;8;5;4;4;4;4;3;2;2;1	3426600000	3389200000	3406300000	Puromycin-sensitive aminopeptidase	NPEPPS	;;	21	45	45	45	36	38	38	36	38	38	36	38	38	62.4	62.4	62.4	102.99	915	915;919;839;471;477;478;478;324;431;169;201;263;158;65;141;163;172;163;134;178;127	1	642	0	323.31	48.2	50.3	50.5	41151000000	3420700000	3118500000	3293300000	36	24	28	363
E9PM04;Q9BTE7;H0YCN4;H0Y9C5;E9PLH8;E9PM78;H0YD80;E9PLS2;E9PQV9;H0Y907;B4DH26;Q92564-2;Q92564;Q92564-3	E9PM04;Q9BTE7;H0YCN4	5;5;3;1;1;1;1;1;1;1;1;1;1;1	5;5;3;1;1;1;1;1;1;1;1;1;1;1	5;5;3;1;1;1;1;1;1;1;1;1;1;1	276350000	0	269390000	DCN1-like protein;DCN1-like protein 5	DCUN1D5	;;	14	5	5	5	4	2	4	4	2	4	4	2	4	34.2	34.2	34.2	17.855	152	152;237;195;21;30;67;68;71;84;116;232;257;292;336	1	42	0	9.3844	27	10.5	24.3	2131700000	394770000	27213000	70492000	2	0	1	17
E9PM46;Q96K76-2;Q96K76;Q96K76-3	E9PM46;Q96K76-2;Q96K76	20;19;19;1	20;19;19;1	20;19;19;1	243740000	242800000	295350000	Ubiquitin carboxyl-terminal hydrolase 47	USP47	;;	4	20	20	20	12	12	9	12	12	9	12	12	9	19.3	19.3	19.3	154.7	1355	1355;1287;1375;157	1	155	0	45.386	11	12.3	8.2	3026200000	297260000	267120000	291680000	7	3	2	49
E9PM92;O00193;E9PRZ9;E3W975;E9PQA1	E9PM92;O00193;E9PRZ9;E3W975	4;4;3;3;1	4;4;3;3;1	4;4;3;3;1	193710000	243510000	269880000	Small acidic protein	C11orf58;SMAP	;;;	5	4	4	4	4	4	3	4	4	3	4	4	3	30.1	30.1	30.1	17.506	156	156;183;90;139;86	1	73	0	12.819	30.1	30.1	15.4	3666600000	348810000	305970000	265700000	4	4	2	41
E9PMI6;J3KN38;P54105	E9PMI6;J3KN38;P54105	2;2;2	2;2;2	2;2;2	31314000	31687000	32960000	Methylosome subunit pICln	CLNS1A	;;	3	2	2	2	2	1	2	2	1	2	2	1	2	29.9	29.9	29.9	18.259	167	167;203;237	1	21	0	8.6562	29.9	11.4	29.9	321850000	27615000	26760000	49385000	1	1	1	7
E9PMM3;Q9Y5Y5;Q9Y5Y5-2;E9PMS3;E9PQW0;E9PLS4;E9PP98	E9PMM3;Q9Y5Y5;Q9Y5Y5-2;E9PMS3;E9PQW0;E9PLS4;E9PP98	2;2;2;1;1;1;1	2;2;2;1;1;1;1	2;2;2;1;1;1;1	37516000	0	33402000	Peroxisomal membrane protein PEX16	PEX16	;;;;;;	7	2	2	2	2	1	2	2	1	2	2	1	2	13.1	13.1	13.1	21.165	183	183;336;346;52;60;160;241	1	25	0.00025694	2.9914	13.1	6	13.1	352390000	50393000	0	37257000	0	1	3	10
E9PMQ6;Q00613-2;Q00613;E9PI02	E9PMQ6;Q00613-2;Q00613;E9PI02	2;2;2;1	2;2;2;1	2;2;2;1	41669000	0	39203000	Heat shock factor protein 1	HSF1	;;;	4	2	2	2	2	1	2	2	1	2	2	1	2	6.5	6.5	6.5	46.536	430	430;489;529;138	1	19	0	4.0819	6.5	2.8	6.5	273720000	41961000	10906000	34455000	1	0	1	8
E9PMR4;P48509;E9PRJ3	E9PMR4;P48509;E9PRJ3	4;4;3	4;4;3	4;4;3	389990000	484590000	430440000	Tetraspanin;CD151 antigen	CD151	;;	3	4	4	4	3	3	3	3	3	3	3	3	3	13.9	13.9	13.9	28.067	251	251;253;178	1	42	0	7.6754	10	10	10	5354400000	373130000	428960000	385080000	0	2	1	15
E9PMS6;Q8WWI1-3;F8WD26;J3KP06;Q8WWI1-4;Q8WWI1-2;Q8WWI1;E9PMT2;E9PLH4;E9PMP7;H0Y424;E9PLU6;E9PK58;E9PJ10;H0YDQ3;H0YDG6;H0YE95	E9PMS6;Q8WWI1-3;F8WD26;J3KP06;Q8WWI1-4;Q8WWI1-2;Q8WWI1;E9PMT2;E9PLH4;E9PMP7;H0Y424	15;15;14;14;14;14;14;13;13;10;8;2;2;2;2;2;1	15;15;14;14;14;14;14;13;13;10;8;2;2;2;2;2;1	15;15;14;14;14;14;14;13;13;10;8;2;2;2;2;2;1	193790000	285290000	262660000	LIM domain only protein 7	LMO7	;;;;;;;;;;	17	15	15	15	11	11	12	11	11	12	11	11	12	14	14	14	145.42	1275	1275;1349;1614;1670;1614;1670;1683;1398;1385;1045;1055;121;165;191;292;305;179	1	125	0	23.601	10.1	10.4	11.1	2625500000	233030000	262400000	353680000	3	7	4	52
E9PN41;A8MVV6;J3KQ42;O14817;E9PSH3;E9PPX8;J3KNL1	E9PN41;A8MVV6;J3KQ42;O14817;E9PSH3;E9PPX8	3;3;3;3;2;2;1	3;3;3;3;2;2;1	3;3;3;3;2;2;1	98309000	118450000	96543000	Tetraspanin;Tetraspanin-4	TSPAN4	;;;;;	7	3	3	3	3	2	3	3	2	3	3	2	3	30.3	30.3	30.3	15.195	132	132;174;257;238;100;159;204	1	32	0	33.086	30.3	25	30.3	1258600000	122340000	83194000	107680000	1	2	0	20
E9PNA6;Q13488;E9PM12;E9PMC5;H0YCE3;Q13488-2	E9PNA6;Q13488;E9PM12;E9PMC5;H0YCE3	4;4;3;2;2;1	4;4;3;2;2;1	4;4;3;2;2;1	22854000	31775000	29137000	V-type proton ATPase subunit a;V-type proton ATPase 116 kDa subunit a isoform 3	TCIRG1	;;;;	6	4	4	4	2	3	2	2	3	2	2	3	2	21.4	21.4	21.4	33.777	299	299;830;217;174;290;614	1	22	0	5.0009	13.7	16.4	11	256610000	16788000	29268000	29726000	1	2	1	7
E9PNK6;E9PPQ1;J3KNE7;Q16890-5;Q16890;Q16890-4;Q16890-3;Q16890-2;E9PNQ9	E9PNK6;E9PPQ1;J3KNE7;Q16890-5;Q16890;Q16890-4;Q16890-3;Q16890-2;E9PNQ9	7;7;7;7;7;6;6;6;5	7;7;7;7;7;6;6;6;5	7;7;7;7;7;6;6;6;5	453960000	494370000	479850000	Tumor protein D53	TPD52L1	;;;;;;;;	9	7	7	7	6	7	6	6	7	6	6	7	6	42.8	42.8	42.8	18.661	166	166;191;209;175;204;102;131;144;92	1	122	0	36.66	34.3	42.8	34.3	6139900000	397820000	468570000	480940000	7	7	2	69
E9PNP3;Q9H7C9;E9PJP1;E9PLK9;K4DI89;E9PR47;Q9H7C9-3;Q9H7C9-2	E9PNP3;Q9H7C9;E9PJP1;E9PLK9;K4DI89;E9PR47;Q9H7C9-3;Q9H7C9-2	2;2;1;1;1;1;1;1	2;2;1;1;1;1;1;1	2;2;1;1;1;1;1;1	43711000	51617000	0	Mth938 domain-containing protein	AAMDC	;;;;;;;	8	2	2	2	2	2	1	2	2	1	2	2	1	18.4	18.4	18.4	15.588	141	141;122;93;137;147;168;88;118	1	30	0	5.2495	18.4	18.4	7.1	543390000	43144000	48805000	23178000	0	2	0	15
E9PNW4;E9PR17;P13987;H0YET2	E9PNW4;E9PR17;P13987;H0YET2	4;4;4;2	4;4;4;2	4;4;4;2	1251900000	1289700000	1253200000	CD59 glycoprotein	CD59	;;;	4	4	4	4	4	4	4	4	4	4	4	4	4	29.6	29.6	29.6	11.985	108	108;130;128;52	1	71	0	14.317	29.6	29.6	29.6	14910000000	1314100000	1211600000	1245000000	4	5	4	49
E9PNW8;Q8WVX9	E9PNW8;Q8WVX9	2;2	2;2	2;2	21413000	0	0	Fatty acyl-CoA reductase 1	FAR1	;	2	2	2	2	2	1	1	2	1	1	2	1	1	7.8	7.8	7.8	37.481	335	335;515	1	17	0	4.6164	7.8	3.9	3.9	195290000	20017000	15015000	13188000	1	0	0	3
E9PQ57;P78406;E9PPG9;B0QZ36;B0QZ37	E9PQ57;P78406;E9PPG9;B0QZ36	7;7;6;4;2	7;7;6;4;2	7;7;6;4;2	0	137480000	130020000	mRNA export factor	RAE1	;;;	5	7	7	7	6	4	5	6	4	5	6	4	5	27.9	27.9	27.9	47.831	437	437;368;217;137;87	1	65	0	30.523	21.3	18.8	21.7	1738000000	180060000	106190000	130670000	1	2	1	18
E9PQD0;E9PS30;E9PLI6;E9PS76;Q8N9N8	E9PQD0;E9PS30;E9PLI6;E9PS76;Q8N9N8	2;2;2;2;2	2;2;2;2;2	2;2;2;2;2	71667000	0	72439000	Probable RNA-binding protein EIF1AD	EIF1AD	;;;;	5	2	2	2	2	1	2	2	1	2	2	1	2	51.6	51.6	51.6	7.3314	64	64;78;113;114;165	1	29	0	22.149	51.6	26.6	51.6	826970000	73281000	20173000	59487000	1	0	1	14
E9PQM0;Q8WUK0-2;Q8WUK0-3;Q8WUK0	E9PQM0;Q8WUK0-2;Q8WUK0-3;Q8WUK0	2;2;2;2	2;2;2;2	2;2;2;2	18530000	20761000	24162000	Phosphatidylglycerophosphatase and protein-tyrosine phosphatase 1	PTPMT1	;;;	4	2	2	2	2	2	2	2	2	2	2	2	2	14.9	14.9	14.9	18.215	168	168;137;151;201	1	25	0	10.424	14.9	14.9	14.9	231590000	19220000	25807000	31360000	1	0	1	8
E9PQY2;Q9NQP4	E9PQY2;Q9NQP4	2;2	2;2	2;2	87273000	68919000	95245000	Prefoldin subunit 4	PFDN4	;	2	2	2	2	2	2	2	2	2	2	2	2	2	16.9	16.9	16.9	15.598	136	136;134	1	35	0	26.442	16.9	16.9	16.9	1070000000	36203000	74805000	98844000	0	0	1	12
E9PQY3;P11117;E9PHY0;B7Z7D2;F5GWV7;E9PP23;G5EA28;E9PKW9;E9PQW9;B7Z6U3;P11117-2	E9PQY3;P11117;E9PHY0;B7Z7D2;F5GWV7;E9PP23	11;11;10;8;7;6;3;3;3;3;3	11;11;10;8;7;6;3;3;3;3;3	11;11;10;8;7;6;3;3;3;3;3	640760000	667350000	560410000	Lysosomal acid phosphatase	ACP2	;;;;;	11	11	11	11	11	11	10	11	11	10	11	11	10	29.9	29.9	29.9	45.306	395	395;423;360;391;236;305;122;151;160;162;160	1	143	0	49.205	29.9	29.9	26.6	7343400000	674550000	609500000	551300000	9	7	10	85
E9PRM7;Q96BI1	E9PRM7;Q96BI1	2;2	2;2	2;2	63393000	0	52774000	Solute carrier family 22 member 18	SLC22A18	;	2	2	2	2	2	2	2	2	2	2	2	2	2	7.4	7.4	7.4	34.952	326	326;424	1	24	0	5.6217	7.4	7.4	7.4	624550000	75508000	59036000	46220000	1	0	1	8
E9PS17;E9PK59;Q96KG9-5;Q96KG9-3;Q96KG9-4;Q96KG9-6;Q96KG9-2;Q96KG9;E9PPN3;H0YCI6	E9PS17;E9PK59;Q96KG9-5;Q96KG9-3;Q96KG9-4;Q96KG9-6;Q96KG9-2;Q96KG9;E9PPN3	10;10;10;10;10;10;10;10;7;3	10;10;10;10;10;10;10;10;7;3	10;10;10;10;10;10;10;10;7;3	327460000	350550000	390160000	N-terminal kinase-like protein	SCYL1	;;;;;;;;	10	10	10	10	9	8	6	9	8	6	9	8	6	16.1	16.1	16.1	85.718	775	775;780;626;707;781;787;791;808;665;175	1	96	0	26.464	15.1	12.4	8.4	4326800000	368490000	344410000	334060000	2	5	4	42
E9PS74;Q8NBI5;E7EQD2;H0YD64	E9PS74;Q8NBI5;E7EQD2;H0YD64	3;3;3;2	3;3;3;2	3;3;3;2	53760000	51990000	53173000	Solute carrier family 43 member 3	SLC43A3	;;;	4	3	3	3	3	2	2	3	2	2	3	2	2	8.2	8.2	8.2	36.797	331	331;491;504;137	1	34	0	3.8744	8.2	5.4	5.4	714750000	57875000	31824000	28153000	0	0	2	15
E9PSH2;B1AP13;P08174-4;P08174;P08174-3;P08174-5;P08174-2;P08174-6;P08174-7;H3BLV0;B1AP15;H7BY55	E9PSH2;B1AP13;P08174-4;P08174;P08174-3;P08174-5;P08174-2;P08174-6;P08174-7;H3BLV0;B1AP15	19;19;19;19;19;19;19;19;19;18;10;6	19;19;19;19;19;19;19;19;19;18;10;6	19;19;19;19;19;19;19;19;19;18;10;6	5389900000	5788400000	5430600000	Complement decay-accelerating factor	CD55	;;;;;;;;;;	12	19	19	19	17	19	18	17	19	18	17	19	18	55.4	55.4	55.4	41.227	377	377;444;364;381;384;439;440;525;551;326;317;129	1	326	0	323.31	52	55.4	55.2	70654000000	6732400000	5502200000	4615400000	31	27	20	341
E9PSI1;E9PL78;E9PJM1;E9PMQ9;O15321-2;O15321;E9PQY7;E9PS99;G3V1B9;E9PNW2;E9PQI5;E9PJC4;E9PQ80;H0YI89	E9PSI1;E9PL78;E9PJM1;E9PMQ9;O15321-2;O15321;E9PQY7;E9PS99;G3V1B9	14;9;9;9;9;9;8;8;7;6;5;5;5;2	14;9;9;9;9;9;8;8;7;6;5;5;5;2	9;9;9;9;9;9;8;8;7;6;0;5;0;0	348220000	376020000	358080000	Transmembrane 9 superfamily member 1	TM9SF1	;;;;;;;;	14	14	14	9	12	12	11	12	12	11	8	8	7	20.2	20.2	12.5	92.386	815	815;300;420;589;489;606;242;257;519;207;166;210;213;61	1	170	0	119.02	19.1	19.1	18	4523900000	371180000	375170000	332990000	10	10	5	94
F2Z2U8;G8JLL9;Q7Z406;Q7Z406-6;Q7Z406-2;Q7Z406-5;Q7Z406-4;M0QY43	F2Z2U8;G8JLL9;Q7Z406;Q7Z406-6;Q7Z406-2;Q7Z406-5;Q7Z406-4;M0QY43	9;9;9;9;9;7;7;6	1;1;1;1;1;1;1;1	1;1;1;1;1;1;1;1	0	0	8417600	Myosin-14	MYH14	;;;;;;;	8	9	1	1	8	9	9	0	1	1	0	1	1	4.3	0.6	0.6	231.21	2028	2028;2036;1995;2003;2036;1478;1779;1002	1	4	0.0017496	2.6451	3.7	4.3	4.3	32865000	0	9122200	7868600	0	1	0	2
F2Z2V0;B0QZ18;Q99829;E7ENH5;A6PVH9;Q5JX58;Q5JX59;Q5JX60;Q5JX44;Q5JX45;Q5JX56;Q5JX61;Q5JX52;Q5JX55;Q5JX54;Q5JX57;E7EV27;H0Y524	F2Z2V0;B0QZ18;Q99829;E7ENH5;A6PVH9;Q5JX58;Q5JX59;Q5JX60;Q5JX44;Q5JX45;Q5JX56;Q5JX61;Q5JX52	7;7;7;6;6;5;5;5;5;5;4;4;4;3;2;2;2;2	7;7;7;6;6;5;5;5;5;5;4;4;4;3;2;2;2;2	7;7;7;6;6;5;5;5;5;5;4;4;4;3;2;2;2;2	447840000	408110000	411080000	Copine-1	CPNE1	;;;;;;;;;;;;	18	7	7	7	7	7	6	7	7	6	7	7	6	12.6	12.6	12.6	58.634	533	533;542;537;427;481;201;209;231;304;386;174;213;305;152;136;137;138;208	1	104	0	15.368	12.6	12.6	11.3	5411100000	487270000	441650000	363590000	5	4	5	52
F5GWH5;P61165	F5GWH5;P61165	1;1	1;1	1;1	95285000	85839000	79796000	Transmembrane protein 258	TMEM258	;	2	1	1	1	1	1	1	1	1	1	1	1	1	16.3	16.3	16.3	5.7065	49	49;79	1	30	0.00938	1.7356	16.3	16.3	16.3	1202600000	111550000	90241000	90827000	1	2	1	17
F5GWJ1;O60245;O60245-2;H0YAH0	F5GWJ1;O60245;O60245-2;H0YAH0	13;13;13;7	13;13;13;7	13;13;13;7	299030000	291540000	295130000	Protocadherin-7	PCDH7	;;;	4	13	13	13	9	7	11	9	7	11	9	7	11	15	15	15	136.57	1255	1255;1069;1072;937	1	111	0	62.052	10.4	7.2	12	3734800000	311230000	251530000	330680000	3	5	4	55
F5GWP8;C9JK18;C9JKY1;C9JTX4;C9J826;C9JPI2;K7ERP3	F5GWP8	40;13;13;12;12;3;3	40;13;13;12;12;3;3	0;0;0;0;0;0;0	8788300000	9457800000	9161200000		KRT17		7	40	40	0	37	38	37	37	38	37	0	0	0	73.3	73.3	0	66.35	591	591;295;297;235;276;86;104	1	813	0	323.31	67.7	69.4	67.3	105410000000	8874000000	8736700000	8110900000	46	44	47	511
F5GWS3;Q6P9B6;H3BM75;H3BUB0	F5GWS3;Q6P9B6	5;5;2;1	5;5;2;1	5;5;2;1	58037000	50256000	65496000	TLD domain-containing protein 1	TLDC1	;	4	5	5	5	3	3	3	3	3	3	3	3	3	18.2	18.2	18.2	48.035	429	429;456;193;148	1	44	0	10.515	10.5	10.5	12.1	705440000	52515000	24264000	80404000	1	1	0	10
F5GWT4;F5H2M7;Q9H4A3-2;Q9H4A3;Q9H4A3-5;Q9H4A3-6;Q9H4A3-7;Q9H4A3-4;F6UYG0;K7ENT7;Q96J92-2;Q96J92-3;Q96J92	F5GWT4;F5H2M7;Q9H4A3-2;Q9H4A3;Q9H4A3-5;Q9H4A3-6;Q9H4A3-7	17;17;17;17;17;17;17;8;7;1;1;1;1	17;17;17;17;17;17;17;8;7;1;1;1;1	15;15;15;15;15;15;15;8;5;1;1;1;1	260840000	278540000	243230000	Serine/threonine-protein kinase WNK1	WNK1	;;;;;;	13	17	17	15	12	12	12	12	12	12	10	11	12	9.7	9.7	8.7	225.5	2134	2134;2880;2135;2382;2634;2642;2833;1975;393;469;663;1165;1243	1	147	0	39.496	7	6.8	7.2	3180900000	255400000	266370000	279860000	5	5	4	69
F5GWX5;Q14839;Q14839-2;Q8TDI0;Q12873-2;Q12873;Q12873-3;K7EMY3;Q5TG85;F5H6N4;F2Z2R5;K7EPV1;K7ESA5;I3L229;H7C3H7;H7C0J3	F5GWX5;Q14839;Q14839-2	44;44;44;9;9;9;9;7;6;3;3;1;1;1;1;1	44;44;44;9;9;9;9;7;6;3;3;1;1;1;1;1	44;44;44;9;9;9;9;7;6;3;3;1;1;1;1;1	694760000	753270000	751960000	Chromodomain-helicase-DNA-binding protein 4	CHD4	;;	16	44	44	44	27	31	30	27	31	30	27	31	30	32.4	32.4	32.4	217.1	1905	1905;1912;1940;1954;1966;2000;2059;1060;808;354;1225;63;127;249;277;383	1	392	0	173.05	20.1	21.1	20.8	8878200000	665890000	710740000	721990000	6	13	18	151
F5GWY5;O00592-2;O00592;F5H7A2	F5GWY5;O00592-2;O00592;F5H7A2	8;8;8;7	8;8;8;7	8;8;8;7	1146000000	1300800000	1196900000	Podocalyxin	PODXL	;;;	4	8	8	8	6	7	6	6	7	6	6	7	6	18.4	18.4	18.4	58.865	560	560;526;558;526	1	94	0	82.627	13	18.2	14.5	14495000000	1154100000	1110100000	1129200000	4	7	4	60
F5GXF0;P22736;P22736-2	F5GXF0;P22736;P22736-2	3;3;3	3;3;3	3;3;3	27429000	14907000	0	Nuclear receptor subfamily 4 group A member 1	NR4A1	;;	3	3	3	3	3	2	1	3	2	1	3	2	1	5.4	5.4	5.4	70.451	652	652;598;611	1	26	0	4.9455	5.4	3.4	1.7	234170000	28155000	11427000	8526800	2	1	0	11
F5GXX5;P61803;F5H895	F5GXX5;P61803;F5H895	4;4;2	4;4;2	4;4;2	782570000	863100000	754540000	Dolichyl-diphosphooligosaccharide--protein glycosyltransferase subunit DAD1	DAD1	;;	3	4	4	4	4	4	3	4	4	3	4	4	3	47.1	47.1	47.1	9.5541	85	85;113;65	1	62	0	20.115	47.1	47.1	37.6	9037200000	760580000	856480000	692140000	3	2	2	33
F5GYC1;E7EUE1;P28288;P28288-2;P28288-3	F5GYC1;E7EUE1;P28288;P28288-2	13;13;13;8;2	13;13;13;8;2	13;13;13;8;2	178600000	208960000	231100000	ATP-binding cassette sub-family D member 3	ABCD3	;;;	5	13	13	13	7	9	10	7	9	10	7	9	10	24.2	24.2	24.2	67.315	586	586;683;659;549;236	1	130	0	55.948	14.2	16.9	18.3	2507000000	157970000	219670000	235540000	5	3	7	68
F5GYC4;B4DG22;B7ZB17;P51812;B1AXG1;B1AXG2;Q9UK32;B7ZL90;D6R910;D6RHW7;D6RA62;Q5TI62;D6RE03	F5GYC4;B4DG22;B7ZB17;P51812	16;16;16;16;5;3;3;3;2;1;1;1;1	16;16;16;16;5;3;3;3;2;1;1;1;1	12;12;12;12;2;2;1;1;0;0;0;0;0	313090000	289500000	335240000	Ribosomal protein S6 kinase alpha-3	RPS6KA3	;;;	13	16	16	12	11	11	11	11	11	11	8	8	8	27.9	27.9	21.8	80.622	710	710;711;712;740;227;133;745;745;125;96;141;166;171	1	171	0	22.048	17.7	16.9	16.9	3875000000	326540000	255610000	292910000	5	6	5	62
F5GYJ5;Q9NX18;F8W679;M0QYN2;F5GXW4;M0R060;F5H5T6;F5H8E2	F5GYJ5;Q9NX18;F8W679;M0QYN2;F5GXW4;M0R060;F5H5T6	4;4;2;2;2;2;2;1	4;4;2;2;2;2;2;1	4;4;2;2;2;2;2;1	79706000	0	107000000	Succinate dehydrogenase assembly factor 2, mitochondrial	SDHAF2	;;;;;;	8	4	4	4	3	2	3	3	2	3	3	2	3	31.2	31.2	31.2	18.388	154	154;166;129;133;133;141;163;88	1	32	0	11.333	25.3	17.5	18.8	885010000	89966000	39245000	88938000	1	0	2	12
F5GYK2;Q9NRL3;F8VYA6;M0R317;M0QZM0	F5GYK2;Q9NRL3;F8VYA6;M0R317	6;6;6;5;2	6;6;6;5;2	5;5;5;4;2	107820000	104800000	112780000	Striatin-4	STRN4	;;;	5	6	6	5	5	2	2	5	2	2	4	1	1	18.8	18.8	17.2	68.584	634	634;753;760;198;317	1	57	0	8.8047	14.5	3.6	3.6	1124800000	125270000	90048000	88574000	1	2	2	29
F5GYQ1;P61421;J3QL14;R4GN72;H3BQB4;H3BSG7;H3BQJ1	F5GYQ1;P61421;J3QL14;R4GN72	7;7;5;5;2;2;1	7;7;5;5;2;2;1	7;7;5;5;2;2;1	172870000	205020000	211310000	V-type proton ATPase subunit d 1	ATP6V0D1	;;;	7	7	7	7	6	4	7	6	4	7	6	4	7	29.6	29.6	29.6	44.659	392	392;351;232;274;113;115;227	1	79	0	48.276	27.8	17.6	29.6	2208100000	166020000	157930000	204080000	3	1	6	43
F5GZP8;Q5JVZ5;B4DRL5;Q7Z5G9;Q96JJ3;B4DZ20;Q5JW01;H0YCM7;Q5JVZ8;Q5JVZ4	F5GZP8;Q5JVZ5;B4DRL5;Q7Z5G9;Q96JJ3;B4DZ20;Q5JW01;H0YCM7	5;5;5;5;5;4;3;3;2;1	5;5;5;5;5;4;3;3;2;1	5;5;5;5;5;4;3;3;2;1	0	42118000	0	Engulfment and cell motility protein 2	ELMO2	;;;;;;;	10	5	5	5	3	3	2	3	3	2	3	3	2	14.5	14.5	14.5	62.135	537	537;718;732;632;720;452;283;441;267;338	1	33	0	20.23	9.3	7.6	7.8	455850000	35288000	38413000	41530000	1	1	1	13
F5GZS6;P08195;J3KPF3;P08195-3;P08195-4;H0YFS2;F5GZI0;H0YFX4	F5GZS6;P08195;J3KPF3;P08195-3;P08195-4	33;33;32;32;32;11;8;4	33;33;32;32;32;11;8;4	2;2;1;1;1;0;0;0	13067000000	13533000000	14238000000	4F2 cell-surface antigen heavy chain	SLC3A2	;;;;	8	33	33	2	31	25	29	31	25	29	1	0	1	56.9	56.9	5.7	64.872	599	599;630;631;568;661;247;175;122	1	717	0	323.31	54.1	47.2	51.9	162720000000	13318000000	10442000000	13541000000	45	37	38	545
F5GZU5;G3V1P5;Q96RN5-3;Q96RN5-2;Q96RN5;B4DM43;H7C308	F5GZU5;G3V1P5;Q96RN5-3;Q96RN5-2;Q96RN5;B4DM43;H7C308	2;2;2;2;2;1;1	2;2;2;2;2;1;1	2;2;2;2;2;1;1	0	0	20482000	Mediator of RNA polymerase II transcription subunit 15	MED15	;;;;;;	7	2	2	2	0	1	2	0	1	2	0	1	2	4.4	4.4	4.4	71.462	637	637;722;677;748;788;189;194	1	15	0.0044939	2.0489	0	2.8	4.4	141520000	0	11564000	18841000	0	0	0	5
F5H012;P19474;P19474-2;H0YDP8	F5H012;P19474;P19474-2	13;13;11;3	13;13;11;3	13;13;11;3	266640000	251190000	311990000	E3 ubiquitin-protein ligase TRIM21	TRIM21	;;	4	13	13	13	10	6	6	10	6	6	10	6	6	34.5	34.5	34.5	54.081	475	475;475;398;90	1	116	0	97.346	26.9	18.3	16.4	3660100000	267600000	243830000	220760000	6	2	1	46
F5H0B0;H0YC44;P55327-8;H0YC42;U3KQQ8	F5H0B0;H0YC44;P55327-8	10;5;5;2;1	2;0;0;2;1	0;0;0;0;0	47289000	34323000	43427000	Tumor protein D52	TPD52	;;	5	10	2	0	9	9	7	2	2	2	0	0	0	42.8	7.6	0	31.17	278	278;148;151;94;83	1	25	0	4.9827	41.4	41.4	29.9	505990000	50532000	28383000	39830000	1	0	0	7
F5H0L8;Q9Y6Y8;Q9Y6Y8-2;H7C0V8;H7C4C4	F5H0L8;Q9Y6Y8;Q9Y6Y8-2	10;10;9;3;2	10;10;9;3;2	10;10;9;3;2	123960000	75436000	91874000	SEC23-interacting protein	SEC23IP	;;	5	10	10	10	8	6	7	8	6	7	8	6	7	16.7	16.7	16.7	89.666	789	789;1000;924;194;153	1	71	0	17.608	14.1	9.5	11.7	1118800000	142390000	63161000	112140000	2	3	1	32
F5H144;Q9Y653-5;Q9Y653-2;Q9Y653-3;Q9Y653;H3BSJ6;H3BRH0;Q9Y653-4;H3BNH4;H3BV52	F5H144;Q9Y653-5;Q9Y653-2;Q9Y653-3;Q9Y653;H3BSJ6;H3BRH0;Q9Y653-4	5;5;5;5;5;3;3;3;1;1	5;5;5;5;5;3;3;3;1;1	5;5;5;5;5;3;3;3;1;1	122860000	115820000	118770000	G-protein coupled receptor 56;GPR56 N-terminal fragment;GPR56 C-terminal fragment	GPR56;ADGRG1	;;;;;;;	10	5	5	5	4	4	5	4	4	5	4	4	5	12.5	12.5	12.5	57.375	512	512;518;687;692;693;187;256;523;198;199	1	69	0	16.514	10.2	10.2	12.5	1486500000	119590000	101090000	125890000	1	1	2	20
F5H170;Q8WW22-3;Q8WW22;Q8WW22-2	F5H170;Q8WW22-3;Q8WW22;Q8WW22-2	2;2;2;2	2;2;2;2	2;2;2;2	58974000	277060000	0	DnaJ homolog subfamily A member 4	DNAJA4	;;;	4	2	2	2	2	2	0	2	2	0	2	2	0	4.1	4.1	4.1	24.377	219	219;370;397;426	1	22	0.0093586	1.7043	4.1	4.1	0	1557500000	65484000	209480000	0	1	2	0	11
F5H1F6;F5H4M0;Q9H9H4	F5H1F6;F5H4M0;Q9H9H4	5;5;5	5;5;5	5;5;5	21384000	0	0	Vacuolar protein sorting-associated protein 37B	VPS37B	;;	3	5	5	5	4	2	1	4	2	1	4	2	1	40.2	40.2	40.2	20.654	184	184;271;285	1	27	0	3.8773	29.3	10.3	6	247470000	26028000	22999000	5867900	4	0	0	8
F5H1G9;F8WA55;F8WA56;A6NFN2;Q8IZP0-10;Q8IZP0-8;Q8IZP0-7;Q8IZP0-2;Q8IZP0-4;Q8IZP0-3;Q8IZP0-5;Q8IZP0-6;Q8IZP0-9;Q8IZP0;Q8IZP0-12;Q8IZP0-11;E9PEZ7;E7EW77;E7EP65;J3KNB2;Q9NYB9-3;Q9NYB9-2;Q9NYB9-4;Q9NYB9;H0Y6B5;F8WAL6	F5H1G9;F8WA55;F8WA56;A6NFN2;Q8IZP0-10;Q8IZP0-8;Q8IZP0-7;Q8IZP0-2;Q8IZP0-4;Q8IZP0-3;Q8IZP0-5;Q8IZP0-6;Q8IZP0-9;Q8IZP0;Q8IZP0-12;Q8IZP0-11	8;8;8;8;8;8;8;8;8;8;8;8;8;8;7;6;2;2;2;2;2;2;2;2;1;1	8;8;8;8;8;8;8;8;8;8;8;8;8;8;7;6;2;2;2;2;2;2;2;2;1;1	8;8;8;8;8;8;8;8;8;8;8;8;8;8;7;6;2;2;2;2;2;2;2;2;1;1	114670000	115240000	118770000	Abl interactor 1	ABI1	;;;;;;;;;;;;;;;	26	8	8	8	4	4	3	4	4	3	4	4	3	26.9	26.9	26.9	43.473	394	394;423;482;509;388;393;422;446;451;452;476;480;481;508;496;329;458;480;486;513;401;475;507;513;293;299	1	52	0	19.025	14.7	11.9	10.2	1438000000	104790000	105790000	96900000	2	0	1	28
F5H1H0;F5H025;P32004-3;P32004-2;P32004;H0Y5C3;E7EVM4;E7EPI4;E9PHJ4;H3BLW5	F5H1H0;F5H025;P32004-3;P32004-2;P32004	35;35;35;35;35;6;4;4;3;1	35;35;35;35;35;6;4;4;3;1	32;32;32;32;32;6;1;1;0;1	2824200000	2798000000	3031700000	Neural cell adhesion molecule L1	L1CAM	;;;;	10	35	35	32	30	29	32	30	29	32	27	26	29	37.4	37.4	35.4	139.67	1255	1255;1259;1248;1253;1257;190;128;150;83;153	1	531	0	323.31	31.3	29.2	33.1	34856000000	2857300000	2568400000	2948000000	25	21	30	318
F5H1S8;Q14165;H0YG07;F5GX14	F5H1S8;Q14165;H0YG07	6;6;3;2	6;6;3;2	6;6;3;2	198710000	202540000	196240000	Malectin	MLEC	;;	4	6	6	6	6	6	5	6	6	5	6	6	5	54.1	54.1	54.1	16.729	146	146;292;173;217	1	78	0	11.132	54.1	54.1	49.3	2431800000	226460000	196960000	181140000	3	3	3	33
F5H1S9;G8JLB3;Q9Y606-2;Q9Y606;F5GY32	F5H1S9;G8JLB3;Q9Y606-2;Q9Y606	4;4;4;4;1	4;4;4;4;1	4;4;4;4;1	42385000	44006000	37316000	tRNA pseudouridine synthase;tRNA pseudouridine synthase A, mitochondrial	PUS1	;;;	5	4	4	4	4	4	3	4	4	3	4	4	3	11.8	11.8	11.8	41.729	374	374;384;399;427;153	1	38	0	5.032	11.8	11.8	8.3	507590000	55608000	42486000	31018000	0	1	0	7
F5H1Y4;Q9HD26-2;Q9HD26;Q9HD26-3	F5H1Y4;Q9HD26-2;Q9HD26;Q9HD26-3	12;12;12;7	12;12;12;7	12;12;12;7	184590000	202630000	190350000	Golgi-associated PDZ and coiled-coil motif-containing protein	GOPC	;;;	4	12	12	12	8	8	6	8	8	6	8	8	6	36.4	36.4	36.4	50.584	462	462;454;462;319	1	98	0	55.786	21.9	22.3	14.9	2486300000	214020000	157990000	123740000	3	4	1	53
F5H1Z7;Q99985;B4DRL8	F5H1Z7;Q99985	8;8;2	8;8;2	8;8;2	114670000	99568000	99361000	Semaphorin-3C	SEMA3C	;	3	8	8	8	5	3	6	5	3	6	5	3	6	15.2	15.2	15.2	87.284	769	769;751;233	1	57	0	21.125	10.1	7	11.8	1290600000	125110000	59292000	125930000	1	2	2	26
F5H2A7;P61758	F5H2A7;P61758	9;9	9;9	9;9	478050000	504900000	575180000	Prefoldin subunit 3	VBP1	;	2	9	9	9	7	6	7	7	6	7	7	6	7	45.3	45.3	45.3	22.286	192	192;197	1	114	0	55.995	35.4	30.7	35.4	6489100000	520160000	456720000	552470000	4	3	2	44
F5H2H5;Q86XL3;Q86XL3-2;F5H6J0;F5H417;F5H1D4;Q86XL3-3	F5H2H5;Q86XL3;Q86XL3-2	9;9;7;2;2;1;1	9;9;7;2;2;1;1	9;9;7;2;2;1;1	78262000	86882000	85615000	Ankyrin repeat and LEM domain-containing protein 2	ANKLE2	;;	7	9	9	9	5	5	5	5	5	5	5	5	5	16	16	16	97.722	876	876;938;648;129;251;258;293	1	65	0	21.491	8.9	8.9	9.7	1058400000	73251000	88939000	68793000	2	2	1	31
F5H2J3;Q96GC9;K7EL93;K7EL74;K7ENU2;K7EK01;K7EMI0;K7ELS2;K7EL46;K7EPE7;B4DED7;B4DGZ7;B4DVV9	F5H2J3;Q96GC9;K7EL93;K7EL74;K7ENU2;K7EK01;K7EMI0;K7ELS2	3;3;2;2;2;2;2;2;1;1;1;1;1	3;3;2;2;2;2;2;2;1;1;1;1;1	3;3;2;2;2;2;2;2;1;1;1;1;1	54936000	63967000	57954000	Vacuole membrane protein 1	VMP1	;;;;;;;	13	3	3	3	2	3	2	2	3	2	2	3	2	15.1	15.1	15.1	40.075	350	350;406;74;75;78;92;138;167;58;225;272;309;214	1	32	0	5.2626	10.6	15.1	6.6	751490000	48288000	66061000	34067000	0	1	1	14
F5H2S7;Q13561;Q13561-3;Q13561-2;F5H223;H0YI98;F8W1I6;F8VW18;F8VX93;F8VRV7;H0YHL1;F8W0U6	F5H2S7;Q13561;Q13561-3;Q13561-2;F5H223;H0YI98;F8W1I6	17;17;17;17;16;12;12;8;4;4;3;1	17;17;17;17;16;12;12;8;4;4;3;1	17;17;17;17;16;12;12;8;4;4;3;1	882920000	896410000	887100000	Dynactin subunit 2	DCTN2	;;;;;;	12	17	17	17	11	11	13	11	11	13	11	11	13	62.3	62.3	62.3	44.809	406	406;401;403;406;378;268;315;278;135;152;128;45	1	218	0	134.88	39.7	36.2	43.3	10788000000	801900000	806840000	796140000	7	8	6	88
F5H2V0;D3YTF9;Q9NNW7;F5H1L4;E7ENA2;D3YTF8;Q9NNW7-2;E7EWK1;Q9NNW7-3;Q9NNW7-4	F5H2V0;D3YTF9;Q9NNW7;F5H1L4;E7ENA2;D3YTF8;Q9NNW7-2;E7EWK1;Q9NNW7-3	13;13;13;12;12;12;12;10;8;4	12;12;12;11;11;11;11;9;8;4	12;12;12;11;11;11;11;9;8;4	112720000	103750000	101810000	Thioredoxin reductase 2, mitochondrial	TXNRD2	;;;;;;;;	10	13	12	12	10	8	4	9	7	3	9	7	3	42.6	39.7	39.7	56.228	521	521;523;524;492;494;499;498;338;428;277	1	79	0	20.128	34.5	22.1	9.4	1198500000	145420000	91386000	50847000	4	1	1	28
F5H2V5;E9PS00;Q9Y5Q0;E9PPZ4;E9PQC2;E9PKP8	F5H2V5;E9PS00;Q9Y5Q0	3;3;3;1;1;1	3;3;3;1;1;1	3;3;3;1;1;1	0	0	41186000	Fatty acid desaturase 3	FADS3	;;	6	3	3	3	2	1	3	2	1	3	2	1	3	9.1	9.1	9.1	43.649	385	385;417;445;188;199;330	1	19	0.00025873	3.1313	6.5	2.6	9.1	378210000	55489000	9405000	60819000	0	0	1	5
F5H315;Q9HCS7	F5H315;Q9HCS7	3;3	3;3	3;3	0	34267000	30311000	Pre-mRNA-splicing factor SYF1	XAB2	;	2	3	3	3	2	3	2	2	3	2	2	3	2	4.5	4.5	4.5	99.679	852	852;855	1	25	0	10.547	3.3	4.5	2.5	328480000	27140000	43770000	24712000	0	1	1	7
F5H325;P34059	F5H325;P34059	2;2	2;2	2;2	14672000	0	0	N-acetylgalactosamine-6-sulfatase	GALNS	;	2	2	2	2	2	1	1	2	1	1	2	1	1	5.4	5.4	5.4	49.794	447	447;522	1	19	0.00026582	3.457	5.4	2	2	126940000	14714000	8141900	7548300	1	1	1	11
F5H357;B4E3T4;Q93062-4;Q93062-5;Q93062;Q93062-2;Q93062-3;H0YBU9;Q6ZRY4	F5H357;B4E3T4;Q93062-4;Q93062-5;Q93062;Q93062-2;Q93062-3	3;3;3;3;3;3;3;1;1	3;3;3;3;3;3;3;1;1	3;3;3;3;3;3;3;1;1	17314000	20779000	0	RNA-binding protein with multiple splicing	RBPMS	;;;;;;	9	3	3	3	3	2	1	3	2	1	3	2	1	23.5	23.5	23.5	17.135	153	153;224;143;152;196;204;219;119;209	1	27	0	6.9173	23.5	13.7	4.6	202410000	22748000	17614000	4862900	2	0	0	10
F5H365;Q15436;F5H6C4;B3KXI2;G3V5X8;G3V4Q2;G3V4V1;G3V1W4;G3V3G5;G3V2R6;G3V5K1	F5H365;Q15436;F5H6C4;B3KXI2	26;26;21;20;4;4;4;4;4;4;2	26;26;21;20;4;4;4;4;4;4;2	24;24;20;19;3;3;3;3;3;3;1	1175600000	1173700000	1157200000	Protein transport protein Sec23A	SEC23A	;;;	11	26	26	24	24	17	21	24	17	21	22	15	19	50.5	50.5	47.3	82.968	736	736;765;663;563;85;86;93;108;140;169;40	1	336	0	323.01	46.3	31.8	39.8	14313000000	1267000000	875930000	1150800000	18	12	12	182
F5H442;Q99816;Q99816-2;J3QRU6;J3QKS4	F5H442;Q99816	7;7;3;1;1	7;7;3;1;1	7;7;3;1;1	76940000	123690000	99834000	Tumor susceptibility gene 101 protein	TSG101	;	5	7	7	7	5	4	3	5	4	3	5	4	3	27.4	27.4	27.4	40.917	365	365;390;285;63;77	1	45	0	35.471	16.7	13.7	9.9	1152900000	121260000	117170000	75609000	2	2	1	16
F5H4G7;F5GYL8;O60684;Q5TFJ7;O15131;S4R3E5	F5H4G7;F5GYL8;O60684	15;15;15;7;7;4	15;15;15;7;7;4	9;9;9;3;2;4	360600000	434350000	413230000	Importin subunit alpha-7	KPNA6	;;	6	15	15	9	10	8	10	10	8	10	5	3	5	34.9	34.9	25.3	59.667	533	533;541;536;321;536;186	1	162	0	104.97	27.2	20.5	27.2	5106800000	388460000	356250000	351900000	8	7	5	94
F5H4J2;O75381-2;O75381	F5H4J2;O75381-2;O75381	5;5;5	5;5;5	5;5;5	99334000	112740000	123240000	Peroxisomal membrane protein PEX14	PEX14	;;	3	5	5	5	5	3	5	5	3	5	5	3	5	22	22	22	34.216	313	313;334;377	1	64	0	11.438	22	8	22	1230300000	70242000	37848000	106090000	3	2	2	28
F5H4K0;Q5T9L3;Q5T9L3-2;Q5T9L3-3;E9PM62;E9PKJ0;E9PJW4;H0YCG9;E9PQK1;Q7Z430;E9PM23;H0YDL2	F5H4K0;Q5T9L3;Q5T9L3-2;Q5T9L3-3;E9PM62;E9PKJ0;E9PJW4;H0YCG9	7;7;7;6;5;4;4;4;3;2;1;1	7;7;7;6;5;4;4;4;3;2;1;1	7;7;7;6;5;4;4;4;3;2;1;1	192640000	225210000	228490000	Protein wntless homolog	WLS	;;;;;;;	12	7	7	7	7	7	6	7	7	6	7	7	6	14.7	14.7	14.7	62.719	545	545;541;543;450;222;122;134;200;152;127;38;152	1	89	0	13.556	14.7	14.7	13	2565200000	206080000	194510000	209180000	4	4	3	41
F5H4Z3;Q5QPM7;Q92530;H0Y555;Q5QPM9;E7ER20	F5H4Z3;Q5QPM7;Q92530;H0Y555;Q5QPM9;E7ER20	2;2;2;1;1;1	2;2;2;1;1;1	2;2;2;1;1;1	69349000	48939000	63708000	Proteasome inhibitor PI31 subunit	PSMF1	;;;;;	6	2	2	2	2	2	2	2	2	2	2	2	2	15.4	15.4	15.4	19.29	175	175;263;271;107;183;201	1	36	0	5.6877	15.4	15.4	15.4	802520000	64529000	57583000	62391000	0	2	2	14
F5H569;Q93050-1;Q93050;Q93050-3;B7Z641;B7Z2A9;K7EM24;K7EN36;K7EPG4;F5H1T6	F5H569;Q93050-1;Q93050;Q93050-3;B7Z641;B7Z2A9	4;4;4;4;3;3;1;1;1;1	4;4;4;4;3;3;1;1;1;1	3;3;3;3;2;2;1;1;1;0	52861000	51377000	55886000	V-type proton ATPase 116 kDa subunit a isoform 1;V-type proton ATPase subunit a	ATP6V0A1	;;;;;	10	4	4	3	2	3	4	2	3	4	1	2	3	5.7	5.7	4.8	96.313	837	837;831;837;838;788;794;130;195;198;483	1	42	0	7.1765	2.9	4.7	5.7	523090000	23421000	45661000	49332000	2	1	2	15
F5H577;Q8WUW1;Q8WUW1-2	F5H577;Q8WUW1;Q8WUW1-2	3;3;3	3;3;3	3;3;3	105970000	80411000	79986000	Protein BRICK1	BRK1	;;	3	3	3	3	3	3	3	3	3	3	3	3	3	30.5	30.5	30.5	11.945	105	105;75;106	1	33	0	8.8139	30.5	30.5	30.5	1104200000	104440000	88058000	91084000	1	1	1	10
F5H5D3;Q9BQE3;F8VVB9;F8VS66;F8VRZ4;F8VWV9;F8VX09;C9K0S6;F8VRK0;F8W0F6;Q9H853;F8VXZ7	F5H5D3;Q9BQE3;F8VVB9	29;29;15;8;7;5;4;2;2;2;2;1	2;2;0;0;0;0;0;0;0;0;0;0	2;2;0;0;0;0;0;0;0;0;0;0	1198500000	1164400000	1273500000	Tubulin alpha-1C chain	TUBA1C;TUBA1B	;;	12	29	2	2	26	24	24	2	2	2	2	2	2	66.1	7.9	7.9	57.73	519	519;449;246;130;112;81;75;47;49;231;241;26	1	90	0	188.27	66.1	59.7	59.7	15722000000	1323600000	1287600000	492400000	5	7	7	79
F5H5I6;H0Y8R1;H0YAK1;Q12849-5;Q12849;H0YAM1	F5H5I6;H0Y8R1;H0YAK1;Q12849-5;Q12849	12;12;12;12;12;4	12;12;12;12;12;4	12;12;12;12;12;4	237240000	211100000	247420000	G-rich sequence factor 1	GRSF1	;;;;	6	12	12	12	11	9	9	11	9	9	11	9	9	49.7	49.7	49.7	41.634	362	362;417;453;318;480;114	1	112	0	52.028	47.5	37.3	34	2881100000	311980000	193640000	299880000	6	3	8	60
F5H5Y2;P43307-2;P43307;C9J3L8;C9J5W0;E9PAL7;C9IZQ1;C9JBX5;C9JY01	F5H5Y2;P43307-2;P43307;C9J3L8;C9J5W0;E9PAL7;C9IZQ1	6;6;6;5;5;5;5;2;1	6;6;6;5;5;5;5;2;1	6;6;6;5;5;5;5;2;1	1129000000	1148800000	1316000000	Translocon-associated protein subunit alpha	SSR1	;;;;;;	9	6	6	6	6	5	6	6	5	6	6	5	6	29.7	29.7	29.7	29.42	259	259;259;286;265;266;291;298;218;103	1	118	0	129.1	29.7	29.7	29.7	13931000000	1358600000	786670000	899540000	8	6	6	91
F5H619;Q86XA9-2;Q86XA9;B5MC49;H7C5W6;E9PB09;F8VQQ6;H0YIW3;Q86XA9-3	F5H619;Q86XA9-2;Q86XA9;B5MC49;H7C5W6;E9PB09	7;7;7;6;4;4;2;2;2	7;7;7;6;4;4;2;2;2	6;6;6;5;4;4;1;2;1	0	38418000	0	HEAT repeat-containing protein 5A	HEATR5A	;;;;;	9	7	7	6	3	2	2	3	2	2	3	2	2	5	5	3.9	222.7	2046	2046;1965;2040;1140;1599;1753;87;896;113	1	39	0	7.0311	1.5	1.5	1.5	357950000	24552000	29512000	35592000	1	1	0	9
F5H698;Q9P2J5;B4DER1;B4DJ10	F5H698;Q9P2J5;B4DER1;B4DJ10	42;42;41;41	42;42;41;41	42;42;41;41	2010400000	2053200000	1985100000	Leucine--tRNA ligase, cytoplasmic	LARS	;;;	4	42	42	42	35	36	33	35	36	33	35	36	33	46.9	46.9	46.9	129.21	1130	1130;1176;1149;1122	1	507	0	241.88	39.1	38.9	35.6	25222000000	2041200000	1985000000	1685300000	30	23	22	309
F5H6E2;O00159-3;O00159;O00159-2;I3L501;I3L204;I3L168;I3L3F5;I3L4D4;I3L3Y6	F5H6E2;O00159-3;O00159;O00159-2	17;17;17;16;3;3;2;2;2;2	17;17;17;16;3;3;2;2;2;2	17;17;17;16;3;3;2;2;2;2	201410000	178550000	169250000	Unconventional myosin-Ic	MYO1C	;;;	10	17	17	17	8	10	11	8	10	11	8	10	11	23	23	23	118.99	1039	1039;1044;1063;1028;168;267;134;137;164;170	1	144	0	47.083	9.6	13.2	15	2366500000	133530000	185670000	193930000	4	5	6	65
F5H6I0;P61769	F5H6I0;P61769	4;4	4;4	1;1	5882700000	6532000000	5439400000	Beta-2-microglobulin;Beta-2-microglobulin form pI 5.3	B2M	;	2	4	4	1	4	3	3	4	3	3	1	1	1	53.3	53.3	18	13.972	122	122;119	1	83	0	56.628	53.3	34.4	34.4	72760000000	6085700000	6482300000	5374900000	7	5	6	70
F5H6U7;Q9Y3E0;G3V1U5;F5GWD8;F5GXH6	F5H6U7;Q9Y3E0;G3V1U5	3;3;2;1;1	3;3;2;1;1	3;3;2;1;1	89190000	218190000	105160000	Vesicle transport protein GOT1B	GOLT1B	;;	5	3	3	3	2	2	3	2	2	3	2	2	3	18.8	18.8	18.8	14.307	128	128;138;74;40;42	1	59	0	20.312	11.7	18	18.8	1594500000	82476000	189790000	115590000	4	4	3	47
F5H6Y0;H3BMM5;Q96AX1;F5H7N5	F5H6Y0;H3BMM5;Q96AX1	4;4;4;1	4;4;4;1	4;4;4;1	19722000	28527000	0	Vacuolar protein sorting-associated protein 33A	VPS33A	;;	4	4	4	4	3	2	1	3	2	1	3	2	1	23.7	23.7	23.7	21.226	186	186;538;596;42	1	38	0	5.5082	19.9	10.8	4.8	249070000	20564000	23118000	13838000	2	1	1	19
F5H715;Q96BJ3;Q96BJ3-2;Q96BJ3-3	F5H715;Q96BJ3	7;7;3;3	7;7;3;3	7;7;3;3	89833000	74038000	82343000	Axin interactor, dorsalization-associated protein	AIDA	;	4	7	7	7	6	5	5	6	5	5	6	5	5	35.5	35.5	35.5	32.021	282	282;306;141;224	1	66	0	13.821	29.1	21.6	24.8	1049900000	112060000	69941000	81540000	4	2	0	22
F5H7B0;Q15477;H7C5N0;H7C4L3	F5H7B0;Q15477	13;13;2;1	13;13;2;1	13;13;2;1	96597000	94484000	113990000	Helicase SKI2W	SKIV2L	;	4	13	13	13	8	7	9	8	7	9	8	7	9	16	16	16	116.48	1053	1053;1246;156;182	1	107	0	22.482	9.2	7.7	10.4	1369900000	104970000	54821000	130340000	4	0	2	24
F5H843;O60669	F5H843;O60669	2;2	2;2	2;2	45317000	48916000	37998000	Monocarboxylate transporter 2	SLC16A7	;	2	2	2	2	2	2	2	2	2	2	2	2	2	5	5	5	41.718	379	379;478	1	24	0.0002635	3.3582	5	5	5	501170000	43881000	48437000	35351000	2	1	1	14
F5H8E5;Q93009-3;Q93009;H3BND8;F5H2X1	F5H8E5;Q93009-3;Q93009;H3BND8	16;16;16;13;5	16;16;16;13;5	16;16;16;13;5	265840000	237500000	252090000	Ubiquitin carboxyl-terminal hydrolase 7;Ubiquitin carboxyl-terminal hydrolase	USP7	;;;	5	16	16	16	14	13	8	14	13	8	14	13	8	20.2	20.2	20.2	117	1003	1003;1086;1102;909;509	1	152	0	80.933	18	15.5	8.3	3248700000	344000000	299830000	140730000	5	7	1	63
F5H8F7;Q9UBL3-2;Q9UBL3-3;Q9UBL3;H0YBF6	F5H8F7;Q9UBL3-2;Q9UBL3-3;Q9UBL3	4;4;4;4;1	4;4;4;4;1	4;4;4;4;1	38529000	37843000	0	Set1/Ash2 histone methyltransferase complex subunit ASH2	ASH2L	;;;	5	4	4	4	4	2	1	4	2	1	4	2	1	10.6	10.6	10.6	55.324	489	489;501;534;628;192	1	31	0	9.9211	10.6	5.3	1.4	399300000	47609000	27006000	27465000	2	1	0	13
F5H8H2;Q03426;F5H092;B7Z1C2;F5H163;F5H368;F5GXC0	F5H8H2;Q03426;F5H092;B7Z1C2	4;4;2;2;1;1;1	4;4;2;2;1;1;1	4;4;2;2;1;1;1	0	0	66499000	Mevalonate kinase	MVK	;;;	7	4	4	4	3	4	3	3	4	3	3	4	3	17.4	17.4	17.4	37.171	344	344;396;200;202;83;117;170	1	49	0	4.5414	15.1	17.4	15.1	763570000	59878000	54703000	60143000	0	0	1	6
F6S0T5;O60341;O60341-2;R4GMQ1;R4GMP9	F6S0T5;O60341;O60341-2	13;13;13;3;3	13;13;13;3;3	13;13;13;3;3	92070000	104800000	107900000	Lysine-specific histone demethylase 1A	KDM1A	;;	5	13	13	13	9	6	4	9	6	4	9	6	4	24.7	24.7	24.7	95.222	876	876;852;876;189;301	1	76	0	40.341	17	10.2	7.8	1248000000	141930000	105190000	59470000	3	1	2	25
F6T1Q0;Q6L8Q7-2;Q6L8Q7	F6T1Q0;Q6L8Q7-2;Q6L8Q7	8;8;8	8;8;8	8;8;8	104760000	96809000	95410000	2,5-phosphodiesterase 12	PDE12	;;	3	8	8	8	5	6	4	5	6	4	5	6	4	30.9	30.9	30.9	52.175	472	472;535;609	1	65	0	17.097	18.9	18.2	10.8	1355700000	98236000	125170000	83084000	1	2	2	28
F6U1T9;D3YTA9;P63098;H7BYZ3	F6U1T9;D3YTA9;P63098;H7BYZ3	8;8;8;6	8;8;8;6	8;8;8;6	251320000	229430000	260890000	Calcineurin subunit B type 1	PPP3R1	;;;	4	8	8	8	5	5	6	5	5	6	5	5	6	65.6	65.6	65.6	18.208	160	160;189;170;331	1	86	0	39.36	32.5	41.9	41.2	2982300000	233380000	226570000	195080000	4	6	5	60
F6UJY9;J9JIE9;E7EWH8;F6UJY1;Q5T013-3;Q5T013;H0YB18;H0YB70;Q5T015;Q5T013-2;Q5T013-4	F6UJY9;J9JIE9;E7EWH8;F6UJY1;Q5T013-3;Q5T013;H0YB18;H0YB70;Q5T015;Q5T013-2;Q5T013-4	2;2;2;2;2;2;1;1;1;1;1	2;2;2;2;2;2;1;1;1;1;1	2;2;2;2;2;2;1;1;1;1;1	25874000	28185000	0	Hydroxypyruvate isomerase;Putative hydroxypyruvate isomerase	HYI	;;;;;;;;;;	11	2	2	2	2	2	1	2	2	1	2	2	1	15	15	15	23.031	213	213;238;276;302;247;277;161;186;229;174;204	1	28	0	10.224	15	15	5.2	377100000	24035000	26764000	19620000	1	2	1	16
F8VQ10;Q13838;Q13838-2;Q5STU3;B4DP52;F6WLT2;F6UJC5;F6S4E6;F6TRA5;B4DIJ6;H0Y400;F6QYI9;F6R6M7;H0YCC6;K7EN69;K7ENP6;F6QWI5;K7EL56;K7EIL8;F6U6E2;F6S2B7;F6SXL5;E7EMX2;K7EN25	F8VQ10;Q13838;Q13838-2;Q5STU3;B4DP52;F6WLT2;F6UJC5;F6S4E6;F6TRA5	22;22;22;19;18;15;12;11;11;9;7;6;6;5;4;3;3;3;3;3;3;3;3;3	22;22;22;19;18;15;12;11;11;9;7;6;6;5;4;3;3;3;3;3;3;3;3;3	10;10;10;9;10;6;7;3;3;4;3;1;1;4;0;0;0;0;0;0;0;0;0;0	4467000000	4555300000	4723300000	Spliceosome RNA helicase DDX39B	DDX39B;hCG_2005638	;;;;;;;;	24	22	22	10	21	22	20	21	22	20	9	10	8	57.1	57.1	27.8	50.745	443	443;428;443;425;350;289;245;231;238;243;187;187;197;141;130;92;96;108;125;125;132;136;139;176	1	391	0	247.38	55.5	57.1	55.3	54106000000	4677500000	4127900000	4238100000	29	23	20	298
F8VSC5;Q6P3W7;F8VPW3;H0YIK6	F8VSC5;Q6P3W7	5;5;1;1	5;5;1;1	5;5;1;1	53500000	0	51102000	SCY1-like protein 2	SCYL2	;	4	5	5	5	3	1	5	3	1	5	3	1	5	10.6	10.6	10.6	77.053	681	681;929;76;115	1	38	0	9.6591	5.6	1.6	10.6	485400000	38908000	1672700	71005000	2	0	0	12
F8VU90;Q9NYL4-2;Q9NYL4;H0YHM7;E9PAR0	F8VU90;Q9NYL4-2;Q9NYL4	3;3;3;1;1	3;3;3;1;1	3;3;3;1;1	68080000	59978000	90458000	Peptidyl-prolyl cis-trans isomerase;Peptidyl-prolyl cis-trans isomerase FKBP11	FKBP11	;;	5	3	3	3	3	3	1	3	3	1	3	3	1	21.4	21.4	21.4	19.814	182	182;146;201;63;99	1	32	0	31.963	21.4	21.4	9.9	766070000	39770000	80305000	77005000	2	1	1	14
F8VV56;F8W022;F8VWK8;C9JV86;P08962-3;P08962-2;P08962;F8VNT9	F8VV56;F8W022;F8VWK8;C9JV86;P08962-3;P08962-2;P08962;F8VNT9	5;5;5;5;5;5;5;3	5;5;5;5;5;5;5;3	5;5;5;5;5;5;5;3	922550000	962130000	988540000	Tetraspanin;CD63 antigen	CD63	;;;;;;;	8	5	5	5	4	3	4	4	3	4	4	3	4	29	29	29	16.021	145	145;215;217;236;156;215;238;133	1	54	0	25.062	29	27.6	27.6	13503000000	1073700000	1042800000	1064600000	3	4	4	38
F8VVA7;P61923;F8VYZ4;P61923-5;P61923-4;F8VXB1;F8W156;F8W651;F8VUC5;F8VXR1;P61923-3;F8VYK5;F8VYE0;P61923-2	F8VVA7;P61923;F8VYZ4;P61923-5;P61923-4;F8VXB1;F8W156;F8W651;F8VUC5;F8VXR1;P61923-3	6;6;5;5;5;4;4;4;3;3;3;2;2;2	6;6;5;5;5;4;4;4;3;3;3;2;2;2	6;6;5;5;5;4;4;4;3;3;3;2;2;2	400820000	438850000	407560000	Coatomer subunit zeta-1	COPZ1	;;;;;;;;;;	14	6	6	6	6	4	4	6	4	4	6	4	4	52	52	52	22.34	198	198;177;163;160;185;92;107;119;95;138;154;89;164;126	1	84	0	170.88	52	29.8	29.8	4715300000	602240000	344870000	332580000	7	7	7	78
F8VW96;Q16527;F8VQR7	F8VW96;Q16527;F8VQR7	5;5;4	5;5;4	5;5;4	142840000	123930000	125100000	Cysteine and glycine-rich protein 2	CSRP2	;;	3	5	5	5	4	5	4	4	5	4	4	5	4	25.9	25.9	25.9	26.736	243	243;193;187	1	57	0	15.228	19.8	25.9	19.8	1623100000	137050000	140820000	144390000	2	2	1	21
F8VWH2;P19075	F8VWH2;P19075	2;2	2;2	2;2	0	0	55014000	Tetraspanin-8	TSPAN8	;	2	2	2	2	2	2	2	2	2	2	2	2	2	15.6	15.6	15.6	17.158	154	154;237	1	19	0	6.1888	15.6	15.6	15.6	575990000	53092000	53767000	51427000	1	0	0	5
F8VX04;Q9H2H9;F8VX12	F8VX04;Q9H2H9	4;4;1	4;4;1	4;4;1	0	137690000	116170000	Sodium-coupled neutral amino acid transporter 1	SLC38A1	;	3	4	4	4	1	3	2	1	3	2	1	3	2	7.2	7.2	7.2	56.195	503	503;487;78	1	29	0	9.4182	1.6	5.4	3.8	1170500000	25162000	128640000	81089000	1	3	1	20
F8VXC8;Q8TAQ2-2;Q8TAQ2-3;Q8TAQ2;F8VZW6	F8VXC8;Q8TAQ2-2;Q8TAQ2-3;Q8TAQ2	11;11;11;11;1	11;11;11;11;1	4;4;4;4;1	128250000	141990000	121790000	SWI/SNF complex subunit SMARCC2	SMARCC2	;;;	5	11	11	4	9	7	8	9	7	8	3	3	3	9.9	9.9	4.4	136.18	1245	1245;1130;1152;1214;105	1	88	0	18.705	7.3	5.9	6.6	1650900000	157990000	121900000	111870000	2	2	3	24
F8VXI9;Q14161-4;Q14161-3;Q14161;R4GNG3;F8W7V0;F8WAK2;Q14161-9;Q14161-10;Q14161-8;Q14161-5;Q14161-11;Q14161-7;Q14161-6	F8VXI9;Q14161-4;Q14161-3;Q14161;R4GNG3;F8W7V0;F8WAK2;Q14161-9;Q14161-10;Q14161-8;Q14161-5;Q14161-11;Q14161-7;Q14161-6	6;6;6;6;5;5;5;5;5;5;5;4;4;4	6;6;6;6;5;5;5;5;5;5;5;4;4;4	5;5;5;5;4;4;4;4;4;4;4;3;3;3	28893000	33348000	0	ARF GTPase-activating protein GIT2	GIT2	;;;;;;;;;;;;;	14	6	6	5	4	5	2	4	5	2	3	4	2	8.8	8.8	7.6	78.866	708	708;709;744;759;641;649;681;648;681;694;729;631;646;661	1	37	0	6.6974	5.1	6.8	2.5	394620000	36041000	38358000	19403000	0	1	1	12
F8VXY3;P00973-2;P00973-4;P00973;P00973-3;H0YI20;H0YIB8;F8VUC8;F8VPW7	F8VXY3;P00973-2;P00973-4;P00973;P00973-3;H0YI20	6;6;6;6;6;4;2;2;1	6;6;6;6;6;4;2;2;1	6;6;6;6;6;4;2;2;1	156280000	122650000	113550000	2-5-oligoadenylate synthase 1	OAS1	;;;;;	9	6	6	6	5	5	4	5	5	4	5	5	4	22.8	22.8	22.8	41.474	360	360;364;382;400;414;302;130;177;83	1	69	0	27.146	18.3	18.6	16.1	1641200000	138570000	119160000	107040000	3	1	3	36
F8VY35;F5H4R6;H0YIV4;P55209-2;P55209;F8W0J6;H0YH88;F8W020;F8VUX1;H0YHC3;F8VXI6;F8VVB5;F8VUC3;B7Z4K9	F8VY35;F5H4R6;H0YIV4;P55209-2;P55209;F8W0J6;H0YH88;F8W020;F8VUX1;H0YHC3;F8VXI6	10;10;10;10;10;8;7;7;7;6;6;4;1;1	9;9;9;9;9;7;6;6;6;5;5;3;1;1	1;1;1;1;1;1;0;1;1;0;1;1;0;0	1590000000	1727400000	1734000000	Nucleosome assembly protein 1-like 1	NAP1L1	;;;;;;;;;;	14	10	9	1	10	10	8	9	9	7	1	1	1	55.3	51.5	7.2	31.02	264	264;383;385;368;391;379;177;207;237;198;215;161;200;208	1	165	0	265.84	55.3	55.3	51.1	20640000000	2506400000	1430100000	1643200000	14	9	10	112
F8VYH9;F8VTV8;F8VWX7;P11802;F8VXD2;F8VZZ0;F8VZ51;F8W1L8;B4DNF9;F8VYY1;Q96BE9	F8VYH9;F8VTV8;F8VWX7;P11802;F8VXD2;F8VZZ0;F8VZ51;F8W1L8;B4DNF9	6;6;6;6;4;4;4;3;3;2;2	5;5;5;5;3;3;3;3;2;2;2	5;5;5;5;3;3;3;3;2;2;2	117780000	100390000	134810000	Cyclin-dependent kinase 4	CDK4	;;;;;;;;	11	6	5	5	5	6	6	4	5	5	4	5	5	46.5	41.8	41.8	18.685	170	170;201;203;303;132;186;208;115;183;74;111	1	55	0	14.528	36.5	46.5	46.5	1416800000	126110000	79074000	165030000	1	1	3	20
F8W111;P14384;F8VVI6;H0YHN7	F8W111;P14384;F8VVI6	4;4;2;1	4;4;2;1	4;4;2;1	45284000	43778000	44534000	Carboxypeptidase M	CPM	;;	4	4	4	4	4	4	2	4	4	2	4	4	2	21.7	21.7	21.7	28.314	249	249;443;136;198	1	37	0	12.636	21.7	21.7	11.2	492050000	56699000	38697000	24716000	3	3	0	23
F8W1A4;P54819-2;P54819;P54819-3;F8VZG5;F8VY04;P54819-5;P54819-6;P54819-4;G3V213;F8VPP1	F8W1A4;P54819-2;P54819;P54819-3;F8VZG5;F8VY04;P54819-5;P54819-6;P54819-4;G3V213	11;11;11;10;9;9;9;8;7;6;2	11;11;11;10;9;9;9;8;7;6;2	11;11;11;10;9;9;9;8;7;6;2	1024800000	946240000	958870000	Adenylate kinase 2, mitochondrial;Adenylate kinase 2, mitochondrial;Adenylate kinase 2, mitochondrial, N-terminally processed	AK2	;;;;;;;;;	11	11	11	11	10	10	10	10	10	10	10	10	10	60.8	60.8	60.8	25.63	232	232;232;239;202;162;190;224;192;131;133;42	1	214	0	103.27	55.2	56.5	56.5	11672000000	938570000	866250000	1059900000	11	13	11	121
F8W1Z6;Q7Z3U7-2;F8VWA6;Q7Z3U7-5;Q7Z3U7-4;Q7Z3U7;Q7Z3U7-3;F8VZV1	F8W1Z6;Q7Z3U7-2;F8VWA6;Q7Z3U7-5;Q7Z3U7-4;Q7Z3U7;Q7Z3U7-3	7;7;7;7;7;7;4;2	7;7;7;7;7;7;4;2	7;7;7;7;7;7;4;2	67266000	81860000	76145000	Protein MON2 homolog	MON2	;;;;;;	8	7	7	7	5	5	7	5	5	7	5	5	7	4.7	4.7	4.7	185.85	1675	1675;1676;1688;1711;1717;1718;586;1072	1	71	0	10.027	3.4	3.4	4.7	860940000	79335000	47901000	92626000	3	2	3	32
F8W6G5;C9JZ40;Q7Z2E3-3;Q7Z2E3-5;Q7Z2E3-9;Q7Z2E3-10;Q7Z2E3-11;Q7Z2E3-8;Q7Z2E3-7;Q7Z2E3;Q7Z2E3-6;Q7Z2E3-2;Q7Z2E3-4;F8WBD6;E7EUY4;F8WBM3;Q6JV79;E7EVB7;C9J8U3;Q7Z2E3-12;Q7Z2E3-13	F8W6G5;C9JZ40;Q7Z2E3-3;Q7Z2E3-5;Q7Z2E3-9;Q7Z2E3-10;Q7Z2E3-11;Q7Z2E3-8;Q7Z2E3-7;Q7Z2E3;Q7Z2E3-6;Q7Z2E3-2;Q7Z2E3-4	4;4;4;4;4;4;4;4;4;4;3;3;3;1;1;1;1;1;1;1;1	4;4;4;4;4;4;4;4;4;4;3;3;3;1;1;1;1;1;1;1;1	4;4;4;4;4;4;4;4;4;4;3;3;3;1;1;1;1;1;1;1;1	0	14365000	0	Aprataxin	APTX	;;;;;;;;;;;;	21	4	4	4	2	3	1	2	3	1	2	3	1	22.2	22.2	22.2	22.763	198	198;216;284;288;292;302;306;337;342;356;113;168;254;52;63;74;85;99;155;49;192	1	21	0	6.6699	9.1	14.6	4	171540000	29206000	10854000	3986800	1	0	0	5
F8W6I7;P09651-3;P09651-2;P09651;F8VZ49;Q32P51;F8VTQ5;H0YH80;F8W646;F8VYN5	F8W6I7;P09651-3;P09651-2;P09651;F8VZ49;Q32P51;F8VTQ5;H0YH80	17;17;17;17;12;12;10;9;6;5	16;16;16;16;11;11;9;9;6;4	15;15;15;15;11;10;9;8;6;4	5938300000	4868500000	5384300000	Heterogeneous nuclear ribonucleoprotein A1;Heterogeneous nuclear ribonucleoprotein A1, N-terminally processed;Heterogeneous nuclear ribonucleoprotein A1-like 2	HNRNPA1;HNRNPA1L2	;;;;;;;	10	17	16	15	16	15	16	15	14	15	14	13	14	59.9	57	54.7	33.155	307	307;267;320;372;231;320;145;191;156;113	1	323	0	323.31	59.3	59	59.6	61643000000	5722900000	4921800000	5292300000	23	20	17	234
F8W726;Q14157-4;Q14157-1;Q14157-3;Q14157;Q14157-5;Q5VU77;Q5VU79;Q5VU78;Q5VU81;Q5VU80;H0Y5H6;H7C2T8	F8W726;Q14157-4;Q14157-1;Q14157-3;Q14157;Q14157-5	25;25;25;25;25;25;12;9;9;8;8;2;2	25;25;25;25;25;25;12;9;9;8;8;2;2	25;25;25;25;25;25;12;9;9;8;8;2;2	876390000	890880000	879230000	Ubiquitin-associated protein 2-like	UBAP2L	;;;;;	13	25	25	25	20	20	19	20	20	19	20	20	19	39.2	39.2	39.2	113.5	1078	1078;976;983;1068;1087;1104;350;265;280;182;234;383;399	1	321	0	141.21	31.8	30	28.6	11218000000	927530000	784750000	673500000	14	14	14	169
F8W727;P62910;D3YTB1;D3YTI8	F8W727;P62910;D3YTB1	10;10;9;2	10;10;9;2	10;10;9;2	2511900000	2789200000	2798700000	60S ribosomal protein L32	RPL32	;;	4	10	10	10	8	9	8	8	9	8	8	9	8	54.2	54.2	54.2	17.962	153	153;135;133;62	1	150	0	110.99	47.7	52.9	49.7	32364000000	2296500000	2690600000	2540900000	7	6	7	86
F8W7C6;H7C123;H7C2C5;Q96L21;H7C2U2	F8W7C6;H7C123;H7C2C5	11;6;6;5;1	1;0;0;0;0	1;0;0;0;0	224320000	324800000	241600000		RPL10	;;	5	11	1	1	10	9	9	1	1	1	1	1	1	54.6	11	11	18.592	163	163;91;131;214;28	1	24	0	51.549	54.6	54.6	54.6	2732500000	228020000	302060000	224370000	2	2	1	25
F8W7D6;F5H039;Q9NQX3;Q9NQX3-2;H0YJR5;H0YJ30;G3V582	F8W7D6;F5H039;Q9NQX3;Q9NQX3-2	3;3;3;3;1;1;1	3;3;3;3;1;1;1	3;3;3;3;1;1;1	0	34073000	35696000	Gephyrin;Molybdopterin adenylyltransferase;Molybdopterin molybdenumtransferase	GPHN	;;;	7	3	3	3	2	2	2	2	2	2	2	2	2	6.1	6.1	6.1	76.331	705	705;782;736;769;201;280;380	1	27	0	5.9719	4.1	3.3	4.1	360150000	12225000	31544000	27605000	1	1	1	11
F8W7G7;P02751-5;P02751-17;P02751-3;P02751;P02751-7;P02751-15;P02751-4;P02751-6;P02751-11;P02751-10;P02751-9;P02751-14;P02751-13;P02751-8;P02751-12;H0Y7Z1;P02751-2;P02751-16;H0Y4K8	F8W7G7;P02751-5;P02751-17;P02751-3;P02751;P02751-7;P02751-15;P02751-4;P02751-6;P02751-11;P02751-10;P02751-9;P02751-14;P02751-13;P02751-8;P02751-12	19;19;19;19;19;19;19;18;18;18;17;17;17;17;17;14;8;2;2;1	19;19;19;19;19;19;19;18;18;18;17;17;17;17;17;14;8;2;2;1	19;19;19;19;19;19;19;18;18;18;17;17;17;17;17;14;8;2;2;1	186910000	181620000	217420000	Fibronectin;Anastellin;Ugl-Y1;Ugl-Y2;Ugl-Y3	FN1	;;;;;;;;;;;;;;;	20	19	19	19	16	11	12	16	11	12	16	11	12	13.7	13.7	13.7	243.23	2211	2211;2211;2330;2355;2386;2446;2477;2031;2184;2386;2176;2240;2265;2267;2296;2008;1103;642;657;241	1	160	0	61.88	11.5	8.1	8.8	2323200000	234070000	167660000	200250000	7	7	9	76
F8W7Q4;Q96A26;E9PH05	F8W7Q4;Q96A26;E9PH05	4;4;3	4;4;3	4;4;3	149620000	143740000	149250000	Protein FAM162A	FAM162A	;;	3	4	4	4	3	4	2	3	4	2	3	4	2	25	25	25	16.515	144	144;154;141	1	43	0	24.764	24.3	25	19.4	1902100000	159210000	152930000	102540000	3	4	2	35
F8W8I6;P31483;Q96B58;E5RGV5	F8W8I6;P31483;Q96B58;E5RGV5	5;5;4;3	2;2;2;1	1;1;1;1	0	26937000	0	Nucleolysin TIA-1 isoform p40	TIA1	;;;	4	5	2	1	4	4	3	1	2	1	1	1	0	16.9	8.3	5.7	42.835	385	385;386;214;144	1	13	0.0040476	2.1236	14.3	14.5	8.3	171340000	19691000	25181000	7230000	0	0	0	2
F8W8J4;Q9NZM1-6;Q9NZM1;Q9NZM1-2;Q9NZM1-5	F8W8J4;Q9NZM1-6;Q9NZM1;Q9NZM1-2;Q9NZM1-5	94;94;94;87;68	94;94;94;87;68	3;3;3;3;3	5205800000	5162000000	5129100000	Myoferlin	MYOF	;;;;	5	94	94	3	80	86	74	80	86	74	2	3	3	56.8	56.8	1.8	234.65	2061	2061;2048;2061;2019;1577	1	1259	0	323.31	49.4	51.3	43.2	62137000000	5135100000	5533700000	4752900000	63	62	58	763
F8W8R3;P49005;C9JLE1;C9JHC7;C9IZD2;C9J8Z7	F8W8R3;P49005;C9JLE1;C9JHC7	5;5;3;3;1;1	5;5;3;3;1;1	5;5;3;3;1;1	39691000	0	49889000	DNA polymerase delta subunit 2	POLD2	;;;	6	5	5	5	4	2	3	4	2	3	4	2	3	18.2	18.2	18.2	49.612	455	455;469;220;257;148;155	1	45	0	11.745	15.2	6.8	9.9	460200000	30881000	25521000	44784000	3	0	1	16
F8W8S0;Q13409-3;Q13409-7;Q13409-2;Q13409;Q13409-6;Q13409-5;E7EQL5;E7EV09;E7ET01;E7ETL8;E7EQU2;E7ESD3;E7EMU4;E9PGG1;E7EUM4;E7ERR6;E7ERH4;E7EU01	F8W8S0;Q13409-3;Q13409-7;Q13409-2;Q13409;Q13409-6;Q13409-5;E7EQL5	17;17;17;17;17;16;16;11;8;5;5;5;5;5;3;3;3;3;2	17;17;17;17;17;16;16;11;8;5;5;5;5;5;3;3;3;3;2	17;17;17;17;17;16;16;11;8;5;5;5;5;5;3;3;3;3;2	598390000	632230000	647660000	Cytoplasmic dynein 1 intermediate chain 2	DYNC1I2	;;;;;;;	19	17	17	17	15	13	10	15	13	10	15	13	10	41.7	41.7	41.7	71.349	638	638;612;630;632;638;611;637;305;250;173;184;185;187;214;110;137;139;151;121	1	230	0	115.07	40	27	22.1	7178100000	539910000	600850000	445860000	12	10	9	133
F8W8S3;H0YKT5;H0YKN8;H0YL70;Q04726-2;Q04726-7;Q04726-3;Q04726-6;Q04726-5;Q04726-4;Q04726;F5H7D6;H0YNT2;H0YNI7;H0YLI3;B3KQ29;H0YKH0;H0YLW9;G8JLG4;F8W9R0;Q04727-2;Q04727-4;Q04727;Q04727-3;B4DE62;K7EMK7;Q04725-2;Q04725;K7EJR7;Q04725-3	F8W8S3;H0YKT5;H0YKN8;H0YL70;Q04726-2;Q04726-7;Q04726-3;Q04726-6;Q04726-5;Q04726-4;Q04726;F5H7D6;H0YNT2;H0YNI7;H0YLI3	7;7;7;7;7;7;7;7;7;7;7;6;6;5;4;3;3;3;3;3;3;3;3;3;2;2;2;2;1;1	7;7;7;7;7;7;7;7;7;7;7;6;6;5;4;3;3;3;3;3;3;3;3;3;2;2;2;2;1;1	4;4;4;4;4;4;4;4;4;4;4;3;3;2;4;0;3;3;0;0;0;0;0;0;0;0;0;0;0;0	79242000	87885000	100290000	Transducin-like enhancer protein 3	TLE3	;;;;;;;;;;;;;;	30	7	7	4	6	5	5	6	5	5	3	4	3	14.5	14.5	9	82.611	764	764;774;778;782;760;762;764;767;769;772;772;699;716;353;611;410;445;448;704;805;704;748;773;805;410;744;621;743;280;706	1	57	0	9.8305	12.6	10.5	9.6	1034000000	75370000	89390000	90193000	2	2	1	23
F8W8Z9;Q8N4H5;Q8N4H5-3;Q8N4H5-2;H3BUX3;H0YFG9	F8W8Z9;Q8N4H5;Q8N4H5-3;Q8N4H5-2	5;5;5;5;2;2	5;5;5;5;2;2	5;5;5;5;2;2	290250000	235070000	283270000	Mitochondrial import receptor subunit TOM5 homolog	TOMM5	;;;	6	5	5	5	4	5	3	4	5	3	4	5	3	35.7	35.7	35.7	10.976	98	98;51;85;92;64;71	1	52	0	6.8785	27.6	35.7	25.5	3188700000	273900000	243390000	201940000	2	3	2	34
F8W998;H9KV37;O14936-3;O14936-4;O14936-6;O14936-2;O14936;Q5JS79;Q5JS72;Q5JS74;O14936-5	F8W998;H9KV37;O14936-3;O14936-4;O14936-6;O14936-2;O14936;Q5JS79;Q5JS72;Q5JS74;O14936-5	4;4;4;4;4;4;4;2;2;2;2	4;4;4;4;4;4;4;2;2;2;2	4;4;4;4;4;4;4;2;2;2;2	41045000	31643000	39218000	Peripheral plasma membrane protein CASK	CASK	;;;;;;;;;;	11	4	4	4	4	2	3	4	2	3	4	2	3	6.6	6.6	6.6	103.28	909	909;921;897;898;909;921;926;381;518;590;518	1	33	0	15.667	6.6	3.3	4.4	512240000	60951000	23104000	40521000	2	0	2	17
F8W9U3;Q96IU4;B4DQI4;Q96IU4-2	F8W9U3;Q96IU4;B4DQI4	7;7;6;2	7;7;6;2	7;7;6;2	244580000	209410000	204360000	Alpha/beta hydrolase domain-containing protein 14B	ABHD14B	;;	4	7	7	7	5	7	6	5	7	6	5	7	6	38.5	38.5	38.5	22.38	208	208;210;188;172	1	79	0	13.279	30.3	38.5	33.7	2795600000	254620000	260080000	193580000	3	3	5	38
F8W9X7;Q567U6;H7C050	F8W9X7;Q567U6	8;8;1	8;8;1	8;8;1	66199000	65994000	58338000	Coiled-coil domain-containing protein 93	CCDC93	;	3	8	8	8	5	7	5	5	7	5	5	7	5	15.2	15.2	15.2	73.041	630	630;631;91	1	53	0	13.822	9.4	13.2	8.6	686540000	69763000	91319000	61505000	2	4	1	22
F8WA11;Q7Z460-2;Q7Z460-4;F5GWS0;Q7Z460-3;Q7Z460;F5H2E2;F5GWM7;H0Y5T1;C9J151	F8WA11;Q7Z460-2;Q7Z460-4;F5GWS0;Q7Z460-3;Q7Z460;F5H2E2;F5GWM7	11;11;11;11;11;11;8;8;3;1	7;7;7;7;7;7;4;4;1;1	7;7;7;7;7;7;4;4;1;1	58277000	53641000	46243000	CLIP-associating protein 1	CLASP1	;;;;;;;	10	11	7	7	8	4	7	4	2	4	4	2	4	9.4	6.8	6.8	164.49	1494	1494;1471;1477;1478;1494;1538;1245;1255;704;150	1	50	0	17.399	6.8	3.3	6.7	565770000	38031000	37056000	35462000	2	1	2	22
F8WAK8;Q8N3U4;Q8N3U4-2;B1AMT4;B1AMT1;B1AMT2;B1AMT3;B1AMT0;C9JJQ0;Q9UJ98-2;Q9UJ98-3;Q9UJ98	F8WAK8;Q8N3U4;Q8N3U4-2;B1AMT4;B1AMT1;B1AMT2;B1AMT3	4;4;4;3;2;2;2;1;1;1;1;1	4;4;4;3;2;2;2;1;1;1;1;1	3;3;3;2;1;1;1;0;0;1;1;1	23413000	0	0	Cohesin subunit SA-2	STAG2	;;;;;;	12	4	4	3	4	3	0	4	3	0	3	2	0	4	4	2.7	134.07	1162	1162;1231;1268;548;154;169;207;115;232;888;1167;1225	1	23	0	6.261	4	2.7	0	221670000	27301000	13603000	0	2	2	0	8
F8WAS3;Q16718;C9IZN5;H7BYD0;Q16718-2	F8WAS3;Q16718;C9IZN5;H7BYD0;Q16718-2	4;4;3;3;3	4;4;3;3;3	4;4;3;3;3	102720000	100980000	136270000	NADH dehydrogenase [ubiquinone] 1 alpha subcomplex subunit 5	NDUFA5	;;;;	5	4	4	4	2	4	3	2	4	3	2	4	3	51.4	51.4	51.4	7.8423	70	70;116;93;112;116	1	54	0	12.176	37.1	51.4	51.4	1315000000	77396000	141910000	121540000	2	2	4	28
F8WAX7;A8K0M9;Q9Y6D0	F8WAX7;A8K0M9;Q9Y6D0	2;2;2	2;2;2	2;2;2	0	21876000	0	Selenoprotein K	SELK	;;	3	2	2	2	1	2	0	1	2	0	1	2	0	29.2	29.2	29.2	8.2912	72	72;91;94	1	13	0.0022217	2.5483	12.5	29.2	0	131070000	7875100	20146000	0	0	1	0	4
F8WCF6;P59998;P59998-3;F8WDD7;P59998-2;H7C0A3;R4GN08;P59998-4;F8WE39;F8WDW3	F8WCF6;P59998;P59998-3;F8WDD7;P59998-2;H7C0A3	11;11;10;7;7;6;5;5;3;2	11;11;10;7;7;6;5;5;3;2	11;11;10;7;7;6;5;5;3;2	1412900000	1424100000	1645600000	Actin-related protein 2/3 complex subunit 4	ARPC4-TTLL3;ARPC4	;;;;;	10	11	11	11	10	9	10	10	9	10	10	9	10	70.7	70.7	70.7	21.058	181	181;168;187;113;625;167;77;78;47;44	1	163	0	118.3	60.2	53	59.7	17915000000	1453800000	1305500000	1561000000	10	7	8	98
F8WF27;F8WBG6;P30408	F8WF27;F8WBG6;P30408	1;1;1	1;1;1	1;1;1	0	133460000	119590000	Transmembrane 4 L6 family member 1	TM4SF1	;;	3	1	1	1	1	1	1	1	1	1	1	1	1	8.9	8.9	8.9	10.989	101	101;103;202	1	20	0.0031416	2.2895	8.9	8.9	8.9	1169400000	49839000	129160000	104020000	0	1	1	5
F8WJN3;Q16630-3;Q16630;Q16630-2;F8W084	F8WJN3;Q16630-3;Q16630;Q16630-2	14;14;14;14;2	14;14;14;14;2	14;14;14;14;2	407920000	463890000	469140000	Cleavage and polyadenylation specificity factor subunit 6	CPSF6	;;;	5	14	14	14	11	8	9	11	8	9	11	8	9	35.4	35.4	35.4	52.269	478	478;478;551;588;107	1	129	0	188.9	25.3	18.4	18.6	5724000000	479420000	253560000	445430000	5	5	5	63
G3V0G5;Q8IV38;F8WB95	G3V0G5;Q8IV38	3;3;1	3;3;1	3;3;1	47027000	0	0	Ankyrin repeat and MYND domain-containing protein 2	ANKMY2	;	3	3	3	3	3	1	1	3	1	1	3	1	1	11.7	11.7	11.7	38.072	341	341;441;69	1	25	0	6.1132	11.7	2.3	5.6	319500000	39114000	13417000	13504000	1	0	0	7
G3V0I5;P49821-2;P49821;E9PQP1;B4DE93;E9PMX3;E9PJL9;E9PLC6;E9PPR0;E9PPS5;E9PPD6;H0YD04;H0YE81	G3V0I5;P49821-2;P49821;E9PQP1;B4DE93;E9PMX3	7;7;7;5;5;4;3;3;3;2;1;1;1	7;7;7;5;5;4;3;3;3;2;1;1;1	7;7;7;5;5;4;3;3;3;2;1;1;1	59089000	64051000	71226000	NADH dehydrogenase [ubiquinone] flavoprotein 1, mitochondrial	NDUFV1	;;;;;	13	7	7	7	2	5	7	2	5	7	2	5	7	20.4	20.4	20.4	50.054	457	457;455;464;178;363;178;95;136;144;75;52;127;133	1	55	0	14.941	5.5	12.7	20.4	778820000	27205000	57919000	96309000	0	1	1	18
G3V126;Q9UI12-2;Q9UI12;E5RG49;E5RHH0	G3V126;Q9UI12-2;Q9UI12	8;8;8;2;2	8;8;8;2;2	8;8;8;2;2	102430000	107480000	105790000	V-type proton ATPase subunit H	ATP6V1H	;;	5	8	8	8	7	6	5	7	6	5	7	6	5	28.2	28.2	28.2	51.57	443	443;465;483;101;102	1	66	0	40.63	25.7	20.3	16.9	1449200000	151890000	132530000	92442000	4	2	2	37
G3V1D3;G3V180;Q9NY33-4;Q9NY33;E9PQ14;Q9NY33-2;E9PKK8;E9PPK9;E9PNX5;E9PQF2	G3V1D3;G3V180;Q9NY33-4;Q9NY33	23;23;23;23;9;7;6;6;4;2	23;23;23;23;9;7;6;6;4;2	23;23;23;23;9;7;6;6;4;2	801710000	813910000	811340000	Dipeptidyl peptidase 3	DPP3	;;;	10	23	23	23	18	18	18	18	18	18	18	18	18	42.3	42.3	42.3	84.304	756	756;757;707;737;177;317;170;201;104;90	1	265	0	112.47	32.5	33.3	33.2	9560600000	862490000	732800000	737620000	17	12	12	154
G3V1E1;E9PQT3;E7EWE2;G3XAB5;P17405-3;P17405-2;P17405-4;P17405;E9PL59;E9PPK6;H0YEP5	G3V1E1;E9PQT3;E7EWE2;G3XAB5;P17405-3;P17405-2;P17405-4;P17405;E9PL59;E9PPK6;H0YEP5	2;2;2;2;2;2;2;2;1;1;1	2;2;2;2;2;2;2;2;1;1;1	2;2;2;2;2;2;2;2;1;1;1	0	16986000	15774000	Sphingomyelin phosphodiesterase	SMPD1	;;;;;;;;;;	11	2	2	2	1	2	2	1	2	2	1	2	2	5.7	5.7	5.7	39.842	366	366;402;575;587;573;585;628;629;52;171;317	1	15	0.00026295	3.3328	3	5.7	5.7	117180000	4838700	16788000	14751000	1	1	2	6
G3V1K3;J3QT77;Q15165-3;Q15165-1;Q15165;G3XAK4	G3V1K3;J3QT77;Q15165-3;Q15165-1;Q15165;G3XAK4	12;11;11;11;11;7	12;11;11;11;11;7	12;11;11;11;11;7	838760000	732640000	777950000	Serum paraoxonase/arylesterase 2	PON2	;;;;;	6	12	12	12	11	10	10	11	10	10	11	10	10	48.3	48.3	48.3	41.527	375	375;342;342;354;354;219	1	194	0	124.46	48.3	42.4	36.8	9335700000	850770000	738180000	808720000	13	14	11	140
G3V1S1;P19447	G3V1S1;P19447	2;2	2;2	2;2	0	387290000	403250000	TFIIH basal transcription factor complex helicase XPB subunit	ERCC3	;	2	2	2	2	2	2	2	2	2	2	2	2	2	4	4	4	81.983	718	718;782	1	24	0.00025786	3.0581	4	4	4	4692300000	395140000	345540000	343860000	0	1	1	3
G3V2F7;Q13404-1;Q13404;Q13404-7;Q13404-2;Q13404-8;Q13404-6	G3V2F7;Q13404-1;Q13404;Q13404-7;Q13404-2;Q13404-8;Q13404-6	10;9;8;8;8;6;5	10;9;8;8;8;6;5	3;3;3;3;3;1;3	944190000	878450000	1033900000	Ubiquitin-conjugating enzyme E2 variant 1	UBE2V1	;;;;;;	7	10	10	3	7	8	7	7	8	7	2	3	2	31.9	31.9	10	42.208	370	370;221;147;170;170;105;103	1	131	0	27.538	22.4	25.1	20.8	12163000000	890280000	950810000	963650000	3	4	4	61
G3V3U6;Q86TS9-2;Q86TS9-3;Q86TS9	G3V3U6;Q86TS9-2;Q86TS9-3;Q86TS9	1;1;1;1	1;1;1;1	1;1;1;1	6954100	0	0	39S ribosomal protein L52, mitochondrial	MRPL52	;;;	4	1	1	1	1	0	1	1	0	1	1	0	1	35.3	35.3	35.3	5.9288	51	51;64;122;123	1	4	0	5.4424	35.3	0	35.3	34236000	6964400	0	0	1	0	1	3
G3V4F2;Q86TX2;P49753;B3KSA0;P49753-2	G3V4F2;Q86TX2;P49753;B3KSA0;P49753-2	8;8;7;4;4	8;8;7;4;4	8;8;7;4;4	301110000	326510000	268550000	Acyl-coenzyme A thioesterase 1;Acyl-coenzyme A thioesterase 2, mitochondrial	ACOT1;ACOT2	;;;;	5	8	8	8	3	5	3	3	5	3	3	5	3	28.9	28.9	28.9	43.733	395	395;421;483;286;301	1	53	0	23.447	7.3	16.7	9.1	3660900000	272230000	340780000	219050000	0	2	2	16
G3V4U3;Q7Z5R2;G3V3Q7;G3V4L7;E7EQA7;C9JX49;P40305;G3V5W8	G3V4U3;Q7Z5R2;G3V3Q7;G3V4L7;E7EQA7;C9JX49;P40305;G3V5W8	2;2;2;2;2;2;2;1	2;2;2;2;2;2;2;1	2;2;2;2;2;2;2;1	0	21230000	0	Interferon alpha-inducible protein 27, mitochondrial	IFI27;ISG12	;;;;;;;	8	2	2	2	1	2	1	1	2	1	1	2	1	72.5	72.5	72.5	3.8395	40	40;57;62;93;122;122;119;109	1	14	0	17.8	32.5	72.5	32.5	181030000	9288300	19846000	11189000	0	0	0	2
G3V4W0;B4DY08;G3V4C1;P07910-2;P07910-4;G3V2D6;P07910-3;G3V5X6;G3V3K6;G3V251;G3V5V7;B4DSU6;G3V4M8;O60812;G3V2H6;E5RG71;B3KT61;Q86SE5;Q86SE5-3	G3V4W0;B4DY08;G3V4C1;P07910-2;P07910-4;G3V2D6;P07910-3;G3V5X6;G3V3K6;G3V251;G3V5V7	12;12;12;12;11;7;7;6;6;6;6;5;4;4;3;1;1;1;1	12;12;12;12;11;7;7;6;6;6;6;5;4;4;3;1;1;1;1	1;1;1;1;1;1;0;1;1;1;0;0;0;0;0;0;0;0;0	810430000	1017100000	907910000	Heterogeneous nuclear ribonucleoproteins C1/C2	HNRNPC	;;;;;;;;;;	19	12	12	1	11	12	11	11	12	11	1	1	1	48.5	48.5	6.9	28.916	262	262;288;292;293;250;214;226;117;121;126;180;147;66;293;54;85;280;291;304	1	192	0	55.563	48.5	48.5	45.8	10251000000	791750000	946660000	894310000	9	8	14	111
G3V529;Q9GZR7-2;Q9GZR7;F5GYL3	G3V529;Q9GZR7-2;Q9GZR7;F5GYL3	7;7;7;5	7;7;7;5	7;7;7;5	79738000	96540000	67578000	ATP-dependent RNA helicase DDX24	DDX24	;;;	4	7	7	7	6	6	2	6	6	2	6	6	2	10.7	10.7	10.7	91.48	816	816;804;859;609	1	64	0	10.955	8.8	9.3	2.8	908250000	81294000	90212000	29463000	2	1	1	17
G3V572;G3V3R9;G3V3Y4;G3V256;Q6PJT7-4;Q6PJT7-3;Q6PJT7-5;Q6PJT7-9;Q6PJT7-2;Q6PJT7;Q6PJT7-11;G3V473;G3V240;Q6PJT7-10;H0YJA2;G3V2X4	G3V572;G3V3R9;G3V3Y4;G3V256;Q6PJT7-4;Q6PJT7-3;Q6PJT7-5;Q6PJT7-9;Q6PJT7-2;Q6PJT7;Q6PJT7-11;G3V473;G3V240;Q6PJT7-10	5;5;5;5;5;5;5;5;5;5;4;3;3;3;2;1	5;5;5;5;5;5;5;5;5;5;4;3;3;3;2;1	5;5;5;5;5;5;5;5;5;5;4;3;3;3;2;1	0	0	29806000	Zinc finger CCCH domain-containing protein 14	ZC3H14	;;;;;;;;;;;;;	16	5	5	5	3	2	3	3	2	3	3	2	3	47.7	47.7	47.7	14.68	132	132;209;215;605;571;579;711;730;735;736;585;72;94;543;651;64	1	32	0	6.412	32.6	21.2	26.5	286180000	22175000	13130000	68341000	1	0	1	9
G3V599;O15320-9;O15320-8;O15320-6;O15320-7;O15320-2;O15320-4;O15320-3;O15320-10;O15320;O15320-5	G3V599;O15320-9;O15320-8;O15320-6;O15320-7;O15320-2;O15320-4;O15320-3;O15320-10;O15320;O15320-5	3;3;3;3;3;3;3;3;3;3;3	3;3;3;3;3;3;3;3;3;3;3	3;3;3;3;3;3;3;3;3;3;3	0	0	39421000	cTAGE family member 5	CTAGE5	;;;;;;;;;;	11	3	3	3	2	3	3	2	3	3	2	3	3	4.2	4.2	4.2	151.72	1339	1339;672;724;729;732;761;771;775;792;804;809	1	28	0	4.3604	2.5	4.2	4.2	483330000	43286000	46860000	44025000	0	1	1	8
G3V5T9;P24941-2;P24941;E7ESI2;Q00526;K7EJ83	G3V5T9;P24941-2;P24941;E7ESI2	12;12;12;10;3;2	10;10;10;8;1;1	10;10;10;8;1;1	254790000	249920000	267550000	Cyclin-dependent kinase 2	CDK2	;;;	6	12	10	10	11	11	11	9	9	9	9	9	9	45.7	40.2	40.2	39.178	346	346;264;298;238;305;213	1	112	0	62.867	38.4	41.6	38.4	3135700000	227810000	286010000	274110000	5	2	3	51
G3V5V3;O60524-4;O60524-5;O60524-3;O60524;G3V547;G3V4D9;O60524-2	G3V5V3;O60524-4;O60524-5;O60524-3;O60524	7;7;7;7;7;2;2;1	7;7;7;7;7;2;2;1	7;7;7;7;7;2;2;1	50048000	47556000	52490000	Nuclear export mediator factor NEMF	NEMF	;;;;	8	7	7	7	5	6	4	5	6	4	5	6	4	8.1	8.1	8.1	113.95	998	998;1034;1051;1055;1076;121;178;276	1	56	0	6.6226	6.1	7.1	4.7	584790000	55821000	57599000	48049000	1	2	1	17
G3V5Z7;P60900;G3V295;P60900-2;G3V3I1;G3V3U4;P60900-3;H0YJC4;G3V4S5;G3V2S7	G3V5Z7;P60900;G3V295;P60900-2;G3V3I1	15;15;13;12;11;7;7;3;2;2	15;15;13;12;11;7;7;3;2;2	15;15;13;12;11;7;7;3;2;2	2708600000	2714300000	2675200000	Proteasome subunit alpha type;Proteasome subunit alpha type-6	PSMA6	;;;;	10	15	15	15	15	14	15	15	14	15	15	14	15	60.7	60.7	60.7	28.147	252	252;246;203;227;148;107;167;85;41;67	1	247	0	246.71	60.7	59.9	60.7	33293000000	2721400000	2606400000	2621800000	15	14	15	180
G3XAB3;Q96AE7	G3XAB3;Q96AE7	3;2	3;2	3;2	15524000	0	0	Tetratricopeptide repeat protein 17	TTC17	;	2	3	3	3	3	1	1	3	1	1	3	1	1	4.5	4.5	4.5	108.61	956	956;1141	1	22	0	4.1513	4.5	1.6	1.6	139360000	9836800	6329600	5415900	1	0	0	4
G3XAC1;Q9BXS9-7;Q9BXS9-2;Q9BXS9-3;Q9BXS9;Q9BXS9-5;Q9BXS9-4;F8W9I8;C9J6Y3;C9JKR6	G3XAC1;Q9BXS9-7;Q9BXS9-2;Q9BXS9-3;Q9BXS9;Q9BXS9-5;Q9BXS9-4	3;3;3;3;3;2;2;1;1;1	3;3;3;3;3;2;2;1;1;1	3;3;3;3;3;2;2;1;1;1	0	13560000	0	Solute carrier family 26 member 6	SLC26A6	;;;;;;	10	3	3	3	1	2	1	1	2	1	1	2	1	6.1	6.1	6.1	71.535	651	651;723;740;758;759;699;737;120;169;180	1	13	0	11.364	1.1	3.8	1.1	96429000	6950000	12676000	6814000	0	1	1	10
G3XAH6;P51003;P51003-2;G3V3I9;G3V457;G3V2A0;H7C3W0;H0YJL4;H0YJ00;F8WAT4;Q9NRJ5;Q9BWT3-2;Q9BWT3	G3XAH6;P51003;P51003-2	7;7;4;3;2;2;1;1;1;1;1;1;1	7;7;4;3;2;2;1;1;1;1;1;1;1	7;7;4;3;2;2;1;1;1;1;1;1;1	0	0	31659000	Poly(A) polymerase alpha	PAPOLA	;;	13	7	7	7	1	1	3	1	1	3	1	1	3	14.6	14.6	14.6	80.625	724	724;745;285;177;111;475;168;181;203;234;636;714;736	1	24	0	12.689	1.4	1.9	6.5	222130000	7351900	9930600	29219000	0	0	1	7
G3XAI2;P07942;E7EPA6	G3XAI2;P07942;E7EPA6	12;12;6	12;12;6	12;12;6	160440000	145440000	175010000	Laminin subunit beta-1	LAMB1	;;	3	12	12	12	10	9	7	10	9	7	10	9	7	9.3	9.3	9.3	200.48	1810	1810;1786;850	1	111	0	45.082	8	7.7	6.2	1912200000	166760000	147500000	120750000	5	5	4	57
G3XAN4;B4E0K2;Q15629	G3XAN4;B4E0K2;Q15629	6;6;6	6;6;6	6;6;6	177340000	176220000	190760000	Translocating chain-associated membrane protein 1	TRAM1	;;	3	6	6	6	5	5	4	5	5	4	5	5	4	25	25	25	33.435	288	288;343;374	1	65	0	33.017	18.1	22.2	15.3	2145700000	205630000	156970000	187560000	2	2	4	32
G5E994;Q5VW38-2;Q5VW38;U3KQD2;Q5VW38-3	G5E994;Q5VW38-2;Q5VW38;U3KQD2;Q5VW38-3	2;2;2;1;1	2;2;2;1;1	2;2;2;1;1	0	21538000	27971000	Protein GPR107	GPR107	;;;;	5	2	2	2	2	2	2	2	2	2	2	2	2	3.7	3.7	3.7	63.984	571	571;552;600;128;300	1	18	0	4.7493	3.7	3.7	3.7	221360000	7616100	27348000	22913000	1	1	1	9
G5E9E7;G3V1L9;Q07157-2;Q07157;H0YKB1;H0Y3R8;H0YLT6	G5E9E7;G3V1L9;Q07157-2;Q07157	14;14;14;14;4;1;1	14;14;14;14;4;1;1	14;14;14;14;4;1;1	154700000	124520000	142840000	Tight junction protein ZO-1	TJP1	;;;	7	14	14	14	12	10	10	12	10	10	12	10	10	9.9	9.9	9.9	189.67	1692	1692;1768;1668;1748;383;227;231	1	130	0	17.466	8.3	6.5	6.8	1624900000	174990000	127940000	127500000	6	2	2	45
G5E9I3;F5H7K1;E7EWW0;Q7Z3J2;C9J7I2;Q7Z3J2-2;H3BV68;H3BVG8;H3BUS7;H3BTI5;H3BNX2;F6S1J4	G5E9I3;F5H7K1;E7EWW0;Q7Z3J2;C9J7I2;Q7Z3J2-2;H3BV68	12;12;12;12;10;10;9;5;2;1;1;1	12;12;12;12;10;10;9;5;2;1;1;1	12;12;12;12;10;10;9;5;2;1;1;1	138980000	118130000	114800000	UPF0505 protein C16orf62	C16orf62	;;;;;;	12	12	12	12	9	9	9	9	9	9	9	9	9	18.7	18.7	18.7	98.889	870	870;959;1052;963;813;813;712;453;116;73;170;273	1	102	0	30.074	15.1	14.3	14.3	1474900000	177400000	163110000	129590000	1	2	2	37
G5E9S8;G3V2E7;F8W6L3;G3V3H3;G3V5R9;E7EVH7;Q07866-8;Q07866-2;Q07866-3;Q07866;Q07866-7;Q07866-5;Q07866-10;Q07866-6;Q07866-4;Q07866-9;G3V2P7;H0YJU9;H0YJL0;H0YJT3;H0YG16;H0YGB8	G5E9S8;G3V2E7;F8W6L3;G3V3H3;G3V5R9;E7EVH7;Q07866-8;Q07866-2;Q07866-3;Q07866;Q07866-7;Q07866-5;Q07866-10;Q07866-6;Q07866-4;Q07866-9	17;17;17;17;17;17;17;17;17;17;17;17;17;17;17;17;7;3;3;3;3;1	17;17;17;17;17;17;17;17;17;17;17;17;17;17;17;17;7;3;3;3;3;1	13;13;13;13;13;13;13;13;13;13;13;13;13;13;13;13;6;3;3;3;3;1	296240000	359080000	301190000	Kinesin light chain 1	KLC1	;;;;;;;;;;;;;;;	22	17	17	13	14	13	11	14	13	11	11	10	8	35	35	25.7	62.506	549	549;551;576;609;630;732;551;560;564;573;584;616;618;628;637;639;150;131;150;161;268;60	1	164	0	41.816	30.4	27	24.2	4105700000	359040000	446130000	321730000	8	5	5	73
G5E9W2;Q9P2E5;Q9P2E5-2;C9JZF7	G5E9W2;Q9P2E5;Q9P2E5-2	7;7;4;1	7;7;4;1	7;7;4;1	42442000	42323000	47602000	Chondroitin sulfate glucuronyltransferase	CHPF2	;;	4	7	7	7	5	4	3	5	4	3	5	4	3	11	11	11	85.146	764	764;772;666;90	1	49	0	7.4021	7.5	5.6	3.5	452770000	53232000	43112000	33842000	3	2	2	21
G5E9W3;Q9UKF6;C9JZH6	G5E9W3;Q9UKF6	4;4;1	4;4;1	4;4;1	0	34306000	0	Cleavage and polyadenylation specificity factor subunit 3	CPSF3	;	3	4	4	4	4	3	2	4	3	2	4	3	2	7.9	7.9	7.9	73.476	647	647;684;136	1	32	0	4.8198	7.9	5.3	2.8	357130000	26654000	32069000	22294000	1	0	0	4
G5E9W7;G5E9V5;P82650;H7C5F2;H7C5H3;Q9H3I1;C9J5D8	G5E9W7;G5E9V5;P82650;H7C5F2;H7C5H3;Q9H3I1	8;8;8;4;4;4;1	8;8;8;4;4;4;1	8;8;8;4;4;4;1	59834000	91184000	80607000	28S ribosomal protein S22, mitochondrial	MRPS22	;;;;;	7	8	8	8	5	3	5	5	3	5	5	3	5	38.6	38.6	38.6	36.805	319	319;359;360;165;200;168;51	1	56	0	21.448	26.6	13.8	26	981910000	67534000	67034000	87741000	4	1	1	21
G5EA30;Q92879-5;Q92879-2;Q92879-3;Q92879-6;Q92879;Q92879-4;E9PSH0;E9PQK4;E9PKU1;E9PKA1;F5H4Y5;F5H0D8;B4DIB6;V9GYD9;Q5VZZ6;E9PC62;O95319-5;O95319-2;O95319;O95319-4;O95319-3	G5EA30;Q92879-5;Q92879-2;Q92879-3;Q92879-6;Q92879;Q92879-4	12;12;12;12;12;12;12;5;4;4;2;2;2;1;1;1;1;1;1;1;1;1	12;12;12;12;12;12;12;5;4;4;2;2;2;1;1;1;1;1;1;1;1;1	12;12;12;12;12;12;12;5;4;4;2;2;2;1;1;1;1;1;1;1;1;1	430640000	450230000	430780000	CUGBP Elav-like family member 1	CELF1	;;;;;;	22	12	12	12	11	10	10	11	10	10	11	10	10	23.3	23.3	23.3	55.142	514	514;468;482;483;485;486;512;95;87;114;56;78;103;403;440;502;521;488;490;508;509;521	1	169	0	44.168	21.8	19.8	19.8	5459700000	446960000	387050000	451390000	5	3	3	70
G5EA36;P30260;P30260-2;B4DL80;I3L394;I3L2Z8;I3L328;I3L3H6;F6QPS0	G5EA36;P30260;P30260-2;B4DL80;I3L394	6;6;6;5;3;1;1;1;1	6;6;6;5;3;1;1;1;1	6;6;6;5;3;1;1;1;1	30511000	39239000	0	Cell division cycle protein 27 homolog	CDC27	;;;;	9	6	6	6	4	4	3	4	4	3	4	4	3	7.2	7.2	7.2	91.737	823	823;824;830;763;163;86;113;233;343	1	55	0	5.7074	4.9	4.9	3.6	425290000	33394000	34293000	13216000	1	1	1	18
G5EA52;P30101	G5EA52;P30101	38;38	37;37	31;31	15907000000	15195000000	16896000000	Protein disulfide-isomerase A3	PDIA3	;	2	38	37	31	36	33	33	36	33	33	30	27	27	72.8	72.8	61.9	54.963	485	485;505	1	720	0	323.31	69.7	69.3	66.6	198340000000	16353000000	14120000000	14753000000	52	39	38	569
G8JLB6;P31943;E9PCY7;D6RBM0;D6RIT2;D6RIU0;D6RAM1;D6R9T0;D6RFM3;E7EN40;D6RDU3;D6RJ04;D6RIH9;H0YB39;E7EQJ0;E5RGV0;H0YBD7;D6RDL0;H0YBG7;D6RF17;E5RGH4;H0YAQ2;F5GZT4;D6R9D3;E5RJ94	G8JLB6;P31943;E9PCY7;D6RBM0;D6RIT2;D6RIU0;D6RAM1;D6R9T0;D6RFM3;E7EN40;D6RDU3;D6RJ04;D6RIH9;H0YB39	20;20;19;13;11;11;10;10;10;10;10;10;10;10;9;9;8;7;5;4;4;4;4;3;2	20;20;19;13;11;11;10;10;10;10;10;10;10;10;9;9;8;7;5;4;4;4;4;3;2	11;11;10;7;8;7;7;7;7;6;7;7;7;4;7;4;3;6;2;4;1;1;2;3;2	4478300000	4853900000	5026100000	Heterogeneous nuclear ribonucleoprotein H;Heterogeneous nuclear ribonucleoprotein H, N-terminally processed	HNRNPH1	;;;;;;;;;;;;;	25	20	20	11	17	19	20	17	19	20	8	11	11	52.8	52.8	32.2	51.229	472	472;449;429;212;164;168;130;161;163;166;171;172;184;277;115;155;194;84;185;49;100;131;159;40;28	1	441	0	323.31	43.9	52.8	52.8	57690000000	4461000000	4890100000	5481600000	30	30	31	333
H0Y4G9;Q99836-5;Q99836;Q99836-6;Q99836-2;Q99836-3;Q99836-4	H0Y4G9;Q99836-5;Q99836;Q99836-6;Q99836-2	8;8;8;8;6;3;2	8;8;8;8;6;3;2	8;8;8;8;6;3;2	91170000	90912000	100660000	Myeloid differentiation primary response protein MyD88	MYD88	;;;;	7	8	8	8	7	6	6	7	6	6	7	6	6	32.3	32.3	32.3	35.312	316	316;275;296;304;251;191;146	1	81	0	16.244	28.2	25.6	25.9	1193700000	108230000	86042000	77208000	1	5	4	31
H0Y517;H7C1U3;Q5T0F9-3;Q5T0F9-2;Q5T0F9;Q5T0F9-4	H0Y517;H7C1U3;Q5T0F9-3;Q5T0F9-2;Q5T0F9;Q5T0F9-4	5;5;5;5;5;3	5;5;5;5;5;3	5;5;5;5;5;3	48904000	0	0	Coiled-coil and C2 domain-containing protein 1B	CC2D1B	;;;;;	6	5	5	5	3	1	1	3	1	1	3	1	1	10.2	10.2	10.2	69.548	628	628;672;532;852;858;214	1	22	0	7.7474	5.4	1.3	2.5	394900000	73739000	55654000	22006000	2	1	0	10
H0Y5H9;P48594;F8W9L1;C9JZ65	H0Y5H9;P48594;F8W9L1	10;10;9;3	3;3;3;1	3;3;3;1	22402000	22269000	0	Serpin B4	SERPINB4;SERPINB3	;;	4	10	3	3	8	7	6	2	2	1	2	2	1	31.8	11.3	11.3	42.388	371	371;390;338;211	1	20	0	31.478	25.1	22.9	20.2	222340000	23377000	21552000	8666400	1	2	0	9
H0Y612;Q9UPN9-2;Q9UPN9;E7EN20	H0Y612;Q9UPN9-2;Q9UPN9	6;6;6;2	6;6;6;2	6;6;6;2	54027000	53526000	53695000	E3 ubiquitin-protein ligase TRIM33	TRIM33	;;	4	6	6	6	2	4	4	2	4	4	2	4	4	7.5	7.5	7.5	98.891	888	888;1110;1127;759	1	42	0	24.059	3.5	6.1	6.1	606590000	35293000	56720000	57749000	1	2	1	16
H0Y621;H7BXI5;H0Y5K5;E9PFA8;Q9Y282-2;Q9Y282;Q9Y282-3;A6PVJ2	H0Y621;H7BXI5;H0Y5K5;E9PFA8;Q9Y282-2;Q9Y282;Q9Y282-3	4;4;4;4;4;4;4;1	4;4;4;4;4;4;4;1	4;4;4;4;4;4;4;1	120600000	110480000	84667000	Endoplasmic reticulum-Golgi intermediate compartment protein 3	ERGIC3	;;;;;;	8	4	4	4	2	3	2	2	3	2	2	3	2	16	16	16	36.851	326	326;388;397;398;230;383;388;118	1	33	0	9.8414	7.1	11.3	7.1	1249600000	86904000	101280000	61305000	1	1	2	13
H0Y626;O95361;B3KP96;K7ENN8;J3KPT5;O95361-2;J3QKY5;K7EL43;I3L1X9;I3L3K9;I3L2F3;Q309B1;J3QL38	H0Y626;O95361;B3KP96;K7ENN8;J3KPT5;O95361-2	7;7;6;4;4;4;3;3;2;2;2;2;1	7;7;6;4;4;4;3;3;2;2;2;2;1	7;7;6;4;4;4;3;3;2;2;2;2;1	144810000	150110000	184650000	Tripartite motif-containing protein 16	TRIM16	;;;;;	13	7	7	7	4	4	4	4	4	4	4	4	4	9.4	9.4	9.4	107.97	953	953;564;434;232;402;348;115;184;115;224;232;348;96	1	84	0	37.776	6	6	6.2	2093900000	144840000	106500000	148800000	3	2	2	31
H0Y6C3;Q53H96;B5MD87;F8WEI0	H0Y6C3;Q53H96;B5MD87	5;5;3;1	5;5;3;1	5;5;3;1	77494000	81189000	78518000	Pyrroline-5-carboxylate reductase 3	PYCRL	;;	4	5	5	5	2	3	3	2	3	3	2	3	3	27.6	27.6	27.6	27.138	261	261;274;137;44	1	50	0	21.457	14.2	18.4	18.4	1033100000	57765000	75293000	77226000	3	1	3	31
H0Y6I0;Q13439-3;Q13439-4;Q13439;Q13439-5;E7EVX2	H0Y6I0;Q13439-3;Q13439-4;Q13439;Q13439-5	4;4;4;4;4;1	4;4;4;4;4;1	4;4;4;4;4;1	27222000	33586000	0	Golgin subfamily A member 4	GOLGA4	;;;;	6	4	4	4	2	3	1	2	3	1	2	3	1	2.5	2.5	2.5	246.6	2099	2099;2223;2228;2230;2243;445	1	30	0	14.702	1.6	2	0.6	321190000	23195000	38843000	6702000	1	1	0	13
H0Y7A7;P62158;E7ETZ0;E7EMB3;M0QZ52;Q96HY3;F8WBR5;G3V479;G3V361;G3V226;P27482;C9J7T9;P02585	H0Y7A7;P62158;E7ETZ0;E7EMB3;M0QZ52;Q96HY3	11;11;10;10;6;6;5;5;5;3;2;1;1	11;11;10;10;6;6;5;5;5;3;2;1;1	11;11;10;10;6;6;5;5;5;3;2;1;1	6616500000	6710400000	6767600000	Calmodulin	CALM2;CALM1;CALM3	;;;;;	13	11	11	11	11	11	11	11	11	11	11	11	11	48.1	48.1	48.1	20.762	187	187;149;150;196;83;113;65;83;98;76;149;145;160	1	246	0	323.31	48.1	48.1	48.1	81621000000	6792300000	6339500000	6331900000	13	13	13	162
H0Y818;P40692;P40692-2;P40692-3;H0Y806;B7Z821	H0Y818;P40692;P40692-2;P40692-3	4;4;2;2;1;1	4;4;2;2;1;1	4;4;2;2;1;1	27991000	0	29961000	DNA mismatch repair protein Mlh1	MLH1	;;;	6	4	4	4	2	1	2	2	1	2	2	1	2	10.6	10.6	10.6	75.747	679	679;756;515;658;114;460	1	24	0	23.481	6.2	2.8	6.2	267920000	24564000	11473000	26998000	1	1	1	17
H0Y8C3;Q9NZJ7-2;Q9NZJ7;Q5TDC2;B4E0C5;Q9NZJ7-3	H0Y8C3;Q9NZJ7-2;Q9NZJ7;Q5TDC2	7;7;7;5;3;2	7;7;7;5;3;2	7;7;7;5;3;2	211820000	188800000	215670000	Mitochondrial carrier homolog 1	MTCH1	;;;	6	7	7	7	5	7	7	5	7	7	5	7	7	21.3	21.3	21.3	43.121	394	394;372;389;357;254;171	1	110	0	16.103	15.2	21.3	21.3	2683700000	167990000	196750000	206410000	4	5	4	48
H0Y8X4;O43598;O43598-2	H0Y8X4;O43598;O43598-2	6;6;3	6;6;3	6;6;3	161140000	174670000	182180000	2-deoxynucleoside 5-phosphate N-hydrolase 1	DNPH1	;;	3	6	6	6	4	4	3	4	4	3	4	4	3	28	28	28	25.868	243	243;174;148	1	58	0	35.989	24.3	17.7	17.3	2037900000	108560000	188450000	104160000	2	1	1	27
H0Y9G6;E7ETU7;P09001;D6RC14;E9PF06;D6RBQ5	H0Y9G6;E7ETU7;P09001;D6RC14;E9PF06	5;5;5;4;4;1	5;5;5;4;4;1	5;5;5;4;4;1	83423000	85730000	0	39S ribosomal protein L3, mitochondrial	MRPL3	;;;;	6	5	5	5	5	4	2	5	4	2	5	4	2	17.4	17.4	17.4	40.47	363	363;375;348;155;176;28	1	47	0	9.2565	17.4	13.2	4.4	882430000	96528000	70897000	40026000	3	1	0	21
H0YA80;P63146;H0Y9V2	H0YA80;P63146;H0Y9V2	2;2;1	1;1;1	1;1;1	0	55400000	0	Ubiquitin-conjugating enzyme E2 B	UBE2B	;;	3	2	1	1	1	2	2	1	1	1	1	1	1	26.8	12.3	12.3	15.38	138	138;152;141	1	14	0.0029169	2.359	12.3	26.8	26.8	442620000	46497000	49709000	42994000	0	2	0	5
H0YAN8;O15013-7;O15013-4;O15013-5;O15013;O15013-6;E9PB39;B4DTE2;Q5VXI4;Q9HCE6-5;Q9HCE6-3;Q9HCE6-2;Q9HCE6	H0YAN8;O15013-7;O15013-4;O15013-5;O15013;O15013-6;E9PB39	4;4;4;4;4;3;2;1;1;1;1;1;1	4;4;4;4;4;3;2;1;1;1;1;1;1	4;4;4;4;4;3;2;1;1;1;1;1;1	17360000	21626000	19548000	Rho guanine nucleotide exchange factor 10	ARHGEF10	;;;;;;	13	4	4	4	3	2	2	3	2	2	3	2	2	4.1	4.1	4.1	109.65	988	988;1306;1340;1344;1369;1368;610;488;1052;1067;1235;1240;1279	1	32	0	3.8086	2.4	1.5	1.5	231650000	17224000	17350000	15759000	1	1	1	11
H0YB13;O76061;E5RG57	H0YB13;O76061	3;3;1	3;3;1	3;3;1	58669000	67622000	60033000	Stanniocalcin-2	STC2	;	3	3	3	3	2	3	3	2	3	3	2	3	3	23.6	23.6	23.6	13.775	123	123;302;53	1	35	0	4.3019	17.1	23.6	23.6	763230000	34579000	66435000	66909000	2	1	1	18
H0YD13;E7EPC6;P16070-18;P16070-12;P16070-14;P16070-13;P16070-11;P16070-10;P16070-16;P16070-8;P16070-17;P16070-6;P16070-4;P16070-3;P16070-7;P16070-5;P16070;H0Y2P0;H0YE40;H0YDW7;H0YCV9;H0Y5E4;P16070-15;P16070-9;E9PKC6;H0YDX6;J3KN83;Q86UZ1;H0YD17;P16070-19	H0YD13;E7EPC6;P16070-18;P16070-12;P16070-14;P16070-13;P16070-11;P16070-10;P16070-16;P16070-8;P16070-17;P16070-6;P16070-4;P16070-3;P16070-7;P16070-5;P16070;H0Y2P0;H0YE40	10;10;10;10;10;10;10;10;10;10;10;10;10;10;10;10;10;9;6;4;4;4;4;4;3;3;3;2;2;2	10;10;10;10;10;10;10;10;10;10;10;10;10;10;10;10;10;9;6;4;4;4;4;4;3;3;3;2;2;2	10;10;10;10;10;10;10;10;10;10;10;10;10;10;10;10;10;9;6;4;4;4;4;4;3;3;3;2;2;2	4782200000	5300000000	4670400000	CD44 antigen	CD44	;;;;;;;;;;;;;;;;;;	30	10	10	10	10	10	10	10	10	10	10	10	10	47.6	47.6	47.6	22.683	206	206;714;340;361;396;425;429;493;668;674;691;699;699;711;713;734;742;287;82;240;249;294;294;675;78;181;232;80;229;139	1	215	0	62.169	47.6	47.6	47.6	60373000000	5279600000	5076800000	4763600000	16	15	11	136
H0YDJ3;F5H2U2;Q13523	H0YDJ3;F5H2U2;Q13523	4;4;4	4;4;4	4;4;4	36629000	38059000	35291000	Serine/threonine-protein kinase PRP4 homolog	PRPF4B	;;	3	4	4	4	3	2	4	3	2	4	3	2	4	9	9	9	68.4	587	587;993;1007	1	38	0	7.845	7.2	4.6	9	403270000	35866000	24175000	34836000	3	1	1	15
H0YDK8;E7EWT3;Q5T1Z4;Q5T1Z8;Q14671-2;Q14671-3;H0YC97;H0YDC5	H0YDK8;E7EWT3;Q5T1Z4;Q5T1Z8;Q14671-2;Q14671-3	7;7;7;7;7;7;3;1	7;7;7;7;7;7;3;1	1;1;1;1;1;1;1;0	80269000	84507000	0	Pumilio homolog 1	PUM1	;;;;;	8	7	7	1	6	6	4	6	6	4	1	1	0	11.2	11.2	1.9	95.696	900	900;1044;1189;1224;1162;1188;227;217	1	55	0	10.759	8.7	8.7	4.6	1069200000	112250000	114600000	93973000	2	2	0	16
H0YDR3;Q8N5M4;E9PKV8	H0YDR3;Q8N5M4;E9PKV8	3;3;2	3;3;2	3;3;2	166180000	147280000	164880000	Tetratricopeptide repeat protein 9C	TTC9C	;;	3	3	3	3	3	3	3	3	3	3	3	3	3	55.1	55.1	55.1	8.1571	69	69;171;140	1	49	0	24.709	55.1	55.1	55.1	1887800000	137290000	154180000	171710000	2	3	3	32
H0YDU8;P53041;A8MU39;M0R196;E7EU14	H0YDU8;P53041;A8MU39	20;20;13;1;1	20;20;13;1;1	20;20;13;1;1	1186800000	1276700000	1362400000	Serine/threonine-protein phosphatase;Serine/threonine-protein phosphatase 5	PPP5C	;;	5	20	20	20	17	19	18	17	19	18	17	19	18	49.1	49.1	49.1	55.096	485	485;499;371;125;171	1	316	0	164.09	42.7	46.6	45.2	15296000000	1135100000	1083800000	1474600000	12	15	13	174
H0YEB6;O60232;G3V1B8;H0YEK1;E9PN57;E9PK41	H0YEB6;O60232;G3V1B8	6;6;5;2;1;1	6;6;5;2;1;1	6;6;5;2;1;1	140590000	208570000	224720000	Sjoegren syndrome/scleroderma autoantigen 1	SSSCA1	;;	6	6	6	6	4	6	5	4	6	5	4	6	5	61.1	61.1	61.1	20.916	193	193;199;162;107;60;81	1	77	0	17.05	38.3	61.1	47.2	2670900000	124780000	179640000	255400000	1	5	5	45
H0YEF3;E9PN81;Q8TDP1-2;Q8TDP1;H0YE52;H0YCP5;E9PKP0	H0YEF3;E9PN81;Q8TDP1-2;Q8TDP1;H0YE52;H0YCP5;E9PKP0	4;4;4;4;3;3;2	4;4;4;4;3;3;2	4;4;4;4;3;3;2	39470000	0	0	Ribonuclease H2 subunit C	RNASEH2C	;;;;;;	7	4	4	4	3	2	1	3	2	1	3	2	1	43.7	43.7	43.7	17.12	158	158;247;163;164;124;129;81	1	28	0	9.1203	34.2	15.8	9.5	389150000	35593000	22531000	15625000	1	0	0	6
H0YFA4;P52943;P52943-2;H0YHD8	H0YFA4;P52943;P52943-2	3;3;3;1	3;3;3;1	3;3;3;1	160410000	132160000	162330000	Cysteine-rich protein 2	CRIP2	;;	4	3	3	3	2	2	2	2	2	2	2	2	2	34.9	34.9	34.9	20.6	192	192;208;282;104	1	41	0	17.189	26.6	26.6	26.6	1842700000	156920000	112780000	149890000	1	0	0	15
H0YFW7;Q9NS93;F5H587;F5GXE1;F5H7C5;F5GWC3;H0YFT0;H0YFM3	H0YFW7;Q9NS93;F5H587;F5GXE1;F5H7C5;F5GWC3;H0YFT0;H0YFM3	2;2;1;1;1;1;1;1	2;2;1;1;1;1;1;1	2;2;1;1;1;1;1;1	0	34607000	0	Transmembrane 7 superfamily member 3	TM7SF3	;;;;;;;	8	2	2	2	1	2	0	1	2	0	1	2	0	12.5	12.5	12.5	16.609	152	152;570;66;86;128;136;144;200	1	11	0.00026123	3.2414	6.6	12.5	0	201000000	22123000	32351000	0	0	1	0	5
H0YH87;F8WB06;F8VQP2;V9GY86;Q99700-2;Q99700-4;Q99700;Q24JQ7;F8VVY6;F8VRK6;F8W0B5	H0YH87;F8WB06;F8VQP2;V9GY86;Q99700-2;Q99700-4;Q99700;Q24JQ7	6;6;6;6;6;6;6;5;1;1;1	5;5;5;5;5;5;5;4;1;1;1	5;5;5;5;5;5;5;4;1;1;1	0	48748000	54378000	Ataxin-2	ATXN2	;;;;;;;	11	6	5	5	3	5	4	2	4	3	2	4	3	8.2	7.3	7.3	98.004	916	916;1050;1073;1153;995;1243;1313;1006;184;235;285	1	43	0	6.2648	3.4	6.3	5.1	518540000	26004000	50191000	38939000	0	3	2	16
H0YJ47;O75843	H0YJ47;O75843	1;1	1;1	1;1	39847000	0	0	AP-1 complex subunit gamma-like 2	AP1G2	;	2	1	1	1	1	1	1	1	1	1	1	1	1	4.6	4.6	4.6	20.96	197	197;785	1	21	0.0093501	1.7	4.6	4.6	4.6	419940000	41696000	6983900	30756000	1	0	0	3
H0YJ75;Q13362-2;Q13362-3;Q13362;Q13362-4;Q13362-5;Q96B13;H0YN84;H0YJ49;H0YJU0;G3V2U3	H0YJ75;Q13362-2;Q13362-3;Q13362;Q13362-4;Q13362-5;Q96B13	9;9;9;9;9;9;7;4;2;2;2	4;4;4;4;4;4;3;2;1;1;1	4;4;4;4;4;4;3;2;1;1;1	51351000	56383000	58069000	Serine/threonine-protein phosphatase 2A 56 kDa regulatory subunit gamma isoform	PPP2R5C	;;;;;;	11	9	4	4	6	5	6	3	3	4	3	3	4	20.6	7.6	7.6	64.063	553	553;449;485;524;540;555;384;89;151;153;216	1	45	0	4.6875	12.3	10.7	11.9	691140000	65369000	43765000	65171000	2	0	1	9
H0YJE5;Q13572-2;Q13572;G3V588;G3V3C0;G3V5A3;G3V4M9	H0YJE5;Q13572-2;Q13572;G3V588;G3V3C0;G3V5A3;G3V4M9	2;2;2;1;1;1;1	2;2;2;1;1;1;1	2;2;2;1;1;1;1	23164000	0	0	Inositol-tetrakisphosphate 1-kinase	ITPK1	;;;;;;	7	2	2	2	2	1	0	2	1	0	2	1	0	14.8	14.8	14.8	26.359	230	230;314;414;168;181;206;295	1	12	0.00050878	2.8795	14.8	5.7	0	139630000	23450000	3837200	0	2	0	0	3
H0YM23;O75179-6;O75179-7;O75179-2;O75179;H0YLQ3;O75179-5;O75179-3;O75179-4;H0YMS3	H0YM23;O75179-6;O75179-7;O75179-2;O75179;H0YLQ3;O75179-5;O75179-3;O75179-4	10;10;10;10;10;5;5;5;5;4	3;3;3;3;3;2;1;1;1;1	3;3;3;3;3;2;1;1;1;1	24966000	0	0	Ankyrin repeat domain-containing protein 17	ANKRD17	;;;;;;;;	10	10	3	3	8	5	6	3	1	2	3	1	2	5.6	1.4	1.4	263.25	2487	2487;2352;2490;2602;2603;862;751;1187;2010;828	1	23	0	5.5601	4.5	2.9	3.2	226730000	49516000	10373000	5863900	2	0	2	11
H0YMB0;Q00978;H0YNP4	H0YMB0;Q00978	3;3;1	3;3;1	3;3;1	0	19864000	0	Interferon regulatory factor 9	IRF9	;	3	3	3	3	1	2	3	1	2	3	1	2	3	8.8	8.8	8.8	38.276	353	353;393;267	1	23	0	5.7046	2.5	6.2	8.8	397130000	16403000	23888000	34316000	0	1	1	6
H0YMV8;Q71UM5;C9JLI6	H0YMV8;Q71UM5;C9JLI6	3;3;2	1;1;1	1;1;1	140500000	122690000	163050000	40S ribosomal protein S27;40S ribosomal protein S27-like	RPS27L	;;	3	3	1	1	3	3	3	1	1	1	1	1	1	32	11	11	11.345	100	100;84;97	1	23	0	33.624	32	32	32	1462600000	146760000	123830000	149240000	2	1	2	12
H0YNG3;P67812-4;P67812;P67812-3;H0YNX5;P67812-2;H0YKT4;H0YNA5;P0C7V7	H0YNG3;P67812-4;P67812;P67812-3;H0YNX5;P67812-2;H0YKT4;H0YNA5	6;6;6;6;4;4;3;3;1	6;6;6;6;4;4;3;3;1	6;6;6;6;4;4;3;3;1	395750000	509650000	421380000	Signal peptidase complex catalytic subunit SEC11;Signal peptidase complex catalytic subunit SEC11A;Signal peptidase I	SEC11A	;;;;;;;	9	6	6	6	6	6	6	6	6	6	6	6	6	27.6	27.6	27.6	18.651	163	163;164;179;185;106;153;129;135;166	1	77	0	11.975	27.6	27.6	27.6	5579100000	449230000	501590000	419670000	2	4	4	35
H0YNW5;P33316-2;P33316;H0YKC5;H0YMM5;H0YNJ9;H0YKI0;H0YMP1	H0YNW5;P33316-2;P33316;H0YKC5;H0YMM5;H0YNJ9;H0YKI0	9;9;9;8;6;6;6;3	9;9;9;8;6;6;6;3	9;9;9;8;6;6;6;3	983130000	946350000	872790000	Deoxyuridine 5-triphosphate nucleotidohydrolase, mitochondrial	DUT	;;;;;;	8	9	9	9	7	8	8	7	8	8	7	8	8	61.7	61.7	61.7	17.827	167	167;164;252;221;133;143;226;107	1	156	0	119.02	54.5	60.5	61.7	11143000000	985300000	902610000	892990000	8	8	8	98
H3BLU7;O43488;H7C5H7;Q8NHP1	H3BLU7;O43488	8;8;1;1	8;8;1;1	8;8;1;1	320500000	226940000	234640000	Aflatoxin B1 aldehyde reductase member 2	AKR7A2	;	4	8	8	8	7	5	6	7	5	6	7	5	6	45.2	45.2	45.2	34.684	314	314;359;205;331	1	109	0	54.383	41.7	27.7	31.2	3450200000	304160000	227790000	146420000	7	6	3	56
H3BLV9;B4DS61;Q96SB4;Q96SB4-3;Q5R363;A8MPP7;A8MPY5;E7ETV6;Q9UPE1-2;Q9UPE1-3;Q9UPE1-4;Q9UPE1;H7C2I2	H3BLV9;B4DS61;Q96SB4;Q96SB4-3;Q5R363	12;12;12;12;9;2;2;2;2;2;2;2;1	12;12;12;12;9;2;2;2;2;2;2;2;1	9;9;9;9;8;0;0;0;0;0;0;0;0	166330000	155300000	175730000	SRSF protein kinase 1	SRPK1	;;;;	13	12	12	9	10	8	6	10	8	6	8	7	6	22.8	22.8	17.6	76.039	671	671;639;655;826;547;492;534;634;491;533;566;567;129	1	106	0	32.499	18.3	16.4	12.5	2032600000	165210000	150480000	118210000	5	4	2	46
H3BLZ8;Q92841;Q92841-1;Q92841-3;C9JMU5;Q92841-2;G5E9L5	H3BLZ8;Q92841;Q92841-1;Q92841-3;C9JMU5;Q92841-2	28;28;27;27;26;26;2	19;19;18;18;18;18;2	19;19;18;18;18;18;2	1735300000	1640900000	1658100000	Probable ATP-dependent RNA helicase DDX17	DDX17	;;;;;	7	28	19	19	26	27	27	18	18	18	18	18	18	42	30.2	30.2	80.439	731	731;729;650;652;652;652;181	1	315	0	199.61	38.7	40.2	42	19551000000	1698500000	1541400000	1490500000	19	10	13	166
H3BM14;H3BM74;Q9Y5A7-2;Q9Y5A7;H7C5N1;H7C5E1;C9J7X7;C9JRT6;F8WDB6	H3BM14;H3BM74;Q9Y5A7-2;Q9Y5A7;H7C5N1	4;4;4;4;2;1;1;1;1	4;4;4;4;2;1;1;1;1	4;4;4;4;2;1;1;1;1	35920000	36899000	34335000	NEDD8 ultimate buster 1	NUB1	;;;;	9	4	4	4	4	2	3	4	2	3	4	2	3	7.7	7.7	7.7	71.921	625	625;639;601;615;202;128;154;254;267	1	34	0	6.5572	7.7	3.8	5.6	422810000	54240000	26843000	27836000	1	0	0	7
H3BM67;H3BUP2;H3BUN4;O60936-2;O60936-3;O60936;J3QLT7;H3BQJ5	H3BM67;H3BUP2;H3BUN4;O60936-2;O60936-3;O60936	5;5;5;5;5;3;1;1	5;5;5;5;5;3;1;1	5;5;5;5;5;3;1;1	84821000	83920000	69225000	Nucleolar protein 3	NOL3	;;;;;	8	5	5	5	3	3	4	3	3	4	3	3	4	59.4	59.4	59.4	14.924	138	138;174;206;208;270;219;131;216	1	52	0	20.189	26.8	26.8	40.6	1003400000	67336000	68626000	63690000	2	2	0	30
H3BMF4;Q9H2V7-3;Q9H2V7-2;Q9H2V7;Q9H2V7-4;H3BR82;H3BPT8;H3BPQ9;Q9H2V7-5;H3BT44	H3BMF4;Q9H2V7-3;Q9H2V7-2;Q9H2V7;Q9H2V7-4;H3BR82	5;5;5;5;4;3;2;2;2;1	5;5;5;5;4;3;2;2;2;1	5;5;5;5;4;3;2;2;2;1	131890000	120850000	117780000	Protein spinster homolog 1	SPNS1	;;;;;	10	5	5	5	5	5	4	5	5	4	5	5	4	11.9	11.9	11.9	61.105	573	573;454;476;528;455;538;179;274;229;178	1	70	0	27.653	11.9	11.9	9.9	1507300000	131910000	114990000	121690000	4	3	2	39
H3BMQ0;P49815-6;P49815-5;P49815-3;P49815-2;P49815-4;P49815;P49815-7;H3BQK4;Q5HYF7	H3BMQ0;P49815-6;P49815-5;P49815-3;P49815-2;P49815-4;P49815;P49815-7;H3BQK4	6;6;6;6;6;6;6;5;3;1	6;6;6;6;6;6;6;5;3;1	6;6;6;6;6;6;6;5;3;1	24428000	0	0	Tuberin	TSC2	;;;;;;;;	10	6	6	6	3	3	2	3	3	2	3	3	2	4.7	4.7	4.7	194.39	1751	1751;1704;1740;1763;1764;1784;1807;1692;535;108	1	28	0	5.9335	2.6	2.6	0.9	213870000	28996000	24844000	4965100	1	0	1	10
H3BNT2;O75208;H3BPY0;H3BPC6;H3BSJ5;H3BPW3;H3BVA5;H3BRC0;O75208-2	H3BNT2;O75208;H3BPY0;H3BPC6;H3BSJ5	3;3;2;2;2;1;1;1;1	3;3;2;2;2;1;1;1;1	3;3;2;2;2;1;1;1;1	43306000	15313000	13332000	Ubiquinone biosynthesis protein COQ9, mitochondrial	COQ9	;;;;	9	3	3	3	2	3	3	2	3	3	2	3	3	15.8	15.8	15.8	33.886	303	303;318;89;188;283;102;172;207;135	1	29	0	4.377	10.6	15.8	15.8	301110000	31253000	24970000	23822000	2	1	0	14
H3BNX8;P20674;H3BRM5;H3BV69;H3BRI0	H3BNX8;P20674;H3BRM5;H3BV69	5;5;3;3;1	5;5;3;3;1	5;5;3;3;1	948890000	955060000	913100000	Cytochrome c oxidase subunit 5A, mitochondrial	COX5A	;;;	5	5	5	5	5	4	5	5	4	5	5	4	5	31.4	31.4	31.4	17.235	153	153;150;69;111;84	1	104	0	8.8711	31.4	30.7	31.4	11223000000	864540000	939570000	872940000	3	4	4	35
H3BP20;P06865;H3BS10;E9PGL4;H3BU85;H3BTD4;B4DKE7	H3BP20;P06865;H3BS10;E9PGL4;H3BU85;H3BTD4	10;10;9;6;5;5;3	10;10;9;6;5;5;3	10;10;9;6;5;5;3	233950000	217700000	210180000	Beta-hexosaminidase;Beta-hexosaminidase subunit alpha	HEXA	;;;;;	7	10	10	10	7	9	7	7	9	7	7	9	7	20.6	20.6	20.6	61.999	540	540;529;509;301;318;373;168	1	99	0	22.726	16.5	16.9	12.8	2680100000	225840000	215410000	176800000	4	3	4	44
H3BP71;O75150;O75150-4;F8W8Z4;O75150-3;H3BQ99;H3BUL6;I3L332;H3BS50	H3BP71;O75150;O75150-4;F8W8Z4;O75150-3	12;12;11;9;8;2;2;2;2	12;12;11;9;8;2;2;2;2	11;11;10;8;7;2;2;2;2	149280000	156170000	167160000	E3 ubiquitin-protein ligase BRE1B	RNF40	;;;;	9	12	12	11	6	7	8	6	7	8	6	7	7	15.6	15.6	14.2	109.02	961	961;1001;901;693;838;111;129;144;174	1	103	0	20.836	7.5	8.3	9.8	1885400000	96568000	122850000	140810000	1	4	2	35
H3BPJ9;O96000;H3BV16;Q96II6	H3BPJ9;O96000;H3BV16;Q96II6	5;5;4;4	5;5;4;4	5;5;4;4	302090000	263740000	295510000	NADH dehydrogenase [ubiquinone] 1 beta subcomplex subunit 10	NDUFB10	;;;	4	5	5	5	5	5	4	5	5	4	5	5	4	38.5	38.5	38.5	19.258	161	161;172;142;168	1	73	0	25.656	38.5	38.5	29.8	3334700000	313820000	250430000	270830000	5	5	4	47
H3BPM8;Q2TA70;B4DFF3;Q13286-4;Q13286-2;B4DXL3;Q13286-3;Q13286;O95090;Q9UBD8;H3BQ48;B4DMY6;Q13286-5;Q13286-6	H3BPM8;Q2TA70;B4DFF3;Q13286-4;Q13286-2;B4DXL3;Q13286-3;Q13286;O95090;Q9UBD8;H3BQ48;B4DMY6;Q13286-5;Q13286-6	2;2;2;2;2;2;2;2;1;1;1;1;1;1	2;2;2;2;2;2;2;2;1;1;1;1;1;1	2;2;2;2;2;2;2;2;1;1;1;1;1;1	77361000	82458000	0	Battenin	CLN3	;;;;;;;;;;;;;	14	2	2	2	2	2	1	2	2	1	2	2	1	9.4	9.4	9.4	36.272	341	341;360;384;321;390;414;421;438;167;181;184;338;253;339	1	36	0	4.692	9.4	9.4	4.4	996610000	68994000	81257000	72669000	0	1	1	10
H3BPU7;H3BPM5;H3BT46;H3BMZ9;H3BPP3;H3BP57;H3BT48;H3BUZ9;H3BPB8;P34949-2;P34949;H3BUG1;H3BU66;H3BN01;H3BQX0;H3BNY8;B4DYB8;F5GX71	H3BPU7;H3BPM5;H3BT46;H3BMZ9;H3BPP3;H3BP57;H3BT48;H3BUZ9;H3BPB8;P34949-2;P34949;H3BUG1;H3BU66;H3BN01;H3BQX0;H3BNY8;B4DYB8;F5GX71	2;2;2;2;2;2;2;2;2;2;2;1;1;1;1;1;1;1	2;2;2;2;2;2;2;2;2;2;2;1;1;1;1;1;1;1	2;2;2;2;2;2;2;2;2;2;2;1;1;1;1;1;1;1	0	30489000	0	Mannose-6-phosphate isomerase	MPI	;;;;;;;;;;;;;;;;;	18	2	2	2	0	2	0	0	2	0	0	2	0	36.1	36.1	36.1	13.228	119	119;173;213;264;287;288;319;339;403;362;423;125;168;174;175;185;228;373	1	8	0.0065329	1.9342	0	36.1	0	130930000	0	28501000	0	0	0	0	4
H3BQH3;Q8TBB5-2;Q8TBB5-3;Q8TBB5	H3BQH3;Q8TBB5-2;Q8TBB5-3;Q8TBB5	2;2;2;2	2;2;2;2	2;2;2;2	0	41396000	0	Kelch domain-containing protein 4	KLHDC4	;;;	4	2	2	2	1	2	1	1	2	1	1	2	1	7.2	7.2	7.2	37.075	334	334;463;489;520	1	9	0.0022266	2.5638	3.9	7.2	3.3	194540000	28224000	38697000	8361100	1	2	0	3
H3BQI7;H3BT52;Q3SXM5-2;Q3SXM5;H3BNH5	H3BQI7;H3BT52;Q3SXM5-2;Q3SXM5;H3BNH5	3;3;3;3;2	3;3;3;3;2	3;3;3;3;2	0	23705000	0	Inactive hydroxysteroid dehydrogenase-like protein 1	HSDL1	;;;;	5	3	3	3	1	2	1	1	2	1	1	2	1	30.6	30.6	30.6	12.11	108	108;111;275;330;70	1	18	0	8.0538	8.3	18.5	8.3	183230000	10077000	22160000	9161600	0	1	0	4
H3BQQ2;Q86UK7-2;Q86UK7-3;Q86UK7	H3BQQ2;Q86UK7-2;Q86UK7-3;Q86UK7	3;3;3;3	3;3;3;3	3;3;3;3	31180000	30791000	31587000	Zinc finger protein 598	ZNF598	;;;	4	3	3	3	3	2	3	3	2	3	3	2	3	4.5	4.5	4.5	93.287	849	849;896;898;904	1	31	0	5.7285	4.5	2.8	4.5	348260000	36233000	25570000	33797000	0	1	1	13
H3BQV3;Q96MW5	H3BQV3;Q96MW5	2;2	2;2	2;2	19389000	0	0	Conserved oligomeric Golgi complex subunit 8	COG8	;	2	2	2	2	2	1	1	2	1	1	2	1	1	4.7	4.7	4.7	60.438	534	534;612	1	13	0	7.8382	4.7	2.1	2.1	116690000	19338000	7094000	11617000	2	0	0	7
H3BQZ7;Q1KMD3	H3BQZ7;Q1KMD3	14;14	14;14	14;14	259190000	268640000	271450000	Heterogeneous nuclear ribonucleoprotein U-like protein 2	HNRNPUL2-BSCL2;HNRNPUL2	;	2	14	14	14	9	11	7	9	11	7	9	11	7	26.8	26.8	26.8	84.69	746	746;747	1	116	0	75.074	19.6	20.9	14.5	2893300000	243800000	264990000	132130000	8	5	5	48
H3BR94;Q9BTE1-2;Q9BTE1;H3BUD2;H3BS05;Q9BTE1-3	H3BR94;Q9BTE1-2;Q9BTE1;H3BUD2;H3BS05;Q9BTE1-3	3;3;3;2;2;2	3;3;3;2;2;2	3;3;3;2;2;2	78653000	81085000	91506000	Dynactin subunit 5	DCTN5	;;;;;	6	3	3	3	3	3	3	3	3	3	3	3	3	20	20	20	16.91	155	155;152;182;53;75;84	1	33	0	4.1896	20	20	20	775090000	83827000	79089000	78917000	0	2	1	8
H3BRL3;O14562;H3BUM8	H3BRL3;O14562	3;3;1	3;3;1	3;3;1	0	53850000	61960000	Ubiquitin domain-containing protein UBFD1	UBFD1	;	3	3	3	3	2	3	2	2	3	2	2	3	2	13.7	13.7	13.7	32.64	300	300;309;190	1	37	0	15.67	9.7	13.7	9.7	733480000	16635000	60255000	49313000	1	1	2	23
H3BSM5;P60520;H3BU36;H3BQ50;F5GZY7;Q9H0R8;Q9H0R8-2	H3BSM5;P60520	3;3;1;1;1;1;1	3;3;1;1;1;1;1	2;2;1;1;0;0;0	223570000	278250000	239060000	Gamma-aminobutyric acid receptor-associated protein-like 2	GABARAPL2	;	7	3	3	2	2	3	2	2	3	2	1	2	1	26.1	26.1	18.2	10.401	88	88;117;42;57;70;117;146	1	39	0.004496	2.0566	17	26.1	17	2591300000	211240000	268670000	204800000	1	3	1	17
H3BT71;P38159;H3BR27;H0Y6E7;P38159-2;H3BNC1;Q96E39;O75526;Q8N7X1	H3BT71;P38159;H3BR27;H0Y6E7;P38159-2;H3BNC1;Q96E39;O75526	6;6;5;5;5;3;3;3;1	6;6;5;5;5;3;3;3;1	1;1;0;1;1;0;0;0;0	274030000	310930000	335270000	RNA-binding motif protein, X chromosome;RNA-binding motif protein, X chromosome, N-terminally processed;RNA binding motif protein, X-linked-like-1;RNA-binding motif protein, X-linked-like-2	RBMX;RBMXL1;RBMXL2	;;;;;;;	9	6	6	1	5	6	5	5	6	5	1	1	1	21.6	21.6	4.4	32.197	296	296;391;78;292;378;37;390;392;1067	1	97	0	20.585	18.9	21.6	18.9	3547000000	259020000	326110000	306330000	5	3	3	49
H3BTL1;Q9GZQ8;A6NCE7;Q9H492;Q9H492-2	H3BTL1;Q9GZQ8;A6NCE7;Q9H492;Q9H492-2	2;2;2;1;1	2;2;2;1;1	2;2;2;1;1	314850000	354580000	329870000	Microtubule-associated proteins 1A/1B light chain 3B;Microtubule-associated proteins 1A/1B light chain 3 beta 2;Microtubule-associated proteins 1A/1B light chain 3A	MAP1LC3B;MAP1LC3B2;MAP1LC3A	;;;;	5	2	2	2	2	2	2	2	2	2	2	2	2	28	28	28	9.0115	75	75;125;125;121;125	1	36	0	13.079	28	28	28	3771700000	312060000	326360000	310460000	1	3	2	26
H3BU93;Q9GZU8;H3BNK9;H3BUL4;H3BMX9;H3BQQ6;H3BTI2;H3BTP8;H3BSY6;H3BP64	H3BU93;Q9GZU8;H3BNK9;H3BUL4;H3BMX9	3;3;2;2;2;1;1;1;1;1	3;3;2;2;2;1;1;1;1;1	3;3;2;2;2;1;1;1;1;1	48176000	0	80192000	Protein FAM192A	FAM192A	;;;;	10	3	3	3	3	2	3	3	2	3	3	2	3	16.4	16.4	16.4	19.351	177	177;254;154;160;165;96;106;130;140;148	1	34	0	6.8186	16.4	7.9	16.4	836590000	36655000	71634000	102300000	0	0	1	13
H3BUF6;Q8WWM7-6;Q8WWM7-8;Q8WWM7-5;Q8WWM7-4;Q8WWM7-9;Q8WWM7-2;Q8WWM7;Q8WWM7-3;H3BSK9;Q8WWM7-7;H3BSQ5;H3BUE3;S4R3J6;H3BRB0;F8WB05	H3BUF6;Q8WWM7-6;Q8WWM7-8;Q8WWM7-5;Q8WWM7-4;Q8WWM7-9;Q8WWM7-2;Q8WWM7;Q8WWM7-3;H3BSK9	23;23;23;23;23;23;23;23;23;12;11;5;5;1;1;1	23;23;23;23;23;23;23;23;23;12;11;5;5;1;1;1	22;22;22;22;22;22;22;22;22;12;11;5;5;0;1;0	680630000	685180000	605890000	Ataxin-2-like protein	ATXN2L	;;;;;;;;;	16	23	23	22	20	18	21	20	18	21	19	17	20	24.6	24.6	23.9	112.71	1068	1068;968;1044;1044;1044;1062;1062;1075;1097;336;399;91;217;107;401;424	1	268	0	68.976	21.2	17.7	22.3	7778400000	679720000	640350000	602530000	7	10	9	124
H3BV80;H3BMM9;H3BTC0;Q15287;H3BMS0;Q15287-3;Q15287-2;H3BPG5;H3BRK4;H3BTV0;H3BNI3;H3BP82;H3BTR6;H3BUG0;H3BTY0;H3BNU7;H3BUL0	H3BV80;H3BMM9;H3BTC0;Q15287;H3BMS0;Q15287-3;Q15287-2;H3BPG5	4;4;4;4;3;3;3;2;1;1;1;1;1;1;1;1;1	4;4;4;4;3;3;3;2;1;1;1;1;1;1;1;1;1	4;4;4;4;3;3;3;2;1;1;1;1;1;1;1;1;1	85739000	90564000	82204000	RNA-binding protein with serine-rich domain 1	RNPS1	;;;;;;;	17	4	4	4	3	3	3	3	3	3	3	3	3	19.9	19.9	19.9	24.561	211	211;284;302;305;257;268;282;128;29;45;85;98;127;139;150;156;169	1	45	0	20.059	16.6	16.6	16.6	1034900000	98098000	91111000	87817000	2	2	2	24
H3BVF7;Q0P6H9;H3BPV2	H3BVF7;Q0P6H9	6;6;2	6;6;2	6;6;2	30121000	33048000	0	Transmembrane protein 62	TMEM62	;	3	6	6	6	3	4	2	3	4	2	3	4	2	13.7	13.7	13.7	61.933	540	540;643;129	1	45	0	9.9565	5.6	8.1	3.7	411160000	20092000	22450000	9355000	0	0	1	9
H3BVG0;Q8N1F7;Q8N1F7-2;H3BRI8;H3BM93;H3BNN5;H3BV11;H3BPA9;H3BP95;H3BMX0;H3BVE2;H3BRD9;H3BNG7;H3BV15	H3BVG0;Q8N1F7;Q8N1F7-2	18;18;13;6;6;5;5;5;4;3;2;2;1;1	18;18;13;6;6;5;5;5;4;3;2;2;1;1	18;18;13;6;6;5;5;5;4;3;2;2;1;1	225090000	230710000	230750000	Nuclear pore complex protein Nup93	NUP93	;;	14	18	18	18	17	11	13	17	11	13	17	11	13	26	26	26	99.554	880	880;819;696;151;178;132;136;229;156;125;117;140;40;84	1	172	0	33.921	24.8	16.7	20.3	2832400000	254470000	234570000	187290000	5	4	3	59
H7BXH2;E9PKF6;G8JLI3;Q5H9R7-6;Q5H9R7-2;Q5H9R7;Q5H9R7-5;Q5H9R7-3;Q5H9R7-4;E9PQP7;E9PK08;H0YEN2;E9PNN8;E9PJD8;E9PKG4;H0YDW1	H7BXH2;E9PKF6;G8JLI3;Q5H9R7-6;Q5H9R7-2;Q5H9R7;Q5H9R7-5;Q5H9R7-3;Q5H9R7-4;E9PQP7	18;18;18;18;18;18;18;17;17;11;7;7;6;2;2;2	18;18;18;18;18;18;18;17;17;11;7;7;6;2;2;2	18;18;18;18;18;18;18;17;17;11;7;7;6;2;2;2	363640000	365600000	391660000	Serine/threonine-protein phosphatase 6 regulatory subunit 3	PPP6R3	;;;;;;;;;	16	18	18	18	14	15	14	14	15	14	14	15	14	25.6	25.6	25.6	92.407	827	827;838;879;844;867;873;879;791;793;641;140;580;186;39;75;112	1	214	0	47.996	20.9	20.9	19.3	4444200000	396170000	404630000	386020000	7	3	7	73
H7BXI1;A0FGR8-2;A0FGR8;A0FGR8-6;A0FGR8-4;F2Z3K9;A0FGR8-5	H7BXI1;A0FGR8-2;A0FGR8;A0FGR8-6;A0FGR8-4;F2Z3K9;A0FGR8-5	16;16;16;16;9;8;8	16;16;16;16;9;8;8	16;16;16;16;9;8;8	270800000	315830000	354060000	Extended synaptotagmin-2	ESYT2	;;;;;;	7	16	16	16	12	13	12	12	13	12	12	13	12	28.6	28.6	28.6	98.008	884	884;893;921;942;527;328;328	1	179	0	69.467	22.2	22.2	21.6	3548400000	299970000	317820000	293720000	5	5	7	70
H7BXY3;Q7L2E3-3;Q7L2E3;Q7L2E3-2	H7BXY3;Q7L2E3-3;Q7L2E3;Q7L2E3-2	21;21;21;21	21;21;21;21	21;21;21;21	314690000	259630000	290110000	Putative ATP-dependent RNA helicase DHX30	DHX30	;;;	4	21	21	21	18	16	14	18	16	14	18	16	14	20.8	20.8	20.8	130.55	1166	1166;1155;1194;1222	1	187	0	42.981	17.6	16	14.3	3284200000	329570000	272250000	253170000	11	3	7	74
H7BY58;P22061;P22061-2;B7Z972;F8WDT3;F8WAV5;F8WAX2;C9J0F2;H7C4X2	H7BY58;P22061;P22061-2;B7Z972	11;11;11;9;3;3;3;2;1	11;11;11;9;3;3;3;2;1	11;11;11;9;3;3;3;2;1	1434100000	1471200000	1588300000	Protein-L-isoaspartate O-methyltransferase;Protein-L-isoaspartate(D-aspartate) O-methyltransferase	PCMT1	;;;	9	11	11	11	10	9	10	10	9	10	10	9	10	49.7	49.7	49.7	30.358	286	286;227;228;192;120;124;130;96;67	1	191	0	85.322	49.7	45.1	49.7	17580000000	1518300000	1368200000	1523800000	11	6	11	123
H7BYN4;Q02241-2;Q02241;B4E1K0;H0YME6;H0YMJ4;H0YKQ5	H7BYN4;Q02241-2;Q02241;B4E1K0	6;6;6;4;2;1;1	6;6;6;4;2;1;1	6;6;6;4;2;1;1	0	0	26011000	Kinesin-like protein;Kinesin-like protein KIF23	KIF23	;;;	7	6	6	6	3	2	2	3	2	2	3	2	2	9.2	9.2	9.2	109.13	952	952;856;960;673;371;109;267	1	30	0	14.322	5.1	2.6	2.6	319520000	27582000	37063000	19361000	0	0	1	8
H7BZJ3	H7BZJ3	7	1	1	710260000	857560000	909080000		PDIA3		1	7	1	1	7	7	7	1	1	1	1	1	1	54.5	11.4	11.4	13.519	123	123	1	24	0	21.937	54.5	54.5	54.5	10465000000	727230000	767960000	843050000	1	0	1	14
H7BZT4;P61956-2;P61956;Q6EEV6	H7BZT4;P61956-2;P61956;Q6EEV6	2;2;2;1	2;2;2;1	1;1;1;0	1304100000	1327600000	1269900000	Small ubiquitin-related modifier 2;Small ubiquitin-related modifier 4	SUMO2;SUMO4	;;;	4	2	2	1	2	2	2	2	2	2	1	1	1	23.2	23.2	10.5	10.839	95	95;71;95;95	1	45	0	17.775	23.2	23.2	23.2	15147000000	1112100000	971380000	953470000	1	2	2	28
H7BZW6;X6RAL5;O00422;U3KPY7	H7BZW6;X6RAL5;O00422	5;5;5;2	5;5;5;2	5;5;5;2	65519000	66878000	0	Histone deacetylase complex subunit SAP18	SAP18	;;	4	5	5	5	3	4	3	3	4	3	3	4	3	49.7	49.7	49.7	16.036	143	143;172;153;78	1	54	0	9.3276	33.6	43.4	33.6	768890000	71976000	65841000	70091000	1	1	0	13
H7C0D5;Q9BSR8	H7C0D5;Q9BSR8	2;2	2;2	2;2	0	61449000	73591000	Protein YIPF4	YIPF4	;	2	2	2	2	1	2	2	1	2	2	1	2	2	31	31	31	6.447	58	58;244	1	18	0.00026947	3.6191	15.5	31	31	693350000	37994000	54935000	71488000	1	0	1	8
H7C0E5;O75312;H7BZM7	H7C0E5;O75312;H7BZM7	7;7;6	7;7;6	7;7;6	0	82211000	71969000	Zinc finger protein ZPR1	ZPR1	;;	3	7	7	7	2	4	4	2	4	4	2	4	4	23.1	23.1	23.1	42.542	386	386;459;430	1	58	0	21.522	6	12.2	12.7	857230000	12211000	50680000	57231000	1	1	0	17
H7C0X4;Q92685;B4DS50;C9J7S5;Q92685-2;F8WF93;H7BZZ2;F8WE30	H7C0X4;Q92685;B4DS50;C9J7S5;Q92685-2	4;4;3;3;3;1;1;1	4;4;3;3;3;1;1;1	4;4;3;3;3;1;1;1	34680000	32534000	0	Dol-P-Man:Man(5)GlcNAc(2)-PP-Dol alpha-1,3-mannosyltransferase	ALG3	;;;;	8	4	4	4	2	3	1	2	3	1	2	3	1	13.3	13.3	13.3	36.898	323	323;438;382;398;390;65;105;107	1	32	0	5.9824	6.8	9.9	3.1	442460000	39014000	35312000	15991000	1	0	1	14
H7C173;H7C202;B8ZZ87;Q6P582;Q6NZ67;H7BZ50	H7C173;H7C202;B8ZZ87;Q6P582;Q6NZ67;H7BZ50	3;3;3;3;3;2	3;3;3;3;3;2	3;3;3;3;3;2	38150000	0	28452000	Mitotic-spindle organizing protein 2A;Mitotic-spindle organizing protein 2B	MZT2B;MZT2A	;;;;;	6	3	3	3	3	2	2	3	2	2	3	2	2	34.4	34.4	34.4	12.395	122	122;140;218;158;158;121	1	30	0	4.879	34.4	16.4	16.4	358350000	44575000	11006000	24896000	3	3	2	18
H7C1N3;O15155;C9JTT8;Q68DU7;Q96EA0	H7C1N3;O15155;C9JTT8;Q68DU7;Q96EA0	2;2;1;1;1	2;2;1;1;1	2;2;1;1;1	136290000	103450000	105610000	BET1 homolog	BET1;DKFZp781C0425	;;;;	5	2	2	2	2	2	2	2	2	2	2	2	2	21.8	21.8	21.8	14.872	133	133;118;98;127;83	1	41	0	28.957	21.8	21.8	21.8	1444300000	156540000	104580000	83990000	3	3	2	32
H7C1U8;C9J574;Q9BUR5-2;Q9BUR5;G3V1B6	H7C1U8;C9J574;Q9BUR5-2;Q9BUR5;G3V1B6	4;4;4;4;2	4;4;4;4;2	4;4;4;4;2	92594000	75912000	72721000	Apolipoprotein O	APOO	;;;;	5	4	4	4	3	4	2	3	4	2	3	4	2	24.2	24.2	24.2	20.08	178	178;179;180;198;114	1	42	0	9.2131	20.2	24.2	10.1	1050000000	104430000	98095000	43732000	0	2	1	23
H7C2Q8;Q99848	H7C2Q8;Q99848	4;4	4;4	4;4	53285000	58028000	52426000	Probable rRNA-processing protein EBP2	EBNA1BP2	;	2	4	4	4	2	2	3	2	2	3	2	2	3	14.7	14.7	14.7	40.684	361	361;306	1	34	0	8.2446	5.5	5.5	11.6	597650000	43091000	42543000	48256000	2	1	2	22
H7C389;Q8ND98;Q96MX6-2;Q96MX6	H7C389;Q8ND98;Q96MX6-2;Q96MX6	3;3;3;3	3;3;3;3	3;3;3;3	42662000	33294000	0	WD repeat-containing protein 92	WDR92;DKFZp434B156	;;;	4	3	3	3	2	2	2	2	2	2	2	2	2	34.8	34.8	34.8	10.392	92	92;187;288;357	1	31	0.00051138	2.9217	27.2	17.4	27.2	396040000	38888000	20726000	30357000	1	1	0	8
H7C3L0	H7C3L0	1	1	1	80984000	0	0		PLXNB3		1	1	1	1	1	0	0	1	0	0	1	0	0	5.1	5.1	5.1	18.993	175	175	1	3	0.0036084	2.236	5.1	0	0	281100000	81104000	0	0	1	0	0	3
H7C5F7;H0Y8A7;Q9NV92	H7C5F7;H0Y8A7;Q9NV92	1;1;1	1;1;1	1;1;1	0	98267000	0	NEDD4 family-interacting protein 2	NDFIP2	;;	3	1	1	1	1	1	1	1	1	1	1	1	1	9	9	9	16.76	156	156;233;336	1	17	0.0010098	2.7691	9	9	9	628920000	54631000	106380000	31657000	0	1	0	5
H7C5S6;Q9UFC0	H7C5S6;Q9UFC0	3;3	3;3	3;3	37770000	0	0	Leucine-rich repeat and WD repeat-containing protein 1	LRWD1	;	2	3	3	3	3	0	1	3	0	1	3	0	1	33.5	33.5	33.5	19.914	179	179;647	1	19	0	5.6392	33.5	0	7.8	276230000	40386000	0	13052000	1	0	0	5
I1E4Y6;Q6Y7W6-4;Q6Y7W6-5;Q6Y7W6;Q6Y7W6-3;E9PC50;C9JHW1;E7ESB6;C9JH18;F8WCD5;C9JPV7;C9JXQ0;C9J0V6;C9JHT0;C9JRZ2;C9J7G1;B8ZZD2	I1E4Y6;Q6Y7W6-4;Q6Y7W6-5;Q6Y7W6;Q6Y7W6-3;E9PC50;C9JHW1;E7ESB6	15;15;15;15;14;10;8;8;2;1;1;1;1;1;1;1;1	15;15;15;15;14;10;8;8;2;1;1;1;1;1;1;1;1	15;15;15;15;14;10;8;8;2;1;1;1;1;1;1;1;1	202930000	246910000	211650000	PERQ amino acid-rich with GYF domain-containing protein 2	GIGYF2	;;;;;;;	17	15	15	15	13	11	10	13	11	10	13	11	10	16.1	16.1	16.1	152.53	1321	1321;1286;1293;1299;1320;872;720;836;149;92;93;99;106;112;115;143;176	1	190	0	33.715	13.9	10.1	9.2	2897200000	196960000	223680000	180270000	8	5	4	62
I3L0N3;P46459;B4DFA2;I3L2G1;K7EQD6;I3L0L3;I3L338;I3L4Q9	I3L0N3;P46459;B4DFA2	27;27;25;7;6;5;2;2	27;27;25;7;6;5;2;2	27;27;25;7;6;5;2;2	448330000	416340000	381430000	Vesicle-fusing ATPase	NSF	;;	8	27	27	27	18	18	17	18	18	17	18	18	17	40.9	40.9	40.9	82.091	739	739;744;644;136;180;161;44;81	1	226	0	62.205	25.8	29.2	25.8	5299100000	429590000	395370000	357350000	9	7	5	79
I3L0U2;Q9Y6M0-3;Q9Y6M0-2;Q9Y6M0;I3L3C7	I3L0U2;Q9Y6M0-3;Q9Y6M0-2;Q9Y6M0;I3L3C7	4;4;4;4;3	4;4;4;4;3	4;4;4;4;3	81453000	81136000	63078000	Testisin	PRSS21	;;;;	5	4	4	4	3	3	3	3	3	3	3	3	3	20.2	20.2	20.2	24.706	218	218;300;312;314;256	1	36	0	7.3993	16.1	16.1	16.1	894660000	92093000	85509000	63654000	0	1	1	12
I3L1D4;B0QYY7;S4R469;F8VR27;F8VZY7;B0QYV1;B0QYY4;J3KNW3;B7Z1U7;F8VZG9;O43251-9;Q9NWB1-3;O43251-4;O43251-5;O43251-10;O43251-2;O43251;Q9NWB1-4;Q9NWB1-5;Q9NWB1;O43251-7;Q9NWB1-2;O43251-6;O43251-8;B0QYY6;S4R3K7;J3QQZ2;J3QRF4;F8VRS4;A6NFN3;B4DF29;O43251-3	I3L1D4;B0QYY7;S4R469;F8VR27;F8VZY7;B0QYV1;B0QYY4;J3KNW3;B7Z1U7;F8VZG9;O43251-9;Q9NWB1-3;O43251-4;O43251-5;O43251-10;O43251-2;O43251;Q9NWB1-4;Q9NWB1-5;Q9NWB1;O43251-7;Q9NWB1-2;O43251-6;O43251-8;B0QYY6;S4R3K7;J3QQZ2;J3QRF4;F8VRS4;A6NFN3;B4DF29;O43251-3	2;2;2;2;2;2;2;2;2;2;2;2;2;2;2;2;2;2;2;2;2;2;2;2;1;1;1;1;1;1;1;1	2;2;2;2;2;2;2;2;2;2;2;2;2;2;2;2;2;2;2;2;2;2;2;2;1;1;1;1;1;1;1;1	2;2;2;2;2;2;2;2;2;2;2;2;2;2;2;2;2;2;2;2;2;2;2;2;1;1;1;1;1;1;1;1	0	23083000	0	RNA binding protein fox-1 homolog;RNA binding protein fox-1 homolog 2;RNA binding protein fox-1 homolog 1;RNA binding protein fox-1 homolog 3	RBFOX1;RBFOX2;RBFOX3	;;;;;;;;;;;;;;;;;;;;;;;;;;;;;;;	32	2	2	2	1	2	2	1	2	2	1	2	2	12.7	12.7	12.7	20.66	189	189;200;234;262;263;357;370;402;425;466;367;370;370;376;380;381;390;392;395;397;400;418;450;451;128;230;328;358;391;312;325;358	1	20	0.0051753	1.9965	7.9	12.7	12.7	213860000	15676000	24693000	13293000	1	2	2	11
I3L1P8;Q02978;Q02978-2	I3L1P8;Q02978;Q02978-2	11;11;8	11;11;8	11;11;8	466050000	408210000	437860000	Mitochondrial 2-oxoglutarate/malate carrier protein	SLC25A11	;;	3	11	11	11	6	9	7	6	9	7	6	9	7	46.6	46.6	46.6	32.182	296	296;314;263	1	116	0	62.778	29.4	39.5	29.4	4955400000	426730000	457360000	224180000	5	9	5	74
I3L1R7;Q99447;Q99447-3;I3L3V9;I3L2Q1;I3L1L9;Q99447-2;Q99447-4;I3L102	I3L1R7;Q99447;Q99447-3;I3L3V9;I3L2Q1;I3L1L9;Q99447-2;Q99447-4	4;4;4;3;3;3;3;3;1	4;4;4;3;3;3;3;3;1	4;4;4;3;3;3;3;3;1	38876000	42800000	36128000	Ethanolamine-phosphate cytidylyltransferase	PCYT2	;;;;;;;	9	4	4	4	3	3	3	3	3	3	3	3	3	12.5	12.5	12.5	41.395	367	367;389;407;207;286;314;311;357;44	1	36	0	7.5587	8.4	8.7	8.7	504820000	41854000	42804000	24524000	1	0	1	14
I3L2C7;P57678;I3L399;E7EN12;I3L4M4;I3L4A4	I3L2C7;P57678	12;12;2;1;1;1	12;12;2;1;1;1	12;12;2;1;1;1	125360000	105360000	63476000	Gem-associated protein 4	GEMIN4	;	6	12	12	12	5	5	6	5	5	6	5	5	6	15.1	15.1	15.1	118.82	1047	1047;1058;296;184;189;271	1	81	0	13.813	7.2	6.3	8	1065300000	96263000	68849000	102130000	2	2	0	30
I3L2X1;Q9BYC9;B7Z746	I3L2X1;Q9BYC9;B7Z746	1;1;1	1;1;1	1;1;1	56054000	0	46668000	39S ribosomal protein L20, mitochondrial	MRPL20	;;	3	1	1	1	1	1	1	1	1	1	1	1	1	16.7	16.7	16.7	7.5961	66	66;149;155	1	20	0.004066	2.1934	16.7	16.7	16.7	480990000	57512000	18846000	40719000	2	1	1	10
I3L3C4;I3L3U9;J3QSV6;O76021;I3L234	I3L3C4;I3L3U9;J3QSV6;O76021;I3L234	3;3;3;3;2	3;3;3;3;2	3;3;3;3;2	40324000	47486000	45409000	Ribosomal L1 domain-containing protein 1	RSL1D1	;;;;	5	3	3	3	2	2	2	2	2	2	2	2	2	20.9	20.9	20.9	18.535	158	158;296;430;490;98	1	25	0.00026759	3.5346	12.7	12.7	12.7	468660000	32911000	41954000	38349000	1	1	1	8
I3L3V4;I3L4Z6;I3L0K1;E7EQ34;O14653;O14653-2;I3NI02;I3L1K7;O14653-3	I3L3V4;I3L4Z6;I3L0K1;E7EQ34;O14653;O14653-2;I3NI02;I3L1K7;O14653-3	2;2;2;2;2;2;1;1;1	2;2;2;2;2;2;1;1;1	2;2;2;2;2;2;1;1;1	14790000	0	0	Golgi SNAP receptor complex member 2	GOSR2	;;;;;;;;	9	2	2	2	1	1	0	1	1	0	1	1	0	18.1	18.1	18.1	17.794	149	149;165;199;232;212;213;98;143;195	1	19	0	6.8955	10.7	10.7	0	143150000	14999000	6738800	0	1	0	0	9
I3L4N6;Q9UP95-5;Q9UP95-2;Q9UP95-6;Q9UP95;Q9UP95-7;Q9UP95-3;Q9UP95-4;B3KXX3;Q9UHW9-6;Q9UHW9-5;Q9UHW9-2;Q9H2X9-2;Q9UHW9-3;Q9H2X9;Q9UHW9-4;Q9UHW9;H0YMQ9;H0YKQ8	I3L4N6;Q9UP95-5;Q9UP95-2;Q9UP95-6;Q9UP95;Q9UP95-7;Q9UP95-3;Q9UP95-4	7;7;7;7;7;7;6;4;3;3;3;3;3;3;3;3;3;2;2	7;7;7;7;7;7;6;4;3;3;3;3;3;3;3;3;3;2;2	7;7;7;7;7;7;6;4;3;3;3;3;3;3;3;3;3;2;2	31545000	31529000	0	Solute carrier family 12 member 4	SLC12A4	;;;;;;;	19	7	7	7	5	4	1	5	4	1	5	4	1	7.3	7.3	7.3	115.05	1037	1037;1054;1068;1079;1085;1087;1011;780;962;1084;1091;1099;1116;1135;1139;1141;1150;906;942	1	33	0	9.1105	5.4	4.8	1.2	333640000	45527000	37140000	4977000	2	1	0	20
I3L533;I3L2R9;Q9NXR1-2;Q9NXR1;I3L2R3;I3L2T8;I3L522;J3QSD2;J3QRZ1;A6NIZ0;Q9GZM8-3;Q9GZM8;Q9GZM8-2	I3L533;I3L2R9;Q9NXR1-2;Q9NXR1;I3L2R3;I3L2T8;I3L522	3;3;3;3;2;2;2;1;1;1;1;1;1	3;3;3;3;2;2;2;1;1;1;1;1;1	3;3;3;3;2;2;2;1;1;1;1;1;1	0	23974000	0	Nuclear distribution protein nudE homolog 1	NDE1	;;;;;;	13	3	3	3	2	2	0	2	2	0	2	2	0	26.8	26.8	26.8	15.744	153	153;173;335;346;137;139;192;194;196;269;328;345;367	1	17	0	7.1072	14.4	20.3	0	168050000	25426000	22468000	0	1	2	0	12
J3KMX1;Q99567;I3L245	J3KMX1;Q99567	7;7;3	7;7;3	7;7;3	82552000	0	116080000	Nuclear pore complex protein Nup88	NUP88	;	3	7	7	7	5	3	6	5	3	6	5	3	6	16.1	16.1	16.1	78.77	696	696;741;153	1	60	0	17.226	12.1	5.6	12.6	985210000	98568000	50782000	95307000	2	0	3	16
J3KMX2;Q92925-3;Q92925-2;Q92925;J3QWB6;F8VW95;F8VZ70;F8VUB0;Q6STE5	J3KMX2;Q92925-3;Q92925-2;Q92925;J3QWB6	4;4;4;4;2;1;1;1;1	4;4;4;4;2;1;1;1;1	3;3;3;3;2;0;0;0;0	32873000	0	0	SWI/SNF-related matrix-associated actin-dependent regulator of chromatin subfamily D member 2	SMARCD2	;;;;	9	4	4	3	2	2	2	2	2	2	1	1	1	15.8	15.8	12.1	52.238	456	456;483;510;531;231;113;278;289;483	1	31	0	9.9725	8.1	8.1	8.1	375350000	33150000	6878800	29504000	0	1	1	15
J3KMY5;H0YIZ1;G3V3E8;E7EMS2;G3V3D1;P61916;G3V2V8;B4DQV7	J3KMY5;H0YIZ1;G3V3E8;E7EMS2;G3V3D1;P61916;G3V2V8;B4DQV7	5;5;5;5;5;5;4;4	5;5;5;5;5;5;4;4	5;5;5;5;5;5;4;4	347250000	410140000	423270000	Epididymal secretory protein E1	NPC2	;;;;;;;	8	5	5	5	5	5	4	5	5	4	5	5	4	43.2	43.2	43.2	16.23	148	148;173;174;201;221;151;122;125	1	86	0	59.045	43.2	43.2	38.5	4397700000	365170000	468560000	261360000	5	5	4	54
J3KMZ8;B4DT58;Q92785;E9PN04	J3KMZ8;B4DT58;Q92785;E9PN04	2;2;2;1	2;2;2;1	2;2;2;1	0	35398000	25952000	Zinc finger protein ubi-d4	DPF2	;;;	4	2	2	2	0	2	2	0	2	2	0	2	2	7.7	7.7	7.7	45.78	405	405;207;391;106	1	17	0	5.0534	0	7.7	7.7	230130000	0	31859000	29041000	0	2	0	7
J3KMZ9;P01130-3;P01130-4;P01130;P01130-2;P01130-6	J3KMZ9;P01130-3;P01130-4;P01130;P01130-2;P01130-6	13;13;13;13;12;12	13;13;13;13;12;12	1;1;1;1;1;1	486340000	493250000	454230000	Low-density lipoprotein receptor	LDLR	;;;;;	6	13	13	1	12	9	8	12	9	8	1	1	1	18.2	18.2	2.1	104.56	945	945;692;819;860;682;739	1	169	0	63.355	16.8	12.5	11	5659100000	595370000	456430000	441360000	10	6	6	85
J3KN16;Q5VYK3;R4GMY1;Q5VYK5;F6XAQ5;R4GMY3	J3KN16;Q5VYK3	39;39;17;5;5;2	39;39;17;5;5;2	39;39;17;5;5;2	657070000	651020000	636750000	Proteasome-associated protein ECM29 homolog	KIAA0368;ECM29	;	6	39	39	39	28	26	25	28	26	25	28	26	25	26.8	26.8	26.8	223.69	2017	2017;1845;890;129;142;128	1	347	0	114.94	18.4	17	16.3	8317300000	738750000	601600000	577930000	14	10	9	154
J3KN32;Q9UKL0;E9PQE5;B4DV59;Q9P2K3-2;Q9P2K3-4;Q9P2K3;Q9P2K3-3	J3KN32;Q9UKL0	3;3;1;1;1;1;1;1	3;3;1;1;1;1;1;1	3;3;1;1;1;1;1;1	32313000	29218000	0	REST corepressor 1	RCOR1	;	8	3	3	3	3	2	0	3	2	0	3	2	0	12.8	12.8	12.8	53.327	485	485;482;149;374;436;449;495;553	1	21	0	6.561	12.8	8.7	0	282620000	43245000	23220000	0	1	0	0	8
J3KN36;Q5JPE7-2;P69849;Q5JPE7;F5H826;Q5JPE7-3;H3BPS9;I3L0Q6;H3BTW1;I3L1G6	J3KN36;Q5JPE7-2;P69849;Q5JPE7;F5H826;Q5JPE7-3	37;37;37;37;33;33;5;2;2;1	37;37;37;37;33;33;5;2;2;1	3;3;3;3;3;3;1;0;0;1	1310700000	1392700000	1382100000	Nodal modulator 2;Nodal modulator 3	NOMO3;NOMO2	;;;;;	10	37	37	3	28	27	26	28	27	26	1	1	2	41.4	41.4	3.1	139.38	1267	1267;1222;1222;1267;1100;1100;223;138;138;95	1	445	0	236.24	32.8	30.9	29.9	16301000000	1396700000	1276200000	1214400000	26	27	20	288
J3KN66;Q5JTV8;H0Y4R4;Q5JTV8-2;H0YD16;H0YDU3	J3KN66;Q5JTV8;H0Y4R4	14;13;8;5;4;3	14;13;8;5;4;3	13;12;7;4;4;3	564160000	600580000	512440000	Torsin-1A-interacting protein 1	TOR1AIP1	;;	6	14	14	13	9	11	12	9	11	12	8	10	11	30.9	30.9	29.2	67.821	599	599;583;296;378;198;193	1	165	0	109.41	20	24.4	25.4	6796800000	506800000	574190000	450820000	5	7	9	94
J3KN67;H0YLS7;D6RGJ6	J3KN67	22;1;1	1;1;1	0;0;0	649230000	389940000	471050000		TPM3		3	22	1	0	21	21	21	1	1	1	0	0	0	53.3	3.2	0	33.222	285	285;40;75	1	33	1	-2	50.9	50.9	50.9	6580300000	708020000	439010000	516650000	1	1	1	12
J3KN69;Q6PIU2;Q6PIU2-2;H7C046;Q6PIU2-3;F8WE33	J3KN69;Q6PIU2;Q6PIU2-2;H7C046;Q6PIU2-3	8;8;8;6;5;1	8;8;8;6;5;1	8;8;8;6;5;1	338790000	344960000	341760000	Neutral cholesterol ester hydrolase 1	NCEH1	;;;;	6	8	8	8	7	7	7	7	7	7	7	7	7	24.8	24.8	24.8	49.062	440	440;408;416;307;275;93	1	110	0	55.573	23.2	21.1	23.2	4091200000	357800000	334410000	337300000	7	6	4	68
J3KN82;Q96GX9;S4R3D6;Q96GX9-3	J3KN82;Q96GX9;S4R3D6;Q96GX9-3	4;4;3;3	4;4;3;3	4;4;3;3	108960000	87688000	108850000	Methylthioribulose-1-phosphate dehydratase	APIP	;;;	4	4	4	4	4	3	3	4	3	3	4	3	3	20.8	20.8	20.8	29.3	259	259;242;195;204	1	54	0	23.887	20.8	14.3	16.2	1277700000	120890000	90802000	44023000	2	3	2	38
J3KNC0;P52655	J3KNC0;P52655	2;2	2;2	2;2	32343000	0	0	Transcription initiation factor IIA subunit 1;Transcription initiation factor IIA alpha chain;Transcription initiation factor IIA beta chain	GTF2A1	;	2	2	2	2	2	1	1	2	1	1	2	1	1	47.5	47.5	47.5	6.7407	59	59;376	1	17	0	11.398	47.5	18.6	18.6	335850000	34463000	0	20255000	1	1	0	11
J3KNF4;O14618;E9PP76;E9PK03	J3KNF4;O14618;E9PP76	3;3;2;1	3;3;2;1	3;3;2;1	54851000	17690000	22567000	Copper chaperone for superoxide dismutase;Superoxide dismutase [Cu-Zn]	CCS	;;	4	3	3	3	2	2	2	2	2	2	2	2	2	9	9	9	27.086	255	255;274;68;249	1	25	0.0026882	2.419	6.3	6.3	6.3	309190000	35724000	17446000	18065000	2	0	0	8
J3KNF8;J3QR91	J3KNF8	5;1	5;1	1;0	1793900000	1589800000	2031000000		CYB5B		2	5	5	1	5	5	5	5	5	5	1	1	1	59.3	59.3	10	16.694	150	150;64	1	125	0	133.12	59.3	59.3	59.3	21668000000	1800600000	1573700000	1967600000	7	10	10	116
J3KNK7;H3BND4;E7EMH5;E7EPL4;H3BNZ1;Q6P996;Q86XE2;Q6P996-2;H3BNL6;Q6P474	J3KNK7;H3BND4;E7EMH5;E7EPL4;H3BNZ1;Q6P996	18;18;18;18;18;18;6;5;2;2	18;18;18;18;18;18;6;5;2;2	18;18;18;18;18;18;6;5;2;2	478990000	419270000	441050000	Pyridoxal-dependent decarboxylase domain-containing protein 1	PDXDC1	;;;;;	10	18	18	18	13	16	12	13	16	12	13	16	12	35.4	35.4	35.4	85.12	773	773;806;697;760;761;788;498;429;271;469	1	196	0	64.331	22.9	31.3	21.1	5313700000	425980000	487770000	374690000	6	9	7	84
J3KNL6;O15027;O15027-5;O15027-2;O15027-4;O15027-3;X6RGP5;Q8N9G1	J3KNL6;O15027;O15027-5;O15027-2;O15027-4;O15027-3;X6RGP5	30;27;27;26;26;26;17;3	30;27;27;26;26;26;17;3	30;27;27;26;26;26;17;3	547540000	544590000	549770000	Protein transport protein Sec16A	SEC16A	;;;;;;	8	30	30	30	18	18	23	18	18	23	18	18	23	21.6	21.6	21.6	251.89	2357	2357;2179;2201;2134;2154;2159;1059;385	1	263	0	56.883	10.7	11.5	14.4	6507800000	417510000	401530000	649620000	7	11	11	109
J3KNQ4;Q9NVD7;F5H1R9;B7Z952;E9PS97;Q9NVD7-2	J3KNQ4;Q9NVD7;F5H1R9;B7Z952;E9PS97	9;9;8;6;5;2	9;9;8;6;5;2	7;7;6;5;5;2	284110000	267140000	286660000	Alpha-parvin	PARVA	;;;;	6	9	9	7	8	8	7	8	8	7	6	6	6	27.7	27.7	22.6	46.589	412	412;372;372;290;209;182	1	107	0	55.23	24.3	24.3	22.3	3273900000	296220000	256370000	262410000	6	4	4	63
J3KNW4;Q14192	J3KNW4;Q14192	9;9	9;9	9;9	201910000	220810000	199840000	Four and a half LIM domains protein 2	FHL2	;	2	9	9	9	9	8	5	9	8	5	9	8	5	26.5	26.5	26.5	44.205	389	389;279	1	100	0	21.513	26.5	24.4	16.5	2793800000	240160000	247770000	156160000	6	3	3	55
J3KNX9;Q92614-2;Q92614-3;Q92614-4;Q92614;Q92614-5;H0YEV9	J3KNX9;Q92614-2;Q92614-3;Q92614-4;Q92614;Q92614-5	10;10;10;10;10;8;2	10;10;10;10;10;8;2	10;10;10;10;10;8;2	65004000	50437000	66552000	Unconventional myosin-XVIIIa	MYO18A	;;;;;	7	10	10	10	7	6	4	7	6	4	7	6	4	6.5	6.5	6.5	233.14	2054	2054;1723;2002;2039;2054;1581;197	1	65	0	15.719	5	4	2.2	711300000	64773000	54754000	45056000	1	2	0	12
J3KP15;Q01130;J3QL05;B4DN89;Q9BRL6-2;Q9BRL6	J3KP15;Q01130;J3QL05;B4DN89	7;7;6;6;2;2	7;7;6;6;2;2	7;7;6;6;2;2	1500400000	1671600000	1497500000	Serine/arginine-rich splicing factor 2	SRSF2	;;;	6	7	7	7	7	7	6	7	7	6	7	7	6	55.6	55.6	55.6	15.371	133	133;221;130;209;275;282	1	138	0	210.16	55.6	55.6	50.4	19354000000	1597900000	1554800000	1239900000	8	7	7	90
J3KPN1;Q96BS2;Q96BS2-3;Q96BS2-2;E9PQ58;H0YIX4	J3KPN1;Q96BS2;Q96BS2-3;Q96BS2-2	7;7;6;5;3;1	7;7;6;5;3;1	7;7;6;5;3;1	204650000	160420000	197350000	Calcineurin B homologous protein 3	TESC	;;;	6	7	7	7	6	5	6	6	5	6	6	5	6	30	30	30	30.289	267	267;214;187;163;135;81	1	76	0	24.602	25.1	21.3	25.1	2491500000	249520000	144020000	220210000	2	2	4	44
J3KPP4;O95232;B4DJ96;D6RDI2;C9JL41;O95232-2;E7EN55;H0YA81;D6RHH0;H7C5U7;U3KQT3;H0YBV7;H0YAR4	J3KPP4;O95232;B4DJ96;D6RDI2	14;14;10;7;3;3;2;2;1;1;1;1;1	14;14;10;7;3;3;2;2;1;1;1;1;1	14;14;10;7;3;3;2;2;1;1;1;1;1	274940000	364060000	317620000	Luc7-like protein 3	LUC7L3	;;;	13	14	14	14	12	6	7	12	6	7	12	6	7	31.7	31.7	31.7	58.22	489	489;432;356;184;79;79;54;207;36;39;46;118;123	1	129	0	111.23	27.4	14.5	16.8	3847500000	404730000	188610000	209370000	5	2	3	62
J3KPS0;Q9NXW2;Q9NXW2-2;V9GYN7	J3KPS0;Q9NXW2;Q9NXW2-2	4;4;4;1	4;4;4;1	4;4;4;1	53081000	0	58266000	DnaJ homolog subfamily B member 12	DNAJB12	;;	4	4	4	4	4	3	2	4	3	2	4	3	2	13.9	13.9	13.9	45.489	409	409;375;377;276	1	36	0	5.289	13.9	11.2	9.5	600350000	64572000	54279000	40281000	2	0	0	4
J3KPT4;Q9H4I3;Q9H4I3-2	J3KPT4;Q9H4I3;Q9H4I3-2	4;4;2	4;4;2	4;4;2	34894000	0	0	TraB domain-containing protein	TRABD	;;	3	4	4	4	3	1	2	3	1	2	3	1	2	16.4	16.4	16.4	42.692	379	379;376;330	1	20	0	4.2046	14	3.2	5.5	393630000	42263000	25560000	41920000	0	0	0	7
J3KPX7;Q99623;F5GY37;Q99623-2;F5GWA7;F5H3X6;F5H0C5;F5H2D2;U3KPZ5	J3KPX7;Q99623;F5GY37;Q99623-2;F5GWA7;F5H3X6	16;16;14;13;10;8;4;3;3	16;16;14;13;10;8;4;3;3	16;16;14;13;10;8;4;3;3	3835500000	3728400000	3740000000	Prohibitin-2	PHB2	;;;;;	9	16	16	16	15	15	15	15	15	15	15	15	15	59.9	59.9	59.9	33.402	299	299;299;267;261;261;213;112;87;103	1	244	0	323.31	57.5	56.9	54.5	43872000000	3966300000	3457700000	3364900000	17	17	13	179
J3KQ12;Q96G97;Q96G97-4;F8W7Q8;Q96G97-3;H0YF20;H7BYY0;H7C2D5;E9PIU3;H7BXM1	J3KQ12;Q96G97;Q96G97-4;F8W7Q8;Q96G97-3	3;3;3;2;2;1;1;1;1;1	3;3;3;2;2;1;1;1;1;1	3;3;3;2;2;1;1;1;1;1	0	0	18915000	Seipin	BSCL2	;;;;	10	3	3	3	2	2	3	2	2	3	2	2	3	5.6	5.6	5.6	51.286	464	464;398;462;223;287;52;79;150;226;277	1	20	0.00026062	3.2105	3.9	3.9	5.6	211770000	21612000	28246000	22161000	0	0	1	5
J3KQ32;Q9NTK5;Q9NTK5-3;Q9NTK5-2;C9JTK6;C9JCJ9	J3KQ32;Q9NTK5;Q9NTK5-3;Q9NTK5-2	24;24;16;14;7;6	24;24;16;14;7;6	24;24;16;14;7;6	1617700000	1691200000	1635800000	Obg-like ATPase 1	OLA1	;;;	6	24	24	24	20	18	19	20	18	19	20	18	19	65.6	65.6	65.6	46.937	416	416;396;278;238;116;103	1	295	0	69.965	59.4	53.8	54.8	20547000000	1616600000	1382100000	1400300000	16	14	11	158
J3KQ34;Q9H9Q2;J3QT73;Q9H9Q2-2;J3KQ41;Q9H9Q2-3	J3KQ34;Q9H9Q2;J3QT73;Q9H9Q2-2	3;3;2;2;1;1	3;3;2;2;1;1	3;3;2;2;1;1	0	40819000	28107000	COP9 signalosome complex subunit 7b	COPS7B	;;;	6	3	3	3	1	2	2	1	2	2	1	2	2	18.7	18.7	18.7	26.424	230	230;264;172;157;278;273	1	25	0	15.383	5.7	11.3	13	497490000	25460000	38734000	13184000	1	2	0	13
J3KQ48;Q9Y3E5	J3KQ48;Q9Y3E5	5;5	5;5	5;5	210630000	206410000	250040000	Peptidyl-tRNA hydrolase 2, mitochondrial	PTRH2	;	2	5	5	5	5	5	5	5	5	5	5	5	5	47.2	47.2	47.2	19.325	180	180;179	1	92	0	57.381	47.2	47.2	47.2	2799000000	235600000	215650000	250830000	5	5	6	57
J3KQ73;Q14318;U3KQ64;Q14318-3;U3KQI1;M0R1Q0;M0R1S6	J3KQ73;Q14318;U3KQ64	10;9;5;4;2;1;1	10;9;5;4;2;1;1	1;0;0;0;0;0;0	313030000	341190000	286270000	Peptidyl-prolyl cis-trans isomerase FKBP8	FKBP8	;;	7	10	10	1	8	7	7	8	7	7	0	0	0	27.4	27.4	1.6	47.143	441	441;412;182;253;103;163;167	1	107	0	78.391	22.2	19.7	18.4	3898000000	247200000	338940000	278850000	2	2	4	60
J3KQJ1;Q8NBJ7;C9JL30;A8MXB9;C9J660;Q8NBJ7-2;E9PBT8;H7C3B2;F8WA42;Q8NBJ7-3;J3QT17;Q8NBJ7-5;F8WEX5;E9PG02;F8WEV7;F8WES7;Q8NBJ7-4	J3KQJ1;Q8NBJ7;C9JL30;A8MXB9;C9J660;Q8NBJ7-2;E9PBT8;H7C3B2;F8WA42;Q8NBJ7-3;J3QT17;Q8NBJ7-5	6;6;5;5;5;5;4;4;4;4;3;3;2;2;1;1;1	6;6;5;5;5;5;4;4;4;4;3;3;2;2;1;1;1	6;6;5;5;5;5;4;4;4;4;3;3;2;2;1;1;1	207070000	209110000	212000000	Sulfatase-modifying factor 2	SUMF2	;;;;;;;;;;;	17	6	6	6	6	4	4	6	4	4	6	4	4	20	20	20	35.922	320	320;301;293;305;352;213;232;304;358;339;236;217;165;183;102;150;321	1	80	0	34.508	20	16.2	16.6	2914200000	271940000	142350000	148070000	6	2	2	40
J3KQS6;Q9NWV8;M0QX07;M0R3F4;M0R2A4;M0R2K3;M0R193;M0R0I0;M0R2I2;M0QY17;Q9NWV8-3;M0QXG9;Q9NWV8-2	J3KQS6;Q9NWV8;M0QX07;M0R3F4;M0R2A4;M0R2K3;M0R193;M0R0I0;M0R2I2	5;5;4;3;3;3;3;3;3;2;2;1;1	5;5;4;3;3;3;3;3;3;2;2;1;1	5;5;4;3;3;3;3;3;3;2;2;1;1	60975000	66067000	66543000	BRISC and BRCA1-A complex member 1	BABAM1	;;;;;;;;	13	5	5	5	5	5	4	5	5	4	5	5	4	23.7	23.7	23.7	36.426	329	329;329;254;181;193;200;218;225;237;108;171;184;184	1	52	0	20.847	23.7	23.7	20.1	820260000	69795000	71802000	55124000	1	2	2	23
J3KQU9;B3KXW5;O43747;O43747-2;H3BNR4;H3BR36;H3BUN9;H3BRM7;H3BN71;B4DGE1;B3KNW1;H3BN75;H3BS13;H3BV30	J3KQU9;B3KXW5;O43747;O43747-2	17;17;17;17;7;5;5;3;3;3;2;1;1;1	17;17;17;17;7;5;5;3;3;3;2;1;1;1	17;17;17;17;7;5;5;3;3;3;2;1;1;1	512350000	492390000	496490000	AP-1 complex subunit gamma-1	AP1G1	;;;	14	17	17	17	16	16	15	16	16	15	16	16	15	27.8	27.8	27.8	91.695	825	825;845;822;825;236;187;208;139;144;176;247;53;85;91	1	234	0	115.47	26.2	26.2	25.3	6243700000	504710000	513930000	467340000	12	11	8	126
J3KQV0;P38936	J3KQV0;P38936	2;2	2;2	2;2	55250000	0	0	Cyclin-dependent kinase inhibitor 1	CDKN1A	;	2	2	2	2	2	0	1	2	0	1	2	0	1	20.7	20.7	20.7	21.954	198	198;164	1	5	0.0080589	1.7879	20.7	0	6.1	83556000	55332000	0	11579000	1	0	0	1
J3KR97;Q9BTW9;Q9BTW9-4;Q9BTW9-5;I3L439;I3L163;C9J1U4;I3L4D2;I3L3H4;I3L131;I3L143;I3L0V3;I3L500;Q9BTW9-3;I3L1S3;I3L120	J3KR97;Q9BTW9;Q9BTW9-4;Q9BTW9-5	14;14;14;8;5;4;4;3;3;3;3;3;3;3;2;2	14;14;14;8;5;4;4;3;3;3;3;3;3;3;2;2	14;14;14;8;5;4;4;3;3;3;3;3;3;3;2;2	151200000	143710000	179050000	Tubulin-specific chaperone D	TBCD	;;;	16	14	14	14	10	8	8	10	8	8	10	8	8	15.6	15.6	15.6	136.55	1230	1230;1192;1248;757;256;244;311;109;134;141;211;237;251;151;117;260	1	124	0	38.056	10.9	8.5	8.7	1962700000	175250000	132610000	147110000	3	2	2	48
J3KS15;Q14197	J3KS15;Q14197	3;3	3;3	3;3	73553000	81450000	71486000	Peptidyl-tRNA hydrolase ICT1, mitochondrial	ICT1	;	2	3	3	3	3	3	3	3	3	3	3	3	3	18.2	18.2	18.2	21.905	192	192;206	1	34	0	15.391	18.2	18.2	18.2	881820000	84558000	55320000	95727000	2	3	0	16
J3KSY6;Q8TCD5;J3KSX6;J3KRC4;J3KSF0;J3QQX8;Q8TCD5-2	J3KSY6;Q8TCD5;J3KSX6;J3KRC4	3;3;2;2;1;1;1	3;3;2;2;1;1;1	3;3;2;2;1;1;1	71496000	69722000	78866000	5(3)-deoxyribonucleotidase, cytosolic type	NT5C	;;;	7	3	3	3	2	2	3	2	2	3	2	2	3	26.1	26.1	26.1	13.618	115	115;201;153;182;39;87;117	1	31	0.00027027	3.6882	18.3	18.3	26.1	698860000	31998000	26430000	106180000	0	0	2	8
J3KTA4;P17844;B4DLW8;J3KRZ1;J3QSF1;J3QRQ7;J3KRX8;J3QR02;J3QRN5;X6RLV5;J3QLG9;J3QR62	J3KTA4;P17844;B4DLW8	31;31;28;12;11;10;5;4;2;2;1;1	30;30;27;11;10;10;5;4;2;2;1;1	22;22;19;5;6;8;5;4;2;2;1;1	3921900000	4134400000	4051000000	Probable ATP-dependent RNA helicase DDX5	DDX5	;;	12	31	30	22	24	28	28	23	27	27	16	19	19	59.6	57.8	45.6	69.086	614	614;614;535;166;153;212;120;99;65;96;46;52	1	447	0	231.68	45.9	54.4	50.5	48982000000	4179600000	3490000000	3909200000	21	26	25	318
J3KTD2;C9JTR3;Q86VV8-2;Q86VV8-4;Q86VV8-3;Q86VV8	J3KTD2;C9JTR3;Q86VV8-2;Q86VV8-4;Q86VV8-3;Q86VV8	2;1;1;1;1;1	2;1;1;1;1;1	2;1;1;1;1;1	580470000	630120000	608570000	Rotatin	RTTN	;;;;;	6	2	2	2	2	2	2	2	2	2	2	2	2	3	3	3	56.318	500	500;1593;601;879;2200;2226	1	35	0.0065314	1.934	3	3	3	7417300000	559610000	642740000	571360000	1	1	1	12
J3KTL2;Q07955;Q07955-3;Q07955-2;J3KSR8;J3QQV5;J3KSW7	J3KTL2;Q07955;Q07955-3;Q07955-2	15;15;14;14;6;5;5	15;15;14;14;6;5;5	14;14;13;13;6;5;5	1350700000	1339400000	1293900000	Serine/arginine-rich splicing factor 1	SRSF1	;;;	7	15	15	14	15	13	14	15	13	14	14	13	13	49.8	49.8	47	28.329	253	253;248;201;292;143;65;73	1	227	0	70.516	49.8	46.2	49	16211000000	1539400000	1106300000	1326600000	19	12	16	201
J3KTL7;Q5QPR4;J3QR29;Q5QPR3;J3QKR5;J3QR44;P21127-6;P21127-9;Q9UQ88-4;P21127-8;Q9UQ88-3;Q9UQ88-2;P21127-3;P21127-2;Q9UQ88;P21127;J3QL65;Q9UQ88-10;P21127-12;P21127-4;P21127-5;P21127-10;Q9UQ88-5;Q9UQ88-9;X6R529;E9PFJ2;G8JLH1;J3KS35;E7ESP2	J3KTL7;Q5QPR4;J3QR29;Q5QPR3;J3QKR5;J3QR44;P21127-6;P21127-9;Q9UQ88-4;P21127-8;Q9UQ88-3;Q9UQ88-2;P21127-3;P21127-2;Q9UQ88;P21127;J3QL65;Q9UQ88-10;P21127-12;P21127-4;P21127-5;P21127-10;Q9UQ88-5;Q9UQ88-9	12;12;12;12;12;12;12;12;12;12;12;12;12;12;12;12;11;11;11;11;11;11;10;7;1;1;1;1;1	12;12;12;12;12;12;12;12;12;12;12;12;12;12;12;12;11;11;11;11;11;11;10;7;1;1;1;1;1	9;9;9;9;9;9;9;9;9;9;9;9;9;9;9;9;8;8;8;8;8;8;7;7;1;1;1;1;1	270540000	197790000	268450000	Cyclin-dependent kinase 11B;Cyclin-dependent kinase 11A	CDC2L1;CDK11A;CDK11B	;;;;;;;;;;;;;;;;;;;;;;;	29	12	12	9	4	9	8	4	9	8	4	6	6	19	19	12.5	85.243	738	738;746;772;779;783;785;738;748;770;772;779;780;781;782;783;795;618;439;439;461;526;565;397;531;75;151;232;407;420	1	117	0	27.184	5.8	14.6	12.6	2921700000	159540000	214930000	237770000	2	2	7	42
J3QK89;Q8IWX8	J3QK89;Q8IWX8	4;4	4;4	4;4	113090000	97996000	117360000	Calcium homeostasis endoplasmic reticulum protein	CHERP	;	2	4	4	4	4	4	4	4	4	4	4	4	4	5.8	5.8	5.8	104.93	927	927;916	1	67	0	17.126	5.8	5.8	5.8	1423600000	100290000	118580000	94422000	2	1	2	20
J3QK90;Q9UNZ2;Q9UNZ2-5;Q9UNZ2-4;F2Z2K0;Q9UNZ2-6;R4GNE6;G3V4V8;R4GMY2	J3QK90;Q9UNZ2;Q9UNZ2-5;Q9UNZ2-4;F2Z2K0;Q9UNZ2-6	16;16;16;15;11;11;3;1;1	16;16;16;15;11;11;3;1;1	16;16;16;15;11;11;3;1;1	420810000	387370000	412910000	NSFL1 cofactor p47	NSFL1C	;;;;;	9	16	16	16	13	11	13	13	11	13	13	11	13	58.9	58.9	58.9	40.844	372	372;370;372;339;274;259;105;35;71	1	162	0	78.737	47.6	44.4	49.2	5065500000	472940000	353500000	416710000	6	4	10	79
J3QL71;Q96FV2-2;Q96FV2;J3QQM9;J3QRJ1	J3QL71;Q96FV2-2;Q96FV2;J3QQM9	3;3;3;2;1	3;3;3;2;1	3;3;3;2;1	46608000	0	40072000	Secernin-2	SCRN2	;;;	5	3	3	3	3	2	3	3	2	3	3	2	3	12.9	12.9	12.9	47.493	433	433;378;425;269;271	1	21	0	9.3319	12.9	6.2	12.9	364640000	60921000	28276000	45724000	1	0	1	11
J3QLD9;E7EMK3;Q14254;K7EKW9	J3QLD9;E7EMK3;Q14254;K7EKW9	7;7;7;5	7;7;7;5	7;7;7;5	99736000	120410000	100650000	Flotillin-2	FLOT2	;;;	4	7	7	7	5	5	5	5	5	5	5	5	5	16.1	16.1	16.1	47.142	428	428;483;428;249	1	60	0	13.524	11.7	12.1	11	1232100000	131270000	106850000	96842000	3	5	2	27
J3QLE5;P14678-2;P63162;P14678;B3KVR1;P14678-3;J3KRY3;S4R3P3	J3QLE5;P14678-2;P63162;P14678;B3KVR1;P14678-3;J3KRY3;S4R3P3	8;8;8;8;8;8;5;5	8;8;8;8;8;8;5;5	8;8;8;8;8;8;5;5	1233800000	1186700000	1032400000	Small nuclear ribonucleoprotein-associated proteins B and B;Small nuclear ribonucleoprotein-associated protein N	SNRPN;SNRPB	;;;;;;;	8	8	8	8	8	7	7	8	7	7	8	7	7	35.5	35.5	35.5	17.546	169	169;231;240;240;244;289;59;70	1	163	0	52.125	35.5	34.9	35.5	14818000000	1252400000	1193800000	985330000	11	8	8	109
J3QLR8;Q9Y3D9	J3QLR8;Q9Y3D9	5;5	5;5	5;5	0	68015000	0	28S ribosomal protein S23, mitochondrial	MRPS23	;	2	5	5	5	2	4	3	2	4	3	2	4	3	33.6	33.6	33.6	17.517	152	152;190	1	40	0	5.9897	15.1	23	23.7	679970000	23966000	63104000	50704000	0	0	0	7
J3QQ67;Q07020;G3V203;H0YHA7;Q07020-2;F8VYV2;F8VUA6;F8VXR6	J3QQ67;Q07020;G3V203;H0YHA7;Q07020-2;F8VYV2;F8VUA6	9;9;8;8;8;7;6;1	9;9;8;8;8;7;6;1	9;9;8;8;8;7;6;1	4186600000	4096700000	3886300000	60S ribosomal protein L18	RPL18	;;;;;;	8	9	9	9	9	6	9	9	6	9	9	6	9	42.1	42.1	42.1	21.728	190	190;188;164;167;159;133;130;84	1	171	0	76.999	42.1	32.6	42.1	49372000000	4809600000	3581100000	3734100000	11	6	6	93
J3QQS1;J3QLS3;Q9Y2R9;J3KSI8;J3QKW2	J3QQS1;J3QLS3;Q9Y2R9;J3KSI8;J3QKW2	4;4;4;3;3	4;4;4;3;3	4;4;4;3;3	0	36548000	0	28S ribosomal protein S7, mitochondrial	MRPS7	;;;;	5	4	4	4	2	2	2	2	2	2	2	2	2	29.1	29.1	29.1	19.903	172	172;271;242;156;183	1	25	0	5.7753	15.1	14.5	15.7	371820000	30843000	31747000	23651000	0	1	0	6
J3QQT2;J3KRX5;P18621;P18621-3;J3QLC8;P18621-2;J3QS96;J3KRB3;J3KSJ0	J3QQT2;J3KRX5;P18621;P18621-3;J3QLC8;P18621-2;J3QS96;J3KRB3	8;8;8;8;7;7;6;5;1	8;8;8;8;7;7;6;5;1	8;8;8;8;7;7;6;5;1	3035600000	2695000000	2602800000	60S ribosomal protein L17	RPL17	;;;;;;;	9	8	8	8	6	8	8	6	8	8	6	8	8	50.3	50.3	50.3	19.786	171	171;174;184;228;174;146;138;105;56	1	154	0	87.92	33.9	50.3	50.3	30859000000	3062100000	2672100000	2302900000	10	8	10	117
J3QR09;J3KTE4;P84098;J3QL15	J3QR09;J3KTE4;P84098	9;9;9;4	9;9;9;4	9;9;9;4	2830500000	2535200000	3181300000	Ribosomal protein L19;60S ribosomal protein L19	RPL19	;;	4	9	9	9	9	8	9	9	8	9	9	8	9	35.8	35.8	35.8	23.134	193	193;194;196;128	1	182	0	77.329	35.8	35.2	35.8	36388000000	2897300000	2529800000	3070100000	11	10	7	129
J3QRG6;P42771;P42771-4;K7ES20;G3XAG3;K7ENC6;P42771-2;P42771-3;P42772	J3QRG6;P42771;P42771-4;K7ES20;G3XAG3;K7ENC6;P42771-2;P42771-3	6;6;6;3;3;3;3;3;2	6;6;6;3;3;3;3;3;2	6;6;6;3;3;3;3;3;2	984970000	1148000000	891020000	Cyclin-dependent kinase inhibitor 2A	CDKN2A	;;;;;;;	9	6	6	6	6	5	5	6	5	5	6	5	5	66.7	66.7	66.7	14.968	138	138;156;167;104;116;121;105;116;138	1	113	0	53.887	66.7	50.7	61.6	13039000000	1012900000	1069700000	853620000	7	5	5	71
J3QRS3;P19105;O14950;J3KTJ1	J3QRS3;P19105;O14950;J3KTJ1	8;8;8;4	8;8;8;4	3;3;3;0	1132000000	1207800000	1311400000	Myosin regulatory light chain 12A;Myosin regulatory light chain 12B	MYL12A;MYL12B	;;;	4	8	8	3	7	7	6	7	7	6	3	3	3	60.5	60.5	23.2	20.457	177	177;171;172;114	1	147	0	247.5	55.4	55.4	49.2	14219000000	1115100000	1235900000	1262400000	12	13	11	133
J3QRS9;X6R4W8;O43670-2;O43670;O43670-4;O43670-3;J3KS31;J3QS27;J3KTL1;J3KRB6;J3KRW6;H0Y3M2	J3QRS9;X6R4W8;O43670-2;O43670;O43670-4;O43670-3;J3KS31	5;5;5;5;5;4;3;1;1;1;1;1	5;5;5;5;5;4;3;1;1;1;1;1	5;5;5;5;5;4;3;1;1;1;1;1	416610000	332920000	363010000	BUB3-interacting and GLEBS motif-containing protein ZNF207	ZNF207	;;;;;;	12	5	5	5	4	4	5	4	4	5	4	4	5	10.8	10.8	10.8	52.541	493	493;497;463;478;494;395;341;46;74;93;95;198	1	53	0	17.753	9.1	9.1	10.8	4756600000	423070000	350880000	460790000	4	1	5	41
J3QRU4;F8WCA0;L7N2F9;P63027	J3QRU4;F8WCA0;L7N2F9;P63027	4;4;4;4	2;2;2;2	1;1;1;1	42838000	36907000	40853000	Vesicle-associated membrane protein 2	VAMP2	;;;	4	4	2	1	3	3	3	1	1	1	1	1	1	61.1	39.8	14.2	12.251	113	113;118;121;116	1	23	0.00026178	3.261	35.4	35.4	35.4	421520000	44580000	34348000	38674000	2	1	1	16
J3QRZ2;J3QLB7;J3QKS6;J3QRG5;J3KSJ5;Q9BQA9-2;Q9BQA9;J3QKZ6;J3KTI1;J3KSB6;J3KS78;J3QS53;J3KTF4	J3QRZ2;J3QLB7;J3QKS6;J3QRG5;J3KSJ5;Q9BQA9-2;Q9BQA9;J3QKZ6;J3KTI1;J3KSB6;J3KS78;J3QS53;J3KTF4	2;2;2;2;2;2;2;1;1;1;1;1;1	2;2;2;2;2;2;2;1;1;1;1;1;1	2;2;2;2;2;2;2;1;1;1;1;1;1	0	0	40201000	Uncharacterized protein C17orf62	C17orf62	;;;;;;;;;;;;	13	2	2	2	1	1	2	1	1	2	1	1	2	18.8	18.8	18.8	13.235	117	117;119;130;148;190;173;187;51;78;78;80;85;88	1	25	0	4.0213	12	12	18.8	425030000	48235000	22724000	28457000	1	1	1	11
J3QS48;I3L295;J3KTK8;J3QQZ4;J3KT75;J3QW43;J3QRD5;B4DT74;O75352;I3L405;I3L261;I3L1D2;J3KSI4;I3L4E0	J3QS48;I3L295;J3KTK8;J3QQZ4;J3KT75;J3QW43;J3QRD5;B4DT74;O75352;I3L405;I3L261;I3L1D2	3;3;3;3;3;3;3;3;3;2;2;2;1;1	3;3;3;3;3;3;3;3;3;2;2;2;1;1	3;3;3;3;3;3;3;3;3;2;2;2;1;1	89455000	0	127970000	Mannose-P-dolichol utilization defect 1 protein	MPDU1	;;;;;;;;;;;	14	3	3	3	3	1	3	3	1	3	3	1	3	41.6	41.6	41.6	10.978	101	101;109;116;152;154;192;193;186;247;54;61;61;52;75	1	35	0	6.4381	41.6	9.9	41.6	1200700000	94614000	59847000	113030000	0	0	0	8
J3QTA2;Q99933-4;Q99933-3;Q99933;Q99933-2;C9JYK5;F1LLU6	J3QTA2;Q99933-4;Q99933-3;Q99933;Q99933-2	8;8;8;8;7;3;1	8;8;8;8;7;3;1	8;8;8;8;7;3;1	124950000	135530000	153340000	BAG family molecular chaperone regulator 1	BAG1	;;;;	7	8	8	8	5	5	3	5	5	3	5	5	3	30.4	30.4	30.4	38.76	345	345;230;274;345;311;150;160	1	75	0	33.503	20.9	18	10.1	1599000000	136760000	120820000	102640000	3	1	1	28
J9JID7;Q03252	J9JID7;Q03252	16;16	12;12	12;12	100210000	146940000	115190000	Lamin-B2	LMNB2	;	2	16	12	12	13	8	8	10	5	6	10	5	6	25.2	21.1	21.1	69.948	620	620;600	1	82	0	16.366	19.8	11.5	13.2	1333100000	154040000	109520000	114040000	4	1	3	33
J9JIE6;Q9UM00-2;Q9UM00;J3QQY2;J3KS45;J3KTQ7	J9JIE6;Q9UM00-2;Q9UM00;J3QQY2;J3KS45	4;4;4;3;2;1	4;4;4;3;2;1	4;4;4;3;2;1	543430000	576760000	595950000	Transmembrane and coiled-coil domain-containing protein 1	TMCO1	;;;;	6	4	4	4	4	4	4	4	4	4	4	4	4	19.2	19.2	19.2	27.079	239	239;169;188;104;143;152	1	60	0	41.184	19.2	19.2	19.2	6941800000	452750000	578440000	472060000	4	5	1	44
K4DI93;Q13620-1;Q13620;Q13620-3;A6NE76	K4DI93;Q13620-1;Q13620;Q13620-3	32;32;32;31;10	32;32;32;31;10	20;20;20;19;7	781890000	838090000	828780000	Cullin-4B	CUL4B	;;;	5	32	32	20	24	26	23	24	26	23	15	16	14	34	34	22.1	102.75	900	900;895;913;717;234	1	335	0	103.12	28.7	29.1	25.8	9547300000	729330000	803290000	760780000	19	16	11	166
K7EIE8;O95983-2;O95983	K7EIE8;O95983-2;O95983	3;3;3	3;3;3	3;3;3	0	42011000	0	Methyl-CpG-binding domain protein 3	MBD3	;;	3	3	3	3	1	3	2	1	3	2	1	3	2	16.6	16.6	16.6	26.322	235	235;259;291	1	23	0	7.7488	6.4	16.6	10.6	301410000	14461000	39828000	23640000	1	1	0	14
K7EIG1;O75153;I3L318;I3L4B5	K7EIG1;O75153	16;16;2;1	16;16;2;1	2;2;0;0	203100000	229570000	224000000	Clustered mitochondria protein homolog	CLUH	;	4	16	16	2	10	10	12	10	10	12	1	2	2	16.5	16.5	1.9	140.49	1251	1251;1309;164;160	1	130	0	25.392	9.1	8.8	11.6	2542400000	136560000	304160000	153790000	5	3	3	61
K7EJC8;E9PCW1;O95249;F6RU00;B4DQA8;G5E9T8;O95249-2	K7EJC8;E9PCW1;O95249;F6RU00;B4DQA8;G5E9T8;O95249-2	2;2;2;1;1;1;1	2;2;2;1;1;1;1	2;2;2;1;1;1;1	30604000	32129000	0	Golgi SNAP receptor complex member 1	GOSR1	;;;;;;	7	2	2	2	2	2	1	2	2	1	2	2	1	8.5	8.5	8.5	26.989	236	236;248;250;81;174;255;185	1	22	0.009957	1.6427	8.5	8.5	3	353850000	29842000	29361000	6924400	0	0	0	2
K7EJQ7;Q9BY50	K7EJQ7;Q9BY50	4;4	4;4	4;4	68683000	79113000	0	Signal peptidase complex catalytic subunit SEC11;Signal peptidase complex catalytic subunit SEC11C	SEC11C	;	2	4	4	4	3	2	1	3	2	1	3	2	1	24.2	24.2	24.2	18.095	161	161;192	1	33	0	8.5929	19.3	18.6	6.2	873720000	78293000	49805000	24861000	1	1	1	18
K7EKE6;K7EJE8;P36776-2;P36776;P36776-3;K7ER27;K7ERR6;K7ER56;K7EQF8	K7EKE6;K7EJE8;P36776-2;P36776;P36776-3	32;31;31;31;29;10;7;3;2	32;31;31;31;29;10;7;3;2	32;31;31;31;29;10;7;3;2	1147700000	1175500000	1252800000	Lon protease homolog, mitochondrial	LONP1	;;;;	9	32	32	32	20	23	26	20	23	26	20	23	26	52.2	52.2	52.2	95.179	845	845;829;895;959;763;242;264;210;185	1	338	0	136.99	32.3	37.2	43.6	14463000000	1044500000	1124900000	1183900000	15	13	15	178
K7EKI0;Q92817	K7EKI0;Q92817	3;3	3;3	3;3	19773000	17551000	17625000	Envoplakin	EVPL	;	2	3	3	3	3	3	3	3	3	3	3	3	3	1.5	1.5	1.5	233.83	2055	2055;2033	1	34	0.0036049	2.225	1.5	1.5	1.5	198670000	20553000	15786000	15340000	0	1	0	6
K7EKI8;O60437;K7EQ71	K7EKI8;O60437;K7EQ71	27;27;20	27;27;20	27;27;20	251410000	267760000	243040000	Periplakin	PPL	;;	3	27	27	27	18	15	18	18	15	18	18	15	18	17.6	17.6	17.6	204.49	1754	1754;1756;1115	1	186	0	45.38	10.8	10.1	11.1	2632100000	262910000	238830000	286570000	9	5	6	64
K7ELC2;P62841;K7EM56;K7EQJ5;K7EJ78;S4R456	K7ELC2;P62841;K7EM56;K7EQJ5;K7EJ78;S4R456	8;8;7;7;5;4	8;8;7;7;5;4	8;8;7;7;5;4	2183700000	2257700000	2555700000	40S ribosomal protein S15	RPS15	;;;;;	6	8	8	8	6	7	6	6	7	6	6	7	6	66.4	66.4	66.4	17.723	152	152;145;112;141;129;68	1	174	0	83.326	51.3	52	51.3	26983000000	2232100000	1982800000	2110800000	14	8	13	134
K7ELQ9;Q6UW68;K7EM09;K7EPR0;K7ER05;K7EJQ9	K7ELQ9;Q6UW68;K7EM09;K7EPR0	3;3;2;2;1;1	3;3;2;2;1;1	3;3;2;2;1;1	273170000	115670000	131940000	Transmembrane protein 205	TMEM205	;;;	6	3	3	3	2	3	2	2	3	2	2	3	2	22.9	22.9	22.9	19.27	170	170;189;120;128;88;107	1	37	0	21.258	15.3	22.9	15.3	1945000000	194560000	154670000	138470000	2	1	1	12
K7EM18;P41567;K7EQP2	K7EM18;P41567	9;9;1	9;9;1	4;4;0	544370000	654990000	620540000	Eukaryotic translation initiation factor 1	EIF1	;	3	9	9	4	8	7	6	8	7	6	4	2	2	71.9	71.9	38.8	13.607	121	121;113;53	1	108	0	211.48	71.1	71.9	60.3	7257900000	599050000	532100000	435240000	5	3	4	67
K7EM62;O95427	K7EM62;O95427	1;1	1;1	1;1	97852000	51248000	0	GPI ethanolamine phosphate transferase 1	PIGN	;	2	1	1	1	1	1	1	1	1	1	1	1	1	6.2	6.2	6.2	29.306	257	257;931	1	22	0.0024655	2.519	6.2	6.2	6.2	1605100000	116120000	40450000	23715000	0	1	0	8
K7EM93;K7EIL9;K7ES22;K7ELW9;Q9NVP2	K7EM93;K7EIL9;K7ES22;K7ELW9;Q9NVP2	2;1;1;1;1	2;1;1;1;1	2;1;1;1;1	64362000	60548000	0	Histone chaperone ASF1B	ASF1B	;;;;	5	2	2	2	2	2	0	2	2	0	2	2	0	75	75	75	5.3901	48	48;81;143;165;202	1	13	0.0029261	2.388	75	75	0	356140000	66645000	52870000	0	2	0	0	5
K7EMV3;B4DEB1;K7EK07;K7ES00;Q71DI3;Q16695;P84243;P68431;K7EP01;Q5TEC6;Q6NXT2	K7EMV3;B4DEB1;K7EK07;K7ES00;Q71DI3;Q16695;P84243;P68431;K7EP01;Q5TEC6;Q6NXT2	3;3;3;3;3;3;3;3;2;2;2	3;3;3;3;3;3;3;3;2;2;2	3;3;3;3;3;3;3;3;2;2;2	664000000	1419800000	1565700000	Histone H3;Histone H3.2;Histone H3.1t;Histone H3.3;Histone H3.1;Histone H3.3C	H3F3B;H3F3A;HIST2H3A;HIST3H3;HIST1H3A;HIST2H3PS2;H3F3C	;;;;;;;;;;	11	3	3	3	2	3	3	2	3	3	2	3	3	25	25	25	10.334	92	92;123;132;151;136;136;136;136;113;136;135	1	54	0	36.757	17.4	25	25	15794000000	604640000	1272500000	1755900000	3	3	2	36
K7EMY9;K7EPM4;K7EQR7;D6W5Y5;Q14011;B4E2X2;K7ELV6;K7ENX8;K7EJV5;K7ELT6;K7ER40;K7EQX4;K7ENN6;K7EIF7;K7EQL0;K7ELL4;B3KT17	K7EMY9;K7EPM4;K7EQR7;D6W5Y5;Q14011;B4E2X2;K7ELV6;K7ENX8;K7EJV5;K7ELT6;K7ER40	3;3;3;3;3;3;2;2;2;2;2;1;1;1;1;1;1	3;3;3;3;3;3;2;2;2;2;2;1;1;1;1;1;1	3;3;3;3;3;3;2;2;2;2;2;1;1;1;1;1;1	39229000	39908000	36407000	Cold-inducible RNA-binding protein	CIRBP	;;;;;;;;;;	17	3	3	3	3	3	2	3	3	2	3	3	2	25.8	25.8	25.8	17.045	159	159;168;202;297;172;263;70;89;105;135;173;32;37;60;79;85;244	1	35	0	7.6846	25.8	25.8	12.6	479980000	48994000	32991000	25814000	2	1	0	15
K7ENB4;K7EKX7;K7EJ20;P36969-2;P36969;R4GNE4;K7ERP4	K7ENB4;K7EKX7;K7EJ20;P36969-2;P36969;R4GNE4;K7ERP4	4;4;4;4;4;3;3	4;4;4;4;4;3;3	4;4;4;4;4;3;3	60923000	68745000	72087000	Glutathione peroxidase;Phospholipid hydroperoxide glutathione peroxidase, mitochondrial	GPX4	;;;;;;	7	4	4	4	3	3	4	3	3	4	3	3	4	28.9	28.9	28.9	19.944	180	180;194;260;170;197;145;155	1	41	0	10.802	22.8	22.8	28.9	833380000	57500000	53912000	56590000	1	2	3	22
K7ENL2;K7EMC9;Q969T9;K7EIJ0;B4DFG2;A6NG10;K7EIN1;K7ESN4;K7EIK1	K7ENL2;K7EMC9;Q969T9;K7EIJ0;B4DFG2;A6NG10	4;4;4;3;3;3;1;1;1	4;4;4;3;3;3;1;1;1	4;4;4;3;3;3;1;1;1	123740000	0	0	WW domain-binding protein 2	WBP2	;;;;;	9	4	4	4	3	2	1	3	2	1	3	2	1	22.1	22.1	22.1	24.71	231	231;257;261;167;216;239;114;152;205	1	32	0	9.8638	22.1	17.3	4.3	835320000	141570000	53624000	47985000	2	2	1	12
K7ENL3;P40763;P40763-2;G8JLH9;K7EP08	K7ENL3;P40763;P40763-2;G8JLH9	24;24;23;19;3	24;24;23;19;3	24;24;23;19;3	1238800000	1153500000	1288400000	Signal transducer and activator of transcription 3;Signal transducer and activator of transcription	STAT3	;;;	5	24	24	24	21	20	20	21	20	20	21	20	20	51.9	51.9	51.9	83.125	722	722;770;769;672;84	1	359	0	321.62	46.3	43.9	41.4	15269000000	1437400000	1080400000	1138000000	20	10	16	215
K7ENR6;V9GYH7;Q969U7;V9GZ55;K7ER45	K7ENR6;V9GYH7;Q969U7;V9GZ55	8;8;8;7;2	8;8;8;7;2	8;8;8;7;2	358320000	361020000	420330000	Proteasome assembly chaperone 2	PSMG2	;;;	5	8	8	8	7	7	8	7	7	8	7	7	8	28.3	28.3	28.3	26.696	240	240;233;264;209;98	1	111	0	20.691	22.9	27.9	28.3	4305100000	341880000	336950000	379210000	4	4	5	62
K7EQ02;Q96EP5-2;Q96EP5	K7EQ02;Q96EP5-2;Q96EP5	9;9;9	9;9;9	9;9;9	366720000	393650000	427370000	DAZ-associated protein 1	DAZAP1	;;	3	9	9	9	8	8	8	8	8	8	8	8	8	60.9	60.9	60.9	24.805	225	225;378;407	1	140	0	33.518	54.7	56	53.8	5061500000	339280000	355800000	407430000	3	5	3	57
K7EQ03;K7EP90;Q9BTD8-4;Q9BTD8-2;Q9BTD8-3;Q9BTD8;K7ER08	K7EQ03;K7EP90;Q9BTD8-4;Q9BTD8-2;Q9BTD8-3;Q9BTD8;K7ER08	4;4;4;4;4;4;3	4;4;4;4;4;4;3	4;4;4;4;4;4;3	80196000	68828000	75313000	RNA-binding protein 42	RBM42	;;;;;;	7	4	4	4	3	4	3	3	4	3	3	4	3	10.6	10.6	10.6	44.638	426	426;458;446;450;451;480;386	1	48	0	23.917	8.9	10.6	8.9	878200000	51012000	69063000	63155000	2	1	2	25
K7ER15;Q9H0R4;K7EMY7;Q9H0R4-2;K7EJQ8;K7ENF3;K7EQD2	K7ER15;Q9H0R4;K7EMY7;Q9H0R4-2	3;3;2;2;1;1;1	3;3;2;2;1;1;1	3;3;2;2;1;1;1	31252000	0	33235000	Haloacid dehalogenase-like hydrolase domain-containing protein 2	HDHD2	;;;	7	3	3	3	3	1	2	3	1	2	3	1	2	19.6	19.6	19.6	22.49	204	204;259;146;169;122;131;132	1	32	0	9.7303	19.6	3.9	10.3	363000000	32535000	7655400	20672000	3	0	1	25
K7ERC8;Q06136;K7EQS7;B4DMX0	K7ERC8;Q06136;K7EQS7;B4DMX0	4;4;2;2	4;4;2;2	4;4;2;2	94119000	67355000	0	3-ketodihydrosphingosine reductase	KDSR	;;;	4	4	4	4	3	3	1	3	3	1	3	3	1	29.1	29.1	29.1	22.62	203	203;332;155;268	1	28	0	9.5632	20.2	20.2	5.4	994100000	138810000	78353000	57473000	2	1	0	13
K7ERD8;Q15555-2;G5E9I6;Q15555-3;Q15555;K7EL66;Q15555-4;M0QX52;K7ENB3	K7ERD8;Q15555-2;G5E9I6;Q15555-3;Q15555;K7EL66;Q15555-4;M0QX52	8;8;8;8;8;7;7;5;2	8;8;8;8;8;7;7;5;2	7;7;7;7;7;6;6;4;1	144950000	205790000	183760000	Microtubule-associated protein RP/EB family member 2	MAPRE2	;;;;;;;	9	8	8	7	6	5	4	6	5	4	5	4	3	39.7	39.7	34.5	21.594	194	194;259;284;315;327;134;274;127;78	1	97	0	14.831	34.5	24.2	19.6	2156900000	138510000	170680000	190700000	3	1	5	35
K7ES61;Q9BYD3;X6RAY8;Q9BYD3-2;K7ELQ0;K7EKI4;K7ELF1;K7EJ73	K7ES61;Q9BYD3;X6RAY8;Q9BYD3-2;K7ELQ0;K7EKI4;K7ELF1	6;6;5;5;4;3;3;1	6;6;5;5;4;3;3;1	6;6;5;5;4;3;3;1	102300000	139330000	149120000	39S ribosomal protein L4, mitochondrial	MRPL4	;;;;;;	8	6	6	6	4	6	4	4	6	4	4	6	4	33.3	33.3	33.3	33.792	300	300;311;357;263;220;127;163;119	1	62	0	24.326	21.7	33.3	21.7	1426900000	91542000	188680000	118350000	4	6	1	39
K7ES92;F5H4A3;F5H1R4;K7ES98;K7EM85;Q92619;Q92619-2	K7ES92;F5H4A3;F5H1R4;K7ES98;K7EM85;Q92619;Q92619-2	3;3;3;3;3;3;3	3;3;3;3;3;3;3	3;3;3;3;3;3;3	89731000	92637000	102510000	Minor histocompatibility protein HA-1;Minor histocompatibility antigen HA-1	HMHA1	;;;;;;	7	3	3	3	3	2	3	3	2	3	3	2	3	4.2	4.2	4.2	84.622	771	771;1004;1019;1140;1163;1136;1152	1	32	0	4.4692	4.2	3	4.2	973760000	150150000	23171000	117470000	3	1	2	18
M0QWZ7;Q9NP81;E7EX87;M0R2C6;Q9NP81-2;M0R259;B4DJM9;M0QX29;M0R2H5;M0R1C0	M0QWZ7;Q9NP81;E7EX87;M0R2C6;Q9NP81-2;M0R259	12;12;10;10;10;6;5;4;2;1	12;12;10;10;10;6;5;4;2;1	12;12;10;10;10;6;5;4;2;1	164570000	152570000	164420000	Serine--tRNA ligase, mitochondrial	SARS2	;;;;;	10	12	12	12	8	8	9	8	8	9	8	8	9	33.4	33.4	33.4	58.182	518	518;518;518;588;520;328;236;187;135;90	1	111	0	57.889	22.8	21.8	24.5	1976900000	176680000	148260000	164010000	5	6	4	52
M0QX35;Q8N7H5;F8W9Q2;Q8N7H5-2;B4DGJ5	M0QX35;Q8N7H5;F8W9Q2;Q8N7H5-2;B4DGJ5	7;7;6;6;4	7;7;6;6;4	7;7;6;6;4	66651000	0	67626000	RNA polymerase II-associated factor 1 homolog	PAF1	;;;;	5	7	7	7	4	4	4	4	4	4	4	4	4	18.6	18.6	18.6	55.472	485	485;531;462;485;288	1	49	0	24.271	11.8	8.5	10.1	826650000	63909000	78544000	43176000	3	0	1	13
M0QY97;Q9UPT8	M0QY97;Q9UPT8	4;4	4;4	4;4	53492000	50830000	54932000	Zinc finger CCCH domain-containing protein 4	ZC3H4	;	2	4	4	4	4	4	3	4	4	3	4	4	3	10.5	10.5	10.5	95.425	910	910;1303	1	35	0	4.1779	10.5	10.5	8.2	578640000	69256000	75578000	47134000	0	3	2	12
M0QYA2;Q9NWS0;M0R2P8;M0R3A4;M0QXD5;M0R0J2;M0QYF4;Q9NWS0-3	M0QYA2;Q9NWS0;M0R2P8;M0R3A4;M0QXD5	4;4;2;2;2;1;1;1	4;4;2;2;2;1;1;1	3;3;2;2;1;0;0;0	64142000	72684000	88841000	PIH1 domain-containing protein 1	PIH1D1	;;;;	8	4	4	3	3	3	3	3	3	3	2	2	2	28.6	28.6	19.8	30.672	273	273;290;114;183;236;82;164;199	1	37	0	8.5752	23.4	23.4	23.4	836740000	52933000	80309000	80882000	0	3	2	12
M0QYH2;Q96T60;M0QX49;M0QYI1	M0QYH2;Q96T60	5;5;1;1	5;5;1;1	1;1;0;0	65023000	63222000	59060000	Bifunctional polynucleotide phosphatase/kinase;Polynucleotide 3-phosphatase;Polynucleotide 5-hydroxyl-kinase	PNKP	;	4	5	5	1	4	3	4	4	3	4	1	1	1	16.7	16.7	2.7	53.64	490	490;521;51;66	1	43	0	11.908	14.3	9	11.4	715840000	70568000	53245000	59949000	3	3	2	31
M0QYZ2;M0R0N4;P53680;X6R390;P53680-2;M0QZ21;M0R1S0	M0QYZ2;M0R0N4;P53680;X6R390;P53680-2;M0QZ21	7;6;6;5;5;4;2	7;6;6;5;5;4;2	7;6;6;5;5;4;2	220440000	204240000	173900000	AP-2 complex subunit sigma	AP2S1	;;;;;	7	7	7	7	5	5	3	5	5	3	5	5	3	44.3	44.3	44.3	18.929	158	158;144;142;156;104;122;92	1	65	0	9.2007	32.3	31.6	17.7	2514800000	188010000	332880000	108680000	4	3	0	36
M0QZ22;Q5PRF9;M0R0X3;M0QY61;M0QXV2	M0QZ22;Q5PRF9;M0R0X3	5;5;3;2;1	5;5;3;2;1	5;5;3;2;1	39066000	36387000	37368000	Protein Smaug homolog 2	SAMD4B	;;	5	5	5	5	4	3	3	4	3	3	4	3	3	12.6	12.6	12.6	75.292	692	692;694;325;219;75	1	44	0	4.8257	8.5	5.1	5.1	445340000	44077000	26914000	25268000	1	0	0	9
M0QZR4;Q92888;Q92888-3;Q92888-2;Q6NX52;M0QYC1;M0QYS3;M0QZH8;M0R2C7;M0R3H5	M0QZR4;Q92888;Q92888-3;Q92888-2;Q6NX52;M0QYC1	16;16;16;15;12;9;5;4;3;1	16;16;16;15;12;9;5;4;3;1	16;16;16;15;12;9;5;4;3;1	273250000	263810000	264760000	Rho guanine nucleotide exchange factor 1	ARHGEF1	;;;;;	10	16	16	16	13	11	11	13	11	11	13	11	11	19.6	19.6	19.6	108.32	968	968;912;927;879;948;702;307;275;291;88	1	175	0	83.67	17.1	13.4	13.9	3295100000	318550000	221200000	252300000	9	5	5	76
M0QZS0;M0R150;Q6ZSZ5-2;Q6ZSZ5	M0QZS0;M0R150;Q6ZSZ5-2;Q6ZSZ5	2;2;2;2	2;2;2;2	2;2;2;2	0	0	13548000	Rho guanine nucleotide exchange factor 18	ARHGEF18	;;;	4	2	2	2	1	0	1	1	0	1	1	0	1	2.8	2.8	2.8	91.296	812	812;1114;1015;1173	1	9	0.0019846	2.5891	0.9	0	2	359570000	89619000	0	12665000	1	0	0	4
M0QZW1;Q9BZL6;M0R2R2;M0QXC6	M0QZW1;Q9BZL6;M0R2R2	5;5;3;1	5;5;3;1	4;4;2;1	34337000	0	33363000	Serine/threonine-protein kinase;Serine/threonine-protein kinase D2	PRKD2	;;	4	5	5	4	2	2	3	2	2	3	1	1	2	9.2	9.2	7.7	97.77	888	888;878;721;73	1	25	0	10.878	3.3	3.5	5.2	226030000	20675000	19685000	40607000	1	1	0	10
M0R0F0;P46782;M0R0R2;M0QZN2	M0R0F0;P46782;M0R0R2;M0QZN2	12;12;11;7	12;12;11;7	12;12;11;7	2355400000	2465700000	2229300000	40S ribosomal protein S5;40S ribosomal protein S5, N-terminally processed	RPS5	;;;	4	12	12	12	11	10	11	11	10	11	11	10	11	59	59	59	22.391	200	200;204;225;134	1	209	0	84.458	58.5	55	58.5	29780000000	2588900000	2363000000	2040700000	10	9	9	143
M0R0P9;Q0VAN0;P31751;J3QKW1;J3QL45;M0QZW8;M0R283;J3QLS6;C9JHS6;J3KTP4;G3V4I6;C9J258;J3QQM6;J3KSY8;G3V3K5;C9JC83;C9JIJ1;M0R275;J3KRI8;F6YBB4;A8MX96;E7EVP8;F8VS91;M0QZK3;Q9Y243-2;Q9Y243	M0R0P9;Q0VAN0;P31751;J3QKW1;J3QL45	6;6;6;4;3;2;2;2;2;1;1;1;1;1;1;1;1;1;1;1;1;1;1;1;1;1	6;6;6;4;3;2;2;2;2;1;1;1;1;1;1;1;1;1;1;1;1;1;1;1;1;1	4;4;4;3;2;1;2;1;1;0;0;0;0;0;0;0;0;1;0;0;0;0;0;0;0;0	54211000	57194000	56218000	RAC-beta serine/threonine-protein kinase	AKT2	;;;;	26	6	6	4	5	5	3	5	5	3	3	4	3	14	14	9.3	51.571	450	450;438;481;292;106;56;117;157;184;51;91;95;96;99;105;107;119;129;130;132;133;134;139;151;465;479	1	50	0	10.32	11.1	11.6	6.4	712070000	67978000	100490000	42873000	3	1	0	17
M0R165;Q9UBC2-3;Q9UBC2;Q9UBC2-2;Q9UBC2-4;M0R2S2;M0R1V5;M0QX30;M0R3I1;K7EJR2;M0R330	M0R165;Q9UBC2-3;Q9UBC2;Q9UBC2-2;Q9UBC2-4;M0R2S2	11;11;11;11;10;7;3;2;2;1;1	11;11;11;11;10;7;3;2;2;1;1	11;11;11;11;10;7;3;2;2;1;1	160010000	169010000	189860000	Epidermal growth factor receptor substrate 15-like 1	EPS15L1	;;;;;	11	11	11	11	10	7	8	10	7	8	10	7	8	21.7	21.7	21.7	83.474	756	756;754;864;910;601;447;110;90;213;79;83	1	96	0	22.686	18.7	11.1	12.4	1958300000	212590000	110930000	179740000	3	4	2	39
M0R208;Q16740;M0QYV5	M0R208;Q16740	7;7;3	7;7;3	7;7;3	154060000	153990000	150170000	ATP-dependent Clp protease proteolytic subunit;ATP-dependent Clp protease proteolytic subunit, mitochondrial	CLPP	;	3	7	7	7	7	6	7	7	6	7	7	6	7	47.9	47.9	47.9	20.568	190	190;277;160	1	69	0	41.864	47.9	40	47.9	1824200000	162530000	135310000	190140000	2	5	3	34
M0R2A0;Q5UCC4-2;Q5UCC4	M0R2A0;Q5UCC4-2;Q5UCC4	3;3;3	3;3;3	3;3;3	103300000	93513000	89185000	ER membrane protein complex subunit 10	EMC10	;;	3	3	3	3	3	2	3	3	2	3	3	2	3	13.2	13.2	13.2	38.975	371	371;254;262	1	31	0	53.537	13.2	11.3	13.2	1077100000	127820000	64476000	103580000	2	2	2	27
M0R2B7;P28340;M0QZR8;M0QXE6;M0QZB4;M0QXQ2;M0R3H8	M0R2B7;P28340;M0QZR8	10;10;9;3;2;1;1	10;10;9;3;2;1;1	10;10;9;3;2;1;1	88120000	91771000	83305000	DNA polymerase;DNA polymerase delta catalytic subunit	POLD1	;;	7	10	10	10	6	5	3	6	5	3	6	5	3	11.9	11.9	11.9	126.39	1133	1133;1107;1009;289;188;291;397	1	78	0	30.615	7.5	5.2	3.1	1066100000	95346000	62726000	59524000	4	3	1	33
M0R3D4;Q9UI14;M0QXH1;M0R1H9	M0R3D4;Q9UI14;M0QXH1;M0R1H9	2;2;1;1	2;2;1;1	2;2;1;1	0	50850000	0	Prenylated Rab acceptor protein 1	RABAC1	;;;	4	2	2	2	1	2	1	1	2	1	1	2	1	19.2	19.2	19.2	17.056	151	151;185;109;149	1	21	0	20.243	9.3	19.2	9.3	535840000	29910000	45233000	25818000	1	1	1	14
O00116;B8ZZ81	O00116	23;5	23;5	23;5	932910000	1018500000	1051300000	Alkyldihydroxyacetonephosphate synthase, peroxisomal	AGPS		2	23	23	23	22	18	17	22	18	17	22	18	17	49.7	49.7	49.7	72.911	658	658;189	1	301	0	171.3	46	40.3	37.7	11724000000	1008000000	949880000	874580000	11	13	14	158
O00139-2;O00139-1;O00139-5;O00139;O00139-4;D6R9M0;H0Y8H2;Q8N4N8	O00139-2;O00139-1;O00139-5;O00139;O00139-4	10;10;10;10;10;2;1;1	10;10;10;10;10;2;1;1	10;10;10;10;10;2;1;1	74368000	66835000	71467000	Kinesin-like protein KIF2A	KIF2A	;;;;	8	10	10	10	6	6	9	6	6	9	6	6	9	16.7	16.7	16.7	75.042	660	660;679;686;706;744;284;130;673	1	99	0	17.921	11.2	10.2	14.4	936440000	84484000	72362000	104810000	1	3	3	34
O00148;O00148-2;B1Q2N1;K7EQN7;K7EPJ3	O00148;O00148-2;B1Q2N1	21;14;11;10;7	9;5;3;3;2	9;5;3;3;2	809390000	905770000	823640000	ATP-dependent RNA helicase DDX39A	DDX39A	;;	5	21	9	9	21	20	20	9	8	8	9	8	8	57.6	27.2	27.2	49.129	427	427;322;267;255;189	1	157	0	119.45	57.6	52.5	52.5	10840000000	860930000	808140000	847090000	12	10	7	112
O00151	O00151	13	13	13	479420000	539600000	533690000	PDZ and LIM domain protein 1	PDLIM1		1	13	13	13	12	11	10	12	11	10	12	11	10	63.8	63.8	63.8	36.071	329	329	1	159	0	83.219	59	54.1	50.5	6707000000	559930000	480340000	517270000	8	10	9	95
O00154-4;O00154-6;O00154-7;O00154;O00154-5;B4DUX0;K7EKP8;O00154-2;O00154-3;F5GWE2;Q6ZUV0	O00154-4;O00154-6;O00154-7;O00154;O00154-5;B4DUX0;K7EKP8;O00154-2;O00154-3	14;13;13;13;12;11;10;9;9;5;1	14;13;13;13;12;11;10;9;9;5;1	14;13;13;13;12;11;10;9;9;5;1	803740000	787400000	890070000	Cytosolic acyl coenzyme A thioester hydrolase	ACOT7	;;;;;;;;	11	14	14	14	11	11	12	11	11	12	11	11	12	56.5	56.5	56.5	37.419	338	338;329;370;380;350;265;279;246;283;223;252	1	208	0	122.78	40.8	46.7	48.8	10628000000	868370000	700480000	826840000	10	9	11	109
O00170;E9PMH2;V9GYQ3	O00170;E9PMH2	14;10;4	14;10;4	14;10;4	324720000	347170000	340550000	AH receptor-interacting protein	AIP	;	3	14	14	14	9	10	9	9	10	9	9	10	9	58.5	58.5	58.5	37.636	330	330;232;188	1	168	0	58.799	37.3	43.3	40	4258600000	211280000	305270000	283620000	8	7	4	87
O00178;F5H257;F5H716;B0QY59	O00178	7;1;1;1	7;1;1;1	7;1;1;1	71682000	69709000	77092000	GTP-binding protein 1	GTPBP1		4	7	7	7	5	4	3	5	4	3	5	4	3	17	17	17	72.453	669	669;86;152;349	1	54	0	25.098	13.6	8.4	5.5	917480000	79955000	71171000	59379000	2	1	1	24
O00186	O00186	11	11	11	253420000	253080000	237390000	Syntaxin-binding protein 3	STXBP3		1	11	11	11	9	9	10	9	9	10	9	9	10	26.7	26.7	26.7	67.764	592	592	1	148	0	25.501	18.1	19.3	20.9	3060200000	233850000	212570000	224650000	2	5	5	63
O00194;K7ES41;H3BU81;H3BUD9;H3BS49;H3BVH7;H3BN55;P51159-2;P51159	O00194	5;2;1;1;1;1;1;1;1	5;2;1;1;1;1;1;1;1	5;2;1;1;1;1;1;1;1	137220000	123350000	119220000	Ras-related protein Rab-27B	RAB27B		9	5	5	5	5	4	4	5	4	4	5	4	4	27.1	27.1	27.1	24.608	218	218;87;71;95;136;146;185;213;221	1	60	0	11.937	27.1	22	22	1628100000	136370000	113170000	103100000	1	0	0	17
O00203-3;O00203;Q13367;Q13367-4;Q13367-3;F5GYB0;H0YBD0;F5GWU4	O00203-3;O00203	23;23;4;4;3;1;1;1	23;23;4;4;3;1;1;1	23;23;4;4;3;1;1;1	462260000	421230000	538800000	AP-3 complex subunit beta-1	AP3B1	;	8	23	23	23	18	17	18	18	17	18	18	17	18	26.5	26.5	26.5	116.19	1045	1045;1094;1082;1101;1050;141;154;193	1	216	0	83.119	19.9	19.6	19.8	5948600000	725180000	429560000	443110000	9	7	7	88
O00231;O00231-2;J3QRY4;J3QS13;J3KSW3	O00231;O00231-2	22;21;7;5;1	22;21;7;5;1	22;21;7;5;1	2018400000	2041700000	2146300000	26S proteasome non-ATPase regulatory subunit 11	PSMD11	;	5	22	22	22	21	20	18	21	20	18	21	20	18	62.3	62.3	62.3	47.463	422	422;423;187;90;45	1	346	0	172.13	59.7	57.6	52.1	24851000000	2064200000	1842600000	1671100000	20	17	16	229
O00232;O00232-2;J3KTJ5;J3KSK1	O00232;O00232-2	23;21;1;1	23;21;1;1	23;21;1;1	1168000000	1144600000	1066600000	26S proteasome non-ATPase regulatory subunit 12	PSMD12	;	4	23	23	23	22	19	19	22	19	19	22	19	19	59.4	59.4	59.4	52.904	456	456;436;38;42	1	292	0	161.34	56.8	53.7	47.8	14140000000	1306100000	930640000	997510000	19	9	9	174
O00233;J3KN29;F5H5V4;F5GX23;F8W7V8;O00233-2;F5H7X1;O00233-3;F5H169	O00233;J3KN29;F5H5V4;F5GX23;F8W7V8;O00233-2;F5H7X1	7;6;5;5;5;5;4;3;2	7;6;5;5;5;5;4;3;2	7;6;5;5;5;5;4;3;2	305430000	232440000	261240000	26S proteasome non-ATPase regulatory subunit 9	PSMD9	;;;;;;	9	7	7	7	5	7	7	5	7	7	5	7	7	34.5	34.5	34.5	24.682	223	223;222;153;179;207;209;85;118;128	1	98	0	26.593	26.9	34.5	34.5	3391000000	304310000	240970000	204870000	2	5	4	43
O00264;O00264-2	O00264;O00264-2	7;4	6;4	6;4	589340000	572690000	517480000	Membrane-associated progesterone receptor component 1	PGRMC1	;	2	7	6	6	7	6	7	6	5	6	6	5	6	41.5	36.9	36.9	21.671	195	195;143	1	88	0	27.306	41.5	31.3	41.5	7370000000	679970000	461750000	451010000	6	4	2	54
O00267-2;O00267;M0QYL9	O00267-2;O00267	24;24;1	24;24;1	24;24;1	571510000	615860000	578100000	Transcription elongation factor SPT5	SUPT5H	;	3	24	24	24	19	19	20	19	19	20	19	19	20	31.4	31.4	31.4	120.5	1083	1083;1087;164	1	277	0	127.82	26.4	26.7	26.7	7202200000	537260000	577030000	584230000	15	18	9	150
O00273;O00273-2;K7ERT1	O00273;O00273-2	6;5;2	6;5;2	6;5;2	61918000	68036000	90534000	DNA fragmentation factor subunit alpha	DFFA	;	3	6	6	6	5	5	4	5	5	4	5	5	4	22.1	22.1	22.1	36.521	331	331;268;159	1	63	0	29.002	18.4	18.7	15.1	926720000	63249000	61612000	67032000	2	3	3	28
O00299	O00299	14	14	14	6024400000	6173500000	6941800000	Chloride intracellular channel protein 1	CLIC1		1	14	14	14	13	13	14	13	13	14	13	13	14	77.6	77.6	77.6	26.922	241	241	1	290	0	200.44	73.9	73.9	77.6	74872000000	5758700000	5844200000	6786600000	23	20	20	286
O00330-3;O00330;H0YD97;O00330-2;E9PLU0;E9PRI6	O00330-3;O00330;H0YD97;O00330-2	4;4;2;2;1;1	4;4;2;2;1;1	4;4;2;2;1;1	52745000	47267000	51663000	Pyruvate dehydrogenase protein X component, mitochondrial	PDHX	;;;	6	4	4	4	4	4	3	4	4	3	4	4	3	12.8	12.8	12.8	51.459	486	486;501;189;274;151;182	1	45	0	7.9362	12.8	12.8	6.6	633640000	55160000	49856000	39353000	2	1	1	27
O00399;E5RK00;E5RIK5;E5RGW9;E5RFU3	O00399;E5RK00	4;2;1;1;1	4;2;1;1;1	4;2;1;1;1	77218000	67792000	0	Dynactin subunit 6	DCTN6	;	5	4	4	4	3	3	2	3	3	2	3	3	2	26.8	26.8	26.8	20.747	190	190;170;37;46;73	1	27	0	7.8355	21.6	21.6	16.8	595080000	92495000	74174000	33448000	1	2	0	13
O00401	O00401	3	3	3	45410000	43761000	0	Neural Wiskott-Aldrich syndrome protein	WASL		1	3	3	3	2	3	3	2	3	3	2	3	3	11.5	11.5	11.5	54.826	505	505	1	27	0	6.9268	9.9	11.5	11.5	518550000	39837000	37269000	36675000	1	1	1	11
O00410;O00410-3;H0Y8C6;O00410-2;B4E0R6;E7ETV3;C9JMV5;E7EQT5;E7EV12;H0Y3V4;E7EWK4;E7EX05;C9JZD8;C9JQT6;E7ESA1;E7ESZ1;E7ETV8;C9JZ53;C9J875;C9JXE0	O00410;O00410-3;H0Y8C6;O00410-2;B4E0R6	48;48;46;43;40;10;9;8;8;8;6;6;5;5;5;5;5;4;3;2	48;48;46;43;40;10;9;8;8;8;6;6;5;5;5;5;5;4;3;2	46;46;44;41;38;10;9;8;8;8;6;6;5;5;5;5;5;4;3;2	4298200000	4467600000	4343200000	Importin-5	IPO5	;;;;	20	48	48	46	42	41	41	42	41	41	41	39	39	61.8	61.8	60.1	123.63	1097	1097;1115;1099;1037;972;170;165;126;142;182;117;119;74;88;98;106;128;77;75;64	1	800	0	323.31	54.1	50.1	49.1	54628000000	4389700000	4193000000	3869300000	43	46	35	520
O00411;K7EMH3	O00411	3;1	3;1	3;1	0	0	14297000	DNA-directed RNA polymerase, mitochondrial	POLRMT		2	3	3	3	2	0	2	2	0	2	2	0	2	3.5	3.5	3.5	138.62	1230	1230;349	1	17	0.0012604	2.7481	2.6	0	2.8	185600000	14332000	0	15147000	2	0	1	9
O00425;O00425-2;F8WD15	O00425	20;8;4	20;8;4	18;7;4	772340000	770380000	826460000	Insulin-like growth factor 2 mRNA-binding protein 3	IGF2BP3		3	20	20	18	16	16	14	16	16	14	14	14	12	42.7	42.7	38.7	63.704	579	579;198;81	1	251	0	151.29	34.2	35.6	31.6	9262100000	843990000	645700000	716370000	15	11	11	133
O00429-4;O00429-2;G8JLD5;O00429-5;O00429-3;O00429;O00429-8;O00429-6;O00429-7;F8VZ52;F8W1W3;B4DDQ3;B4DPZ9;F8VUJ9;F8VR28;F8VYL3;H0YHY4;H0YI79	O00429-4;O00429-2;G8JLD5;O00429-5;O00429-3;O00429;O00429-8;O00429-6;O00429-7	34;34;33;33;33;33;33;32;19;14;9;9;8;7;4;4;3;1	34;34;33;33;33;33;33;32;19;14;9;9;8;7;4;4;3;1	34;34;33;33;33;33;33;32;19;14;9;9;8;7;4;4;3;1	1061900000	966750000	1078500000	Dynamin-1-like protein	DNM1L	;;;;;;;;	18	34	34	34	27	26	29	27	26	29	27	26	29	61.7	61.7	61.7	78.099	699	699;725;712;710;710;736;738;749;533;261;168;180;156;172;97;117;54;48	1	424	0	212.95	45.9	46.6	49.8	13331000000	1094400000	904220000	1057600000	9	12	17	172
O00442;O00442-2;A6NIC1	O00442;O00442-2	10;9;1	10;9;1	10;9;1	202680000	201870000	198970000	RNA 3-terminal phosphate cyclase	RTCA	;	3	10	10	10	8	7	6	8	7	6	8	7	6	34.2	34.2	34.2	39.336	366	366;379;49	1	99	0	31.612	29.2	25.7	19.7	2456300000	229250000	156260000	159320000	2	3	2	37
O00461;F8W785	O00461;F8W785	7;6	7;6	7;6	115870000	142250000	138500000	Golgi integral membrane protein 4	GOLIM4	;	2	7	7	7	6	5	5	6	5	5	6	5	5	11.9	11.9	11.9	81.879	696	696;668	1	83	0	22.203	10.1	8.9	8.9	1619400000	144970000	89105000	96003000	4	3	2	33
O00468-6;O00468-3;O00468-7;O00468-5;O00468-4;O00468;O00468-2;H0Y5U1	O00468-6;O00468-3;O00468-7;O00468-5;O00468-4;O00468;O00468-2	13;12;12;11;11;11;10;1	13;12;12;11;11;11;10;1	13;12;12;11;11;11;10;1	101920000	70695000	97162000	Agrin;Agrin N-terminal 110 kDa subunit;Agrin C-terminal 110 kDa subunit;Agrin C-terminal 90 kDa fragment;Agrin C-terminal 22 kDa fragment	AGRN	;;;;;;	8	13	13	13	8	7	5	8	7	5	8	7	5	9.1	9.1	9.1	214.84	2045	2045;2049;2063;2057;2059;2067;1963;271	1	82	0	23.514	5.7	4.9	3.5	1152800000	107160000	106990000	71881000	3	1	2	33
O00469;O00469-2;E7ETU9;B3KWS3;C9JXZ0;F8WEW3	O00469;O00469-2;E7ETU9;B3KWS3	13;13;12;7;4;1	13;13;12;7;4;1	13;13;12;7;4;1	327670000	317970000	326120000	Procollagen-lysine,2-oxoglutarate 5-dioxygenase 2	PLOD2	;;;	6	13	13	13	12	12	11	12	12	11	12	12	11	21.3	21.3	21.3	84.685	737	737;758;703;418;229;98	1	181	0	44.012	20.1	20.1	18.3	4107800000	368150000	286230000	318300000	7	5	4	76
O00471	O00471	9	9	1	86110000	71051000	80666000	Exocyst complex component 5	EXOC5		1	9	9	1	4	4	4	4	4	4	0	0	0	18.1	18.1	2.1	81.852	708	708	1	69	0	18.567	8.5	5.5	5.5	1001400000	64561000	53511000	63305000	2	0	2	30
O00487	O00487	11	11	11	695660000	500970000	551520000	26S proteasome non-ATPase regulatory subunit 14	PSMD14		1	11	11	11	10	10	10	10	10	10	10	10	10	44.8	44.8	44.8	34.577	310	310	1	159	0	63.232	40.3	42.6	42.6	7447100000	780510000	451370000	505310000	7	4	6	96
O00499-9;O00499-10;O00499-7;O00499-8;O00499-4;O00499-6;O00499-11;O00499-3;O00499-2;O00499-5;O00499;S4R418;F5H0W4;F5H533;Q9UBW5-2;Q9UBW5;P49418-2;P49418	O00499-9;O00499-10;O00499-7;O00499-8;O00499-4;O00499-6;O00499-11;O00499-3;O00499-2;O00499-5;O00499	12;12;12;12;12;12;12;12;12;12;12;1;1;1;1;1;1;1	12;12;12;12;12;12;12;12;12;12;12;1;1;1;1;1;1;1	12;12;12;12;12;12;12;12;12;12;12;1;1;1;1;1;1;1	261520000	303220000	270200000	Myc box-dependent-interacting protein 1	BIN1	;;;;;;;;;;	18	12	12	12	8	8	9	8	8	9	8	8	9	45.5	45.5	45.5	45.563	409	409;424;439;454;475;482;497;506;518;550;593;531;539;653;533;565;653;695	1	131	0	50.903	31.8	30.8	34.2	3505100000	228540000	222880000	249420000	5	3	3	70
O00505;H0Y4S9	O00505	7;1	5;1	5;1	74645000	128880000	137630000	Importin subunit alpha-4	KPNA3		2	7	5	5	6	4	6	4	2	4	4	2	4	21.9	17.5	17.5	57.81	521	521;91	1	54	0	7.6595	17.1	8.8	17.1	1642900000	89338000	83483000	132280000	0	0	2	22
O00560;O00560-3;B4DHN5;E9PBU7	O00560;O00560-3;B4DHN5;E9PBU7	10;9;7;7	10;9;7;7	1;1;0;0	696960000	661330000	587460000	Syntenin-1	SDCBP	;;;	4	10	10	1	8	10	8	8	10	8	1	1	1	57.7	57.7	6	32.444	298	298;292;239;244	1	174	0	163.91	43	57.7	49	8669600000	742820000	771050000	550990000	10	10	9	123
O00571;O00571-2;B4E3C4;B4DLA0	O00571;O00571-2	34;33;7;5	34;33;7;5	10;9;3;4	3197500000	3345500000	3232100000	ATP-dependent RNA helicase DDX3X	DDX3X	;	4	34	34	10	32	30	32	32	30	32	9	10	8	60.4	60.4	19.3	73.243	662	662;646;308;139	1	593	0	308.89	57.6	54.2	56.9	39020000000	3432200000	3252600000	3058300000	29	27	25	309
O00622	O00622	6	6	6	121990000	125380000	124170000	Protein CYR61	CYR61		1	6	6	6	4	4	5	4	4	5	4	4	5	19.2	19.2	19.2	42.026	381	381	1	68	0	19.77	13.9	12.9	16.5	1652400000	143810000	72185000	141770000	1	2	0	18
O00625	O00625	10	10	10	732750000	707590000	644080000	Pirin	PIR		1	10	10	10	9	8	7	9	8	7	9	8	7	54.8	54.8	54.8	32.113	290	290	1	142	0	36.205	54.8	42.1	33.8	8664200000	886170000	770890000	671730000	7	6	3	70
O00629;H7C4F6	O00629	9;3	9;3	7;3	659710000	653120000	629600000	Importin subunit alpha-3	KPNA4		2	9	9	7	8	6	7	8	6	7	6	4	5	31.7	31.7	27.3	57.886	521	521;170	1	105	0	41.044	26.1	17.5	22.8	7845300000	640390000	358390000	405160000	7	4	5	66
O00743;O00743-2;O00743-3;B7Z3E2;Q5T1S7	O00743;O00743-2;O00743-3;B7Z3E2	12;11;11;7;2	12;11;11;7;2	12;11;11;7;2	328540000	322650000	380220000	Serine/threonine-protein phosphatase 6 catalytic subunit;Serine/threonine-protein phosphatase 6 catalytic subunit, N-terminally processed	PPP6C	;;;	5	12	12	12	10	9	8	10	9	8	10	9	8	48.5	48.5	48.5	35.144	305	305;283;342;158;125	1	141	0	84.145	43.6	39.3	36.7	4235500000	361080000	269830000	311470000	12	5	5	91
O00762;O00762-2;O00762-3;K4DI81;O00762-4	O00762;O00762-2;O00762-3	4;3;3;1;1	4;3;3;1;1	4;3;3;1;1	0	0	71808000	Ubiquitin-conjugating enzyme E2 C	UBE2C	;;	5	4	4	4	2	2	3	2	2	3	2	2	3	37.4	37.4	37.4	19.652	179	179;140;150;50;161	1	27	0	10.933	21.8	21.8	27.9	535700000	36621000	36878000	69196000	0	0	0	11
O00764;F2Z2Y4;O00764-3;O00764-2;A8MV33	O00764;F2Z2Y4;O00764-3;O00764-2	16;14;13;12;1	16;14;13;12;1	16;14;13;12;1	901080000	846320000	776980000	Pyridoxal kinase	PDXK	;;;	5	16	16	16	11	10	10	11	10	10	11	10	10	63.1	63.1	63.1	35.102	312	312;272;239;284;87	1	178	0	140.38	51	46.5	39.7	11091000000	835280000	914410000	635440000	12	8	9	120
O00767	O00767	5	5	5	194850000	269920000	222460000	Acyl-CoA desaturase	SCD		1	5	5	5	3	4	3	3	4	3	3	4	3	17.8	17.8	17.8	41.522	359	359	1	56	0	12.102	14.5	14.2	14.2	2737400000	124960000	266920000	189100000	1	5	4	32
O14548;E5RJZ1;H0YBD2	O14548;E5RJZ1;H0YBD2	3;2;2	3;2;2	3;2;2	63228000	67266000	77195000	Cytochrome c oxidase subunit 7A-related protein, mitochondrial	COX7A2L	;;	3	3	3	3	3	2	2	3	2	2	3	2	2	48.2	48.2	48.2	12.615	114	114;79;95	1	32	0	7.4104	48.2	40.4	19.3	807560000	71066000	46579000	56021000	2	2	2	21
O14561;I3L505;H3BNK3	O14561;I3L505;H3BNK3	4;2;2	4;2;2	4;2;2	305800000	388170000	311970000	Acyl carrier protein, mitochondrial;Acyl carrier protein	NDUFAB1	;;	3	4	4	4	3	3	2	3	3	2	3	3	2	21.2	21.2	21.2	17.417	156	156;70;111	1	67	0	14.914	15.4	15.4	15.4	4292200000	270110000	388580000	228790000	2	2	2	33
O14579;M0QXB4;O14579-3;O14579-2;M0R061	O14579;M0QXB4;O14579-3;O14579-2;M0R061	10;9;8;8;5	10;9;8;8;5	10;9;8;8;5	777610000	756460000	775350000	Coatomer subunit epsilon	COPE	;;;;	5	10	10	10	10	10	10	10	10	10	10	10	10	44.5	44.5	44.5	34.482	308	308;331;256;257;146	1	190	0	160.78	44.5	44.5	44.5	9271000000	844520000	722770000	737660000	11	15	13	147
O14617-4;O14617;O14617-5;G5E988;O14617-2;E7EMM2;O14617-3;K7ELX8;K7ERW8	O14617-4;O14617;O14617-5;G5E988;O14617-2;E7EMM2;O14617-3	27;27;27;21;21;19;19;3;2	27;27;27;21;21;19;19;3;2	27;27;27;21;21;19;19;3;2	465620000	431510000	455000000	AP-3 complex subunit delta-1	AP3D1	;;;;;;	9	27	27	27	19	19	19	19	19	19	19	19	19	37.1	37.1	37.1	114.71	1021	1021;1153;1215;1112;1112;984;984;193;155	1	251	0	81.593	27.4	24.2	27.4	5301100000	451470000	381990000	419070000	12	13	5	123
O14646-2;O14646;H3BTW3	O14646-2;O14646	5;5;1	5;5;1	2;2;0	31008000	36983000	19619000	Chromodomain-helicase-DNA-binding protein 1	CHD1	;	3	5	5	2	3	4	3	3	4	3	1	1	0	3.2	3.2	1.3	196.59	1709	1709;1710;1098	1	37	0	6.0905	1.9	2.5	1.9	328240000	18226000	42184000	18854000	2	2	1	22
O14656;O14656-2	O14656;O14656-2	6;3	6;3	6;3	104030000	74590000	85177000	Torsin-1A	TOR1A	;	2	6	6	6	5	3	3	5	3	3	5	3	3	18.7	18.7	18.7	37.808	332	332;197	1	48	0	9.1733	15.4	11.7	10.5	1115200000	119110000	57690000	74902000	2	2	1	20
O14657;H0Y7C8	O14657;H0Y7C8	4;2	4;2	4;2	268210000	134060000	179620000	Torsin-1B	TOR1B	;	2	4	4	4	4	4	3	4	4	3	4	4	3	14.3	14.3	14.3	37.978	336	336;141	1	50	0	30.05	14.3	14.3	10.1	1813200000	254920000	155630000	172370000	2	1	1	17
O14684	O14684	6	6	6	1815900000	2100100000	1751700000	Prostaglandin E synthase	PTGES		1	6	6	6	6	5	6	6	5	6	6	5	6	31.6	31.6	31.6	17.102	152	152	1	89	0	25.453	31.6	23.7	31.6	23015000000	1817100000	2092800000	1615900000	6	4	7	73
O14737;B4DE64;K7EQA1;K7ESJ4;Q3HM38;X6R2P6	O14737;B4DE64;K7EQA1	9;7;6;4;3;3	9;7;6;4;3;3	9;7;6;4;3;3	962140000	975290000	979220000	Programmed cell death protein 5	PDCD5	;;	6	9	9	9	8	9	7	8	9	7	8	9	7	69.6	69.6	69.6	14.285	125	125;129;87;65;40;55	1	133	0	42.604	69.6	69.6	61.6	11649000000	982630000	924180000	818350000	6	7	6	77
O14744-5;O14744;O14744-3;O14744-2;B4DV00;O14744-4;G3V580;H0YJX6;G3V2X6;C9JSX3;G3V5L5;G3V2L6;H0YJ77;H0YJD3;H7BZ44;G3V507;G3V2F5;G3V5T6	O14744-5;O14744;O14744-3;O14744-2;B4DV00;O14744-4	17;17;15;15;13;10;8;7;6;5;4;4;3;3;3;2;2;1	17;17;15;15;13;10;8;7;6;5;4;4;3;3;3;2;2;1	17;17;15;15;13;10;8;7;6;5;4;4;3;3;3;2;2;1	794800000	821710000	788600000	Protein arginine N-methyltransferase 5;Protein arginine N-methyltransferase 5, N-terminally processed;Protein arginine N-methyltransferase 5	PRMT5	;;;;;	18	17	17	17	16	14	13	16	14	13	16	14	13	43.3	43.3	43.3	67.673	593	593;637;576;620;531;466;180;279;185;186;169;183;138;177;179;42;86;104	1	214	0	91.35	39.6	33.4	30.5	9499100000	829850000	841290000	778810000	12	13	14	134
O14745;J3QRP6;B3KY21;J3QRA3	O14745;J3QRP6;B3KY21	14;9;8;1	14;9;8;1	14;9;8;1	769430000	712540000	754680000	Na(+)/H(+) exchange regulatory cofactor NHE-RF1	SLC9A3R1	;;	4	14	14	14	10	10	10	10	10	10	10	10	10	54.5	54.5	54.5	38.868	358	358;215;202;35	1	168	0	101.24	35.8	39.7	39.4	9128700000	898280000	610630000	714840000	8	7	7	99
O14773;O14773-2;E7EV34	O14773;O14773-2	8;7;1	8;7;1	8;7;1	243710000	133800000	173400000	Tripeptidyl-peptidase 1	TPP1	;	3	8	8	8	5	6	5	5	6	5	5	6	5	19.5	19.5	19.5	61.247	563	563;320;177	1	74	0	14.436	12.8	13.3	11.5	2004700000	283820000	130720000	160650000	3	3	3	30
O14776-2;O14776;G3V220	O14776-2;O14776;G3V220	15;15;12	15;15;12	15;15;12	296730000	334910000	323680000	Transcription elongation regulator 1	TCERG1	;;	3	15	15	15	10	13	13	10	13	13	10	13	13	16.4	16.4	16.4	121.69	1077	1077;1098;1032	1	146	0	29.133	10.3	14.5	13.5	3706900000	287120000	377600000	287090000	6	6	6	75
O14787-2;O14787;K7ENW1;K7ESC1	O14787-2;O14787	13;12;3;3	4;4;0;0	4;4;0;0	27288000	0	0	Transportin-2	TNPO2	;	4	13	4	4	10	10	8	2	2	1	2	2	1	15.9	6.3	6.3	100.41	887	887;897;85;109	1	24	0.0051801	2.0028	11.8	9.9	8.2	408840000	24132000	23544000	16982000	1	0	0	3
O14818;O14818-2;H0Y586;O14818-4;Q8TAA3-2;Q8TAA3-5;Q8TAA3;F5GY34	O14818;O14818-2;H0Y586;O14818-4	16;9;8;8;5;5;5;2	16;9;8;8;5;5;5;2	16;9;8;8;5;5;5;2	3110000000	2822400000	3184500000	Proteasome subunit alpha type-7	PSMA7	;;;	8	16	16	16	16	15	14	16	15	14	16	15	14	67.3	67.3	67.3	27.887	248	248;178;187;149;212;250;256;63	1	285	0	214.42	67.3	66.9	67.3	36911000000	3227900000	2662700000	2808400000	18	12	16	191
O14828;O14828-2	O14828	7;3	7;3	7;3	487880000	466280000	589720000	Secretory carrier-associated membrane protein 3	SCAMP3		2	7	7	7	5	7	6	5	7	6	5	7	6	32.6	32.6	32.6	38.287	347	347;321	1	113	0	109.68	28.5	32.6	32.6	6161500000	472650000	394590000	572970000	2	6	2	51
O14879	O14879	25	25	25	5959800000	6073500000	6250200000	Interferon-induced protein with tetratricopeptide repeats 3	IFIT3		1	25	25	25	22	22	23	22	22	23	22	22	23	69	69	69	55.984	490	490	1	434	0	323.31	62.9	65.3	66.9	76941000000	5931900000	6252700000	6322100000	25	22	24	306
O14907	O14907	3	3	3	0	0	64842000	Tax1-binding protein 3	TAX1BP3		1	3	3	3	1	2	2	1	2	2	1	2	2	39.5	39.5	39.5	13.735	124	124	1	16	0	6.5342	11.3	28.2	25	439090000	20903000	20880000	55861000	1	1	0	6
O14908;O14908-2;K7EM11;K7ELJ2;K7ESN1	O14908;O14908-2;K7EM11	8;5;4;1;1	8;5;4;1;1	7;4;3;1;1	278750000	238810000	234740000	PDZ domain-containing protein GIPC1	GIPC1	;;	5	8	8	7	6	6	7	6	6	7	5	5	6	36.9	36.9	33.3	36.049	333	333;236;128;40;159	1	105	0	22.629	24.3	29.7	34.2	3320100000	217590000	213450000	274080000	3	4	1	42
O14929;O14929-2;F8W9G7;F8WEW1	O14929;O14929-2	15;11;3;2	15;11;3;2	15;11;3;2	441740000	431100000	459910000	Histone acetyltransferase type B catalytic subunit	HAT1	;	4	15	15	15	10	11	7	10	11	7	10	11	7	59.7	59.7	59.7	49.512	419	419;334;125;46	1	152	0	133.65	39.6	39.4	24.3	5654700000	420810000	412020000	363020000	5	4	4	90
O14933;O14933-2;E9PQT7;E9PKW8	O14933;O14933-2	6;4;2;1	6;4;2;1	6;4;2;1	258780000	273620000	271000000	Ubiquitin/ISG15-conjugating enzyme E2 L6	UBE2L6	;	4	6	6	6	4	4	4	4	4	4	4	4	4	49	49	49	17.769	153	153;87;127;65	1	94	0	45.832	36.6	31.4	36.6	3393700000	305470000	215100000	257730000	5	2	1	48
O14949	O14949	5	5	5	247400000	227730000	236960000	Cytochrome b-c1 complex subunit 8	UQCRQ		1	5	5	5	5	4	3	5	4	3	5	4	3	54.9	54.9	54.9	9.9062	82	82	1	54	0	8.3832	54.9	42.7	26.8	2815800000	244730000	240010000	172580000	2	2	3	32
O14964;O14964-2;I3L1P5;I3L2H4;I3L165;I3L1E3	O14964;O14964-2;I3L1P5	8;7;5;2;2;2	8;7;5;2;2;2	8;7;5;2;2;2	186730000	187380000	155510000	Hepatocyte growth factor-regulated tyrosine kinase substrate	HGS	;;	6	8	8	8	8	7	7	8	7	7	8	7	7	12	12	12	86.191	777	777;690;263;59;71;292	1	91	0	21.236	12	11.1	11.1	2427800000	215880000	159820000	136970000	3	2	5	46
O14965;Q5QPD4;A3KFJ0	O14965;Q5QPD4;A3KFJ0	2;1;1	2;1;1	2;1;1	28556000	0	0	Aurora kinase A	AURKA	;;	3	2	2	2	1	1	1	1	1	1	1	1	1	7.2	7.2	7.2	45.809	403	403;271;347	1	20	0	7.6576	3.7	3.7	3.7	274790000	16345000	18189000	15015000	1	0	0	3
O14967;D6RAZ4	O14967	11;4	11;4	11;4	206710000	221820000	198140000	Calmegin	CLGN		2	11	11	11	8	7	6	8	7	6	8	7	6	30.7	30.7	30.7	70.038	610	610;179	1	100	0	42.895	22.1	18.5	13.8	2514000000	214100000	182310000	161450000	3	3	2	40
O14974;O14974-4;O14974-5;O14974-3;O14974-2;F8VZN8;H0YHI8;H0YIS3;H0YIS4;H0YIM2;H0YHL8;F8VW28;H0YIL7	O14974;O14974-4;O14974-5;O14974-3;O14974-2;F8VZN8	17;16;15;15;15;11;7;5;5;4;2;1;1	17;16;15;15;15;11;7;5;5;4;2;1;1	17;16;15;15;15;11;7;5;5;4;2;1;1	261400000	240630000	286210000	Protein phosphatase 1 regulatory subunit 12A	PPP1R12A	;;;;;	13	17	17	17	13	13	14	13	13	14	13	13	14	20.6	20.6	20.6	115.28	1030	1030;971;943;974;995;692;367;234;299;188;210;97;161	1	156	0	32.374	17.8	17.6	17.7	3113100000	296510000	269440000	249990000	3	2	4	48
O14976-2;O14976;D6RAW3;H0Y8H5	O14976-2;O14976	6;6;2;1	6;6;2;1	6;6;2;1	31427000	34399000	32124000	Cyclin-G-associated kinase	GAK	;	4	6	6	6	3	3	3	3	3	3	3	3	3	6.7	6.7	6.7	134.46	1232	1232;1311;138;467	1	39	0	10.841	3.3	3	3	406500000	31663000	31493000	27818000	3	0	1	14
O14979-3;O14979-2;O14979	O14979-3;O14979-2;O14979	9;9;8	8;8;7	8;8;7	375400000	423500000	466740000	Heterogeneous nuclear ribonucleoprotein D-like	HNRNPDL	;;	3	9	8	8	8	7	8	7	6	7	7	6	7	40.2	36.9	36.9	27.191	244	244;301;420	1	98	0	64.364	39.8	39.3	32.4	4659800000	396450000	341370000	403930000	6	5	7	61
O14980;C9JKM9;C9J673;C9IZS4;C9JQ02;C9JV99;F8WF71;C9IYM2;H7BZC5;C9JF49	O14980	40;11;9;6;6;6;5;4;4;3	40;11;9;6;6;6;5;4;4;3	40;11;9;6;6;6;5;4;4;3	3518800000	3587300000	3656100000	Exportin-1	XPO1		10	40	40	40	38	37	36	38	37	36	38	37	36	47.2	47.2	47.2	123.38	1071	1071;179;132;94;95;100;82;62;72;59	1	719	0	323.31	44.1	44	40.3	44845000000	3813900000	3574600000	3518600000	40	38	36	484
O14981	O14981	2	2	2	19099000	0	0	TATA-binding protein-associated factor 172	BTAF1		1	2	2	2	2	0	1	2	0	1	2	0	1	1.8	1.8	1.8	206.89	1849	1849	1	13	0	4.8275	1.8	0	0.8	107860000	19663000	0	13729000	1	0	0	4
O15031;E2PU09;A6QRG9;A6QRH1;H0Y7X5;H0Y6J7;H0YAM9;F5H3A2;B4DHQ7;O60486;Q9Y4D7	O15031	32;7;5;2;1;1;1;1;1;1;1	32;7;5;2;1;1;1;1;1;1;1	32;7;5;2;1;1;1;1;1;1;1	510030000	478230000	527500000	Plexin-B2	PLXNB2		11	32	32	32	24	24	23	24	24	23	24	24	23	26.6	26.6	26.6	205.12	1838	1838;477;234;161;84;189;231;307;615;1568;1925	1	321	0	110.74	19.3	19.4	18.2	5930300000	549370000	472700000	383850000	13	14	10	163
O15042-2;O15042;E7ET15;O15042-3;C9JB80;E7EW00;H0Y8D9;U3KPT1;C9JDJ7;C9J5L1;H7C4V2;H7C4P4	O15042-2;O15042;E7ET15;O15042-3;C9JB80	9;9;8;6;5;3;3;2;2;2;2;1	9;9;8;6;5;3;3;2;2;2;2;1	9;9;8;6;5;3;3;2;2;2;2;1	340630000	357570000	424900000	U2 snRNP-associated SURP motif-containing protein	U2SURP	;;;;	12	9	9	9	5	7	6	5	7	6	5	7	6	10.3	10.3	10.3	118.23	1028	1028;1029;1028;620;487;425;439;125;130;161;290;94	1	106	0	19.298	5.3	8.5	7.1	4523900000	286670000	311400000	154340000	3	5	4	49
O15066;H3BTL6;F8WAR6;B7Z896;F8WER6;F5H3M2;F5H4I9;B4DSR5;Q9BVG8-5;O14782;Q9BVG8-2;Q9BVG8;B7Z484;Q9P2E2-3;Q9P2E2	O15066	3;1;1;1;1;1;1;1;1;1;1;1;1;1;1	3;1;1;1;1;1;1;1;1;1;1;1;1;1;1	2;1;1;1;1;1;1;1;1;1;1;1;1;1;1	35143000	0	0	Kinesin-like protein KIF3B;Kinesin-like protein KIF3B, N-terminally processed	KIF3B		15	3	3	2	3	1	2	3	1	2	2	1	2	4.8	4.8	3.1	85.124	747	747;280;672;684;685;724;768;373;687;793;826;833;848;1028;1029	1	17	0.0040399	2.1058	4.8	1.5	3.1	418670000	84797000	55388000	51205000	0	0	0	4
O15067;F5GWT9;H0YGH1;J3KT98;J3QSG0;J3QSH6;J3KTL4;J3KTQ5;J3QL39	O15067;F5GWT9	28;17;4;3;3;3;2;1;1	28;17;4;3;3;3;2;1;1	28;17;4;3;3;3;2;1;1	662570000	702990000	694190000	Phosphoribosylformylglycinamidine synthase	PFAS	;	9	28	28	28	24	19	17	24	19	17	24	19	17	32.1	32.1	32.1	144.73	1338	1338;914;385;116;131;135;103;62;87	1	277	0	160.83	27.5	22	18	8197300000	822460000	597770000	512710000	12	13	5	134
O15084-2;O15084;O15084-4;O15084-1;B4DIW9;H7C4A0;F5H682;H7C209;H7BXV4	O15084-2;O15084;O15084-4;O15084-1;B4DIW9	4;4;4;4;3;1;1;1;1	4;4;4;4;3;1;1;1;1	3;3;3;3;2;0;0;0;0	15171000	0	0	Serine/threonine-protein phosphatase 6 regulatory ankyrin repeat subunit A	ANKRD28	;;;;	9	4	4	3	2	0	0	2	0	0	2	0	0	6.8	6.8	4.7	96.16	899	899;1053;1083;1086;722;316;507;791;919	1	9	0.0022288	2.5725	3.4	0	0	63122000	15356000	0	0	1	0	0	5
O15091-4;O15091-2;O15091;O15091-3	O15091-4;O15091-2;O15091	3;3;3;1	3;3;3;1	3;3;3;1	26371000	31644000	28891000	Mitochondrial ribonuclease P protein 3	KIAA0391	;;	4	3	3	3	2	3	2	2	3	2	2	3	2	7	7	7	56.486	488	488;567;583;211	1	31	0	4.9118	4.7	7	4.1	340080000	22124000	32385000	19159000	1	2	1	15
O15116;E5RJ47;E5RH18	O15116;E5RJ47;E5RH18	2;1;1	2;1;1	2;1;1	91729000	104740000	123610000	U6 snRNA-associated Sm-like protein LSm1	LSM1	;;	3	2	2	2	2	2	2	2	2	2	2	2	2	17.3	17.3	17.3	15.179	133	133;44;44	1	27	0	5.2561	17.3	17.3	17.3	1276600000	93614000	101180000	125930000	1	2	1	13
O15118;K7EQ23;B4DET3	O15118;K7EQ23;B4DET3	11;7;7	11;7;7	11;7;7	463730000	444330000	458990000	Niemann-Pick C1 protein	NPC1	;;	3	11	11	11	11	8	10	11	8	10	11	8	10	11.9	11.9	11.9	142.17	1278	1278;971;960	1	156	0	79.244	11.9	9	11.1	5353100000	392610000	463900000	386590000	6	9	6	84
O15121;E7EMA0	O15121	4;1	4;1	4;1	140950000	123110000	129870000	Sphingolipid delta(4)-desaturase DES1	DEGS1		2	4	4	4	4	4	3	4	4	3	4	4	3	17	17	17	37.866	323	323;261	1	61	0	27.864	17	17	14.9	1679500000	134930000	100680000	145810000	2	2	3	30
O15127;H3BV04;H3BN93;H3BUB6;H3BPL9	O15127;H3BV04;H3BN93;H3BUB6;H3BPL9	2;1;1;1;1	2;1;1;1;1	2;1;1;1;1	60856000	69855000	66472000	Secretory carrier-associated membrane protein 2	SCAMP2	;;;;	5	2	2	2	2	2	2	2	2	2	2	2	2	9.7	9.7	9.7	36.648	329	329;194;236;254;278	1	45	0	16.637	9.7	9.7	9.7	857400000	33868000	75685000	81982000	1	2	2	23
O15143;C9J4Z7;F8VXW2;C9JEY1;C9JQM8;C9JFG9;C9J6C8;C9JBJ7;C9K057;C9JTT6;C9JM51;F8WEB3	O15143	15;6;6;6;6;6;6;5;5;4;1;1	15;6;6;6;6;6;6;5;5;4;1;1	14;6;6;6;6;6;6;5;5;4;1;1	1360400000	1389600000	1342400000	Actin-related protein 2/3 complex subunit 1B	ARPC1B		12	15	15	14	15	14	14	15	14	14	14	13	13	48.7	48.7	42.5	40.949	372	372;128;130;130;132;132;132;102;108;82;21;32	1	280	0	133.33	48.7	48.4	48.4	16921000000	1290800000	1233400000	1283400000	15	19	18	191
O15144;C9JTV5;G5E9J0;H7C3F9;G5E9S7	O15144	17;6;6;4;2	17;6;6;4;2	17;6;6;4;2	1876300000	1499800000	1720400000	Actin-related protein 2/3 complex subunit 2	ARPC2		5	17	17	17	14	14	13	14	14	13	14	14	13	67.7	67.7	67.7	34.333	300	300;89;91;165;38	1	285	0	77.981	51	53	43.7	20376000000	1958500000	1472400000	1577200000	18	13	13	175
O15145;C9JZD1;F8VR50	O15145;C9JZD1	8;4;3	8;4;3	8;4;3	670700000	704020000	617120000	Actin-related protein 2/3 complex subunit 3	ARPC3	;	3	8	8	8	8	5	6	8	5	6	8	5	6	42.7	42.7	42.7	20.546	178	178;99;84	1	122	0	35.487	42.7	30.9	37.1	7998100000	901050000	497810000	444630000	8	4	5	72
O15160-2;O15160;E7EQB9;D6RDJ3;H0Y723	O15160-2;O15160;E7EQB9	5;5;4;2;1	5;5;4;2;1	5;5;4;2;1	52661000	52255000	58640000	DNA-directed RNA polymerases I and III subunit RPAC1	POLR1C	;;	5	5	5	5	3	2	5	3	2	5	3	2	5	24.9	24.9	24.9	38.646	342	342;346;296;124;140	1	46	0	23.655	13.7	7.6	24.9	624310000	42285000	28193000	73614000	1	1	2	13
O15173;O15173-2;U3KQM0;D3DNX8	O15173;O15173-2;U3KQM0	10;10;5;1	10;10;5;1	9;9;4;1	778890000	791550000	785190000	Membrane-associated progesterone receptor component 2	PGRMC2	;;	4	10	10	9	9	9	9	9	9	9	8	8	8	39.5	39.5	39.5	23.818	223	223;247;91;44	1	151	0	113.08	39.5	39.5	39.5	9675900000	816100000	761900000	765340000	6	4	6	81
O15212;A2AB88	O15212;A2AB88	10;7	10;7	10;7	747580000	805550000	820050000	Prefoldin subunit 6	PFDN6	;	2	10	10	10	10	10	10	10	10	10	10	10	10	55	55	55	14.582	129	129;103	1	154	0	78.274	55	55	55	9525900000	795750000	851940000	798730000	8	10	7	91
O15247;A6PVS0	O15247;A6PVS0	6;3	5;2	5;2	0	0	62007000	Chloride intracellular channel protein 2	CLIC2	;	2	6	5	5	2	2	3	1	1	3	1	1	3	32.4	29.1	29.1	28.356	247	247;133	1	18	0	6.5279	7.3	8.5	16.6	271200000	16428000	6395700	57964000	0	0	0	2
O15258;Q5T093;Q5T092;Q5T091	O15258;Q5T093;Q5T092;Q5T091	4;3;3;3	4;3;3;3	4;3;3;3	274600000	314710000	249530000	Protein RER1	RER1	;;;	4	4	4	4	4	4	4	4	4	4	4	4	4	19.4	19.4	19.4	22.958	196	196;117;158;187	1	78	0	15.64	19.4	19.4	19.4	3349300000	350350000	363650000	318970000	5	3	3	43
O15269;O15269-2	O15269	10;3	10;3	10;3	82301000	105790000	87030000	Serine palmitoyltransferase 1	SPTLC1		2	10	10	10	6	4	5	6	4	5	6	4	5	26	26	26	52.743	473	473;143	1	71	0	20.019	16.1	8.9	11.6	1244800000	100690000	57536000	100850000	1	1	1	22
O15270;H0YJV2	O15270	3;1	3;1	3;1	18210000	0	0	Serine palmitoyltransferase 2	SPTLC2		2	3	3	3	2	2	1	2	2	1	2	2	1	7.5	7.5	7.5	62.924	562	562;407	1	20	0	10.338	5.5	5.5	3.2	183180000	18188000	21401000	8863900	1	0	0	6
O15294;O15294-3;O15294-2;O15294-4;C9JZL3;H7C2T7	O15294;O15294-3;O15294-2;O15294-4	17;15;12;9;4;2	17;15;12;9;4;2	17;15;12;9;4;2	260900000	274520000	365320000	UDP-N-acetylglucosamine--peptide N-acetylglucosaminyltransferase 110 kDa subunit	OGT	;;;	6	17	17	17	12	14	11	12	14	11	12	14	11	21.9	21.9	21.9	116.92	1046	1046;1036;920;665;156;211	1	164	0	57.034	16.3	18	13.5	3510200000	301780000	339210000	295060000	3	4	4	41
O15305;H3BRM0;H3BV55;B7Z6R0;H3BR08;H3BM92;H3BV34;H3BT06;H3BNY9;H3BPH4;B7Z419;F5H0W0	O15305;H3BRM0;H3BV55;B7Z6R0;H3BR08;H3BM92;H3BV34;H3BT06;H3BNY9;H3BPH4	4;3;3;3;2;2;2;2;2;2;1;1	4;3;3;3;2;2;2;2;2;2;1;1	4;3;3;3;2;2;2;2;2;2;1;1	157650000	168740000	174090000	Phosphomannomutase 2;Phosphomannomutase	PMM2	;;;;;;;;;	12	4	4	4	3	4	4	3	4	4	3	4	4	22.8	22.8	22.8	28.082	246	246;155;219;119;65;66;70;90;91;142;121;163	1	50	0	24.615	18.3	22.8	22.8	2037100000	111740000	178930000	194600000	3	4	4	43
O15355	O15355	16	16	16	582220000	624950000	589720000	Protein phosphatase 1G	PPM1G		1	16	16	16	14	13	11	14	13	11	14	13	11	43.4	43.4	43.4	59.271	546	546	1	176	0	64.139	39.4	33.2	28.8	7364800000	630290000	632720000	504160000	10	9	7	99
O15357;O15357-2;F5GY16;H7BXR2;F5H588;H0YFZ4;F5GXI6;H0Y5Q9;H7C2V3;H7C292;Q92835-3;Q92835-2;Q92835	O15357;O15357-2	38;33;6;3;1;1;1;1;1;1;1;1;1	38;33;6;3;1;1;1;1;1;1;1;1;1	38;33;6;3;1;1;1;1;1;1;1;1;1	1119100000	1149000000	1146200000	Phosphatidylinositol 3,4,5-trisphosphate 5-phosphatase 2	INPPL1	;	13	38	38	38	29	30	28	29	30	28	29	30	28	38.4	38.4	38.4	138.6	1258	1258;1016;127;149;33;197;596;810;941;941;976;1188;1189	1	453	0	194.53	28.4	29.7	26.7	13567000000	1191200000	1136300000	974280000	16	17	17	222
O15371;B4DVY1;B0QYA5;B0QYA6;B0QYA7;B0QYA4;B0QYA8	O15371;B4DVY1;B0QYA5	20;19;10;5;4;3;3	20;19;10;5;4;3;3	20;19;10;5;4;3;3	1260100000	1242500000	1325500000	Eukaryotic translation initiation factor 3 subunit D	EIF3D	;;	7	20	20	20	14	15	14	14	15	14	14	15	14	60	60	60	63.972	548	548;499;269;173;186;105;123	1	261	0	224.53	38.9	38.9	35.2	15947000000	1227900000	1195400000	1308200000	13	14	15	169
O15382;B3KSI3;M0QXF9;M0QZ10;O15382-2;M0QZP4;M0R2K7	O15382;B3KSI3;M0QXF9;M0QZ10;O15382-2;M0QZP4	12;11;11;10;10;8;2	12;11;11;10;10;8;2	12;11;11;10;10;8;2	217620000	233630000	193430000	Branched-chain-amino-acid aminotransferase, mitochondrial;Branched-chain-amino-acid aminotransferase	BCAT2	;;;;;	7	12	12	12	8	8	9	8	8	9	8	8	9	42.9	42.9	42.9	44.287	392	392;352;445;405;300;313;108	1	123	0	43.707	27.8	28.8	34.7	2591700000	158090000	242650000	194300000	3	2	7	56
O15397;O15397-2;F5H244;F5H2I3;H0YH64	O15397;O15397-2	13;10;3;2;1	12;9;3;2;1	12;9;3;2;1	190210000	180650000	175420000	Importin-8	IPO8	;	5	13	12	12	11	8	7	10	7	6	10	7	6	14.6	13.6	13.6	119.94	1037	1037;832;167;46;167	1	114	0	34.044	12.2	8.9	8.6	1987100000	199130000	124880000	135220000	4	4	2	49
O15400-2;O15400	O15400-2;O15400	4;4	4;4	4;4	105900000	204740000	160610000	Syntaxin-7	STX7	;	2	4	4	4	3	3	2	3	3	2	3	3	2	24.3	24.3	24.3	27.4	239	239;261	1	47	0	10.983	17.6	17.6	12.1	1549200000	101800000	135850000	60301000	0	2	1	9
O15427;J3QQV2;J3QSC3;J3QQS9;J3KTI8;J3KT83;J3QRA0;J3QLE3;J3KTM6;J3QRU2;J3QRP8	O15427;J3QQV2;J3QSC3	11;7;7;5;5;4;4;2;2;2;1	11;7;7;5;5;4;4;2;2;2;1	11;7;7;5;5;4;4;2;2;2;1	1869700000	1988200000	1932600000	Monocarboxylate transporter 4	SLC16A3	;;	11	11	11	11	10	11	11	10	11	11	10	11	11	23.4	23.4	23.4	49.469	465	465;263;291;235;306;219;223;135;157;163;79	1	169	0	40.154	21.7	23.4	23.4	23514000000	1861500000	2077600000	2052800000	7	10	9	92
O15438;O15438-4;O15438-2;O15438-5	O15438;O15438-4;O15438-2	6;6;3;1	6;6;3;1	6;6;3;1	0	41398000	37343000	Canalicular multispecific organic anion transporter 2	ABCC3	;;	4	6	6	6	2	3	4	2	3	4	2	3	4	5.2	5.2	5.2	169.34	1527	1527;1578;1238;572	1	48	0	9.5271	2.2	2.6	3.4	478730000	20405000	45173000	31849000	0	1	1	11
O15460-2;O15460;E7ENX0;E7EPI9;C9JX45;A8MXE0;E7ERI1;C9JCP0;C9JN43;C9JIG4;C9JFJ1	O15460-2;O15460	17;17;5;5;4;4;4;3;2;2;1	17;17;5;5;4;4;4;3;2;2;1	17;17;5;5;4;4;4;3;2;2;1	712200000	704310000	795320000	Prolyl 4-hydroxylase subunit alpha-2	P4HA2	;	11	17	17	17	14	13	12	14	13	12	14	13	12	37	37	37	60.632	533	533;535;204;236;153;167;184;146;101;114;50	1	188	0	38.051	33.4	29.6	27.6	8983900000	858340000	799480000	853920000	11	7	7	87
O15498;B4DR94;H7C3K7	O15498;B4DR94	8;6;1	8;6;1	8;6;1	302670000	266760000	318880000	Synaptobrevin homolog YKT6	YKT6	;	3	8	8	8	7	6	7	7	6	7	7	6	7	51.5	51.5	51.5	22.417	198	198;164;29	1	123	0	49.342	40.4	33.8	42.9	3295500000	216950000	229920000	320180000	4	3	2	41
O15511;B1ALC0;O15511-2	O15511;B1ALC0;O15511-2	6;5;5	6;5;5	5;4;4	411590000	392660000	422940000	Actin-related protein 2/3 complex subunit 5	ARPC5	;;	3	6	6	5	4	3	4	4	3	4	4	2	3	62.3	62.3	57	16.32	151	151;135;154	1	58	0	42.819	52.3	25.8	49	5155600000	464270000	329150000	352310000	3	4	5	41
O43143	O43143	32	32	31	1297600000	1323500000	1259000000	Pre-mRNA-splicing factor ATP-dependent RNA helicase DHX15	DHX15		1	32	32	31	26	25	23	26	25	23	25	24	22	50.2	50.2	49.1	90.932	795	795	1	415	0	161.28	40.6	40.9	37.4	16446000000	1486300000	1011300000	1209100000	24	20	15	247
O43148;O43148-2;K7EP06;K7EPP5;F5H2D9;K7ERH6	O43148;O43148-2;K7EP06	6;6;3;2;2;1	6;6;3;2;2;1	6;6;3;2;2;1	96585000	87481000	93134000	mRNA cap guanine-N7 methyltransferase	RNMT	;;	6	6	6	6	5	5	4	5	5	4	5	5	4	15.8	15.8	15.8	54.843	476	476;504;298;101;234;114	1	68	0	10.366	13.4	14.1	11.8	1099700000	89920000	88414000	60722000	3	3	1	25
O43156	O43156	6	6	6	76985000	70176000	0	TELO2-interacting protein 1 homolog	TTI1		1	6	6	6	5	4	3	5	4	3	5	4	3	6.3	6.3	6.3	122.07	1089	1089	1	55	0	15.293	5.6	3.9	3.8	737340000	79717000	56426000	45239000	2	1	1	13
O43172-2;O43172	O43172-2;O43172	11;11	11;11	11;11	242330000	271880000	245020000	U4/U6 small nuclear ribonucleoprotein Prp4	PRPF4	;	2	11	11	11	7	7	8	7	7	8	7	7	8	29.9	29.9	29.9	58.32	521	521;522	1	100	0	23.489	19.4	19.4	21.5	2805600000	243180000	240360000	239480000	3	4	1	40
O43175;Q5SZU1	O43175;Q5SZU1	16;13	16;13	16;13	1241100000	1430600000	1340700000	D-3-phosphoglycerate dehydrogenase	PHGDH	;	2	16	16	16	12	14	13	12	14	13	12	14	13	37.1	37.1	37.1	56.65	533	533;499	1	238	0	82.951	26.1	32.1	28.9	16779000000	1281300000	1374400000	1182100000	12	12	17	159
O43237;O43237-2;J3KRI4;B4E2E0;E7EPL8;J3KRZ2;H3BUM4	O43237;O43237-2	12;10;5;5;3;2;2	11;10;5;4;2;2;2	11;10;5;4;2;2;2	315590000	357430000	323120000	Cytoplasmic dynein 1 light intermediate chain 2	DYNC1LI2	;	7	12	11	11	8	11	10	7	10	9	7	10	9	37.8	35.2	35.2	54.099	492	492;415;167;271;209;92;186	1	126	0	43.684	30.1	37.6	30.5	4020900000	209680000	392400000	376920000	5	5	3	66
O43242;B4DT72;H0YGV8;F5H8K4	O43242;B4DT72	28;20;4;1	28;20;4;1	28;20;4;1	1473800000	1491400000	1471900000	26S proteasome non-ATPase regulatory subunit 3	PSMD3	;	4	28	28	28	24	21	21	24	21	21	24	21	21	55.1	55.1	55.1	60.977	534	534;356;117;86	1	347	0	155.76	48.9	43.3	45.9	17789000000	1504200000	1518600000	1246300000	12	13	13	176
O43252	O43252	19	19	19	783180000	686290000	675680000	Bifunctional 3-phosphoadenosine 5-phosphosulfate synthase 1;Sulfate adenylyltransferase;Adenylyl-sulfate kinase	PAPSS1		1	19	19	19	17	13	12	17	13	12	17	13	12	45	45	45	70.832	624	624	1	238	0	63.124	39.7	29.2	26	8867800000	850950000	595070000	619630000	9	3	7	85
O43264;A1A528;F5H3C1	O43264;A1A528	9;8;1	9;8;1	9;8;1	79480000	69539000	82705000	Centromere/kinetochore protein zw10 homolog	ZW10	;	3	9	9	9	7	7	7	7	7	7	7	7	7	15	15	15	88.828	779	779;672;135	1	75	0	20.525	11.9	10.7	10.9	966430000	97637000	81616000	98863000	5	4	1	30
O43290;E9PQI8	O43290	5;1	5;1	5;1	42295000	0	61312000	U4/U6.U5 tri-snRNP-associated protein 1	SART1		2	5	5	5	3	3	5	3	3	5	3	3	5	9.1	9.1	9.1	90.254	800	800;164	1	41	0	9.6157	4.8	5.2	9.1	546510000	38596000	36664000	75353000	2	0	1	14
O43292;O43292-2;E9PPZ9;E9PQ31;E9PLV6;E9PM11;E9PLG8;E9PM94	O43292;O43292-2;E9PPZ9;E9PQ31	8;7;4;4;3;2;1;1	8;7;4;4;3;2;1;1	8;7;4;4;3;2;1;1	121060000	126660000	131160000	Glycosylphosphatidylinositol anchor attachment 1 protein	GPAA1	;;;	8	8	8	8	4	6	5	4	6	5	4	6	5	13	13	13	67.622	621	621;561;260;265;234;158;81;98	1	65	0	12.002	6.6	9	8.1	1529500000	95468000	120450000	107980000	0	2	2	18
O43293;O43293-2	O43293;O43293-2	2;1	2;1	2;1	0	0	17178000	Death-associated protein kinase 3	DAPK3	;	2	2	2	2	1	1	2	1	1	2	1	1	2	4.8	4.8	4.8	52.535	454	454;322	1	19	0.0002588	3.132	2	2	4.8	122850000	5224500	4791300	15654000	0	0	2	12
O43294-2;O43294	O43294-2;O43294	2;2	2;2	2;2	2353800	0	0	Transforming growth factor beta-1-induced transcript 1 protein	TGFB1I1	;	2	2	2	2	1	0	0	1	0	0	1	0	0	2.3	2.3	2.3	47.941	444	444;461	1	7	0.0045002	2.0687	2	0	0	18931000	2357300	0	0	0	0	0	5
O43324;D6RBD7;C9J1V9;O43324-2;H0YAL7;D6RCQ0;H0YAH9	O43324;D6RBD7;C9J1V9;O43324-2;H0YAL7	9;7;7;7;6;2;1	9;7;7;7;6;2;1	9;7;7;7;6;2;1	389550000	414220000	433920000	Eukaryotic translation elongation factor 1 epsilon-1	EEF1E1;EEF1E1-BLOC1S5	;;;;	7	9	9	9	7	8	8	7	8	8	7	8	8	60.9	60.9	60.9	19.81	174	174;150;151;139;136;94;56	1	131	0	28.113	48.9	55.7	46.6	5303000000	345560000	281750000	439410000	4	4	6	56
O43390;O43390-2;O43390-3;O43390-4;B4DT28;E7ETM7	O43390;O43390-2;O43390-3;O43390-4;B4DT28;E7ETM7	25;24;22;20;18;14	19;18;17;15;14;10	19;18;17;15;14;10	569710000	592690000	614860000	Heterogeneous nuclear ribonucleoprotein R	HNRNPR	;;;;;	6	25	19	19	20	23	22	14	18	16	14	18	16	47.1	37.8	37.8	70.942	633	633;636;595;535;494;473	1	243	0	72.523	36.5	41.9	40.9	6807200000	629170000	497290000	683880000	12	10	9	104
O43396;K7ER96;G3V1K0;K7EML9;K7EPB7;K7EME7;K7EKG2	O43396;K7ER96;G3V1K0	14;13;8;6;2;2;1	14;13;8;6;2;2;1	14;13;8;6;2;2;1	941720000	895240000	1030800000	Thioredoxin-like protein 1	TXNL1	;;	7	14	14	14	11	11	11	11	11	11	11	11	11	76.8	76.8	76.8	32.251	289	289;281;166;138;69;103;27	1	173	0	113.51	64.4	56.7	61.6	11727000000	942990000	911200000	918410000	12	9	8	118
O43399;O43399-5;O43399-7	O43399;O43399-5;O43399-7	13;13;13	13;13;13	3;3;3	1155200000	1209200000	1178000000	Tumor protein D54	TPD52L2	;;	3	13	13	3	12	12	11	12	12	11	3	3	3	62.6	62.6	13.6	22.237	206	206;220;229	1	196	0	225.08	62.6	62.6	57.3	15276000000	1181000000	1187100000	1135200000	7	10	6	116
O43427-2;O43427;E9PSD3;H0YCE7;E9PJW6	O43427-2;O43427;E9PSD3	5;5;3;2;2	5;5;3;2;2	5;5;3;2;2	35076000	52893000	0	Acidic fibroblast growth factor intracellular-binding protein	FIBP	;;	5	5	5	5	5	3	2	5	3	2	5	3	2	17.4	17.4	17.4	41.21	357	357;364;348;137;146	1	39	0	7.7978	17.4	10.4	6.7	432470000	50416000	34078000	19387000	2	2	0	17
O43432;O43432-3;O43432-4;F5H564;F5H8J4;Q5SWD0	O43432;O43432-3;O43432-4;F5H564;F5H8J4	21;21;18;17;16;1	15;15;12;12;11;1	11;11;11;11;11;1	195750000	213550000	227370000	Eukaryotic translation initiation factor 4 gamma 3	EIF4G3	;;;;	6	21	15	11	13	16	16	7	10	10	5	7	7	15.5	11.9	9.3	176.65	1585	1585;1591;1305;1189;1075;164	1	143	0	28.795	9.7	11.7	11.3	2545500000	187830000	222680000	245520000	3	1	1	31
O43447;C9JQD4;A6NNE7;H0YEL5;A6NM32	O43447;C9JQD4;A6NNE7;H0YEL5	8;7;6;5;2	8;7;6;5;2	8;7;6;5;2	305440000	261180000	283530000	Peptidyl-prolyl cis-trans isomerase H;Peptidyl-prolyl cis-trans isomerase	PPIH	;;;	5	8	8	8	6	8	7	6	8	7	6	8	7	62.1	62.1	62.1	19.208	177	177;144;134;96;57	1	71	0	19.395	34.5	62.1	49.7	3359600000	296620000	259950000	309490000	3	5	3	41
O43464-2;O43464-3;O43464;O43464-4;P83110-2;P83110	O43464-2;O43464-3;O43464;O43464-4	6;6;6;3;1;1	6;6;6;3;1;1	6;6;6;3;1;1	50823000	71318000	67886000	Serine protease HTRA2, mitochondrial	HTRA2	;;;	6	6	6	6	4	4	3	4	4	3	4	4	3	28	28	28	38.493	361	361;436;458;377;357;453	1	42	0	44.993	20.8	16.6	13	725460000	65193000	70293000	58015000	2	1	3	18
O43491;E9PHY5;O43491-4;E9PK52;O43491-3;E9PII3;O43491-2;H0Y5B0;Q6R5J7;E9PMV8;E9PQD2;E9PRG1;E9PIG0;Q6ZSX4;E9PMG5;E9PPC9;E9PJP4;E9PQN0;J3QS55;E9PN54	O43491;E9PHY5;O43491-4;E9PK52;O43491-3;E9PII3;O43491-2	25;24;22;21;19;18;18;9;7;6;4;3;3;3;3;2;1;1;1;1	25;24;22;21;19;18;18;9;7;6;4;3;3;3;3;2;1;1;1;1	23;22;20;19;17;16;16;9;7;6;4;3;3;3;3;2;1;1;0;1	555360000	582970000	561130000	Band 4.1-like protein 2	EPB41L2	;;;;;;	20	25	25	23	20	20	17	20	20	17	18	18	16	33.3	33.3	31.1	112.59	1005	1005;935;852;811;747;706;673;380;383;268;179;153;162;201;224;126;118;127;162;240	1	279	0	81.482	23.6	23.7	21.9	7198700000	587150000	548620000	476270000	10	4	2	99
O43504;R4GMU8;E9PLX3	O43504;R4GMU8;E9PLX3	5;4;4	5;4;4	5;4;4	229680000	263030000	264970000	Ragulator complex protein LAMTOR5	LAMTOR5	;;	3	5	5	5	5	4	4	5	4	4	5	4	4	96.7	96.7	96.7	9.6138	91	91;79;90	1	68	0	191.54	96.7	70.3	70.3	3322800000	294800000	271210000	400910000	6	2	5	43
O43583;F8VVL1	O43583;F8VVL1	7;5	7;5	7;5	83894000	107490000	83886000	Density-regulated protein	DENR	;	2	7	7	7	5	4	3	5	4	3	5	4	3	38.4	38.4	38.4	22.092	198	198;160	1	52	0	16.626	28.3	23.7	17.7	1010600000	98696000	78931000	81563000	2	2	1	22
O43592;F8WDU6;F5GYW6;F5GZM3	O43592	23;8;4;3	23;8;4;3	23;8;4;3	397630000	436520000	428030000	Exportin-T	XPOT		4	23	23	23	19	16	12	19	16	12	19	16	12	33.2	33.2	33.2	109.96	962	962;201;60;228	1	239	0	96.923	27.3	21.5	16.8	4957500000	507090000	353480000	346900000	9	6	6	98
O43615;M0QXU7;M0R301;M0QXM9;M0R124	O43615;M0QXU7	16;10;4;4;2	16;10;4;4;2	16;10;4;4;2	357830000	451140000	382160000	Mitochondrial import inner membrane translocase subunit TIM44	TIMM44	;	5	16	16	16	14	11	13	14	11	13	14	11	13	38.9	38.9	38.9	51.355	452	452;273;126;133;139	1	163	0	32.997	32.5	28.1	31.6	4542700000	410200000	367780000	377150000	4	3	4	39
O43617;O43617-2;A6NKE1	O43617;O43617-2	5;4;2	5;4;2	5;4;2	178940000	198240000	201830000	Trafficking protein particle complex subunit 3	TRAPPC3	;	3	5	5	5	4	5	4	4	5	4	4	5	4	24.4	24.4	24.4	20.274	180	180;134;118	1	57	0	6.8967	20.6	24.4	20.6	2337700000	197770000	286560000	169030000	3	3	2	27
O43633;M0R1T5;M0R1L7;M0QXX8	O43633;M0R1T5;M0R1L7	6;5;4;1	6;5;4;1	6;5;4;1	294900000	292760000	322880000	Charged multivesicular body protein 2a	CHMP2A	;;	4	6	6	6	6	6	6	6	6	6	6	6	6	23.4	23.4	23.4	25.104	222	222;227;159;55	1	57	0	19.015	23.4	23.4	23.4	3160900000	359300000	260930000	302310000	1	2	2	24
O43657	O43657	3	3	3	74690000	77595000	76723000	Tetraspanin-6	TSPAN6		1	3	3	3	2	3	2	2	3	2	2	3	2	15.5	15.5	15.5	27.563	245	245	1	34	0	6.0696	10.2	15.5	10.2	997140000	76495000	87861000	31203000	1	1	1	14
O43674;E7EWP0;H0Y886;O43674-2;F8WDZ2;F8WDD2;H7C568	O43674;E7EWP0;H0Y886;O43674-2;F8WDZ2;F8WDD2	4;3;3;3;2;2;1	4;3;3;3;2;2;1	4;3;3;3;2;2;1	0	291430000	299960000	NADH dehydrogenase [ubiquinone] 1 beta subcomplex subunit 5, mitochondrial	NDUFB5	;;;;;	7	4	4	4	3	2	3	3	2	3	3	2	3	18.5	18.5	18.5	21.75	189	189;177;206;137;42;66;100	1	32	0.00026596	3.464	12.7	8.5	12.7	3457700000	287660000	259090000	276930000	0	1	1	8
O43676;C9JKQ2	O43676;C9JKQ2	2;1	2;1	2;1	41194000	35635000	47759000	NADH dehydrogenase [ubiquinone] 1 beta subcomplex subunit 3	NDUFB3	;	2	2	2	2	2	2	2	2	2	2	2	2	2	21.4	21.4	21.4	11.402	98	98;65	1	25	0	4.624	21.4	21.4	21.4	474200000	39139000	32377000	51948000	1	1	1	17
O43678;O43678-2	O43678;O43678-2	2;1	2;1	2;1	0	0	26059000	NADH dehydrogenase [ubiquinone] 1 alpha subcomplex subunit 2	NDUFA2	;	2	2	2	2	0	1	1	0	1	1	0	1	1	29.3	29.3	29.3	10.921	99	99;76	1	5	0.0076336	1.8421	0	8.1	8.1	71795000	0	22222000	24359000	0	0	1	4
O43681;K7ERW9	O43681	11;5	11;5	11;5	676440000	668640000	723540000	ATPase ASNA1	ASNA1		2	11	11	11	9	10	8	9	10	8	9	10	8	47.7	47.7	47.7	38.792	348	348;200	1	189	0	81.703	41.1	44	31.3	9119100000	684650000	685650000	679690000	8	9	10	125
O43684-2;O43684;J3QT28;B4DDM6;J3QSX4	O43684-2;O43684;J3QT28;B4DDM6	15;15;14;10;7	15;15;14;10;7	15;15;14;10;7	1433800000	1414200000	1611700000	Mitotic checkpoint protein BUB3	BUB3	;;;	5	15	15	15	15	13	13	15	13	13	15	13	13	66.6	66.6	66.6	36.954	326	326;328;278;248;145	1	218	0	103.94	66.6	52.5	50.6	17550000000	1499600000	1338500000	1434500000	12	14	12	139
O43688;O43688-2;K7EMK9;O43688-3;K7ENH4	O43688;O43688-2;K7EMK9;O43688-3	4;4;3;3;1	4;4;3;3;1	4;4;3;3;1	110670000	60770000	0	Lipid phosphate phosphohydrolase 2	PPAP2C	;;;	5	4	4	4	3	3	2	3	3	2	3	3	2	18.1	18.1	18.1	32.573	288	288;309;166;232;136	1	30	0	38.772	13.9	11.1	6.9	1041500000	149040000	58708000	69265000	2	1	0	14
O43707;O43707-2;F5GXS2;O43707-3;K7EP19;D6RH00	O43707;O43707-2;F5GXS2;O43707-3	68;49;39;39;7;1	68;49;39;39;7;1	19;12;12;12;4;0	39175000000	46130000000	42571000000	Alpha-actinin-4	ACTN4	;;;	6	68	68	19	64	63	62	64	63	62	18	18	17	79.1	79.1	24.7	104.85	911	911;692;521;521;105;72	1	1632	0	323.31	79	74.1	74.1	531730000000	42614000000	42700000000	39367000000	121	119	112	1418
O43709;O43709-3;H7C170	O43709;O43709-3;H7C170	3;3;2	3;3;2	3;3;2	59228000	70913000	70175000	Probable 18S rRNA (guanine-N(7))-methyltransferase	WBSCR22	;;	3	3	3	3	3	3	3	3	3	3	3	3	3	16.4	16.4	16.4	31.88	281	281;298;128	1	37	0	7.5196	16.4	16.4	16.4	775760000	59081000	73104000	67681000	1	1	1	19
O43719;Q5H919;Q5H918	O43719	12;5;5	12;5;5	12;5;5	152480000	135140000	153270000	HIV Tat-specific factor 1	HTATSF1		3	12	12	12	7	9	7	7	9	7	7	9	7	24	24	24	85.852	755	755;223;244	1	103	0	54.542	12.3	15.5	10.9	1774200000	134300000	153740000	140330000	2	1	1	31
O43752;O43752-2	O43752;O43752-2	4;2	4;2	4;2	48034000	0	0	Syntaxin-6	STX6	;	2	4	4	4	3	2	2	3	2	2	3	2	2	24.7	24.7	24.7	29.176	255	255;154	1	28	0	9.8864	19.6	10.6	10.6	490360000	48849000	35762000	38788000	2	1	1	10
O43760;Q3KQZ2;K7ELS8;K7ELD9;K7ENG9;K7EJ35	O43760;Q3KQZ2;K7ELS8;K7ELD9;K7ENG9	4;4;3;2;2;1	4;4;3;2;2;1	4;4;3;2;2;1	143670000	107900000	108430000	Synaptogyrin-2	SYNGR2	;;;;	6	4	4	4	4	3	3	4	3	3	4	3	3	16.1	16.1	16.1	24.81	224	224;275;135;65;113;168	1	40	0	5.7733	16.1	12.5	12.5	1392800000	178230000	78179000	74759000	2	2	1	17
O43765;K7EMD6;K7ERW5	O43765;K7EMD6	8;6;1	8;6;1	8;6;1	295410000	262160000	307890000	Small glutamine-rich tetratricopeptide repeat-containing protein alpha	SGTA	;	3	8	8	8	8	7	5	8	7	5	8	7	5	30	30	30	34.063	313	313;162;68	1	99	0	33.499	30	27.2	19.2	3498000000	365720000	218690000	261010000	4	5	4	52
O43772;C9JPE1;B4DWZ5	O43772;C9JPE1;B4DWZ5	5;4;4	5;4;4	5;4;4	50067000	0	0	Mitochondrial carnitine/acylcarnitine carrier protein	SLC25A20	;;	3	5	5	5	2	1	0	2	1	0	2	1	0	20.9	20.9	20.9	32.943	301	301;228;251	1	23	0	5.5415	5.3	2.7	0	399670000	34316000	21258000	0	1	1	0	9
O43809;H3BND3;H3BV41	O43809;H3BND3	12;9;5	12;9;5	12;9;5	1055600000	1079500000	1080700000	Cleavage and polyadenylation specificity factor subunit 5	NUDT21	;	3	12	12	12	11	11	10	11	11	10	11	11	10	54.6	54.6	54.6	26.227	227	227;149;71	1	201	0	71.477	46.3	51.1	42.7	13107000000	1123700000	868680000	943110000	7	7	7	106
O43813;E9PHS0;F8WDS9;H7C2E3	O43813;E9PHS0	12;7;3;3	12;7;3;3	12;7;3;3	222480000	212040000	244930000	LanC-like protein 1	LANCL1	;	4	12	12	12	7	7	6	7	7	6	7	7	6	41.6	41.6	41.6	45.283	399	399;196;82;147	1	91	0	50.692	26.3	24.3	21.1	2902500000	235780000	194030000	218140000	3	3	5	50
O43819;C9JBU1	O43819;C9JBU1	2;1	2;1	2;1	36339000	42824000	49004000	Protein SCO2 homolog, mitochondrial	SCO2	;	2	2	2	2	2	2	2	2	2	2	2	2	2	10.5	10.5	10.5	29.81	266	266;136	1	23	0	3.9459	10.5	10.5	10.5	435350000	33684000	40662000	45198000	2	1	2	11
O43837;O43837-2;O43837-3	O43837;O43837-2	10;9;4	10;9;4	10;9;4	200250000	215060000	168320000	Isocitrate dehydrogenase [NAD] subunit beta, mitochondrial	IDH3B	;	3	10	10	10	8	9	8	8	9	8	8	9	8	32.5	32.5	32.5	42.183	385	385;383;233	1	124	0	24.616	23.9	26.2	26	2473500000	168400000	184110000	158400000	7	6	3	67
O43852;O43852-3;O43852-6;O43852-5;O43852-15;O43852-10;H0Y875;O43852-9;O43852-13;O43852-14;O43852-11;O43852-12	O43852;O43852-3;O43852-6;O43852-5;O43852-15;O43852-10;H0Y875;O43852-9	22;22;16;15;13;13;12;12;9;9;9;4	22;22;16;15;13;13;12;12;9;9;9;4	5;5;5;5;0;5;0;2;5;5;5;0	4207100000	4306400000	4547200000	Calumenin	CALU	;;;;;;;	12	22	22	5	21	20	18	21	20	18	5	5	5	72.4	72.4	13.7	37.106	315	315;323;265;229;164;224;147;154;139;147;170;74	1	455	0	323.31	63.2	70.2	61	56438000000	4627600000	4323500000	3961000000	25	28	19	296
O43852-2;O43852-4;O43852-8;O43852-7	O43852-2;O43852-4;O43852-8	20;20;10;7	3;3;3;3	3;3;3;3	237230000	234130000	236030000	Calumenin	CALU	;;	4	20	3	3	18	17	15	2	2	2	2	2	2	74.3	15.6	15.6	37.134	315	315;323;201;161	1	36	0	17.907	56.5	63.5	54.3	2887700000	247260000	167410000	238640000	1	1	1	17
O43854-2;O43854	O43854-2;O43854	11;11	11;11	11;11	113390000	148220000	147070000	EGF-like repeat and discoidin I-like domain-containing protein 3	EDIL3	;	2	11	11	11	6	7	8	6	7	8	6	7	8	34.5	34.5	34.5	52.747	470	470;480	1	91	0	28.522	20	23.6	26.2	1800400000	128600000	200340000	178530000	5	4	5	48
O43865;O43865-2	O43865;O43865-2	11;9	11;9	6;4	212650000	240600000	212390000	Putative adenosylhomocysteinase 2	AHCYL1	;	2	11	11	6	7	8	8	7	8	8	3	4	4	26.6	26.6	16.4	58.951	530	530;483	1	102	0	29.235	14.3	17.4	17.4	2686600000	178480000	202920000	233300000	2	3	3	44
O43924;B8ZZK5;C9IZ52	O43924;B8ZZK5;C9IZ52	3;2;2	3;2;2	3;2;2	73788000	0	70016000	Retinal rod rhodopsin-sensitive cGMP 3,5-cyclic phosphodiesterase subunit delta	PDE6D	;;	3	3	3	3	2	1	2	2	1	2	2	1	2	28.7	28.7	28.7	17.42	150	150;93;104	1	19	0	4.8521	20.7	12.7	20.7	690900000	76711000	43080000	64956000	0	1	0	7
O43929;O43929-2;O43929-3;B7Z632;C9JGH7;C9J2X8;Q53SE3;Q5THS9;Q96NJ5-3;Q96NJ5-2;Q96NJ5	O43929;O43929-2;O43929-3	7;5;5;3;2;2;2;1;1;1;1	7;5;5;3;2;2;2;1;1;1;1	5;3;3;2;2;2;2;1;1;1;1	33459000	32014000	34459000	Origin recognition complex subunit 4	ORC4	;;	11	7	7	5	3	5	4	3	5	4	2	3	2	20.4	20.4	15.1	50.377	436	436;352;362;219;127;128;145;176;551;584;620	1	50	0	9.0642	7.3	14.2	11.7	465760000	25036000	47567000	30725000	1	1	1	19
O60216;E5RJW1;E5RJK5;E5RFV8;E5RIN7;Q9H4I0;E5RG18;E5RI01;E5RFZ5;Q9H4I0-2	O60216	5;2;2;2;2;2;1;1;1;1	5;2;2;2;2;2;1;1;1;1	5;2;2;2;2;2;1;1;1;1	29755000	37125000	33438000	Double-strand-break repair protein rad21 homolog	RAD21		10	5	5	5	3	3	3	3	3	3	3	3	3	9	9	9	71.689	631	631;120;124;225;228;556;69;135;176;521	1	38	0	7.0025	5.1	5.1	5.1	403270000	29560000	31539000	31735000	1	2	1	22
O60220	O60220	4	4	4	121690000	102230000	106590000	Mitochondrial import inner membrane translocase subunit Tim8 A	TIMM8A		1	4	4	4	4	3	4	4	3	4	4	3	4	68	68	68	10.998	97	97	1	49	0	35.473	68	38.1	68	1499900000	146940000	104680000	155830000	3	3	2	30
O60231;Q5SQH5;A2AB15	O60231	13;6;1	12;6;1	12;6;1	251250000	206920000	230260000	Putative pre-mRNA-splicing factor ATP-dependent RNA helicase DHX16	DHX16		3	13	12	12	12	11	10	11	10	9	11	10	9	17	16.1	16.1	119.26	1041	1041;560;295	1	135	0	40.918	15.9	14.4	13.5	2668500000	195300000	555030000	152940000	5	5	5	63
O60256;O60256-3;O60256-2;E7EPA1;O60256-4;C9K0K7;I3L0S1;C9JJS3;C9JDU5;I3L331;I3L164;C9JDH0;E7EW35;I3L4G9;I3L1T1;I3L3B8;I3L2J4	O60256;O60256-3;O60256-2;E7EPA1;O60256-4;C9K0K7;I3L0S1;C9JJS3	14;11;11;10;10;9;9;8;6;4;4;4;4;3;1;1;1	14;11;11;10;10;9;9;8;6;4;4;4;4;3;1;1;1	12;9;9;8;8;8;7;7;6;4;4;4;4;2;1;1;1	279340000	299380000	288160000	Phosphoribosyl pyrophosphate synthase-associated protein 2	PRPSAP2	;;;;;;;	17	14	14	12	12	8	9	12	8	9	10	7	7	55.3	55.3	49.6	40.925	369	369;320;329;268;283;244;260;194;176;93;104;140;161;143;47;57;78	1	155	0	46.165	46.3	29.3	33.6	3746500000	375210000	239990000	288510000	4	2	2	53
O60264;P28370-2;P28370	O60264	6;2;2	6;2;2	6;2;2	32681000	49110000	43840000	SWI/SNF-related matrix-associated actin-dependent regulator of chromatin subfamily A member 5	SMARCA5		3	6	6	6	4	3	3	4	3	3	4	3	3	6	6	6	121.9	1052	1052;1042;1054	1	42	0	8.8758	4.2	2.8	2.9	515020000	37318000	51853000	37837000	0	1	0	10
O60271-4;O60271-2;O60271;O60271-5;O60271-3;O60271-9;H0YBE9;H0YBS5;E9PFH7;Q9UPT6;Q9UPT6-2;H0Y981;D6RHI8	O60271-4;O60271-2;O60271;O60271-5;O60271-3;O60271-9	28;28;27;22;21;21;3;3;3;3;2;1;1	28;28;27;22;21;21;3;3;3;3;2;1;1	28;28;27;22;21;21;3;3;3;3;2;1;1	629570000	645260000	666920000	C-Jun-amino-terminal kinase-interacting protein 4	SPAG9	;;;;;	13	28	28	28	21	24	19	21	24	19	21	24	19	29.3	29.3	29.3	144.68	1307	1307;1311;1321;931;945;1177;174;250;1330;1336;250;152;156	1	311	0	148.94	23	25.3	20.7	7672800000	617580000	659750000	557710000	10	12	12	140
O60306;H0YH15	O60306	10;4	10;4	10;4	52985000	58150000	75353000	Intron-binding protein aquarius	AQR		2	10	10	10	5	5	6	5	5	6	5	5	6	10	10	10	171.29	1485	1485;646	1	67	0	24.764	4.5	4.8	5.7	770290000	56223000	56031000	74525000	3	3	3	32
O60333-2;O60333-3;O60333;O60333-4	O60333-2;O60333-3;O60333;O60333-4	2;1;1;1	2;1;1;1	2;1;1;1	28235000	91405000	0	Kinesin-like protein KIF1B	KIF1B	;;;	4	2	2	2	2	2	1	2	2	1	2	2	1	1.1	1.1	1.1	199.26	1770	1770;1153;1816;1823	1	17	0.0078595	1.8382	1.1	1.1	0.5	422020000	24716000	93438000	11660000	1	1	0	3
O60343;O60343-2;O60343-3;O60343-4;O60343-5;Q5JU47	O60343;O60343-2;O60343-3	12;11;11;5;5;2	12;11;11;5;5;2	12;11;11;5;5;2	110420000	97532000	124210000	TBC1 domain family member 4	TBC1D4	;;	6	12	12	12	7	4	5	7	4	5	7	4	5	10.8	10.8	10.8	146.56	1298	1298;1235;1290;462;515;282	1	77	0	19.097	6.2	3.5	4.4	1449600000	145410000	107840000	69326000	5	1	2	27
O60427;O60427-2;F5H8G5;F5H3P6;F5H3U5;H7C2V0	O60427;O60427-2	4;2;1;1;1;1	4;2;1;1;1;1	4;2;1;1;1;1	60894000	0	54802000	Fatty acid desaturase 1	FADS1	;	6	4	4	4	4	1	3	4	1	3	4	1	3	12.8	12.8	12.8	51.964	444	444;360;124;146;192;228	1	33	0	14.179	12.8	3.8	11	602010000	71595000	18880000	63992000	3	1	1	24
O60443;O60443-3;H7C3W1;O60443-2;H7C147;H7BZJ0	O60443;O60443-3	12;7;5;4;3;2	12;7;5;4;3;2	12;7;5;4;3;2	182500000	151590000	175160000	Non-syndromic hearing impairment protein 5	DFNA5	;	6	12	12	12	6	8	8	6	8	8	6	8	8	31	31	31	54.554	496	496;332;216;101;192;155	1	110	0	33.086	18.3	21.4	23.6	1971800000	127760000	143020000	167750000	4	5	5	54
O60488-2;O60488;D6RF95;H0Y9A0;D6RD96;D6RFW9;D6RDA8	O60488-2;O60488	24;24;8;7;6;5;5	22;22;8;7;6;5;5	22;22;8;7;6;5;5	437260000	462060000	475280000	Long-chain-fatty-acid--CoA ligase 4	ACSL4	;	7	24	22	22	13	17	14	11	15	12	11	15	12	46.1	41.8	41.8	74.435	670	670;711;154;156;145;126;128	1	203	0	90.033	27.9	35.1	28.4	5934900000	376450000	453340000	320640000	7	9	6	103
O60493;O60493-2;O60493-4;O60493-3	O60493;O60493-2;O60493-4	9;8;7;4	9;8;7;4	9;8;7;4	620710000	663650000	744290000	Sorting nexin-3	SNX3	;;	4	9	9	9	9	7	8	9	7	8	9	7	8	69.8	69.8	69.8	18.762	162	162;130;140;113	1	116	0	31.195	69.8	41.4	61.7	8669600000	666720000	584340000	673500000	6	6	3	74
O60502-4;O60502;O60502-2;O60502-3;H7C3X0;B4DYV7	O60502-4;O60502;O60502-2;O60502-3	16;16;15;11;7;3	16;16;15;11;7;3	16;16;15;11;7;3	194860000	206720000	220120000	Protein O-GlcNAcase	MGEA5	;;;	6	16	16	16	10	9	9	10	9	9	10	9	9	25.6	25.6	25.6	96.931	863	863;916;849;677;256;151	1	117	0	24.451	16.2	12.9	15.1	2630000000	220620000	226080000	204760000	2	3	3	36
O60506;O60506-2;O60506-3;O60506-4;O60506-5;F6UXX1	O60506;O60506-2;O60506-3;O60506-4;O60506-5	27;26;25;24;17;9	27;26;25;24;17;9	21;20;20;19;14;7	3743000000	4046600000	4251500000	Heterogeneous nuclear ribonucleoprotein Q	SYNCRIP	;;;;	6	27	27	21	24	24	24	24	24	24	18	19	18	48.2	48.2	38.7	69.602	623	623;588;562;527;410;185	1	471	0	300.44	42.7	41.3	38.8	47220000000	3769200000	3814100000	4094100000	27	24	27	329
O60518	O60518	13	11	11	77712000	82103000	75098000	Ran-binding protein 6	RANBP6		1	13	11	11	9	7	5	8	5	3	8	5	3	15	13.3	13.3	124.71	1105	1105	1	74	0	47.036	10.3	7.8	5.6	1018400000	120690000	55476000	26739000	5	1	1	29
O60547;O60547-2	O60547;O60547-2	7;6	7;6	7;6	159650000	152500000	152370000	GDP-mannose 4,6 dehydratase	GMDS	;	2	7	7	7	6	5	5	6	5	5	6	5	5	23.7	23.7	23.7	41.949	372	372;342	1	103	0	20.818	21.5	18.5	16.4	2089400000	199240000	163440000	151640000	6	5	3	46
O60563;O60563-2	O60563	5;1	5;1	5;1	29754000	0	0	Cyclin-T1	CCNT1		2	5	5	5	4	3	3	4	3	3	4	3	3	7.9	7.9	7.9	80.684	726	726;184	1	42	0	4.5107	6.7	5.5	3.9	498870000	37060000	23576000	87420000	1	0	0	10
O60566;O60566-3;O60566-2	O60566;O60566-3;O60566-2	4;4;2	4;4;2	4;4;2	66528000	0	0	Mitotic checkpoint serine/threonine-protein kinase BUB1 beta	BUB1B	;;	3	4	4	4	2	0	1	2	0	1	2	0	1	4.8	4.8	4.8	119.54	1050	1050;1064;933	1	16	0	5.5804	2.8	0	2.1	373600000	19075000	0	11402000	2	0	1	9
O60568;H7C2V1;H7C2S8;H7C0B8;C9JU11;C9JIX5;H7C2A8	O60568	29;11;9;4;2;1;1	29;11;9;4;2;1;1	29;11;9;4;2;1;1	1242900000	1211200000	1232000000	Procollagen-lysine,2-oxoglutarate 5-dioxygenase 3	PLOD3		7	29	29	29	26	26	23	26	26	23	26	26	23	52	52	52	84.784	738	738;270;264;66;171;75;125	1	423	0	133.5	46.2	47.4	37.9	14760000000	1249900000	1176600000	1178800000	19	21	17	246
O60573;C9JEL3;B9A044;B8ZZ50;O60573-2;B8ZZL3;B4E1E4;B9A023	O60573;C9JEL3;B9A044;B8ZZ50;O60573-2;B8ZZL3	6;5;5;5;5;3;2;2	6;5;5;5;5;3;2;2	6;5;5;5;5;3;2;2	98308000	117110000	93610000	Eukaryotic translation initiation factor 4E type 2	EIF4E2	;;;;;	8	6	6	6	4	5	5	4	5	5	4	5	5	35.5	35.5	35.5	28.362	245	245;213;233;236;234;200;188;189	1	56	0	13.924	26.1	31.4	31.4	1246800000	86852000	115750000	108410000	2	2	1	18
O60637-3;O60637;H0YKJ9;O60637-2;H0YMH8	O60637-3;O60637;H0YKJ9;O60637-2	4;4;2;2;1	4;4;2;2;1	4;4;2;2;1	192670000	268720000	211320000	Tetraspanin-3	TSPAN3	;;;	5	4	4	4	4	4	3	4	4	3	4	4	3	16.9	16.9	16.9	21.183	189	189;253;164;228;45	1	43	0	5.3646	16.9	16.9	8.5	2859500000	274650000	283720000	238660000	2	2	2	22
O60645-2;O60645-3;O60645;D6RB59;H0Y995;D6RBR9	O60645-2;O60645-3;O60645;D6RB59	13;13;13;9;4;2	13;13;13;9;4;2	13;13;13;9;4;2	140570000	148970000	138570000	Exocyst complex component 3	EXOC3	;;;	6	13	13	13	9	7	7	9	7	7	9	7	7	26.2	26.2	26.2	73.796	641	641;745;756;462;473;68	1	114	0	48.575	18.4	13.1	13.1	1938300000	136660000	102950000	110430000	3	1	1	35
O60664-4;O60664;O60664-3;K7ERZ3;O60664-2;K7EL96;K7ER39	O60664-4;O60664;O60664-3;K7ERZ3;O60664-2	23;23;21;15;12;10;7	23;23;21;15;12;10;7	23;23;21;15;12;10;7	2857900000	2935900000	2978200000	Perilipin-3	PLIN3	;;;;	7	23	23	23	21	19	17	21	19	17	21	19	17	69.2	69.2	69.2	45.803	422	422;434;433;292;251;172;168	1	422	0	323.31	64	63.3	57.8	38379000000	3578100000	2770500000	2688200000	27	18	18	254
O60671-2;O60671;D6R9A1;O60671-3	O60671-2;O60671	4;4;1;1	4;4;1;1	4;4;1;1	51353000	50175000	0	Cell cycle checkpoint protein RAD1	RAD1	;	4	4	4	4	3	2	1	3	2	1	3	2	1	24	24	24	27.827	246	246;282;84;68	1	29	0	23.946	17.5	13.4	3.7	489330000	51165000	41995000	16743000	2	2	0	16
O60701;O60701-2;O60701-3;E7ER83;E7ETF4;E7EV97;E7ER95;D6RHF4;E9PBD2	O60701;O60701-2;O60701-3	23;20;19;5;5;5;3;1;1	23;20;19;5;5;5;3;1;1	23;20;19;5;5;5;3;1;1	2955100000	3077900000	3043600000	UDP-glucose 6-dehydrogenase	UGDH	;;	9	23	23	23	21	20	21	21	20	21	21	20	21	55.9	55.9	55.9	55.023	494	494;427;397;130;153;181;84;53;55	1	340	0	323.31	54.3	50.6	54.3	37053000000	2899800000	2751400000	2797100000	22	19	21	262
O60749;O60749-2;D6RC15	O60749;O60749-2	13;12;3	11;10;3	11;10;3	461370000	510890000	514240000	Sorting nexin-2	SNX2	;	3	13	11	11	12	11	11	10	9	9	10	9	9	29.5	25.4	25.4	58.47	519	519;402;265	1	146	0	65.592	27.4	25	25	6242300000	487710000	438090000	477210000	5	6	4	78
O60784;E7EPD0;O60784-2;O60784-4;O60784-3;B0QY01;B3KUU1;V9GYF4;B0QY02;V9GZ68;H7BYN7;F8WB30;F8WAW7;F8WE29;F8WBB0	O60784;E7EPD0;O60784-2;O60784-4;O60784-3	15;14;14;13;12;7;6;5;5;3;3;1;1;1;1	15;14;14;13;12;7;6;5;5;3;3;1;1;1;1	15;14;14;13;12;7;6;5;5;3;3;1;1;1;1	275080000	281030000	277460000	Target of Myb protein 1	TOM1	;;;;	15	15	15	15	10	7	9	10	7	9	10	7	9	44.5	44.5	44.5	53.818	492	492;454;493;460;447;334;265;134;151;125;133;25;69;83;97	1	126	0	98.858	31.9	18.7	27.4	3547400000	298530000	217070000	318510000	9	2	3	72
O60826	O60826	13	13	13	101690000	118680000	116600000	Coiled-coil domain-containing protein 22	CCDC22		1	13	13	13	8	7	5	8	7	5	8	7	5	31.9	31.9	31.9	70.755	627	627	1	113	0	53.202	19.5	15.5	13.7	1552600000	113190000	111090000	77781000	3	3	2	52
O60828-2;O60828;O60828-5;O60828-4;H7C053;C9JQA1;O60828-6;O60828-3;O60828-10;O60828-9;O60828-8;O60828-7	O60828-2;O60828;O60828-5;O60828-4;H7C053;C9JQA1;O60828-6;O60828-3	4;4;3;3;2;2;2;2;1;1;1;1	4;4;3;3;2;2;2;2;1;1;1;1	4;4;3;3;2;2;2;2;1;1;1;1	0	88377000	116770000	Polyglutamine-binding protein 1	PQBP1	;;;;;;;	12	4	4	4	2	2	3	2	2	3	2	2	3	20.5	20.5	20.5	30.401	264	264;265;165;170;150;213;149;224;60;67;73;128	1	28	0	11.38	8	10.2	15.9	1064200000	62556000	64615000	112210000	2	1	2	18
O60832;H7BZF2;H7C0M1;C9IYT0;O60832-2	O60832;H7BZF2;H7C0M1;C9IYT0;O60832-2	3;2;2;2;2	3;2;2;2;2	3;2;2;2;2	0	31910000	0	H/ACA ribonucleoprotein complex subunit 4	DKC1	;;;;	5	3	3	3	2	3	1	2	3	1	2	3	1	9.9	9.9	9.9	57.673	514	514;76;229;258;420	1	24	0	4.8794	6	9.9	2.5	352950000	24641000	37421000	20905000	0	1	1	9
O60841	O60841	38	38	38	1269900000	1361100000	1339300000	Eukaryotic translation initiation factor 5B	EIF5B		1	38	38	38	33	31	28	33	31	28	33	31	28	37.7	37.7	37.7	138.83	1220	1220	1	400	0	174.34	34.6	32.4	29.8	16159000000	1400800000	1262100000	1227100000	23	18	15	201
O60869-2;O60869-3;O60869	O60869-2;O60869-3;O60869	10;10;10	10;10;10	10;10;10	919640000	960260000	1009300000	Endothelial differentiation-related factor 1	EDF1	;;	3	10	10	10	9	8	9	9	8	9	9	8	9	59.7	59.7	59.7	15.48	139	139;141;148	1	156	0	36.612	54.7	48.2	57.6	11809000000	879740000	807890000	895510000	9	8	10	113
O60884;I3L320;H3BMW5	O60884	12;2;1	12;2;1	12;2;1	475730000	490710000	426260000	DnaJ homolog subfamily A member 2	DNAJA2		3	12	12	12	10	10	11	10	10	11	10	10	11	36.7	36.7	36.7	45.745	412	412;47;134	1	131	0	46.444	32.3	30.8	34.2	5652300000	522020000	345250000	478930000	5	3	8	61
O60885;M0QZD9;O60885-2;O60885-3	O60885	5;2;2;2	5;2;2;2	3;0;0;0	35340000	0	38843000	Bromodomain-containing protein 4	BRD4		4	5	5	3	4	2	3	4	2	3	3	2	3	3.8	3.8	2.5	152.22	1362	1362;572;722;794	1	45	0.00026151	3.2552	3.2	1.8	2.5	439960000	47220000	18494000	27372000	0	0	1	8
O60888-3;O60888;O60888-2;C9IZG4;C9IZQ5	O60888-3;O60888;O60888-2;C9IZG4	5;5;5;3;1	5;5;5;3;1	5;5;5;3;1	517260000	487900000	455490000	Protein CutA	CUTA	;;;	5	5	5	5	3	3	4	3	3	4	3	3	4	55.8	55.8	55.8	16.832	156	156;179;198;135;155	1	71	0	158.79	29.5	29.5	38.5	5841000000	451190000	396230000	322520000	9	5	6	76
O60925;E5RGS4;D6RGG5	O60925;E5RGS4	8;7;1	8;7;1	8;7;1	622920000	619770000	618190000	Prefoldin subunit 1	PFDN1	;	3	8	8	8	8	6	7	8	6	7	8	6	7	68	68	68	14.21	122	122;117;35	1	125	0	59.954	68	42.6	62.3	7618500000	739170000	481200000	512920000	7	4	8	69
O60927	O60927	3	3	3	43882000	0	0	Protein phosphatase 1 regulatory subunit 11	PPP1R11		1	3	3	3	2	1	1	2	1	1	2	1	1	32.5	32.5	32.5	13.952	126	126	1	17	0	26.074	32.5	12.7	12.7	303530000	42651000	13556000	22221000	2	0	1	12
O75044;H0Y4C3;H0Y2P8;Q5VZB4;P0DJJ0;H0Y582;E9PDX4	O75044;H0Y4C3;H0Y2P8;Q5VZB4	8;7;7;4;3;1;1	8;7;7;4;3;1;1	7;6;6;3;3;1;1	49912000	56319000	52648000	SLIT-ROBO Rho GTPase-activating protein 2	SRGAP2	;;;	7	8	8	7	3	4	4	3	4	4	2	3	3	10.5	10.5	9.3	120.88	1071	1071;931;985;450;459;230;252	1	48	0	15.884	4.9	3.5	5	640820000	38475000	50194000	54003000	2	2	1	19
O75063	O75063	2	2	2	14585000	0	0	Glycosaminoglycan xylosylkinase	FAM20B		1	2	2	2	2	0	1	2	0	1	2	0	1	7.8	7.8	7.8	46.432	409	409	1	13	0.00026233	3.3005	7.8	0	2.2	110160000	14606000	0	9472800	0	0	0	3
O75083;O75083-3;D6RD66	O75083;O75083-3	33;20;16	33;20;16	33;20;16	5265100000	4765600000	5231300000	WD repeat-containing protein 1	WDR1	;	3	33	33	33	29	28	30	29	28	30	29	28	30	68.6	68.6	68.6	66.193	606	606;466;245	1	622	0	323.31	66.2	66	67.2	63302000000	5506800000	4515300000	5878900000	43	35	38	453
O75116;E9PF63;D6REE7;C9JFJ0	O75116;E9PF63	28;26;3;1	28;26;3;1	26;24;3;1	475700000	447250000	495500000	Rho-associated protein kinase 2	ROCK2	;	4	28	28	26	21	18	22	21	18	22	19	17	21	24.7	24.7	23	160.9	1388	1388;1145;446;203	1	250	0	146.65	19	15.9	18	5501100000	484260000	394370000	517740000	10	9	13	124
O75131;E5RG68;H0YB26;E5RHZ0;E5RJ85;E5RG97;E5RFT7;Q7Z6C8;Q8IYJ1;Q96A23;O95741;Q9UBL6-2;Q96A23-2;Q9HCH3;O95741-2;Q9UBL6	O75131;E5RG68;H0YB26	14;9;7;6;5;3;2;1;1;1;1;1;1;1;1;1	14;9;7;6;5;3;2;1;1;1;1;1;1;1;1;1	13;9;7;6;5;3;2;0;0;0;0;0;0;0;0;0	385430000	398550000	406770000	Copine-3	CPNE3	;;	16	14	14	13	13	9	8	13	9	8	12	8	7	34.1	34.1	32.4	60.13	537	537;234;262;153;139;135;79;301;553;557;557;558;575;593;612;633	1	131	0	29.923	29.6	20.3	16.8	4991400000	595370000	333120000	285120000	8	6	3	69
O75146;O75146-2;H0YH66	O75146;O75146-2	12;6;2	12;6;2	12;6;2	107460000	132990000	123410000	Huntingtin-interacting protein 1-related protein	HIP1R	;	3	12	12	12	10	10	9	10	10	9	10	10	9	14.5	14.5	14.5	119.39	1068	1068;615;197	1	105	0	21.846	12.2	12.5	10.5	1415800000	128120000	121250000	98813000	3	4	1	29
O75165;H0Y8Q2	O75165	12;4	12;4	12;4	68613000	51025000	59195000	DnaJ homolog subfamily C member 13	DNAJC13		2	12	12	12	8	6	6	8	6	6	8	6	6	7.2	7.2	7.2	254.41	2243	2243;173	1	90	0	16.796	5.1	3.8	3.4	778910000	77776000	49538000	47706000	3	1	2	28
O75170-6;O75170-2;O75170-4;O75170-3;O75170-5;O75170;T1ECW5	O75170-6;O75170-2;O75170-4;O75170-3;O75170-5;O75170;T1ECW5	2;2;2;2;2;2;1	2;2;2;2;2;2;1	2;2;2;2;2;2;1	129090000	127320000	156560000	Serine/threonine-protein phosphatase 6 regulatory subunit 2	PPP6R2	;;;;;;	7	2	2	2	1	1	2	1	1	2	1	1	2	2.2	2.2	2.2	98.125	905	905;927;932;933;959;966;685	1	34	0	5.9749	1.4	1.4	2.2	1521900000	31253000	24586000	287120000	3	1	2	21
O75223;M0QZK8;B8ZZK2;O75223-3;O75223-2;O75223-4;H7BZK5	O75223;M0QZK8;B8ZZK2;O75223-3	9;5;5;5;4;4;3	9;5;5;5;4;4;3	9;5;5;5;4;4;3	253890000	302970000	259580000	Gamma-glutamylcyclotransferase	GGCT	;;;	7	9	9	9	8	6	6	8	6	6	8	6	6	66	66	66	21.007	188	188;103;166;94;114;166;119	1	89	0	35.366	61.2	34	34	3290800000	207890000	261550000	225400000	4	5	2	57
O75306-2;O75306;B7Z9L2	O75306-2;O75306;B7Z9L2	11;11;7	11;11;7	11;11;7	210690000	258080000	215580000	NADH dehydrogenase [ubiquinone] iron-sulfur protein 2, mitochondrial	NDUFS2	;;	3	11	11	11	10	9	9	10	9	9	10	9	9	30	30	30	51.851	457	457;463;231	1	117	0	35.373	25.8	22.8	22.8	2675200000	263330000	228210000	234870000	2	5	5	42
O75340;O75340-2;H0Y9X3;E7EPW6;O75340-3;D6RA21;Q86W51	O75340;O75340-2	9;8;3;2;2;1;1	9;8;3;2;2;1;1	9;8;3;2;2;1;1	1228900000	1303100000	1254500000	Programmed cell death protein 6	PDCD6	;	7	9	9	9	7	7	6	7	7	6	7	7	6	70.2	70.2	70.2	21.868	191	191;189;104;73;69;39;55	1	113	0	89.184	47.1	47.1	33	16707000000	1276500000	1238000000	1062800000	3	6	6	75
O75348;F2Z307;O95670-2;O95670	O75348	6;1;1;1	6;1;1;1	6;1;1;1	95682000	151790000	146990000	V-type proton ATPase subunit G 1	ATP6V1G1		4	6	6	6	6	2	4	6	2	4	6	2	4	48.3	48.3	48.3	13.757	118	118;99;78;118	1	54	0	72.158	48.3	16.9	37.3	1624900000	143070000	49131000	144700000	0	2	1	17
O75351;Q6PIW4-2;Q6PIW4	O75351	13;1;1	13;1;1	10;0;0	257800000	260710000	234160000	Vacuolar protein sorting-associated protein 4B	VPS4B		3	13	13	10	11	8	10	11	8	10	8	6	7	39	39	32.4	49.301	444	444;563;674	1	137	0	27.124	32.4	23.4	29.1	3245800000	243890000	259280000	272460000	2	2	4	51
O75367-2;O75367-3;O75367;D6RCF2;Q9P0M6	O75367-2;O75367-3;O75367;D6RCF2;Q9P0M6	2;2;2;1;1	2;2;2;1;1	2;2;2;1;1	0	9638100	0	Core histone macro-H2A.1;Histone H2A;Core histone macro-H2A.2	H2AFY;H2AFY2	;;;;	5	2	2	2	0	2	0	0	2	0	0	2	0	10.6	10.6	10.6	39.183	369	369;371;372;165;372	1	5	0	8.8668	0	10.6	0	27524000	0	9009800	0	0	1	0	3
O75368	O75368	8	8	8	506560000	532060000	507580000	SH3 domain-binding glutamic acid-rich-like protein	SH3BGRL		1	8	8	8	6	7	6	6	7	6	6	7	6	78.1	78.1	78.1	12.774	114	114	1	103	0	20.953	62.3	62.3	78.1	6699000000	520070000	523900000	493020000	4	5	5	69
O75369-8;O75369-2;O75369-9;O75369;O75369-6;O75369-3;E7EN95;O75369-7;O75369-5;O75369-4;H7C5L4;Q8WXT3	O75369-8;O75369-2;O75369-9;O75369;O75369-6;O75369-3;E7EN95;O75369-7;O75369-5;O75369-4	152;150;150;150;147;147;137;137;121;121;6;2	152;150;150;150;147;147;137;137;121;121;6;2	138;136;136;136;133;133;131;131;109;109;5;2	29455000000	29617000000	30675000000	Filamin-B	FLNB	;;;;;;;;;	12	152	152	138	141	139	134	141	139	134	129	125	122	77.2	77.2	73	281.63	2633	2633;2578;2591;2602;2537;2561;2409;2422;2146;2150;135;72	1	2741	0	323.31	73.2	70.6	68.7	361230000000	31575000000	28883000000	28495000000	174	154	155	1986
O75376-2;O75376;O75376-3;E7EVU5;E7EW50;J3KS51	O75376-2;O75376;O75376-3	3;3;2;1;1;1	3;3;2;1;1;1	3;3;2;1;1;1	54266000	0	0	Nuclear receptor corepressor 1	NCOR1	;;	6	3	3	3	3	2	2	3	2	2	3	2	2	1.4	1.4	1.4	258.6	2337	2337;2440;914;537;545;546	1	26	0.0040505	2.1301	1.4	0.9	0.9	758550000	54347000	85772000	61936000	1	1	0	6
O75396	O75396	12	12	12	2438800000	2319400000	2421700000	Vesicle-trafficking protein SEC22b	SEC22B		1	12	12	12	11	10	10	11	10	10	11	10	10	51.6	51.6	51.6	24.593	215	215	1	243	0	323.31	51.6	47.9	48.8	29607000000	2471800000	2036800000	2250400000	12	9	10	137
O75400-2;O75400-3;O75400;F5H578;H0YG38;H7C2N3	O75400-2;O75400-3;O75400	12;12;12;4;2;1	12;12;12;4;2;1	12;12;12;4;2;1	244230000	271040000	293670000	Pre-mRNA-processing factor 40 homolog A	PRPF40A	;;	6	12	12	12	9	11	9	9	11	9	9	11	9	15.2	15.2	15.2	105.93	930	930;939;957;448;346;163	1	147	0	31.231	11.5	13.3	11.3	3242800000	245180000	294960000	273480000	2	3	4	48
O75436;F5H4L7;S4R3Q6;O75436-2;G3V1N8;S4R2Y3	O75436;F5H4L7;S4R3Q6;O75436-2;G3V1N8	16;15;12;12;9;1	16;15;12;12;9;1	14;13;11;11;7;1	1125000000	1044300000	1179300000	Vacuolar protein sorting-associated protein 26A	VPS26A	;;;;	6	16	16	14	15	16	15	15	16	15	13	14	13	56.9	56.9	52.6	38.169	327	327;310;226;251;216;63	1	238	0	167.97	53.5	56.9	52.9	13108000000	1172400000	1146400000	1039800000	9	10	11	130
O75439;G3V0E4;E7ERZ4;F8WAZ6;F8WEA6;F8WBE1	O75439;G3V0E4;E7ERZ4	16;14;11;7;3;3	16;14;11;7;3;3	16;14;11;7;3;3	709990000	570320000	649630000	Mitochondrial-processing peptidase subunit beta	PMPCB	;;	6	16	16	16	14	11	12	14	11	12	14	11	12	42.9	42.9	42.9	54.366	489	489;490;403;202;119;122	1	243	0	142.62	36.6	26.6	33.3	7830300000	653080000	497750000	510780000	9	5	5	117
O75475;O75475-3;O75475-2	O75475;O75475-3;O75475-2	10;9;9	9;8;8	9;8;8	289240000	281480000	278400000	PC4 and SFRS1-interacting protein	PSIP1	;;	3	10	9	9	9	10	10	8	9	9	8	9	9	20.8	19.2	19.2	60.103	530	530;329;333	1	108	0	20.138	18.1	20.8	20.8	3431800000	257690000	301350000	333220000	6	5	2	58
O75477;B0QZ43	O75477;B0QZ43	10;7	7;4	7;4	153320000	123620000	119050000	Erlin-1	ERLIN1	;	2	10	7	7	8	7	9	5	4	6	5	4	6	32.9	24	24	38.925	346	346;275	1	57	0	12.351	26	21.4	28.9	1511900000	149040000	101960000	104350000	4	0	2	19
O75489;E9PS48;B4DFM8;E9PKL8;G3V194;E9PJE7	O75489	10;3;3;2;2;1	10;3;3;2;2;1	10;3;3;2;2;1	338630000	298430000	292110000	NADH dehydrogenase [ubiquinone] iron-sulfur protein 3, mitochondrial	NDUFS3		6	10	10	10	10	6	7	10	6	7	10	6	7	46.2	46.2	46.2	30.241	264	264;161;132;77;121;67	1	104	0	34.929	46.2	28.8	33.7	3955100000	501850000	195750000	379040000	7	3	4	49
O75506	O75506	2	2	2	94432000	0	128990000	Heat shock factor-binding protein 1	HSBP1		1	2	2	2	2	1	2	2	1	2	2	1	2	47.4	47.4	47.4	8.5435	76	76	1	19	0	15.668	47.4	32.9	47.4	964730000	95436000	31327000	117830000	2	1	2	16
O75521-2;O75521;F1LLU7;F8WAW4;C9JB63;F8W6J1;C9J000	O75521-2;O75521;F1LLU7;F8WAW4;C9JB63	7;7;5;4;4;2;2	7;7;5;4;4;2;2	7;7;5;4;4;2;2	205240000	193690000	207000000	Enoyl-CoA delta isomerase 2, mitochondrial	ECI2	;;;;	7	7	7	7	4	6	5	4	6	5	4	6	5	30.1	30.1	30.1	39.609	359	359;394;197;140;220;152;227	1	82	0	25.342	15	22.8	18.4	2400100000	170960000	193700000	150770000	2	5	3	42
O75531	O75531	6	6	6	658550000	746030000	746360000	Barrier-to-autointegration factor;Barrier-to-autointegration factor, N-terminally processed	BANF1		1	6	6	6	5	6	6	5	6	6	5	6	6	66.3	66.3	66.3	10.058	89	89	1	96	0	48.311	58.4	66.3	66.3	7472200000	584510000	1405700000	587400000	4	3	4	38
O75533;H7C341;B4DGZ4;O75533-2;F8WC19	O75533	41;6;4;4;1	41;6;4;4;1	41;6;4;4;1	1024300000	1048000000	1010100000	Splicing factor 3B subunit 1	SF3B1		5	41	41	41	29	30	28	29	30	28	29	30	28	45.7	45.7	45.7	145.83	1304	1304;241;154;144;37	1	437	0	323.31	30.8	30.9	29.9	12247000000	1012000000	1000300000	910220000	20	20	19	258
O75534-2;O75534;O75534-3;O75534-4;E9PLT0;E9PKN4;E9PLD4;E9PNG3	O75534-2;O75534;O75534-3;O75534-4;E9PLT0	18;18;18;18;15;2;2;2	18;18;18;18;15;2;2;2	18;18;18;18;15;2;2;2	299120000	286520000	305300000	Cold shock domain-containing protein E1	CSDE1	;;;;	8	18	18	18	13	14	12	13	14	12	13	14	12	29.2	29.2	29.2	85.746	767	767;798;813;844;668;46;94;136	1	157	0	45.27	21.9	24	20.5	3455500000	325590000	324670000	361650000	6	9	6	67
O75569-3;O75569-2;O75569;F8WEG8;G5E9Q4;C9JMM3;B4DJC7	O75569-3;O75569-2;O75569;F8WEG8;G5E9Q4;C9JMM3	5;5;5;3;3;3;2	5;5;5;3;3;3;2	5;5;5;3;3;3;2	23741000	0	0	Interferon-inducible double-stranded RNA-dependent protein kinase activator A	PRKRA	;;;;;	7	5	5	5	2	1	2	2	1	2	2	1	2	24.7	24.7	24.7	31.635	288	288;302;313;95;105;108;200	1	25	0	11.78	10.8	4.2	9.4	281720000	25141000	15219000	32182000	1	1	2	13
O75607	O75607	2	2	2	51334000	49713000	52256000	Nucleoplasmin-3	NPM3		1	2	2	2	2	2	2	2	2	2	2	2	2	20.8	20.8	20.8	19.343	178	178	1	22	0	35.796	20.8	20.8	20.8	541300000	50296000	47335000	52000000	2	1	1	7
O75608-2;O75608;E5RGR0;E5RJ48	O75608-2;O75608;E5RGR0	7;7;6;2	7;7;6;2	7;7;6;2	139180000	186070000	171910000	Acyl-protein thioesterase 1	LYPLA1	;;	4	7	7	7	4	6	5	4	6	5	4	6	5	61.2	61.2	61.2	22.875	214	214;230;197;90	1	81	0	82.799	43.5	54.7	42.5	2135500000	99142000	187400000	181020000	4	5	2	46
O75616;J3QT61;J3QSB2;J3QRV9;O75616-2	O75616;J3QT61;J3QSB2;J3QRV9;O75616-2	5;3;3;3;3	5;3;3;3;3	5;3;3;3;3	61640000	66097000	62749000	GTPase Era, mitochondrial	ERAL1	;;;;	5	5	5	5	4	4	3	4	4	3	4	4	3	14.9	14.9	14.9	48.349	437	437;171;276;284;276	1	44	0	9.0922	10.8	11.7	7.6	796480000	52900000	63380000	53235000	2	1	1	14
O75629	O75629	3	3	3	340370000	192080000	258700000	Protein CREG1	CREG1		1	3	3	3	3	3	2	3	3	2	3	3	2	24.5	24.5	24.5	24.074	220	220	1	72	0	127.5	24.5	24.5	15	3505900000	334860000	199170000	240070000	3	3	2	35
O75643;C9JAQ9;O75643-2;B4E0P5	O75643	54;16;16;14	54;16;16;14	54;16;16;14	1123900000	1254500000	1242800000	U5 small nuclear ribonucleoprotein 200 kDa helicase	SNRNP200		4	54	54	54	44	43	40	44	43	40	44	43	40	34.5	34.5	34.5	244.5	2136	2136;625;625;595	1	585	0	323.31	28.8	27.2	25.2	14507000000	1243800000	1160700000	1158500000	30	32	19	332
O75663;O75663-2	O75663;O75663-2	14;10	14;10	14;10	277170000	301500000	292400000	TIP41-like protein	TIPRL	;	2	14	14	14	12	13	9	12	13	9	12	13	9	70.2	70.2	70.2	31.444	272	272;178	1	157	0	41.422	64.3	66.2	49.6	3611000000	296540000	273810000	211350000	6	3	3	67
O75688;C9JIR6;O75688-5;O75688-4;O75688-2;B8ZZF0;O75688-3	O75688;C9JIR6;O75688-5;O75688-4;O75688-2;B8ZZF0	5;4;4;4;4;3;1	3;2;2;2;2;1;1	3;2;2;2;2;1;1	17790000	0	0	Protein phosphatase 1B	PPM1B	;;;;;	7	5	3	3	4	3	4	2	1	2	2	1	2	13.4	8.8	8.8	52.642	479	479;378;327;380;387;303;193	1	8	0.00026802	3.554	10.6	6.9	9.6	86820000	17816000	11485000	19726000	1	0	0	3
O75694;E9PF10;O75694-2;D6RA13	O75694;E9PF10;O75694-2	32;31;31;1	32;31;31;1	32;31;31;1	716740000	654910000	686350000	Nuclear pore complex protein Nup155	NUP155	;;	4	32	32	32	25	24	25	25	24	25	25	24	25	33.9	33.9	33.9	155.2	1391	1391;1327;1332;54	1	362	0	252.44	25.2	24	25.9	9004700000	729240000	574320000	630220000	10	12	10	168
O75717-2;O75717;F8W7P7;C9JYB3	O75717-2;O75717;F8W7P7	5;5;4;1	5;5;4;1	5;5;4;1	40242000	32182000	37679000	WD repeat and HMG-box DNA-binding protein 1	WDHD1	;;	4	5	5	5	5	4	4	5	4	4	5	4	4	6.3	6.3	6.3	112.7	1006	1006;1129;647;168	1	54	0	7.0001	6.3	4.5	4.9	468790000	47378000	26277000	33808000	2	1	0	16
O75718;C9JP16	O75718;C9JP16	15;13	15;13	15;13	627720000	687450000	682090000	Cartilage-associated protein	CRTAP	;	2	15	15	15	11	14	14	11	14	14	11	14	14	43.9	43.9	43.9	46.561	401	401;358	1	183	0	70.411	30.4	40.6	41.9	8866500000	705920000	700690000	711880000	6	6	10	98
O75746;O75746-2;F8W9J0;H0YFB2;B4DGK6	O75746;O75746-2	14;11;3;3;3	10;7;3;3;3	10;7;3;3;3	95850000	94669000	97915000	Calcium-binding mitochondrial carrier protein Aralar1	SLC25A12	;	5	14	10	10	11	7	5	8	6	3	8	6	3	27.6	21.2	21.2	74.761	678	678;571;87;175;210	1	92	0	21.948	21.7	12.4	8.8	1145000000	129430000	87344000	45698000	4	4	3	40
O75792	O75792	5	5	5	0	48498000	0	Ribonuclease H2 subunit A	RNASEH2A		1	5	5	5	3	4	4	3	4	4	3	4	4	22.4	22.4	22.4	33.395	299	299	1	47	0	4.483	12.7	17.1	17.1	662320000	37625000	48796000	60811000	0	1	0	7
O75815;O75815-3;O75815-2	O75815;O75815-3;O75815-2	4;3;2	4;3;2	4;3;2	25676000	0	0	Breast cancer anti-estrogen resistance protein 3	BCAR3	;;	3	4	4	4	2	2	2	2	2	2	2	2	2	6.3	6.3	6.3	92.565	825	825;734;501	1	21	0.0024679	2.5436	2.2	3.6	2.9	279900000	17743000	20026000	42915000	0	0	0	6
O75821;K7EL20;K7ENA8;K7EP16	O75821;K7EL20;K7ENA8	15;12;12;7	15;12;12;7	6;3;6;3	918660000	947480000	946800000	Eukaryotic translation initiation factor 3 subunit G	EIF3G	;;	4	15	15	6	14	11	13	14	11	13	6	3	5	49.7	49.7	21.9	35.611	320	320;262;289;118	1	190	0	117.62	46.9	43.8	46.9	12023000000	987870000	960690000	903050000	12	12	9	130
O75822;O75822-3;O75822-2;H0YLP3;H0YGJ7	O75822;O75822-3;O75822-2	14;12;11;5;4	14;12;11;5;4	14;12;11;5;4	727970000	624770000	697260000	Eukaryotic translation initiation factor 3 subunit J	EIF3J	;;	5	14	14	14	12	12	10	12	12	10	12	12	10	53.5	53.5	53.5	29.062	258	258;209;204;117;106	1	171	0	80.901	50.8	50.4	45.3	8164700000	596360000	587210000	610470000	9	5	7	80
O75828	O75828	8	6	6	448900000	384730000	362210000	Carbonyl reductase [NADPH] 3	CBR3		1	8	6	6	6	6	7	4	5	5	4	5	5	36.1	25.6	25.6	30.85	277	277	1	73	0	35.965	26.7	24.9	29.6	5095100000	401460000	320740000	362750000	3	2	4	34
O75844	O75844	12	12	12	495280000	544170000	581010000	CAAX prenyl protease 1 homolog	ZMPSTE24		1	12	12	12	10	7	7	10	7	7	10	7	7	30.5	30.5	30.5	54.812	475	475	1	150	0	72.352	22.9	15.8	16.8	6601600000	612540000	423270000	456520000	8	5	4	76
O75874;C9J4N6;C9JLU6;C9JJE5	O75874	27;12;7;5	27;12;7;5	27;12;7;5	4512800000	4581500000	4385200000	Isocitrate dehydrogenase [NADP] cytoplasmic	IDH1		4	27	27	27	26	24	26	26	24	26	26	24	26	73.9	73.9	73.9	46.659	414	414;157;73;62	1	457	0	287.77	72.2	65.7	68.1	57697000000	4756900000	4431900000	4146800000	31	24	26	318
O75915;F8WF90;C9JQU6;F8WF33	O75915;F8WF90;C9JQU6;F8WF33	4;2;2;2	4;2;2;2	4;2;2;2	260560000	299950000	254050000	PRA1 family protein 3	ARL6IP5	;;;	4	4	4	4	4	4	3	4	4	3	4	4	3	24.5	24.5	24.5	21.614	188	188;59;88;93	1	68	0	59.166	24.5	24.5	20.7	3649200000	314110000	333500000	181470000	5	5	4	50
O75934	O75934	7	7	7	193090000	232340000	251110000	Pre-mRNA-splicing factor SPF27	BCAS2		1	7	7	7	5	5	7	5	5	7	5	5	7	48	48	48	26.131	225	225	1	82	0	34.506	36.9	36.9	48	2721500000	182040000	156240000	286860000	3	2	4	39
O75937;S4R3J5	O75937	12;2	12;2	12;2	656980000	759530000	879020000	DnaJ homolog subfamily C member 8	DNAJC8		2	12	12	12	9	9	9	9	9	9	9	9	9	55.7	55.7	55.7	29.841	253	253;106	1	178	0	158.17	40.3	41.1	41.5	8948300000	649710000	693540000	869320000	6	8	9	101
O75940	O75940	2	2	2	0	35511000	27002000	Survival of motor neuron-related-splicing factor 30	SMNDC1		1	2	2	2	1	2	2	1	2	2	1	2	2	20.2	20.2	20.2	26.711	238	238	1	21	0.00027137	3.7423	11.3	20.2	20.2	388470000	17637000	36857000	24534000	0	1	1	11
O75947;O75947-2;F5H608	O75947;O75947-2;F5H608	12;10;6	12;10;6	12;10;6	876870000	1019100000	978230000	ATP synthase subunit d, mitochondrial	ATP5H	;;	3	12	12	12	9	9	10	9	9	10	9	9	10	83.2	83.2	83.2	18.491	161	161;137;81	1	151	0	67.915	68.9	71.4	68.9	11973000000	973480000	897950000	822070000	7	6	11	102
O75955;B4DVY7;A2AB09;A2AB12;A2AB10;A2AB13;A2AB11;A2ABJ5	O75955;B4DVY7;A2AB09;A2AB12;A2AB10	9;8;6;5;5;4;4;1	9;8;6;5;5;4;4;1	9;8;6;5;5;4;4;1	206470000	189800000	189750000	Flotillin-1	FLOT1	;;;;	8	9	9	9	8	8	9	8	8	9	8	8	9	28.3	28.3	28.3	47.355	427	427;379;238;235;252;185;192;145	1	118	0	41.709	25.3	25.1	28.3	2413300000	184620000	178970000	193200000	4	2	4	43
O75962-2;O75962;O75962-5;O75962-4;E7EWP2;E7EPJ7;F5H228;O75962-3	O75962-2;O75962;O75962-5;O75962-4;E7EWP2;E7EPJ7;F5H228	8;8;7;7;6;6;4;1	8;8;7;7;6;6;4;1	8;8;7;7;6;6;4;1	121470000	114620000	129580000	Triple functional domain protein	TRIO	;;;;;;	8	8	8	8	5	5	3	5	5	3	5	5	3	3	3	3	329.39	2921	2921;3097;2563;3038;2309;2546;1508;596	1	66	0	11.103	1.9	1.8	1	1668400000	125840000	124960000	212610000	2	1	1	29
O75964;E9PN17	O75964;E9PN17	6;5	6;5	6;5	696550000	620320000	618310000	ATP synthase subunit g, mitochondrial	ATP5L	;	2	6	6	6	6	5	6	6	5	6	6	5	6	52.4	52.4	52.4	11.428	103	103;76	1	99	0	38.994	52.4	51.5	52.4	7825200000	723840000	501860000	651480000	6	4	2	56
O75976-2;O75976;J3QRJ9;J3QQJ4	O75976-2;O75976	4;4;1;1	4;4;1;1	4;4;1;1	30675000	20294000	25770000	Carboxypeptidase D	CPD	;	4	4	4	4	3	2	3	3	2	3	3	2	3	4.1	4.1	4.1	126.49	1133	1133;1380;82;184	1	28	0	5.9916	2.8	1.8	2.8	245350000	36688000	12163000	29551000	2	0	0	10
O76003	O76003	16	16	16	1382500000	1475500000	1331400000	Glutaredoxin-3	GLRX3		1	16	16	16	15	13	12	15	13	12	15	13	12	54.9	54.9	54.9	37.432	335	335	1	228	0	250.62	54.6	42.1	43.3	17229000000	1856000000	1256000000	1165200000	13	12	10	135
O76031;H0YM48;H0YK07	O76031	14;3;2	14;3;2	14;3;2	191680000	204050000	220510000	ATP-dependent Clp protease ATP-binding subunit clpX-like, mitochondrial	CLPX		3	14	14	14	10	10	8	10	10	8	10	10	8	33.2	33.2	33.2	69.223	633	633;268;130	1	138	0	30.139	24.6	20.1	15.5	2496300000	201980000	192920000	178810000	3	3	3	46
O76070;F8W754	O76070	5;1	5;1	5;1	104030000	70239000	82353000	Gamma-synuclein	SNCG		2	5	5	5	4	3	3	4	3	3	4	3	3	42.5	42.5	42.5	13.331	127	127;126	1	40	0	12.382	35.4	33.9	33.9	833350000	75542000	50198000	48141000	2	0	0	7
O76071	O76071	9	9	9	134380000	140620000	126410000	Probable cytosolic iron-sulfur protein assembly protein CIAO1	CIAO1		1	9	9	9	7	5	7	7	5	7	7	5	7	38.6	38.6	38.6	37.84	339	339	1	91	0	17.461	27.4	21.2	29.8	1698400000	152600000	104520000	129160000	3	2	1	38
O76094;O76094-2;D6RDY6;R4GNC1	O76094;O76094-2	26;24;12;9	26;24;12;9	26;24;12;9	898390000	879760000	887000000	Signal recognition particle subunit SRP72	SRP72	;	4	26	26	26	18	19	16	18	19	16	18	19	16	51.6	51.6	51.6	74.605	671	671;610;357;220	1	287	0	242.12	34.9	36.2	30.8	10699000000	761490000	869030000	676030000	7	11	10	138
O94760;B4DYP1;B4DGT0;O94760-2	O94760;B4DYP1;B4DGT0;O94760-2	10;6;6;6	10;6;6;6	9;5;5;5	261390000	236990000	225620000	N(G),N(G)-dimethylarginine dimethylaminohydrolase 1	DDAH1	;;;	4	10	10	9	7	6	8	7	6	8	6	5	7	41.1	41.1	38.2	31.121	285	285;185;192;182	1	106	0	20.593	27.7	27.7	34	3094500000	302160000	169350000	177180000	5	3	6	52
O94766;G3V150;B7ZAB3;E9PNA1;Q9NPZ5	O94766;G3V150;B7ZAB3	5;4;4;2;1	5;4;4;2;1	5;4;4;2;1	0	0	29229000	Galactosylgalactosylxylosylprotein 3-beta-glucuronosyltransferase 3	B3GAT3	;;	5	5	5	5	1	1	2	1	1	2	1	1	2	21.5	21.5	21.5	37.121	335	335;319;315;223;323	1	32	0	9.809	4.2	4.2	6.9	424060000	11099000	13067000	16193000	0	1	1	19
O94776;O94776-2	O94776;O94776-2	17;9	17;9	17;9	473660000	473250000	499860000	Metastasis-associated protein MTA2	MTA2	;	2	17	17	17	15	15	13	15	15	13	15	15	13	33.5	33.5	33.5	75.022	668	668;495	1	189	0	58.807	28.6	28.6	24.3	5970700000	479430000	499910000	423010000	8	10	8	101
O94804;H0YB71	O94804	5;2	3;1	3;1	24869000	0	0	Serine/threonine-protein kinase 10	STK10		2	5	3	3	4	3	3	2	2	2	2	2	2	5.6	3.5	3.5	112.13	968	968;281	1	28	0	4.6786	4	2.9	3.3	270400000	20704000	19658000	15674000	1	0	1	7
O94826	O94826	24	24	24	635700000	702420000	720400000	Mitochondrial import receptor subunit TOM70	TOMM70A		1	24	24	24	16	19	20	16	19	20	16	19	20	56.9	56.9	56.9	67.454	608	608	1	273	0	108.81	38.5	45.9	49.7	8759000000	602600000	665840000	724040000	8	13	12	134
O94855;O94855-2;E9PDM8;E9PC44	O94855;O94855-2;E9PDM8;E9PC44	21;21;18;14	21;21;18;14	21;21;18;14	522430000	528220000	523060000	Protein transport protein Sec24D	SEC24D	;;;	4	21	21	21	16	16	16	16	16	16	16	16	16	27	27	27	113.01	1032	1032;1033;663;393	1	228	0	83.493	20.8	21.5	21.6	6726500000	575360000	570140000	540300000	4	6	5	72
O94874;O94874-2;O94874-3	O94874;O94874-2;O94874-3	17;16;13	17;16;13	17;16;13	170540000	144820000	167340000	E3 UFM1-protein ligase 1	UFL1	;;	3	17	17	17	9	9	9	9	9	9	9	9	9	27.7	27.7	27.7	89.594	794	794;729;509	1	128	0	25.719	14.9	13.2	13.6	1990300000	131830000	134320000	154870000	5	4	3	49
O94875-7;O94875;O94875-11;H7BXR3;O94875-9;O94875-5;O94875-3;O94875-8;O94875-2;O94875-4;O94875-12;O94875-10;H7C1R7;H7BZK1;H7BZX1;O94875-6	O94875-7;O94875;O94875-11;H7BXR3;O94875-9;O94875-5;O94875-3;O94875-8;O94875-2;O94875-4;O94875-12;O94875-10;H7C1R7	5;5;5;4;4;4;4;4;4;4;4;4;3;2;1;1	5;5;5;4;4;4;4;4;4;4;4;4;3;2;1;1	5;5;5;4;4;4;4;4;4;4;4;4;3;2;1;1	111950000	132620000	88767000	Sorbin and SH3 domain-containing protein 2	SORBS2	;;;;;;;;;;;;	16	5	5	5	3	3	3	3	3	3	3	3	3	6.4	6.4	6.4	113.55	1004	1004;1100;1200;636;644;645;645;661;666;691;731;824;291;291;253;156	1	44	0	6.5784	4.2	4.2	4.2	1007800000	104160000	103270000	90047000	2	1	1	11
O94888;F8WB69;C9JAT7;F5GYB1	O94888;F8WB69;C9JAT7;F5GYB1	2;1;1;1	2;1;1;1	2;1;1;1	0	41778000	0	UBX domain-containing protein 7	UBXN7	;;;	4	2	2	2	1	2	1	1	2	1	1	2	1	5.3	5.3	5.3	54.862	489	489;75;327;341	1	16	0.000258	3.0637	2.7	5.3	2.7	301920000	8480900	43993000	35485000	0	0	0	5
O94903;E5RFX7;E5RG77;H0YBG2;E5RFZ4	O94903;E5RFX7;E5RG77	5;4;4;2;1	5;4;4;2;1	5;4;4;2;1	74544000	63536000	77522000	Proline synthase co-transcribed bacterial homolog protein	PROSC	;;	5	5	5	5	2	2	2	2	2	2	2	2	2	24.7	24.7	24.7	30.344	275	275;137;152;128;74	1	34	0	11.33	10.5	10.5	10.5	753080000	63917000	58724000	62338000	2	2	2	25
O94906;O94906-2	O94906;O94906-2	24;23	24;23	24;23	310800000	298630000	301770000	Pre-mRNA-processing factor 6	PRPF6	;	2	24	24	24	13	11	15	13	11	15	13	11	15	27.9	27.9	27.9	106.92	941	941;901	1	183	0	51.209	16.5	12.6	17.6	3619900000	276040000	233390000	310000000	6	2	4	44
O94925-3;B8ZZA8;B8ZZC5	O94925-3	19;5;4	19;5;4	3;3;3	962450000	956090000	1113800000	Glutaminase kidney isoform, mitochondrial	GLS		3	19	19	3	17	15	15	17	15	15	2	3	3	43.6	43.6	6.9	65.459	598	598;169;103	1	265	0	193.35	41	39	34.8	12692000000	998620000	831970000	894860000	13	10	13	159
O94973;O94973-2;O94973-3;E9PR62;H0YDE9;H0YEG0;E9PQP4;E9PPY8	O94973;O94973-2;O94973-3	20;20;16;6;4;4;3;2	10;10;6;3;2;2;2;1	10;10;6;3;2;2;2;1	159430000	176290000	195760000	AP-2 complex subunit alpha-2	AP2A2	;;	8	20	10	10	15	17	15	6	7	5	6	7	5	28.6	16.2	16.2	103.96	939	939;940;656;378;184;185;90;138	1	97	0	40.346	22.2	25.1	21	2107500000	122920000	160710000	115560000	2	4	4	52
O94992;Q96MH2	O94992	8;1	8;1	8;1	137480000	135830000	136360000	Protein HEXIM1	HEXIM1		2	8	8	8	6	6	6	6	6	6	6	6	6	32.9	32.9	32.9	40.623	359	359;286	1	69	0	17.558	25.9	26.2	26.2	1644300000	138370000	142860000	147860000	3	1	1	23
O95084;B4E2J3;E9PRR2	O95084;B4E2J3	7;6;1	7;6;1	7;6;1	174900000	181300000	194710000	Serine protease 23	PRSS23	;	3	7	7	7	6	6	6	6	6	6	6	6	6	34.7	34.7	34.7	43.001	383	383;351;154	1	75	0	17.009	26.9	28.2	29	2008700000	162920000	181210000	177660000	1	3	2	35
O95104-2;O95104-3;O95104	O95104-2;O95104-3;O95104	4;4;4	4;4;4	1;1;1	58687000	58107000	0	Splicing factor, arginine/serine-rich 15	SCAF4	;;	3	4	4	1	4	3	1	4	3	1	1	1	0	3.5	3.5	1.2	123.64	1125	1125;1132;1147	1	42	0	5.3716	3.5	2.8	1.1	667780000	65737000	46671000	22814000	2	0	0	11
O95140;O95140-2;Q5JXC5	O95140;O95140-2	8;6;1	8;6;1	8;6;1	60836000	54268000	74951000	Mitofusin-2	MFN2	;	3	8	8	8	5	5	6	5	5	6	5	5	6	12.4	12.4	12.4	86.401	757	757;436;98	1	70	0	12.062	8.3	8.3	9.5	840470000	61238000	47776000	61415000	3	2	3	25
O95155-2;O95155;O95155-4;O95155-3;K7EP75;K7ERA7;B1AQ61	O95155-2;O95155;O95155-4;O95155-3	15;15;15;12;4;1;1	15;15;15;12;4;1;1	15;15;15;12;4;1;1	173670000	152870000	162100000	Ubiquitin conjugation factor E4 B	UBE4B	;;;	7	15	15	15	9	10	9	9	10	9	9	10	9	19.7	19.7	19.7	133.27	1173	1173;1302;1353;1061;276;98;100	1	132	0	30.404	10.4	11.1	12.4	2008000000	168240000	173390000	144790000	2	3	1	34
O95159;E9PMQ3;E9PQA5;E9PQ47;E9PNY1;H0YCU8;E9PJX1;E9PJ47	O95159;E9PMQ3;E9PQA5;E9PQ47;E9PNY1	4;2;2;2;2;1;1;1	4;2;2;2;2;1;1;1	4;2;2;2;2;1;1;1	48578000	0	0	Zinc finger protein-like 1	ZFPL1	;;;;	8	4	4	4	2	2	1	2	2	1	2	2	1	14.8	14.8	14.8	34.114	310	310;109;172;188;207;53;65;80	1	21	0	3.8217	8.7	6.1	2.9	385180000	50787000	22519000	25987000	2	2	1	14
O95163;F5H2T0;H0YDF3	O95163;F5H2T0	27;23;5	27;23;5	27;23;5	472650000	460800000	474210000	Elongator complex protein 1	IKBKAP	;	3	27	27	27	21	18	17	21	18	17	21	18	17	29.8	29.8	29.8	150.25	1332	1332;983;346	1	252	0	110.02	23.1	17.9	17	5722600000	533940000	437880000	418160000	7	10	9	94
O95197-3;O95197-5;O95197-4;O95197-7;O95197-2;O95197;B7Z4M1;F5H617;O95197-6;F5H891;F5GWG7	O95197-3;O95197-5;O95197-4;O95197-7;O95197-2;O95197;B7Z4M1;F5H617;O95197-6	4;3;3;3;3;3;2;2;2;1;1	4;3;3;3;3;3;2;2;2;1;1	4;3;3;3;3;3;2;2;2;1;1	901790000	968690000	726360000	Reticulon-3;Reticulon	RTN3	;;;;;;;;	11	4	4	4	4	3	2	4	3	2	4	3	2	39	39	39	25.609	236	236;241;255;920;1013;1032;123;185;214;130;136	1	49	0	30.536	39	27.5	11	10835000000	954410000	898030000	656230000	2	3	2	32
O95202;O95202-2;O95202-3	O95202	16;3;3	16;3;3	16;3;3	449470000	452550000	412090000	LETM1 and EF-hand domain-containing protein 1, mitochondrial	LETM1		3	16	16	16	11	13	12	11	13	12	11	13	12	29	29	29	83.353	739	739;254;294	1	170	0	80.197	20.2	25.7	21.5	5459000000	418960000	421680000	373390000	9	6	5	75
O95218-2;O95218	O95218-2;O95218	7;7	7;7	7;7	155350000	164370000	138390000	Zinc finger Ran-binding domain-containing protein 2	ZRANB2	;	2	7	7	7	6	6	7	6	6	7	6	6	7	24.4	24.4	24.4	36.318	320	320;330	1	107	0	13.091	21.6	21.6	24.4	1900200000	120160000	144300000	117180000	5	4	3	50
O95239;O95239-2;Q2VIQ3	O95239;O95239-2;Q2VIQ3	4;3;2	4;3;2	3;2;1	0	0	26021000	Chromosome-associated kinesin KIF4A;Chromosome-associated kinesin KIF4B	KIF4A;KIF4B	;;	3	4	4	3	3	3	3	3	3	3	2	3	3	3.2	3.2	2.3	139.88	1232	1232;1127;1234	1	34	0.0017592	2.7148	2.4	2.3	2.3	405590000	52328000	42614000	40229000	1	0	1	5
O95251;G3V125;O95251-5;O95251-2;O95251-4;E7EUP3;O95251-3	O95251;G3V125;O95251-5;O95251-2;O95251-4	3;2;2;2;2;1;1	3;2;2;2;2;1;1	3;2;2;2;2;1;1	16578000	0	0	Histone acetyltransferase KAT7	KAT7	;;;;	7	3	3	3	2	0	1	2	0	1	2	0	1	5.4	5.4	5.4	70.642	611	611;455;472;501;581;425;442	1	15	0	4.5092	4.3	0	2.5	88391000	16302000	0	0	1	0	1	8
O95274	O95274	1	1	1	0	38566000	0	Ly6/PLAUR domain-containing protein 3	LYPD3		1	1	1	1	1	1	1	1	1	1	1	1	1	3.2	3.2	3.2	35.97	346	346	1	22	0.0040767	2.2089	3.2	3.2	3.2	414580000	34079000	36370000	33686000	0	1	0	8
O95292;E5RK64;O95292-2	O95292	11;3;3	10;2;2	10;2;2	679830000	808530000	713020000	Vesicle-associated membrane protein-associated protein B/C	VAPB		3	11	10	10	7	8	9	6	7	8	6	7	8	50.2	50.2	50.2	27.228	243	243;71;99	1	126	0	32.78	33.3	33.3	34.2	8820200000	625340000	732540000	675040000	5	7	5	83
O95297-4;O95297-2;O95297;Q9UEL6;O95297-5;O95297-3	O95297-4;O95297-2;O95297	4;4;4;1;1;1	4;4;4;1;1;1	4;4;4;1;1;1	129000000	98871000	115170000	Myelin protein zero-like protein 1	MPZL1	;;	6	4	4	4	3	3	3	3	3	3	3	3	3	33.8	33.8	33.8	15.947	145	145;268;269;183;119;209	1	42	0	10.914	24.8	24.8	26.9	1379100000	101450000	71636000	115600000	2	1	2	24
O95302;O95302-3;B7Z230;O95302-2;C9J4P8;Q75LS8	O95302;O95302-3;B7Z230	15;14;11;7;6;1	14;14;11;7;6;1	14;14;11;7;6;1	428150000	435980000	486060000	Peptidyl-prolyl cis-trans isomerase FKBP9	FKBP9	;;	6	15	14	14	12	14	8	11	13	7	11	13	7	38.2	37	37	63.083	570	570;623;432;338;225;142	1	138	0	99.174	31.2	34.9	21.9	5140800000	469180000	492180000	333090000	5	7	5	73
O95336;M0R261;M0R1L2;M0R0U3	O95336;M0R261;M0R1L2;M0R0U3	12;9;6;6	12;9;6;6	12;9;6;6	907650000	958750000	939830000	6-phosphogluconolactonase	PGLS	;;;	4	12	12	12	11	11	11	11	11	11	11	11	11	65.5	65.5	65.5	27.547	258	258;216;147;179	1	211	0	59.039	61.2	61.2	61.2	11077000000	862530000	893230000	915160000	9	10	9	117
O95347;O95347-2;Q5T821	O95347;O95347-2	32;30;5	32;30;5	32;30;5	550300000	493890000	482780000	Structural maintenance of chromosomes protein 2	SMC2	;	3	32	32	32	23	22	23	23	22	23	23	22	23	31.7	31.7	31.7	135.65	1197	1197;1099;145	1	295	0	101.68	21.9	21.1	21.7	6437000000	589050000	458640000	452440000	12	10	3	105
O95352;O95352-3;O95352-2;H7C059;C9JFF4;C9J415;H7C369;C9JNU2;C9JKA3;H7C2R3;H7BZ92;C9JE55;H7C2J8	O95352;O95352-3;O95352-2	13;12;12;3;3;2;1;1;1;1;1;1;1	13;12;12;3;3;2;1;1;1;1;1;1;1	13;12;12;3;3;2;1;1;1;1;1;1;1	119930000	127820000	122840000	Ubiquitin-like modifier-activating enzyme ATG7	ATG7	;;	13	13	13	13	8	9	10	8	9	10	8	9	10	25.2	25.2	25.2	77.959	703	703;623;676;105;176;152;77;89;93;95;96;126;139	1	117	0	32.41	13.9	15.6	16.5	1478000000	107030000	122340000	131480000	2	2	3	40
O95372;Q5QPQ0;Q5QPQ1;Q5QPQ3;Q5QPQ2;E7EPS4;Q5QPN9;Q5QPN5	O95372;Q5QPQ0;Q5QPQ1;Q5QPQ3;Q5QPQ2	7;5;4;4;4;3;3;2	7;5;4;4;4;3;3;2	7;5;4;4;4;3;3;2	508930000	517820000	529620000	Acyl-protein thioesterase 2	LYPLA2	;;;;	8	7	7	7	7	6	5	7	6	5	7	6	5	48.1	48.1	48.1	24.737	231	231;164;162;180;182;134;137;90	1	120	0	126.63	48.1	44.6	33.8	7430300000	659220000	502390000	392220000	6	7	4	68
O95373;E9PLB2;E9PLJ0	O95373	32;3;2	32;3;2	31;3;2	2418900000	2639100000	2464500000	Importin-7	IPO7		3	32	32	31	26	22	22	26	22	22	25	21	21	41.1	41.1	40.2	119.52	1038	1038;130;64	1	473	0	323.31	31.6	25.8	24.9	31397000000	2137700000	2317200000	2108800000	18	25	24	323
O95376	O95376	5	5	5	33180000	54233000	67224000	E3 ubiquitin-protein ligase ARIH2	ARIH2		1	5	5	5	3	3	3	3	3	3	3	3	3	15.4	15.4	15.4	57.818	493	493	1	42	0	13.956	8.1	8.1	8.1	610710000	44392000	51141000	47543000	1	0	1	14
O95394;O95394-3;O95394-4;J3KN95;D6RCQ8;D6RF77;D6RIS6;H0Y987;D6RCD1;H0Y8I3;D6RC77	O95394;O95394-3;O95394-4;J3KN95	22;22;21;16;8;7;6;5;4;4;4	22;22;21;16;8;7;6;5;4;4;4	22;22;21;16;8;7;6;5;4;4;4	1155500000	1153300000	1134800000	Phosphoacetylglucosamine mutase	PGM3	;;;	11	22	22	22	20	19	21	20	19	21	20	19	21	52.4	52.4	52.4	59.851	542	542;566;570;461;146;156;172;197;71;113;114	1	283	0	119.46	47.6	46.7	50.4	13570000000	1111400000	1132700000	1239400000	14	12	14	157
O95400	O95400	4	4	4	0	131680000	138280000	CD2 antigen cytoplasmic tail-binding protein 2	CD2BP2		1	4	4	4	2	4	3	2	4	3	2	4	3	14.1	14.1	14.1	37.646	341	341	1	36	0	6.9436	7.3	14.1	10.9	1289500000	100000000	127640000	125580000	0	0	0	8
O95433;B4DUR9;G3V438;H0YJG7;G3V3W9;H0YJU2;H0YJ63;H0YJG6	O95433;B4DUR9;G3V438	15;11;8;7;5;5;3;3	15;11;8;7;5;5;3;3	15;11;8;7;5;5;3;3	726400000	760230000	703770000	Activator of 90 kDa heat shock protein ATPase homolog 1	AHSA1	;;	8	15	15	15	12	10	10	12	10	10	12	10	10	64.5	64.5	64.5	38.274	338	338;288;203;216;100;133;90;120	1	186	0	115.21	50.3	44.7	38.5	9044400000	691840000	661940000	591050000	10	7	7	107
O95456-2;O95456;F8WBH7	O95456-2;O95456	8;8;2	8;8;2	8;8;2	314410000	282030000	307750000	Proteasome assembly chaperone 1	PSMG1	;	3	8	8	8	8	7	4	8	7	4	8	7	4	46.1	46.1	46.1	30.288	267	267;288;63	1	104	0	28.092	46.1	35.2	22.5	3763300000	377420000	295010000	226360000	3	4	3	44
O95466-2;O95466;O95466-3;K7EK60;K7EJE6	O95466-2;O95466;O95466-3;K7EK60	13;12;12;8;6	13;12;12;8;6	13;12;12;8;6	113290000	119990000	147560000	Formin-like protein 1	FMNL1	;;;	5	13	13	13	5	7	8	5	7	8	5	7	8	15.4	15.4	15.4	122.41	1104	1104;1100;1158;682;488	1	77	0	22.29	5.6	9.1	9.1	1564900000	98614000	130250000	147240000	1	2	2	29
O95470;H0Y3V8;H7BXL7	O95470	5;2;2	5;2;2	5;2;2	134410000	78560000	63452000	Sphingosine-1-phosphate lyase 1	SGPL1		3	5	5	5	2	4	4	2	4	4	2	4	4	12.5	12.5	12.5	63.523	568	568;135;202	1	50	0	8.3336	3.9	8.1	9.5	1320000000	118190000	112470000	46958000	2	0	1	16
O95486;O95486-2	O95486	15;3	15;3	14;3	302710000	280010000	281270000	Protein transport protein Sec24A	SEC24A		2	15	15	14	12	12	8	12	12	8	12	11	8	17.2	17.2	16.5	119.75	1093	1093;613	1	168	0	45.887	14.1	13.1	9.2	3533400000	413830000	248560000	179720000	7	5	5	69
O95487-2;O95487;O95487-3	O95487-2;O95487;O95487-3	7;7;7	6;6;6	6;6;6	44232000	39831000	0	Protein transport protein Sec24B	SEC24B	;;	3	7	6	6	4	4	1	4	3	1	4	3	1	8	7.4	7.4	133.63	1233	1233;1268;1298	1	51	0	8.8567	4.4	3.9	0.9	554190000	53083000	27020000	13363000	1	0	1	19
O95544;O95544-2;O95544-3	O95544;O95544-2;O95544-3	3;3;2	3;3;2	3;3;2	0	0	44780000	NAD kinase	NADK	;;	3	3	3	3	2	1	2	2	1	2	2	1	2	9	9	9	49.228	446	446;591;423	1	24	0	4.2554	5.8	2.5	5.6	360610000	27170000	16231000	42925000	0	0	1	4
O95551;O95551-2;X6R5A3;O95551-3	O95551;O95551-2;X6R5A3;O95551-3	6;6;4;4	6;6;4;4	6;6;4;4	75992000	51750000	58530000	Tyrosyl-DNA phosphodiesterase 2	TDP2	;;;	4	6	6	6	6	5	5	6	5	5	6	5	5	25.4	25.4	25.4	40.929	362	362;392;304;284	1	57	0	30.497	25.4	20.2	20.2	807390000	86720000	56795000	46161000	4	3	1	27
O95571;M0QXB5;M0QY80;M0QX80	O95571;M0QXB5	12;11;3;1	12;11;3;1	12;11;3;1	429570000	385310000	368260000	Persulfide dioxygenase ETHE1, mitochondrial	ETHE1	;	4	12	12	12	11	10	9	11	10	9	11	10	9	74.4	74.4	74.4	27.873	254	254;260;95;51	1	152	0	74.97	70.5	59.1	50.8	4767100000	549450000	427590000	328840000	10	5	4	78
O95573;H7BYZ7;H7C260;F5GWH2;F5H062;C9JC11	O95573	32;7;7;5;3;2	32;7;7;5;3;2	30;6;7;5;3;2	1929200000	1851600000	1843100000	Long-chain-fatty-acid--CoA ligase 3	ACSL3		6	32	32	30	30	29	28	30	29	28	28	27	26	58.9	58.9	54.9	80.419	720	720;179;213;141;95;88	1	460	0	300.88	55.4	54.9	51.8	24093000000	2273300000	1752200000	1700100000	20	20	19	252
O95630;C9JK83	O95630;C9JK83	4;2	4;2	4;2	33020000	35426000	38911000	STAM-binding protein	STAMBP	;	2	4	4	4	3	3	3	3	3	3	3	3	3	10.1	10.1	10.1	48.076	424	424;318	1	37	0	8.2457	8.5	8.3	8.5	469050000	37006000	36628000	43906000	2	2	3	30
O95684-2;O95684;O95684-3;Q8N103-3	O95684-2;O95684;O95684-3	4;4;2;1	4;4;2;1	4;4;2;1	39966000	40444000	41716000	FGFR1 oncogene partner	FGFR1OP	;;	4	4	4	4	3	3	3	3	3	3	3	3	3	18.5	18.5	18.5	40.907	379	379;399;149;522	1	37	0	7.0808	15	15	15	479570000	41915000	34450000	39291000	1	1	1	13
O95747	O95747	18	18	5	939040000	933930000	915030000	Serine/threonine-protein kinase OSR1	OXSR1		1	18	18	5	17	14	14	17	14	14	5	4	3	41.4	41.4	12.1	58.022	527	527	1	212	0	142.87	39.8	30.7	30.2	11243000000	1035300000	878490000	829490000	11	11	9	123
O95758-1;O95758-6;O95758-2;O95758;O95758-5;O95758-4;O95758-7	O95758-1;O95758-6;O95758-2;O95758;O95758-5;O95758-4;O95758-7	6;6;6;6;6;6;5	3;3;3;3;3;3;3	3;3;3;3;3;3;3	74499000	67016000	71636000	Polypyrimidine tract-binding protein 3	PTBP3	;;;;;;	7	6	3	3	5	6	5	2	3	2	2	3	2	20.3	15.5	15.5	56.501	521	521;524;547;552;555;558;457	1	30	0	29.431	13.2	20.3	16.5	819620000	66490000	70772000	52145000	0	3	1	16
O95777;F2Z2Y6;C9JIZ0;C9JNV3	O95777;F2Z2Y6;C9JIZ0;C9JNV3	7;5;5;4	7;5;5;4	7;5;5;4	170900000	208220000	232480000	U6 snRNA-associated Sm-like protein LSm8	LSM8	;;;	4	7	7	7	6	5	6	6	5	6	6	5	6	99	99	99	10.403	96	96;67;75;77	1	70	0	39.577	88.5	63.5	88.5	2390300000	196340000	210150000	272840000	3	3	3	39
O95782-2;O95782;M0R2D9;E9PPZ3;E9PS94;E9PNC4	O95782-2;O95782	36;36;1;1;1;1	36;36;1;1;1;1	26;26;0;0;0;0	1464000000	1449900000	1474800000	AP-2 complex subunit alpha-1	AP2A1	;	6	36	36	26	29	30	31	29	30	31	20	20	21	46.7	46.7	35.4	105.36	955	955;977;57;60;62;125	1	439	0	197.61	38.8	39.1	41.7	17894000000	1434000000	1374500000	1499300000	21	21	26	256
O95786;O95786-2;B3KWW1;A2A376;F5H5W6	O95786;O95786-2;B3KWW1;A2A376;F5H5W6	46;43;42;37;24	46;43;42;37;24	46;43;42;37;24	4671800000	4327800000	4120400000	Probable ATP-dependent RNA helicase DDX58	DDX58	;;;;	5	46	46	46	40	41	36	40	41	36	40	41	36	52	52	52	106.6	925	925;880;854;722;536	1	733	0	323.31	46.5	47.6	41.3	57484000000	4576400000	4286400000	3707700000	38	32	34	451
O95816;B4DXE2;A2A296	O95816;B4DXE2	11;10;5	11;10;5	11;10;5	561390000	591350000	620630000	BAG family molecular chaperone regulator 2	BAG2	;	3	11	11	11	11	11	8	11	11	8	11	11	8	62.6	62.6	62.6	23.772	211	211;178;108	1	138	0	116.63	62.6	62.6	44.1	7214900000	691110000	638100000	450020000	7	5	6	86
O95817;C9JFK9	O95817;C9JFK9	15;11	15;11	15;11	230210000	245910000	206660000	BAG family molecular chaperone regulator 3	BAG3	;	2	15	15	15	8	11	12	8	11	12	8	11	12	36.9	36.9	36.9	61.594	575	575;325	1	148	0	40.437	21	23.1	27.8	2781400000	144620000	221900000	208970000	4	3	1	57
O95831-3;O95831;O95831-2;E9PMA0;O95831-5;O95831-6;O95831-4	O95831-3;O95831;O95831-2;E9PMA0;O95831-5	20;20;12;11;10;8;8	20;20;12;11;10;8;8	20;20;12;11;10;8;8	1096100000	1069200000	1059800000	Apoptosis-inducing factor 1, mitochondrial	AIFM1	;;;;	7	20	20	20	19	16	17	19	16	17	19	16	17	44.7	44.7	44.7	66.294	609	609;613;326;274;261;237;324	1	242	0	76.386	42.9	35	38.3	13106000000	1217200000	1009400000	891990000	13	9	10	124
O95833;Q5SQ17	O95833;Q5SQ17	8;5	8;5	8;5	145010000	134660000	133190000	Chloride intracellular channel protein 3	CLIC3	;	2	8	8	8	6	7	6	6	7	6	6	7	6	40.7	40.7	40.7	26.648	236	236;167	1	93	0	24.018	31.8	35.6	28	1725000000	174160000	123240000	108170000	4	2	2	43
O95834;O95834-2;O95834-3;C9JRL6;K7EIK7;K7EKU5;K7EIM1;K7ELI8;K7EQR0;K7ERY9;K7EKG3;K7ERR2;K7EII6;G3V500;G3V3N9;F8W717;Q05BV3-4;O00423;O00423-3	O95834;O95834-2;O95834-3;C9JRL6;K7EIK7	10;10;10;9;9;4;3;3;3;3;3;2;2;1;1;1;1;1;1	10;10;10;9;9;4;3;3;3;3;3;2;2;1;1;1;1;1;1	9;9;9;8;8;3;2;3;2;2;3;1;2;0;0;0;0;0;0	149270000	130780000	126740000	Echinoderm microtubule-associated protein-like 2	EML2	;;;;	19	10	10	9	7	5	7	7	5	7	6	4	6	21	21	19.7	70.678	649	649;796;850;603;773;225;111;121;133;148;223;98;181;285;379;803;622;815;834	1	94	0	34.016	16.3	10.8	15.6	1803200000	149880000	123120000	141050000	2	2	2	35
O95861;O95861-4;O95861-2;A6NF51;F8W1J0;F8VVW8;F8VZG4	O95861;O95861-4;O95861-2;A6NF51	14;13;13;12;6;5;5	14;13;13;12;6;5;5	4;4;4;4;4;4;4	757690000	687820000	767730000	3(2),5-bisphosphate nucleotidase 1	BPNT1	;;;	7	14	14	4	12	13	11	12	13	11	2	3	2	54.2	54.2	14.3	33.392	308	308;272;325;291;170;128;136	1	209	0	80.919	47.4	50.3	42.5	9283100000	745190000	622870000	744910000	7	9	10	118
O95864;O95864-4;O95864-2;O95864-3	O95864;O95864-4;O95864-2;O95864-3	7;5;5;4	7;5;5;4	7;5;5;4	0	79724000	85106000	Fatty acid desaturase 2	FADS2	;;;	4	7	7	7	3	3	4	3	3	4	3	3	4	20.3	20.3	20.3	52.259	444	444;413;422;386	1	55	0	13.813	7.4	6.1	10.8	977210000	75386000	37276000	90777000	0	1	2	19
O95865;Q5SSV3;Q5SRR8;H0Y7N1	O95865;Q5SSV3;Q5SRR8;H0Y7N1	9;6;6;5	8;5;5;4	8;5;5;4	132190000	157910000	0	N(G),N(G)-dimethylarginine dimethylaminohydrolase 2	DDAH2	;;;	4	9	8	8	8	6	5	7	5	4	7	5	4	42.8	40	40	29.644	285	285;226;236;188	1	70	0	12.972	35.4	23.5	20.7	1618900000	162850000	100330000	49949000	2	2	2	17
O95870-2;O95870;B3KNX9	O95870-2;O95870;B3KNX9	5;5;3	5;5;3	5;5;3	0	39011000	0	Abhydrolase domain-containing protein 16A	ABHD16A;BAT5	;;	3	5	5	5	3	3	1	3	3	1	3	3	1	11	11	11	59.382	525	525;558;339	1	25	0	4.0677	5.9	6.1	2.3	292220000	22180000	36468000	11100000	1	1	0	6
O95881;V9GY50;V9GYV4	O95881	7;1;1	7;1;1	7;1;1	497770000	482900000	506800000	Thioredoxin domain-containing protein 12	TXNDC12		3	7	7	7	4	6	6	4	6	6	4	6	6	62.8	62.8	62.8	19.206	172	172;55;56	1	98	0	28.24	30.8	57.6	57.6	5705300000	478430000	520630000	549760000	5	6	4	60
O96005;F5H8J3;B4DDS3;K7EQQ1;K7EJ16;K7ERL5	O96005;F5H8J3;B4DDS3	17;15;14;5;3;2	17;15;14;5;3;2	17;15;14;5;3;2	489790000	523880000	504630000	Cleft lip and palate transmembrane protein 1	CLPTM1	;;	6	17	17	17	9	11	11	9	11	11	9	11	11	36	36	36	76.096	669	669;655;567;171;152;209	1	150	0	60.748	23.6	25	20.6	6140200000	546780000	428360000	416840000	9	6	5	89
O96007	O96007	3	3	3	42324000	37104000	49248000	Molybdopterin synthase catalytic subunit	MOCS2		1	3	3	3	2	3	2	2	3	2	2	3	2	28.2	28.2	28.2	20.944	188	188	1	36	0	11.384	18.6	28.2	18.6	579680000	46312000	30967000	60239000	1	3	3	24
O96008;O96008-2;K7EJ57;K7EKG4	O96008;O96008-2;K7EJ57	9;8;5;4	9;8;5;4	9;8;5;4	578130000	719150000	645630000	Mitochondrial import receptor subunit TOM40 homolog	TOMM40	;;	4	9	9	9	8	8	7	8	8	7	8	8	7	51.8	51.8	51.8	37.893	361	361;329;214;168	1	146	0	60.285	42.9	45.2	38.8	8293100000	623580000	664830000	542290000	7	9	2	90
O96011-2;O96011;H7C3V6	O96011-2;O96011;H7C3V6	4;4;3	4;4;3	4;4;3	36765000	38683000	33729000	Peroxisomal membrane protein 11B	PEX11B	;;	3	4	4	4	3	4	3	3	4	3	3	4	3	16.3	16.3	16.3	26.724	245	245;259;81	1	43	0.00026954	3.6475	11.8	16.3	11.8	468190000	31638000	44435000	26699000	1	0	0	14
O96019;O96019-2;H7C5S0;C9JQT2;O94805	O96019;O96019-2;H7C5S0	11;9;7;3;1	11;9;7;3;1	11;9;7;3;1	405130000	412260000	376430000	Actin-like protein 6A	ACTL6A	;;	5	11	11	11	9	10	7	9	10	7	9	10	7	39.6	39.6	39.6	47.46	429	429;387;161;50;426	1	142	0	96.433	31.9	37.3	28.4	5105900000	390550000	405590000	282150000	5	8	4	76
P00167-2;P00167;P00167-3;J3KNC7	P00167-2;P00167;P00167-3	5;5;4;1	5;5;4;1	5;5;4;1	333550000	320580000	356250000	Cytochrome b5	CYB5A	;;	4	5	5	5	5	5	5	5	5	5	5	5	5	67.3	67.3	67.3	11.268	98	98;134;124;60	1	99	0	17.954	67.3	67.3	67.3	3900100000	272230000	291510000	333010000	4	5	5	64
P00338;P00338-3;P00338-4;P00338-5;P00338-2;F5GXY2;F5GYU2;F5GXH2;F5H5J4;F5H6W8;F5GZQ4;F5H8H6;F5GXC7;F5GWW2;F5GXU1;F5H5G7;F5H155;G3XAP5;F5H245;Q6ZMR3;P07864	P00338;P00338-3;P00338-4;P00338-5;P00338-2	23;23;19;15;15;10;9;8;6;6;4;3;3;3;2;1;1;1;1;1;1	23;23;19;15;15;10;9;8;6;6;4;3;3;3;2;1;1;1;1;1;1	22;22;18;14;14;10;9;8;6;6;4;3;3;3;2;0;0;0;0;0;0	35460000000	39352000000	34905000000	L-lactate dehydrogenase A chain	LDHA	;;;;	21	23	23	22	23	19	21	23	19	21	22	18	20	77.4	77.4	73.8	36.688	332	332;361;274;241;274;156;144;114;89;94;72;42;45;45;46;183;225;241;318;332;332	1	664	0	323.31	77.4	62.7	71.1	468720000000	41920000000	33001000000	32125000000	44	31	32	525
P00367;B4DGN5;B3KV55;P49448	P00367;B4DGN5;B3KV55;P49448	27;22;20;20	27;22;20;20	27;22;20;20	2284900000	2226800000	2136600000	Glutamate dehydrogenase 1, mitochondrial;Glutamate dehydrogenase 2, mitochondrial	GLUD1;GLUD2	;;;	4	27	27	27	27	24	24	27	24	24	27	24	24	56.3	56.3	56.3	61.397	558	558;425;391;558	1	414	0	224.31	56.3	51.8	53.9	27867000000	2533700000	1991400000	2047300000	26	18	18	244
P00374;B4DDD2;B4DM58;C9JJ68;Q86XF0	P00374;B4DDD2;B4DM58	6;5;4;1;1	6;5;4;1;1	6;5;4;1;1	118840000	174560000	131210000	Dihydrofolate reductase	DHFR	;;	5	6	6	6	5	5	3	5	5	3	5	5	3	44.4	44.4	44.4	21.452	187	187;135;129;114;187	1	42	0	10.598	34.8	34.8	23.5	1314200000	132560000	207830000	91538000	2	4	1	20
P00387-2;P00387;P00387-3;B1AHF3	P00387-2;P00387;P00387-3;B1AHF3	16;16;16;9	16;16;16;9	16;16;16;9	2589500000	2361400000	2533400000	NADH-cytochrome b5 reductase 3;NADH-cytochrome b5 reductase 3 membrane-bound form;NADH-cytochrome b5 reductase 3 soluble form	CYB5R3	;;;	4	16	16	16	16	14	14	16	14	14	16	14	14	77.1	77.1	77.1	31.76	279	279;301;335;147	1	298	0	168.88	77.1	60.6	60.6	30682000000	2890400000	2120800000	2305900000	22	23	18	233
P00390-2;P00390;P00390-3;P00390-4;P00390-5;H0YBD4;E5RI06;H0YC68	P00390-2;P00390;P00390-3;P00390-4;P00390-5	19;19;18;15;14;9;4;3	19;19;18;15;14;9;4;3	19;19;18;15;14;9;4;3	1318700000	1263900000	1310400000	Glutathione reductase, mitochondrial	GSR	;;;;	8	19	19	19	15	16	15	15	16	15	15	16	15	63.7	63.7	63.7	51.7	479	479;522;493;469;440;300;144;131	1	283	0	191.54	57.4	55.3	49.3	15602000000	1457800000	1244100000	1192000000	15	12	13	156
P00395	P00395	2	2	2	52933000	0	0	Cytochrome c oxidase subunit 1	MT-CO1		1	2	2	2	2	1	1	2	1	1	2	1	1	7.6	7.6	7.6	57.041	513	513	1	25	0.0017452	2.6264	7.6	1.6	1.6	570050000	40897000	13628000	13595000	1	0	0	9
P00403	P00403	4	4	4	286390000	302130000	282580000	Cytochrome c oxidase subunit 2	MT-CO2		1	4	4	4	4	4	4	4	4	4	4	4	4	24.7	24.7	24.7	25.565	227	227	1	49	0	21.619	24.7	24.7	24.7	3523100000	291390000	285940000	266900000	4	2	3	33
P00441;H7BYH4	P00441;H7BYH4	7;6	7;6	7;6	2899900000	2904400000	3198100000	Superoxide dismutase [Cu-Zn]	SOD1	;	2	7	7	7	7	7	7	7	7	7	7	7	7	64.9	64.9	64.9	15.936	154	154;135	1	180	0	156.58	64.9	64.9	64.9	36081000000	2770900000	2652800000	2911400000	12	11	14	168
P00491;G3V5M2;G3V2H3;G3V393	P00491;G3V5M2	19;12;7;3	19;12;7;3	19;12;7;3	3684000000	4113200000	3867800000	Purine nucleoside phosphorylase	PNP	;	4	19	19	19	17	17	17	17	17	17	17	17	17	84.4	84.4	84.4	32.118	289	289;221;93;61	1	357	0	289.54	74.7	74.7	74.7	48275000000	3605000000	3992600000	3841600000	27	28	24	300
P00492;Q9NRG1-2;Q9NRG1	P00492	13;1;1	13;1;1	13;1;1	1400500000	1363200000	1557800000	Hypoxanthine-guanine phosphoribosyltransferase	HPRT1		3	13	13	13	12	13	13	12	13	13	12	13	13	79.4	79.4	79.4	24.579	218	218;190;225	1	190	0	80.95	72.9	79.4	79.4	17723000000	1471400000	1358900000	1427900000	8	14	9	122
P00505;P00505-2	P00505;P00505-2	24;20	24;20	24;20	3708400000	3447500000	3458500000	Aspartate aminotransferase, mitochondrial	GOT2	;	2	24	24	24	22	17	22	22	17	22	22	17	22	64.4	64.4	64.4	47.517	430	430;387	1	353	0	195.93	52.3	40.7	60.7	43253000000	3618300000	2841900000	2900200000	18	14	15	188
P00533;E9PFD7;Q504U8;P00533-4;P00533-3;P00533-2;C9JYS6;J3KTI5;B4DTR1;J3QLU9;P04626-3;P04626-2;P04626-5;P04626-4;P04626	P00533;E9PFD7;Q504U8;P00533-4;P00533-3	31;30;25;18;18;13;5;1;1;1;1;1;1;1;1	31;30;25;18;18;13;5;1;1;1;1;1;1;1;1	29;28;23;18;18;13;5;0;0;0;0;0;0;0;0	1111700000	1176800000	1177600000	Epidermal growth factor receptor;Receptor protein-tyrosine kinase	EGFR	;;;;	15	31	31	29	24	24	20	24	24	20	23	22	18	36.1	36.1	34.2	134.28	1210	1210;1157;1091;628;705;405;128;251;979;1055;569;645;1225;1240;1255	1	385	0	148.17	28.1	27.5	20	14163000000	1172000000	1207500000	994140000	19	13	13	199
P00558;B7Z7A9;E7ERH5	P00558;B7Z7A9;E7ERH5	34;32;21	34;32;21	29;28;18	28125000000	30091000000	29249000000	Phosphoglycerate kinase 1	PGK1	;;	3	34	34	29	33	33	33	33	33	33	28	28	28	80.1	80.1	70.3	44.614	417	417;389;281	1	811	0	323.31	80.1	80.1	80.1	360080000000	28336000000	28639000000	28744000000	51	46	56	639
P00918;E5RID5;E5RK37	P00918;E5RID5;E5RK37	4;2;2	4;2;2	4;2;2	18174000	41633000	42561000	Carbonic anhydrase 2	CA2	;;	3	4	4	4	2	3	2	2	3	2	2	3	2	21.5	21.5	21.5	29.246	260	260;97;101	1	30	0	7.7114	10.8	14.2	8.1	463820000	23152000	51422000	38011000	0	2	1	13
P00966;Q5T6L5;Q5T6L6	P00966;Q5T6L5;Q5T6L6	4;2;2	4;2;2	4;2;2	0	51930000	41399000	Argininosuccinate synthase	ASS1	;;	3	4	4	4	2	3	3	2	3	3	2	3	3	13.1	13.1	13.1	46.53	412	412;179;198	1	31	0	4.6361	5.3	10.9	10	509520000	17711000	55939000	24680000	2	1	2	20
P01024;M0QXZ3;M0QYC8	P01024	15;2;1	15;2;1	12;1;1	148330000	177960000	131900000	Complement C3;Complement C3 beta chain;C3-beta-c;Complement C3 alpha chain;C3a anaphylatoxin;Acylation stimulating protein;Complement C3b alpha chain;Complement C3c alpha chain fragment 1;Complement C3dg fragment;Complement C3g fragment;Complement C3d fragment;Complement C3f fragment;Complement C3c alpha chain fragment 2	C3		3	15	15	12	11	7	9	11	7	9	9	6	8	10.9	10.9	9.1	187.15	1663	1663;100;192	1	113	0	26.297	7.9	5.4	6.5	2040800000	155570000	204590000	224920000	4	3	3	39
P01111;G3V4K2;G3V5T7	P01111	6;1;1	6;1;1	1;0;0	408880000	442400000	420760000	GTPase NRas	NRAS		3	6	6	1	5	6	6	5	6	6	1	1	1	44.4	44.4	4.8	21.229	189	189;43;75	1	82	0	31.914	36.5	44.4	44.4	5034500000	385790000	442900000	409070000	7	5	5	52
P01112;P01112-2	P01112;P01112-2	6;5	2;2	1;1	0	0	19883000	GTPase HRas;GTPase HRas, N-terminally processed	HRAS	;	2	6	2	1	4	5	6	1	1	2	0	0	1	46	12.7	4.8	21.298	189	189;170	1	13	0	5.6958	33.3	41.3	46	173000000	20070000	10432000	18586000	1	0	1	6
P01891;P30459;P16189;P16190;P30512;P10314	P01891;P30459;P16189;P16190;P30512;P10314	21;12;12;11;11;11	21;12;12;11;11;11	3;0;0;0;0;0	9548400000	9591600000	10494000000	HLA class I histocompatibility antigen, A-68 alpha chain;HLA class I histocompatibility antigen, A-74 alpha chain;HLA class I histocompatibility antigen, A-31 alpha chain;HLA class I histocompatibility antigen, A-33 alpha chain;HLA class I histocompatibility antigen, A-29 alpha chain;HLA class I histocompatibility antigen, A-32 alpha chain	HLA-A	;;;;;	6	21	21	3	21	19	18	21	19	18	3	3	2	54.8	54.8	7.1	40.908	365	365;365;365;365;365;365	1	537	0	323.31	54.8	53.4	52.9	129710000000	10019000000	9899500000	9872400000	31	33	33	439
P02462-2;P02462;P29400;P29400-2	P02462-2;P02462;P29400;P29400-2	2;2;1;1	2;2;1;1	2;2;1;1	69318000	37535000	108470000	Collagen alpha-1(IV) chain;Arresten;Collagen alpha-5(IV) chain	COL4A1;COL4A5	;;;	4	2	2	2	2	2	2	2	2	2	2	2	2	2.2	2.2	2.2	127.98	1318	1318;1669;1685;1691	1	30	0	7.8963	2.2	2.2	2.2	801540000	64392000	18520000	102320000	1	1	2	15
P02545-2;Q5TCI8	P02545-2;Q5TCI8	51;40	1;1	1;1	268430000	222110000	319740000	Prelamin-A/C;Lamin-A/C	LMNA	;	2	51	1	1	48	48	48	1	1	1	1	1	1	77.4	4.5	4.5	65.134	572	572;491	1	48	0	18.906	73.8	74.8	75.9	2823500000	283560000	236030000	292280000	3	3	5	37
P02786;G3V0E5;F5H6B1;H7C3V5;F8WBE5	P02786;G3V0E5;F5H6B1	29;26;18;5;3	29;26;18;5;3	29;26;18;5;3	2612200000	2777900000	2602900000	Transferrin receptor protein 1;Transferrin receptor protein 1, serum form	TFRC	;;	5	29	29	29	28	28	26	28	28	26	28	28	26	46.2	46.2	46.2	84.87	760	760;679;478;118;81	1	480	0	248.58	44.6	44.6	42.2	31598000000	2602500000	2690900000	2239000000	28	22	24	299
P02792	P02792	12	12	12	1974700000	1766900000	1825500000	Ferritin light chain	FTL		1	12	12	12	9	10	11	9	10	11	9	10	11	62.9	62.9	62.9	20.019	175	175	1	245	0	47.469	54.9	55.4	55.4	21773000000	2038900000	1732700000	1796700000	13	6	11	122
P02794;G3V192;G3V1D1;E9PRK8;E9PKY7;E9PPQ4;E9PQR3;E9PKM5;E9PK45	P02794;G3V192;G3V1D1	11;9;8;4;4;3;2;2;2	11;9;8;4;4;3;2;2;2	11;9;8;4;4;3;2;2;2	9589400000	10031000000	9907700000	Ferritin heavy chain;Ferritin heavy chain, N-terminally processed;Ferritin	FTH1	;;	9	11	11	11	11	11	11	11	11	11	11	11	11	71.6	71.6	71.6	21.225	183	183;153;113;95;114;58;50;81;102	1	303	0	138.91	71.6	71.6	71.6	118980000000	10548000000	9036300000	8359300000	22	21	17	258
P04040	P04040	17	17	17	545420000	611500000	579100000	Catalase	CAT		1	17	17	17	13	9	12	13	9	12	13	9	12	39.5	39.5	39.5	59.755	527	527	1	165	0	57.711	30.2	21.1	28.1	6908900000	603050000	465550000	649180000	8	5	2	65
P04062-4;P04062-2;P04062;F5H241;P04062-5;P04062-3	P04062-4;P04062-2;P04062;F5H241;P04062-5;P04062-3	18;18;18;17;17;11	18;18;18;17;17;11	18;18;18;17;17;11	1512900000	1650500000	1640800000	Glucosylceramidase	GBA	;;;;;	6	18	18	18	18	14	13	18	14	13	18	14	13	54.8	54.8	54.8	50.316	449	449;516;536;423;487;263	1	278	0	161.73	54.8	36.7	37	20232000000	1622700000	1599000000	1289800000	19	13	10	187
P04075;P04075-2;J3KPS3;H3BQN4;H3BPS8;H3BUH7;H3BR04;H3BMQ8;H3BU78;H3BR68;Q5T7D5;P05062	P04075;P04075-2;J3KPS3;H3BQN4;H3BPS8	37;36;35;34;22;17;17;16;14;11;1;1	37;36;35;34;22;17;17;16;14;11;1;1	29;28;29;26;15;15;15;14;12;10;0;0	45994000000	43132000000	44508000000	Fructose-bisphosphate aldolase A;Fructose-bisphosphate aldolase	ALDOA	;;;;	12	37	37	29	33	31	33	33	31	33	25	25	26	90.9	90.9	77.2	39.42	364	364;418;368;361;278;155;162;140;204;130;223;364	1	964	0	323.31	89.8	89	89.8	557710000000	46888000000	38938000000	42656000000	70	67	75	871
P04080	P04080	6	6	6	861260000	925590000	784530000	Cystatin-B	CSTB		1	6	6	6	5	4	5	5	4	5	5	4	5	79.6	79.6	79.6	11.139	98	98	1	121	0	39.332	79.6	70.4	79.6	10292000000	918900000	828870000	760820000	7	7	6	73
P04083;Q5T3N1;Q5T3N0	P04083	26;11;8	26;11;8	26;11;8	19481000000	18975000000	19948000000	Annexin A1	ANXA1		3	26	26	26	25	22	25	25	22	25	25	22	25	72.5	72.5	72.5	38.714	346	346;204;115	1	623	0	323.31	71.1	67.6	72.5	236500000000	21883000000	16358000000	18889000000	45	38	41	522
P04114	P04114	4	3	3	0	36241000	34183000	Apolipoprotein B-100;Apolipoprotein B-48	APOB		1	4	3	3	1	2	3	1	2	3	1	2	3	1	0.7	0.7	515.6	4563	4563	1	21	0	5.2479	0.2	0.4	0.7	404060000	24374000	32441000	34440000	1	1	2	14
P04150-9;P04150-2;P04150-6;P04150-8;P04150-10;P04150;P04150-3;P04150-7;P04150-5;B7Z7I2;D6RDA9;Q3MSN4	P04150-9;P04150-2;P04150-6;P04150-8;P04150-10;P04150;P04150-3;P04150-7;P04150-5	5;5;5;5;5;5;5;3;3;2;1;1	5;5;5;5;5;5;5;3;3;2;1;1	5;5;5;5;5;5;5;3;3;2;1;1	57639000	75167000	69235000	Glucocorticoid receptor	NR3C1	;;;;;;;;	12	5	5	5	3	4	4	3	4	4	3	4	4	9.5	9.5	9.5	78.695	716	716;742;743;751;751;777;778;558;593;380;144;145	1	55	0	7.8678	6	8	8.1	854880000	49029000	64140000	67752000	1	1	1	10
P04179;P04179-4;F5H4R2;F5GYZ5;P04179-2;F5H3C5;P04179-3;G8JLJ2;G5E9P6;F5GXZ9	P04179;P04179-4;F5H4R2;F5GYZ5;P04179-2;F5H3C5;P04179-3;G8JLJ2	12;11;10;10;10;9;7;6;3;3	12;11;10;10;10;9;7;6;3;3	12;11;10;10;10;9;7;6;3;3	10505000000	11468000000	11038000000	Superoxide dismutase [Mn], mitochondrial	SOD2	;;;;;;;	10	12	12	12	12	12	11	12	12	11	12	12	11	66.2	66.2	66.2	24.722	222	222;176;183;190;183;111;162;61;140;141	1	315	0	323.31	66.2	66.2	55	136570000000	10853000000	10608000000	10191000000	19	27	17	281
P04181;P04181-2	P04181;P04181-2	5;4	5;4	5;4	44608000	48176000	46205000	Ornithine aminotransferase, mitochondrial;Ornithine aminotransferase, hepatic form;Ornithine aminotransferase, renal form	OAT	;	2	5	5	5	5	2	3	5	2	3	5	2	3	16.4	16.4	16.4	48.534	439	439;301	1	45	0	9.4224	16.4	6.6	11.2	554100000	58449000	30062000	26822000	2	1	1	17
P04183;K7ERV3;K7ES52;K7ERJ1;K7ENW5	P04183;K7ERV3;K7ES52;K7ERJ1	9;8;6;6;3	9;8;6;6;3	9;8;6;6;3	93912000	139360000	107100000	Thymidine kinase, cytosolic;Thymidine kinase	TK1	;;;	5	9	9	9	6	6	4	6	6	4	6	6	4	50	50	50	25.468	234	234;267;180;187;87	1	86	0	19.894	34.2	33.8	21.8	1490700000	81248000	132700000	69995000	1	2	0	27
P04259	P04259	21	7	0	0	42052000	0	Keratin, type II cytoskeletal 6B	KRT6B		1	21	7	0	14	13	10	3	2	0	0	0	0	36.3	16.8	0	60.066	564	564	1	40	0	13.716	21.6	19.5	15.2	685800000	31937000	17970000	0	0	1	0	18
P04406;P04406-2;E7EUT5	P04406;P04406-2;E7EUT5	21;18;17	21;18;17	20;17;16	94721000000	90205000000	89335000000	Glyceraldehyde-3-phosphate dehydrogenase	GAPDH	;;	3	21	21	20	21	21	20	21	21	20	20	20	19	82.1	82.1	80	36.053	335	335;293;260	1	1728	0	323.31	82.1	82.1	73.7	1313300000000	113360000000	77086000000	91417000000	133	108	124	1580
P04632;K7ELJ7;U3KQE2;K7EM73;K7EIV0;U3KPR7;K7ES78;K7EMQ1;Q96L46	P04632;K7ELJ7;U3KQE2;K7EM73;K7EIV0	11;10;7;7;7;4;2;2;2	11;10;7;7;7;4;2;2;2	3;3;2;3;3;0;0;0;0	2166800000	2390000000	2349400000	Calpain small subunit 1	CAPNS1	;;;;	9	11	11	3	10	10	10	10	10	10	2	2	2	77.6	77.6	23.1	28.315	268	268;278;161;163;196;100;72;94;248	1	232	0	323.31	69	69	69	29172000000	2370500000	1749500000	1829700000	15	8	13	153
P04792;F8WE04;C9J3N8	P04792;F8WE04	16;9;2	16;9;2	16;9;2	9502100000	10258000000	9985000000	Heat shock protein beta-1	HSPB1	;	3	16	16	16	16	16	15	16	16	15	16	16	15	84.9	84.9	84.9	22.782	205	205;186;37	1	361	0	323.31	84.9	84.9	84.9	117100000000	9538200000	9333500000	9236600000	26	28	24	348
P04818;P04818-2;P04818-3	P04818;P04818-2	5;3;2	5;3;2	5;3;2	47895000	63713000	69864000	Thymidylate synthase	TYMS	;	3	5	5	5	4	2	2	4	2	2	4	2	2	20.1	20.1	20.1	35.716	313	313;279;230	1	33	0	9.0524	16.6	10.2	10.2	684390000	77096000	47391000	59307000	0	0	0	9
P04843;B7Z4L4;F8WF32	P04843;B7Z4L4	36;28;5	36;28;5	36;28;5	9805100000	9151900000	9647600000	Dolichyl-diphosphooligosaccharide--protein glycosyltransferase subunit 1	RPN1	;	3	36	36	36	35	36	35	35	36	35	35	36	35	67.9	67.9	67.9	68.569	607	607;435;121	1	652	0	323.31	66.7	67.9	67.9	116750000000	9744800000	8924800000	8678500000	43	43	35	507
P04844;P04844-2;Q5JYR7;Q5JYR4;F2Z3K5;Q5JYR3;H0Y5M1	P04844;P04844-2	21;20;8;7;5;4;3	21;20;8;7;5;4;3	21;20;8;7;5;4;3	4383600000	4492300000	4358300000	Dolichyl-diphosphooligosaccharide--protein glycosyltransferase subunit 2	RPN2	;	7	21	21	21	21	17	19	21	17	19	21	17	19	51	51	51	69.283	631	631;615;344;166;162;138;147	1	425	0	323.31	51	38.7	45.2	52991000000	5906900000	3651600000	3927400000	35	30	32	377
P04899;P04899-4;P04899-6;P04899-3;P04899-5;P04899-2;F5GZL8	P04899;P04899-4;P04899-6;P04899-3;P04899-5;P04899-2;F5GZL8	16;15;14;14;14;14;12	16;15;14;14;14;14;12	8;8;8;8;8;8;6	1727700000	1727800000	1818500000	Guanine nucleotide-binding protein G(i) subunit alpha-2	GNAI2	;;;;;;	7	16	16	8	14	13	14	14	13	14	7	7	7	61.1	61.1	36.1	40.45	355	355;366;303;318;339;339;274	1	269	0	155.99	54.9	51.8	53.5	20972000000	1671900000	1258000000	1832800000	16	12	10	177
P05023-4;P05023;P05023-3;P05023-2;B1AKY9;P50993;H0Y7C1;Q13733;Q5TC01;P20648;Q5TC02;E9PRA5;Q5TC05;M0QXF2	P05023-4;P05023;P05023-3;P05023-2	44;44;39;30;15;15;13;9;5;5;4;4;2;1	44;44;39;30;15;15;13;9;5;5;4;4;2;1	28;28;23;24;2;2;2;1;4;0;4;1;1;0	4191200000	4103900000	4356500000	Sodium/potassium-transporting ATPase subunit alpha-1	ATP1A1	;;;	14	44	44	28	40	35	37	40	35	37	26	22	25	48.2	48.2	29.8	113	1023	1023;1023;992;681;1009;1020;714;1029;144;1035;106;517;157;178	1	641	0	323.31	46.3	37.7	41.1	52491000000	4773100000	3691700000	4038500000	36	30	31	402
P05091-2;P05091;S4R3S4;F8VP50	P05091-2;P05091	11;11;4;3	10;10;4;3	10;10;4;3	274180000	300370000	263910000	Aldehyde dehydrogenase, mitochondrial	ALDH2	;	4	11	10	10	9	9	7	8	8	6	8	8	6	29.6	27.9	27.9	50.989	470	470;517;117;261	1	91	0	28.558	24.5	23.8	19.6	3308000000	207580000	432870000	210300000	3	4	4	54
P05120;E7ERB5;E7EPJ9;E9PDK7;H7C004;H7BYS2	P05120	9;4;4;3;1;1	9;4;4;3;1;1	9;4;4;3;1;1	183840000	169700000	137530000	Plasminogen activator inhibitor 2	SERPINB2		6	9	9	9	7	6	4	7	6	4	7	6	4	29.6	29.6	29.6	46.596	415	415;132;161;113;253;280	1	75	0	33.014	21.4	18.8	8.9	2032800000	185690000	158790000	60447000	3	1	1	25
P05141;Q9H0C2	P05141	15;3	6;0	6;0	2153700000	1853700000	2057400000	ADP/ATP translocase 2;ADP/ATP translocase 2, N-terminally processed	SLC25A5		2	15	6	6	15	15	15	6	6	6	6	6	6	45.3	19.5	19.5	32.852	298	298;315	1	158	0	50.873	45.3	45.3	45.3	25122000000	1995600000	1881500000	2047200000	8	6	7	95
P05161	P05161	13	13	13	32067000000	33555000000	29720000000	Ubiquitin-like protein ISG15	ISG15		1	13	13	13	10	11	12	10	11	12	10	11	12	85.5	85.5	85.5	17.887	165	165	1	719	0	323.31	77	85.5	72.7	408310000000	32860000000	31907000000	28857000000	59	44	52	654
P05187;P10696;P09923	P05187;P10696	9;5;1	9;5;1	9;5;1	90229000	88789000	145070000	Alkaline phosphatase, placental type;Alkaline phosphatase, placental-like	ALPP;ALPPL2	;	3	9	9	9	6	5	7	6	5	7	6	5	7	26.9	26.9	26.9	57.953	535	535;532;528	1	70	0	22.73	16.8	15.7	19.1	1211700000	95731000	95657000	152220000	0	1	3	21
P05198;G3V4T5;H0YJS4	P05198;G3V4T5;H0YJS4	23;19;18	23;19;18	23;19;18	2524100000	2682700000	2711500000	Eukaryotic translation initiation factor 2 subunit 1	EIF2S1	;;	3	23	23	23	22	23	20	22	23	20	22	23	20	69.8	69.8	69.8	36.112	315	315;273;252	1	397	0	323.31	69.5	69.8	64.4	32796000000	2628900000	2760300000	2376800000	21	24	17	246
P05204	P05204	2	2	1	0	1476600000	1414200000	Non-histone chromosomal protein HMG-17	HMGN2		1	2	2	1	2	2	1	2	2	1	1	1	0	23.3	23.3	13.3	9.3926	90	90	1	29	0	8.2253	23.3	23.3	10	8614700000	519130000	1040000000	992520000	2	2	1	22
P05362;E7ESS4;K7EKL8	P05362	13;6;5	13;6;5	13;6;5	320790000	330420000	341240000	Intercellular adhesion molecule 1	ICAM1		3	13	13	13	10	9	9	10	9	9	10	9	9	33.5	33.5	33.5	57.825	532	532;310;180	1	138	0	56.017	27.4	25.4	24.4	4122900000	270810000	284470000	276330000	7	6	3	68
P05386	P05386	3	2	2	1540700000	1498900000	1648100000	60S acidic ribosomal protein P1	RPLP1		1	3	2	2	3	3	3	2	2	2	2	2	2	66.7	51.8	51.8	11.514	114	114	1	52	0	75.101	66.7	66.7	66.7	18247000000	1531300000	1361100000	1464000000	5	5	6	65
P05387;H0YDD8;P05386-2	P05387	9;3;1	9;3;1	8;2;0	5222000000	5127900000	5728300000	60S acidic ribosomal protein P2	RPLP2		3	9	9	8	8	9	9	8	9	9	7	8	8	92.2	92.2	77.4	11.665	115	115;92;89	1	197	0	181.83	85.2	92.2	92.2	62323000000	5263600000	4960900000	5240100000	18	19	15	204
P05388;F8VWS0;Q3B7A4;F8VU65;F8VW21;F8VPE8;G3V210;F8VZS0;F8VQY6;F8VRK7;Q8NHW5;F8VS58;F8VWV4;F8W1K8	P05388;F8VWS0;Q3B7A4;F8VU65;F8VW21;F8VPE8;G3V210;F8VZS0;F8VQY6;F8VRK7;Q8NHW5;F8VS58	13;12;12;11;10;9;9;9;8;8;8;7;6;3	13;12;12;11;10;9;9;9;8;8;8;7;6;3	13;12;12;11;10;9;9;9;8;8;8;7;6;3	6301700000	6937300000	7046200000	60S acidic ribosomal protein P0;60S acidic ribosomal protein P0-like	RPLP0;RPLP0P6	;;;;;;;;;;;	14	13	13	13	13	13	13	13	13	13	13	13	13	58	58	58	34.273	317	317;281;255;247;244;153;166;246;142;156;317;121;111;107	1	238	0	201.84	58	58	58	79780000000	6345800000	6427500000	6753400000	17	16	19	242
P05455;E7ERC4;E9PFL9;E9PGX9	P05455;E7ERC4	27;17;12;10	27;17;12;10	27;17;12;10	2061600000	2063000000	1974600000	Lupus La protein	SSB	;	4	27	27	27	22	24	23	22	24	23	22	24	23	59.3	59.3	59.3	46.836	408	408;184;134;120	1	400	0	141.69	52.2	53.9	54.2	23490000000	2089200000	1903900000	1764000000	18	19	19	228
P05556;P05556-2;P05556-5;P05556-4;P05556-3;E7EQW5;C9JPK5;Q5T3E6;E9PLR6;E7EUI6;E7ERX5;C9JJP8;Q5T3E5;E9PQJ2;H7C4N8;C9JNE0	P05556;P05556-2;P05556-5;P05556-4;P05556-3	24;22;22;22;22;7;6;6;6;6;5;4;4;4;3;1	24;22;22;22;22;7;6;6;6;6;5;4;4;4;3;1	24;22;22;22;22;7;6;6;6;6;5;4;4;4;3;1	4639600000	4830200000	4467300000	Integrin beta-1	ITGB1	;;;;	16	24	24	24	22	22	22	22	22	22	22	22	22	35.2	35.2	35.2	88.414	798	798;789;801;819;825;163;98;136;143;152;124;31;89;104;108;14	1	439	0	233.82	33.1	33.5	34.3	56385000000	4821900000	4591100000	4288100000	25	27	22	321
P06132;H0Y5R6;Q5T446	P06132;H0Y5R6	10;6;4	10;6;4	10;6;4	311680000	303460000	322970000	Uroporphyrinogen decarboxylase	UROD	;	3	10	10	10	8	6	9	8	6	9	8	6	9	41.7	41.7	41.7	40.786	367	367;228;193	1	124	0	53.306	33.5	25.9	37.3	3948100000	357230000	206270000	319520000	4	3	7	65
P06280;V9GYN5	P06280	8;3	8;3	8;3	96890000	71010000	87412000	Alpha-galactosidase A	GLA		2	8	8	8	6	5	5	6	5	5	6	5	5	22.1	22.1	22.1	48.766	429	429;222	1	56	0	14.144	17.2	14.9	13.8	1054300000	122030000	85219000	84001000	2	1	2	22
P06493;P06493-2;E5RIU6;K7ELV5;G3V317;J3QSD7;Q96Q40-2;Q96Q40-4;Q96Q40-3;Q96Q40-5;Q96Q40;Q07002;Q07002-2;Q07002-3;Q9NYV4-3;Q14004-2;Q14004	P06493;P06493-2;E5RIU6	13;10;9;2;1;1;1;1;1;1;1;1;1;1;1;1;1	13;10;9;2;1;1;1;1;1;1;1;1;1;1;1;1;1	11;9;7;0;0;0;0;0;0;0;0;0;0;0;0;0;0	737660000	759230000	699170000	Cyclin-dependent kinase 1	CDK1	;;	17	13	13	11	9	9	9	9	9	9	7	7	7	54.5	54.5	48.1	34.095	297	297;240;189;164;39;1201;358;384;400;429;435;472;474;504;1273;1452;1512	1	150	0	41.493	35	37	33.3	9033100000	533920000	545350000	641940000	6	5	7	88
P06576;H0YH81;F8W0P7	P06576;H0YH81	26;21;9	26;21;9	2;2;2	15986000000	15074000000	15784000000	ATP synthase subunit beta, mitochondrial;ATP synthase subunit beta	ATP5B	;	3	26	26	2	25	23	23	25	23	23	2	1	1	72.4	72.4	5.7	56.559	529	529;362;270	1	724	0	323.31	67.9	63.5	63.5	197410000000	18883000000	13721000000	15227000000	57	48	52	625
P06702	P06702	3	3	3	27258000	0	0	Protein S100-A9	S100A9		1	3	3	3	2	0	0	2	0	0	2	0	0	33.3	33.3	33.3	13.242	114	114	1	10	0	46.629	26.3	0	0	149020000	24627000	0	0	1	0	0	5
P06733;K7EM90	P06733	27;11	27;11	7;7	57455000000	59115000000	56496000000	Alpha-enolase	ENO1		2	27	27	7	24	24	27	24	24	27	7	7	7	68	68	12	47.168	434	434;195	1	1497	0	323.31	61.3	61.3	68	731800000000	61705000000	57419000000	56506000000	110	105	107	1374
P06737-2;P06737;E9PK47	P06737-2;P06737;E9PK47	37;37;35	37;37;35	30;30;28	1790700000	1867900000	1928100000	Glycogen phosphorylase, liver form;Alpha-1,4 glucan phosphorylase	PYGL	;;	3	37	37	30	30	30	33	30	30	33	23	25	26	50.7	50.7	42.8	93.133	813	813;847;819	1	514	0	195.73	43.2	44.2	45	22325000000	1838200000	1773200000	1861700000	21	25	21	278
P06744;P06744-2;K7EQ48;K7EPY4;K7EP41;K7ELR7;K7ENA0;K7ERC6;K7ERK8;K7ESF4;K7EIL4;Q8N196	P06744;P06744-2;K7EQ48	22;21;19;7;6;4;4;3;2;2;1;1	22;21;19;7;6;4;4;3;2;2;1;1	16;15;14;6;5;3;4;3;2;2;1;1	11656000000	11341000000	11252000000	Glucose-6-phosphate isomerase	GPI	;;	12	22	22	16	17	20	19	17	20	19	12	14	13	51.6	51.6	38.2	63.146	558	558;569;474;166;159;146;162;161;133;209;110;739	1	420	0	323.31	38.2	44.3	44.1	140350000000	12065000000	10346000000	9082100000	24	31	29	357
P06748;P06748-3;P06748-2;E5RI98;E5RGW4	P06748;P06748-3;P06748-2	12;11;11;3;1	12;11;11;3;1	12;11;11;3;1	10385000000	11014000000	11094000000	Nucleophosmin	NPM1	;;	5	12	12	12	12	12	12	12	12	12	12	12	12	50	50	50	32.575	294	294;259;265;111;59	1	291	0	206.84	50	50	50	123630000000	10808000000	11577000000	10101000000	22	22	16	235
P06753-2;Q5VU59;P06753-3;Q5VU61;D6R904;D6RFM2	P06753-2;Q5VU59;P06753-3;Q5VU61	26;24;22;21;10;3	26;24;22;21;10;3	0;0;0;0;0;0	11439000000	11430000000	12858000000		DKFZp686J1372;TPM3	;;;	6	26	26	0	24	24	25	24	24	25	0	0	0	73.4	73.4	0	29.032	248	248;232;247;223;95;49	1	541	0	152.36	69.8	69.8	70.6	141290000000	11188000000	11028000000	10678000000	25	21	28	292
P06756-3;P06756-2;P06756;H7BZG1	P06756-3;P06756-2;P06756	21;21;21;3	21;21;21;3	21;21;21;3	552870000	544160000	557600000	Integrin alpha-V;Integrin alpha-V heavy chain;Integrin alpha-V light chain	ITGAV	;;	4	21	21	21	15	18	15	15	18	15	15	18	15	28.6	28.6	28.6	111.13	1002	1002;1012;1048;136	1	260	0	76.502	20.6	23.5	21.6	7549100000	450250000	578250000	549370000	11	10	10	122
P07093-2;P07093;P07093-3;C9JN98	P07093-2;P07093;P07093-3;C9JN98	8;8;8;4	8;8;8;4	8;8;8;4	145920000	168410000	148620000	Glia-derived nexin	SERPINE2	;;;	4	8	8	8	6	6	8	6	6	8	6	6	8	23.9	23.9	23.9	44	397	397;398;409;275	1	81	0	14.102	18.4	18.9	23.9	1891800000	142510000	144720000	163240000	1	3	2	21
P07099;B1AQP9;B1AQP8	P07099	24;8;6	24;8;6	24;8;6	2506800000	2556200000	2576500000	Epoxide hydrolase 1	EPHX1		3	24	24	24	23	23	23	23	23	23	23	23	23	65.3	65.3	65.3	52.948	455	455;161;136	1	371	0	259.72	63.3	65.1	65.3	31861000000	2492700000	2605100000	2435000000	19	18	20	229
P07108;P07108-3;P07108-2;P07108-4;P07108-5;P07108-6	P07108;P07108-3;P07108-2;P07108-4;P07108-5	7;6;6;6;6;2	7;6;6;6;6;2	7;6;6;6;6;2	1870200000	1953000000	2327800000	Acyl-CoA-binding protein	DBI	;;;;	6	7	7	7	5	5	5	5	5	5	5	5	5	72.4	72.4	72.4	10.044	87	87;88;104;129;148;123	1	141	0	100.29	58.6	58.6	58.6	24566000000	2333800000	1820800000	2205900000	5	5	8	78
P07195;A8MW50;C9J7H8;F5H793	P07195;A8MW50	21;11;10;9	20;10;10;9	20;10;10;9	22657000000	21914000000	23122000000	L-lactate dehydrogenase B chain;L-lactate dehydrogenase	LDHB	;	4	21	20	20	20	17	17	19	16	16	19	16	16	60.8	57.2	57.2	36.638	334	334;232;136;102	1	501	0	323.31	60.8	48.8	54.8	282050000000	23930000000	19806000000	21701000000	36	29	32	403
P07203;P07203-2	P07203	7;1	7;1	7;1	148670000	145600000	135160000	Glutathione peroxidase 1	GPX1		2	7	7	7	5	6	4	5	6	4	5	6	4	54.2	54.2	54.2	22.088	203	203;98	1	67	0	34.33	41.4	43.3	25.6	1865200000	139100000	159770000	91621000	2	2	1	27
P07205	P07205	7	2	2	0	33944000	0	Phosphoglycerate kinase 2	PGK2		1	7	2	2	7	7	6	2	2	1	2	2	1	17.7	3.6	3.6	44.796	417	417	1	20	0.0093671	1.713	17.7	17.7	16.1	351660000	39382000	25720000	16778000	0	1	0	7
P07237;H7BZ94;F5H8J2;H0Y3Z3;I3L398;I3L312;I3L3U6;I3L0S0;I3NI03;I3L4M2;I3L514;I3L3P5;I3L1Y5	P07237;H7BZ94;F5H8J2;H0Y3Z3	35;32;31;19;15;13;10;9;9;8;5;5;2	35;32;31;19;15;13;10;9;9;8;5;5;2	35;32;31;19;15;13;10;9;9;8;5;5;2	19034000000	18897000000	18983000000	Protein disulfide-isomerase	P4HB	;;;	13	35	35	35	34	33	33	34	33	33	34	33	33	69.7	69.7	69.7	57.116	508	508;464;451;274;200;208;188;148;166;117;106;156;54	1	823	0	323.31	66.7	60.8	60.8	237200000000	20354000000	18187000000	17765000000	51	49	51	611
P07305;P07305-2	P07305;P07305-2	4;3	4;3	4;3	288100000	244340000	272100000	Histone H1.0;Histone H1.0, N-terminally processed	H1F0	;	2	4	4	4	4	4	4	4	4	4	4	4	4	21.6	21.6	21.6	20.863	194	194;177	1	69	0	12.539	21.6	21.6	21.6	3033400000	248560000	289800000	273520000	3	2	3	25
P07311;G3V2U7;G3V3F8;G3V597;P07311-2	P07311;G3V2U7	5;4;1;1;1	5;4;1;1;1	5;4;1;1;1	1277400000	1665300000	1416700000	Acylphosphatase-1;Acylphosphatase	ACYP1	;	5	5	5	5	4	4	4	4	4	4	4	4	4	60.6	60.6	60.6	11.261	99	99;129;37;62;55	1	63	0	15.27	44.4	47.5	47.5	19541000000	1491600000	1504200000	1250800000	2	3	4	31
P07339;C9JH19;H7C469;F8WD96;H7C1V0;F8W787	P07339;C9JH19;H7C469;F8WD96	17;11;11;9;7;6	17;11;11;9;7;6	17;11;11;9;7;6	4611600000	4537300000	4462100000	Cathepsin D;Cathepsin D light chain;Cathepsin D heavy chain	CTSD	;;;	6	17	17	17	15	16	15	15	16	15	15	16	15	53.2	53.2	53.2	44.552	412	412;299;379;276;189;199	1	362	0	323.31	49.5	52.2	49.5	55266000000	4508000000	4455000000	3963700000	21	20	20	257
P07355;P07355-2;H0YN42;H0YMD0;H0YMU9;A6NMY6;H0YM50;H0YKS4;H0YNP5;H0YN28;H0YL33;H0YMM1;H0YKZ7;H0YLV6;H0YMT9;H0YKX9;H0YKL9;H0YMW4;H0YNA0;H0YN52;H0YKV8;H0YMD9;H0YNB8;H0YKN4;H0YLE2	P07355;P07355-2;H0YN42;H0YMD0;H0YMU9;A6NMY6;H0YM50;H0YKS4;H0YNP5	29;28;24;23;23;21;20;18;15;13;13;13;11;11;11;11;10;10;9;7;7;6;5;5;2	29;28;24;23;23;21;20;18;15;13;13;13;11;11;11;11;10;10;9;7;7;6;5;5;2	29;28;24;23;23;21;20;18;15;13;13;13;11;11;11;11;10;10;9;7;7;6;5;5;2	39914000000	39872000000	39515000000	Annexin A2;Annexin;Putative annexin A2-like protein	ANXA2;ANXA2P2	;;;;;;;;	25	29	29	29	28	28	28	28	28	28	28	28	28	74.6	74.6	74.6	38.604	339	339;357;256;227;230;339;248;176;175;139;142;149;119;132;133;134;110;146;79;59;81;65;47;69;45	1	622	0	323.31	69.6	72.6	69.6	481750000000	44026000000	32385000000	37445000000	44	42	41	511
P07384;E9PRM1;E9PLX0;E9PJJ3;E9PLC9;E9PMC6;E9PJA6;E9PSA6;E9PQB3;E9PL37;E9PIA9	P07384	31;5;4;4;4;4;4;4;4;4;3	31;5;4;4;4;4;4;4;4;4;3	31;5;4;4;4;4;4;4;4;4;3	1133200000	1184100000	1114300000	Calpain-1 catalytic subunit	CAPN1		11	31	31	31	26	26	22	26	26	22	26	26	22	53.4	53.4	53.4	81.889	714	714;201;122;135;148;152;161;163;191;191;63	1	369	0	144.55	47.9	41.2	41	13658000000	1264100000	1061400000	867930000	16	17	8	193
P07686;Q5URX0;H0YA83;H0Y9B6;D6REQ8;H0Y9M3	P07686;Q5URX0	15;12;6;6;1;1	15;12;6;6;1;1	15;12;6;6;1;1	843420000	751970000	775450000	Beta-hexosaminidase subunit beta;Beta-hexosaminidase subunit beta chain B;Beta-hexosaminidase subunit beta chain A	HEXB	;	6	15	15	15	14	14	12	14	14	12	14	14	12	37.1	37.1	37.1	63.111	556	556;331;170;202;35;52	1	211	0	60.552	32.9	32.2	26.3	9789400000	943370000	701760000	756470000	12	11	7	135
P07711;Q5T8F0;Q5QP40;P43235;O60911	P07711;Q5T8F0	8;4;1;1;1	8;4;1;1;1	7;3;0;0;0	1434400000	1393000000	1526700000	Cathepsin L1;Cathepsin L1 heavy chain;Cathepsin L1 light chain	CTSL	;	5	8	8	7	7	7	7	7	7	7	6	6	6	41.1	41.1	39	37.564	333	333;225;258;329;334	1	124	0	88.105	34.2	34.2	34.2	17968000000	1723600000	1622900000	1703800000	9	3	6	75
P07741;H3BQZ9;P07741-2;H3BQB1;H3BQF1;H3BSW3	P07741;H3BQZ9;P07741-2;H3BQB1;H3BQF1	10;8;8;7;6;4	10;8;8;7;6;4	10;8;8;7;6;4	588900000	617740000	532920000	Adenine phosphoribosyltransferase	APRT	;;;;	6	10	10	10	8	8	7	8	8	7	8	8	7	70.6	70.6	70.6	19.608	180	180;153;134;162;148;63	1	119	0	150.55	54.4	60	48.9	6767400000	655830000	569840000	496110000	7	6	3	67
P07814;V9GYZ6;V9GZ76	P07814;V9GYZ6	66;43;5	66;43;5	66;43;5	5910800000	5983300000	5818200000	Bifunctional glutamate/proline--tRNA ligase;Glutamate--tRNA ligase;Proline--tRNA ligase	EPRS	;	3	66	66	66	55	53	56	55	53	56	55	53	56	57.7	57.7	57.7	170.59	1512	1512;968;194	1	980	0	323.31	46.6	47	50.9	72363000000	5473300000	5130100000	5153800000	52	38	46	585
P07858;R4GMQ5;E9PR54;E9PJ67;E9PCB3;E9PKQ7;E9PNL5;E9PHZ5;E9PLY3;E9PSG5;E9PQM1;E9PS78	P07858	8;2;2;2;2;2;2;2;2;2;2;1	8;2;2;2;2;2;2;2;2;2;2;1	8;2;2;2;2;2;2;2;2;2;2;1	521880000	578690000	559240000	Cathepsin B;Cathepsin B light chain;Cathepsin B heavy chain	CTSB		12	8	8	8	8	6	7	8	6	7	8	6	7	31	31	31	37.821	339	339;76;98;101;110;136;143;148;165;170;175;92	1	126	0	38.266	31	20.6	25.7	7115400000	585560000	498380000	516840000	7	5	4	69
P07900;P07900-2;Q86U12;G3V2J8;Q14568;Q58FG0	P07900;P07900-2;Q86U12	45;45;31;10;8;7	28;28;19;5;2;3	27;27;18;5;2;3	16783000000	17014000000	15768000000	Heat shock protein HSP 90-alpha	HSP90AA1	;;	6	45	28	27	43	44	44	26	27	27	25	26	26	57.9	38.7	37.7	84.659	732	732;854;413;174;343;334	1	723	0	323.31	57.4	57.5	57.8	209030000000	17486000000	15114000000	15112000000	55	52	56	666
P07919	P07919	4	4	4	487830000	472330000	297350000	Cytochrome b-c1 complex subunit 6, mitochondrial	UQCRH		1	4	4	4	4	3	4	4	3	4	4	3	4	38.5	38.5	38.5	10.739	91	91	1	61	0	208.03	38.5	38.5	38.5	4966400000	452990000	384810000	341510000	4	4	1	38
P07954-2;P07954	P07954-2;P07954	20;19	20;19	20;19	1394000000	1535300000	1381600000	Fumarate hydratase, mitochondrial	FH	;	2	20	20	20	16	15	17	16	15	17	16	15	17	65.5	65.5	65.5	50.212	467	467;510	1	284	0	261.34	54.8	52.5	55.9	18152000000	1526500000	1575400000	1541200000	20	14	11	189
P08107;P08107-2;E7EP94;V9GZ37	P08107;P08107-2;E7EP94;V9GZ37	40;36;33;29	36;32;31;27	18;15;14;12	21905000000	22564000000	23859000000	Heat shock 70 kDa protein 1A	HSPA1A	;;;	4	40	36	18	33	34	32	29	30	28	14	16	14	72.7	67.4	36.3	70.051	641	641;586;550;476	1	783	0	323.31	64	61.6	60.2	275640000000	19752000000	21594000000	21128000000	55	62	56	705
P08133;P08133-2;E7EMC6	P08133;P08133-2;E7EMC6	31;30;16	31;30;16	1;1;1	1307300000	1300100000	1337700000	Annexin A6;Annexin	ANXA6	;;	3	31	31	1	25	29	28	25	29	28	1	1	1	53.9	53.9	3	75.872	673	673;641;330	1	421	0	142.01	43.8	52.9	50.7	16239000000	1193000000	1275000000	1330800000	21	17	14	197
P08236-2;P08236;F8WBK6;F2Z3L6;P08236-3	P08236-2;P08236;F8WBK6;F2Z3L6;P08236-3	3;3;2;2;2	3;3;2;2;2	3;3;2;2;2	21954000	0	0	Beta-glucuronidase	GUSB	;;;;	5	3	3	3	3	1	1	3	1	1	3	1	1	9	9	9	69.141	600	600;651;134;144;505	1	18	0.00026795	3.5534	9	1.5	1.5	173390000	26783000	8178700	5980600	2	0	0	7
P08237;P08237-3;P08237-2;F8VNX2;F8VZQ1;F8VX13;F8VP00;F8VSL1;F8W1J8;F8VSF7;F8VW30;F8VUB8;F8VYK8;F8VTQ3;F8VZI0;F8VVE3;F8VZ53;F8VSF5;H0YIS9	P08237;P08237-3;P08237-2	27;26;25;7;7;6;6;5;4;4;4;3;3;3;3;2;1;1;1	25;24;24;7;7;6;6;5;4;4;4;3;3;3;3;2;1;1;1	24;23;24;7;7;6;6;5;4;4;4;3;3;3;3;2;1;1;1	1270200000	1420600000	1354400000	ATP-dependent 6-phosphofructokinase, muscle type	PFKM	;;	19	27	25	24	20	18	19	19	17	17	18	16	16	45.9	43.6	42.4	85.182	780	780;851;749;157;161;156;176;139;84;102;116;141;149;149;152;165;59;73;97	1	328	0	248.43	36.3	31	31.9	17153000000	1122200000	1432600000	1252400000	16	10	13	186
P08238	P08238	54	53	20	50363000000	49609000000	50572000000	Heat shock protein HSP 90-beta	HSP90AB1		1	54	53	20	51	51	50	50	50	49	19	17	17	70.4	68.8	32.5	83.263	724	724	1	1641	0	323.31	70.2	66.6	66.6	639040000000	53407000000	48848000000	48304000000	109	105	111	1368
P08240;P08240-2	P08240;P08240-2	17;16	17;16	17;16	544020000	637750000	558950000	Signal recognition particle receptor subunit alpha	SRPR	;	2	17	17	17	14	12	13	14	12	13	14	12	13	31.5	31.5	31.5	69.81	638	638;610	1	213	0	57.102	26.3	23	23.7	6852000000	533280000	433240000	456010000	8	8	6	100
P08243-2;P08243;P08243-3;F8WEJ5;C9J057;C9JT45;C9JM09;C9JLN6	P08243-2;P08243;P08243-3;F8WEJ5	9;9;8;6;4;3;2;1	9;9;8;6;4;3;2;1	9;9;8;6;4;3;2;1	115990000	141230000	146510000	Asparagine synthetase [glutamine-hydrolyzing]	ASNS	;;;	8	9	9	9	7	5	5	7	5	5	7	5	5	25	25	25	62.168	540	540;561;478;401;214;162;118;63	1	79	0	20.581	17.6	14.1	11.5	1658700000	142410000	110310000	134980000	4	2	2	42
P08397-2;P08397;F5H345;F5GY90;P08397-4;P08397-3;F5H226;F5H0P4	P08397-2;P08397;F5H345;F5GY90;P08397-4;P08397-3;F5H226	6;6;5;4;4;4;3;1	6;6;5;4;4;4;3;1	6;6;5;4;4;4;3;1	0	0	42501000	Porphobilinogen deaminase	HMBS	;;;;;;	8	6	6	6	2	2	4	2	2	4	2	2	4	25.6	25.6	25.6	37.699	344	344;361;330;187;304;321;191;119	1	37	0	8.6752	9	8.1	16.6	569210000	17595000	128170000	39430000	1	3	1	17
P08559;P08559-4;P08559-3;P08559-2;Q5JPU3;Q5JPU0;Q5JPT9;Q5JPU1;P29803	P08559;P08559-4;P08559-3;P08559-2	16;16;15;15;4;4;4;4;3	16;16;15;15;4;4;4;4;3	16;16;15;15;4;4;4;4;3	824590000	771340000	753270000	Pyruvate dehydrogenase E1 component subunit alpha, somatic form, mitochondrial	PDHA1	;;;	9	16	16	16	13	12	12	13	12	12	13	12	12	57.2	57.2	57.2	43.295	390	390;428;359;397;109;180;203;205;388	1	195	0	93.257	46.9	37.7	37.2	9894500000	891840000	620090000	625350000	11	10	10	121
P08572	P08572	7	7	7	194590000	214170000	227730000	Collagen alpha-2(IV) chain;Canstatin	COL4A2		1	7	7	7	4	6	6	4	6	6	4	6	6	5.5	5.5	5.5	167.55	1712	1712	1	78	0	13.396	2.9	4.4	4.4	2445600000	132850000	224920000	230450000	2	1	2	21
P08574	P08574	12	12	12	1354600000	1485200000	1434000000	Cytochrome c1, heme protein, mitochondrial	CYC1		1	12	12	12	11	11	9	11	11	9	11	11	9	39.7	39.7	39.7	35.422	325	325	1	190	0	248.01	39.7	37.5	25.2	17233000000	1638100000	1581600000	1204500000	6	12	8	110
P08579	P08579	7	5	5	231610000	268750000	271340000	U2 small nuclear ribonucleoprotein B	SNRPB2		1	7	5	5	7	6	6	5	4	4	5	4	4	32	25.3	25.3	25.486	225	225	1	72	0	17.902	32	28.4	28.4	3060600000	280150000	229150000	215850000	3	3	2	26
P08581;P08581-2;P08581-3;B4DPY6;H7C174;H7C130;C9JKM5;H7C3Z8;H7C074;B4DY49;Q9H3Y6;P42685;P12931;P12931-2;Q04912-2;Q04912	P08581;P08581-2	33;32;15;9;7;2;2;1;1;1;1;1;1;1;1;1	33;32;15;9;7;2;2;1;1;1;1;1;1;1;1;1	33;32;15;9;7;2;2;1;1;1;1;1;1;1;1;1	795020000	774490000	808090000	Hepatocyte growth factor receptor	MET	;	16	33	33	33	26	26	26	26	26	26	26	26	26	30.6	30.6	30.6	155.54	1390	1390;1408;764;260;214;158;190;270;285;363;488;505;536;542;1351;1400	1	341	0	94.174	24	22.2	23	9627400000	701600000	749490000	683610000	16	14	11	178
P08621-2;P08621;P08621-3;M0QYR1;P08621-4;M0QX04	P08621-2;P08621;P08621-3	16;16;9;7;6;2	16;16;9;7;6;2	16;16;9;7;6;2	1365000000	1352000000	1440900000	U1 small nuclear ribonucleoprotein 70 kDa	SNRNP70	;;	6	16	16	16	14	13	15	14	13	15	14	13	15	31.1	31.1	31.1	50.617	428	428;437;166;94;341;33	1	220	0	56.776	30.6	27.1	27.6	16820000000	1617600000	1288200000	1363800000	15	8	11	120
P08648;H0YIV7	P08648	27;4	27;4	27;4	2369800000	2305700000	2367100000	Integrin alpha-5;Integrin alpha-5 heavy chain;Integrin alpha-5 light chain	ITGA5		2	27	27	27	25	20	24	25	20	24	25	20	24	40.1	40.1	40.1	114.54	1049	1049;119	1	395	0	235.33	37	28.2	33.8	29207000000	2561900000	2060100000	2346400000	24	18	20	255
P08651-4;P08651-5;P08651-3;P08651-6;P08651-2;P08651	P08651-4;P08651-5;P08651-3;P08651-6;P08651-2;P08651	4;4;4;4;4;4	4;4;4;4;4;4	3;3;3;3;3;3	0	59801000	66690000	Nuclear factor 1 C-type	NFIC	;;;;;	6	4	4	3	2	3	2	2	3	2	1	2	1	15.8	15.8	13.1	45.412	406	406;428;430;439;499;508	1	27	0	5.2891	5.2	7.9	5.4	655670000	53990000	59760000	56158000	1	1	2	12
[truncated: 2,435 more rows]
