# Supplementary material for: Trimming nano delivery at the cell side by tuning ARF6 GTPases to the GTP-bound form
Source: Research Square preprint supplement (doi:10.21203/rs.3.rs-1884888/v1), 2022-08-11
Supplement: Supplementary file 2 [file 4764fee60074585614bbf4a0.xlsx]

## Sheet: Interaction proteins of ARF6
				Up-regulated Fold
Number	Gene Name	Protein Name	Score	WT	Q67L	T27N	Function Annotation	Related to Transport
1	TSG101	Tumor susceptibility gene 101 protein	0.624	2.43	2.66	3.11	Component of the ESCRT-I complex, a regulator of vesicular trafficking process.	Yes
2	VAMP2	Vesicle-associated membrane protein 2	0.402	1.5	1.68	1.48	Involved in the targeting and/or fusion of transport vesicles to their target membrane.	Yes
3	RABL6	Rab-like protein 6	0.56	1.48	1.48	1.5	Belongs to the small GTPase superfamily Rab family. May enhance cellular proliferation.	No
4	CDC16	Cell division cycle protein 16 homolog	0.428	1.87	1.53	—	Component of the anaphase promoting complex/cyclosome (APC/C), a cell cycle-regulated E3 ubiquitin ligase.	No
5	RHOC	Rho-related GTP-binding protein RhoC	0.612	1.54	1.74	—	Regulates a signal transduction pathway linking plasma membrane receptors to the assembly of focal adhesions and actin stress fibers.	Yes
6	EXOC6	Exocyst complex component 6	0.962	1.51	—	2.05	Component of the exocyst complex involved in the docking of exocytic vesicles with fusion sites on the plasma membrane.	Yes
7	WASL	Neural Wiskott-Aldrich syndrome protein	0.706	1.58	—	1.65	Regulates actin polymerization by stimulating the actin- nucleating activity of the Arp2/3	Yes
8	OCRL	Inositol polyphosphate 5-phosphatase OCRL-1	0.475	1.42	—	—	May function in lysosomal membrane trafficking by regulating the specific pool of phosphatidylinositol 4,5-bisphosphate that is associated with lysosomes.	Yes
9	GALNT7	N-acetylgalactosaminyltransferase 7	0.447	—	1.59	1.5	Glycopeptide transferase involved in O-linked oligosaccharide biosynthesis.	No
10	SMAP1	Stromal membrane-associated protein 1	0.652	—	1.4	4.13	GTPase activating protein that acts on ARF6. Plays a role in clathrin-dependent endocytosis.	Yes
11	RABEP1	Rab GTPase-binding effector protein 1	0.413	—	4.48	—	Involved in endocytic membrane fusion and membrane trafficking of recycling endosomes.	Yes
12	AP1S1	AP-1 complex subunit sigma-1A	0.438	—	—	1.71	Subunit of clathrin-associated adaptor protein complex 1 that plays a role in protein sorting in the late-Golgi/trans-Golgi network (TGN) and/or endosomes.	Yes
