# Supplementary material for: Trimming nano delivery at the cell side by tuning ARF6 GTPases to the GTP-bound form
Source: Research Square preprint supplement (doi:10.21203/rs.3.rs-1884888/v1), 2022-08-11
Supplement: Supplementary file 3 [file 71a955772d55ff67d7612b30.xlsx]

## Sheet: Table2
LFQ Proteomics identification (Search Result) of total cellular proteins of Hela cells after transfected with ARF6WT plasmids
Protein IDs	Majority protein IDs	Peptide counts (all)	Peptide counts (razor+unique)	Peptide counts (unique)	LFQ intensity WT-1	LFQ intensity WT-2	LFQ intensity WT-3	Protein names	Gene names	Fasta headers	Number of proteins	Peptides	Razor + unique peptides	Unique peptides	Peptides WT-1	Peptides WT-2	Peptides WT-3	Razor + unique peptides WT-1	Razor + unique peptides WT-2	Razor + unique peptides WT-3	Unique peptides WT-1	Unique peptides WT-2	Unique peptides WT-3	Sequence coverage [%]	Unique + razor sequence coverage [%]	Unique sequence coverage [%]	Mol. weight [kDa]	Sequence length	Sequence lengths	Fraction average	Fraction 1	Q-value	Score	Sequence coverage WT-1 [%]	Sequence coverage WT-2 [%]	Sequence coverage WT-3 [%]	Intensity	Intensity WT-1	Intensity WT-2	Intensity WT-3	MS/MS count WT-1	MS/MS count WT-2	MS/MS count WT-3	MS/MS count
A0MZ66;A0MZ66-3;A0MZ66-4;A0MZ66-6;A0MZ66-5;A0MZ66-8;A0MZ66-2;A0MZ66-7	A0MZ66;A0MZ66-3;A0MZ66-4;A0MZ66-6;A0MZ66-5;A0MZ66-8;A0MZ66-2	14;14;13;13;12;11;10;4	14;14;13;13;12;11;10;4	14;14;13;13;12;11;10;4	180810000	141070000	176620000	Shootin-1	KIAA1598	;;;;;;	8	14	14	14	10	9	10	10	9	10	10	9	10	29.6	29.6	29.6	71.639	631	631;649;558;601;571;498;456;219	1	107	0	31.07	19.5	18.4	22.8	147460000	257220000	151060000	203310000	2	3	6	36
A1L0T0;M0R026;E9PJS0;E9PL44;M0QZX5;M0R1B5	A1L0T0;M0R026	11;9;4;3;3;2	11;9;4;3;3;2	11;9;4;3;3;2	199470000	208280000	233460000	Acetolactate synthase-like protein	ILVBL	;	6	11	11	11	7	7	6	7	7	6	7	7	6	30.7	30.7	30.7	67.867	632	632;525;262;166;229;165	1	133	0	38.709	18.7	18.8	15.3	186470000	217530000	198170000	195540000	6	6	4	65
A1X283;G3V144;H0Y507;Q5TCZ1-3;Q5TCZ1	A1X283;G3V144	5;3;1;1;1	5;3;1;1;1	5;3;1;1;1	0	31059000	0	SH3 and PX domain-containing protein 2B	SH3PXD2B	;	5	5	5	5	1	3	2	1	3	2	1	3	2	6.4	6.4	6.4	101.58	911	911;430;1060;1105;1133	1	30	0.0012591	2.7415	1.1	3.4	2	38140000	4265100	29284000	24104000	0	1	0	12
A2A2V1;P04156-2;P04156;X6RKS3	A2A2V1;P04156-2;P04156;X6RKS3	2;2;2;1	2;2;2;1	2;2;2;1	0	33664000	31258000	Major prion protein	PRNP	;;;	4	2	2	2	2	2	2	2	2	2	2	2	2	9.6	9.6	9.6	27.278	249	249;246;253;217	1	24	0	5.3416	9.6	9.6	9.6	39350000	38607000	35850000	30070000	0	1	1	11
A2A3N6;B4DY52	A2A3N6	5;2	3;2	0;0	0	32251000	44737000	Putative PIP5K1A and PSMD4-like protein	PIPSL		2	5	3	0	3	4	4	1	2	2	0	0	0	7.1	4.3	0	95.047	862	862;198	1	17	0	6.5469	4.5	6.1	6.1	0	8388000	32708000	51449000	0	1	1	11
A2ACR1;P28065-2;P28065;A2ACR0;B4DZW2;A2ACQ9	A2ACR1;P28065-2;P28065;A2ACR0	6;6;6;4;2;2	6;6;6;4;2;2	6;6;6;4;2;2	298540000	266860000	223690000	Proteasome subunit beta type;Proteasome subunit beta type-9	PSMB9	;;;	6	6	6	6	4	5	5	4	5	5	4	5	5	41.8	41.8	41.8	20.96	196	196;209;219;131;154;178	1	62	0	24.581	27	35.7	35.7	184120000	321990000	290120000	247700000	4	4	4	37
A2AEA2;P10321;F8W9Z8	A2AEA2;P10321	14;14;3	1;1;0	1;1;0	1117000000	927900000	1742700000	HLA class I histocompatibility antigen, Cw-7 alpha chain	HLA-C	;	3	14	1	1	14	14	12	1	1	1	1	1	1	40.9	4.3	4.3	41.301	372	372;366;131	1	127	0	29.846	40.9	40.9	37.1	2585800000	1606600000	1350300000	1982000000	7	5	6	72
A2IDC6;Q4TT38;Q13084;A2IDC7;Q4TT37	A2IDC6;Q4TT38;Q13084;A2IDC7;Q4TT37	4;4;4;3;3	4;4;4;3;3	4;4;4;3;3	0	37346000	34460000	39S ribosomal protein L28, mitochondrial	MRPL28	;;;;	5	4	4	4	2	3	2	2	3	2	2	3	2	18.3	18.3	18.3	28.506	240	240;256;256;194;218	1	26	0.00315	2.317	9.2	12.9	7.9	13040000	28408000	39484000	22486000	1	0	0	11
A4D1E9;A4D1E9-2;C9J8R7;C9JNI1;C9JEQ8	A4D1E9;A4D1E9-2	5;4;2;2;2	5;4;2;2;2	5;4;2;2;2	43194000	43039000	51872000	GTP-binding protein 10	GTPBP10	;	5	5	5	5	5	5	4	5	5	4	5	5	4	17.3	17.3	17.3	42.932	387	387;308;210;236;242	1	52	0	13.909	17.3	17.3	14.5	34593000	58531000	54914000	56250000	1	1	1	12
A5YKK6;A5YKK6-2;A5YKK6-3;A5YKK6-4;B5MDN3;H3BMZ2;H3BVC9;H3BT18;H3BU44;H3BNB1;H3BR89;H3BMH0	A5YKK6;A5YKK6-2;A5YKK6-3;A5YKK6-4;B5MDN3	30;29;26;17;15;7;2;1;1;1;1;1	30;29;26;17;15;7;2;1;1;1;1;1	30;29;26;17;15;7;2;1;1;1;1;1	289750000	281880000	318290000	CCR4-NOT transcription complex subunit 1	CNOT1	;;;;	12	30	30	30	21	19	18	21	19	18	21	19	18	16.7	16.7	16.7	266.94	2376	2376;2371;2150;1551;1227;439;241;62;96;185;193;277	1	232	0	54.148	10.9	9.3	8.5	305410000	328640000	312540000	320860000	10	10	4	83
A6NDG6;H3BV17	A6NDG6	13;2	13;2	13;2	532300000	497070000	531990000	Phosphoglycolate phosphatase	PGP		2	13	13	13	12	12	13	12	12	13	12	12	13	48.6	48.6	48.6	34.006	321	321;57	1	170	0	112.75	45.5	45.5	48.6	454870000	644660000	539870000	458960000	12	8	8	103
A6NDU8	A6NDU8	5	5	5	102990000	0	0	UPF0600 protein C5orf51	C5orf51		1	5	5	5	2	2	3	2	2	3	2	2	3	26.5	26.5	26.5	33.62	294	294	1	40	0	14.691	14.6	8.2	18	130610000	76848000	42769000	76009000	2	1	2	19
A6NEL0;P05114;A6NL93;F2Z2W6;F2Z2Y5;H7BXJ5	A6NEL0;P05114;A6NL93	4;4;3;1;1;1	4;4;3;1;1;1	4;4;3;1;1;1	93794000	136130000	126100000	Non-histone chromosomal protein HMG-14	HMGN1	;;	6	4	4	4	4	4	2	4	4	2	4	4	2	36.2	36.2	36.2	12.435	116	116;100;90;44;45;48	1	39	0	8.333	36.2	36.2	19.8	121420000	123410000	168080000	100510000	1	4	1	19
A6NEM2;P51610-2;P51610;P51610-4;P51610-3;H7C1C4;Q9Y5Z7	A6NEM2;P51610-2;P51610;P51610-4	17;17;17;17;6;3;1	17;17;17;17;6;3;1	17;17;17;17;6;3;1	269550000	277660000	283240000	Host cell factor 1;HCF N-terminal chain 1;HCF N-terminal chain 2;HCF N-terminal chain 3;HCF N-terminal chain 4;HCF N-terminal chain 5;HCF N-terminal chain 6;HCF C-terminal chain 1;HCF C-terminal chain 2;HCF C-terminal chain 3;HCF C-terminal chain 4;HCF C-terminal chain 5;HCF C-terminal chain 6	HCFC1	;;;	7	17	17	17	11	17	11	11	17	11	11	17	11	12.4	12.4	12.4	213.47	2080	2080;1966;2035;2079;428;611;792	1	161	0	46.034	7.7	12.4	7.3	249700000	272600000	372070000	266010000	4	4	5	62
A6NFX8;Q9UKK9;A6NJU6;A6NCQ0;H0YEY4;C9JYY9	A6NFX8;Q9UKK9;A6NJU6;A6NCQ0	14;14;10;8;5;3	14;14;10;8;5;3	14;14;10;8;5;3	1644100000	1554800000	1513100000	ADP-sugar pyrophosphatase	NUDT5	;;;	6	14	14	14	14	13	14	14	13	14	14	13	14	66.8	66.8	66.8	25.895	232	232;219;186;180;137;97	1	267	0	102.2	66.8	60.8	66.8	1561700000	1672700000	1664000000	1643100000	17	13	15	189
A6NG79;Q92733;H0YE12;H0Y679	A6NG79;Q92733;H0YE12;H0Y679	2;2;1;1	2;2;1;1	2;2;1;1	23253000	0	28327000	Proline-rich protein PRCC	PRCC	;;;	4	2	2	2	2	1	2	2	1	2	2	1	2	7	7	7	48.959	459	459;491;198;257	1	18	0	3.8262	7	4.6	7	19878000	23446000	20188000	30264000	1	1	1	8
A6NGP5;Q9H910;B4DLH4;H3BU16;H3BMV3;Q9H910-2;H3BMT0;H3BTV5;H3BMM8;B4E1P3	A6NGP5;Q9H910;B4DLH4;H3BU16;H3BMV3;Q9H910-2;H3BMT0;H3BTV5	5;5;5;4;4;4;3;3;2;2	5;5;5;4;4;4;3;3;2;2	5;5;5;4;4;4;3;3;2;2	115040000	105460000	108120000	Hematological and neurological expressed 1-like protein	HN1L	;;;;;;;	10	5	5	5	4	5	4	4	5	4	4	5	4	43.3	43.3	43.3	18.906	178	178;190;218;167;190;174;115;116;70;98	1	57	0	16.793	29.8	43.3	35.4	71507000	131110000	125140000	123900000	3	3	3	36
A6NGW1;O95070;E9PIZ0;C9JST7;E9PS11	A6NGW1;O95070;E9PIZ0;C9JST7	4;4;3;3;1	4;4;3;3;1	4;4;3;3;1	118540000	102920000	113430000	Protein YIF1A	YIF1A	;;;	5	4	4	4	3	4	3	3	4	3	3	4	3	24.1	24.1	24.1	26.377	241	241;293;160;199;79	1	49	0	15.697	16.2	24.1	16.2	157700000	130260000	120520000	107240000	2	2	2	22
A6NHR9;A6NHR9-2;J3KTL8;A6NHR9-3;J3KRK8;J3QSH1	A6NHR9;A6NHR9-2;J3KTL8;A6NHR9-3	16;15;12;10;1;1	16;15;12;10;1;1	16;15;12;10;1;1	135050000	129030000	143300000	Structural maintenance of chromosomes flexible hinge domain-containing protein 1	SMCHD1	;;;	6	16	16	16	11	10	9	11	10	9	11	10	9	9.9	9.9	9.9	226.37	2005	2005;1917;1388;762;49;150	1	118	0	25.937	6.4	5.8	4.8	114740000	162420000	145250000	142040000	4	3	3	42
A6NLH6;Q9P003	A6NLH6;Q9P003	1;1	1;1	1;1	116170000	131790000	125020000	Protein cornichon homolog 4	CNIH4	;	2	1	1	1	1	1	1	1	1	1	1	1	1	14.6	14.6	14.6	15.771	137	137;139	1	36	0	24.982	14.6	14.6	14.6	133440000	145560000	134470000	138930000	1	2	1	21
A6NMQ1;P09884	A6NMQ1;P09884	5;5	5;5	5;5	35613000	0	0	DNA polymerase;DNA polymerase alpha catalytic subunit	POLA1	;	2	5	5	5	4	3	2	4	3	2	4	3	2	5.1	5.1	5.1	166.46	1468	1468;1462	1	38	0	14.699	4	2.5	1.4	6638600	41018000	18518000	9190400	1	1	0	12
A6NMQ3;C9JUF4;Q5T5H1;O43768-2;O43768;O43768-9;O43768-3;O43768-4;O43768-6;O43768-5;O43768-7;O43768-8;H3BQ52	A6NMQ3;C9JUF4;Q5T5H1;O43768-2;O43768;O43768-9;O43768-3;O43768-4;O43768-6;O43768-5;O43768-7;O43768-8	7;7;7;7;7;7;7;7;5;5;5;4;1	7;7;7;7;7;7;7;7;5;5;5;4;1	6;6;6;6;6;6;6;6;4;4;4;4;0	342290000	350800000	290180000	Alpha-endosulfine	ENSA	;;;;;;;;;;;	13	7	7	6	7	7	7	7	7	7	6	6	6	52.1	52.1	44.3	15.634	140	140;144;187;117;121;133;137;140;113;117;133;105;71	1	103	0	17.862	52.1	52.1	52.1	369610000	462520000	447340000	506590000	6	4	7	47
A6NNI4;G8JLH6;P21926;F5GXT1	A6NNI4;G8JLH6;P21926	3;3;3;1	3;3;3;1	3;3;3;1	195150000	181480000	179870000	Tetraspanin;CD9 antigen	CD9	;;	4	3	3	3	3	3	3	3	3	3	3	3	3	26.4	26.4	26.4	17.764	159	159;228;228;141	1	52	0	25.556	26.4	26.4	26.4	244660000	210160000	221090000	175850000	3	3	2	36
A6NNK5;Q12888;Q12888-3;Q12888-2;C9JXV0	A6NNK5;Q12888;Q12888-3;Q12888-2;C9JXV0	2;2;2;2;1	2;2;2;2;1	2;2;2;2;1	103490000	0	141000000	Tumor suppressor p53-binding protein 1	TP53BP1	;;;;	5	2	2	2	1	1	2	1	1	2	1	1	2	1.4	1.4	1.4	209.02	1927	1927;1972;1975;1977;1033	1	30	0	3.9121	0.7	0.7	1.4	115290000	96497000	105680000	154870000	1	0	2	9
A6PVN5;Q15257-2;Q15257;Q15257-3;B4DZF8;Q15257-4;Q5T949;Q5T948;A6PVN9;Q68CR8;A6PVN6;B7ZBQ0;A6PVN8;A6PVN7;C9IZ76;B7ZBP9;B7ZBP7;B4DDQ6;H0Y6E5	A6PVN5;Q15257-2;Q15257;Q15257-3;B4DZF8;Q15257-4;Q5T949;Q5T948;A6PVN9;Q68CR8	11;11;11;10;9;9;7;7;7;6;5;4;4;3;3;2;2;2;2	11;11;11;10;9;9;7;7;7;6;5;4;4;3;3;2;2;2;2	11;11;11;10;9;9;7;7;7;6;5;4;4;3;3;2;2;2;2	589140000	590210000	571320000	Serine/threonine-protein phosphatase 2A activator	PPP2R4;DKFZp781M17165	;;;;;;;;;	19	11	11	11	10	8	9	10	8	9	10	8	9	39.5	39.5	39.5	37.375	329	329;323;358;294;374;281;250;253;263;104;176;61;129;64;132;41;77;151;218	1	129	0	59.502	36.5	30.4	33.1	754960000	648510000	579950000	516390000	8	6	6	83
A8MT37;P49840;M0QYV0	A8MT37;P49840;M0QYV0	3;3;2	3;3;2	3;3;2	44205000	0	0	Glycogen synthase kinase-3 alpha	GSK3A	;;	3	3	3	3	3	1	1	3	1	1	3	1	1	10	10	10	44.919	401	401;483;167	1	26	0	6.4973	10	2.2	2.2	17504000	51128000	12098000	13232000	1	0	0	7
A8MT72;Q16799-3;Q16799-2;Q16799	A8MT72;Q16799-3;Q16799-2;Q16799	2;2;2;2	2;2;2;2	2;2;2;2	515640000	584710000	559560000	Reticulon;Reticulon-1	RTN1	;;;	4	2	2	2	2	2	2	2	2	2	2	2	2	8.3	8.3	8.3	21.862	193	193;208;356;776	1	46	0.0029084	2.321	8.3	8.3	8.3	579900000	571860000	595780000	557050000	2	3	3	28
A8MTY9;E7EWN9;B7Z6B1;O14972;A8MY26;B7Z606	A8MTY9;E7EWN9;B7Z6B1;O14972;A8MY26;B7Z606	3;3;3;3;2;2	3;3;3;3;2;2	3;3;3;3;2;2	29158000	26027000	30426000	Down syndrome critical region protein 3	DSCR3	;;;;;	6	3	3	3	2	3	3	2	3	3	2	3	3	17.3	17.3	17.3	27.958	249	249;253;270;297;172;220	1	29	0	4.7126	12.4	17.3	17.3	23760000	29611000	28925000	34499000	1	2	0	12
A8MUM1;Q53HC9;C9JVR6;F8WDX0;F8WB12;F8WDS8;C9J0U9;D3YTH5	A8MUM1;Q53HC9;C9JVR6	4;4;2;1;1;1;1;1	4;4;2;1;1;1;1;1	4;4;2;1;1;1;1;1	47036000	0	0	Protein TSSC1	TSSC1	;;	8	4	4	4	3	1	1	3	1	1	3	1	1	19.6	19.6	19.6	46.319	414	414;387;178;58;87;132;155;314	1	22	0	7.9276	16.4	3.1	3.1	15850000	43541000	17971000	16542000	3	0	0	8
A8MVQ8;O95749;C9J6G3;C9J7M1	A8MVQ8;O95749;C9J6G3;C9J7M1	3;3;2;2	3;3;2;2	3;3;2;2	35871000	35950000	0	Geranylgeranyl pyrophosphate synthase	GGPS1	;;;	4	3	3	3	3	2	1	3	2	1	3	2	1	15.9	15.9	15.9	28.423	246	246;300;230;242	1	28	0	6.4637	15.9	11	4.5	23576000	40349000	31603000	12123000	2	1	0	10
A8MVR0;Q9Y6Y0	A8MVR0;Q9Y6Y0	5;5	5;5	5;5	79756000	57022000	78835000	Influenza virus NS1A-binding protein	IVNS1ABP	;	2	5	5	5	5	3	4	5	3	4	5	3	4	18.4	18.4	18.4	46.759	424	424;642	1	47	0	12.385	18.4	10.1	15.8	57555000	76803000	36904000	91040000	2	2	4	24
A8MW61;O43660;O43660-2;H0YA24;D6RA26;H0YAA2;B7Z982	A8MW61;O43660;O43660-2	9;9;8;4;3;1;1	9;9;8;4;3;1;1	9;9;8;4;3;1;1	127290000	115490000	104630000	Pleiotropic regulator 1	PLRG1	;;	7	9	9	9	6	6	8	6	6	8	6	6	8	29.2	29.2	29.2	57.181	514	514;514;505;156;212;106;131	1	78	0	18.74	17.5	16.9	22.8	140170000	114460000	117450000	125960000	2	4	3	28
A8MWK3;P19022;C9J8J8;P55283-2;P55283	A8MWK3;P19022	10;10;1;1;1	10;10;1;1;1	10;10;1;1;1	269830000	201860000	289380000	Cadherin-2	CDH2	;	5	10	10	10	6	7	6	6	7	6	6	7	6	23.4	23.4	23.4	97.039	875	875;906;191;842;916	1	91	0	48.592	14.9	16.7	15.1	179700000	298430000	321300000	287470000	5	6	4	62
A8MXP9;P43243;D6REM6;D6R991;B3KM87;P43243-2;H0Y8T4;D6R8Z5;D6RAM9;D6RAY2;D6RCM3;D6REK4;D6RBI2;D6RE02;D6RIA2;D6RB45;D6RGW7;D6R9F3;D6RBS2;D6RBK5	A8MXP9;P43243;D6REM6;D6R991	20;20;17;13;9;9;8;3;2;2;2;2;2;2;2;1;1;1;1;1	20;20;17;13;9;9;8;3;2;2;2;2;2;2;2;1;1;1;1;1	20;20;17;13;9;9;8;3;2;2;2;2;2;2;2;1;1;1;1;1	964970000	893170000	1014000000	Matrin-3	MATR3	;;;	20	20	20	20	17	17	18	17	17	18	17	17	18	32.4	32.4	32.4	99.966	895	895;847;794;433;509;559;334;107;81;86;99;100;109;124;172;47;77;78;87;121	1	287	0	67.895	25.1	28.9	29.5	1016600000	1056300000	1104000000	1058600000	11	12	17	148
A8MYQ9;J3KQW8;Q9BZG1-4;Q9BZG1;Q9BZG1-2;C9JBG0;E7ES60;C9JY26;V9GY61;K7EJW7;K7EIF2;H7C0Y7;J3QLC6	A8MYQ9;J3KQW8;Q9BZG1-4;Q9BZG1;Q9BZG1-2;C9JBG0;E7ES60;C9JY26	7;7;7;7;6;5;5;4;3;3;3;3;2	7;7;7;7;6;5;5;4;3;3;3;3;2	7;7;7;7;6;5;5;4;3;3;3;3;2	83187000	103110000	99918000	Ras-related protein Rab-34	RAB34	;;;;;;;	13	7	7	7	7	5	4	7	5	4	7	5	4	30.8	30.8	30.8	29.2	260	260;316;237;259;251;210;268;258;48;51;149;171;156	1	73	0	12.116	30.8	21.5	15.4	113830000	139070000	58492000	83760000	3	3	3	31
A8MZF9;P55039;J3KRL5;J3QR71;J3QRI9;J3QKW7;J3QL90;J3QKV7;J3QLF3	A8MZF9;P55039	7;7;3;3;3;3;2;2;1	7;7;3;3;3;3;2;2;1	7;7;3;3;3;3;2;2;1	95618000	82377000	94695000	Developmentally-regulated GTP-binding protein 2	DRG2	;	9	7	7	7	5	5	6	5	5	6	5	5	6	23.6	23.6	23.6	38.129	343	343;364;113;158;172;244;112;161;90	1	66	0	13.575	14.6	15.2	20.7	127770000	108820000	103470000	131830000	3	2	1	18
A9Z1X7;E9PCT1;Q8IYB3-2;Q8IYB3;M0R088;B4DED5;M0R1E7;M0QXG5	A9Z1X7;E9PCT1;Q8IYB3-2;Q8IYB3;M0R088;B4DED5	4;4;4;4;3;2;1;1	4;4;4;4;3;2;1;1	4;4;4;4;3;2;1;1	147060000	170880000	161640000	Serine/arginine repetitive matrix protein 1	SRRM1	;;;;;	8	4	4	4	4	3	4	4	3	4	4	3	4	8.1	8.1	8.1	103.39	913	913;916;902;904;681;318;79;101	1	55	0	20.969	8.1	4.4	8.1	199190000	139670000	153260000	159050000	4	2	2	33
B0FLL2;O60825;O60825-2;B4DI16;B4DY91;F2Z2I2;Q5W015;Q5VX20;Q16875-3;Q16875-2;Q16875;Q16875-4;H0Y483;Q4VBA9;B7Z5C3;Q66S35;P16118-2;Q5XLC2;Q64EX5;Q16877;P16118	B0FLL2;O60825;O60825-2;B4DI16;B4DY91	7;7;5;4;4;2;2;2;2;2;2;2;1;1;1;1;1;1;1;1;1	7;7;5;4;4;2;2;2;2;2;2;2;1;1;1;1;1;1;1;1;1	7;7;5;4;4;2;2;2;2;2;2;2;1;1;1;1;1;1;1;1;1	0	0	43000000	6-phosphofructo-2-kinase/fructose-2,6-bisphosphatase 2;6-phosphofructo-2-kinase;Fructose-2,6-bisphosphatase	PFKFB2	;;;;	21	7	7	7	3	4	5	3	4	5	3	4	5	16.5	16.5	16.5	54.777	472	472;505;471;264;373;455;513;526;500;514;520;534;143;271;458;462;406;434;435;469;471	1	49	0	4.15	5.7	9.5	10.8	56104000	24420000	40868000	59918000	0	0	1	8
B0QY89;Q9Y262;Q9Y262-2;B0QY90;C9JHP4;C9K0Q7;H7C3A0;H0Y7E6	B0QY89;Q9Y262;Q9Y262-2;B0QY90	21;21;20;16;6;6;4;3	21;21;20;16;6;6;4;3	21;21;20;16;6;6;4;3	1145600000	1251600000	1223400000	Eukaryotic translation initiation factor 3 subunit L	EIF3L	;;;	8	21	21	21	18	17	17	18	17	17	18	17	17	38.2	38.2	38.2	70.901	607	607;564;516;466;150;183;127;109	1	268	0	262.1	33.1	31.6	31.3	1247800000	1220800000	1408200000	1199900000	13	12	14	166
B0QYK0;Q01844-6;Q01844-3;Q01844;Q01844-5;C9JGE3;Q01844-2;H7BY36;Q01844-4	B0QYK0;Q01844-6;Q01844-3;Q01844;Q01844-5;C9JGE3;Q01844-2;H7BY36	6;6;6;6;6;5;5;4;1	6;6;6;6;6;5;5;4;1	6;6;6;6;6;5;5;4;1	460960000	356700000	329780000	RNA-binding protein EWS	EWSR1	;;;;;;;	9	6	6	6	4	6	6	4	6	6	4	6	6	13.6	13.6	13.6	64.929	618	618;600;655;656;661;583;583;308;354	1	99	0	115.2	11.2	13.6	13.6	334850000	461060000	401170000	424550000	6	5	7	61
B1AH87;P30536	B1AH87;P30536	3;3	3;3	3;3	629190000	539980000	570910000	Translocator protein	TSPO	;	2	3	3	3	3	3	3	3	3	3	3	3	3	36.4	36.4	36.4	11.896	107	107;169	1	42	0	7.3964	36.4	36.4	36.4	707890000	701930000	611530000	611830000	3	2	3	30
B1AHD1;P55769	B1AHD1;P55769	4;4	4;4	4;4	190460000	167700000	172800000	NHP2-like protein 1;NHP2-like protein 1, N-terminally processed	NHP2L1	;	2	4	4	4	4	4	3	4	4	3	4	4	3	32.6	32.6	32.6	14.627	132	132;128	1	47	0	62.514	32.6	32.6	23.5	212060000	220820000	194730000	122830000	3	2	1	23
B1AJY5;B1AJY7;O75832;B1AJY6;O75832-2	B1AJY5;B1AJY7;O75832	8;8;8;3;3	8;8;8;3;3	8;8;8;3;3	186840000	196380000	206230000	26S proteasome non-ATPase regulatory subunit 10	PSMD10	;;	5	8	8	8	6	4	7	6	4	7	6	4	7	53.5	53.5	53.5	20.217	185	185;193;226;110;151	1	94	0	27.472	42.7	25.9	47	212420000	198880000	196770000	260590000	3	3	5	48
B1AKD8;Q5TZA2;Q5TZA2-2	B1AKD8;Q5TZA2;Q5TZA2-2	5;5;3	5;5;3	5;5;3	532990000	709550000	665120000	Rootletin	CROCC	;;	3	5	5	5	3	4	3	3	4	3	3	4	3	3.2	3.2	3.2	149.06	1311	1311;2017;1313	1	46	0	6.3587	2	2.5	2	583180000	699930000	798600000	753820000	3	2	1	19
B1AKJ5;O43847;O43847-2;G3V1R5;F5H7V1;H0Y5G9	B1AKJ5;O43847;O43847-2;G3V1R5;F5H7V1	32;32;32;30;20;12	32;32;32;30;20;12	32;32;32;30;20;12	1053300000	1025000000	1052600000	Nardilysin	NRD1	;;;;	6	32	32	32	27	26	22	27	26	22	27	26	22	32.6	32.6	32.6	139.41	1219	1219;1150;1218;1087;747;538	1	369	0	174	27.2	25.6	21.5	907430000	1286400000	1179100000	1003200000	23	19	14	208
B1AKJ6;J3KPA3;Q96SU4-7;Q96SU4-2;Q96SU4;Q96SU4-6;E9PJW9;Q96SU4-5;Q96SU4-4;Q96SU4-3;H0YE19;E9PKX6;H0YCW0;E9PJ80;E9PLH0;E9PNR1	B1AKJ6;J3KPA3;Q96SU4-7;Q96SU4-2;Q96SU4;Q96SU4-6;E9PJW9;Q96SU4-5;Q96SU4-4;Q96SU4-3	8;8;8;8;8;8;7;6;6;6;3;1;1;1;1;1	8;8;8;8;8;8;7;6;6;6;3;1;1;1;1;1	8;8;8;8;8;8;7;6;6;6;3;1;1;1;1;1	156390000	119850000	106080000	Oxysterol-binding protein;Oxysterol-binding protein-related protein 9	OSBPL9	;;;;;;;;;	16	8	8	8	7	7	7	7	7	7	7	7	7	12.1	12.1	12.1	83.785	741	741;754;719;723;736;746;655;558;571;626;196;32;34;41;92;109	1	76	0	18.026	10.9	10.7	10.9	84051000	184300000	139730000	135500000	2	3	3	31
B1AKV3;Q9NVA1-2;Q9NVA1;B7Z314;B1AKV4;B1AKV2;B1AKV6;Q9NVA1-5;Q9NVA1-4;F8WCR2;B7Z1C6;F5H4C5;B7Z7J8;H7BYA2;Q9NVA1-3	B1AKV3;Q9NVA1-2;Q9NVA1;B7Z314;B1AKV4;B1AKV2;B1AKV6;Q9NVA1-5;Q9NVA1-4	3;3;3;2;2;2;2;2;2;1;1;1;1;1;1	3;3;3;2;2;2;2;2;2;1;1;1;1;1;1	3;3;3;2;2;2;2;2;2;1;1;1;1;1;1	31698000	13929000	0	Ubiquinol-cytochrome-c reductase complex assembly factor 1	UQCC1	;;;;;;;;	15	3	3	3	2	3	2	2	3	2	2	3	2	12.4	12.4	12.4	28.939	249	249;273;299;200;219;221;243;231;272;124;144;148;162;187;184	1	31	0	4.8078	7.6	12.4	8.4	17962000	21771000	20201000	18577000	3	0	0	6
B1ALK7;B7Z6G2;Q14155-1;Q14155-5;Q14155-6;Q14155-2;Q14155-3;Q14155;E7EUY6;E9PDQ5;B7Z6D9;E7EU80	B1ALK7;B7Z6G2;Q14155-1;Q14155-5;Q14155-6;Q14155-2;Q14155-3;Q14155;E7EUY6;E9PDQ5	9;9;9;9;8;8;8;8;7;6;2;1	9;9;9;9;8;8;8;8;7;6;2;1	9;9;9;9;8;8;8;8;7;6;2;1	91866000	119070000	106070000	Rho guanine nucleotide exchange factor 7	ARHGEF7	;;;;;;;;;	12	9	9	9	5	4	5	5	4	5	5	4	5	15.7	15.7	15.7	79.831	705	705;721;646;731;625;753;782;803;447;547;181;151	1	63	0	16.556	8.4	6.8	9.1	124980000	91204000	240730000	95488000	1	3	4	27
B1ALM5;Q9P0T7;B1ALM7;B1ALM8;B1ALM4;Q9NQ34-2;Q9NQ34	B1ALM5;Q9P0T7	3;3;1;1;1;1;1	3;3;1;1;1;1;1	3;3;1;1;1;1;1	63805000	68188000	71842000	Transmembrane protein 9	TMEM9	;	7	3	3	3	2	2	3	2	2	3	2	2	3	21	21	21	20.958	186	186;183;138;151;163;124;198	1	28	0	4.6831	10.8	10.8	21	65079000	63780000	63870000	91283000	1	1	0	11
B1AMU3;Q9Y3B2;R4GNH9;R4GMQ7;B1AMU7;B1AMU4	B1AMU3;Q9Y3B2;R4GNH9;R4GMQ7;B1AMU7;B1AMU4	4;4;3;3;3;3	4;4;3;3;3;3	4;4;3;3;3;3	38172000	41564000	43563000	Exosome complex component CSL4	EXOSC1	;;;;;	6	4	4	4	3	3	2	3	3	2	3	3	2	31.2	31.2	31.2	18.816	170	170;195;139;143;165;178	1	45	0	11.451	24.7	22.9	15.9	51691000	34865000	37994000	36383000	2	2	1	23
B1AMW1;P19256-2;P19256-3;P19256;H0YDI1	B1AMW1;P19256-2;P19256-3;P19256	3;3;3;3;1	3;3;3;3;1	3;3;3;3;1	70148000	90271000	100040000	Lymphocyte function-associated antigen 3	CD58	;;;	5	3	3	3	3	3	3	3	3	3	3	3	3	14.6	14.6	14.6	27.018	240	240;237;248;250;131	1	35	0	9.9574	14.6	14.6	14.6	78019000	80513000	95339000	67415000	3	2	2	27
B1ANH0;Q16774-2;B1ANG9;Q16774;Q16774-3;B1ANH5;B1ANH2;B1ANH6;B1ANH3	B1ANH0;Q16774-2;B1ANG9;Q16774;Q16774-3;B1ANH5;B1ANH2;B1ANH6;B1ANH3	8;8;7;7;7;6;6;5;4	8;8;7;7;7;6;6;5;4	8;8;7;7;7;6;6;5;4	322990000	328070000	413180000	Guanylate kinase	GUK1	;;;;;;;;	9	8	8	8	8	8	7	8	8	7	8	8	7	53.9	53.9	53.9	23.711	217	217;218;218;197;241;199;253;242;272	1	113	0	21.786	53.9	53.9	48.8	407250000	415610000	362810000	344230000	8	3	2	52
B1APY4;Q01974	B1APY4;Q01974	7;7	7;7	7;7	0	24424000	0	Tyrosine-protein kinase transmembrane receptor ROR2	ROR2	;	2	7	7	7	3	3	3	3	3	3	3	3	3	13.4	13.4	13.4	79.27	704	704;943	1	37	0	6.413	5.1	8.1	5.1	26700000	52152000	31280000	30442000	0	2	0	6
B1AVQ5;P15941-4;P15941-3;P15941;P15941-2;P15941-7;P15941-17;P15941-11;P15941-8;B1AVQ7;P15941-15;P15941-6;P15941-12;P15941-16;P15941-9;P15941-13;P15941-10;V9GZ38;P15941-5	B1AVQ5;P15941-4;P15941-3;P15941;P15941-2;P15941-7;P15941-17;P15941-11;P15941-8;B1AVQ7;P15941-15;P15941-6	7;7;7;7;7;6;6;6;6;5;4;4;3;3;3;3;3;1;1	7;7;7;7;7;6;6;6;6;5;4;4;3;3;3;3;3;1;1	7;7;7;7;7;6;6;6;6;5;4;4;3;3;3;3;3;1;1	725700000	741070000	751070000	Mucin-1;Mucin-1 subunit alpha;Mucin-1 subunit beta	MUC1	;;;;;;;;;;;	19	7	7	7	7	7	7	7	7	7	7	7	7	20.2	20.2	20.2	49.224	475	475;1243;1252;1255;1264;255;259;264;273;229;224;230;159;166;168;198;203;251;1087	1	135	0	87.764	20.2	20.2	20.2	788590000	874350000	885570000	796420000	7	7	6	80
B2WTI3;B2WTI4;K7EJU9;Q6NYC1-2;Q6NYC1;Q6NYC1-3	B2WTI3;B2WTI4;K7EJU9;Q6NYC1-2;Q6NYC1;Q6NYC1-3	6;6;6;6;6;6	6;6;6;6;6;6	6;6;6;6;6;6	81964000	76217000	96553000	Bifunctional arginine demethylase and lysyl-hydroxylase JMJD6	JMJD6	;;;;;	6	6	6	6	4	3	3	4	3	3	4	3	3	26	26	26	39.241	335	335;361;395;372;403;414	1	56	0	35.167	18.8	15.8	15.8	91463000	95264000	70814000	88042000	4	3	4	43
B3KRB7;O14920-4;O14920-2;O14920;E5RGW5;G3V105	B3KRB7;O14920-4;O14920-2;O14920	3;3;3;3;1;1	3;3;3;3;1;1	3;3;3;3;1;1	45483000	0	35947000	Inhibitor of nuclear factor kappa-B kinase subunit beta	IKBKB	;;;	6	3	3	3	2	1	2	2	1	2	2	1	2	6.2	6.2	6.2	60.819	533	533;697;754;756;375;562	1	23	0.00025582	2.9242	4.1	1.7	4.1	13054000	60503000	7154800	27565000	1	0	1	8
B3KS98;O15372;E5RJT0;E5RGU4;E5RFW7;E5RFH0;E5RHC7;E5RH59	B3KS98;O15372	15;15;7;4;3;3;2;2	15;15;7;4;3;3;2;2	15;15;7;4;3;3;2;2	793690000	818140000	862250000	Eukaryotic translation initiation factor 3 subunit H	EIF3H	;	8	15	15	15	13	15	13	13	15	13	13	15	13	43.7	43.7	43.7	41.581	366	366;352;244;235;97;170;46;56	1	222	0	76.477	35.8	43.7	35.2	840030000	795070000	995250000	785450000	10	8	8	104
B3KSH1;O00303;B4DEW9;H0YDT6;E9PQV8	B3KSH1;O00303;B4DEW9	13;13;11;4;1	13;13;11;4;1	13;13;11;4;1	1419500000	1344100000	1342100000	Eukaryotic translation initiation factor 3 subunit F	EIF3F	;;	5	13	13	13	13	12	12	13	12	12	13	12	12	47.6	47.6	47.6	39.146	372	372;357;208;100;124	1	189	0	123.79	47.6	42.5	42.5	1107100000	1669400000	1178000000	1129900000	10	8	11	125
B3KY94;O14735-3;O14735;H3BUR9	B3KY94;O14735-3;O14735	4;4;4;1	4;4;4;1	4;4;4;1	109510000	121010000	166680000	CDP-diacylglycerol--inositol 3-phosphatidyltransferase	CDIPT	;;	4	4	4	4	3	4	2	3	4	2	3	4	2	19.8	19.8	19.8	25.946	237	237;168;213;157	1	54	0	8.9376	15.6	19.8	10.1	134310000	129150000	126210000	114110000	2	0	1	28
B4DDF4;B4DUT8;Q99439;Q99439-2;H3BVI6;K7ES69;H3BQH0;U3KPS3	B4DDF4;B4DUT8;Q99439;Q99439-2;H3BVI6	13;13;13;10;8;6;4;2	13;13;13;10;8;6;4;2	12;12;12;9;8;5;4;2	896230000	928450000	785210000	Calponin;Calponin-2	CNN2	;;;;	8	13	13	12	11	10	10	11	10	10	11	10	10	59.1	59.1	55.4	32.616	298	298;330;309;270;218;148;154;103	1	164	0	220.56	51.7	46	46	905530000	912310000	827880000	719650000	12	9	6	103
B4DEX5;F6QUN3;H0Y4B0;O43414-3;O43414-2;O43414;F6UGJ8	B4DEX5;F6QUN3;H0Y4B0;O43414-3;O43414-2;O43414;F6UGJ8	2;2;2;2;2;2;1	2;2;2;2;2;2;1	2;2;2;2;2;2;1	69747000	0	56891000	ERI1 exoribonuclease 3	PRNPIP;ERI3	;;;;;;	7	2	2	2	2	1	2	2	1	2	2	1	2	17.5	17.5	17.5	18.185	160	160;176;204;128;222;337;250	1	29	0	8.0075	17.5	11.9	17.5	17424000	77074000	16684000	60936000	3	1	1	16
B4DF47;Q9BUK6-5;Q9BUK6-7;Q9BUK6-3;Q9BUK6-2;Q9BUK6	B4DF47;Q9BUK6-5;Q9BUK6-7;Q9BUK6-3;Q9BUK6-2;Q9BUK6	3;3;3;3;3;3	3;3;3;3;3;3	3;3;3;3;3;3	0	0	25529000	Protein misato homolog 1	MSTO1	;;;;;	6	3	3	3	1	1	2	1	1	2	1	1	2	11.1	11.1	11.1	34.737	315	315;391;524;558;569;570	1	25	0	3.8995	4.4	2.9	6.7	26915000	6739400	5209800	28145000	0	0	1	7
B4DFL2;P48735;B4DSZ6;H0YL11	B4DFL2;P48735;B4DSZ6	10;10;6;4	10;10;6;4	10;10;6;4	86861000	96339000	90428000	Isocitrate dehydrogenase [NADP], mitochondrial	IDH2	;;	4	10	10	10	6	7	6	6	7	6	6	7	6	27.8	27.8	27.8	45.179	400	400;452;322;312	1	85	0	14.262	13.8	20.5	18.2	104610000	66002000	89580000	101760000	3	3	3	31
B4DFQ4;Q8N668	B4DFQ4;Q8N668	2;2	2;2	2;2	36997000	42118000	0	COMM domain-containing protein 1	COMMD1	;	2	2	2	2	2	2	1	2	2	1	2	2	1	22	22	22	17.665	159	159;190	1	25	0	4.6413	22	22	8.8	34698000	39671000	43820000	18492000	2	1	0	12
B4DGL8;O75027;O75027-2;O75027-3;E9PJR8;E9PNQ5	B4DGL8;O75027;O75027-2;O75027-3	5;5;5;4;2;1	5;5;5;4;2;1	5;5;5;4;2;1	54144000	52958000	54382000	ATP-binding cassette sub-family B member 7, mitochondrial	ABCB7	;;;	6	5	5	5	5	3	3	5	3	3	5	3	3	9	9	9	77.12	702	702;752;753;712;188;171	1	42	0	14.894	9	5.6	4.6	67688000	79374000	53534000	55576000	3	3	0	20
B4DGU4;P35222	B4DGU4;P35222	11;11	6;6	6;6	123040000	104920000	101070000	Catenin beta-1	CTNNB1	;	2	11	6	6	11	10	9	6	5	4	6	5	4	17.4	10.3	10.3	84.765	774	774;781	1	91	0	19.219	17.4	15.1	13.7	151860000	161310000	111780000	101850000	6	1	3	32
B4DGX2;P48426;H7BXS3;S4R320;Q5JUT3	B4DGX2;P48426;H7BXS3	4;4;3;1;1	3;3;2;1;1	3;3;2;1;1	33534000	31995000	0	Phosphatidylinositol 5-phosphate 4-kinase type-2 alpha	PIP4K2A	;;	5	4	3	3	4	3	2	3	2	1	3	2	1	16.4	11.5	11.5	39.802	347	347;406;266;142;215	1	28	0.0024631	2.5108	16.4	13.5	9.2	25876000	39834000	25802000	11984000	0	1	1	8
B4DH53;Q66K74;M0R1M7;M0QXQ9;M0QY41;M0QZ50;M0R1J2	B4DH53;Q66K74	13;13;3;2;2;1;1	13;13;3;2;2;1;1	13;13;3;2;2;1;1	208930000	177590000	195720000	Microtubule-associated protein 1S;MAP1S heavy chain;MAP1S light chain	MAP1S	;	7	13	13	13	11	10	9	11	10	9	11	10	9	16.1	16.1	16.1	109.79	1033	1033;1059;120;185;189;93;188	1	127	0	27.474	12.5	10.5	10.5	206710000	213560000	201650000	194360000	5	2	1	27
B4DHE8;Q96DH6-2;Q96DH6;J3KTC1;J3QKT5;B4DM51;Q96DH6-3;H0YHB7;O43347	B4DHE8;Q96DH6-2;Q96DH6;J3KTC1;J3QKT5;B4DM51;Q96DH6-3	6;6;6;5;3;3;3;1;1	6;6;6;5;3;3;3;1;1	6;6;6;5;3;3;3;1;1	135920000	144120000	126400000	RNA-binding protein Musashi homolog 2	MSI2	;;;;;;	9	6	6	6	5	6	6	5	6	6	5	6	6	23.8	23.8	23.8	34.812	324	324;251;328;140;99;267;151;233;362	1	71	0	19.037	20.1	23.8	23.8	131010000	138730000	143720000	142470000	1	1	1	18
B4DJP7;P62318;H3BT13	B4DJP7;P62318;H3BT13	4;4;2	4;4;2	4;4;2	1289900000	1168500000	1142700000	Small nuclear ribonucleoprotein Sm D3	SNRPD3	;;	3	4	4	4	4	4	4	4	4	4	4	4	4	50	50	50	13.291	120	120;126;62	1	116	0	133.17	50	50	50	1323500000	1323800000	1239500000	1287200000	7	8	9	99
B4DJV2;O75390;H0YIC4;F8VPA1;H0YH82;F8VRI6;F8VPF9;F8VR34;F8VTT8;F8W1S4;F8W4S1;F8VRP1;F8VX68;F8W642;F8VZK9;F8VX07;F8VWQ5;F8VU34;F8W0J2	B4DJV2;O75390	18;18;7;5;5;4;4;4;4;4;4;3;3;2;2;2;2;2;1	18;18;7;5;5;4;4;4;4;4;4;3;3;2;2;2;2;2;1	17;17;7;5;5;4;4;3;3;4;3;3;3;2;2;2;1;1;0	2283200000	2479400000	2555300000	Citrate synthase;Citrate synthase, mitochondrial	CS	;	19	18	18	17	16	17	17	16	17	17	15	16	16	52.5	52.5	50.6	50.431	453	453;466;123;144;190;140;140;146;149;157;178;117;120;66;80;114;132;142;75	1	299	0	114.99	43.5	52.1	43.9	2101500000	2643700000	3130100000	2560800000	17	18	11	188
B4DKB2;P42892-3;P42892-2;P42892-4;P42892;E9PJG1;E9PHZ1	B4DKB2;P42892-3;P42892-2;P42892-4;P42892	24;24;24;24;24;2;1	24;24;24;24;24;2;1	24;24;24;24;24;2;1	1448200000	1311800000	1342100000	Endothelin-converting enzyme 1	ECE1	;;;;	7	24	24	24	23	22	20	23	22	20	23	22	20	40.4	40.4	40.4	83.573	738	738;754;758;767;770;77;134	1	386	0	190.56	38.8	38.6	34.8	1209400000	1762200000	1528900000	1326000000	26	20	21	245
B4DKR0;Q13190-3;Q13190-2;Q13190-4;Q13190;H7C3X5;E9PNU4	B4DKR0;Q13190-3;Q13190-2;Q13190-4;Q13190;H7C3X5;E9PNU4	5;5;5;5;5;4;3	5;5;5;5;5;4;3	5;5;5;5;5;4;3	166700000	182380000	196340000	Syntaxin-5	STX5A;STX5	;;;;;;	7	5	5	5	5	4	3	5	4	3	5	4	3	32	32	32	29.233	259	259;267;301;321;355;158;250	1	62	0	52.377	32	28.6	23.9	133660000	142900000	244900000	127280000	2	3	4	42
B4DKY1;P49589-2;P49589;P49589-3;A8MVQ3;C9JLN0;E9PRS8;E9PLP0	B4DKY1;P49589-2;P49589;P49589-3;A8MVQ3	16;16;16;16;14;2;2;2	16;16;16;16;14;2;2;2	16;16;16;16;14;2;2;2	287730000	283680000	317930000	Cysteine--tRNA ligase, cytoplasmic	CARS	;;;;	8	16	16	16	12	13	14	12	13	14	12	13	14	25.3	25.3	25.3	84.277	739	739;726;748;831;738;45;76;128	1	161	0	98.106	19.6	20.4	21.8	309920000	334810000	317570000	378870000	7	9	6	83
B4DLR2;Q12884;Q12884-2;H7C4D9	B4DLR2;Q12884	6;6;2;1	6;6;2;1	6;6;2;1	48407000	47877000	49700000	Prolyl endopeptidase FAP;Antiplasmin-cleaving enzyme FAP, soluble form	FAP	;	4	6	6	6	6	4	3	6	4	3	6	4	3	8.6	8.6	8.6	84.861	735	735;760;239;25	1	49	0	8.0611	8.6	4.9	3.8	33357000	71415000	48873000	37299000	1	1	1	14
B4DMQ3;Q9BW27;J3QL54;J3KT10;B4DPW1;J3QLD4;J3QLH0;J3QLV0;F5H0W7;J3QL91;J3KSH3;J3KRC0	B4DMQ3;Q9BW27;J3QL54;J3KT10;B4DPW1;J3QLD4;J3QLH0	7;7;6;6;5;4;4;3;3;1;1;1	7;7;6;6;5;4;4;3;3;1;1;1	7;7;6;6;5;4;4;3;3;1;1;1	57403000	68852000	71119000	Nuclear pore complex protein Nup85	NUP85	;;;;;;	12	7	7	7	5	5	5	5	5	5	5	5	5	15.1	15.1	15.1	69.799	610	610;656;544;611;462;272;302;191;259;114;120;169	1	52	0	11.964	9.8	10.7	10	27281000	53741000	69603000	80574000	0	2	2	11
B4DNM9;O15228;Q5TBH8	B4DNM9;O15228;Q5TBH8	5;5;4	5;5;4	5;5;4	50841000	0	0	Dihydroxyacetone phosphate acyltransferase	GNPAT	;;	3	5	5	5	5	2	2	5	2	2	5	2	2	14.1	14.1	14.1	69.906	619	619;680;587	1	38	0	4.8405	14.1	5	5	30055000	66021000	32841000	29483000	2	0	0	8
B4DNW0;Q03154;F8WC59;C9JYZ0;C9JMV9;Q03154-2;Q03154-3;Q03154-4	B4DNW0;Q03154;F8WC59;C9JYZ0;C9JMV9;Q03154-2;Q03154-3;Q03154-4	3;3;2;2;2;2;2;2	3;3;2;2;2;2;2;2	3;3;2;2;2;2;2;2	76000000	0	0	Aminoacylase-1	ACY1;ABHD14A-ACY1	;;;;;;;	8	3	3	3	2	0	1	2	0	1	2	0	1	10.4	10.4	10.4	55.994	498	498;408;201;228;509;336;343;373	1	15	0.00026171	3.2599	8.6	0	4	0	121810000	0	125020000	1	0	0	4
B4DQ14;Q9BY44;F8WAE5;B4DF96;Q9BY44-2;H7C5R5;C9IZE1;H7C5Q3;F8WF18;F8WAT3	B4DQ14;Q9BY44;F8WAE5;B4DF96;Q9BY44-2	21;21;20;18;12;9;8;5;1;1	21;21;20;18;12;9;8;5;1;1	21;21;20;18;12;9;8;5;1;1	991640000	1013800000	990000000	Eukaryotic translation initiation factor 2A;Eukaryotic translation initiation factor 2A, N-terminally processed	EIF2A	;;;;	10	21	21	21	18	18	18	18	18	18	18	18	18	48.9	48.9	48.9	62.288	560	560;585;580;524;371;316;236;158;59;75	1	280	0	51.695	44.3	46.1	45.4	981140000	1105100000	1054400000	1105200000	6	10	7	91
B4DQJ8;P52209;F5H7U0;K7EM49;K7EPF6;K7EMN2;K7ELN9	B4DQJ8;P52209;F5H7U0	25;25;24;10;10;8;8	25;25;24;10;10;8;8	25;25;24;10;10;8;8	8811800000	8615400000	9001600000	6-phosphogluconate dehydrogenase, decarboxylating	PGD	;;	7	25	25	25	23	24	23	23	24	23	23	24	23	66	66	66	51.872	470	470;483;461;205;256;160;224	1	478	0	323.31	60	61.1	57.4	7766600000	9793500000	9743000000	8598700000	31	33	30	367
B4DR61;P61619;P61619-3;F8W776;Q8TC24;Q9H9S3-2;Q9H9S3-3;Q9H9S3;H7C1Q9;H7C069;A6NK38;F2Z2C7;A6NIF9;C9JJV4	B4DR61;P61619;P61619-3	9;9;5;4;4;4;4;4;3;3;3;3;3;3	9;9;5;4;4;4;4;4;3;3;3;3;3;3	6;6;5;1;1;1;1;1;0;0;0;0;0;0	1119700000	1088400000	724420000	Protein transport protein Sec61 subunit alpha isoform 1	SEC61A1	;;	14	9	9	6	7	5	6	7	5	6	5	3	4	23.9	23.9	15.4	52.949	482	482;476;357;410;418;437;454;476;94;145;159;162;168;189	1	101	0	100.65	14.5	10.4	12.2	800350000	1219100000	967730000	702480000	4	4	4	49
B4DR80;Q9Y6E0-2;Q9Y6E0;H0Y630;Q5JV99;Q5JV98	B4DR80;Q9Y6E0-2;Q9Y6E0;H0Y630	11;11;10;8;5;4	11;11;10;8;5;4	6;6;5;4;3;2	198960000	209970000	203990000	Serine/threonine-protein kinase 24;Serine/threonine-protein kinase 24 36 kDa subunit;Serine/threonine-protein kinase 24 12 kDa subunit	STK24	;;;	6	11	11	6	8	7	8	8	7	8	4	4	6	34	34	23.3	45.835	412	412;431;443;369;142;209	1	95	0	98.442	24.8	23.1	27.7	189990000	225660000	200330000	200470000	2	1	3	37
B4DRL9;P24386	B4DRL9;P24386	2;2	2;2	2;2	35045000	0	0	Rab proteins geranylgeranyltransferase component A 1	CHM	;	2	2	2	2	2	1	1	2	1	1	2	1	1	5.5	5.5	5.5	57.264	505	505;653	1	19	0	8.2788	5.5	3.8	3.8	13563000	36855000	22351000	19415000	2	0	0	7
B4DSJ8;Q5TCW7;O60942-3;O60942-4;O60942-2;O60942	B4DSJ8;Q5TCW7;O60942-3;O60942-4;O60942-2;O60942	3;3;3;3;3;3	3;3;3;3;3;3	3;3;3;3;3;3	18575000	0	0	mRNA-capping enzyme;Polynucleotide 5-triphosphatase;mRNA guanylyltransferase	RNGTT	;;;;;	6	3	3	3	3	0	1	3	0	1	3	0	1	8.4	8.4	8.4	59.083	514	514;541;457;541;574;597	1	20	0.00026371	3.364	8.4	0	2.3	10395000	25399000	0	7543400	0	0	0	4
B4DT77;P20073-2;P20073	B4DT77;P20073-2;P20073	21;21;21	21;21;21	21;21;21	1572600000	1772900000	1625200000	Annexin;Annexin A7	ANXA7	;;	3	21	21	21	18	18	17	18	18	17	18	18	17	61.6	61.6	61.6	37.805	336	336;466;488	1	288	0	120.67	56.2	54.2	53.9	1970800000	1683300000	1738900000	1573000000	13	13	16	183
B4DTG6;Q8ND56-2;Q8ND56;K7EMZ9;I3L4Q1	B4DTG6;Q8ND56-2;Q8ND56;K7EMZ9	5;5;5;4;1	5;5;5;4;1	5;5;5;4;1	103290000	104590000	108660000	Protein LSM14 homolog A	LSM14A	;;;	5	5	5	5	5	4	5	5	4	5	5	4	5	15.9	15.9	15.9	46.411	422	422;463;463;333;102	1	57	0	11.572	15.9	14	15.9	67375000	108780000	115870000	105560000	2	3	1	14
B4DUX5;P50579;F8VRR3;F8VQZ7;G3XA91;G3V1U3;F8VSC4;F8VZX9;F8VY03	B4DUX5;P50579;F8VRR3;F8VQZ7;G3XA91	12;12;10;10;10;4;2;1;1	12;12;10;10;10;4;2;1;1	12;12;10;10;10;4;2;1;1	411110000	456170000	468360000	Methionine aminopeptidase 2	METAP2	;;;;	9	12	12	12	10	11	9	10	11	9	10	11	9	34.1	34.1	34.1	50.496	455	455;478;442;477;455;328;161;163;178	1	138	0	60.563	26.4	33.2	26.2	497930000	389420000	482730000	608330000	4	7	7	75
B4DVD8;G3V169;P29466-2;P29466;H0YEC7;P29466-4;P29466-3;E9PQW1;Q5FBZ0;Q5EG05-2;Q5EG05	B4DVD8;G3V169;P29466-2;P29466;H0YEC7;P29466-4;P29466-3	3;3;3;3;2;2;2;1;1;1;1	3;3;3;3;2;2;2;1;1;1;1	3;3;3;3;2;2;2;1;1;1;1	28158000	0	0	Caspase;Caspase-1;Caspase-1 subunit p20;Caspase-1 subunit p10	CASP1	;;;;;;	11	3	3	3	2	1	1	2	1	1	2	1	1	15	15	15	33.009	301	301;367;383;404;236;263;311;95;110;97;197	1	18	0	8.6119	10	7	3	8450500	27817000	9275200	8164500	1	0	0	4
B4DVN3;E7ESC7;Q7L5Y9-3;Q7L5Y9-2;Q7L5Y9;D6RDW4;D6REW7;D6RIB6;B4DQT1;Q7L5Y9-5;Q7L5Y9-4;D6RID6;D6RE80;E7ENL1;D6RA86	B4DVN3;E7ESC7;Q7L5Y9-3;Q7L5Y9-2;Q7L5Y9;D6RDW4;D6REW7;D6RIB6;B4DQT1;Q7L5Y9-5;Q7L5Y9-4;D6RID6;D6RE80;E7ENL1	4;4;4;4;4;3;3;3;3;3;3;2;2;2;1	4;4;4;4;4;3;3;3;3;3;3;2;2;2;1	4;4;4;4;4;3;3;3;3;3;3;2;2;2;1	22263000	18607000	0	Macrophage erythroblast attacher	MAEA	;;;;;;;;;;;;;	15	4	4	4	3	2	0	3	2	0	3	2	0	11.1	11.1	11.1	45.073	395	395;434;355;360;396;245;274;328;348;245;328;115;183;317;107	1	26	0.00076007	2.821	8.9	5.3	0	8666000	30042000	14104000	0	1	0	0	5
B4DWW1;P40616;F8VYN9;B4DZG7;F8VP99;F8W1Z8;F8VP63	B4DWW1;P40616;F8VYN9;B4DZG7	6;6;5;4;1;1;1	6;6;5;4;1;1;1	6;6;5;4;1;1;1	304670000	283460000	301610000	ADP-ribosylation factor-like protein 1	ARL1	;;;	7	6	6	6	5	5	5	5	5	5	5	5	5	57.9	57.9	57.9	18.565	164	164;181;194;135;17;52;64	1	87	0	28.541	48.2	48.2	48.2	279410000	318280000	344600000	331350000	9	5	5	65
B4DXX7;O15523;C9J081;C9J8G5;D6RCM4;Q9NQI0-3;Q9NQI0-2;Q9NQI0-4;Q9NQI0;H0Y960	B4DXX7;O15523	25;25;6;5;2;2;2;2;2;1	1;1;1;1;0;0;0;0;0;0	1;1;1;1;0;0;0;0;0;0	8143900	0	0	ATP-dependent RNA helicase DDX3Y	DDX3Y	;	10	25	1	1	25	23	23	1	0	0	1	0	0	47	5.6	5.6	72.931	657	657;660;250;224;518;575;690;704;724;305	1	2	1	-2	47	39.9	39.7	0	8866700	0	0	1	0	0	1
B4DXZ6;P51114;P51114-2;E9PFF5;P51114-3;E7EU85;C9JZE0;C9JY20;C9JAJ4;C9IZ22;C9J5B4;H7C4S4	B4DXZ6;P51114;P51114-2;E9PFF5;P51114-3;E7EU85	15;15;14;12;12;11;4;4;4;2;1;1	15;15;14;12;12;11;4;4;4;2;1;1	13;13;12;10;10;9;4;4;4;2;1;1	320610000	291570000	357870000	Fragile X mental retardation syndrome-related protein 1	FXR1	;;;;;	12	15	15	13	12	11	8	12	11	8	10	9	7	33.6	33.6	30.9	68.326	608	608;621;539;490;536;454;119;123;151;94;75;246	1	135	0	46.846	25.2	25.2	18.4	322490000	424930000	311820000	313080000	7	7	6	60
B4DZI8;P35606;D6RBT6;D6R997;D6RBZ7;D6RCL6;D6RBG7;H0Y938;H0YAC7	B4DZI8;P35606	38;38;6;6;5;5;5;3;2	38;38;6;6;5;5;5;3;2	38;38;6;6;5;5;5;3;2	2163100000	2098600000	2108500000	Coatomer subunit beta	COPB2	;	9	38	38	38	33	29	28	33	29	28	33	29	28	57.7	57.7	57.7	99.045	877	877;906;111;152;77;86;89;177;118	1	472	0	205.26	52	44	44.2	2303700000	2372700000	2046700000	1872200000	25	25	23	286
B4E1D7;Q9NVS9;B4E0V0;B4E152;J3QQV6	B4E1D7;Q9NVS9;B4E0V0;B4E152	6;6;5;5;2	6;6;5;5;2	6;6;5;5;2	92961000	86525000	98160000	Pyridoxine-5-phosphate oxidase	PNPO	;;;	5	6	6	6	5	5	5	5	5	5	5	5	5	35.4	35.4	35.4	27.822	243	243;261;166;218;120	1	70	0	30.081	29.2	26.7	26.7	76848000	127380000	102010000	110360000	4	2	2	35
B4E1G1;Q9BUN8-2;Q9BUN8;E5RGY0	B4E1G1;Q9BUN8-2;Q9BUN8	3;3;3;1	3;3;3;1	3;3;3;1	73874000	77463000	110030000	Derlin-1	DERL1	;;	4	3	3	3	3	3	1	3	3	1	3	3	1	21.9	21.9	21.9	17.033	151	151;231;251;151	1	39	0	15.694	21.9	21.9	5.3	106160000	114590000	97633000	29619000	3	0	1	16
B4E1J0;F5H2F6;Q96AQ6-2;Q96AQ6;Q96AQ6-3;Q5T173	B4E1J0;F5H2F6;Q96AQ6-2;Q96AQ6;Q96AQ6-3	14;14;14;14;10;2	14;14;14;14;10;2	14;14;14;14;10;2	291290000	341900000	315790000	Pre-B-cell leukemia transcription factor-interacting protein 1	PBXIP1	;;;;	6	14	14	14	11	11	12	11	11	12	11	11	12	32.8	32.8	32.8	62.667	558	558;576;702;731;662;315	1	147	0	55.804	27.2	25.6	28	393990000	315780000	391760000	405540000	3	3	6	57
B4E241;P84103	B4E241;P84103	7;7	6;6	6;6	510650000	560150000	397420000	Serine/arginine-rich splicing factor 3	SRSF3	;	2	7	6	6	6	6	5	5	5	4	5	5	4	46.8	46.8	46.8	14.203	124	124;164	1	60	0	11.357	37.1	37.1	37.1	522830000	597200000	620580000	476260000	4	3	2	34
B4E2S7;P13473-2;P13473;P13473-3;B7Z2R9;H0YCG2	B4E2S7;P13473-2;P13473;P13473-3;B7Z2R9;H0YCG2	6;6;5;5;4;3	6;6;5;5;4;3	6;6;5;5;4;3	427810000	429380000	436400000	Lysosome-associated membrane glycoprotein 2	LAMP2	;;;;;	6	6	6	6	6	6	6	6	6	6	6	6	6	14.6	14.6	14.6	39.811	363	363;410;410;411;300;258	1	95	0	38.212	14.6	14.6	14.6	415220000	471220000	475410000	478690000	5	6	6	57
B4E2V5;P27105;P27105-2	B4E2V5;P27105	10;10;3	10;10;3	10;10;3	1051400000	1124900000	1103500000	Erythrocyte band 7 integral membrane protein	STOM	;	3	10	10	10	8	10	9	8	10	9	8	10	9	60.3	60.3	60.3	25.964	237	237;288;123	1	159	0	147.12	50.6	60.3	53.6	1150800000	1214700000	1249000000	1187100000	8	5	6	97
B4E2X3;Q8N6R0-3;Q8N6R0;Q8N6R0-4;Q8N6R0-1;Q8N6R0-2	B4E2X3;Q8N6R0-3;Q8N6R0;Q8N6R0-4;Q8N6R0-1;Q8N6R0-2	6;6;6;5;4;3	6;6;6;5;4;3	6;6;6;5;4;3	48534000	65861000	49032000	Methyltransferase-like protein 13	METTL13	;;;;;	6	6	6	6	5	4	6	5	4	6	5	4	6	11.7	11.7	11.7	78.687	698	698;613;699;642;543;396	1	49	0	20.43	9.9	7	11.7	48048000	72890000	55790000	83039000	0	2	1	9
B5MCF9;O00541-2;O00541;B3KXD6;H7C267	B5MCF9;O00541-2;O00541;B3KXD6	7;7;7;5;1	7;7;7;5;1	7;7;7;5;1	132310000	160290000	123250000	Pescadillo homolog	PES1	;;;	5	7	7	7	5	6	5	5	6	5	5	6	5	13.7	13.7	13.7	66.077	571	571;583;588;449;194	1	62	0	6.4954	9.6	12.4	9.6	68688000	106270000	225640000	198660000	1	3	2	15
B5MCZ3;P05231;B5MC21;B5MC14;B4DNQ5;B4DNV3;C9J5B0	B5MCZ3;P05231;B5MC21;B5MC14;B4DNQ5;B4DNV3;C9J5B0	7;7;6;5;5;4;4	7;7;6;5;5;4;4	7;7;6;5;5;4;4	47431000	72139000	62878000	Interleukin-6	IL6	;;;;;;	7	7	7	7	5	5	4	5	5	4	5	5	4	42.9	42.9	42.9	21.494	189	189;212;136;198;252;122;152	1	55	0	15.28	33.9	29.1	23.8	72158000	97514000	75088000	45491000	2	3	0	16
B5MDU6;Q9H6V9;Q9H6V9-2;C9JHU6;B5MCU4;Q9H6V9-4;Q9H6V9-3;C9JUM0;B5MCE2;B4DRG3	B5MDU6;Q9H6V9;Q9H6V9-2;C9JHU6;B5MCU4;Q9H6V9-4;Q9H6V9-3;C9JUM0	4;4;4;3;3;3;3;2;1;1	4;4;4;3;3;3;3;2;1;1	4;4;4;3;3;3;3;2;1;1	198790000	233410000	371510000	UPF0554 protein C2orf43	LDAH;C2orf43	;;;;;;;	10	4	4	4	3	3	4	3	3	4	3	3	4	18.9	18.9	18.9	42.668	370	370;325;331;130;240;195;277;159;146;166	1	36	0	6.7168	16.8	16.8	18.9	229590000	250820000	206590000	305570000	1	1	2	13
B7WPF4;Q9UPU5	B7WPF4;Q9UPU5	16;16	16;16	16;16	73423000	95500000	98287000	Ubiquitin carboxyl-terminal hydrolase 24	USP24	;	2	16	16	16	10	7	11	10	7	11	10	7	11	8	8	8	277.41	2460	2460;2620	1	108	0	21.834	4.6	3.5	5.7	90406000	83993000	75429000	93750000	6	3	4	43
B7WPG3;D6W592;Q8WVV9-5;Q8WVV9-4;Q8WVV9;H7C464;C9IYN3;Q8WVV9-3;Q8WVV9-2;H7BXH8;C9JJZ7	B7WPG3;D6W592;Q8WVV9-5;Q8WVV9-4;Q8WVV9	9;9;9;9;9;3;3;3;3;2;1	9;9;9;9;9;3;3;3;3;2;1	9;9;9;9;9;3;3;3;3;2;1	156130000	144480000	151610000	Heterogeneous nuclear ribonucleoprotein L-like	HNRNPLL;HNRPLL	;;;;	11	9	9	9	6	5	4	6	5	4	6	5	4	23.4	23.4	23.4	56.45	508	508;542;508;537;542;133;282;275;282;217;149	1	77	0	22.346	15.9	13	9.8	149930000	151700000	130770000	130810000	2	3	2	24
B7Z1C4;P40123;B7Z385;E9PDI2;B7Z214;F8WEW0;F8WDB9	B7Z1C4;P40123;B7Z385;E9PDI2	10;10;8;8;3;2;2	9;9;7;7;2;2;2	9;9;7;7;2;2;2	147190000	171020000	144690000	Adenylyl cyclase-associated protein 2;Adenylyl cyclase-associated protein	CAP2	;;;	7	10	9	9	8	9	9	7	8	8	7	8	8	34.9	32.9	32.9	45.245	413	413;477;365;451;217;104;194	1	80	0	21.159	28.6	30.5	31.2	110760000	171630000	177690000	174590000	1	4	2	24
B7Z2C3;P49593;B5MCT7;A8MX49;C9J2F3;C9JL74	B7Z2C3;P49593;B5MCT7;A8MX49	5;5;4;4;2;1	5;5;4;4;2;1	5;5;4;4;2;1	0	0	39918000	Protein phosphatase 1F	PPM1F	;;;	6	5	5	5	2	2	4	2	2	4	2	2	4	19.1	19.1	19.1	38.518	350	350;454;286;361;89;82	1	34	0	5.8897	8.3	6.6	13.7	28569000	25054000	28200000	50404000	1	0	0	3
B7Z2S5;Q16881-4;Q16881-3;Q16881;B2R5P6;E2QRB9;E9PNQ6;E7ESI6;E7EW10;Q16881-5;Q16881-2;Q16881-6;E9PIR7;Q16881-7;E9PKD3;E9PIZ5;E9PLT3;E9PKI4;E9PQI3;E9PRI8;E9PJU2	B7Z2S5;Q16881-4;Q16881-3;Q16881;B2R5P6;E2QRB9;E9PNQ6;E7ESI6;E7EW10;Q16881-5;Q16881-2;Q16881-6;E9PIR7;Q16881-7	32;32;32;32;30;30;30;30;30;30;30;30;28;25;14;8;6;6;5;2;1	32;32;32;32;30;30;30;30;30;30;30;30;28;25;14;8;6;6;5;2;1	31;31;31;31;29;29;29;29;29;29;29;29;27;24;13;7;5;5;5;2;1	6595600000	6979800000	7219200000	Thioredoxin reductase 1, cytoplasmic	TXNRD1	;;;;;;;;;;;;;	21	32	32	31	29	28	29	29	28	29	28	27	28	67.8	67.8	65.1	60.021	547	547;551;598;649;497;541;568;581;612;499;543;614;482;461;175;139;70;72;53;44;96	1	590	0	323.31	66.4	59	63.3	7307900000	6961800000	7088100000	7097200000	47	36	39	494
B7Z2X9;P09104;F5H0C8;F5H1C3;U3KQP4	B7Z2X9;P09104;F5H0C8	9;9;6;2;1	5;5;3;1;1	5;5;3;1;1	387970000	413820000	309870000	Gamma-enolase;Enolase	ENO2	;;	5	9	5	5	8	5	7	4	2	3	4	2	3	33	16.9	16.9	42.707	391	391;434;315;103;73	1	38	0	17.002	29.7	15.6	25.3	3941400000	80855000	36154000	55491000	2	1	0	16
B7Z358;Q8N5N7	B7Z358;Q8N5N7	4;4	4;4	4;4	78570000	55282000	68932000	39S ribosomal protein L50, mitochondrial	MRPL50	;	2	4	4	4	3	3	3	3	3	3	3	3	3	46.7	46.7	46.7	15.524	135	135;158	1	45	0	24.103	37	37	38.5	58578000	98514000	60243000	50499000	5	0	3	28
B7Z3I9;P13716;P13716-2	B7Z3I9;P13716;P13716-2	3;3;3	3;3;3	3;3;3	0	33735000	0	Delta-aminolevulinic acid dehydratase	ALAD	;;	3	3	3	3	2	3	1	2	3	1	2	3	1	11.5	11.5	11.5	34.52	313	313;330;359	1	19	0.0017522	2.6647	8.3	11.5	4.8	11094000	27677000	35718000	12970000	0	0	0	1
B7Z468;B7Z574;P20810-4;P20810-8;P20810;E9PCH5;P20810-2;E7ES10;E9PDE4;P20810-3;H0Y7F0;E7EQ12;E7EQA0;H0Y944;D6RBR1;D6RGF7;E7EN75;D6RAA8;D6RC54;E7EQK6	B7Z468;B7Z574;P20810-4;P20810-8;P20810;E9PCH5;P20810-2;E7ES10;E9PDE4;P20810-3;H0Y7F0;E7EQ12;E7EQA0	40;33;33;33;33;32;32;30;29;29;26;23;22;11;9;8;7;4;4;3	40;33;33;33;33;32;32;30;29;29;26;23;22;11;9;8;7;4;4;3	1;0;0;0;0;0;0;0;0;0;0;0;0;0;1;1;1;0;0;0	5226700000	5415400000	5552400000	Calpastatin	CAST	;;;;;;;;;;;;	20	40	40	1	38	38	39	38	38	39	1	1	1	61.8	61.8	1.1	80.998	754	754;694;667;686;708;673;695;642;636;590;436;423;431;288;150;149;156;78;91;156	1	716	0	323.31	61.3	60.1	60.6	5120900000	6337300000	5791100000	6280600000	44	37	39	455
B7Z4B8;Q9BUJ2-4;Q9BUJ2-2;Q9BUJ2;M0R3F1;Q9BUJ2-3;M0QYZ0;M0R0K8;M0R203;M0QZV6;M0QYI8;Q9BUJ2-5;M0QYM5	B7Z4B8;Q9BUJ2-4;Q9BUJ2-2;Q9BUJ2;M0R3F1;Q9BUJ2-3;M0QYZ0	27;27;27;27;23;23;16;5;4;4;4;4;1	27;27;27;27;23;23;16;5;4;4;4;4;1	27;27;27;27;23;23;16;5;4;4;4;4;1	1420400000	1306500000	1427400000	Heterogeneous nuclear ribonucleoprotein U-like protein 1	HNRNPUL1	;;;;;;	13	27	27	27	22	22	20	22	22	20	22	22	20	45.1	45.1	45.1	86.121	767	767;756;804;856;641;752;371;158;81;118;172;390;90	1	329	0	104.4	34	40.4	35.6	1718900000	1380300000	1505500000	1503400000	17	16	23	240
B7Z4K6;O00115;K7ENE5	B7Z4K6;O00115;K7ENE5	3;3;2	3;3;2	3;3;2	44351000	42886000	43167000	Deoxyribonuclease-2-alpha	DNASE2	;;	3	3	3	3	3	2	2	3	2	2	3	2	2	10.8	10.8	10.8	33.615	305	305;360;218	1	30	0	6.279	10.8	6.9	6.9	36414000	76223000	34950000	37487000	1	0	1	9
B7Z588;O14763-2;O14763	B7Z588;O14763-2;O14763	2;2;2	2;2;2	2;2;2	0	16209000	0	Tumor necrosis factor receptor superfamily member 10B	TNFRSF10B	;;	3	2	2	2	1	2	2	1	2	2	1	2	2	12.3	12.3	12.3	28.674	260	260;411;440	1	16	0	7.191	6.5	12.3	12.3	0	7638600	18767000	21513000	1	1	0	8
B7Z5N5;Q15796-2;Q15796;K7EJX0;K7ESI8;K7EL92;K7ERC7;H3BVD1;P84022-3;P84022-2;P84022;O15198-2;O15198;H0YMP2;H0YNV1;H0YL71;H0YKE2;H3BP09;H0YAK7;F5GWU7;P84022-4;Q99717;Q15797	B7Z5N5;Q15796-2;Q15796;K7EJX0	5;5;5;4;2;2;2;2;2;2;2;2;2;1;1;1;1;1;1;1;1;1;1	5;5;5;4;2;2;2;2;2;2;2;2;2;1;1;1;1;1;1;1;1;1;1	5;5;5;4;2;2;2;2;2;2;2;2;2;1;1;1;1;1;1;1;1;1;1	111160000	122910000	129110000	Mothers against decapentaplegic homolog;Mothers against decapentaplegic homolog 2	SMAD2	;;;	23	5	5	5	4	4	4	4	4	4	4	4	4	13.5	13.5	13.5	48.669	431	431;437;467;217;108;109;137;213;320;381;425;430;467;63;84;92;112;114;174;464;230;465;465	1	60	0	10.457	10.7	10.7	10.7	145430000	125130000	124880000	142780000	1	3	1	20
B7Z6B8;Q16698;E5RFV2;E5RJG7;E5RJD2;E5RID6;H0YAW3	B7Z6B8;Q16698;E5RFV2	12;12;6;5;3;2;1	12;12;6;5;3;2;1	12;12;6;5;3;2;1	580810000	574870000	500130000	2,4-dienoyl-CoA reductase, mitochondrial	DECR1	;;	7	12	12	12	11	10	10	11	10	10	11	10	10	44.2	44.2	44.2	34.994	326	326;335;205;181;151;95;43	1	132	0	80.485	41.4	32.8	32.8	489990000	694110000	713130000	605240000	10	8	7	93
B7Z6Q6;Q99661;Q5JR91;B7Z7M6;Q99661-2;Q5JR89	B7Z6Q6;Q99661;Q5JR91;B7Z7M6;Q99661-2	4;4;3;3;3;1	4;4;3;3;3;1	4;4;3;3;3;1	49325000	0	0	Kinesin-like protein;Kinesin-like protein KIF2C	KIF2C	;;;;	6	4	4	4	3	2	1	3	2	1	3	2	1	5.7	5.7	5.7	76.982	684	684;725;336;612;671;287	1	32	0	5.1382	4.5	3.4	1.5	23104000	50986000	32172000	15095000	1	0	0	5
B7Z7A3;Q9BZE4;B4DY13;Q5T3R7	B7Z7A3;Q9BZE4;B4DY13;Q5T3R7	8;8;5;4	8;8;5;4	8;8;5;4	60659000	63495000	76993000	Nucleolar GTP-binding protein 1	GTPBP4	;;;	4	8	8	8	7	6	5	7	6	5	7	6	5	15	15	15	68.272	587	587;634;518;140	1	68	0	11.531	13.6	11.9	8.7	52029000	104800000	70889000	59974000	2	2	2	21
B7Z7F3;Q9H6Z4-3;Q9H6Z4-2;Q9H6Z4;F5H4C2;K7EIJ4;K7EJV3;K7ENJ2;K7EID7;K7ENB9;K7EPW1;K7ESQ0;K7EN31	B7Z7F3;Q9H6Z4-3;Q9H6Z4-2;Q9H6Z4;F5H4C2;K7EIJ4	9;9;9;9;8;5;2;1;1;1;1;1;1	9;9;9;9;8;5;2;1;1;1;1;1;1	9;9;9;9;8;5;2;1;1;1;1;1;1	145880000	119760000	108640000	Ran-binding protein 3	RANBP3	;;;;;	13	9	9	9	7	6	6	7	6	6	7	6	6	23.9	23.9	23.9	52.894	494	494;499;562;567;439;155;174;62;73;74;108;122;171	1	79	0	20.661	20	16.2	16.2	124150000	183490000	136230000	125970000	4	2	4	43
B7Z7N2;F5H1E5;B7Z2Y2;Q14746-2;Q14746	B7Z7N2;F5H1E5;B7Z2Y2;Q14746-2;Q14746	2;2;2;2;2	2;2;2;2;2	2;2;2;2;2	0	0	28223000	Conserved oligomeric Golgi complex subunit 2	COG2	;;;;	5	2	2	2	0	0	2	0	0	2	0	0	2	10.1	10.1	10.1	48.1	427	427;622;679;737;738	1	11	0.0069638	1.8901	0	0	10.1	0	0	0	29942000	0	0	0	4
B7Z817;Q15392;F5H0H1;H7C4B7	B7Z817;Q15392;F5H0H1	16;16;10;7	16;16;10;7	16;16;10;7	723510000	719570000	789550000	Delta(24)-sterol reductase	DHCR24	;;	4	16	16	16	15	13	11	15	13	11	15	13	11	35.4	35.4	35.4	54.75	475	475;516;300;154	1	173	0	48.278	35.4	29.7	24	644660000	874330000	709260000	725790000	9	5	4	80
B7Z9I3;O75787;H0Y750;B7Z1I9;B7Z413;H7C3E1;H7C240	B7Z9I3;O75787;H0Y750;B7Z1I9;B7Z413;H7C3E1	6;6;5;5;5;4;2	6;6;5;5;5;4;2	6;6;5;5;5;4;2	100820000	84600000	107700000	Renin receptor	ATP6AP2	;;;;;	7	6	6	6	5	6	4	5	6	4	5	6	4	27.4	27.4	27.4	35.612	318	318;350;243;272;274;259;203	1	56	0	30.1	21.1	27.4	17.3	53015000	128690000	99770000	74136000	4	3	3	35
B7Z9S8;A6NGH2;P05026-2;P05026;V9GYR2	B7Z9S8;A6NGH2;P05026-2;P05026;V9GYR2	8;8;8;8;5	8;8;8;8;5	8;8;8;8;5	362830000	371020000	372440000	Sodium/potassium-transporting ATPase subunit beta-1	ATP1B1	;;;;	5	8	8	8	8	6	7	8	6	7	8	6	7	39.3	39.3	39.3	28.627	247	247;295;301;303;130	1	109	0	32.56	39.3	28.3	38.5	408920000	445520000	370140000	381240000	10	6	7	79
B7ZC38;Q9NR46;Q9NR46-2;B7ZC39;F8WFB9;G5E9J1;H7C1Z6	B7ZC38;Q9NR46;Q9NR46-2;B7ZC39	14;14;14;13;5;1;1	14;14;14;13;5;1;1	13;13;13;12;4;1;1	494300000	465580000	357170000	Endophilin-B2	SH3GLB2	;;;	7	14	14	13	12	11	12	12	11	12	11	10	11	44.2	44.2	42.2	44.361	400	400;395;404;374;127;24;59	1	171	0	84.065	35.2	32.2	35	435050000	532460000	491660000	377140000	7	6	5	70
B7ZKQ9;Q8WTV0-4;Q8WTV0-2;Q8WTV0-3;F5H4X0;B3KW46;B4DZ71;Q8WTV0-5;Q8WTV0;F5H5E8	B7ZKQ9;Q8WTV0-4;Q8WTV0-2;Q8WTV0-3;F5H4X0;B3KW46;B4DZ71;Q8WTV0-5;Q8WTV0	10;10;10;9;8;8;8;8;8;1	10;10;10;9;8;8;8;8;8;1	10;10;10;9;8;8;8;8;8;1	203120000	209480000	225980000	Scavenger receptor class B member 1	SCARB1	;;;;;;;;	10	10	10	10	6	7	8	6	7	8	6	7	8	21.8	21.8	21.8	53.847	481	481;474;509;409;499;512;516;506;552;146	1	100	0	23.679	13.7	15.8	18.1	310860000	172230000	180710000	280060000	3	1	2	35
B7ZLZ2;Q9BZQ6;H0Y498	B7ZLZ2;Q9BZQ6	4;4;1	4;4;1	4;4;1	1617100000	0	0	ER degradation-enhancing alpha-mannosidase-like protein 3	EDEM3	;	3	4	4	4	3	1	3	3	1	3	3	1	3	5.5	5.5	5.5	102	905	905;932;380	1	21	0.00026357	3.3588	4.2	1.3	4.5	16253000	3322600000	12735000	38209000	2	1	0	4
B8ZZD4;Q86VP1-3;Q86VP1-4;Q86VP1-2;Q86VP1;H7C3L5	B8ZZD4;Q86VP1-3;Q86VP1-4;Q86VP1-2;Q86VP1	5;5;5;5;5;1	5;5;5;5;5;1	5;5;5;5;5;1	0	51295000	0	Tax1-binding protein 1	TAX1BP1	;;;;	6	5	5	5	4	4	1	4	4	1	4	4	1	6.4	6.4	6.4	93.609	813	813;563;590;747;789;326	1	34	0	4.3669	5.4	5.4	1.2	34033000	58614000	64034000	14471000	0	1	0	9
B8ZZN6;P63165;B8ZZ67;P63165-2;B8ZZJ0;B9A032	B8ZZN6;P63165;B8ZZ67;P63165-2	5;5;3;3;2;2	5;5;3;3;2;2	5;5;3;3;2;2	330970000	297180000	250850000	Small ubiquitin-related modifier 1	SUMO1	;;;	6	5	5	5	4	4	4	4	4	4	4	4	4	35.6	35.6	35.6	16.645	146	146;101;62;76;58;77	1	57	0	12.901	27.4	24.7	30.8	321910000	228210000	317680000	311450000	3	2	2	22
B8ZZQ6;P06454-2;P06454;B8ZZA1;B8ZZW7;H7C2N1	B8ZZQ6;P06454-2;P06454;B8ZZA1;B8ZZW7;H7C2N1	7;7;7;6;6;6	7;7;7;6;6;6	7;7;7;6;6;6	2428800000	2725500000	2772900000	Prothymosin alpha;Prothymosin alpha, N-terminally processed;Thymosin alpha-1	PTMA	;;;;;	6	7	7	7	7	7	7	7	7	7	7	7	7	37.4	37.4	37.4	11.758	107	107;110;111;131;136;148	1	155	0	133.89	37.4	37.4	37.4	2270600000	2682300000	3093500000	2051000000	14	16	13	157
B8ZZS4;Q9H8Y5	B8ZZS4;Q9H8Y5	5;5	5;5	5;5	33169000	0	0	Ankyrin repeat and zinc finger domain-containing protein 1	ANKZF1	;	2	5	5	5	3	2	2	3	2	2	3	2	2	15.9	15.9	15.9	57.572	516	516;726	1	29	0	19.577	11.8	7.8	7.8	28343000	43527000	28573000	28486000	2	1	0	13
B9ZVX0;E9PHQ0;E7ET75;E9PEZ3;H9KV28;O60610-2;O60610-3;O60610;E7ERW8;E7EMV0;B4E2I7;E5RJ79	B9ZVX0;E9PHQ0;E7ET75;E9PEZ3;H9KV28;O60610-2;O60610-3;O60610;E7ERW8;E7EMV0	40;40;40;40;40;40;40;40;39;22;4;1	40;40;40;40;40;40;40;40;39;22;4;1	40;40;40;40;40;40;40;40;39;22;4;1	1179700000	1188900000	1123800000	Protein diaphanous homolog 1	DIAPH1	;;;;;;;;;	12	40	40	40	36	27	27	36	27	27	36	27	27	39.7	39.7	39.7	138.93	1248	1248;1260;1264;1269;1273;1248;1263;1272;1215;863;201;112	1	475	0	230.67	35.9	24.2	26.6	1197100000	1372900000	1229200000	1090200000	26	15	16	232
C9J0G0;Q99424;H7C4Q2;C9JY29	C9J0G0;Q99424;H7C4Q2;C9JY29	2;2;1;1	2;2;1;1	2;2;1;1	0	0	69915000	Acyl-coenzyme A oxidase;Peroxisomal acyl-coenzyme A oxidase 2	ACOX2	;;;	4	2	2	2	2	2	2	2	2	2	2	2	2	3.3	3.3	3.3	75.141	667	667;681;93;171	1	26	0.0084862	1.7552	3.3	3.3	3.3	61559000	80395000	83374000	78021000	0	0	1	3
C9J0I9;Q86WB0-3;Q86WB0-2;Q86WB0	C9J0I9;Q86WB0-3;Q86WB0-2;Q86WB0	5;5;5;5	5;5;5;5	5;5;5;5	34124000	38047000	36485000	Nuclear-interacting partner of ALK	ZC3HC1	;;;	4	5	5	5	4	4	3	4	4	3	4	4	3	13.7	13.7	13.7	50.562	459	459;431;481;502	1	46	0	6.791	10.2	10.5	7	55036000	33427000	51259000	50289000	2	2	2	18
C9J0K6;P30626-3;P30626-2;P30626;B4DHQ6	C9J0K6;P30626-3;P30626-2;P30626;B4DHQ6	8;8;8;8;4	8;8;8;8;4	8;8;8;8;4	372910000	392180000	326860000	Sorcin	SRI	;;;;	5	8	8	8	7	6	6	7	6	6	7	6	6	51	51	51	17.605	155	155;180;183;198;158	1	90	0	22.899	43.9	36.8	36.8	402910000	470970000	498490000	294240000	4	4	3	44
C9J173;B8ZZF6;E7ET59;E7EUX4;E7ENF2;P49441;C9J128;C9J2Z6	C9J173;B8ZZF6;E7ET59;E7EUX4;E7ENF2;P49441;C9J128;C9J2Z6	2;2;2;2;2;2;1;1	2;2;2;2;2;2;1;1	2;2;2;2;2;2;1;1	34452000	0	0	Inositol polyphosphate 1-phosphatase	INPP1	;;;;;;;	8	2	2	2	2	1	1	2	1	1	2	1	1	20.3	20.3	20.3	16.132	143	143;155;190;212;213;399;68;88	1	16	0	8.073	20.3	8.4	8.4	30401000	38144000	29867000	37079000	1	1	0	8
C9J2G3;C9JQQ2;Q9NWU1-2;Q9NWU1;F8VNS3	C9J2G3;C9JQQ2;Q9NWU1-2;Q9NWU1;F8VNS3	2;2;2;2;1	2;2;2;2;1	2;2;2;2;1	31219000	30100000	0	3-oxoacyl-[acyl-carrier-protein] synthase, mitochondrial	OXSM	;;;;	5	2	2	2	2	2	2	2	2	2	2	2	2	16.8	16.8	16.8	23.632	220	220;231;376;459;102	1	21	0	6.2101	16.8	16.8	16.8	13213000	33757000	41315000	14683000	2	1	2	14
C9J2U4;Q96BW9-2;Q96BW9;B4E101;H7C1A2;G3V0F3	C9J2U4;Q96BW9-2;Q96BW9;B4E101	4;3;3;2;1;1	4;3;3;2;1;1	4;3;3;2;1;1	28118000	0	0	Phosphatidate cytidylyltransferase, mitochondrial	TAMM41	;;;	6	4	4	4	3	1	1	3	1	1	3	1	1	19	19	19	38.078	337	337;316;452;151;55;107	1	15	0	13.128	16.6	4.7	4.7	13477000	29076000	14848000	10025000	1	0	1	5
C9J4M6;C9J2Y9;P30876	C9J4M6;C9J2Y9;P30876	8;8;8	8;8;8	8;8;8	63559000	62568000	60793000	DNA-directed RNA polymerase;DNA-directed RNA polymerase II subunit RPB2	POLR2B	;;	3	8	8	8	7	5	6	7	5	6	7	5	6	8.7	8.7	8.7	125.19	1099	1099;1167;1174	1	61	0	13.996	8	5.9	6.6	68858000	109390000	58582000	76418000	2	2	1	17
C9J4Z3;P61513;M0R0A1;Q6P4E4;E9PEL3;M0R2L6;G5E9R3;A6NKH3	C9J4Z3;P61513;M0R0A1;Q6P4E4;E9PEL3;M0R2L6;G5E9R3	5;5;4;4;4;4;3;1	5;5;4;4;4;4;3;1	5;5;4;4;4;4;3;1	985830000	1062900000	1053700000	60S ribosomal protein L37a	RPL37A	;;;;;;	8	5	5	5	5	5	5	5	5	5	5	5	5	69.1	69.1	69.1	7.624	68	68;92;60;72;75;88;58;93	1	102	0	96.421	69.1	69.1	69.1	957020000	1157600000	945090000	945950000	9	6	7	71
C9J5N1;Q9BTE6;Q9BTE6-2;Q9BTE6-3;K7EQ85;L7N2F4	C9J5N1;Q9BTE6;Q9BTE6-2;Q9BTE6-3;K7EQ85	4;4;4;4;3;1	4;4;4;4;3;1	4;4;4;4;3;1	30329000	24406000	22462000	Alanyl-tRNA editing protein Aarsd1	PTGES3L-AARSD1;AARSD1	;;;;	6	4	4	4	4	2	2	4	2	2	4	2	2	10.1	10.1	10.1	55.065	495	495;412;525;586;94;140	1	32	0	5.2951	10.1	3.4	3.4	31576000	36796000	20192000	17216000	3	1	2	18
C9J6N5;C9JQ40;C9JW51;Q9H098;C9J3Q3;Q9H098-2;X6RET8;C9JP05;C9JYP1;C9J6Y8;F8WCJ2	C9J6N5;C9JQ40;C9JW51;Q9H098;C9J3Q3;Q9H098-2;X6RET8;C9JP05	5;5;5;5;4;4;3;3;2;2;1	5;5;5;5;4;4;3;3;2;2;1	5;5;5;5;4;4;3;3;2;2;1	101380000	62084000	89505000	Protein FAM107B	FAM107B	;;;;;;;	11	5	5	5	2	3	2	2	3	2	2	3	2	49.2	49.2	49.2	14.844	124	124;126;128;131;101;306;90;93;67;84;51	1	45	0	8.8687	24.2	34.7	24.2	65252000	64328000	54642000	45276000	2	0	1	15
C9J712;P35080;C9JQ45;C9J2N0	C9J712;P35080;C9JQ45;C9J2N0	5;5;3;3	5;5;3;3	2;2;0;1	227980000	250190000	270990000	Profilin-2;Profilin	PFN2	;;;	4	5	5	2	4	3	4	4	3	4	2	2	2	64.8	64.8	19.8	9.7982	91	91;140;110;125	1	70	0	30.629	50.5	35.2	49.5	331860000	254970000	109650000	153420000	5	1	4	42
C9J7K9;O15162-2;O15162;H7C5I5;C9J9P4;C9J0H3;C9JE06	C9J7K9;O15162-2;O15162;H7C5I5;C9J9P4	5;5;5;4;3;2;2	5;5;5;4;3;2;2	5;5;5;4;3;2;2	343670000	456150000	302880000	Phospholipid scramblase 1	PLSCR1	;;;;	7	5	5	5	4	4	5	4	4	5	4	4	5	18.3	18.3	18.3	34.217	311	311;237;318;171;248;171;249	1	65	0	24.66	15.1	15.1	18.3	429710000	442970000	406510000	313960000	4	1	2	22
C9J8Q1;F8W9P7;H7C537;Q9UMS0-2;Q9UMS0-3;Q9UMS0	C9J8Q1;F8W9P7;H7C537;Q9UMS0-2;Q9UMS0-3;Q9UMS0	1;1;1;1;1;1	1;1;1;1;1;1	1;1;1;1;1;1	43022000	40905000	54574000	NFU1 iron-sulfur cluster scaffold homolog, mitochondrial	NFU1	;;;;;	6	1	1	1	1	1	1	1	1	1	1	1	1	15.6	15.6	15.6	10.443	96	96;99;126;113;230;254	1	24	0.00050826	2.8694	15.6	15.6	15.6	35390000	45636000	44964000	55519000	2	2	2	20
C9J8T0;P57772	C9J8T0;P57772	4;4	4;4	4;4	51812000	0	35588000	Selenocysteine-specific elongation factor	EEFSEC	;	2	4	4	4	3	2	4	3	2	4	3	2	4	11	11	11	47.876	436	436;596	1	42	0	5.7994	8	6.2	11	36777000	33708000	58303000	41836000	2	1	1	14
C9J8T6;Q14061;H7C4E5	C9J8T6;Q14061;H7C4E5	2;2;1	2;2;1	2;2;1	42959000	43189000	43033000	Cytochrome c oxidase copper chaperone	COX17	;;	3	2	2	2	2	2	2	2	2	2	2	2	2	29.6	29.6	29.6	10.853	98	98;63;58	1	22	0	10.935	29.6	29.6	29.6	47136000	47162000	44280000	42156000	1	1	1	9
C9J9K3;P08865;A6NE09;C9JQR9	C9J9K3;P08865;A6NE09	15;15;13;4	15;15;13;4	15;15;13;4	7981300000	7925400000	9008800000	40S ribosomal protein SA	RPSA;RPSAP58	;;	4	15	15	15	15	15	15	15	15	15	15	15	15	70	70	70	29.404	263	263;295;295;73	1	366	0	323.31	70	70	70	8310900000	8273600000	8773200000	9773000000	27	18	22	278
C9JA08;Q96D46;C9J0B9;C9IZW9;C9K0C2;C9IY70	C9JA08;Q96D46	10;10;3;2;2;1	10;10;3;2;2;1	10;10;3;2;2;1	130770000	162980000	202710000	60S ribosomal export protein NMD3	NMD3	;	6	10	10	10	7	6	8	7	6	8	7	6	8	31.4	31.4	31.4	60.125	529	529;503;218;155;162;98	1	89	0	23.179	23.3	17.8	27.2	116120000	117050000	188830000	220210000	4	4	2	46
C9JA28;Q9UNL2;B4E2P2;C9J365	C9JA28;Q9UNL2;B4E2P2;C9J365	2;2;2;1	2;2;2;1	2;2;2;1	443090000	384350000	505980000	Translocon-associated protein subunit gamma	SSR3	;;;	4	2	2	2	2	2	2	2	2	2	2	2	2	12.6	12.6	12.6	20.161	174	174;185;198;133	1	35	0	22.868	12.6	12.6	12.6	481720000	573140000	591260000	600870000	2	1	2	25
C9JAB2;Q16629-3;Q16629-2;Q16629-4;Q16629;F8WEA1	C9JAB2;Q16629-3;Q16629-2;Q16629-4;Q16629	8;8;8;8;8;3	8;8;8;8;8;3	7;7;7;7;7;3	1159700000	1187200000	1304100000	Serine/arginine-rich splicing factor 7	SRSF7	;;;;	6	8	8	7	7	8	7	7	8	7	6	7	6	31.9	31.9	31.9	26.928	235	235;132;135;226;238;51	1	136	0	33.443	28.1	31.9	28.1	1169300000	1224100000	1257600000	1271400000	5	8	7	91
C9JAG1;Q9C0D9	C9JAG1;Q9C0D9	2;2	2;2	2;2	43915000	0	0	Ethanolaminephosphotransferase 1	EPT1	;	2	2	2	2	2	0	0	2	0	0	2	0	0	21.7	21.7	21.7	20.557	180	180;397	1	15	0	14.786	21.7	0	0	27328000	46806000	0	0	2	0	0	9
C9JAW5;C9JNU6;Q9Y241;A8MV81;Q9Y241-2	C9JAW5;C9JNU6;Q9Y241;A8MV81;Q9Y241-2	2;2;2;1;1	2;2;2;1;1	2;2;2;1;1	63573000	41586000	0	HIG1 domain family member 1A, mitochondrial;HIG1 domain family member 1C	HIGD1A;HIGD1C	;;;;	5	2	2	2	2	2	1	2	2	1	2	2	1	32.5	32.5	32.5	8.8131	83	83;96;93;97;107	1	20	0	28.755	32.5	32.5	21.7	46073000	68402000	43453000	22530000	2	1	1	21
C9JB30;Q9UPY8-2;Q9UPY8	C9JB30;Q9UPY8-2;Q9UPY8	4;4;4	2;2;2	2;2;2	35941000	0	0	Microtubule-associated protein RP/EB family member 3	MAPRE3	;;	3	4	2	2	4	3	2	2	1	0	2	1	0	23.9	15.1	15.1	24.582	218	218;266;281	1	8	0.00026504	3.4239	23.9	16.1	8.7	5643400	41182000	9026100	0	1	0	0	2
C9JC60;G5E977;Q6XQN6;Q6XQN6-2;C9J8U2;Q6XQN6-3;H0YF31;H0YDA6	C9JC60;G5E977;Q6XQN6;Q6XQN6-2;C9J8U2;Q6XQN6-3	12;12;12;12;10;10;3;1	12;12;12;12;10;10;3;1	12;12;12;12;10;10;3;1	239960000	271600000	238460000	Nicotinate phosphoribosyltransferase	NAPRT	;;;;;	8	12	12	12	9	10	7	9	10	7	9	10	7	36.6	36.6	36.6	60.234	566	566;584;538;567;490;525;163;128	1	114	0	51.968	26.3	32.7	19.3	161350000	271340000	279650000	204090000	5	3	4	48
C9JCC6;Q14919;Q14919-2;E9PQX9;E9PNC7;E9PMW2	C9JCC6;Q14919;Q14919-2;E9PQX9	5;5;5;4;2;1	5;5;5;4;2;1	5;5;5;4;2;1	222620000	194690000	204110000	Dr1-associated corepressor	DRAP1	;;;	6	5	5	5	4	4	3	4	4	3	4	4	3	24.5	24.5	24.5	23.205	212	212;205;211;185;155;161	1	50	0	9.0943	24.1	24.1	19.3	217460000	250140000	207800000	124870000	3	3	3	36
C9JCN8;P15408-3;P15408;P15408-2	C9JCN8;P15408-3;P15408;P15408-2	3;3;3;2	3;3;3;2	3;3;3;2	0	0	47009000	Fos-related antigen 2	FOSL2	;;;	4	3	3	3	2	1	2	2	1	2	2	1	2	25.2	25.2	25.2	22.254	202	202;287;326;318	1	21	0	7.4606	14.9	8.9	19.3	32368000	38859000	15367000	38522000	2	0	2	8
C9JDG0;Q9NSV4-7;Q9NSV4-6;Q9NSV4-5;Q9NSV4-4;Q9NSV4;Q9NSV4-2;Q9NSV4-1	C9JDG0;Q9NSV4-7;Q9NSV4-6;Q9NSV4-5;Q9NSV4-4;Q9NSV4;Q9NSV4-2;Q9NSV4-1	7;7;7;7;7;7;4;4	7;7;7;7;7;7;4;4	7;7;7;7;7;7;4;4	74638000	72747000	64459000	Protein diaphanous homolog 3	DIAPH3	;;;;;;;	8	7	7	7	4	4	3	4	4	3	4	4	3	7.2	7.2	7.2	136.88	1193	1193;1112;1123;1147;1182;1193;691;849	1	64	0	13.256	4.4	3.4	2.6	92463000	56821000	61499000	41989000	1	1	1	22
C9JEU5;C9JC84;P02679-2;P02679;C9JPQ9;C9JU00	C9JEU5;C9JC84;P02679-2;P02679;C9JPQ9;C9JU00	2;2;2;2;1;1	2;2;2;2;1;1	2;2;2;2;1;1	20828000	0	0	Fibrinogen gamma chain	FGG	;;;;;	6	2	2	2	2	0	0	2	0	0	2	0	0	7.2	7.2	7.2	50.322	445	445;461;437;453;119;123	1	6	0.00026392	3.3724	7.2	0	0	5358600	22677000	0	0	2	0	0	2
C9JFE4;Q13098-5;Q13098;Q13098-7;Q13098-6;J3KSA5;J3QLT0;J3KRJ4;J3QS88;J3KTB0;J3QQX0;J3QS84;J3QLE8;J3QL53;J3KRE8	C9JFE4;Q13098-5;Q13098;Q13098-7;Q13098-6	16;16;16;16;11;7;5;5;4;4;3;3;3;3;3	16;16;16;16;11;7;5;5;4;4;3;3;3;3;3	16;16;16;16;11;7;5;5;4;4;3;3;3;3;3	544360000	460950000	567630000	COP9 signalosome complex subunit 1	GPS1	;;;;	15	16	16	16	15	10	12	15	10	12	15	10	12	48.2	48.2	48.2	53.371	471	471;487;491;527;549;210;168;253;134;139;79;101;166;168;186	1	190	0	88.385	42.3	33.3	36.1	514470000	644060000	425350000	583780000	8	4	7	80
C9JFV4;Q8IZL8;I3L3A8;F8WDZ1;I3L4M7;I3L445;E7EV54;I3L1P4	C9JFV4;Q8IZL8;I3L3A8;F8WDZ1	10;10;9;8;4;4;4;3	10;10;9;8;4;4;4;3	10;10;9;8;4;4;4;3	85305000	69063000	83598000	Proline-, glutamic acid- and leucine-rich protein 1	PELP1	;;;	8	10	10	10	8	7	5	8	7	5	8	7	5	14.8	14.8	14.8	135.51	1274	1274;1130;1180;1040;151;301;906;148	1	89	0	29.432	11.7	10.4	8.3	44177000	113560000	84951000	97697000	5	2	1	37
C9JG87;Q9NYK5;Q9NYK5-2	C9JG87;Q9NYK5;Q9NYK5-2	5;5;5	5;5;5	5;5;5	73606000	74394000	92884000	39S ribosomal protein L39, mitochondrial	MRPL39	;;	3	5	5	5	4	3	3	4	3	3	4	3	3	20.5	20.5	20.5	34.032	297	297;338;353	1	45	0	12.329	17.8	13.8	13.8	73040000	81051000	70470000	86911000	2	1	0	19
C9JG97;C9JEH3;Q13685;C9JTS3;H7C0R2	C9JG97;C9JEH3;Q13685;C9JTS3	6;6;6;4;2	6;6;6;4;2	6;6;6;4;2	103620000	74846000	118210000	Angio-associated migratory cell protein	AAMP	;;;	5	6	6	6	4	5	4	4	5	4	4	5	4	21.2	21.2	21.2	44.693	415	415;435;434;200;189	1	59	0	10.957	12	18.1	12	85974000	96215000	85743000	109060000	3	1	1	18
C9JIF9;P13798;H7C393;H7C1U0;C9JLK2;F8WEH5	C9JIF9;P13798	18;18;8;7;4;2	18;18;8;7;4;2	18;18;8;7;4;2	554950000	576350000	608350000	Acylamino-acid-releasing enzyme	APEH	;	6	18	18	18	16	14	14	16	14	14	16	14	14	37.2	37.2	37.2	81.673	737	737;732;284;308;232;50	1	195	0	78.863	33	30.4	25.4	579080000	480470000	669210000	560830000	10	7	8	108
C9JIZ6;B1AVU8;P07602;P07602-2;P07602-3	C9JIZ6;B1AVU8;P07602;P07602-2;P07602-3	17;17;17;17;17	17;17;17;17;17	17;17;17;17;17	1196200000	1336100000	1150400000	Prosaposin;Saposin-A;Saposin-B-Val;Saposin-B;Saposin-C;Saposin-D	PSAP	;;;;	5	17	17	17	13	12	15	13	12	15	13	12	15	33.3	33.3	33.3	58.353	526	526;559;524;526;527	1	191	0	26.242	21.9	22.6	26.4	1258100000	1207600000	1407200000	1170400000	8	8	8	91
C9JJ19;P82930	C9JJ19;P82930	9;9	9;9	9;9	123960000	137820000	152700000	28S ribosomal protein S34, mitochondrial	MRPS34	;	2	9	9	9	6	6	5	6	6	5	6	6	5	48.9	48.9	48.9	26.332	225	225;218	1	70	0	9.338	33.3	31.6	21.8	141250000	117350000	149150000	135840000	4	3	3	37
C9JLU1;P52434;P52434-3;P52434-4;P52434-2;P52434-5	C9JLU1;P52434;P52434-3;P52434-4;P52434-2	4;4;3;3;2;1	4;4;3;3;2;1	4;4;3;3;2;1	77635000	66835000	78224000	DNA-directed RNA polymerases I, II, and III subunit RPABC3	POLR2H	;;;;	6	4	4	4	2	2	2	2	2	2	2	2	2	35.1	35.1	35.1	16.925	148	148;150;114;175;122;86	1	31	0	7.6133	19.6	19.6	19.6	74404000	75048000	65544000	72184000	0	1	1	16
C9JME2;Q9Y4F1;Q9Y4F1-2;M0QYB0;H0Y783;M0QXT1;M0R262;Q9Y4F1-3	C9JME2;Q9Y4F1;Q9Y4F1-2	8;8;8;3;2;2;1;1	8;8;8;3;2;2;1;1	8;8;8;3;2;2;1;1	35706000	31609000	0	FERM, RhoGEF and pleckstrin domain-containing protein 1	FARP1	;;	8	8	8	8	4	3	4	4	3	4	4	3	4	10.9	10.9	10.9	122.09	1076	1076;1045;1076;203;215;248;171;129	1	45	0	9.9514	6	3.6	4.7	59294000	40245000	17972000	47853000	1	1	0	13
C9JNK6;O75431-2;O75431;C9JAZ1	C9JNK6;O75431-2;O75431;C9JAZ1	3;3;3;2	3;3;3;2	3;3;3;2	76171000	103990000	125970000	Metaxin-2	MTX2	;;;	4	3	3	3	2	3	3	2	3	3	2	3	3	21.7	21.7	21.7	23.643	207	207;253;263;229	1	51	0	16.05	16.9	21.7	21.7	137870000	78047000	119670000	132930000	3	2	2	35
C9JNW5;P83731;C9JXB8	C9JNW5;P83731;C9JXB8	10;10;9	10;10;9	10;10;9	2577800000	2513300000	2434400000	60S ribosomal protein L24	RPL24	;;	3	10	10	10	8	8	9	8	8	9	8	8	9	52.7	52.7	52.7	17.542	150	150;157;121	1	170	0	31.782	46	41.3	48	2395400000	3205400000	2383400000	2320300000	6	8	8	87
C9JP00;Q9NR56;Q9NR56-3;Q9NR56-4;Q9NR56-7;Q9NR56-6;Q9NR56-2;Q9NR56-5;H7C4T5;O95205;Q86VM6;Q5VZF2-3;Q5VZF2-2;Q5VZF2;C9JCX1;B4E3F7;H7C4Y1	C9JP00;Q9NR56;Q9NR56-3;Q9NR56-4;Q9NR56-7;Q9NR56-6;Q9NR56-2;Q9NR56-5;H7C4T5;O95205;Q86VM6;Q5VZF2-3;Q5VZF2-2;Q5VZF2	6;6;5;5;5;5;5;5;4;3;3;3;3;3;2;2;2	6;6;5;5;5;5;5;5;4;3;3;3;3;3;2;2;2	6;6;5;5;5;5;5;5;4;3;3;3;3;3;2;2;2	158710000	106260000	137710000	Muscleblind-like protein 1;Muscleblind-like protein 2	MBNL1;MBLL;MBNL2	;;;;;;;;;;;;;	17	6	6	6	5	3	3	5	3	3	5	3	3	23.6	23.6	23.6	37.898	348	348;388;302;314;340;342;370;382;329;255;343;361;367;373;155;206;210	1	58	0	10.214	21.3	11.5	11.5	160640000	225460000	124460000	119180000	3	2	2	23
C9JQ41;H7C525;Q4VC31	C9JQ41;H7C525;Q4VC31	3;3;3	3;3;3	3;3;3	50676000	55768000	49102000	Coiled-coil domain-containing protein 58	CCDC58	;;	3	3	3	3	3	3	3	3	3	3	3	3	3	21.5	21.5	21.5	15.296	130	130;141;144	1	27	0.00027012	3.6801	21.5	21.5	21.5	58987000	63247000	73393000	52737000	1	2	1	11
C9JQV0;Q9BRJ6;H7C0T1;H7C2R9	C9JQV0;Q9BRJ6	3;3;1;1	3;3;1;1	3;3;1;1	104390000	92047000	85349000	Uncharacterized protein C7orf50	C7orf50	;	4	3	3	3	3	3	3	3	3	3	3	3	3	29.7	29.7	29.7	21.883	192	192;194;162;179	1	37	0	7.7894	29.7	29.7	29.7	95942000	108030000	99110000	97436000	2	0	1	15
C9JRL4	C9JRL4	7	1	1	276860000	0	0		MDH1		1	7	1	1	7	5	6	1	0	0	1	0	0	72.3	16.8	16.8	12.973	119	119	1	8	0	138.64	72.3	49.6	55.5	0	299680000	0	0	2	0	0	7
C9JRZ6;Q9NX63;F8WAR4;G3V1K1;F8WD73	C9JRZ6;Q9NX63;F8WAR4;G3V1K1	12;12;8;6;2	12;12;8;6;2	12;12;8;6;2	684500000	637620000	630390000	MICOS complex subunit MIC19	CHCHD3	;;;	5	12	12	12	9	9	10	9	9	10	9	9	10	51.3	51.3	51.3	26.694	232	232;227;241;138;63	1	133	0	46.904	37.5	37.1	44	547520000	668150000	594010000	554410000	6	5	6	74
C9JS50;Q687X5;Q687X5-2	C9JS50;Q687X5;Q687X5-2	2;2;1	2;2;1	2;2;1	0	28857000	0	Metalloreductase STEAP4	STEAP4	;;	3	2	2	2	1	2	0	1	2	0	1	2	0	5.9	5.9	5.9	38.579	339	339;459;283	1	17	0.0029091	2.3283	2.9	5.9	0	26500000	28543000	28386000	0	1	0	0	5
C9JS59;C9J266;Q5XPI4;Q5XPI4-2	C9JS59;C9J266;Q5XPI4;Q5XPI4-2	2;2;2;2	2;2;2;2	2;2;2;2	0	0	92303000	E3 ubiquitin-protein ligase RNF123	RNF123	;;;	4	2	2	2	2	2	2	2	2	2	2	2	2	2.2	2.2	2.2	81.531	721	721;762;1314;1316	1	11	0.0036092	2.2388	2.2	2.2	2.2	3110600	78599000	102900000	95444000	1	0	1	5
C9JVN9;Q9H9P8-2;Q9H9P8	C9JVN9;Q9H9P8-2;Q9H9P8	3;3;3	3;3;3	3;3;3	0	0	35237000	L-2-hydroxyglutarate dehydrogenase, mitochondrial	L2HGDH	;;	3	3	3	3	3	2	3	3	2	3	3	2	3	8.6	8.6	8.6	48.475	441	441;441;463	1	36	0	5.5747	8.6	5.2	8.6	26830000	38424000	23490000	39959000	0	1	1	8
C9JZ85;A8MV29;E7EU78;C9J1R1;Q9Y6K9;Q9Y6K9-2;F8W9A9;C9JN51;Q9Y6K9-3;C9J2V2;C9JH59	C9JZ85;A8MV29;E7EU78;C9J1R1;Q9Y6K9;Q9Y6K9-2;F8W9A9;C9JN51	5;5;5;5;5;5;4;3;2;1;1	5;5;5;5;5;5;4;3;2;1;1	5;5;5;5;5;5;4;3;2;1;1	48840000	60127000	71791000	NF-kappa-B essential modulator	IKBKG	;;;;;;;	11	5	5	5	4	5	4	4	5	4	4	5	4	36.3	36.3	36.3	21.653	190	190;411;412;418;419;487;368;250;320;195;205	1	50	0	8.7466	29.5	36.3	29.5	69339000	41600000	64628000	86407000	0	2	2	12
C9JZR2;O60716-5;O60716-3;O60716-2;O60716;O60716-8;O60716-7;O60716-6;O60716-4;O60716-21;O60716-19;O60716-18;O60716-17;O60716-13;O60716-11;O60716-10;O60716-9;O60716-24;O60716-23;O60716-22;O60716-20;O60716-16;O60716-15;O60716-14;O60716-12;O60716-29;O60716-27;O60716-26;O60716-25;O60716-32;O60716-31;O60716-30;O60716-28;E9PRE2;H0YC95;E9PKY0;E9PKL1	C9JZR2;O60716-5;O60716-3;O60716-2;O60716;O60716-8;O60716-7;O60716-6;O60716-4;O60716-21;O60716-19;O60716-18;O60716-17;O60716-13;O60716-11;O60716-10;O60716-9;O60716-24;O60716-23;O60716-22;O60716-20;O60716-16;O60716-15;O60716-14;O60716-12;O60716-29;O60716-27;O60716-26;O60716-25;O60716-32;O60716-31;O60716-30;O60716-28	22;22;22;22;22;21;21;21;21;20;20;20;20;20;20;20;20;19;19;19;19;19;19;19;19;14;14;14;14;13;13;13;13;6;2;2;1	22;22;22;22;22;21;21;21;21;20;20;20;20;20;20;20;20;19;19;19;19;19;19;19;19;14;14;14;14;13;13;13;13;6;2;2;1	22;22;22;22;22;21;21;21;21;20;20;20;20;20;20;20;20;19;19;19;19;19;19;19;19;14;14;14;14;13;13;13;13;6;2;2;1	610400000	620650000	607280000	Catenin delta-1	CTNND1	;;;;;;;;;;;;;;;;;;;;;;;;;;;;;;;;	37	22	22	22	18	19	15	18	19	15	18	19	15	33	33	33	104.85	938	938;933;939;962;968;912;918;941;947;832;838;861;867;879;885;908;914;811;817;840;846;858;864;887;893;610;616;639;645;589;595;618;624;261;123;126;128	1	296	0	194.51	25.7	27.8	19.8	555220000	734080000	758030000	657670000	15	17	13	156
C9JZY6;P62256;H7C4M9;C9JZG9;P62256-2;C9J8Q9	C9JZY6;P62256;H7C4M9;C9JZG9;P62256-2	5;5;4;4;4;2	5;5;4;4;4;2	5;5;4;4;4;2	363500000	352300000	365160000	Ubiquitin-conjugating enzyme E2 H	UBE2H	;;;;	6	5	5	5	4	4	4	4	4	4	4	4	4	46.3	46.3	46.3	13.818	123	123;183;62;103;152;149	1	66	0	91.05	39.8	34.1	34.1	482710000	314820000	326110000	327530000	3	4	4	38
C9K0W8;G8JLE0;H3BU86;O14662-2;O14662-4;O14662-5;O14662;Q96NX8;O14662-3;O14662-6	C9K0W8;G8JLE0;H3BU86;O14662-2;O14662-4;O14662-5;O14662;Q96NX8;O14662-3;O14662-6	2;2;2;2;2;2;2;1;1;1	2;2;2;2;2;2;2;1;1;1	2;2;2;2;2;2;2;1;1;1	16129000	0	0	Syntaxin-16	STX16;STX16-NPEPL1	;;;;;;;;;	10	2	2	2	2	1	1	2	1	1	2	1	1	7.8	7.8	7.8	35.269	308	308;325;382;304;308;321;325;202;115;272	1	15	0	4.2754	7.8	2.9	2.9	11674000	17560000	11907000	9867000	0	0	0	1
D3YTI9;A2AB90;O15533-2;O15533;O15533-3;O15533-4;C9JA35	D3YTI9;A2AB90;O15533-2;O15533;O15533-3;O15533-4	8;8;8;8;8;4;3	8;8;8;8;8;4;3	8;8;8;8;8;4;3	799280000	897830000	902300000	Tapasin	TAPBP	;;;;;	7	8	8	8	7	8	8	7	8	8	7	8	8	26.8	26.8	26.8	47.551	448	448;466;412;448;504;361;192	1	146	0	47.199	24.6	26.8	26.8	747110000	829180000	977930000	1136600000	10	8	11	107
D6R938;E9PBG7;E9PF82;Q13557-8;Q13557-12;Q13557-10;Q13557;Q13557-6;Q13557-11;Q13557-9;Q13557-5;Q13557-3;Q13557-4;H0Y9J2;H0Y9C2;H7BXS4;B7Z1Z6;Q9UQM7;Q9UQM7-2;E9PBE8;E7EQE4;D6RHX9;D6RFJ0;E7ERS6;E7ETC9;B4DVQ3;H7BZC6	D6R938;E9PBG7;E9PF82;Q13557-8;Q13557-12;Q13557-10;Q13557;Q13557-6;Q13557-11;Q13557-9;Q13557-5;Q13557-3;Q13557-4	14;14;14;14;14;14;14;14;14;13;13;13;13;6;6;4;3;3;3;2;2;1;1;1;1;1;1	14;14;14;14;14;14;14;14;14;13;13;13;13;6;6;4;3;3;3;2;2;1;1;1;1;1;1	10;10;10;10;10;10;10;10;10;9;9;9;9;6;4;0;0;0;0;0;0;0;0;0;0;0;0	322700000	290510000	317960000	Calcium/calmodulin-dependent protein kinase type II subunit delta	CAMK2D	;;;;;;;;;;;;	27	14	14	10	10	12	11	10	12	11	7	9	9	34.7	34.7	25.3	56.298	498	498;512;533;478;478;492;499;513;524;489;498;510;519;182;194;362;305;478;489;168;173;24;90;112;180;180;184	1	135	0	45.584	22.9	29.3	27.9	391020000	329440000	334270000	334620000	3	5	3	50
D6R992;Q01201;D6RIV7	D6R992;Q01201	5;5;1	5;5;1	5;5;1	43882000	55858000	53919000	Transcription factor RelB	RELB	;	3	5	5	5	4	3	3	4	3	3	4	3	3	15.6	15.6	15.6	61.776	576	576;579;58	1	41	0	23.169	12.7	9	9	61771000	60660000	52468000	66841000	1	2	1	18
D6R9Z7;P15954	D6R9Z7;P15954	2;2	2;2	2;2	136070000	99617000	109110000	Cytochrome c oxidase subunit 7C, mitochondrial	COX7C	;	2	2	2	2	2	2	2	2	2	2	2	2	2	32.1	32.1	32.1	6.3824	56	56;63	1	34	0	5.0723	32.1	32.1	32.1	113660000	147890000	122030000	118910000	2	0	1	12
D6RA70;Q9H6S0;D6RF50	D6RA70;Q9H6S0	6;6;1	6;6;1	6;6;1	30451000	28969000	0	Probable ATP-dependent RNA helicase YTHDC2	YTHDC2	;	3	6	6	6	4	3	1	4	3	1	4	3	1	11.5	11.5	11.5	82.988	739	739;1430;98	1	33	0	9.3091	8.5	6	1.2	19919000	45499000	35470000	12598000	1	1	1	12
D6RB81;Q9UHK6;Q9UHK6-5;V9GZ45;V9GYP4	D6RB81;Q9UHK6;Q9UHK6-5;V9GZ45;V9GYP4	3;3;3;2;2	3;3;3;2;2	3;3;3;2;2	40673000	39510000	55042000	Alpha-methylacyl-CoA racemase	AMACR	;;;;	5	3	3	3	2	2	2	2	2	2	2	2	2	10.6	10.6	10.6	40.674	367	367;382;394;260;288	1	30	0	8.8718	6.8	6.8	6.8	6772600	50002000	47180000	53504000	1	1	1	10
D6RB92;Q5JS54-3;Q5JS54;Q5JS54-2;D6REN3;E2QRC7;H7C465	D6RB92;Q5JS54-3;Q5JS54;Q5JS54-2;D6REN3;E2QRC7;H7C465	5;5;5;5;4;4;3	5;5;5;5;4;4;3	5;5;5;5;4;4;3	73017000	70396000	75984000	Proteasome assembly chaperone 4	PSMG4	;;;;;;	7	5	5	5	4	3	3	4	3	3	4	3	3	75.9	75.9	75.9	11.655	108	108;104;123;162;76;82;117	1	58	0	33.92	67.6	56.5	56.5	68900000	110940000	75053000	77286000	3	4	4	30
D6RBW1;P06730;P06730-3;P06730-2;H0Y8J7;D6RHE2;H0Y8X3;A6NMX2	D6RBW1;P06730;P06730-3;P06730-2;H0Y8J7	6;6;6;6;3;1;1;1	6;6;6;6;3;1;1;1	6;6;6;6;3;1;1;1	354130000	276820000	303210000	Eukaryotic translation initiation factor 4E	EIF4E	;;;;	8	6	6	6	5	5	6	5	5	6	5	5	6	23.7	23.7	23.7	28.512	245	245;217;237;248;155;90;171;242	1	74	0	32.29	19.2	19.2	23.7	273100000	442870000	336960000	345460000	5	3	3	37
D6RCM8;O95379-3;O95379-2;O95379;O95379-4	D6RCM8;O95379-3;O95379-2;O95379;O95379-4	3;3;3;3;3	3;3;3;3;3	3;3;3;3;3	0	74272000	85430000	Tumor necrosis factor alpha-induced protein 8	TNFAIP8	;;;;	5	3	3	3	3	3	3	3	3	3	3	3	3	15.5	15.5	15.5	23.257	200	200;188;190;198;210	1	29	0	6.4277	15.5	15.5	15.5	82179000	66710000	89935000	96722000	1	1	1	10
D6RDH4;Q9Y3D8-2;Q9Y3D8	D6RDH4;Q9Y3D8-2;Q9Y3D8	4;4;4	4;4;4	4;4;4	89220000	0	0	Adenylate kinase isoenzyme 6	TAF9;AK6	;;	3	4	4	4	3	4	4	3	4	4	3	4	4	30.5	30.5	30.5	16.919	141	141;169;172	1	45	0	7.5301	23.4	30.5	30.5	94864000	77537000	95266000	52152000	2	0	1	7
D6REA1;Q9H173;D6RIU8;D6R940;D6RG16;D6RBP7;D6RAI3	D6REA1;Q9H173	6;6;2;1;1;1;1	6;6;2;1;1;1;1	6;6;2;1;1;1;1	91182000	89945000	100030000	Nucleotide exchange factor SIL1	SIL1	;	7	6	6	6	4	3	3	4	3	3	4	3	3	19.9	19.9	19.9	52.748	468	468;461;163;94;123;123;125	1	49	0	20.774	9.4	7.7	7.7	91910000	82243000	72893000	90742000	1	1	1	17
D6REK3;Q6UX04-2;Q6UX04	D6REK3;Q6UX04-2;Q6UX04	2;2;2	2;2;2	2;2;2	23692000	0	0	Peptidyl-prolyl cis-trans isomerase CWC27 homolog	CWC27	;;	3	2	2	2	2	1	1	2	1	1	2	1	1	7.6	7.6	7.6	42.996	381	381;390;472	1	13	0.0017469	2.6323	7.6	2.9	2.9	20780000	25856000	21384000	14524000	1	1	1	10
D6REL8;P02675	D6REL8;P02675	1;1	1;1	1;1	6364800	0	0	Fibrinogen beta chain;Fibrinopeptide B;Fibrinogen beta chain	FGB	;	2	1	1	1	1	0	0	1	0	0	1	0	0	5.1	5.1	5.1	31.18	272	272;491	1	1	0.0097616	1.6566	5.1	0	0	0	6929700	0	0	1	0	0	1
D6REX3;O94979-6;O94979-3;O94979-10;O94979-4;O94979-9;O94979-2;O94979;O94979-8;D6RHZ5;H7BXG7;O94979-7;O94979-5;H0YAB3;H0Y8V7;H0Y9T9;H0Y9K1;H0Y8W8;D6RE64;D6RCQ9;H0YAF5;D6RBT0;D6RHE8;H0Y9V3	D6REX3;O94979-6;O94979-3;O94979-10;O94979-4;O94979-9;O94979-2;O94979;O94979-8;D6RHZ5;H7BXG7;O94979-7;O94979-5	34;33;33;33;33;33;33;33;33;27;25;25;20;16;10;8;8;6;4;4;4;2;2;2	34;33;33;33;33;33;33;33;33;27;25;25;20;16;10;8;8;6;4;4;4;2;2;2	34;33;33;33;33;33;33;33;33;27;25;25;20;16;10;8;8;6;4;4;4;2;2;2	1750800000	1583600000	1481100000	Protein transport protein Sec31A	SEC31A	;;;;;;;;;;;;	24	34	34	34	30	23	28	30	23	28	30	23	28	35.9	35.9	35.9	136.22	1251	1251;1067;1106;1166;1181;1200;1205;1220;1233;877;969;969;509;443;285;235;237;383;164;166;181;81;92;219	1	420	0	96.617	32.3	21.2	25.2	1492100000	2007900000	1365700000	1468600000	18	14	14	206
D6RGE2;Q96CN7	D6RGE2;Q96CN7	2;2	2;2	2;2	0	32875000	35437000	Isochorismatase domain-containing protein 1	ISOC1	;	2	2	2	2	1	2	2	1	2	2	1	2	2	13.3	13.3	13.3	20.239	188	188;298	1	21	0	4.4214	7.4	13.3	13.3	25162000	21102000	33185000	37688000	0	1	1	7
D6RGG3;Q99715;Q99715-4;Q99715-2;H0Y5N9;H0Y4P7;H0Y991	D6RGG3;Q99715;Q99715-4	38;38;37;14;6;5;4	38;38;37;14;6;5;4	38;38;37;14;6;5;4	553240000	519440000	555350000	Collagen alpha-1(XII) chain	COL12A1	;;	7	38	38	38	33	28	28	33	28	28	33	28	28	17.2	17.2	17.2	333.2	3062	3062;3063;2987;1899;756;638;207	1	373	0	93.23	15.1	12.1	13	593990000	687530000	531830000	536400000	16	8	10	127
D6RGI3;D6RER5;Q9NVA2;Q9NVA2-2;D6RDU5;H0Y961;B1AMS2;F5H1J5;Q14141-2;Q14141-4;Q14141;D6RDP1;D6R9Y6;B4E049;H0Y9G8;Q14141-3	D6RGI3;D6RER5;Q9NVA2;Q9NVA2-2;D6RDU5	16;16;16;15;13;7;7;7;7;7;7;6;6;6;3;2	16;16;16;15;13;7;7;7;7;7;7;6;6;6;3;2	13;13;13;12;10;6;5;5;5;5;5;6;6;4;3;1	634660000	620140000	601370000	Septin-11	11\Sep	;;;;	16	16	16	13	10	12	13	10	12	13	7	9	10	50.1	50.1	42.1	49.005	425	425;432;429;439;372;160;431;457;427;429;434;126;136;369;82;267	1	184	0	114.52	32.9	38.4	43.1	618520000	642540000	556690000	468510000	9	11	12	112
D6RGY8;D6RFI3;E7EQR8;Q9GZM5;H0Y9A1	D6RGY8;D6RFI3;E7EQR8;Q9GZM5;H0Y9A1	3;3;3;3;2	3;3;3;3;2	3;3;3;3;2	62332000	0	0	Protein YIPF3;Protein YIPF3, 36 kDa form III	YIPF3	;;;;	5	3	3	3	2	1	1	2	1	1	2	1	1	39.4	39.4	39.4	12.29	109	109;262;356;350;135	1	28	0	10.979	29.4	8.3	8.3	77305000	56400000	41730000	44211000	1	0	0	13
D6RHW1;D6RIY1;D6RGK3;D6RIV9;D6RIE8;Q9HBM6;Q16594	D6RHW1;D6RIY1;D6RGK3;D6RIV9;D6RIE8;Q9HBM6;Q16594	2;2;2;2;2;2;2	2;2;2;2;2;2;2	2;2;2;2;2;2;2	17632000	0	18681000	Transcription initiation factor TFIID subunit 9B;Transcription initiation factor TFIID subunit 9	TAF9;TAF9B	;;;;;;	7	2	2	2	2	1	2	2	1	2	2	1	2	18.6	18.6	18.6	11.57	102	102;127;135;166;197;251;264	1	20	0.00025767	3.0517	18.6	7.8	18.6	13418000	19554000	9672100	21033000	1	1	1	15
D6RIE3;P14406;D6RGV5;H0UI06;D6R9C3;D6RA35	D6RIE3;P14406;D6RGV5;H0UI06	3;3;2;2;1;1	3;3;2;2;1;1	3;3;2;2;1;1	143170000	0	0	Cytochrome c oxidase subunit 7A2, mitochondrial	COX7A2	;;;	6	3	3	3	3	2	2	3	2	2	3	2	2	34.1	34.1	34.1	10.264	91	91;83;103;115;53;76	1	29	0	8.9087	34.1	25.3	25.3	93157000	200300000	91270000	97889000	3	2	2	24
D6RIW8;Q9NW82	D6RIW8;Q9NW82	3;3	3;3	3;3	25047000	19553000	0	WD repeat-containing protein 70	WDR70	;	2	3	3	3	2	2	2	2	2	2	2	2	2	13.7	13.7	13.7	43.24	387	387;654	1	21	0	6.4632	6.2	6.2	6.2	28888000	27433000	19962000	13243000	1	2	1	15
D6RIY6;Q06265;Q06265-2;D6R905;Q06265-3;Q06265-4;D6RAP4;D6RA17;H0Y9L5	D6RIY6;Q06265;Q06265-2;D6R905;Q06265-3;Q06265-4	5;5;5;3;3;3;2;2;1	5;5;5;3;3;3;2;2;1	5;5;5;3;3;3;2;2;1	108360000	133810000	131680000	Exosome complex component RRP45	EXOSC9	;;;;;	9	5	5	5	5	5	3	5	5	3	5	5	3	14.4	14.4	14.4	46.977	423	423;439;456;226;355;372;86;242;172	1	57	0	12.491	14.4	14.4	8	137190000	142720000	163650000	104590000	4	2	1	30
E1P5H9;Q96BD0-3;Q96BD0-4;Q96BD0;Q96BD0-2	E1P5H9;Q96BD0-3;Q96BD0-4;Q96BD0	3;3;3;3;1	3;3;3;3;1	3;3;3;3;1	39242000	41639000	0	Solute carrier organic anion transporter family member 4A1	SLCO4A1	;;;	5	3	3	3	3	3	0	3	3	0	3	3	0	4.7	4.7	4.7	65.837	620	620;661;722;722;583	1	24	0.0002578	3.0569	4.7	4.7	0	15802000	45915000	41359000	0	1	0	0	7
E2QRB3;P32322-2;P32322;P32322-3;J3QR88;J3QLK9;J3QL23;J3QL32;J3QL24;J3KQ22;J3QKT4;J3KTA8;J3QKT3;J3QRZ0;J3KSA9	E2QRB3;P32322-2;P32322;P32322-3;J3QR88;J3QLK9;J3QL23;J3QL32;J3QL24;J3KQ22;J3QKT4	6;6;6;6;4;4;4;4;4;4;3;2;2;2;1	5;5;5;5;4;4;4;4;4;4;2;2;2;2;1	5;5;5;5;4;4;4;4;4;4;2;2;2;2;1	62441000	57447000	58609000	Pyrroline-5-carboxylate reductase 1, mitochondrial;Pyrroline-5-carboxylate reductase	PYCR1	;;;;;;;;;;	15	6	5	5	5	4	3	4	3	2	4	3	2	30.2	25.7	25.7	30.213	288	288;316;319;346;132;165;173;217;225;253;242;84;94;115;109	1	37	0	7.4162	26.7	20.8	14.9	42100000	97691000	63367000	44578000	3	2	2	18
E2QRF9;O75496;H7C608;C9K0U5	E2QRF9;O75496;H7C608	3;3;2;1	3;3;2;1	3;3;2;1	50418000	0	48187000	Geminin	GMNN	;;	4	3	3	3	3	0	3	3	0	3	3	0	3	29.6	29.6	29.6	20.539	179	179;209;102;65	1	27	0	14.272	29.6	0	29.6	61256000	49421000	0	61404000	3	0	1	16
E2QRH7;Q9NYP7;Q9NYP7-2;Q9NYP7-3	E2QRH7;Q9NYP7;Q9NYP7-2	3;3;3;1	3;3;3;1	3;3;3;1	130070000	0	121080000	Elongation of very long chain fatty acids protein 5	ELOVL5	;;	4	3	3	3	3	2	3	3	2	3	3	2	3	10.4	10.4	10.4	34.202	289	289;299;326;88	1	30	0	21.781	10.4	7.6	10.4	175090000	174640000	150800000	165690000	1	0	0	8
E2QRM6;Q9H2U2;Q9H2U2-2;H0Y9D8;Q9H2U2-6;Q9H2U2-3;D6R967;D6RGV9;B4DFH3;Q9H2U2-4;D6RGI1;H0YAK2;D6RAD3	E2QRM6;Q9H2U2;Q9H2U2-2;H0Y9D8;Q9H2U2-6;Q9H2U2-3;D6R967	12;12;12;8;8;8;7;5;5;5;2;1;1	12;12;12;8;8;8;7;5;5;5;2;1;1	12;12;12;8;8;8;7;5;5;5;2;1;1	766960000	683440000	718080000	Inorganic pyrophosphatase 2, mitochondrial	PPA2	;;;;;;	13	12	12	12	10	12	12	10	12	12	10	12	12	48.7	48.7	48.7	35.731	316	316;334;349;226;232;305;191;195;202;168;88;69;113	1	193	0	41.836	39.9	48.7	48.7	784850000	789560000	851160000	877970000	10	9	10	102
E5KLJ6;E5KLJ5;O60313;O60313-2;E5KLK1;E5KLJ9;H7C141;H7C321;C9JY58;C9JMB8	E5KLJ6;E5KLJ5;O60313;O60313-2;E5KLK1;E5KLJ9	15;15;15;15;14;14;3;2;1;1	15;15;15;15;14;14;3;2;1;1	15;15;15;15;14;14;3;2;1;1	208600000	188230000	175490000	Dynamin-like 120 kDa protein, mitochondrial;Dynamin-like 120 kDa protein, form S1	OPA1	;;;;;	10	15	15	15	12	11	12	12	11	12	12	11	12	19.1	19.1	19.1	113.49	978	978;1015;960;997;961;979;183;185;84;243	1	148	0	34.683	14.4	12.4	13.5	176460000	283340000	199620000	226440000	8	5	3	54
E5RFF9;Q9BRT9	E5RFF9;Q9BRT9	2;2	2;2	2;2	0	0	17697000	DNA replication complex GINS protein SLD5;DNA replication complex GINS protein SLD5;DNA replication complex GINS protein SLD5, N-terminally processed	GINS4	;	2	2	2	2	2	1	2	2	1	2	2	1	2	17.2	17.2	17.2	22.653	192	192;223	1	15	0	4.535	17.2	9.9	17.2	20974000	27843000	14125000	18299000	1	0	0	5
E5RFP0;Q8WVJ2	E5RFP0;Q8WVJ2	4;4	4;4	4;4	123170000	0	46462000	NudC domain-containing protein 2	NUDCD2	;	2	4	4	4	3	3	4	3	3	4	3	3	4	36.4	36.4	36.4	14.745	132	132;157	1	40	0	9.5474	28.8	28	36.4	150790000	101120000	47802000	100330000	2	1	1	24
E5RG17;Q6P1N9;G5EA19;U3KQS5;E5RGF2;Q6P1N9-2;H0YBX2;E5RG62;E5RK70;E5RH86	E5RG17;Q6P1N9;G5EA19;U3KQS5;E5RGF2;Q6P1N9-2;H0YBX2	5;5;4;4;4;4;3;2;2;1	5;5;4;4;4;4;3;2;2;1	5;5;4;4;4;4;3;2;2;1	64160000	77704000	86622000	Putative deoxyribonuclease TATDN1	TATDN1	;;;;;;	10	5	5	5	2	3	4	2	3	4	2	3	4	18.9	18.9	18.9	36.418	322	322;297;207;210;210;250;202;93;110;40	1	38	0	13.428	8.4	11.5	15.5	65136000	49131000	110130000	136030000	2	2	1	22
E5RGS9;Q9NRG0	E5RGS9;Q9NRG0	3;3	3;3	3;3	111580000	68271000	82193000	Chromatin accessibility complex protein 1	CHRAC1	;	2	3	3	3	3	3	3	3	3	3	3	3	3	58.9	58.9	58.9	6.2643	56	56;131	1	36	0	10.811	58.9	58.9	58.9	71744000	105530000	80223000	82373000	2	0	2	12
E5RHG8;Q15369;Q15369-2;R4GMY8	E5RHG8;Q15369;Q15369-2;R4GMY8	6;6;5;3	6;6;5;3	6;6;5;3	1275300000	1318000000	1234000000	Transcription elongation factor B polypeptide 1	TCEB1	;;;	4	6	6	6	6	5	6	6	5	6	6	5	6	82	82	82	9.9601	89	89;112;96;65	1	117	0	131.97	82	73	82	1259200000	1464400000	1121700000	1328900000	8	6	9	93
E5RHW4;O94905;E5RJ09;O94905-2;O94905-3	E5RHW4;O94905;E5RJ09	11;11;6;2;2	11;11;6;2;2	8;8;5;1;1	461350000	510410000	508900000	Erlin-2	ERLIN2	;;	5	11	11	8	10	9	9	10	9	9	7	6	6	39.3	39.3	30.2	37.725	338	338;339;197;152;206	1	133	0	75.507	36.7	31.7	31.7	489950000	503350000	524850000	485690000	6	7	6	75
E5RIM7;O00244;E5RGN3	E5RIM7;O00244;E5RGN3	4;4;3	4;4;3	4;4;3	419560000	432810000	317100000	Copper transport protein ATOX1	ATOX1	;;	3	4	4	4	3	3	3	3	3	3	3	3	3	71.2	71.2	71.2	7.8741	73	73;68;59	1	51	0	65.317	46.6	46.6	46.6	331360000	419890000	458640000	341290000	4	4	3	40
E5RIP4;Q15043-2;Q15043-3;Q15043;E5RFZ8;E5RGA7;E5RJ40;E5RJG5	E5RIP4;Q15043-2;Q15043-3;Q15043;E5RFZ8;E5RGA7;E5RJ40;E5RJG5	3;3;3;3;2;2;2;2	3;3;3;3;2;2;2;2	3;3;3;3;2;2;2;2	410380000	429440000	439970000	Zinc transporter ZIP14	SLC39A14	;;;;;;;	8	3	3	3	3	2	2	3	2	2	3	2	2	29	29	29	17	155	155;481;492;492;89;90;122;127	1	53	0	78.962	29	20.6	20.6	532980000	541790000	219460000	220430000	3	3	5	44
E5RIW3;E5RJD8;O75347;E5RHG6;B4DT30;E5RIX8	E5RIW3;E5RJD8;O75347;E5RHG6;B4DT30	10;10;10;8;7;3	10;10;10;8;7;3	10;10;10;8;7;3	1469600000	1546500000	1483900000	Tubulin-specific chaperone A	TBCA	;;;;	6	10	10	10	9	8	10	9	8	10	9	8	10	76.2	76.2	76.2	10.08	84	84;119;108;131;129;79	1	152	0	80.583	67.9	58.3	76.2	1441300000	1621300000	1390400000	1640400000	8	10	11	105
E5RJR5;P63208;E7ERH2;F8W8N3;P63208-2;E5RGM3;E5RHM3;E5RGM4	E5RJR5;P63208;E7ERH2;F8W8N3;P63208-2	11;11;8;8;8;5;1;1	11;11;8;8;8;5;1;1	9;9;6;6;6;3;0;0	682610000	681990000	779070000	S-phase kinase-associated protein 1	SKP1	;;;;	8	11	11	9	9	10	9	9	10	9	7	8	7	77.3	77.3	49.7	18.72	163	163;163;142;158;160;102;39;41	1	141	0	81.243	73	77.3	63.2	881890000	710200000	833480000	798300000	8	6	3	76
E7EM64;Q7L5N1;H7C3T0	E7EM64;Q7L5N1	12;12;3	12;12;3	12;12;3	662650000	574010000	629690000	COP9 signalosome complex subunit 6	COPS6	;	3	12	12	12	11	12	11	11	12	11	11	12	11	46.9	46.9	46.9	36.064	326	326;327;123	1	186	0	82.993	39.9	46.9	39.6	732730000	678760000	613100000	614880000	8	5	11	91
E7EMM4;Q13510;Q13510-2;E7ERV9;Q13510-3	E7EMM4;Q13510;Q13510-2;E7ERV9;Q13510-3	5;5;5;4;3	5;5;5;4;3	5;5;5;4;3	94021000	73265000	98090000	Acid ceramidase;Acid ceramidase subunit alpha;Acid ceramidase subunit beta	ASAH1	;;;;	5	5	5	5	3	5	5	3	5	5	3	5	5	18.1	18.1	18.1	41.796	370	370;395;411;305;389	1	50	0	7.6369	13	18.1	18.1	103730000	81130000	89291000	95662000	1	3	3	19
E7EN19;E7ESS2;E7ENQ1;G3XAA2;H7C360;O95819-4;O95819-2;O95819-5;G5E948;O95819;O95819-3;E7EX83;C9J840;H7C0P6;Q9UKE5-7;Q9UKE5-3;Q9UKE5-4;Q9UKE5;F5H5M9;Q9UKE5-8;Q9UKE5-5;Q9UKE5-6;Q9UKE5-2;C9J338;F5H865;H7C3Z6;E7ETN6	E7EN19;E7ESS2;E7ENQ1;G3XAA2;H7C360;O95819-4;O95819-2;O95819-5;G5E948;O95819;O95819-3;E7EX83;C9J840;H7C0P6	17;17;16;16;16;16;16;16;15;15;15;12;12;10;6;6;6;6;5;5;5;5;5;4;4;2;1	17;17;16;16;16;16;16;16;15;15;15;12;12;10;6;6;6;6;5;5;5;5;5;4;4;2;1	10;10;9;9;9;9;9;9;8;8;8;7;7;7;0;0;0;0;0;0;0;0;0;0;0;1;0	188700000	188880000	187990000	Mitogen-activated protein kinase kinase kinase kinase 4	MAP4K4	;;;;;;;;;;;;;	27	17	17	10	11	11	13	11	11	13	6	6	9	17.6	17.6	13.1	144.92	1272	1272;1279;1154;1166;1170;1165;1211;1242;1320;1239;1319;1038;1042;1056;1297;1305;1352;1360;1312;1268;1276;1323;1331;350;1338;258;102	1	158	0	33.495	11.6	11.9	15.3	196260000	158870000	206440000	226290000	4	6	5	58
E7ENC1;F8WBI9;E7ETT4;E7EUY3;E7ETT1;E9PDR0;C9JQS9;E7EX59;P05166;P05166-2;C9JVY9;E9PEC3;H7C5C9	E7ENC1;F8WBI9;E7ETT4;E7EUY3;E7ETT1;E9PDR0;C9JQS9;E7EX59;P05166;P05166-2;C9JVY9;E9PEC3	3;3;3;3;3;3;3;3;3;3;2;2;1	3;3;3;3;3;3;3;3;3;3;2;2;1	3;3;3;3;3;3;3;3;3;3;2;2;1	0	174270000	0	Propionyl-CoA carboxylase beta chain, mitochondrial	PCCB	;;;;;;;;;;;	13	3	3	3	1	2	1	1	2	1	1	2	1	14.2	14.2	14.2	32.468	303	303;405;482;516;520;550;559;570;539;559;191;423;163	1	28	0	4.5658	2.3	8.9	2.3	198690000	158540000	326170000	315560000	0	0	1	7
E7ENU4;P55265;P55265-4;P55265-5;H0YCK3;P55265-3;P55265-2	E7ENU4;P55265;P55265-4;P55265-5;H0YCK3;P55265-3;P55265-2	22;22;22;21;20;20;20	22;22;22;21;20;20;20	22;22;22;21;20;20;20	393650000	432460000	401010000	Double-stranded RNA-specific adenosine deaminase	ADAR	;;;;;;	7	22	22	22	20	15	21	20	15	21	20	15	21	21.7	21.7	21.7	140.83	1269	1269;1226;1269;931;1195;1181;1200	1	221	0	65.971	20.4	15.8	21	396260000	486600000	311690000	519830000	13	10	9	96
E7ENV7;Q86YQ8;Q86VY2	E7ENV7;Q86YQ8;Q86VY2	3;3;2	2;2;1	2;2;1	18794000	0	0	Copine-8	CPNE8	;;	3	3	2	2	3	1	2	2	0	1	2	0	1	6.5	4.9	4.9	62.233	552	552;564;233	1	14	0.00050929	2.8847	6.5	1.6	4	14581000	20462000	0	12063000	0	0	1	4
E7EP00;G5EA31;P53992;B4DZT4	E7EP00;G5EA31;P53992	17;17;17;6	17;17;17;6	17;17;17;6	432020000	432830000	423490000	Protein transport protein Sec24C	SEC24C	;;	4	17	17	17	15	15	14	15	15	14	15	15	14	25.3	25.3	25.3	106.62	975	975;1042;1094;342	1	211	0	57.178	21.8	21.8	19.7	514040000	447000000	466670000	442840000	10	8	9	106
E7EP42;E9PB91;B1APJ0;O14925;Q5SRD1;H0Y6X5;S4R2X5	E7EP42;E9PB91;B1APJ0;O14925;Q5SRD1;H0Y6X5;S4R2X5	2;2;2;2;2;1;1	2;2;2;2;2;1;1	2;2;2;2;2;1;1	35256000	0	0	Mitochondrial import inner membrane translocase subunit Tim23;Putative mitochondrial import inner membrane translocase subunit Tim23B	TIMM23B;TIMM23	;;;;;;	7	2	2	2	2	1	0	2	1	0	2	1	0	49.6	49.6	49.6	12.701	123	123;161;172;209;257;107;118	1	18	0	13.733	49.6	16.3	0	25584000	47813000	19832000	0	1	0	0	7
E7EPB3;P50914	E7EPB3;P50914	6;6	6;6	6;6	2166600000	2339200000	2279100000	60S ribosomal protein L14	RPL14	;	2	6	6	6	5	5	4	5	5	4	5	5	4	44.4	44.4	44.4	14.558	124	124;215	1	111	0	14.814	38.7	38.7	32.3	2220500000	2538600000	2404400000	2027000000	5	6	4	66
E7EPN9;Q9Y520-6;Q9Y520-4;Q9Y520-5;Q9Y520;Q9Y520-7;Q9Y520-3;Q9Y520-2;H7C5N8	E7EPN9;Q9Y520-6;Q9Y520-4;Q9Y520-5;Q9Y520;Q9Y520-7;Q9Y520-3;Q9Y520-2	29;29;29;29;29;29;27;26;7	29;29;29;29;29;29;27;26;7	28;28;28;28;28;28;26;26;7	587160000	611460000	590470000	Protein PRRC2C	PRRC2C	;;;;;;;	9	29	29	28	20	20	19	20	20	19	19	19	18	13.7	13.7	13.4	308.77	2819	2819;2752;2817;2849;2896;2898;2700;2653;1300	1	307	0	46.98	9.6	9.2	7.7	736370000	603890000	558100000	577530000	10	11	10	120
E7EPV7;P37840-2;P37840;P37840-3;D6RA31;Q16143	E7EPV7;P37840-2;P37840;P37840-3;D6RA31	6;6;6;4;3;1	6;6;6;4;3;1	6;6;6;4;3;1	699050000	773120000	699010000	Alpha-synuclein	SNCA	;;;;	6	6	6	6	6	6	6	6	6	6	6	6	6	60	60	60	11.777	115	115;112;140;126;66;134	1	105	0	177.22	60	60	60	677420000	573240000	924270000	715110000	4	4	7	63
E7EPW2;B4DQG6;B4DFJ5;P82663	E7EPW2;B4DQG6;B4DFJ5;P82663	3;3;3;3	3;3;3;3	3;3;3;3	69594000	59311000	55532000	28S ribosomal protein S25, mitochondrial	MRPS25	;;;	4	3	3	3	2	3	3	2	3	3	2	3	3	38.2	38.2	38.2	12.946	110	110;129;145;173	1	32	0	12.479	27.3	38.2	38.2	56874000	63547000	73105000	68627000	1	0	1	9
E7EQ69;Q9GZZ1;C9J5D1;Q9GZZ1-2;B0AZT5;C9JZU6;C9J5J3;F8WCK0	E7EQ69;Q9GZZ1;C9J5D1;Q9GZZ1-2;B0AZT5	12;12;10;8;6;4;4;3	12;12;10;8;6;4;4;3	12;12;10;8;6;4;4;3	198230000	194650000	140470000	N-alpha-acetyltransferase 50	NAA50	;;;;	8	12	12	12	8	7	5	8	7	5	8	7	5	64.3	64.3	64.3	19.311	168	168;169;129;81;95;57;58;48	1	100	0	39.767	50.6	44.6	29.8	113000000	275100000	142870000	72339000	6	3	2	47
E7EQS0;P20839;P20839-3;P20839-7;P20839-5;P20839-6;C9K0R9;C9J381;P20839-2;P20839-4	E7EQS0;P20839;P20839-3;P20839-7;P20839-5;P20839-6;C9K0R9;C9J381;P20839-2;P20839-4	4;4;4;4;4;4;3;3;3;3	3;3;3;3;3;3;2;2;2;2	3;3;3;3;3;3;2;2;2;2	43359000	0	55890000	Inosine-5-monophosphate dehydrogenase 1;Inosine-5-monophosphate dehydrogenase	IMPDH1	;;;;;;;;;	10	4	3	3	3	2	2	3	1	2	3	1	2	10.9	9.4	9.4	57.015	530	530;514;563;566;589;599;289;513;489;509	1	28	0	13.961	9.4	4	7.4	40278000	43469000	23575000	51140000	3	0	0	15
E7ER89;O95340;O95340-2	E7ER89;O95340;O95340-2	7;7;7	7;7;7	7;7;7	157920000	119730000	144180000	Bifunctional 3-phosphoadenosine 5-phosphosulfate synthase 2;Sulfate adenylyltransferase;Adenylyl-sulfate kinase	PAPSS2	;;	3	7	7	7	5	6	6	5	6	6	5	6	6	15	15	15	69.997	618	618;614;619	1	110	0	17.752	11	12.8	12.8	149700000	128140000	145100000	142630000	3	5	6	38
E7ERB7;B7ZLZ0;Q9P107;K7EJC2	E7ERB7;B7ZLZ0;Q9P107	5;5;5;2	5;5;5;2	5;5;5;2	40343000	0	0	GEM-interacting protein	GMIP	;;	4	5	5	5	3	1	1	3	1	1	3	1	1	7.1	7.1	7.1	103.7	941	941;944;970;303	1	27	0	8.3469	4.6	1	1.3	0	31654000	0	7111700	2	1	0	12
E7ERH3;Q68CZ2-2;Q68CZ2;Q68CZ2-4;Q68CZ2-3;C9JHU5;E9PCX8;C9JWN9;C9JTD0	E7ERH3;Q68CZ2-2;Q68CZ2;Q68CZ2-4;Q68CZ2-3;C9JHU5;E9PCX8	6;6;6;4;4;3;3;2;2	6;6;6;4;4;3;3;2;2	6;6;6;4;4;3;3;2;2	66540000	64417000	0	Tensin-3	TNS3	;;;;;;	9	6	6	6	6	4	2	6	4	2	6	4	2	8.5	8.5	8.5	129.07	1205	1205;1205;1445;250;391;544;1249;108;138	1	57	0	12.711	8.5	5.1	2.8	63402000	96191000	66973000	40915000	4	0	0	17
E7ERI8;E7EW49;F5H604;E3W994;J3KR49;O75122;E9PBA6;F5H3X0;H7C4X8;H7C5M8;H7C4I5;B3KR06;E7ENG2;O75122-2;C9J668;D6RBU8	E7ERI8;E7EW49;F5H604;E3W994;J3KR49;O75122;E9PBA6;F5H3X0	15;15;15;14;13;13;12;11;4;3;2;2;2;2;1;1	15;15;15;14;13;13;12;11;4;3;2;2;2;2;1;1	11;11;11;10;9;9;8;8;3;2;2;2;2;2;1;1	164150000	138000000	134140000	CLIP-associating protein 2	CLASP2	;;;;;;;	16	15	15	11	11	8	7	11	8	7	7	4	6	12.1	12.1	9.5	165.63	1513	1513;1514;1505;1273;1293;1294;995;1063;184;220;205;454;458;431;178;233	1	136	0	27.081	8.7	5.9	6.3	148820000	192580000	127770000	125710000	6	5	5	58
E7ERK9;Q9UI10-3;Q9UI10;Q9UI10-2;H7C2L8;F8W8L6	E7ERK9;Q9UI10-3;Q9UI10;Q9UI10-2;H7C2L8	4;4;4;4;2;1	4;4;4;4;2;1	4;4;4;4;2;1	37446000	39615000	39490000	Translation initiation factor eIF-2B subunit delta	EIF2B4	;;;;	6	4	4	4	3	3	3	3	3	3	3	3	3	13.6	13.6	13.6	59.714	544	544;522;523;543;194;235	1	35	0	13.158	10.1	10.1	10.7	37243000	45878000	44394000	37753000	1	1	2	18
E7ES43;O95757;E9PDE8;D6RJ96	E7ES43;O95757;E9PDE8;D6RJ96	30;30;28;17	26;26;24;13	26;26;24;13	770700000	713010000	815790000	Heat shock 70 kDa protein 4L	HSPA4L	;;;	4	30	26	26	25	22	25	21	18	21	21	18	21	44.3	38.4	38.4	97.658	870	870;839;813;531	1	283	0	206.48	39	33.9	38.4	774150000	838160000	760050000	837470000	14	10	13	145
E7ES96;P49768-2;P49768;P49768-3;P49768-5;P49768-6;P49768-7;G3V3Z0;E5RFW4;G3V499;G3V2G7;E5RG63;E5RJ26;B1AP22;P49768-4;P49810-3;P49810	E7ES96;P49768-2;P49768;P49768-3;P49768-5;P49768-6;P49768-7	3;3;3;2;2;2;2;1;1;1;1;1;1;1;1;1;1	3;3;3;2;2;2;2;1;1;1;1;1;1;1;1;1;1	3;3;3;2;2;2;2;1;1;1;1;1;1;1;1;1;1	0	22322000	0	Presenilin;Presenilin-1;Presenilin-1 NTF subunit;Presenilin-1 CTF subunit;Presenilin-1 CTF12	PSEN1	;;;;;;	17	3	3	3	2	2	1	2	2	1	2	2	1	12.5	12.5	12.5	42.082	375	375;463;467;374;378;409;434;135;144;147;155;304;360;481;184;447;448	1	18	0	11.722	10.1	10.1	5.1	11733000	14771000	23657000	12355000	1	2	1	13
E7ESC6;E9PEN8;Q9UIA9;E5RIW1;H0YBE1	E7ESC6;E9PEN8;Q9UIA9	19;19;19;6;4	19;19;19;6;4	18;18;18;6;4	300460000	290520000	295170000	Exportin-7	XPO7	;;	5	19	19	18	15	12	13	15	12	13	14	11	12	20.7	20.7	19.7	124.07	1088	1088;1096;1087;237;190	1	181	0	45.01	16.6	13.4	14.5	301240000	402160000	379600000	304410000	9	7	3	82
E7ESK6;E9PBI9;P34741;E5RJB8;E5RHU3	E7ESK6;E9PBI9;P34741;E5RJB8;E5RHU3	2;2;2;1;1	2;2;2;1;1	2;2;2;1;1	0	29987000	0	Syndecan;Syndecan-2	SDC2	;;;;	5	2	2	2	1	2	1	1	2	1	1	2	1	14.5	14.5	14.5	18.388	165	165;172;201;137;145	1	18	0.00026035	3.2032	5.5	14.5	9.1	11124000	25062000	30651000	15065000	0	2	1	5
E7ESL0;J3KQY1;Q9NWU5-2;Q9NWU5-3;Q9NWU5	E7ESL0;J3KQY1;Q9NWU5-2;Q9NWU5-3;Q9NWU5	3;3;3;3;3	3;3;3;3;3	3;3;3;3;3	0	73322000	0	39S ribosomal protein L22, mitochondrial	MRPL22	;;;;	5	3	3	3	1	2	1	1	2	1	1	2	1	19.3	19.3	19.3	24.325	212	212;232;120;126;206	1	19	0	8.9164	7.5	13.2	7.5	0	19981000	73292000	29879000	1	2	1	15
E7ESP4;E7EMF1;E9PB77;D6RG08	E7ESP4;E7EMF1;E9PB77	26;22;15;3	1;1;1;0	1;1;1;0	189980000	174480000	206740000		ITGA2	;;	4	26	1	1	23	24	25	1	1	1	1	1	1	37.9	2.1	2.1	102.83	942	942;815;641;175	1	24	0	83.367	34.9	36	37	186110000	189120000	185830000	215550000	1	2	1	20
E7EST9;B5MEG5;O94966-7;O94966-6;O94966-5;E7ESU0;O94966-4;O94966-3;O94966;O94966-2	E7EST9;B5MEG5;O94966-7;O94966-6;O94966-5;E7ESU0;O94966-4;O94966-3;O94966	6;6;6;6;6;5;5;5;5;2	6;6;6;6;6;5;5;5;5;2	6;6;6;6;6;5;5;5;5;2	25401000	0	0	Ubiquitin carboxyl-terminal hydrolase;Ubiquitin carboxyl-terminal hydrolase 19	USP19	;;;;;;;;	10	6	6	6	2	1	3	2	1	3	2	1	3	6.1	6.1	6.1	145.56	1321	1321;1358;1372;1384;1419;1089;1268;1281;1318;660	1	33	0	4.2529	2.1	1.4	2.8	37742000	14111000	9601800	19281000	1	0	0	7
E7ESW6;Q6ZQQ6;Q6ZQQ6-2	E7ESW6;Q6ZQQ6;Q6ZQQ6-2	4;4;4	4;4;4	4;4;4	0	0	625950000	WD repeat-containing protein 87	WDR87	;;	3	4	4	4	1	1	2	1	1	2	1	1	2	1.8	1.8	1.8	337.8	2912	2912;2873;2912	1	16	0.0071926	1.8852	0.4	0.4	0.9	67156000	82285000	65450000	647250000	0	0	1	4
E7ESZ7;O95299;Q8WXC9;C9J6X0;H7C2W5;H7C1Y7;H7C2X4;Q8N1B9	E7ESZ7;O95299;Q8WXC9;C9J6X0	5;5;5;3;2;2;2;2	5;5;5;3;2;2;2;2	5;5;5;3;2;2;2;2	55459000	91759000	61044000	NADH dehydrogenase [ubiquinone] 1 alpha subcomplex subunit 10, mitochondrial	NDUFA10	;;;	8	5	5	5	4	2	3	4	2	3	4	2	3	21	21	21	44.738	390	390;355;429;244;129;133;138;201	1	34	0	22.919	18.7	9.5	13.1	52147000	105220000	58745000	74832000	4	1	2	17
E7ET49;Q8NCG7-2;Q8NCG7-4;Q8NCG7;B4DVJ1;E7EVQ4	E7ET49;Q8NCG7-2;Q8NCG7-4;Q8NCG7	5;5;5;5;2;2	5;5;5;5;2;2	5;5;5;5;2;2	36057000	35510000	35997000	Sn1-specific diacylglycerol lipase beta	DAGLB	;;;	6	5	5	5	3	3	3	3	3	3	3	3	3	11.4	11.4	11.4	68.951	631	631;391;543;672;220;379	1	43	0	8.7351	6.8	6.8	5.7	20459000	41302000	38447000	27462000	2	1	2	21
E7ETB3;Q9ULA0;E7EPX3;B9ZVU2;F8WAN0;C9JBE1;E7EMB6;E5RJ35;C9JRG3;C9J1E2	E7ETB3;Q9ULA0;E7EPX3;B9ZVU2;F8WAN0;C9JBE1;E7EMB6	5;5;4;4;4;4;3;2;2;2	5;5;4;4;4;4;3;2;2;2	5;5;4;4;4;4;3;2;2;2	65122000	78938000	65028000	Aspartyl aminopeptidase	DNPEP	;;;;;;	10	5	5	5	3	3	5	3	3	5	3	3	5	12.6	12.6	12.6	54.53	493	493;475;224;270;273;331;410;89;117;137	1	49	0	9.8983	8.1	8.1	12.6	71325000	81483000	93886000	99186000	3	1	3	18
E7ETK0;P62847-2;P62847-3;P62847;P62847-4	E7ETK0;P62847-2;P62847-3;P62847;P62847-4	6;6;6;6;6	6;6;6;6;6	6;6;6;6;6	1887900000	2167500000	2176200000	40S ribosomal protein S24	RPS24	;;;;	5	6	6	6	5	6	6	5	6	6	5	6	6	41.2	41.2	41.2	15.197	131	131;130;132;133;289	1	153	0	43.261	35.9	41.2	41.2	1946300000	2085300000	2274600000	2284600000	12	9	13	138
E7ETU5;B4DN88;P29558-2;P29558;E7EPF2;C9J9B2;J3QT21;C9JIJ9;Q6XE24-3;Q6XE24-4;Q6XE24-5;Q6XE24-2;Q6XE24	E7ETU5;B4DN88;P29558-2;P29558;E7EPF2	3;3;3;3;2;1;1;1;1;1;1;1;1	3;3;3;3;2;1;1;1;1;1;1;1;1	2;2;2;2;1;1;1;1;1;1;1;1;1	103580000	107180000	115620000	RNA-binding motif, single-stranded-interacting protein 1	RBMS1	;;;;	13	3	3	2	3	3	3	3	3	3	2	2	2	10.8	10.8	8.1	40.147	370	370;419;403;406;127;264;434;436;419;420;421;433;437	1	41	0	6.6767	10.8	10.8	10.8	106120000	113280000	112830000	127450000	2	1	1	19
E7ETY4;E9PC69;Q7KZI7-10;Q7KZI7-13;Q7KZI7-7;Q7KZI7-2;Q7KZI7-15;Q7KZI7-5;Q7KZI7-16;Q7KZI7-4;Q7KZI7-9;Q7KZI7-12;Q7KZI7-14;Q7KZI7-3;Q7KZI7-6;Q7KZI7-11;Q7KZI7-8;Q7KZI7	E7ETY4;E9PC69;Q7KZI7-10;Q7KZI7-13;Q7KZI7-7;Q7KZI7-2;Q7KZI7-15;Q7KZI7-5;Q7KZI7-16;Q7KZI7-4;Q7KZI7-9;Q7KZI7-12;Q7KZI7-14;Q7KZI7-3;Q7KZI7-6;Q7KZI7-11;Q7KZI7-8;Q7KZI7	5;5;5;5;5;5;5;5;5;5;5;5;5;5;5;5;5;5	5;5;5;5;5;5;5;5;5;5;5;5;5;5;5;5;5;5	5;5;5;5;5;5;5;5;5;5;5;5;5;5;5;5;5;5	0	35816000	0	Serine/threonine-protein kinase MARK2	MARK2	;;;;;;;;;;;;;;;;;	18	5	5	5	4	3	3	4	3	3	4	3	3	9.7	9.7	9.7	78.452	699	699;778;686;691;692;701;709;719;724;725;734;740;745;746;755;773;779;788	1	37	0	6.8757	6.9	5.3	5.7	20378000	42055000	36880000	39098000	0	1	0	5
E7ETY7;Q8TED1	E7ETY7;Q8TED1	4;4	4;4	4;4	97618000	120400000	92372000	Glutathione peroxidase;Probable glutathione peroxidase 8	GPX8	;	2	4	4	4	4	4	4	4	4	4	4	4	4	29.1	29.1	29.1	18.09	158	158;209	1	60	0	6.1534	29.1	29.1	29.1	112020000	98399000	152620000	126770000	3	2	0	19
E7ETZ4;Q9Y6E2;B5MCH7;B5MCE7;Q75MG1;E7EMS9;E9PFD4;C9JF98;F8WDX8	E7ETZ4;Q9Y6E2;B5MCH7;B5MCE7;Q75MG1	17;17;14;11;11;7;6;6;6	16;16;13;10;11;7;6;6;6	16;16;13;10;11;7;6;6;6	899080000	845150000	836910000	Basic leucine zipper and W2 domain-containing protein 2	BZW2	;;;;	9	17	16	16	16	16	17	15	15	16	15	15	16	39.7	38	38	46.913	408	408;419;343;225;274;208;161;162;170	1	235	0	89.148	38	37.7	39.7	983580000	963980000	915140000	930580000	10	10	7	108
E7EU23;P50395;P50395-2;Q5SX87;V9GYF8;Q5SX90;Q5SX86;Q5SX91;V9GYJ7	E7EU23;P50395;P50395-2;Q5SX87	32;32;28;16;10;10;10;10;9	32;32;28;16;10;10;10;10;9	22;22;20;9;5;5;6;5;4	6653100000	6976900000	6930000000	Rab GDP dissociation inhibitor beta	GDI2	;;;	9	32	32	22	28	27	28	28	27	28	21	20	20	79.7	79.7	56.8	51.18	449	449;445;400;263;130;148;155;203;125	1	513	0	323.31	72.8	68.6	69	6523000000	7555800000	7523100000	7403400000	33	24	27	311
E7EU96;P68400;Q8NEV1;P68400-2;V9GYA2;V9GY80;V9GYW6	E7EU96;P68400;Q8NEV1;P68400-2	15;15;12;10;2;2;1	15;15;12;10;2;2;1	15;15;12;10;2;2;1	523320000	474180000	515640000	Casein kinase II subunit alpha;Casein kinase II subunit alpha 3	CSNK2A1;CSNK2A3	;;;	7	15	15	15	11	13	12	11	13	12	11	13	12	53.2	53.2	53.2	45.31	385	385;391;391;255;74;79;27	1	158	0	135.21	42.1	48.3	42.6	561120000	649090000	571000000	542990000	10	5	6	82
E7EUI7;E7EMN6;P41236;Q6NXS1	E7EUI7;E7EMN6;P41236;Q6NXS1	4;4;4;2	4;4;4;2	4;4;4;2	85104000	72127000	78577000	Protein phosphatase inhibitor 2;Protein phosphatase inhibitor 2-like protein 3	PPP1R2;PPP1R2P3	;;;	4	4	4	4	4	4	3	4	4	3	4	4	3	70	70	70	8.9811	80	80;170;205;205	1	42	0	7.886	70	70	58.8	49830000	86197000	94822000	72211000	2	2	2	24
E7EUM5;Q7Z3B4-3;Q7Z3B4;Q7Z3B4-2	E7EUM5;Q7Z3B4-3;Q7Z3B4;Q7Z3B4-2	8;8;8;7	8;8;8;7	8;8;8;7	77756000	76397000	73459000	Nucleoporin p54	NUP54	;;;	4	8	8	8	6	5	5	6	5	5	6	5	5	30	30	30	37.349	327	327;459;507;291	1	61	0	12.331	21.7	20.8	19	97510000	86213000	72943000	72285000	1	2	2	21
E7EVA0;P27816;P27816-6;P27816-2;B9ZVR1;P27816-5;E9PGM5;P27816-4;B5MEG9;H7C4C5;H0Y2V1;B4DSQ1;H7C456;P27816-7	E7EVA0;P27816;P27816-6;P27816-2;B9ZVR1;P27816-5	49;43;42;35;27;26;22;21;17;15;12;9;8;3	49;43;42;35;27;26;22;21;17;15;12;9;8;3	37;31;30;23;17;16;10;10;9;5;0;0;8;3	2444800000	2621800000	2648800000	Microtubule-associated protein;Microtubule-associated protein 4	MAP4	;;;;;	14	49	49	37	41	40	38	41	40	38	30	29	27	25.9	25.9	20.3	245.44	2297	2297;1152;1135;979;811;809;887;872;711;493;463;249;290;99	1	598	0	249.84	21.9	20.9	19.9	2515300000	2740500000	2824800000	2665600000	24	15	27	314
E7EVC7;Q676U5-3;Q676U5-2;Q676U5;Q676U5-5;C9J8C6;C9JAY7;C9J1B2;Q676U5-4	E7EVC7;Q676U5-3;Q676U5-2;Q676U5;Q676U5-5	6;6;6;6;4;1;1;1;1	6;6;6;6;4;1;1;1;1	6;6;6;6;4;1;1;1;1	36284000	0	0	Autophagy-related protein 16-1	ATG16L1	;;;;	9	6	6	6	3	2	2	3	2	2	3	2	2	18.3	18.3	18.3	70.01	624	624;470;588;607;444;55;164;187;428	1	29	0	11.098	7.7	5	5	14141000	34915000	18342000	22028000	1	0	0	10
E7EVD1;O43395;B4DSY9	E7EVD1;O43395	8;8;3	8;8;3	8;8;3	97919000	83116000	105980000	U4/U6 small nuclear ribonucleoprotein Prp3	PRPF3	;	3	8	8	8	5	5	6	5	5	6	5	5	6	18.9	18.9	18.9	72.075	634	634;683;281	1	65	0	15.072	13.9	8.5	10.4	101270000	94380000	96422000	124950000	2	2	1	25
E7EVL4;Q9H490-2;Q9H490	E7EVL4;Q9H490-2;Q9H490	2;2;2	2;2;2	2;2;2	69290000	0	0	Phosphatidylinositol glycan anchor biosynthesis class U protein	PIGU	;;	3	2	2	2	2	2	2	2	2	2	2	2	2	6.4	6.4	6.4	48.22	423	423;415;435	1	25	0	10.442	6.4	6.4	6.4	14819000	72622000	29283000	37363000	0	1	2	11
E7EVQ6;Q14534;H0YBN7;E5RJH9	E7EVQ6;Q14534	7;7;2;1	7;7;2;1	7;7;2;1	167690000	157110000	183430000	Squalene monooxygenase	SQLE	;	4	7	7	7	4	7	6	4	7	6	4	7	6	22.5	22.5	22.5	53.067	479	479;574;163;184	1	68	0	27.219	14.4	22.5	19.8	145240000	167280000	187330000	198680000	2	6	3	36
E7EVX8;Q8WWY3;Q8WWY3-2;E7ESA8;E7EU94;E7ESX0;E7EN72;Q8WWY3-3	E7EVX8;Q8WWY3;Q8WWY3-2;E7ESA8;E7EU94;E7ESX0;E7EN72	10;10;6;6;5;5;5;4	10;10;6;6;5;5;5;4	10;10;6;6;5;5;5;4	108870000	117560000	133990000	U4/U6 small nuclear ribonucleoprotein Prp31	PRPF31	;;;;;;	8	10	10	10	9	4	6	9	4	6	9	4	6	35.5	35.5	35.5	54.766	493	493;499;364;450;260;276;284;278	1	82	0	20.081	33.5	14.2	20.9	93999000	172510000	65368000	101380000	4	2	5	39
E7EW05;Q9NVU7;Q9NVU7-2	E7EW05;Q9NVU7;Q9NVU7-2	6;6;5	6;6;5	6;6;5	98081000	122110000	90669000	Protein SDA1 homolog	SDAD1	;;	3	6	6	6	4	3	3	4	3	3	4	3	3	9.1	9.1	9.1	75.44	650	650;687;590	1	54	0	5.9794	6.2	4.9	5.2	363960000	35653000	61527000	47263000	1	3	0	18
E7EW20;Q9UM54-5;Q9UM54-2;Q9UM54-6;Q9UM54-4;Q9UM54-1;Q9UM54	E7EW20;Q9UM54-5;Q9UM54-2;Q9UM54-6;Q9UM54-4;Q9UM54-1;Q9UM54	5;5;5;5;5;5;5	5;5;5;5;5;5;5	5;5;5;5;5;5;5	196360000	0	0	Unconventional myosin-VI	MYO6	;;;;;;	7	5	5	5	4	1	2	4	1	2	4	1	2	4.7	4.7	4.7	148.83	1286	1286;1253;1262;1285;1285;1285;1294	1	31	0	7.7861	3.9	0.9	2	48022000	399920000	31849000	50337000	4	0	0	11
E7EW69;B5ME97;Q9P0V9-3;Q9P0V9;Q9P0V9-2;E7EX04;B7Z371;B7Z277;C9JEQ7;F5H1W3;F8WC85;C9JEW2;C9JNR7;F5H1F2	E7EW69;B5ME97;Q9P0V9-3;Q9P0V9;Q9P0V9-2;E7EX04;B7Z371;B7Z277	13;13;13;13;13;12;8;7;2;1;1;1;1;1	12;12;12;12;12;11;7;6;2;1;1;1;1;1	12;12;12;12;12;11;7;6;2;1;1;1;1;1	439970000	436110000	446120000	Septin-10	10\Sep	;;;;;;;	14	13	12	12	10	10	10	9	9	9	9	9	9	42.2	38	38	52.145	450	450;544;431;454;503;473;321;283;97;38;48;57;61;98	1	151	0	116	33.8	36	32.9	372140000	512880000	377760000	465990000	5	7	7	78
E7EWK3;Q9H2U1-3;Q9H2U1;F5GZS0;Q9H2U1-2	E7EWK3;Q9H2U1-3;Q9H2U1;F5GZS0;Q9H2U1-2	9;9;9;8;8	9;9;9;8;8	8;8;8;7;7	85898000	87013000	120140000	ATP-dependent RNA helicase DHX36	DHX36	;;;;	5	9	9	8	7	6	5	7	6	5	7	6	5	17.3	17.3	16.2	91.43	797	797;979;1008;994;994	1	68	0	32.257	14.3	12	9.9	96751000	110580000	117440000	118230000	3	2	1	24
E7EX17;P23588;B4DS13;F8VX11;F8VSC7;F8VP89;F8W0K0;F8VYE9;F8VRU1	E7EX17;P23588;B4DS13;F8VX11	22;22;21;11;9;9;7;6;5	22;22;21;11;9;9;7;6;5	22;22;21;11;9;9;7;6;5	1021000000	1147000000	1270000000	Eukaryotic translation initiation factor 4B	EIF4B	;;;	9	22	22	22	18	20	19	18	20	19	18	20	19	39.9	39.9	39.9	69.697	616	616;611;572;360;227;275;169;185;175	1	278	0	136.38	32.6	39.3	37.2	1071100000	1096200000	1249000000	1266800000	13	8	8	130
E7EX90;Q14203-3;Q14203-4;Q14203-6;Q14203;Q14203-5;Q14203-2;Q6AWB1;E7EWF7;C9JZA4;C9JTE5;C9JJN7;C9JJD0;C9JKG6;E9PCY0;C9J1B7	E7EX90;Q14203-3;Q14203-4;Q14203-6;Q14203;Q14203-5;Q14203-2;Q6AWB1	29;29;29;29;29;27;27;16;9;2;2;2;2;2;2;1	29;29;29;29;29;27;27;16;9;2;2;2;2;2;2;1	29;29;29;29;29;27;27;16;9;2;2;2;2;2;2;1	571170000	619060000	599880000	Dynactin subunit 1	DCTN1;DKFZp686E0752	;;;;;;;	16	29	29	29	21	17	20	21	17	20	21	17	20	32.2	32.2	32.2	139.09	1256	1256;1236;1253;1271;1278;1139;1144;890;191;76;76;87;121;135;186;64	1	284	0	105.33	22.8	19.1	22	551940000	726940000	628860000	615670000	12	9	9	132
E9PAU2;Q8IY67-2;Q8IY67;K7EKR9;Q8IY67-3	E9PAU2;Q8IY67-2;Q8IY67	10;10;9;3;2	10;10;9;3;2	10;10;9;3;2	155460000	141780000	167910000	Ribonucleoprotein PTB-binding 1	RAVER1	;;	5	10	10	10	8	7	6	8	7	6	8	7	6	25.3	25.3	25.3	79.578	756	756;739;606;96;75	1	93	0	47.226	21.4	17.3	16	186900000	188300000	124160000	171390000	2	4	3	41
E9PAV3;F8VZJ2;H0YHX9;Q13765;E9PAV3-2;F8W1N5;F8VNW4;F8W0W4;F8VZ58;Q9BZK3	E9PAV3;F8VZJ2;H0YHX9;Q13765;E9PAV3-2;F8W1N5;F8VNW4;F8W0W4	6;5;5;5;5;4;4;4;2;1	6;5;5;5;5;4;4;4;2;1	6;5;5;5;5;4;4;4;2;1	2695700000	2713300000	2599700000	Nascent polypeptide-associated complex subunit alpha, muscle-specific form;Nascent polypeptide-associated complex subunit alpha	NACA	;;;;;;;	10	6	6	6	5	5	4	5	5	4	5	5	4	3.4	3.4	3.4	205.42	2078	2078;136;213;215;925;71;148;198;126;213	1	105	0	131.7	2.7	2.7	2.4	2499200000	2898200000	3144800000	2687100000	6	6	9	78
E9PC74;Q13144;C9JRD9	E9PC74;Q13144	8;8;1	8;8;1	8;8;1	72282000	80956000	66587000	Translation initiation factor eIF-2B subunit epsilon	EIF2B5	;	3	8	8	8	5	3	3	5	3	3	5	3	3	16	16	16	78.346	705	705;721;107	1	44	0	12.837	9.8	6.1	5.7	30391000	84219000	55689000	88718000	3	1	1	17
E9PD53;Q9NTJ3;Q9NTJ3-2;C9JR83;C9J578;C9JVD8;C9J9E4;C9JWF0;C9IYK2;C9JJ64;F8WCB7	E9PD53;Q9NTJ3;Q9NTJ3-2	34;34;31;12;5;4;4;2;2;2;1	34;34;31;12;5;4;4;2;2;2;1	34;34;31;12;5;4;4;2;2;2;1	709680000	733120000	772510000	Structural maintenance of chromosomes protein;Structural maintenance of chromosomes protein 4	SMC4	;;	11	34	34	34	26	22	21	26	22	21	26	22	21	31.3	31.3	31.3	144.45	1263	1263;1288;1230;423;139;119;157;170;173;180;50	1	315	0	172.17	23.5	20	18.2	640160000	910780000	743300000	643900000	16	12	9	133
E9PDM3;P31641;C9JPV1;F8WF95;P31641-2	E9PDM3;P31641;C9JPV1;F8WF95;P31641-2	2;2;1;1;1	2;2;1;1;1	2;2;1;1;1	47267000	45196000	0	Sodium- and chloride-dependent taurine transporter;Transporter	SLC6A6	;;;;	5	2	2	2	2	2	1	2	2	1	2	2	1	7.2	7.2	7.2	40.516	359	359;620;109;112;200	1	23	0	9.2191	7.2	7.2	2.5	47321000	48029000	48243000	24683000	1	1	0	11
E9PDN5;P11532-3;P11532-2;P11532-4;P11532;E7EQS5;F8VX32;E7ESB2;H0Y304;P11532-8;P11532-7;P11532-5;P11532-6;F5GZY3;E7EQR9;P11532-10;P11532-9;H0Y3E8	E9PDN5;P11532-3;P11532-2;P11532-4;P11532;E7EQS5;F8VX32;E7ESB2;H0Y304;P11532-8;P11532-7;P11532-5;P11532-6;F5GZY3;E7EQR9;P11532-10;P11532-9	5;5;5;5;5;4;4;4;4;4;4;4;4;3;3;3;3;2	5;5;5;5;5;4;4;4;4;4;4;4;4;3;3;3;3;2	5;5;5;5;5;4;4;4;4;4;4;4;4;3;3;3;3;2	75930000	75558000	66244000	Dystrophin	DMD	;;;;;;;;;;;;;;;;	18	5	5	5	4	4	4	4	4	4	4	4	4	1.6	1.6	1.6	426.02	3681	3681;2341;2344;3677;3685;1225;1230;1243;1386;604;617;622;635;1115;1133;507;525;238	1	47	0	12.017	1.4	1.4	1.4	81438000	99372000	89447000	72497000	2	1	3	27
E9PEM5;F5H1X8;P50851-2;P50851;H0YAC6;Q5T321;F5GXV7;Q8NFP9;H0Y9N9	E9PEM5;F5H1X8;P50851-2;P50851	20;20;20;19;8;2;2;2;1	20;20;20;19;8;2;2;2;1	20;20;20;19;8;2;2;2;1	186910000	130230000	106680000	Lipopolysaccharide-responsive and beige-like anchor protein	LRBA	;;;	9	20	20	20	11	14	12	11	14	12	11	14	12	9.4	9.4	9.4	286.97	2575	2575;2852;2851;2863;1505;2943;2946;2946;134	1	144	0	25.868	5.2	6.4	5	134680000	140510000	189350000	158290000	4	2	0	34
E9PEP6;O14786;Q5JWQ4;E7EX60;Q5T7F0;Q5JWQ6;O14786-3;O14786-2;Q5JWQ2	E9PEP6;O14786;Q5JWQ4;E7EX60;Q5T7F0;Q5JWQ6;O14786-3;O14786-2	4;4;3;3;3;3;3;3;1	4;4;3;3;3;3;3;3;1	4;4;3;3;3;3;3;3;1	30924000	0	40983000	Neuropilin-1	NRP1	;;;;;;;	9	4	4	4	3	3	2	3	3	2	3	3	2	6.1	6.1	6.1	101.3	906	906;923;597;641;704;735;609;644;105	1	32	0	8.2315	4.2	4.2	3	31614000	40271000	39405000	38812000	1	0	1	5
E9PES6;E7ES08;E7EQU1;O15347	E9PES6;E7ES08;E7EQU1;O15347	5;5;5;5	5;5;5;5	5;5;5;5	181690000	172460000	193090000	High mobility group protein B3	HMGB3	;;;	4	5	5	5	4	5	4	4	5	4	4	5	4	26.8	26.8	26.8	17.522	153	153;188;193;200	1	49	0	8.3469	26.1	26.8	26.1	178920000	207890000	209020000	189540000	1	2	2	20
E9PF18;Q16836;Q16836-3;Q16836-2	E9PF18;Q16836;Q16836-3;Q16836-2	12;12;12;12	12;12;12;12	12;12;12;12	960250000	795570000	825830000	Hydroxyacyl-coenzyme A dehydrogenase, mitochondrial	HADH	;;;	4	12	12	12	9	8	11	9	8	11	9	8	11	50.3	50.3	50.3	35.236	318	318;314;331;390	1	137	0	87.444	43.4	33	40.9	934300000	1025200000	805360000	825210000	7	5	6	76
E9PF19;Q9Y4P3;C9JVF0;F8WCR3;F8WDI9	E9PF19;Q9Y4P3;C9JVF0	12;12;6;2;2	12;12;6;2;2	12;12;6;2;2	220790000	194250000	249880000	Transducin beta-like protein 2	TBL2	;;	5	12	12	12	9	9	7	9	9	7	9	9	7	38	38	38	45.935	411	411;447;270;107;176	1	109	0	66.103	28.7	27.7	22.1	203990000	198810000	228190000	227460000	5	6	3	58
E9PFK9;E7ERJ8;Q9UJ41-2;Q9UJ41-4;Q9UJ41-3;Q9UJ41	E9PFK9;E7ERJ8;Q9UJ41-2;Q9UJ41-4;Q9UJ41-3;Q9UJ41	4;4;4;4;4;4	4;4;4;4;4;4	4;4;4;4;4;4	31883000	28386000	0	Rab5 GDP/GTP exchange factor	RABGEF1	;;;;;	6	4	4	4	2	4	1	2	4	1	2	4	1	10.9	10.9	10.9	58.394	504	504;531;491;505;531;708	1	23	0	6.0627	3.8	10.9	4.2	10564000	33342000	48269000	26973000	1	2	0	10
E9PFQ4;Q86SQ0-2;Q86SQ0-3;Q86SQ0;G5E9V3;E9PGF6;E9PDY7	E9PFQ4;Q86SQ0-2;Q86SQ0-3;Q86SQ0;G5E9V3;E9PGF6	4;4;4;4;2;2;1	4;4;4;4;2;2;1	4;4;4;4;2;2;1	0	0	45367000	Pleckstrin homology-like domain family B member 2	PHLDB2	;;;;;	7	4	4	4	1	2	3	1	2	3	1	2	3	5.4	5.4	5.4	125.47	1115	1115;1210;1237;1253;581;744;519	1	32	0	7.3495	1	2	4.3	19708000	20440000	29211000	54195000	0	0	1	10
E9PFR3;Q14738-3;Q14738-2;Q14738;H0Y8C4;H7C5Q9;H0YJ35;Q15173-2;Q15173	E9PFR3;Q14738-3;Q14738-2;Q14738;H0Y8C4	11;11;11;11;9;4;1;1;1	11;11;11;11;9;4;1;1;1	6;6;6;6;5;2;0;0;0	229580000	195750000	204620000	Serine/threonine-protein phosphatase 2A 56 kDa regulatory subunit delta isoform	PPP2R5D	;;;;	9	11	11	6	8	9	8	8	9	8	5	5	5	25.9	25.9	13.8	69.116	594	594;496;570;602;504;154;71;494;497	1	116	0	27.286	18.9	22.1	18	262580000	212690000	213820000	212850000	4	3	3	49
E9PFW3;Q96CW1-2;Q96CW1;C9JJ47;C9JTK4;C9JGT8;C9JJD3;C9JPV8;H7C4C3	E9PFW3;Q96CW1-2;Q96CW1;C9JJ47	20;20;20;12;9;9;8;8;3	20;20;20;12;9;9;8;8;3	20;20;20;12;9;9;8;8;3	932060000	1019600000	984820000	AP-2 complex subunit mu	AP2M1	;;;	9	20	20	20	16	17	17	16	17	17	16	17	17	50	50	50	52.303	460	460;433;435;252;160;195;113;136;122	1	286	0	139.95	41.5	42.4	42.4	1035700000	990100000	1044100000	1039500000	14	13	15	144
E9PG35;E9PHF7;Q96RQ3;F5GYT8;G5E9X5	E9PG35;E9PHF7;Q96RQ3;F5GYT8;G5E9X5	5;5;5;4;3	5;5;5;4;3	5;5;5;4;3	36590000	61097000	51987000	Methylcrotonoyl-CoA carboxylase subunit alpha, mitochondrial	MCCC1	;;;;	5	5	5	5	5	3	2	5	3	2	5	3	2	13.2	13.2	13.2	66.467	598	598;616;725;426;434	1	38	0	9.4439	13.2	8.9	4.8	44950000	56537000	58841000	42925000	1	1	1	11
E9PG39;E9PC15;Q53H12	E9PG39;E9PC15;Q53H12	4;4;4	4;4;4	4;4;4	127850000	80531000	85237000	Acylglycerol kinase, mitochondrial	AGK	;;	3	4	4	4	4	3	4	4	3	4	4	3	4	23.8	23.8	23.8	26.925	244	244;394;422	1	51	0	35.826	23.8	20.5	23.8	91401000	153940000	76258000	79297000	3	1	1	18
E9PG40;P05067-7;P05067-11;P05067-8;P05067-9;P05067;H7C104;H7C0V9;E9PEV0;P05067-10;P05067-3;P05067-4;P05067-5;P05067-6;H7C2L2	E9PG40;P05067-7;P05067-11;P05067-8;P05067-9;P05067;H7C104;H7C0V9;E9PEV0;P05067-10;P05067-3;P05067-4;P05067-5;P05067-6	5;5;5;5;5;5;4;4;4;4;4;4;4;4;1	5;5;5;5;5;5;4;4;4;4;4;4;4;4;1	5;5;5;5;5;5;4;4;4;4;4;4;4;4;1	42698000	54030000	0	Amyloid beta A4 protein;N-APP;Soluble APP-alpha;Soluble APP-beta;C99;Beta-amyloid protein 42;Beta-amyloid protein 40;C83;P3(42);P3(40);C80;Gamma-secretase C-terminal fragment 59;Gamma-secretase C-terminal fragment 57;Gamma-secretase C-terminal fragment 50;C31	APP	;;;;;;;;;;;;;	15	5	5	5	4	3	3	4	3	3	4	3	3	8	8	8	80.832	714	714;733;746;751;752;770;280;485;660;639;677;695;696;714;181	1	53	0	7.3811	6.2	4.9	3.8	49515000	50525000	45096000	77957000	2	2	0	16
E9PG46;Q2M2I8-2;Q2M2I8;K4DI97;Q9NSY1-2;Q9NSY1-3;Q9NSY1	E9PG46;Q2M2I8-2;Q2M2I8	3;3;3;1;1;1;1	3;3;3;1;1;1;1	3;3;3;1;1;1;1	11344000	0	0	AP2-associated protein kinase 1	AAK1	;;	7	3	3	3	2	1	1	2	1	1	2	1	1	7	7	7	73.769	674	674;863;961;355;662;677;1161	1	16	0	6.9852	4.7	1.8	2.2	6106900	12351000	3014300	10818000	2	0	0	2
E9PGC0;P20936-2;B4DTL2;P20936;Q68CU6	E9PGC0;P20936-2;B4DTL2;P20936	4;4;4;4;1	4;4;4;4;1	4;4;4;4;1	19326000	17577000	0	Ras GTPase-activating protein 1	RASA1	;;;	5	4	4	4	3	2	2	3	2	2	3	2	2	5.3	5.3	5.3	101.79	881	881;870;880;1047;539	1	28	0	4.8972	3.9	2.3	2.3	18117000	22564000	10173000	11447000	1	1	0	9
E9PGT3;Q15418-3;E9PRI4;Q15418;Q15418-2;B7Z3B5;F2Z2J1;Q15349;Q15349-3;Q15349-2;E9PMM7;Q5SVM7;Q5SVM6;E9PAN7	E9PGT3;Q15418-3;E9PRI4;Q15418;Q15418-2	14;14;14;14;14;4;4;4;4;4;3;3;3;2	10;10;10;10;10;1;1;1;1;1;1;2;3;1	10;10;10;10;10;1;1;1;1;1;1;2;3;1	177670000	170210000	132630000	Ribosomal protein S6 kinase;Ribosomal protein S6 kinase alpha-1	RPS6KA1	;;;;	14	14	10	10	10	12	12	7	9	8	7	9	8	24.9	18.9	18.9	81.471	724	724;643;719;735;744;644;758;733;741;758;112;115;166;204	1	99	0	21.786	18	21.3	22	151780000	160570000	221580000	174710000	3	4	5	37
E9PGT6;Q99627-2;Q99627;H7C3S9;B8ZZP3	E9PGT6;Q99627-2;Q99627;H7C3S9;B8ZZP3	5;5;5;4;4	5;5;5;4;4	5;5;5;4;4	199320000	235180000	243930000	COP9 signalosome complex subunit 8	COPS8	;;;;	5	5	5	5	5	5	5	5	5	5	5	5	5	42.2	42.2	42.2	19.344	173	173;160;209;83;206	1	60	0	80.939	42.2	42.2	42.2	204070000	251330000	330910000	246980000	3	4	3	34
E9PH64;E7EWZ0;E9PF49;Q9Y6M9	E9PH64;E7EWZ0;E9PF49;Q9Y6M9	3;3;3;3	3;3;3;3	3;3;3;3	54319000	57384000	59332000	NADH dehydrogenase [ubiquinone] 1 beta subcomplex subunit 9	NDUFB9	;;;	4	3	3	3	2	3	2	2	3	2	2	3	2	19	19	19	20.383	168	168;178;221;179	1	29	0	5.2292	13.7	19	13.7	49927000	48041000	65948000	61872000	1	1	1	13
E9PHA2;Q15003;C9J470;Q15003-2;C9JZP1;H7C415	E9PHA2;Q15003;C9J470;Q15003-2	16;16;14;12;6;2	16;16;14;12;6;2	16;16;14;12;6;2	163060000	125600000	196690000	Condensin complex subunit 2	NCAPH	;;;	6	16	16	16	11	10	8	11	10	8	11	10	8	30.3	30.3	30.3	81.572	730	730;741;607;605;216;182	1	122	0	26.419	22.3	17.1	15.3	235310000	219660000	137700000	163080000	3	3	2	47
E9PHH9;Q9BUI4	E9PHH9;Q9BUI4	1;1	1;1	1;1	27105000	23207000	23732000	DNA-directed RNA polymerase III subunit RPC3	POLR3C	;	2	1	1	1	1	1	1	1	1	1	1	1	1	4.1	4.1	4.1	46.189	411	411;534	1	25	0	13.245	4.1	4.1	4.1	14944000	29428000	24525000	24475000	2	2	2	23
E9PI68;Q15005;E9PL01;E9PRB9;H0YE04	E9PI68;Q15005;E9PL01;E9PRB9	10;10;9;5;3	10;10;9;5;3	10;10;9;5;3	937240000	986540000	994740000	Signal peptidase complex subunit 2	SPCS2	;;;	5	10	10	10	10	9	10	10	9	10	10	9	10	43.6	43.6	43.6	28.503	257	257;226;157;87;166	1	163	0	151.27	43.6	39.3	43.6	1034200000	1076900000	1130400000	1032000000	9	12	11	101
E9PIE3;Q969G5	E9PIE3;Q969G5	6;6	6;6	6;6	179480000	163700000	120910000	Protein kinase C delta-binding protein	PRKCDBP	;	2	6	6	6	5	5	5	5	5	5	5	5	5	21.5	21.5	21.5	31.088	293	293;261	1	77	0	31.726	18.4	18.1	18.1	87695000	214360000	170530000	167820000	2	3	1	35
E9PJ05;E9PR76;E9PSH4;Q9H063	E9PJ05;E9PR76;E9PSH4;Q9H063	1;1;1;1	1;1;1;1	1;1;1;1	0	0	18300000	Repressor of RNA polymerase III transcription MAF1 homolog	MAF1	;;;	4	1	1	1	0	0	1	0	0	1	0	0	1	37.1	37.1	37.1	7.6665	70	70;252;286;256	1	2	0.00051099	2.9166	0	0	37.1	0	0	0	18923000	0	0	1	2
E9PJ55;Q9NUJ3;R4GNF5;E9PP52;E9PMB0;E7EN41	E9PJ55;Q9NUJ3	3;3;1;1;1;1	3;3;1;1;1;1	3;3;1;1;1;1	24611000	23311000	20022000	T-complex protein 11-like protein 1	TCP11L1	;	6	3	3	3	3	2	2	3	2	2	3	2	2	6.6	6.6	6.6	67.238	595	595;509;106;144;154;374	1	28	0	12.224	6.6	4.9	4.9	22731000	33062000	22520000	19405000	2	1	1	17
E9PJ81;Q04323;Q04323-2;E9PRQ7;E9PS08	E9PJ81;Q04323;Q04323-2;E9PRQ7	9;9;9;8;1	9;9;9;8;1	9;9;9;8;1	583930000	589920000	561880000	UBX domain-containing protein 1	UBXN1	;;;	5	9	9	9	8	7	6	8	7	6	8	7	6	40	40	40	32.611	290	290;297;312;293;100	1	122	0	316.62	37.2	31.7	29.3	476150000	870980000	465170000	401150000	6	3	5	60
E9PJF0;E9PQW4;P27361-3;P27361;P27361-2;E9PBK7;B3KR49;H0YDH9;H0YEX6;E9PRH7;K7ELV1;K7EN18	E9PJF0;E9PQW4;P27361-3;P27361;P27361-2;E9PBK7;B3KR49	8;8;8;8;7;5;4;2;1;1;1;1	4;4;4;4;3;2;1;0;1;1;0;0	4;4;4;4;3;2;1;0;1;1;0;0	84428000	76967000	71944000	Mitogen-activated protein kinase;Mitogen-activated protein kinase 3	MAPK3	;;;;;;	12	8	4	4	6	7	6	3	3	3	3	3	3	34.5	19.9	19.9	35.737	316	316;339;357;379;335;311;265;87;121;136;233;281	1	49	0	17.534	27.2	27.2	26.3	81026000	92631000	52185000	101520000	2	1	2	14
E9PJK1;E9PRJ8;H0YDL9;H0YDJ9;E9PIF1;A6NMH8;P60033;E9PM31;H0YEE2	E9PJK1;E9PRJ8;H0YDL9;H0YDJ9;E9PIF1;A6NMH8;P60033;E9PM31;H0YEE2	2;2;2;2;2;2;2;1;1	2;2;2;2;2;2;2;1;1	2;2;2;2;2;2;2;1;1	109420000	157540000	128780000	Tetraspanin;CD81 antigen	CD81	;;;;;;;;	9	2	2	2	2	2	2	2	2	2	2	2	2	26.1	26.1	26.1	17.963	165	165;209;221;225;242;274;236;92;148	1	33	0	104.03	26.1	26.1	26.1	60085000	120340000	167390000	102750000	2	2	1	18
E9PK54	E9PK54	14	1	1	153700000	174200000	160410000		HSPA8		1	14	1	1	14	14	14	1	1	1	1	1	1	82	6.6	6.6	19.955	183	183	1	24	0.0042715	2.0935	82	82	82	148150000	153430000	186620000	153070000	1	1	0	9
E9PK67;E9PNI7;Q53GL7;E9PPE7;F8W8G7;E9PJI2;E9PPV8;E9PM86;E9PSE7;E9PIA6;E9PIK9	E9PK67;E9PNI7;Q53GL7;E9PPE7	12;12;12;8;3;2;2;1;1;1;1	12;12;12;8;3;2;2;1;1;1;1	12;12;12;8;3;2;2;1;1;1;1	163050000	147960000	161650000	Poly [ADP-ribose] polymerase 10	PARP10	;;;	11	12	12	12	7	10	9	7	10	9	7	10	9	19.1	19.1	19.1	109.1	1016	1016;1037;1025;764;339;172;178;128;135;144;146	1	115	0	27.045	11.2	17.4	15.7	170570000	148510000	180450000	208040000	1	3	2	32
E9PK91;Q9NYF8-3;Q9NYF8-2;Q9NYF8;E9PK09;E9PQN2;E9PKI6;Q9NYF8-4;E9PJA7;H0YF00;H0YF63;B0AZU3;H0YF14	E9PK91;Q9NYF8-3;Q9NYF8-2;Q9NYF8;E9PK09;E9PQN2;E9PKI6;Q9NYF8-4	13;13;13;13;12;12;12;8;6;2;1;1;1	13;13;13;13;12;12;12;8;6;2;1;1;1	13;13;13;13;12;12;12;8;6;2;1;1;1	452820000	340370000	368200000	Bcl-2-associated transcription factor 1	BCLAF1	;;;;;;;	13	13	13	13	7	10	8	7	10	8	7	10	8	17.7	17.7	17.7	100.4	871	871;869;918;920;725;750;752;747;467;118;126;138;187	1	149	0	23.339	10.2	14.7	12.5	288390000	485530000	408250000	320970000	7	6	3	77
E9PK95;P28702;P28702-3	E9PK95;P28702;P28702-3	5;5;5	5;5;5	1;1;1	40313000	49674000	45254000	Retinoic acid receptor RXR-beta	RXRB	;;	3	5	5	1	3	3	4	3	3	4	1	0	1	18.2	18.2	4.9	38.516	347	347;533;537	1	41	0	9.2815	11.5	10.7	14.1	22286000	43058000	46130000	52144000	0	1	2	10
E9PKG1;H7C2I1;Q99873-3;Q99873-2;Q99873-4;Q99873;E9PIX6;E9PQ98;H0YDE4;E9PNR9;E9PMW9;E9PI83;Q9NR22-2;Q9NR22;E9PMZ2	E9PKG1;H7C2I1;Q99873-3;Q99873-2;Q99873-4;Q99873;E9PIX6;E9PQ98;H0YDE4;E9PNR9	20;20;20;20;20;20;14;13;11;10;5;5;3;3;2	20;20;20;20;20;20;14;13;11;10;5;5;3;3;2	20;20;20;20;20;20;14;13;11;10;5;5;3;3;2	1276500000	1363900000	1449900000	Protein arginine N-methyltransferase 1	PRMT1	;;;;;;;;;	15	20	20	20	18	19	19	18	19	19	18	19	19	68	68	68	37.709	325	325;371;343;347;353;361;209;205;238;160;110;113;385;394;63	1	314	0	97.697	63.4	63.4	63.4	1568800000	1386200000	1516500000	1577800000	17	17	25	220
E9PKH6;E9PPW7;O00217;E9PN51;F8W9K7;H0YDT4	E9PKH6;E9PPW7;O00217;E9PN51;F8W9K7	5;5;5;4;4;1	5;5;5;4;4;1	5;5;5;4;4;1	50112000	60659000	80057000	NADH dehydrogenase [ubiquinone] iron-sulfur protein 8, mitochondrial	NDUFS8	;;;;	6	5	5	5	2	3	4	2	3	4	2	3	4	41.3	41.3	41.3	15.892	138	138;184;210;110;124;93	1	39	0	13.213	12.3	20.3	33.3	67220000	38301000	66600000	78138000	1	3	3	20
E9PKP7;P17480-2;P17480;E9PMM2;H0YDH7	E9PKP7;P17480-2;P17480;E9PMM2	6;6;6;3;1	6;6;6;3;1	6;6;6;3;1	117590000	106700000	105620000	Nucleolar transcription factor 1	UBTF	;;;	5	6	6	6	5	4	6	5	4	6	5	4	6	8.6	8.6	8.6	87.435	745	745;727;764;149;36	1	67	0	14.176	7.7	6.6	8.6	111790000	116740000	125790000	133050000	2	0	2	21
E9PKS9;E9PQE8;E9PN70;B4DME1;Q9Y296;G3V1A0;G5EA23;J3KP27	E9PKS9;E9PQE8;E9PN70;B4DME1;Q9Y296	3;3;3;3;3;1;1;1	3;3;3;3;3;1;1;1	3;3;3;3;3;1;1;1	32656000	28561000	0	Trafficking protein particle complex subunit 4	TRAPPC4	;;;;	8	3	3	3	2	2	1	2	2	1	2	2	1	28.6	28.6	28.6	14.15	126	126;176;257;165;219;117;126;181	1	29	0.00025927	3.145	17.5	17.5	8.7	31477000	42632000	32366000	28966000	0	0	0	4
E9PL10;Q96K17;Q96K17-2	E9PL10;Q96K17;Q96K17-2	6;6;4	6;6;4	6;6;4	356030000	298300000	298700000	Transcription factor BTF3;Transcription factor BTF3 homolog 4	BTF3L4	;;	3	6	6	6	4	5	6	4	5	6	4	5	6	37.9	37.9	37.9	15.779	145	145;158;100	1	81	0	41.646	37.9	37.9	37.9	304360000	373770000	357650000	353210000	1	1	3	28
E9PLK3;P55786;B7Z463;E5RJ24;E7EWZ2;I3L083;A6NEC2;F5GZY4;H0YAQ6;H0YDG0;E9PP11;A6NEC2-2;E9PJ74;H0YCQ5;E9PJY4;E9PPD4;E9PRQ5;A6NEC2-3;E9PJF9;E9PPZ2;E9PI82	E9PLK3;P55786;B7Z463	45;45;41;15;15;15;15;12;11;8;8;8;5;4;4;4;4;3;2;2;1	45;45;41;15;15;15;15;12;11;8;8;8;5;4;4;4;4;3;2;2;1	45;45;41;15;15;15;15;12;11;8;8;8;5;4;4;4;4;3;2;2;1	3507100000	3217400000	3409900000	Puromycin-sensitive aminopeptidase	NPEPPS	;;	21	45	45	45	42	38	37	42	38	37	42	38	37	62.4	62.4	62.4	102.99	915	915;919;839;471;477;478;478;324;431;169;201;263;158;65;141;163;172;163;134;178;127	1	642	0	323.31	56.1	51.3	49.5	3327300000	3920200000	3499600000	3533100000	33	28	26	363
E9PM04;Q9BTE7;H0YCN4;H0Y9C5;E9PLH8;E9PM78;H0YD80;E9PLS2;E9PQV9;H0Y907;B4DH26;Q92564-2;Q92564;Q92564-3	E9PM04;Q9BTE7;H0YCN4	5;5;3;1;1;1;1;1;1;1;1;1;1;1	5;5;3;1;1;1;1;1;1;1;1;1;1;1	5;5;3;1;1;1;1;1;1;1;1;1;1;1	245900000	204020000	34836000	DCN1-like protein;DCN1-like protein 5	DCUN1D5	;;	14	5	5	5	4	2	3	4	2	3	4	2	3	34.2	34.2	34.2	17.855	152	152;237;195;21;30;67;68;71;84;116;232;257;292;336	1	42	0	9.3844	27.6	10.5	20.4	49061000	407730000	29965000	34582000	3	1	1	17
E9PM46;Q96K76-2;Q96K76;Q96K76-3	E9PM46;Q96K76-2;Q96K76	20;19;19;1	20;19;19;1	20;19;19;1	231190000	241780000	289510000	Ubiquitin carboxyl-terminal hydrolase 47	USP47	;;	4	20	20	20	12	13	10	12	13	10	12	13	10	19.3	19.3	19.3	154.7	1355	1355;1287;1375;157	1	155	0	45.386	12	13.6	10.2	266870000	265690000	276680000	290750000	7	3	4	49
E9PM92;O00193;E9PRZ9;E3W975;E9PQA1	E9PM92;O00193;E9PRZ9;E3W975	4;4;3;3;1	4;4;3;3;1	4;4;3;3;1	292220000	308400000	265050000	Small acidic protein	C11orf58;SMAP	;;;	5	4	4	4	3	3	4	3	3	4	3	3	4	30.1	30.1	30.1	17.506	156	156;183;90;139;86	1	73	0	12.819	29.5	25.6	30.1	364030000	339470000	215110000	355840000	3	4	4	41
E9PMG1;H0YDT0;Q96D71-2;Q96D71-4;Q96D71-3;Q96D71;H0YE89;H0YCR2	E9PMG1;H0YDT0;Q96D71-2;Q96D71-4;Q96D71-3;Q96D71;H0YE89;H0YCR2	2;2;2;2;2;2;1;1	2;2;2;2;2;2;1;1	2;2;2;2;2;2;1;1	12074000	0	0	RalBP1-associated Eps domain-containing protein 1	REPS1	;;;;;;;	8	2	2	2	2	1	1	2	1	1	2	1	1	4.3	4.3	4.3	80.435	737	737;754;705;769;795;796;61;152	1	17	0.00026399	3.3729	4.3	2.2	2.2	24934000	13146000	6594800	12504000	0	0	1	4
E9PMI6;J3KN38;P54105	E9PMI6;J3KN38;P54105	2;2;2	2;2;2	2;2;2	0	29129000	0	Methylosome subunit pICln	CLNS1A	;;	3	2	2	2	1	1	2	1	1	2	1	1	2	29.9	29.9	29.9	18.259	167	167;203;237	1	21	0	8.6562	11.4	11.4	29.9	18741000	53972000	26776000	53599000	0	2	1	7
E9PMM3;Q9Y5Y5;Q9Y5Y5-2;E9PMS3;E9PQW0;E9PLS4;E9PP98	E9PMM3;Q9Y5Y5;Q9Y5Y5-2;E9PMS3;E9PQW0;E9PLS4;E9PP98	2;2;2;1;1;1;1	2;2;2;1;1;1;1	2;2;2;1;1;1;1	0	37385000	46076000	Peroxisomal membrane protein PEX16	PEX16	;;;;;;	7	2	2	2	1	2	1	1	2	1	1	2	1	13.1	13.1	13.1	21.165	183	183;336;346;52;60;160;241	1	25	0.00025694	2.9914	7.1	13.1	6	27807000	27225000	37283000	34513000	0	0	0	10
E9PMR4;P48509;E9PRJ3	E9PMR4;P48509;E9PRJ3	4;4;3	4;4;3	4;4;3	410650000	453700000	440740000	Tetraspanin;CD151 antigen	CD151	;;	3	4	4	4	4	4	3	4	4	3	4	4	3	13.9	13.9	13.9	28.067	251	251;253;178	1	42	0	7.6754	13.9	13.9	10	636940000	480130000	514020000	430080000	0	0	2	15
E9PMS6;Q8WWI1-3;F8WD26;J3KP06;Q8WWI1-4;Q8WWI1-2;Q8WWI1;E9PMT2;E9PLH4;E9PMP7;H0Y424;E9PLU6;E9PK58;E9PJ10;H0YDQ3;H0YDG6;H0YE95	E9PMS6;Q8WWI1-3;F8WD26;J3KP06;Q8WWI1-4;Q8WWI1-2;Q8WWI1;E9PMT2;E9PLH4;E9PMP7;H0Y424	15;15;14;14;14;14;14;13;13;10;8;2;2;2;2;2;1	15;15;14;14;14;14;14;13;13;10;8;2;2;2;2;2;1	15;15;14;14;14;14;14;13;13;10;8;2;2;2;2;2;1	220410000	215000000	184310000	LIM domain only protein 7	LMO7	;;;;;;;;;;	17	15	15	15	9	8	9	9	8	9	9	8	9	14	14	14	145.42	1275	1275;1349;1614;1670;1614;1670;1683;1398;1385;1045;1055;121;165;191;292;305;179	1	125	0	23.601	8.2	7.4	8.2	184060000	222610000	172990000	178170000	3	5	3	52
E9PN41;A8MVV6;J3KQ42;O14817;E9PSH3;E9PPX8;J3KNL1	E9PN41;A8MVV6;J3KQ42;O14817;E9PSH3;E9PPX8	3;3;3;3;2;2;1	3;3;3;3;2;2;1	3;3;3;3;2;2;1	82040000	71148000	111210000	Tetraspanin;Tetraspanin-4	TSPAN4	;;;;;	7	3	3	3	2	3	2	2	3	2	2	3	2	30.3	30.3	30.3	15.195	132	132;174;257;238;100;159;204	1	32	0	33.086	25	30.3	24.2	25658000	70540000	103520000	103390000	1	2	1	20
E9PNA6;Q13488;E9PM12;E9PMC5;H0YCE3;Q13488-2	E9PNA6;Q13488;E9PM12;E9PMC5;H0YCE3	4;4;3;2;2;1	4;4;3;2;2;1	4;4;3;2;2;1	21192000	0	0	V-type proton ATPase subunit a;V-type proton ATPase 116 kDa subunit a isoform 3	TCIRG1	;;;;	6	4	4	4	2	1	0	2	1	0	2	1	0	21.4	21.4	21.4	33.777	299	299;830;217;174;290;614	1	22	0	5.0009	13.7	6	0	43123000	14222000	4445200	0	0	0	0	7
E9PNK6;E9PPQ1;J3KNE7;Q16890-5;Q16890;Q16890-4;Q16890-3;Q16890-2;E9PNQ9	E9PNK6;E9PPQ1;J3KNE7;Q16890-5;Q16890;Q16890-4;Q16890-3;Q16890-2;E9PNQ9	7;7;7;7;7;6;6;6;5	7;7;7;7;7;6;6;6;5	7;7;7;7;7;6;6;6;5	499490000	545030000	568540000	Tumor protein D53	TPD52L1	;;;;;;;;	9	7	7	7	7	6	7	7	6	7	7	6	7	42.8	42.8	42.8	18.661	166	166;191;209;175;204;102;131;144;92	1	122	0	36.66	42.8	36.7	42.8	558160000	523270000	530070000	604630000	7	7	4	69
E9PNP3;Q9H7C9;E9PJP1;E9PLK9;K4DI89;E9PR47;Q9H7C9-3;Q9H7C9-2	E9PNP3;Q9H7C9;E9PJP1;E9PLK9;K4DI89;E9PR47;Q9H7C9-3;Q9H7C9-2	2;2;1;1;1;1;1;1	2;2;1;1;1;1;1;1	2;2;1;1;1;1;1;1	42076000	45574000	50121000	Mth938 domain-containing protein	AAMDC	;;;;;;;	8	2	2	2	2	2	2	2	2	2	2	2	2	18.4	18.4	18.4	15.588	141	141;122;93;137;147;168;88;118	1	30	0	5.2495	18.4	18.4	18.4	59224000	51507000	48546000	36368000	2	1	1	15
E9PNW4;E9PR17;P13987;H0YET2	E9PNW4;E9PR17;P13987;H0YET2	4;4;4;2	4;4;4;2	4;4;4;2	1078400000	1448200000	1086500000	CD59 glycoprotein	CD59	;;;	4	4	4	4	4	4	4	4	4	4	4	4	4	29.6	29.6	29.6	11.985	108	108;130;128;52	1	71	0	14.317	29.6	29.6	29.6	1434900000	1229300000	1485700000	1147500000	5	5	3	49
E9PQ57;P78406;E9PPG9;B0QZ36;B0QZ37	E9PQ57;P78406;E9PPG9;B0QZ36	7;7;6;4;2	7;7;6;4;2	7;7;6;4;2	126640000	172680000	140710000	mRNA export factor	RAE1	;;;	5	7	7	7	7	5	7	7	5	7	7	5	7	27.9	27.9	27.9	47.831	437	437;368;217;137;87	1	65	0	30.523	27.9	22	27.9	159940000	202100000	145170000	214320000	1	2	2	18
E9PQD0;E9PS30;E9PLI6;E9PS76;Q8N9N8	E9PQD0;E9PS30;E9PLI6;E9PS76;Q8N9N8	2;2;2;2;2	2;2;2;2;2	2;2;2;2;2	88528000	64104000	66772000	Probable RNA-binding protein EIF1AD	EIF1AD	;;;;	5	2	2	2	2	1	2	2	1	2	2	1	2	51.6	51.6	51.6	7.3314	64	64;78;113;114;165	1	29	0	22.149	51.6	26.6	51.6	62779000	111590000	38242000	62626000	2	0	0	14
E9PQM0;Q8WUK0-2;Q8WUK0-3;Q8WUK0	E9PQM0;Q8WUK0-2;Q8WUK0-3;Q8WUK0	2;2;2;2	2;2;2;2	2;2;2;2	15505000	21383000	20608000	Phosphatidylglycerophosphatase and protein-tyrosine phosphatase 1	PTPMT1	;;;	4	2	2	2	2	2	2	2	2	2	2	2	2	14.9	14.9	14.9	18.215	168	168;137;151;201	1	25	0	10.424	14.9	14.9	14.9	8557400	17815000	24334000	20326000	2	0	1	8
E9PQY2;Q9NQP4	E9PQY2;Q9NQP4	2;2	2;2	2;2	108630000	102530000	88089000	Prefoldin subunit 4	PFDN4	;	2	2	2	2	2	2	2	2	2	2	2	2	2	16.9	16.9	16.9	15.598	136	136;134	1	35	0	26.442	16.9	16.9	16.9	110390000	116510000	134150000	108370000	3	0	1	12
E9PQY3;P11117;E9PHY0;B7Z7D2;F5GWV7;E9PP23;G5EA28;E9PKW9;E9PQW9;B7Z6U3;P11117-2	E9PQY3;P11117;E9PHY0;B7Z7D2;F5GWV7;E9PP23	11;11;10;8;7;6;3;3;3;3;3	11;11;10;8;7;6;3;3;3;3;3	11;11;10;8;7;6;3;3;3;3;3	625710000	618470000	571340000	Lysosomal acid phosphatase	ACP2	;;;;;	11	11	11	11	9	10	10	9	10	10	9	10	10	29.9	29.9	29.9	45.306	395	395;423;360;391;236;305;122;151;160;162;160	1	143	0	49.205	23.5	26.6	26.6	531300000	655360000	678900000	637720000	6	5	6	85
E9PRM7;Q96BI1	E9PRM7;Q96BI1	2;2	2;2	2;2	48748000	53639000	52620000	Solute carrier family 22 member 18	SLC22A18	;	2	2	2	2	2	2	2	2	2	2	2	2	2	7.4	7.4	7.4	34.952	326	326;424	1	24	0	5.6217	7.4	7.4	7.4	41336000	56551000	59154000	51086000	1	1	1	8
E9PS17;E9PK59;Q96KG9-5;Q96KG9-3;Q96KG9-4;Q96KG9-6;Q96KG9-2;Q96KG9;E9PPN3;H0YCI6	E9PS17;E9PK59;Q96KG9-5;Q96KG9-3;Q96KG9-4;Q96KG9-6;Q96KG9-2;Q96KG9;E9PPN3	10;10;10;10;10;10;10;10;7;3	10;10;10;10;10;10;10;10;7;3	10;10;10;10;10;10;10;10;7;3	326980000	375620000	401200000	N-terminal kinase-like protein	SCYL1	;;;;;;;;	10	10	10	10	9	7	7	9	7	7	9	7	7	16.1	16.1	16.1	85.718	775	775;780;626;707;781;787;791;808;665;175	1	96	0	26.464	13.9	10.6	10.6	395190000	451250000	378590000	368230000	3	3	4	42
E9PS41;Q6RFH5;Q6RFH5-2;H0YFP2	E9PS41;Q6RFH5;Q6RFH5-2	3;3;2;1	3;3;2;1	3;3;2;1	0	0	11517000	WD repeat-containing protein 74	WDR74	;;	4	3	3	3	1	1	2	1	1	2	1	1	2	11	11	11	36.405	328	328;385;366;38	1	12	0	4.5485	3.4	3.4	7.6	0	7684900	4765600	11909000	1	0	1	9
E9PS74;Q8NBI5;E7EQD2;H0YD64	E9PS74;Q8NBI5;E7EQD2;H0YD64	3;3;3;2	3;3;3;2	3;3;3;2	57731000	68273000	56829000	Solute carrier family 43 member 3	SLC43A3	;;;	4	3	3	3	3	3	3	3	3	3	3	3	3	8.2	8.2	8.2	36.797	331	331;491;504;137	1	34	0	3.8744	8.2	8.2	8.2	69938000	68853000	81039000	33364000	1	0	2	15
E9PSH2;B1AP13;P08174-4;P08174;P08174-3;P08174-5;P08174-2;P08174-6;P08174-7;H3BLV0;B1AP15;H7BY55	E9PSH2;B1AP13;P08174-4;P08174;P08174-3;P08174-5;P08174-2;P08174-6;P08174-7;H3BLV0;B1AP15	19;19;19;19;19;19;19;19;19;18;10;6	19;19;19;19;19;19;19;19;19;18;10;6	19;19;19;19;19;19;19;19;19;18;10;6	5716700000	6028000000	5472800000	Complement decay-accelerating factor	CD55	;;;;;;;;;;	12	19	19	19	17	17	18	17	17	18	17	17	18	55.4	55.4	55.4	41.227	377	377;444;364;381;384;439;440;525;551;326;317;129	1	326	0	323.31	52.5	52.5	53.6	4675200000	6451500000	6933400000	4918100000	28	30	26	341
E9PSI1;E9PL78;E9PJM1;E9PMQ9;O15321-2;O15321;E9PQY7;E9PS99;G3V1B9;E9PNW2;E9PQI5;E9PJC4;E9PQ80;H0YI89	E9PSI1;E9PL78;E9PJM1;E9PMQ9;O15321-2;O15321;E9PQY7;E9PS99;G3V1B9	14;9;9;9;9;9;8;8;7;6;5;5;5;2	14;9;9;9;9;9;8;8;7;6;5;5;5;2	9;9;9;9;9;9;8;8;7;6;0;5;0;0	342450000	416970000	362680000	Transmembrane 9 superfamily member 1	TM9SF1	;;;;;;;;	14	14	14	9	11	13	10	11	13	10	8	9	7	20.2	20.2	12.5	92.386	815	815;300;420;589;489;606;242;257;519;207;166;210;213;61	1	170	0	119.02	17.8	19.3	14.7	311020000	408650000	489100000	352160000	7	7	7	94
F2Z2V0;B0QZ18;Q99829;E7ENH5;A6PVH9;Q5JX58;Q5JX59;Q5JX60;Q5JX44;Q5JX45;Q5JX56;Q5JX61;Q5JX52;Q5JX55;Q5JX54;Q5JX57;E7EV27;H0Y524	F2Z2V0;B0QZ18;Q99829;E7ENH5;A6PVH9;Q5JX58;Q5JX59;Q5JX60;Q5JX44;Q5JX45;Q5JX56;Q5JX61;Q5JX52	7;7;7;6;6;5;5;5;5;5;4;4;4;3;2;2;2;2	7;7;7;6;6;5;5;5;5;5;4;4;4;3;2;2;2;2	7;7;7;6;6;5;5;5;5;5;4;4;4;3;2;2;2;2	408650000	403010000	442040000	Copine-1	CPNE1	;;;;;;;;;;;;	18	7	7	7	6	6	7	6	6	7	6	6	7	12.6	12.6	12.6	58.634	533	533;542;537;427;481;201;209;231;304;386;174;213;305;152;136;137;138;208	1	104	0	15.368	10.9	11.3	12.6	365890000	428480000	396960000	558700000	6	1	5	52
F5GWH5;P61165	F5GWH5;P61165	1;1	1;1	1;1	0	98214000	108310000	Transmembrane protein 258	TMEM258	;	2	1	1	1	1	1	1	1	1	1	1	1	1	16.3	16.3	16.3	5.7065	49	49;79	1	30	0.00938	1.7356	16.3	16.3	16.3	99283000	102040000	115660000	122110000	2	0	2	17
F5GWJ1;O60245;O60245-2;H0YAH0	F5GWJ1;O60245;O60245-2;H0YAH0	13;13;13;7	13;13;13;7	13;13;13;7	320320000	303270000	304220000	Protocadherin-7	PCDH7	;;;	4	13	13	13	9	8	11	9	8	11	9	8	11	15	15	15	136.57	1255	1255;1069;1072;937	1	111	0	62.052	9.7	7.9	11.8	259440000	347270000	295400000	343330000	6	6	6	55
F5GWP8;C9JK18;C9JKY1;C9JTX4;C9J826;C9JPI2;K7ERP3	F5GWP8	40;13;13;12;12;3;3	40;13;13;12;12;3;3	0;0;0;0;0;0;0	7883400000	8945400000	8661300000		KRT17		7	40	40	0	36	37	36	36	37	36	0	0	0	73.3	73.3	0	66.35	591	591;295;297;235;276;86;104	1	813	0	323.31	69	67.7	65.5	8138700000	8223000000	9419900000	8212500000	44	41	46	511
F5GWS3;Q6P9B6;H3BM75;H3BUB0	F5GWS3;Q6P9B6	5;5;2;1	5;5;2;1	5;5;2;1	56354000	51795000	62176000	TLD domain-containing protein 1	TLDC1	;	4	5	5	5	2	2	3	2	2	3	2	2	3	18.2	18.2	18.2	48.035	429	429;456;193;148	1	44	0	10.515	8.4	7.5	12.1	59298000	47942000	51585000	71500000	1	1	1	10
F5GWT4;F5H2M7;Q9H4A3-2;Q9H4A3;Q9H4A3-5;Q9H4A3-6;Q9H4A3-7;Q9H4A3-4;F6UYG0;K7ENT7;Q96J92-2;Q96J92-3;Q96J92	F5GWT4;F5H2M7;Q9H4A3-2;Q9H4A3;Q9H4A3-5;Q9H4A3-6;Q9H4A3-7	17;17;17;17;17;17;17;8;7;1;1;1;1	17;17;17;17;17;17;17;8;7;1;1;1;1	15;15;15;15;15;15;15;8;5;1;1;1;1	269050000	239110000	280410000	Serine/threonine-protein kinase WNK1	WNK1	;;;;;;	13	17	17	15	11	11	11	11	11	11	10	11	10	9.7	9.7	8.7	225.5	2134	2134;2880;2135;2382;2634;2642;2833;1975;393;469;663;1165;1243	1	147	0	39.496	6.8	6.6	6.4	262920000	258050000	274890000	260220000	8	3	7	69
F5GWX5;Q14839;Q14839-2;Q8TDI0;Q12873-2;Q12873;Q12873-3;K7EMY3;Q5TG85;F5H6N4;F2Z2R5;K7EPV1;K7ESA5;I3L229;H7C3H7;H7C0J3	F5GWX5;Q14839;Q14839-2	44;44;44;9;9;9;9;7;6;3;3;1;1;1;1;1	44;44;44;9;9;9;9;7;6;3;3;1;1;1;1;1	44;44;44;9;9;9;9;7;6;3;3;1;1;1;1;1	693700000	689160000	680700000	Chromodomain-helicase-DNA-binding protein 4	CHD4	;;	16	44	44	44	30	25	23	30	25	23	30	25	23	32.4	32.4	32.4	217.1	1905	1905;1912;1940;1954;1966;2000;2059;1060;808;354;1225;63;127;249;277;383	1	392	0	173.05	20.9	17.1	16.7	643560000	701520000	657100000	539010000	10	8	11	151
F5GWY5;O00592-2;O00592;F5H7A2	F5GWY5;O00592-2;O00592;F5H7A2	8;8;8;7	8;8;8;7	8;8;8;7	1117800000	1147700000	1028000000	Podocalyxin	PODXL	;;;	4	8	8	8	7	7	5	7	7	5	7	7	5	18.4	18.4	18.4	58.865	560	560;526;558;526	1	94	0	82.627	13	18.4	9.1	1146900000	1367600000	1217000000	1154600000	4	6	4	60
F5GXF0;P22736;P22736-2	F5GXF0;P22736;P22736-2	3;3;3	3;3;3	3;3;3	32406000	0	0	Nuclear receptor subfamily 4 group A member 1	NR4A1	;;	3	3	3	3	3	1	1	3	1	1	3	1	1	5.4	5.4	5.4	70.451	652	652;598;611	1	26	0	4.9455	5.4	1.7	1.7	10177000	40617000	10991000	10723000	3	1	0	11
F5GXX5;P61803;F5H895	F5GXX5;P61803;F5H895	4;4;2	4;4;2	4;4;2	648210000	721840000	744030000	Dolichyl-diphosphooligosaccharide--protein glycosyltransferase subunit DAD1	DAD1	;;	3	4	4	4	4	4	3	4	4	3	4	4	3	47.1	47.1	47.1	9.5541	85	85;113;65	1	62	0	20.115	47.1	47.1	37.6	836430000	749100000	725930000	744020000	3	2	2	33
F5GYC1;E7EUE1;P28288;P28288-2;P28288-3	F5GYC1;E7EUE1;P28288;P28288-2	13;13;13;8;2	13;13;13;8;2	13;13;13;8;2	219150000	179000000	198220000	ATP-binding cassette sub-family D member 3	ABCD3	;;;	5	13	13	13	9	8	10	9	8	10	9	8	10	24.2	24.2	24.2	67.315	586	586;683;659;549;236	1	130	0	55.948	17.1	15	17.4	237630000	230790000	137950000	230180000	7	6	4	68
F5GYC4;B4DG22;B7ZB17;P51812;B1AXG1;B1AXG2;Q9UK32;B7ZL90;D6R910;D6RHW7;D6RA62;Q5TI62;D6RE03	F5GYC4;B4DG22;B7ZB17;P51812	16;16;16;16;5;3;3;3;2;1;1;1;1	16;16;16;16;5;3;3;3;2;1;1;1;1	12;12;12;12;2;2;1;1;0;0;0;0;0	311520000	290740000	290530000	Ribosomal protein S6 kinase alpha-3	RPS6KA3	;;;	13	16	16	12	12	12	11	12	12	11	9	9	7	27.9	27.9	21.8	80.622	710	710;711;712;740;227;133;745;745;125;96;141;166;171	1	171	0	22.048	19.4	19.4	17.5	312890000	351300000	361730000	263270000	4	3	6	62
F5GYJ5;Q9NX18;F8W679;M0QYN2;F5GXW4;M0R060;F5H5T6;F5H8E2	F5GYJ5;Q9NX18;F8W679;M0QYN2;F5GXW4;M0R060;F5H5T6	4;4;2;2;2;2;2;1	4;4;2;2;2;2;2;1	4;4;2;2;2;2;2;1	0	78237000	98881000	Succinate dehydrogenase assembly factor 2, mitochondrial	SDHAF2	;;;;;;	8	4	4	4	1	2	3	1	2	3	1	2	3	31.2	31.2	31.2	18.388	154	154;166;129;133;133;141;163;88	1	32	0	11.333	5.2	20.1	25.3	122820000	37811000	63174000	93926000	0	0	2	12
F5GYK2;Q9NRL3;F8VYA6;M0R317;M0QZM0	F5GYK2;Q9NRL3;F8VYA6;M0R317	6;6;6;5;2	6;6;6;5;2	5;5;5;4;2	75547000	81346000	91000000	Striatin-4	STRN4	;;;	5	6	6	5	4	3	3	4	3	3	3	2	2	18.8	18.8	17.2	68.584	634	634;753;760;198;317	1	57	0	8.8047	14.5	5.7	5.7	92139000	73705000	93230000	111000000	4	1	3	29
F5GYQ1;P61421;J3QL14;R4GN72;H3BQB4;H3BSG7;H3BQJ1	F5GYQ1;P61421;J3QL14;R4GN72	7;7;5;5;2;2;1	7;7;5;5;2;2;1	7;7;5;5;2;2;1	156560000	167770000	173290000	V-type proton ATPase subunit d 1	ATP6V0D1	;;;	7	7	7	7	5	6	4	5	6	4	5	6	4	29.6	29.6	29.6	44.659	392	392;351;232;274;113;115;227	1	79	0	48.276	24.5	27.8	19.1	226630000	137460000	216330000	107710000	3	5	3	43
F5GZP8;Q5JVZ5;B4DRL5;Q7Z5G9;Q96JJ3;B4DZ20;Q5JW01;H0YCM7;Q5JVZ8;Q5JVZ4	F5GZP8;Q5JVZ5;B4DRL5;Q7Z5G9;Q96JJ3;B4DZ20;Q5JW01;H0YCM7	5;5;5;5;5;4;3;3;2;1	5;5;5;5;5;4;3;3;2;1	5;5;5;5;5;4;3;3;2;1	37977000	36880000	0	Engulfment and cell motility protein 2	ELMO2	;;;;;;;	10	5	5	5	3	3	1	3	3	1	3	3	1	14.5	14.5	14.5	62.135	537	537;718;732;632;720;452;283;441;267;338	1	33	0	20.23	9.3	7.6	4.3	36860000	39402000	42726000	28460000	2	1	0	13
F5GZS6;P08195;J3KPF3;P08195-3;P08195-4;H0YFS2;F5GZI0;H0YFX4	F5GZS6;P08195;J3KPF3;P08195-3;P08195-4	33;33;32;32;32;11;8;4	33;33;32;32;32;11;8;4	2;2;1;1;1;0;0;0	13099000000	13045000000	14578000000	4F2 cell-surface antigen heavy chain	SLC3A2	;;;;	8	33	33	2	31	27	29	31	27	29	1	0	1	56.9	56.9	5.7	64.872	599	599;630;631;568;661;247;175;122	1	717	0	323.31	51.9	48.7	51.9	13451000000	15107000000	13394000000	14989000000	46	46	47	545
F5H012;P19474;P19474-2;H0YDP8	F5H012;P19474;P19474-2	13;13;11;3	13;13;11;3	13;13;11;3	304810000	314470000	315960000	E3 ubiquitin-protein ligase TRIM21	TRIM21	;;	4	13	13	13	13	8	7	13	8	7	13	8	7	34.5	34.5	34.5	54.081	475	475;475;398;90	1	116	0	97.346	34.5	19.4	18.3	317110000	433650000	304530000	249520000	7	4	2	46
F5H0B0;H0YC44;P55327-8;H0YC42;U3KQQ8	F5H0B0;H0YC44;P55327-8	10;5;5;2;1	2;0;0;2;1	0;0;0;0;0	46535000	49847000	30013000	Tumor protein D52	TPD52	;;	5	10	2	0	10	8	9	2	2	2	0	0	0	42.8	7.6	0	31.17	278	278;148;151;94;83	1	25	0	4.9827	42.8	30.2	31.7	36589000	53625000	60600000	27118000	1	0	0	7
F5H0L8;Q9Y6Y8;Q9Y6Y8-2;H7C0V8;H7C4C4	F5H0L8;Q9Y6Y8;Q9Y6Y8-2	10;10;9;3;2	10;10;9;3;2	10;10;9;3;2	96693000	61324000	75431000	SEC23-interacting protein	SEC23IP	;;	5	10	10	10	6	7	2	6	7	2	6	7	2	16.7	16.7	16.7	89.666	789	789;1000;924;194;153	1	71	0	17.608	11.2	12.8	3.7	75319000	108350000	74338000	17934000	3	3	2	32
F5H144;Q9Y653-5;Q9Y653-2;Q9Y653-3;Q9Y653;H3BSJ6;H3BRH0;Q9Y653-4;H3BNH4;H3BV52	F5H144;Q9Y653-5;Q9Y653-2;Q9Y653-3;Q9Y653;H3BSJ6;H3BRH0;Q9Y653-4	5;5;5;5;5;3;3;3;1;1	5;5;5;5;5;3;3;3;1;1	5;5;5;5;5;3;3;3;1;1	147730000	125900000	108860000	G-protein coupled receptor 56;GPR56 N-terminal fragment;GPR56 C-terminal fragment	GPR56;ADGRG1	;;;;;;;	10	5	5	5	4	4	4	4	4	4	4	4	4	12.5	12.5	12.5	57.375	512	512;518;687;692;693;187;256;523;198;199	1	69	0	16.514	10.2	10.2	10.2	128270000	164780000	131330000	80319000	4	2	0	20
F5H170;Q8WW22-3;Q8WW22;Q8WW22-2	F5H170;Q8WW22-3;Q8WW22;Q8WW22-2	2;2;2;2	2;2;2;2	2;2;2;2	144950000	284400000	58187000	DnaJ homolog subfamily A member 4	DNAJA4	;;;	4	2	2	2	2	2	1	2	2	1	2	2	1	4.1	4.1	4.1	24.377	219	219;370;397;426	1	22	0.0093586	1.7043	4.1	4.1	3.7	115100000	145540000	341050000	99640000	2	2	0	11
F5H1F6;F5H4M0;Q9H9H4	F5H1F6;F5H4M0;Q9H9H4	5;5;5	5;5;5	5;5;5	0	30238000	0	Vacuolar protein sorting-associated protein 37B	VPS37B	;;	3	5	5	5	2	2	1	2	2	1	2	2	1	40.2	40.2	40.2	20.654	184	184;271;285	1	27	0	3.8773	15.2	10.3	9.8	16919000	10757000	25154000	15367000	0	1	0	8
F5H1G9;F8WA55;F8WA56;A6NFN2;Q8IZP0-10;Q8IZP0-8;Q8IZP0-7;Q8IZP0-2;Q8IZP0-4;Q8IZP0-3;Q8IZP0-5;Q8IZP0-6;Q8IZP0-9;Q8IZP0;Q8IZP0-12;Q8IZP0-11;E9PEZ7;E7EW77;E7EP65;J3KNB2;Q9NYB9-3;Q9NYB9-2;Q9NYB9-4;Q9NYB9;H0Y6B5;F8WAL6	F5H1G9;F8WA55;F8WA56;A6NFN2;Q8IZP0-10;Q8IZP0-8;Q8IZP0-7;Q8IZP0-2;Q8IZP0-4;Q8IZP0-3;Q8IZP0-5;Q8IZP0-6;Q8IZP0-9;Q8IZP0;Q8IZP0-12;Q8IZP0-11	8;8;8;8;8;8;8;8;8;8;8;8;8;8;7;6;2;2;2;2;2;2;2;2;1;1	8;8;8;8;8;8;8;8;8;8;8;8;8;8;7;6;2;2;2;2;2;2;2;2;1;1	8;8;8;8;8;8;8;8;8;8;8;8;8;8;7;6;2;2;2;2;2;2;2;2;1;1	112760000	125620000	127430000	Abl interactor 1	ABI1	;;;;;;;;;;;;;;;	26	8	8	8	4	6	3	4	6	3	4	6	3	26.9	26.9	26.9	43.473	394	394;423;482;509;388;393;422;446;451;452;476;480;481;508;496;329;458;480;486;513;401;475;507;513;293;299	1	52	0	19.025	13.5	18	7.4	104870000	115020000	148930000	122520000	3	3	0	28
F5H1H0;F5H025;P32004-3;P32004-2;P32004;H0Y5C3;E7EVM4;E7EPI4;E9PHJ4;H3BLW5	F5H1H0;F5H025;P32004-3;P32004-2;P32004	35;35;35;35;35;6;4;4;3;1	35;35;35;35;35;6;4;4;3;1	32;32;32;32;32;6;1;1;0;1	2852800000	2931700000	3098400000	Neural cell adhesion molecule L1	L1CAM	;;;;	10	35	35	32	29	29	31	29	29	31	26	26	28	37.4	37.4	35.4	139.67	1255	1255;1259;1248;1253;1257;190;128;150;83;153	1	531	0	323.31	29.6	30.6	32.7	2797900000	3001800000	3254900000	3221000000	28	25	31	318
F5H1S8;Q14165;H0YG07;F5GX14	F5H1S8;Q14165;H0YG07	6;6;3;2	6;6;3;2	6;6;3;2	220360000	212700000	209630000	Malectin	MLEC	;;	4	6	6	6	6	6	6	6	6	6	6	6	6	54.1	54.1	54.1	16.729	146	146;292;173;217	1	78	0	11.132	54.1	54.1	54.1	194890000	260770000	238250000	251590000	3	3	3	33
F5H1S9;G8JLB3;Q9Y606-2;Q9Y606;F5GY32	F5H1S9;G8JLB3;Q9Y606-2;Q9Y606	4;4;4;4;1	4;4;4;4;1	4;4;4;4;1	41819000	43264000	0	tRNA pseudouridine synthase;tRNA pseudouridine synthase A, mitochondrial	PUS1	;;;	5	4	4	4	3	4	1	3	4	1	3	4	1	11.8	11.8	11.8	41.729	374	374;384;399;427;153	1	38	0	5.032	8.3	11.8	2.9	42235000	40256000	55377000	23121000	1	1	1	7
F5H1Y4;Q9HD26-2;Q9HD26;Q9HD26-3	F5H1Y4;Q9HD26-2;Q9HD26;Q9HD26-3	12;12;12;7	12;12;12;7	12;12;12;7	217340000	205250000	192810000	Golgi-associated PDZ and coiled-coil motif-containing protein	GOPC	;;;	4	12	12	12	9	8	8	9	8	8	9	8	8	36.4	36.4	36.4	50.584	462	462;454;462;319	1	98	0	55.786	26	24.5	23.2	255620000	254590000	201430000	222350000	7	3	6	53
F5H1Z7;Q99985;B4DRL8	F5H1Z7;Q99985	8;8;2	8;8;2	8;8;2	127110000	99331000	104470000	Semaphorin-3C	SEMA3C	;	3	8	8	8	6	4	7	6	4	7	6	4	7	15.2	15.2	15.2	87.284	769	769;751;233	1	57	0	21.125	11.6	8.5	13.8	106610000	133080000	104900000	132280000	3	1	3	26
F5H2A7;P61758	F5H2A7;P61758	9;9	9;9	9;9	581020000	520600000	435230000	Prefoldin subunit 3	VBP1	;	2	9	9	9	9	6	7	9	6	7	9	6	7	45.3	45.3	45.3	22.286	192	192;197	1	114	0	55.995	45.3	30.7	35.4	570570000	637190000	537780000	413470000	6	3	4	44
F5H2H5;Q86XL3;Q86XL3-2;F5H6J0;F5H417;F5H1D4;Q86XL3-3	F5H2H5;Q86XL3;Q86XL3-2	9;9;7;2;2;1;1	9;9;7;2;2;1;1	9;9;7;2;2;1;1	96270000	94059000	79138000	Ankyrin repeat and LEM domain-containing protein 2	ANKLE2	;;	7	9	9	9	6	5	6	6	5	6	6	5	6	16	16	16	97.722	876	876;938;648;129;251;258;293	1	65	0	21.491	10.7	8.7	8.9	77862000	107200000	96819000	69078000	4	3	3	31
F5H2J3;Q96GC9;K7EL93;K7EL74;K7ENU2;K7EK01;K7EMI0;K7ELS2;K7EL46;K7EPE7;B4DED7;B4DGZ7;B4DVV9	F5H2J3;Q96GC9;K7EL93;K7EL74;K7ENU2;K7EK01;K7EMI0;K7ELS2	3;3;2;2;2;2;2;2;1;1;1;1;1	3;3;2;2;2;2;2;2;1;1;1;1;1	3;3;2;2;2;2;2;2;1;1;1;1;1	57785000	58146000	57014000	Vacuole membrane protein 1	VMP1	;;;;;;;	13	3	3	3	3	3	3	3	3	3	3	3	3	15.1	15.1	15.1	40.075	350	350;406;74;75;78;92;138;167;58;225;272;309;214	1	32	0	5.2626	15.1	15.1	15.1	58165000	63247000	71920000	56360000	0	0	2	14
F5H2S7;Q13561;Q13561-3;Q13561-2;F5H223;H0YI98;F8W1I6;F8VW18;F8VX93;F8VRV7;H0YHL1;F8W0U6	F5H2S7;Q13561;Q13561-3;Q13561-2;F5H223;H0YI98;F8W1I6	17;17;17;17;16;12;12;8;4;4;3;1	17;17;17;17;16;12;12;8;4;4;3;1	17;17;17;17;16;12;12;8;4;4;3;1	866110000	860700000	972680000	Dynactin subunit 2	DCTN2	;;;;;;	12	17	17	17	14	14	14	14	14	14	14	14	14	62.3	62.3	62.3	44.809	406	406;401;403;406;378;268;315;278;135;152;128;45	1	218	0	134.88	53.9	46.3	45.8	898700000	1006800000	1100500000	986670000	10	5	6	88
F5H2V0;D3YTF9;Q9NNW7;F5H1L4;E7ENA2;D3YTF8;Q9NNW7-2;E7EWK1;Q9NNW7-3;Q9NNW7-4	F5H2V0;D3YTF9;Q9NNW7;F5H1L4;E7ENA2;D3YTF8;Q9NNW7-2;E7EWK1;Q9NNW7-3	13;13;13;12;12;12;12;10;8;4	12;12;12;11;11;11;11;9;8;4	12;12;12;11;11;11;11;9;8;4	111500000	90364000	93457000	Thioredoxin reductase 2, mitochondrial	TXNRD2	;;;;;;;;	10	13	12	12	10	9	8	9	8	7	9	8	7	42.6	39.7	39.7	56.228	521	521;523;524;492;494;499;498;338;428;277	1	79	0	20.128	33.4	25.1	22.1	40892000	146410000	105180000	92390000	5	7	1	28
F5H357;B4E3T4;Q93062-4;Q93062-5;Q93062;Q93062-2;Q93062-3;H0YBU9;Q6ZRY4	F5H357;B4E3T4;Q93062-4;Q93062-5;Q93062;Q93062-2;Q93062-3	3;3;3;3;3;3;3;1;1	3;3;3;3;3;3;3;1;1	3;3;3;3;3;3;3;1;1	15200000	18292000	19881000	RNA-binding protein with multiple splicing	RBPMS	;;;;;;	9	3	3	3	3	2	3	3	2	3	3	2	3	23.5	23.5	23.5	17.135	153	153;224;143;152;196;204;219;119;209	1	27	0	6.9173	23.5	14.4	23.5	17904000	24753000	12628000	23653000	2	0	1	10
F5H365;Q15436;F5H6C4;B3KXI2;G3V5X8;G3V4Q2;G3V4V1;G3V1W4;G3V3G5;G3V2R6;G3V5K1	F5H365;Q15436;F5H6C4;B3KXI2	26;26;21;20;4;4;4;4;4;4;2	26;26;21;20;4;4;4;4;4;4;2	24;24;20;19;3;3;3;3;3;3;1	1216600000	1077300000	1153300000	Protein transport protein Sec23A	SEC23A	;;;	11	26	26	24	23	22	21	23	22	21	21	20	19	50.5	50.5	47.3	82.968	736	736;765;663;563;85;86;93;108;140;169;40	1	336	0	323.01	42	41.3	40.2	1251200000	1446400000	928350000	1197800000	16	11	11	182
F5H3S5;F5H0F9;Q9UJX4;F5GZ05;F5GY68;Q9UJX4-3	F5H3S5;F5H0F9;Q9UJX4;F5GZ05;F5GY68;Q9UJX4-3	2;2;2;1;1;1	2;2;2;1;1;1	2;2;2;1;1;1	0	9645500	0	Anaphase-promoting complex subunit 5	ANAPC5	;;;;;	6	2	2	2	2	2	1	2	2	1	2	2	1	9.7	9.7	9.7	24.778	216	216;742;755;44;217;643	1	16	0	4.8593	9.7	9.7	4.2	3761800	12293000	14070000	0	2	2	1	10
F5H442;Q99816;Q99816-2;J3QRU6;J3QKS4	F5H442;Q99816	7;7;3;1;1	7;7;3;1;1	7;7;3;1;1	88189000	84088000	102110000	Tumor susceptibility gene 101 protein	TSG101	;	5	7	7	7	4	3	2	4	3	2	4	3	2	27.4	27.4	27.4	40.917	365	365;390;285;63;77	1	45	0	35.471	13.7	9.9	9	44720000	128840000	68755000	80240000	1	1	0	16
F5H4E4;Q9HA64;I3L2G3;I3L139;I3L2K8;I3L3W5;I3L378	F5H4E4;Q9HA64;I3L2G3;I3L139	4;4;2;2;1;1;1	4;4;2;2;1;1;1	4;4;2;2;1;1;1	157200000	0	0	Ketosamine-3-kinase	FN3KRP	;;;	7	4	4	4	4	3	1	4	3	1	4	3	1	22	22	22	28.964	259	259;309;127;145;50;102;124	1	30	0	12.776	22	15.4	5	19163000	151910000	102960000	19413000	1	0	0	3
F5H4G7;F5GYL8;O60684;Q5TFJ7;O15131;S4R3E5	F5H4G7;F5GYL8;O60684	15;15;15;7;7;4	15;15;15;7;7;4	9;9;9;3;2;4	388950000	438390000	330570000	Importin subunit alpha-7	KPNA6	;;	6	15	15	9	13	10	10	13	10	10	7	5	5	34.9	34.9	25.3	59.667	533	533;541;536;321;536;186	1	162	0	104.97	31.1	24.2	29.1	394320000	537650000	435410000	373730000	10	9	4	94
F5H4J2;O75381-2;O75381	F5H4J2;O75381-2;O75381	5;5;5	5;5;5	5;5;5	91270000	84615000	120130000	Peroxisomal membrane protein PEX14	PEX14	;;	3	5	5	5	5	5	4	5	5	4	5	5	4	22	22	22	34.216	313	313;334;377	1	64	0	11.438	22	22	11.8	145980000	136020000	96351000	80441000	3	1	0	28
F5H4K0;Q5T9L3;Q5T9L3-2;Q5T9L3-3;E9PM62;E9PKJ0;E9PJW4;H0YCG9;E9PQK1;Q7Z430;E9PM23;H0YDL2	F5H4K0;Q5T9L3;Q5T9L3-2;Q5T9L3-3;E9PM62;E9PKJ0;E9PJW4;H0YCG9	7;7;7;6;5;4;4;4;3;2;1;1	7;7;7;6;5;4;4;4;3;2;1;1	7;7;7;6;5;4;4;4;3;2;1;1	180050000	205200000	204830000	Protein wntless homolog	WLS	;;;;;;;	12	7	7	7	7	7	7	7	7	7	7	7	7	14.7	14.7	14.7	62.719	545	545;541;543;450;222;122;134;200;152;127;38;152	1	89	0	13.556	14.7	14.7	14.7	222270000	201930000	236080000	212740000	3	3	2	41
F5H4Z3;Q5QPM7;Q92530;H0Y555;Q5QPM9;E7ER20	F5H4Z3;Q5QPM7;Q92530;H0Y555;Q5QPM9;E7ER20	2;2;2;1;1;1	2;2;2;1;1;1	2;2;2;1;1;1	70915000	55609000	52372000	Proteasome inhibitor PI31 subunit	PSMF1	;;;;;	6	2	2	2	2	2	2	2	2	2	2	2	2	15.4	15.4	15.4	19.29	175	175;263;271;107;183;201	1	36	0	5.6877	15.4	15.4	15.4	55795000	74040000	61117000	60093000	0	2	2	14
F5H569;Q93050-1;Q93050;Q93050-3;B7Z641;B7Z2A9;K7EM24;K7EN36;K7EPG4;F5H1T6	F5H569;Q93050-1;Q93050;Q93050-3;B7Z641;B7Z2A9	4;4;4;4;3;3;1;1;1;1	4;4;4;4;3;3;1;1;1;1	3;3;3;3;2;2;1;1;1;0	47656000	47477000	32190000	V-type proton ATPase 116 kDa subunit a isoform 1;V-type proton ATPase subunit a	ATP6V0A1	;;;;;	10	4	4	3	4	3	4	4	3	4	3	2	3	5.7	5.7	4.8	96.313	837	837;831;837;838;788;794;130;195;198;483	1	42	0	7.1765	5.7	4.7	5.7	46433000	51629000	44152000	45975000	2	1	0	15
F5H577;Q8WUW1;Q8WUW1-2	F5H577;Q8WUW1;Q8WUW1-2	3;3;3	3;3;3	3;3;3	108090000	90587000	81007000	Protein BRICK1	BRK1	;;	3	3	3	3	3	2	3	3	2	3	3	2	3	30.5	30.5	30.5	11.945	105	105;75;106	1	33	0	8.8139	30.5	20	30.5	91806000	116210000	64037000	98907000	1	0	0	10
F5H5D3;Q9BQE3;F8VVB9;F8VS66;F8VRZ4;F8VWV9;F8VX09;C9K0S6;F8VRK0;F8W0F6;Q9H853;F8VXZ7	F5H5D3;Q9BQE3;F8VVB9	29;29;15;8;7;5;4;2;2;2;2;1	2;2;0;0;0;0;0;0;0;0;0;0	2;2;0;0;0;0;0;0;0;0;0;0	1259100000	1188100000	1345200000	Tubulin alpha-1C chain	TUBA1C;TUBA1B	;;	12	29	2	2	25	27	27	2	2	2	2	2	2	66.1	7.9	7.9	57.73	519	519;449;246;130;112;81;75;47;49;231;241;26	1	90	0	188.27	65.9	66.1	66.1	1907100000	1531100000	1443400000	1675000000	6	4	7	79
F5H5I6;H0Y8R1;H0YAK1;Q12849-5;Q12849;H0YAM1	F5H5I6;H0Y8R1;H0YAK1;Q12849-5;Q12849	12;12;12;12;12;4	12;12;12;12;12;4	12;12;12;12;12;4	236680000	286410000	269430000	G-rich sequence factor 1	GRSF1	;;;;	6	12	12	12	9	8	10	9	8	10	9	8	10	49.7	49.7	49.7	41.634	362	362;417;453;318;480;114	1	112	0	52.028	40.6	33.7	41.7	308040000	188930000	215340000	337790000	4	6	9	60
F5H5N1;F5GXJ1;B3KRI2;O75251	F5H5N1;F5GXJ1;B3KRI2;O75251	1;1;1;1	1;1;1;1	1;1;1;1	0	11887000	0	NADH dehydrogenase [ubiquinone] iron-sulfur protein 7, mitochondrial	NDUFS7	;;;	4	1	1	1	1	1	0	1	1	0	1	1	0	7.7	7.7	7.7	19.77	182	182;236;206;213	1	3	0	9.6771	7.7	7.7	0	0	27852000	12586000	0	0	0	0	0
F5H5Y2;P43307-2;P43307;C9J3L8;C9J5W0;E9PAL7;C9IZQ1;C9JBX5;C9JY01	F5H5Y2;P43307-2;P43307;C9J3L8;C9J5W0;E9PAL7;C9IZQ1	6;6;6;5;5;5;5;2;1	6;6;6;5;5;5;5;2;1	6;6;6;5;5;5;5;2;1	1308800000	982180000	1266400000	Translocon-associated protein subunit alpha	SSR1	;;;;;;	9	6	6	6	6	6	5	6	6	5	6	6	5	29.7	29.7	29.7	29.42	259	259;259;286;265;266;291;298;218;103	1	118	0	129.1	29.7	29.7	29.7	1379500000	1680300000	826290000	1022600000	11	6	8	91
F5H619;Q86XA9-2;Q86XA9;B5MC49;H7C5W6;E9PB09;F8VQQ6;H0YIW3;Q86XA9-3	F5H619;Q86XA9-2;Q86XA9;B5MC49;H7C5W6;E9PB09	7;7;7;6;4;4;2;2;2	7;7;7;6;4;4;2;2;2	6;6;6;5;4;4;1;2;1	26509000	0	0	HEAT repeat-containing protein 5A	HEATR5A	;;;;;	9	7	7	6	5	3	2	5	3	2	5	3	2	5	5	3.9	222.7	2046	2046;1965;2040;1140;1599;1753;87;896;113	1	39	0	7.0311	3.2	1.7	1.1	24781000	32416000	27597000	16231000	1	1	0	9
F5H698;Q9P2J5;B4DER1;B4DJ10	F5H698;Q9P2J5;B4DER1;B4DJ10	42;42;41;41	42;42;41;41	42;42;41;41	2192500000	2046900000	2140000000	Leucine--tRNA ligase, cytoplasmic	LARS	;;;	4	42	42	42	36	33	33	36	33	33	36	33	33	46.9	46.9	46.9	129.21	1130	1130;1176;1149;1122	1	507	0	241.88	40.4	35.6	34.9	1798200000	2467600000	2120100000	2246500000	29	28	25	309
F5H6E2;O00159-3;O00159;O00159-2;I3L501;I3L204;I3L168;I3L3F5;I3L4D4;I3L3Y6	F5H6E2;O00159-3;O00159;O00159-2	17;17;17;16;3;3;2;2;2;2	17;17;17;16;3;3;2;2;2;2	17;17;17;16;3;3;2;2;2;2	163650000	170590000	186260000	Unconventional myosin-Ic	MYO1C	;;;	10	17	17	17	9	11	11	9	11	11	9	11	11	23	23	23	118.99	1039	1039;1044;1063;1028;168;267;134;137;164;170	1	144	0	47.083	11.3	15.8	15	264900000	140390000	185740000	210370000	5	6	5	65
F5H6I0;P61769	F5H6I0;P61769	4;4	4;4	1;1	5705900000	7132300000	6383300000	Beta-2-microglobulin;Beta-2-microglobulin form pI 5.3	B2M	;	2	4	4	1	4	3	3	4	3	3	1	1	1	53.3	53.3	18	13.972	122	122;119	1	83	0	56.628	53.3	34.4	34.4	5877500000	6112100000	7615600000	6492300000	5	6	5	70
F5H6U7;Q9Y3E0;G3V1U5;F5GWD8;F5GXH6	F5H6U7;Q9Y3E0;G3V1U5	3;3;2;1;1	3;3;2;1;1	3;3;2;1;1	83122000	169810000	100910000	Vesicle transport protein GOT1B	GOLT1B	;;	5	3	3	3	3	3	3	3	3	3	3	3	3	18.8	18.8	18.8	14.307	128	128;138;74;40;42	1	59	0	20.312	18.8	18.8	18.8	126590000	124520000	176880000	141820000	5	2	5	47
F5H6Y0;H3BMM5;Q96AX1;F5H7N5	F5H6Y0;H3BMM5;Q96AX1	4;4;4;1	4;4;4;1	4;4;4;1	24843000	17088000	24900000	Vacuolar protein sorting-associated protein 33A	VPS33A	;;	4	4	4	4	3	2	2	3	2	2	3	2	2	23.7	23.7	23.7	21.226	186	186;538;596;42	1	38	0	5.5082	19.9	10.8	10.8	20103000	29080000	16692000	25359000	3	1	1	19
F5H715;Q96BJ3;Q96BJ3-2;Q96BJ3-3	F5H715;Q96BJ3	7;7;3;3	7;7;3;3	7;7;3;3	104110000	73027000	90511000	Axin interactor, dorsalization-associated protein	AIDA	;	4	7	7	7	5	5	6	5	5	6	5	5	6	35.5	35.5	35.5	32.021	282	282;306;141;224	1	66	0	13.821	24.8	24.8	29.1	55977000	108360000	89839000	114070000	3	1	1	22
F5H7B0;Q15477;H7C5N0;H7C4L3	F5H7B0;Q15477	13;13;2;1	13;13;2;1	13;13;2;1	124530000	135100000	141650000	Helicase SKI2W	SKIV2L	;	4	13	13	13	8	9	8	8	9	8	8	9	8	16	16	16	116.48	1053	1053;1246;156;182	1	107	0	22.482	10.4	11.5	9.7	145610000	134890000	148820000	139860000	3	1	2	24
F5H843;O60669	F5H843;O60669	2;2	2;2	2;2	40495000	38311000	37370000	Monocarboxylate transporter 2	SLC16A7	;	2	2	2	2	2	2	2	2	2	2	2	2	2	5	5	5	41.718	379	379;478	1	24	0.0002635	3.3582	5	5	5	43350000	44758000	40358000	38213000	1	0	1	14
F5H8E5;Q93009-3;Q93009;H3BND8;F5H2X1	F5H8E5;Q93009-3;Q93009;H3BND8	16;16;16;13;5	16;16;16;13;5	16;16;16;13;5	301120000	273300000	284850000	Ubiquitin carboxyl-terminal hydrolase 7;Ubiquitin carboxyl-terminal hydrolase	USP7	;;;	5	16	16	16	13	11	9	13	11	9	13	11	9	20.2	20.2	20.2	117	1003	1003;1086;1102;909;509	1	152	0	80.933	16.2	14	11.3	236210000	346020000	316470000	175390000	6	4	4	63
F5H8H2;Q03426;F5H092;B7Z1C2;F5H163;F5H368;F5GXC0	F5H8H2;Q03426;F5H092;B7Z1C2	4;4;2;2;1;1;1	4;4;2;2;1;1;1	4;4;2;2;1;1;1	0	57769000	69761000	Mevalonate kinase	MVK	;;;	7	4	4	4	3	3	4	3	3	4	3	3	4	17.4	17.4	17.4	37.171	344	344;396;200;202;83;117;170	1	49	0	4.5414	9.6	15.1	17.4	88978000	52985000	56480000	79737000	0	2	0	6
F6S0T5;O60341;O60341-2;R4GMQ1;R4GMP9	F6S0T5;O60341;O60341-2	13;13;13;3;3	13;13;13;3;3	13;13;13;3;3	138850000	99033000	112780000	Lysine-specific histone demethylase 1A	KDM1A	;;	5	13	13	13	9	6	7	9	6	7	9	6	7	24.7	24.7	24.7	95.222	876	876;852;876;189;301	1	76	0	40.341	16.4	8.7	9.8	133550000	155810000	83910000	120610000	6	3	1	25
F6T1Q0;Q6L8Q7-2;Q6L8Q7	F6T1Q0;Q6L8Q7-2;Q6L8Q7	8;8;8	8;8;8	8;8;8	146160000	112230000	114550000	2,5-phosphodiesterase 12	PDE12	;;	3	8	8	8	6	6	5	6	6	5	6	6	5	30.9	30.9	30.9	52.175	472	472;535;609	1	65	0	17.097	18.2	18.2	13.6	126950000	167330000	157880000	97525000	3	2	2	28
F6TR53;Q53T59;B5MC96	F6TR53;Q53T59;B5MC96	3;3;2	3;3;2	3;3;2	42265000	45300000	33647000	HCLS1-binding protein 3	HS1BP3	;;	3	3	3	3	3	3	3	3	3	3	3	3	3	16.9	16.9	16.9	23.6	213	213;392;199	1	28	0	7.3297	16.9	16.9	16.9	43301000	45614000	50308000	38943000	0	1	1	5
F6U1T9;D3YTA9;P63098;H7BYZ3	F6U1T9;D3YTA9;P63098;H7BYZ3	8;8;8;6	8;8;8;6	8;8;8;6	236540000	241950000	261220000	Calcineurin subunit B type 1	PPP3R1	;;;	4	8	8	8	7	6	6	7	6	6	7	6	6	65.6	65.6	65.6	18.208	160	160;189;170;331	1	86	0	39.36	60.6	42.5	50.6	211280000	312450000	270750000	239030000	6	5	4	60
F6UJY9;J9JIE9;E7EWH8;F6UJY1;Q5T013-3;Q5T013;H0YB18;H0YB70;Q5T015;Q5T013-2;Q5T013-4	F6UJY9;J9JIE9;E7EWH8;F6UJY1;Q5T013-3;Q5T013;H0YB18;H0YB70;Q5T015;Q5T013-2;Q5T013-4	2;2;2;2;2;2;1;1;1;1;1	2;2;2;2;2;2;1;1;1;1;1	2;2;2;2;2;2;1;1;1;1;1	24044000	0	30045000	Hydroxypyruvate isomerase;Putative hydroxypyruvate isomerase	HYI	;;;;;;;;;;	11	2	2	2	2	2	2	2	2	2	2	2	2	15	15	15	23.031	213	213;238;276;302;247;277;161;186;229;174;204	1	28	0	10.224	15	15	15	33817000	23451000	18262000	30741000	0	2	2	16
F8VQ10;Q13838;Q13838-2;Q5STU3;B4DP52;F6WLT2;F6UJC5;F6S4E6;F6TRA5;B4DIJ6;H0Y400;F6QYI9;F6R6M7;H0YCC6;K7EN69;K7ENP6;F6QWI5;K7EL56;K7EIL8;F6U6E2;F6S2B7;F6SXL5;E7EMX2;K7EN25	F8VQ10;Q13838;Q13838-2;Q5STU3;B4DP52;F6WLT2;F6UJC5;F6S4E6;F6TRA5	22;22;22;19;18;15;12;11;11;9;7;6;6;5;4;3;3;3;3;3;3;3;3;3	22;22;22;19;18;15;12;11;11;9;7;6;6;5;4;3;3;3;3;3;3;3;3;3	10;10;10;9;10;6;7;3;3;4;3;1;1;4;0;0;0;0;0;0;0;0;0;0	4349200000	4458900000	4540500000	Spliceosome RNA helicase DDX39B	DDX39B;hCG_2005638	;;;;;;;;	24	22	22	10	22	22	22	22	22	22	10	10	10	57.1	57.1	27.8	50.745	443	443;428;443;425;350;289;245;231;238;243;187;187;197;141;130;92;96;108;125;125;132;136;139;176	1	391	0	247.38	57.1	57.1	57.1	4503200000	4594200000	4665100000	4813500000	28	27	26	298
F8VSC5;Q6P3W7;F8VPW3;H0YIK6	F8VSC5;Q6P3W7	5;5;1;1	5;5;1;1	5;5;1;1	37510000	47689000	0	SCY1-like protein 2	SCYL2	;	4	5	5	5	4	2	2	4	2	2	4	2	2	10.6	10.6	10.6	77.053	681	681;929;76;115	1	38	0	9.6591	8.2	3.8	4.4	35728000	51782000	23578000	39616000	0	1	0	12
F8VSZ4;Q9UIW2;Q9HCM2-4;Q9HCM2	F8VSZ4;Q9UIW2	3;3;1;1	3;3;1;1	1;1;1;1	0	0	15891000	Plexin-A1	PLXNA1	;	4	3	3	1	2	1	2	2	1	2	1	0	0	1.8	1.8	0.8	208.55	1873	1873;1896;344;1894	1	20	0.0029268	2.3883	1.2	0.4	1	15420000	12310000	3809000	15892000	1	0	2	8
F8VU90;Q9NYL4-2;Q9NYL4;H0YHM7;E9PAR0	F8VU90;Q9NYL4-2;Q9NYL4	3;3;3;1;1	3;3;3;1;1	3;3;3;1;1	76084000	73201000	0	Peptidyl-prolyl cis-trans isomerase;Peptidyl-prolyl cis-trans isomerase FKBP11	FKBP11	;;	5	3	3	3	3	3	1	3	3	1	3	3	1	21.4	21.4	21.4	19.814	182	182;146;201;63;99	1	32	0	31.963	21.4	21.4	5.5	59086000	130370000	50859000	4102400	2	1	0	14
F8VV56;F8W022;F8VWK8;C9JV86;P08962-3;P08962-2;P08962;F8VNT9	F8VV56;F8W022;F8VWK8;C9JV86;P08962-3;P08962-2;P08962;F8VNT9	5;5;5;5;5;5;5;3	5;5;5;5;5;5;5;3	5;5;5;5;5;5;5;3	951170000	1110800000	847860000	Tetraspanin;CD63 antigen	CD63	;;;;;;;	8	5	5	5	5	3	4	5	3	4	5	3	4	29	29	29	16.021	145	145;215;217;236;156;215;238;133	1	54	0	25.062	29	27.6	27.6	1157100000	1213000000	1354500000	1047300000	2	3	2	38
F8VVA7;P61923;F8VYZ4;P61923-5;P61923-4;F8VXB1;F8W156;F8W651;F8VUC5;F8VXR1;P61923-3;F8VYK5;F8VYE0;P61923-2	F8VVA7;P61923;F8VYZ4;P61923-5;P61923-4;F8VXB1;F8W156;F8W651;F8VUC5;F8VXR1;P61923-3	6;6;5;5;5;4;4;4;3;3;3;2;2;2	6;6;5;5;5;4;4;4;3;3;3;2;2;2	6;6;5;5;5;4;4;4;3;3;3;2;2;2	363850000	397220000	431390000	Coatomer subunit zeta-1	COPZ1	;;;;;;;;;;	14	6	6	6	5	4	4	5	4	4	5	4	4	52	52	52	22.34	198	198;177;163;160;185;92;107;119;95;138;154;89;164;126	1	84	0	170.88	46.5	29.8	29.8	361110000	502660000	376050000	404550000	7	6	5	78
F8VW96;Q16527;F8VQR7	F8VW96;Q16527;F8VQR7	5;5;4	5;5;4	5;5;4	138070000	127740000	114580000	Cysteine and glycine-rich protein 2	CSRP2	;;	3	5	5	5	4	5	5	4	5	5	4	5	5	25.9	25.9	25.9	26.736	243	243;193;187	1	57	0	15.228	21.8	25.9	25.9	161960000	82839000	144040000	129680000	2	2	2	21
F8VX04;Q9H2H9;F8VX12	F8VX04;Q9H2H9	4;4;1	4;4;1	4;4;1	80457000	157880000	112590000	Sodium-coupled neutral amino acid transporter 1	SLC38A1	;	3	4	4	4	2	3	3	2	3	3	2	3	3	7.2	7.2	7.2	56.195	503	503;487;78	1	29	0	9.4182	3.4	5.4	5.4	91827000	40886000	187990000	120320000	1	1	3	20
F8VXC8;Q8TAQ2-2;Q8TAQ2-3;Q8TAQ2;F8VZW6	F8VXC8;Q8TAQ2-2;Q8TAQ2-3;Q8TAQ2	11;11;11;11;1	11;11;11;11;1	4;4;4;4;1	120370000	116300000	123860000	SWI/SNF complex subunit SMARCC2	SMARCC2	;;;	5	11	11	4	8	6	7	8	6	7	2	1	3	9.9	9.9	4.4	136.18	1245	1245;1130;1152;1214;105	1	88	0	18.705	6.1	4.7	5.9	124460000	173960000	121520000	130690000	3	2	2	24
F8VXI9;Q14161-4;Q14161-3;Q14161;R4GNG3;F8W7V0;F8WAK2;Q14161-9;Q14161-10;Q14161-8;Q14161-5;Q14161-11;Q14161-7;Q14161-6	F8VXI9;Q14161-4;Q14161-3;Q14161;R4GNG3;F8W7V0;F8WAK2;Q14161-9;Q14161-10;Q14161-8;Q14161-5;Q14161-11;Q14161-7;Q14161-6	6;6;6;6;5;5;5;5;5;5;5;4;4;4	6;6;6;6;5;5;5;5;5;5;5;4;4;4	5;5;5;5;4;4;4;4;4;4;4;3;3;3	30316000	34376000	33009000	ARF GTPase-activating protein GIT2	GIT2	;;;;;;;;;;;;;	14	6	6	5	4	3	3	4	3	3	3	2	2	8.8	8.8	7.6	78.866	708	708;709;744;759;641;649;681;648;681;694;729;631;646;661	1	37	0	6.6974	5.1	3.7	4	30286000	40820000	37844000	33126000	1	2	1	12
F8VXY3;P00973-2;P00973-4;P00973;P00973-3;H0YI20;H0YIB8;F8VUC8;F8VPW7	F8VXY3;P00973-2;P00973-4;P00973;P00973-3;H0YI20	6;6;6;6;6;4;2;2;1	6;6;6;6;6;4;2;2;1	6;6;6;6;6;4;2;2;1	148260000	133000000	173610000	2-5-oligoadenylate synthase 1	OAS1	;;;;;	9	6	6	6	5	6	4	5	6	4	5	6	4	22.8	22.8	22.8	41.474	360	360;364;382;400;414;302;130;177;83	1	69	0	27.146	18.3	22.8	16.1	117370000	117590000	177670000	128990000	5	3	2	36
F8VY35;F5H4R6;H0YIV4;P55209-2;P55209;F8W0J6;H0YH88;F8W020;F8VUX1;H0YHC3;F8VXI6;F8VVB5;F8VUC3;B7Z4K9	F8VY35;F5H4R6;H0YIV4;P55209-2;P55209;F8W0J6;H0YH88;F8W020;F8VUX1;H0YHC3;F8VXI6	10;10;10;10;10;8;7;7;7;6;6;4;1;1	9;9;9;9;9;7;6;6;6;5;5;3;1;1	1;1;1;1;1;1;0;1;1;0;1;1;0;0	1564900000	1667000000	1951800000	Nucleosome assembly protein 1-like 1	NAP1L1	;;;;;;;;;;	14	10	9	1	8	9	8	7	8	7	1	1	1	55.3	51.5	7.2	31.02	264	264;383;385;368;391;379;177;207;237;198;215;161;200;208	1	165	0	265.84	51.1	55.3	51.1	887130000	1912200000	2095400000	2073200000	7	9	12	112
F8VYH9;F8VTV8;F8VWX7;P11802;F8VXD2;F8VZZ0;F8VZ51;F8W1L8;B4DNF9;F8VYY1;Q96BE9	F8VYH9;F8VTV8;F8VWX7;P11802;F8VXD2;F8VZZ0;F8VZ51;F8W1L8;B4DNF9	6;6;6;6;4;4;4;3;3;2;2	5;5;5;5;3;3;3;3;2;2;2	5;5;5;5;3;3;3;3;2;2;2	99117000	133420000	142500000	Cyclin-dependent kinase 4	CDK4	;;;;;;;;	11	6	5	5	5	6	4	4	5	3	4	5	3	46.5	41.8	41.8	18.685	170	170;201;203;303;132;186;208;115;183;74;111	1	55	0	14.528	36.5	46.5	27.1	143460000	113990000	151830000	137260000	1	2	2	20
F8W111;P14384;F8VVI6;H0YHN7	F8W111;P14384;F8VVI6	4;4;2;1	4;4;2;1	4;4;2;1	31415000	40264000	44210000	Carboxypeptidase M	CPM	;;	4	4	4	4	3	3	3	3	3	3	3	3	3	21.7	21.7	21.7	28.314	249	249;443;136;198	1	37	0	12.636	17.7	15.3	15.3	35321000	37784000	40134000	40166000	3	1	0	23
F8W1A4;P54819-2;P54819;P54819-3;F8VZG5;F8VY04;P54819-5;P54819-6;P54819-4;G3V213;F8VPP1	F8W1A4;P54819-2;P54819;P54819-3;F8VZG5;F8VY04;P54819-5;P54819-6;P54819-4;G3V213	11;11;11;10;9;9;9;8;7;6;2	11;11;11;10;9;9;9;8;7;6;2	11;11;11;10;9;9;9;8;7;6;2	955920000	1010900000	1056000000	Adenylate kinase 2, mitochondrial;Adenylate kinase 2, mitochondrial;Adenylate kinase 2, mitochondrial, N-terminally processed	AK2	;;;;;;;;;	11	11	11	11	10	10	11	10	10	11	10	10	11	60.8	60.8	60.8	25.63	232	232;232;239;202;162;190;224;192;131;133;42	1	214	0	103.27	56.5	56.5	60.8	796020000	971510000	921550000	1097500000	13	7	11	121
F8W1Z6;Q7Z3U7-2;F8VWA6;Q7Z3U7-5;Q7Z3U7-4;Q7Z3U7;Q7Z3U7-3;F8VZV1	F8W1Z6;Q7Z3U7-2;F8VWA6;Q7Z3U7-5;Q7Z3U7-4;Q7Z3U7;Q7Z3U7-3	7;7;7;7;7;7;4;2	7;7;7;7;7;7;4;2	7;7;7;7;7;7;4;2	59834000	69098000	75314000	Protein MON2 homolog	MON2	;;;;;;	8	7	7	7	7	5	6	7	5	6	7	5	6	4.7	4.7	4.7	185.85	1675	1675;1676;1688;1711;1717;1718;586;1072	1	71	0	10.027	4.7	2.9	3.9	90476000	106730000	57813000	89585000	5	1	2	32
F8W6G5;C9JZ40;Q7Z2E3-3;Q7Z2E3-5;Q7Z2E3-9;Q7Z2E3-10;Q7Z2E3-11;Q7Z2E3-8;Q7Z2E3-7;Q7Z2E3;Q7Z2E3-6;Q7Z2E3-2;Q7Z2E3-4;F8WBD6;E7EUY4;F8WBM3;Q6JV79;E7EVB7;C9J8U3;Q7Z2E3-12;Q7Z2E3-13	F8W6G5;C9JZ40;Q7Z2E3-3;Q7Z2E3-5;Q7Z2E3-9;Q7Z2E3-10;Q7Z2E3-11;Q7Z2E3-8;Q7Z2E3-7;Q7Z2E3;Q7Z2E3-6;Q7Z2E3-2;Q7Z2E3-4	4;4;4;4;4;4;4;4;4;4;3;3;3;1;1;1;1;1;1;1;1	4;4;4;4;4;4;4;4;4;4;3;3;3;1;1;1;1;1;1;1;1	4;4;4;4;4;4;4;4;4;4;3;3;3;1;1;1;1;1;1;1;1	24492000	0	0	Aprataxin	APTX	;;;;;;;;;;;;	21	4	4	4	4	1	1	4	1	1	4	1	1	22.2	22.2	22.2	22.763	198	198;216;284;288;292;302;306;337;342;356;113;168;254;52;63;74;85;99;155;49;192	1	21	0	6.6699	22.2	4	5.6	6303900	43017000	7969900	5587200	1	0	0	5
F8W6I7;P09651-3;P09651-2;P09651;F8VZ49;Q32P51;F8VTQ5;H0YH80;F8W646;F8VYN5	F8W6I7;P09651-3;P09651-2;P09651;F8VZ49;Q32P51;F8VTQ5;H0YH80	17;17;17;17;12;12;10;9;6;5	16;16;16;16;11;11;9;9;6;4	15;15;15;15;11;10;9;8;6;4	5682800000	4715700000	5451500000	Heterogeneous nuclear ribonucleoprotein A1;Heterogeneous nuclear ribonucleoprotein A1, N-terminally processed;Heterogeneous nuclear ribonucleoprotein A1-like 2	HNRNPA1;HNRNPA1L2	;;;;;;;	10	17	16	15	16	15	16	15	14	15	14	13	14	59.9	57	54.7	33.155	307	307;267;320;372;231;320;145;191;156;113	1	323	0	323.31	59.3	55.7	59.6	5311100000	5817500000	5125500000	5764300000	21	16	18	234
F8W726;Q14157-4;Q14157-1;Q14157-3;Q14157;Q14157-5;Q5VU77;Q5VU79;Q5VU78;Q5VU81;Q5VU80;H0Y5H6;H7C2T8	F8W726;Q14157-4;Q14157-1;Q14157-3;Q14157;Q14157-5	25;25;25;25;25;25;12;9;9;8;8;2;2	25;25;25;25;25;25;12;9;9;8;8;2;2	25;25;25;25;25;25;12;9;9;8;8;2;2	945430000	905020000	896190000	Ubiquitin-associated protein 2-like	UBAP2L	;;;;;	13	25	25	25	20	23	21	20	23	21	20	23	21	39.2	39.2	39.2	113.5	1078	1078;976;983;1068;1087;1104;350;265;280;182;234;383;399	1	321	0	141.21	28.9	38.4	34.6	911360000	958850000	929740000	894580000	13	13	11	169
F8W727;P62910;D3YTB1;D3YTI8	F8W727;P62910;D3YTB1	10;10;9;2	10;10;9;2	10;10;9;2	2436800000	2878700000	2409900000	60S ribosomal protein L32	RPL32	;;	4	10	10	10	10	9	10	10	9	10	10	9	10	54.2	54.2	54.2	17.962	153	153;135;133;62	1	150	0	110.99	54.2	52.9	54.2	2086300000	2784400000	2882100000	2837200000	7	6	8	86
F8W7C6;H7C123;H7C2C5;Q96L21;H7C2U2	F8W7C6;H7C123;H7C2C5	11;6;6;5;1	1;0;0;0;0	1;0;0;0;0	191380000	217880000	215050000		RPL10	;;	5	11	1	1	9	10	10	1	1	1	1	1	1	54.6	11	11	18.592	163	163;91;131;214;28	1	24	0	51.549	54.6	54.6	54.6	221810000	207300000	228600000	225450000	2	2	2	25
F8W7D6;F5H039;Q9NQX3;Q9NQX3-2;H0YJR5;H0YJ30;G3V582	F8W7D6;F5H039;Q9NQX3;Q9NQX3-2	3;3;3;3;1;1;1	3;3;3;3;1;1;1	3;3;3;3;1;1;1	35066000	26027000	32728000	Gephyrin;Molybdopterin adenylyltransferase;Molybdopterin molybdenumtransferase	GPHN	;;;	7	3	3	3	2	3	3	2	3	3	2	3	3	6.1	6.1	6.1	76.331	705	705;782;736;769;201;280;380	1	27	0	5.9719	4.8	6.1	6.1	42168000	30014000	39476000	37609000	1	3	1	11
F8W7G7;P02751-5;P02751-17;P02751-3;P02751;P02751-7;P02751-15;P02751-4;P02751-6;P02751-11;P02751-10;P02751-9;P02751-14;P02751-13;P02751-8;P02751-12;H0Y7Z1;P02751-2;P02751-16;H0Y4K8	F8W7G7;P02751-5;P02751-17;P02751-3;P02751;P02751-7;P02751-15;P02751-4;P02751-6;P02751-11;P02751-10;P02751-9;P02751-14;P02751-13;P02751-8;P02751-12	19;19;19;19;19;19;19;18;18;18;17;17;17;17;17;14;8;2;2;1	19;19;19;19;19;19;19;18;18;18;17;17;17;17;17;14;8;2;2;1	19;19;19;19;19;19;19;18;18;18;17;17;17;17;17;14;8;2;2;1	191410000	206260000	179360000	Fibronectin;Anastellin;Ugl-Y1;Ugl-Y2;Ugl-Y3	FN1	;;;;;;;;;;;;;;;	20	19	19	19	12	11	10	12	11	10	12	11	10	13.7	13.7	13.7	243.23	2211	2211;2211;2330;2355;2386;2446;2477;2031;2184;2386;2176;2240;2265;2267;2296;2008;1103;642;657;241	1	160	0	61.88	9.2	7.7	6.9	197940000	201350000	207820000	178550000	7	8	5	76
F8W7Q4;Q96A26;E9PH05	F8W7Q4;Q96A26;E9PH05	4;4;3	4;4;3	4;4;3	169190000	176140000	156730000	Protein FAM162A	FAM162A	;;	3	4	4	4	3	3	3	3	3	3	3	3	3	25	25	25	16.515	144	144;154;141	1	43	0	24.764	24.3	24.3	20.1	111460000	197210000	214760000	152750000	4	3	2	35
F8W8J4;Q9NZM1-6;Q9NZM1;Q9NZM1-2;Q9NZM1-5	F8W8J4;Q9NZM1-6;Q9NZM1;Q9NZM1-2;Q9NZM1-5	94;94;94;87;68	94;94;94;87;68	3;3;3;3;3	5230900000	5205900000	5301600000	Myoferlin	MYOF	;;;;	5	94	94	3	80	78	77	80	78	77	3	3	2	56.8	56.8	1.8	234.65	2061	2061;2048;2061;2019;1577	1	1259	0	323.31	49.1	46.7	46.2	4941500000	5565400000	5951600000	5240900000	72	62	66	763
F8W8R3;P49005;C9JLE1;C9JHC7;C9IZD2;C9J8Z7	F8W8R3;P49005;C9JLE1;C9JHC7	5;5;3;3;1;1	5;5;3;3;1;1	5;5;3;3;1;1	47333000	37686000	30393000	DNA polymerase delta subunit 2	POLD2	;;;	6	5	5	5	3	3	2	3	3	2	3	3	2	18.2	18.2	18.2	49.612	455	455;469;220;257;148;155	1	45	0	11.745	9.9	12.1	6.4	27564000	48451000	41756000	29894000	2	2	0	16
F8W8S0;Q13409-3;Q13409-7;Q13409-2;Q13409;Q13409-6;Q13409-5;E7EQL5;E7EV09;E7ET01;E7ETL8;E7EQU2;E7ESD3;E7EMU4;E9PGG1;E7EUM4;E7ERR6;E7ERH4;E7EU01	F8W8S0;Q13409-3;Q13409-7;Q13409-2;Q13409;Q13409-6;Q13409-5;E7EQL5	17;17;17;17;17;16;16;11;8;5;5;5;5;5;3;3;3;3;2	17;17;17;17;17;16;16;11;8;5;5;5;5;5;3;3;3;3;2	17;17;17;17;17;16;16;11;8;5;5;5;5;5;3;3;3;3;2	592960000	617940000	608210000	Cytoplasmic dynein 1 intermediate chain 2	DYNC1I2	;;;;;;;	19	17	17	17	16	14	11	16	14	11	16	14	11	41.7	41.7	41.7	71.349	638	638;612;630;632;638;611;637;305;250;173;184;185;187;214;110;137;139;151;121	1	230	0	115.07	41.5	33.9	24.5	587320000	652130000	793340000	560300000	17	11	9	133
F8W8S3;H0YKT5;H0YKN8;H0YL70;Q04726-2;Q04726-7;Q04726-3;Q04726-6;Q04726-5;Q04726-4;Q04726;F5H7D6;H0YNT2;H0YNI7;H0YLI3;B3KQ29;H0YKH0;H0YLW9;G8JLG4;F8W9R0;Q04727-2;Q04727-4;Q04727;Q04727-3;B4DE62;K7EMK7;Q04725-2;Q04725;K7EJR7;Q04725-3	F8W8S3;H0YKT5;H0YKN8;H0YL70;Q04726-2;Q04726-7;Q04726-3;Q04726-6;Q04726-5;Q04726-4;Q04726;F5H7D6;H0YNT2;H0YNI7;H0YLI3	7;7;7;7;7;7;7;7;7;7;7;6;6;5;4;3;3;3;3;3;3;3;3;3;2;2;2;2;1;1	7;7;7;7;7;7;7;7;7;7;7;6;6;5;4;3;3;3;3;3;3;3;3;3;2;2;2;2;1;1	4;4;4;4;4;4;4;4;4;4;4;3;3;2;4;0;3;3;0;0;0;0;0;0;0;0;0;0;0;0	93429000	83862000	76242000	Transducin-like enhancer protein 3	TLE3	;;;;;;;;;;;;;;	30	7	7	4	5	5	3	5	5	3	4	4	2	14.5	14.5	9	82.611	764	764;774;778;782;760;762;764;767;769;772;772;699;716;353;611;410;445;448;704;805;704;748;773;805;410;744;621;743;280;706	1	57	0	9.8305	10.5	10.5	4.2	95945000	116910000	77137000	45655000	3	2	1	23
F8W8Z9;Q8N4H5;Q8N4H5-3;Q8N4H5-2;H3BUX3;H0YFG9	F8W8Z9;Q8N4H5;Q8N4H5-3;Q8N4H5-2	5;5;5;5;2;2	5;5;5;5;2;2	5;5;5;5;2;2	253490000	312080000	258110000	Mitochondrial import receptor subunit TOM5 homolog	TOMM5	;;;	6	5	5	5	4	5	4	4	5	4	4	5	4	35.7	35.7	35.7	10.976	98	98;51;85;92;64;71	1	52	0	6.8785	27.6	35.7	33.7	209320000	275950000	397310000	255880000	3	5	2	34
F8W998;H9KV37;O14936-3;O14936-4;O14936-6;O14936-2;O14936;Q5JS79;Q5JS72;Q5JS74;O14936-5	F8W998;H9KV37;O14936-3;O14936-4;O14936-6;O14936-2;O14936;Q5JS79;Q5JS72;Q5JS74;O14936-5	4;4;4;4;4;4;4;2;2;2;2	4;4;4;4;4;4;4;2;2;2;2	4;4;4;4;4;4;4;2;2;2;2	33324000	53547000	56598000	Peripheral plasma membrane protein CASK	CASK	;;;;;;;;;;	11	4	4	4	3	3	3	3	3	3	3	3	3	6.6	6.6	6.6	103.28	909	909;921;897;898;909;921;926;381;518;590;518	1	33	0	15.667	5.5	4.4	4.4	48913000	35149000	58139000	64221000	1	2	1	17
F8W9U3;Q96IU4;B4DQI4;Q96IU4-2	F8W9U3;Q96IU4;B4DQI4	7;7;6;2	7;7;6;2	7;7;6;2	241690000	220830000	261370000	Alpha/beta hydrolase domain-containing protein 14B	ABHD14B	;;	4	7	7	7	5	7	5	5	7	5	5	7	5	38.5	38.5	38.5	22.38	208	208;210;188;172	1	79	0	13.279	26.9	38.5	26.9	206780000	271020000	259910000	226800000	3	3	2	38
F8W9X7;Q567U6;H7C050	F8W9X7;Q567U6	8;8;1	8;8;1	8;8;1	43230000	58016000	56236000	Coiled-coil domain-containing protein 93	CCDC93	;	3	8	8	8	5	5	4	5	5	4	5	5	4	15.2	15.2	15.2	73.041	630	630;631;91	1	53	0	13.822	8.6	9.4	6.5	61172000	45076000	77507000	60188000	4	0	1	22
F8WA11;Q7Z460-2;Q7Z460-4;F5GWS0;Q7Z460-3;Q7Z460;F5H2E2;F5GWM7;H0Y5T1;C9J151	F8WA11;Q7Z460-2;Q7Z460-4;F5GWS0;Q7Z460-3;Q7Z460;F5H2E2;F5GWM7	11;11;11;11;11;11;8;8;3;1	7;7;7;7;7;7;4;4;1;1	7;7;7;7;7;7;4;4;1;1	43059000	39889000	0	CLIP-associating protein 1	CLASP1	;;;;;;;	10	11	7	7	9	9	3	5	5	2	5	5	2	9.4	6.8	6.8	164.49	1494	1494;1471;1477;1478;1494;1538;1245;1255;704;150	1	50	0	17.399	7.7	7.3	2.7	26180000	70666000	55199000	38092000	2	3	0	22
F8WAJ0;Q9H8H2;Q9H8H2-2;Q9H8H2-4;B4E3G7;Q9H8H2-3	F8WAJ0;Q9H8H2;Q9H8H2-2;Q9H8H2-4	4;4;3;2;1;1	4;4;3;2;1;1	4;4;3;2;1;1	0	0	43704000	Probable ATP-dependent RNA helicase DDX31	DDX31	;;;	6	4	4	4	2	2	2	2	2	2	2	2	2	6.8	6.8	6.8	80.945	722	722;851;778;585;160;319	1	22	0	3.8697	3.3	3.3	3.5	8181800	37137000	11466000	19812000	1	0	2	8
F8WAS3;Q16718;C9IZN5;H7BYD0;Q16718-2	F8WAS3;Q16718;C9IZN5;H7BYD0;Q16718-2	4;4;3;3;3	4;4;3;3;3	4;4;3;3;3	111290000	99559000	92680000	NADH dehydrogenase [ubiquinone] 1 alpha subcomplex subunit 5	NDUFA5	;;;;	5	4	4	4	3	4	4	3	4	4	3	4	4	51.4	51.4	51.4	7.8423	70	70;116;93;112;116	1	54	0	12.176	37.1	51.4	51.4	125150000	96579000	135350000	107810000	2	3	4	28
F8WCF6;P59998;P59998-3;F8WDD7;P59998-2;H7C0A3;R4GN08;P59998-4;F8WE39;F8WDW3	F8WCF6;P59998;P59998-3;F8WDD7;P59998-2;H7C0A3	11;11;10;7;7;6;5;5;3;2	11;11;10;7;7;6;5;5;3;2	11;11;10;7;7;6;5;5;3;2	1378500000	1562000000	1702400000	Actin-related protein 2/3 complex subunit 4	ARPC4-TTLL3;ARPC4	;;;;;	10	11	11	11	11	10	10	11	10	10	11	10	10	70.7	70.7	70.7	21.058	181	181;168;187;113;625;167;77;78;47;44	1	163	0	118.3	70.7	59.7	59.7	1374600000	1575600000	1574000000	1690600000	12	6	7	98
F8WCP6;Q7Z4S6-6;Q7Z4S6-3;Q7Z4S6-5;Q7Z4S6-2;Q7Z4S6;Q7Z4S6-4;H0YIM7;H0YI78;H0YHT2;Q2M1P5;O75037-3;O75037-4;O75037-2;O75037	F8WCP6;Q7Z4S6-6;Q7Z4S6-3;Q7Z4S6-5;Q7Z4S6-2;Q7Z4S6;Q7Z4S6-4;H0YIM7	6;6;6;6;6;6;6;3;1;1;1;1;1;1;1	6;6;6;6;6;6;6;3;1;1;1;1;1;1;1	5;5;5;5;5;5;5;2;1;1;0;0;0;0;0	51142000	54391000	64301000	Kinesin-like protein KIF21A;Kinesin-like protein	KIF21A	;;;;;;;	15	6	6	5	4	5	4	4	5	4	3	4	3	5.7	5.7	5	187.46	1675	1675;1621;1627;1637;1661;1674;1675;290;655;975;1343;1610;1623;1624;1637	1	38	0	7.5608	4	3.9	4	16235000	40890000	58077000	79713000	3	2	1	15
F8WCX5;Q9BY77;B4DMM2;Q9BY77-2;Q6R954;F8WEE2	F8WCX5;Q9BY77;B4DMM2;Q9BY77-2	3;3;2;2;1;1	3;3;2;2;1;1	3;3;2;2;1;1	0	28390000	0	Polymerase delta-interacting protein 3	POLDIP3	;;;	6	3	3	3	2	3	1	2	3	1	2	3	1	14.2	14.2	14.2	30.769	281	281;421;186;392;185;189	1	10	0.00025733	3.0214	10.7	14.2	4.6	0	17915000	30059000	18525000	0	0	0	2
F8WJN3;Q16630-3;Q16630;Q16630-2;F8W084	F8WJN3;Q16630-3;Q16630;Q16630-2	14;14;14;14;2	14;14;14;14;2	14;14;14;14;2	459670000	488470000	454530000	Cleavage and polyadenylation specificity factor subunit 6	CPSF6	;;;	5	14	14	14	10	10	9	10	10	9	10	10	9	35.4	35.4	35.4	52.269	478	478;478;551;588;107	1	129	0	188.9	22.4	23.4	20.7	474330000	584930000	352610000	433150000	9	3	2	63
G3V0I5;P49821-2;P49821;E9PQP1;B4DE93;E9PMX3;E9PJL9;E9PLC6;E9PPR0;E9PPS5;E9PPD6;H0YD04;H0YE81	G3V0I5;P49821-2;P49821;E9PQP1;B4DE93;E9PMX3	7;7;7;5;5;4;3;3;3;2;1;1;1	7;7;7;5;5;4;3;3;3;2;1;1;1	7;7;7;5;5;4;3;3;3;2;1;1;1	76940000	79347000	48838000	NADH dehydrogenase [ubiquinone] flavoprotein 1, mitochondrial	NDUFV1	;;;;;	13	7	7	7	4	3	6	4	3	6	4	3	6	20.4	20.4	20.4	50.054	457	457;455;464;178;363;178;95;136;144;75;52;127;133	1	55	0	14.941	9	7.2	14.4	75476000	69854000	72722000	58813000	1	2	2	18
G3V126;Q9UI12-2;Q9UI12;E5RG49;E5RHH0	G3V126;Q9UI12-2;Q9UI12	8;8;8;2;2	8;8;8;2;2	8;8;8;2;2	127070000	128680000	118660000	V-type proton ATPase subunit H	ATP6V1H	;;	5	8	8	8	5	4	6	5	4	6	5	4	6	28.2	28.2	28.2	51.57	443	443;465;483;101;102	1	66	0	40.63	18.1	13.5	20.3	140640000	146240000	121500000	137970000	4	3	4	37
G3V1D3;G3V180;Q9NY33-4;Q9NY33;E9PQ14;Q9NY33-2;E9PKK8;E9PPK9;E9PNX5;E9PQF2	G3V1D3;G3V180;Q9NY33-4;Q9NY33	23;23;23;23;9;7;6;6;4;2	23;23;23;23;9;7;6;6;4;2	23;23;23;23;9;7;6;6;4;2	772010000	876980000	815600000	Dipeptidyl peptidase 3	DPP3	;;;	10	23	23	23	18	19	15	18	19	15	18	19	15	42.3	42.3	42.3	84.304	756	756;757;707;737;177;317;170;201;104;90	1	265	0	112.47	32.3	36.9	28.3	751140000	800800000	888820000	714770000	15	12	10	154
G3V1E1;E9PQT3;E7EWE2;G3XAB5;P17405-3;P17405-2;P17405-4;P17405;E9PL59;E9PPK6;H0YEP5	G3V1E1;E9PQT3;E7EWE2;G3XAB5;P17405-3;P17405-2;P17405-4;P17405;E9PL59;E9PPK6;H0YEP5	2;2;2;2;2;2;2;2;1;1;1	2;2;2;2;2;2;2;2;1;1;1	2;2;2;2;2;2;2;2;1;1;1	0	0	20825000	Sphingomyelin phosphodiesterase	SMPD1	;;;;;;;;;;	11	2	2	2	1	1	2	1	1	2	1	1	2	5.7	5.7	5.7	39.842	366	366;402;575;587;573;585;628;629;52;171;317	1	15	0.00026295	3.3328	3	2.7	5.7	12737000	5260600	16997000	20521000	0	0	1	6
G3V1K3;J3QT77;Q15165-3;Q15165-1;Q15165;G3XAK4	G3V1K3;J3QT77;Q15165-3;Q15165-1;Q15165;G3XAK4	12;11;11;11;11;7	12;11;11;11;11;7	12;11;11;11;11;7	803930000	686930000	800360000	Serum paraoxonase/arylesterase 2	PON2	;;;;;	6	12	12	12	9	10	9	9	10	9	9	10	9	48.3	48.3	48.3	41.527	375	375;342;342;354;354;219	1	194	0	124.46	37.3	42.4	37.3	718770000	775870000	821470000	799260000	13	14	9	140
G3V1S1;P19447	G3V1S1;P19447	2;2	2;2	2;2	339700000	0	0	TFIIH basal transcription factor complex helicase XPB subunit	ERCC3	;	2	2	2	2	2	2	2	2	2	2	2	2	2	4	4	4	81.983	718	718;782	1	24	0.00025786	3.0581	4	4	4	364660000	427600000	446070000	475210000	1	0	0	3
G3V2F7;Q13404-1;Q13404;Q13404-7;Q13404-2;Q13404-8;Q13404-6	G3V2F7;Q13404-1;Q13404;Q13404-7;Q13404-2;Q13404-8;Q13404-6	10;9;8;8;8;6;5	10;9;8;8;8;6;5	3;3;3;3;3;1;3	1002300000	903180000	1053700000	Ubiquitin-conjugating enzyme E2 variant 1	UBE2V1	;;;;;;	7	10	10	3	7	10	8	7	10	8	1	3	2	31.9	31.9	10	42.208	370	370;221;147;170;170;105;103	1	131	0	27.538	23	31.9	24.6	1001500000	1020700000	1074200000	1128600000	3	7	4	61
G3V2Q1;P07910;G3V576;G3V555;G3V575	G3V2Q1;P07910;G3V576;G3V555;G3V575	12;12;10;8;8	1;1;1;1;1	1;1;1;1;1	7913700	0	0	Heterogeneous nuclear ribonucleoproteins C1/C2	HNRNPC	;;;;	5	12	1	1	10	11	10	1	0	0	1	0	0	45.9	10.2	10.2	33.57	305	305;306;231;175;187	1	2	0.0012614	2.7558	40.3	35.7	33.4	0	8616100	0	0	1	0	0	2
G3V3G9;Q5TAQ9;H0YDY4;V9GY54;Q5TAQ9-2	G3V3G9;Q5TAQ9	3;2;1;1;1	2;2;0;1;1	2;2;0;1;1	36063000	0	42692000	DDB1- and CUL4-associated factor 8	DCAF8	;	5	3	2	2	3	2	3	2	1	2	2	1	2	4.5	3.2	3.2	84.752	751	751;597;119;417;273	1	20	0	5.1434	4.5	3.5	4.5	40141000	38637000	29347000	46397000	1	1	1	14
G3V4F2;Q86TX2;P49753;B3KSA0;P49753-2	G3V4F2;Q86TX2;P49753;B3KSA0;P49753-2	8;8;7;4;4	8;8;7;4;4	8;8;7;4;4	352710000	339060000	291840000	Acyl-coenzyme A thioesterase 1;Acyl-coenzyme A thioesterase 2, mitochondrial	ACOT1;ACOT2	;;;;	5	8	8	8	5	4	6	5	4	6	5	4	6	28.9	28.9	28.9	43.733	395	395;421;483;286;301	1	53	0	23.447	14.7	14.9	19.7	316970000	351280000	135170000	299440000	1	2	3	16
G3V4W0;B4DY08;G3V4C1;P07910-2;P07910-4;G3V2D6;P07910-3;G3V5X6;G3V3K6;G3V251;G3V5V7;B4DSU6;G3V4M8;O60812;G3V2H6;E5RG71;B3KT61;Q86SE5;Q86SE5-3	G3V4W0;B4DY08;G3V4C1;P07910-2;P07910-4;G3V2D6;P07910-3;G3V5X6;G3V3K6;G3V251;G3V5V7	12;12;12;12;11;7;7;6;6;6;6;5;4;4;3;1;1;1;1	12;12;12;12;11;7;7;6;6;6;6;5;4;4;3;1;1;1;1	1;1;1;1;1;1;0;1;1;1;0;0;0;0;0;0;0;0;0	868730000	787300000	755050000	Heterogeneous nuclear ribonucleoproteins C1/C2	HNRNPC	;;;;;;;;;;	19	12	12	1	10	12	11	10	12	11	1	1	1	48.5	48.5	6.9	28.916	262	262;288;292;293;250;214;226;117;121;126;180;147;66;293;54;85;280;291;304	1	192	0	55.563	42	48.5	45.8	958040000	866720000	864040000	910530000	8	9	11	111
G3V529;Q9GZR7-2;Q9GZR7;F5GYL3	G3V529;Q9GZR7-2;Q9GZR7;F5GYL3	7;7;7;5	7;7;7;5	7;7;7;5	69525000	81224000	59819000	ATP-dependent RNA helicase DDX24	DDX24	;;;	4	7	7	7	6	5	5	6	5	5	6	5	5	10.7	10.7	10.7	91.48	816	816;804;859;609	1	64	0	10.955	8.8	7.6	7.5	45284000	107870000	76973000	78495000	1	2	0	17
G3V572;G3V3R9;G3V3Y4;G3V256;Q6PJT7-4;Q6PJT7-3;Q6PJT7-5;Q6PJT7-9;Q6PJT7-2;Q6PJT7;Q6PJT7-11;G3V473;G3V240;Q6PJT7-10;H0YJA2;G3V2X4	G3V572;G3V3R9;G3V3Y4;G3V256;Q6PJT7-4;Q6PJT7-3;Q6PJT7-5;Q6PJT7-9;Q6PJT7-2;Q6PJT7;Q6PJT7-11;G3V473;G3V240;Q6PJT7-10	5;5;5;5;5;5;5;5;5;5;4;3;3;3;2;1	5;5;5;5;5;5;5;5;5;5;4;3;3;3;2;1	5;5;5;5;5;5;5;5;5;5;4;3;3;3;2;1	9960800	26509000	0	Zinc finger CCCH domain-containing protein 14	ZC3H14	;;;;;;;;;;;;;	16	5	5	5	3	3	1	3	3	1	3	3	1	47.7	47.7	47.7	14.68	132	132;209;215;605;571;579;711;730;735;736;585;72;94;543;651;64	1	32	0	6.412	22	26.5	6.8	19824000	12438000	30188000	4047900	1	0	0	9
G3V599;O15320-9;O15320-8;O15320-6;O15320-7;O15320-2;O15320-4;O15320-3;O15320-10;O15320;O15320-5	G3V599;O15320-9;O15320-8;O15320-6;O15320-7;O15320-2;O15320-4;O15320-3;O15320-10;O15320;O15320-5	3;3;3;3;3;3;3;3;3;3;3	3;3;3;3;3;3;3;3;3;3;3	3;3;3;3;3;3;3;3;3;3;3	0	48112000	40088000	cTAGE family member 5	CTAGE5	;;;;;;;;;;	11	3	3	3	2	3	3	2	3	3	2	3	3	4.2	4.2	4.2	151.72	1339	1339;672;724;729;732;761;771;775;792;804;809	1	28	0	4.3604	2.5	4.2	4.2	35770000	41041000	76232000	50902000	0	2	0	8
G3V5T9;P24941-2;P24941;E7ESI2;Q00526;K7EJ83	G3V5T9;P24941-2;P24941;E7ESI2	12;12;12;10;3;2	10;10;10;8;1;1	10;10;10;8;1;1	245650000	240000000	255610000	Cyclin-dependent kinase 2	CDK2	;;;	6	12	10	10	11	9	9	9	7	7	9	7	7	45.7	40.2	40.2	39.178	346	346;264;298;238;305;213	1	112	0	62.867	41.6	29.8	31.5	210820000	275000000	219120000	225630000	4	5	5	51
G3V5V3;O60524-4;O60524-5;O60524-3;O60524;G3V547;G3V4D9;O60524-2	G3V5V3;O60524-4;O60524-5;O60524-3;O60524	7;7;7;7;7;2;2;1	7;7;7;7;7;2;2;1	7;7;7;7;7;2;2;1	48203000	43320000	51992000	Nuclear export mediator factor NEMF	NEMF	;;;;	8	7	7	7	4	5	6	4	5	6	4	5	6	8.1	8.1	8.1	113.95	998	998;1034;1051;1055;1076;121;178;276	1	56	0	6.6226	5	6.1	6.7	16667000	47632000	52602000	58426000	2	1	2	17
G3V5Z7;P60900;G3V295;P60900-2;G3V3I1;G3V3U4;P60900-3;H0YJC4;G3V4S5;G3V2S7	G3V5Z7;P60900;G3V295;P60900-2;G3V3I1	15;15;13;12;11;7;7;3;2;2	15;15;13;12;11;7;7;3;2;2	15;15;13;12;11;7;7;3;2;2	2710300000	2951800000	2767400000	Proteasome subunit alpha type;Proteasome subunit alpha type-6	PSMA6	;;;;	10	15	15	15	15	14	14	15	14	14	15	14	14	60.7	60.7	60.7	28.147	252	252;246;203;227;148;107;167;85;41;67	1	247	0	246.71	60.7	59.9	60.7	2452000000	3055100000	3092600000	2896700000	14	16	14	180
G3XAB3;Q96AE7	G3XAB3;Q96AE7	3;2	3;2	3;2	17469000	0	17930000	Tetratricopeptide repeat protein 17	TTC17	;	2	3	3	3	2	2	2	2	2	2	2	2	2	4.5	4.5	4.5	108.61	956	956;1141	1	22	0	4.1513	2.9	2.9	2.9	3335500	25364000	16364000	24982000	1	0	0	4
G3XAI2;P07942;E7EPA6	G3XAI2;P07942;E7EPA6	12;12;6	12;12;6	12;12;6	154510000	157160000	147620000	Laminin subunit beta-1	LAMB1	;;	3	12	12	12	8	12	9	8	12	9	8	12	9	9.3	9.3	9.3	200.48	1810	1810;1786;850	1	111	0	45.082	6.8	9.3	7.4	148480000	160270000	224710000	169020000	3	6	4	57
G3XAN4;B4E0K2;Q15629	G3XAN4;B4E0K2;Q15629	6;6;6	6;6;6	6;6;6	163220000	172940000	177030000	Translocating chain-associated membrane protein 1	TRAM1	;;	3	6	6	6	4	5	5	4	5	5	4	5	5	25	25	25	33.435	288	288;343;374	1	65	0	33.017	15.3	18.1	18.1	223740000	162870000	204130000	141340000	3	1	3	32
G5E994;Q5VW38-2;Q5VW38;U3KQD2;Q5VW38-3	G5E994;Q5VW38-2;Q5VW38;U3KQD2;Q5VW38-3	2;2;2;1;1	2;2;2;1;1	2;2;2;1;1	0	32067000	0	Protein GPR107	GPR107	;;;;	5	2	2	2	1	2	1	1	2	1	1	2	1	3.7	3.7	3.7	63.984	571	571;552;600;128;300	1	18	0	4.7493	1.8	3.7	1.9	6359500	8034300	33187000	36735000	0	2	0	9
G5E9E7;G3V1L9;Q07157-2;Q07157;H0YKB1;H0Y3R8;H0YLT6	G5E9E7;G3V1L9;Q07157-2;Q07157	14;14;14;14;4;1;1	14;14;14;14;4;1;1	14;14;14;14;4;1;1	133890000	122340000	129550000	Tight junction protein ZO-1	TJP1	;;;	7	14	14	14	11	13	12	11	13	12	11	13	12	9.9	9.9	9.9	189.67	1692	1692;1768;1668;1748;383;227;231	1	130	0	17.466	7.9	9.2	8.6	101340000	152500000	150380000	133990000	5	5	3	45
G5E9I3;F5H7K1;E7EWW0;Q7Z3J2;C9J7I2;Q7Z3J2-2;H3BV68;H3BVG8;H3BUS7;H3BTI5;H3BNX2;F6S1J4	G5E9I3;F5H7K1;E7EWW0;Q7Z3J2;C9J7I2;Q7Z3J2-2;H3BV68	12;12;12;12;10;10;9;5;2;1;1;1	12;12;12;12;10;10;9;5;2;1;1;1	12;12;12;12;10;10;9;5;2;1;1;1	123380000	114480000	116470000	UPF0505 protein C16orf62	C16orf62	;;;;;;	12	12	12	12	10	7	4	10	7	4	10	7	4	18.7	18.7	18.7	98.889	870	870;959;1052;963;813;813;712;453;116;73;170;273	1	102	0	30.074	16.4	11.4	7	63931000	170590000	90238000	105890000	5	3	1	37
G5E9S8;G3V2E7;F8W6L3;G3V3H3;G3V5R9;E7EVH7;Q07866-8;Q07866-2;Q07866-3;Q07866;Q07866-7;Q07866-5;Q07866-10;Q07866-6;Q07866-4;Q07866-9;G3V2P7;H0YJU9;H0YJL0;H0YJT3;H0YG16;H0YGB8	G5E9S8;G3V2E7;F8W6L3;G3V3H3;G3V5R9;E7EVH7;Q07866-8;Q07866-2;Q07866-3;Q07866;Q07866-7;Q07866-5;Q07866-10;Q07866-6;Q07866-4;Q07866-9	17;17;17;17;17;17;17;17;17;17;17;17;17;17;17;17;7;3;3;3;3;1	17;17;17;17;17;17;17;17;17;17;17;17;17;17;17;17;7;3;3;3;3;1	13;13;13;13;13;13;13;13;13;13;13;13;13;13;13;13;6;3;3;3;3;1	300870000	270800000	266650000	Kinesin light chain 1	KLC1	;;;;;;;;;;;;;;;	22	17	17	13	12	10	10	12	10	10	9	8	9	35	35	25.7	62.506	549	549;551;576;609;630;732;551;560;564;573;584;616;618;628;637;639;150;131;150;161;268;60	1	164	0	41.816	26.2	21.9	20.6	263170000	379340000	343990000	269440000	6	5	6	73
G5E9W2;Q9P2E5;Q9P2E5-2;C9JZF7	G5E9W2;Q9P2E5;Q9P2E5-2	7;7;4;1	7;7;4;1	7;7;4;1	27720000	40610000	42201000	Chondroitin sulfate glucuronyltransferase	CHPF2	;;	4	7	7	7	4	4	5	4	4	5	4	4	5	11	11	11	85.146	764	764;772;666;90	1	49	0	7.4021	6.2	5.5	6.8	35516000	29676000	35060000	49391000	2	2	2	21
G5E9W7;G5E9V5;P82650;H7C5F2;H7C5H3;Q9H3I1;C9J5D8	G5E9W7;G5E9V5;P82650;H7C5F2;H7C5H3;Q9H3I1	8;8;8;4;4;4;1	8;8;8;4;4;4;1	8;8;8;4;4;4;1	67297000	71732000	81687000	28S ribosomal protein S22, mitochondrial	MRPS22	;;;;;	7	8	8	8	5	5	3	5	5	3	5	5	3	38.6	38.6	38.6	36.805	319	319;359;360;165;200;168;51	1	56	0	21.448	28.5	27	14.7	77812000	64346000	115860000	55579000	2	2	1	21
G5EA30;Q92879-5;Q92879-2;Q92879-3;Q92879-6;Q92879;Q92879-4;E9PSH0;E9PQK4;E9PKU1;E9PKA1;F5H4Y5;F5H0D8;B4DIB6;V9GYD9;Q5VZZ6;E9PC62;O95319-5;O95319-2;O95319;O95319-4;O95319-3	G5EA30;Q92879-5;Q92879-2;Q92879-3;Q92879-6;Q92879;Q92879-4	12;12;12;12;12;12;12;5;4;4;2;2;2;1;1;1;1;1;1;1;1;1	12;12;12;12;12;12;12;5;4;4;2;2;2;1;1;1;1;1;1;1;1;1	12;12;12;12;12;12;12;5;4;4;2;2;2;1;1;1;1;1;1;1;1;1	395930000	535190000	410410000	CUGBP Elav-like family member 1	CELF1	;;;;;;	22	12	12	12	12	10	10	12	10	10	12	10	10	23.3	23.3	23.3	55.142	514	514;468;482;483;485;486;512;95;87;114;56;78;103;403;440;502;521;488;490;508;509;521	1	169	0	44.168	23.3	19.3	19.3	564070000	504860000	433960000	398000000	11	5	3	70
G5EA36;P30260;P30260-2;B4DL80;I3L394;I3L2Z8;I3L328;I3L3H6;F6QPS0	G5EA36;P30260;P30260-2;B4DL80;I3L394	6;6;6;5;3;1;1;1;1	6;6;6;5;3;1;1;1;1	6;6;6;5;3;1;1;1;1	35337000	33339000	43758000	Cell division cycle protein 27 homolog	CDC27	;;;;	9	6	6	6	3	5	4	3	5	4	3	5	4	7.2	7.2	7.2	91.737	823	823;824;830;763;163;86;113;233;343	1	55	0	5.7074	3.6	6	4.9	26641000	40265000	34647000	41339000	1	1	2	18
G5EA52;P30101	G5EA52;P30101	38;38	37;37	31;31	17487000000	16085000000	16570000000	Protein disulfide-isomerase A3	PDIA3	;	2	38	37	31	35	35	35	35	35	35	29	29	29	72.8	72.8	61.9	54.963	485	485;505	1	720	0	323.31	69.7	69.5	69.7	14445000000	18814000000	19661000000	15492000000	54	40	46	569
G8JLB6;P31943;E9PCY7;D6RBM0;D6RIT2;D6RIU0;D6RAM1;D6R9T0;D6RFM3;E7EN40;D6RDU3;D6RJ04;D6RIH9;H0YB39;E7EQJ0;E5RGV0;H0YBD7;D6RDL0;H0YBG7;D6RF17;E5RGH4;H0YAQ2;F5GZT4;D6R9D3;E5RJ94	G8JLB6;P31943;E9PCY7;D6RBM0;D6RIT2;D6RIU0;D6RAM1;D6R9T0;D6RFM3;E7EN40;D6RDU3;D6RJ04;D6RIH9;H0YB39	20;20;19;13;11;11;10;10;10;10;10;10;10;10;9;9;8;7;5;4;4;4;4;3;2	20;20;19;13;11;11;10;10;10;10;10;10;10;10;9;9;8;7;5;4;4;4;4;3;2	11;11;10;7;8;7;7;7;7;6;7;7;7;4;7;4;3;6;2;4;1;1;2;3;2	4836300000	4617000000	4436700000	Heterogeneous nuclear ribonucleoprotein H;Heterogeneous nuclear ribonucleoprotein H, N-terminally processed	HNRNPH1	;;;;;;;;;;;;;	25	20	20	11	20	17	18	20	17	18	11	8	10	52.8	52.8	32.2	51.229	472	472;449;429;212;164;168;130;161;163;166;171;172;184;277;115;155;194;84;185;49;100;131;159;40;28	1	441	0	323.31	52.8	50	50.8	5128300000	5574500000	4939900000	5052200000	32	26	29	333
H0Y4G9;Q99836-5;Q99836;Q99836-6;Q99836-2;Q99836-3;Q99836-4	H0Y4G9;Q99836-5;Q99836;Q99836-6;Q99836-2	8;8;8;8;6;3;2	8;8;8;8;6;3;2	8;8;8;8;6;3;2	81538000	89182000	99122000	Myeloid differentiation primary response protein MyD88	MYD88	;;;;	7	8	8	8	6	5	6	6	5	6	6	5	6	32.3	32.3	32.3	35.312	316	316;275;296;304;251;191;146	1	81	0	16.244	25.6	23.1	24.1	108010000	93439000	92513000	108610000	1	2	3	31
H0Y4W2;F2Z2U4;Q9Y4A5-2;Q9Y4A5	H0Y4W2;F2Z2U4;Q9Y4A5-2;Q9Y4A5	6;6;6;6	6;6;6;6	6;6;6;6	154300000	0	157800000	Transformation/transcription domain-associated protein	TRRAP	;;;	4	6	6	6	5	3	4	5	3	4	5	3	4	2.3	2.3	2.3	405.8	3588	3588;3848;3830;3859	1	39	0.00027152	3.7585	2	1.3	1.3	43999000	289540000	191740000	95542000	1	1	1	5
H0Y612;Q9UPN9-2;Q9UPN9;E7EN20	H0Y612;Q9UPN9-2;Q9UPN9	6;6;6;2	6;6;6;2	6;6;6;2	50387000	62623000	54704000	E3 ubiquitin-protein ligase TRIM33	TRIM33	;;	4	6	6	6	3	4	4	3	4	4	3	4	4	7.5	7.5	7.5	98.891	888	888;1110;1127;759	1	42	0	24.059	3.5	4.7	6.1	66694000	38856000	54454000	79788000	0	4	1	16
H0Y621;H7BXI5;H0Y5K5;E9PFA8;Q9Y282-2;Q9Y282;Q9Y282-3;A6PVJ2	H0Y621;H7BXI5;H0Y5K5;E9PFA8;Q9Y282-2;Q9Y282;Q9Y282-3	4;4;4;4;4;4;4;1	4;4;4;4;4;4;4;1	4;4;4;4;4;4;4;1	123340000	106630000	0	Endoplasmic reticulum-Golgi intermediate compartment protein 3	ERGIC3	;;;;;;	8	4	4	4	3	3	2	3	3	2	3	3	2	16	16	16	36.851	326	326;388;397;398;230;383;388;118	1	33	0	9.8414	11.3	11.3	7.1	82487000	134280000	126470000	51544000	1	2	0	13
H0Y626;O95361;B3KP96;K7ENN8;J3KPT5;O95361-2;J3QKY5;K7EL43;I3L1X9;I3L3K9;I3L2F3;Q309B1;J3QL38	H0Y626;O95361;B3KP96;K7ENN8;J3KPT5;O95361-2	7;7;6;4;4;4;3;3;2;2;2;2;1	7;7;6;4;4;4;3;3;2;2;2;2;1	7;7;6;4;4;4;3;3;2;2;2;2;1	159290000	169070000	215520000	Tripartite motif-containing protein 16	TRIM16	;;;;;	13	7	7	7	5	6	5	5	6	5	5	6	5	9.4	9.4	9.4	107.97	953	953;564;434;232;402;348;115;184;115;224;232;348;96	1	84	0	37.776	6.1	9.3	7.6	197770000	178970000	201190000	208880000	4	0	1	31
H0Y6C3;Q53H96;B5MD87;F8WEI0	H0Y6C3;Q53H96;B5MD87	5;5;3;1	5;5;3;1	5;5;3;1	73646000	85291000	108130000	Pyrroline-5-carboxylate reductase 3	PYCRL	;;	4	5	5	5	4	4	3	4	4	3	4	4	3	27.6	27.6	27.6	27.138	261	261;274;137;44	1	50	0	21.457	23.4	23.4	18.4	83491000	104200000	91381000	86943000	4	3	2	31
H0Y6I0;Q13439-3;Q13439-4;Q13439;Q13439-5;E7EVX2	H0Y6I0;Q13439-3;Q13439-4;Q13439;Q13439-5	4;4;4;4;4;1	4;4;4;4;4;1	4;4;4;4;4;1	26049000	28502000	31223000	Golgin subfamily A member 4	GOLGA4	;;;;	6	4	4	4	3	2	4	3	2	4	3	2	4	2.5	2.5	2.5	246.6	2099	2099;2223;2228;2230;2243;445	1	30	0	14.702	1.5	1.6	2.5	18149000	18817000	25481000	38224000	2	0	3	13
H0Y7A7;P62158;E7ETZ0;E7EMB3;M0QZ52;Q96HY3;F8WBR5;G3V479;G3V361;G3V226;P27482;C9J7T9;P02585	H0Y7A7;P62158;E7ETZ0;E7EMB3;M0QZ52;Q96HY3	11;11;10;10;6;6;5;5;5;3;2;1;1	11;11;10;10;6;6;5;5;5;3;2;1;1	11;11;10;10;6;6;5;5;5;3;2;1;1	6777900000	6705000000	6876900000	Calmodulin	CALM2;CALM1;CALM3	;;;;;	13	11	11	11	11	11	11	11	11	11	11	11	11	48.1	48.1	48.1	20.762	187	187;149;150;196;83;113;65;83;98;76;149;145;160	1	246	0	323.31	48.1	48.1	48.1	6456900000	7348500000	7308500000	7049700000	16	14	14	162
H0Y818;P40692;P40692-2;P40692-3;H0Y806;B7Z821	H0Y818;P40692;P40692-2;P40692-3	4;4;2;2;1;1	4;4;2;2;1;1	4;4;2;2;1;1	26414000	0	0	DNA mismatch repair protein Mlh1	MLH1	;;;	6	4	4	4	2	1	3	2	1	3	2	1	3	10.6	10.6	10.6	75.747	679	679;756;515;658;114;460	1	24	0	23.481	6.2	3.4	8.8	9235100	24074000	20879000	27353000	1	1	1	17
H0Y8C3;Q9NZJ7-2;Q9NZJ7;Q5TDC2;B4E0C5;Q9NZJ7-3	H0Y8C3;Q9NZJ7-2;Q9NZJ7;Q5TDC2	7;7;7;5;3;2	7;7;7;5;3;2	7;7;7;5;3;2	229740000	253500000	199160000	Mitochondrial carrier homolog 1	MTCH1	;;;	6	7	7	7	7	7	5	7	7	5	7	7	5	21.3	21.3	21.3	43.121	394	394;372;389;357;254;171	1	110	0	16.103	21.3	21.3	15.7	254930000	317250000	290430000	236690000	5	6	3	48
H0Y8L3;G8JLA8;Q15582;H0YAB8;H0Y9D7;S4R3C6	H0Y8L3;G8JLA8;Q15582	3;3;3;1;1;1	3;3;3;1;1;1	3;3;3;1;1;1	24318000	27153000	0	Transforming growth factor-beta-induced protein ig-h3	TGFBI	;;	6	3	3	3	2	3	2	2	3	2	2	3	2	12.3	12.3	12.3	39.793	366	366;683;683;59;194;219	1	24	0	5.8716	7.4	12.3	8.2	7434200	24532000	30841000	15542000	1	2	0	12
H0Y8X4;O43598;O43598-2	H0Y8X4;O43598;O43598-2	6;6;3	6;6;3	6;6;3	199290000	173310000	160560000	2-deoxynucleoside 5-phosphate N-hydrolase 1	DNPH1	;;	3	6	6	6	5	3	3	5	3	3	5	3	3	28	28	28	25.868	243	243;174;148	1	58	0	35.989	24.7	17.3	17.3	293110000	168010000	103390000	98930000	2	2	2	27
H0Y9G6;E7ETU7;P09001;D6RC14;E9PF06;D6RBQ5	H0Y9G6;E7ETU7;P09001;D6RC14;E9PF06	5;5;5;4;4;1	5;5;5;4;4;1	5;5;5;4;4;1	85971000	79823000	0	39S ribosomal protein L3, mitochondrial	MRPL3	;;;;	6	5	5	5	5	5	2	5	5	2	5	5	2	17.4	17.4	17.4	40.47	363	363;375;348;155;176;28	1	47	0	9.2565	17.4	17.4	4.4	47990000	116070000	78270000	39772000	3	2	1	21
H0Y9V7;P98194-2;P98194-4;P98194;P98194-3;P98194-5;P98194-9;P98194-6;P98194-7;E7ERC6;P98194-8;H0Y8X9;D6RGE9;D6REJ1;D6RHV9;H0Y9S7	H0Y9V7;P98194-2;P98194-4;P98194;P98194-3;P98194-5;P98194-9;P98194-6;P98194-7;E7ERC6;P98194-8	7;7;7;7;7;7;7;7;7;6;6;3;1;1;1;1	7;7;7;7;7;7;7;7;7;6;6;3;1;1;1;1	7;7;7;7;7;7;7;7;7;6;6;3;1;1;1;1	26232000	0	26324000	Calcium-transporting ATPase type 2C member 1	ATP2C1	;;;;;;;;;;	16	7	7	7	2	2	3	2	2	3	2	2	3	11.1	11.1	11.1	98.938	903	903;888;903;919;923;939;949;959;973;894;944;215;82;102;120;314	1	31	0	10.294	3.2	2.9	4.3	28535000	21042000	22253000	27741000	2	1	1	10
H0YA80;P63146;H0Y9V2	H0YA80;P63146;H0Y9V2	2;2;1	1;1;1	1;1;1	0	0	43848000	Ubiquitin-conjugating enzyme E2 B	UBE2B	;;	3	2	1	1	1	2	2	0	1	1	0	1	1	26.8	12.3	12.3	15.38	138	138;152;141	1	14	0.0029169	2.359	14.5	26.8	26.8	32899000	0	31627000	44685000	0	0	0	5
H0YAN8;O15013-7;O15013-4;O15013-5;O15013;O15013-6;E9PB39;B4DTE2;Q5VXI4;Q9HCE6-5;Q9HCE6-3;Q9HCE6-2;Q9HCE6	H0YAN8;O15013-7;O15013-4;O15013-5;O15013;O15013-6;E9PB39	4;4;4;4;4;3;2;1;1;1;1;1;1	4;4;4;4;4;3;2;1;1;1;1;1;1	4;4;4;4;4;3;2;1;1;1;1;1;1	18642000	16914000	16579000	Rho guanine nucleotide exchange factor 10	ARHGEF10	;;;;;;	13	4	4	4	3	3	2	3	3	2	3	3	2	4.1	4.1	4.1	109.65	988	988;1306;1340;1344;1369;1368;610;488;1052;1067;1235;1240;1279	1	32	0	3.8086	2.4	2.4	1.5	23499000	21375000	21375000	14236000	1	0	1	11
H0YAV8;B7Z1W5;H0YBX1;E7EW18;P06746	H0YAV8;B7Z1W5;H0YBX1;E7EW18;P06746	2;2;2;2;2	2;2;2;2;2	2;2;2;2;2	15076000	0	0	DNA polymerase beta	POLB	;;;;	5	2	2	2	2	1	1	2	1	1	2	1	1	19.8	19.8	19.8	11.659	106	106;181;239;280;335	1	8	0	6.3821	19.8	10.4	10.4	0	16414000	21264000	10997000	1	0	0	2
H0YAZ3;O60504-2;O60504;H0YB51;E5RHI2;H0YBA2	H0YAZ3;O60504-2;O60504;H0YB51;E5RHI2;H0YBA2	2;2;2;1;1;1	2;2;2;1;1;1	2;2;2;1;1;1	0	27039000	0	Vinexin	SORBS3	;;;;;	6	2	2	2	2	2	1	2	2	1	2	2	1	17.7	17.7	17.7	20.442	186	186;329;671;226;260;286	1	19	0.000762	2.8582	17.7	17.7	9.1	22558000	27110000	29018000	13651000	0	1	0	3
H0YB13;O76061;E5RG57	H0YB13;O76061	3;3;1	3;3;1	3;3;1	54646000	64226000	55214000	Stanniocalcin-2	STC2	;	3	3	3	3	3	3	3	3	3	3	3	3	3	23.6	23.6	23.6	13.775	123	123;302;53	1	35	0	4.3019	23.6	23.6	23.6	65289000	60444000	72456000	56126000	0	2	2	18
H0YD13;E7EPC6;P16070-18;P16070-12;P16070-14;P16070-13;P16070-11;P16070-10;P16070-16;P16070-8;P16070-17;P16070-6;P16070-4;P16070-3;P16070-7;P16070-5;P16070;H0Y2P0;H0YE40;H0YDW7;H0YCV9;H0Y5E4;P16070-15;P16070-9;E9PKC6;H0YDX6;J3KN83;Q86UZ1;H0YD17;P16070-19	H0YD13;E7EPC6;P16070-18;P16070-12;P16070-14;P16070-13;P16070-11;P16070-10;P16070-16;P16070-8;P16070-17;P16070-6;P16070-4;P16070-3;P16070-7;P16070-5;P16070;H0Y2P0;H0YE40	10;10;10;10;10;10;10;10;10;10;10;10;10;10;10;10;10;9;6;4;4;4;4;4;3;3;3;2;2;2	10;10;10;10;10;10;10;10;10;10;10;10;10;10;10;10;10;9;6;4;4;4;4;4;3;3;3;2;2;2	10;10;10;10;10;10;10;10;10;10;10;10;10;10;10;10;10;9;6;4;4;4;4;4;3;3;3;2;2;2	4520700000	5249000000	4064700000	CD44 antigen	CD44	;;;;;;;;;;;;;;;;;;	30	10	10	10	9	10	10	9	10	10	9	10	10	47.6	47.6	47.6	22.683	206	206;714;340;361;396;425;429;493;668;674;691;699;699;711;713;734;742;287;82;240;249;294;294;675;78;181;232;80;229;139	1	215	0	62.169	42.7	47.6	47.6	5104100000	4842200000	5637800000	4795800000	11	13	10	136
H0YDJ3;F5H2U2;Q13523	H0YDJ3;F5H2U2;Q13523	4;4;4	4;4;4	4;4;4	44596000	23330000	37208000	Serine/threonine-protein kinase PRP4 homolog	PRPF4B	;;	3	4	4	4	3	3	3	3	3	3	3	3	3	9	9	9	68.4	587	587;993;1007	1	38	0	7.845	7.2	7.2	7.2	43334000	43457000	24885000	42943000	1	1	1	15
H0YDK8;E7EWT3;Q5T1Z4;Q5T1Z8;Q14671-2;Q14671-3;H0YC97;H0YDC5	H0YDK8;E7EWT3;Q5T1Z4;Q5T1Z8;Q14671-2;Q14671-3	7;7;7;7;7;7;3;1	7;7;7;7;7;7;3;1	1;1;1;1;1;1;1;0	78907000	72637000	107470000	Pumilio homolog 1	PUM1	;;;;;	8	7	7	1	4	4	4	4	4	4	1	0	0	11.2	11.2	1.9	95.696	900	900;1044;1189;1224;1162;1188;227;217	1	55	0	10.759	5.3	5.6	5.7	94688000	72035000	60821000	111500000	2	2	1	16
H0YDR3;Q8N5M4;E9PKV8	H0YDR3;Q8N5M4;E9PKV8	3;3;2	3;3;2	3;3;2	154760000	169770000	160770000	Tetratricopeptide repeat protein 9C	TTC9C	;;	3	3	3	3	3	3	3	3	3	3	3	3	3	55.1	55.1	55.1	8.1571	69	69;171;140	1	49	0	24.709	55.1	55.1	55.1	167790000	172980000	181020000	182530000	2	2	3	32
H0YDU8;P53041;A8MU39;M0R196;E7EU14	H0YDU8;P53041;A8MU39	20;20;13;1;1	20;20;13;1;1	20;20;13;1;1	1223700000	1391800000	1288100000	Serine/threonine-protein phosphatase;Serine/threonine-protein phosphatase 5	PPP5C	;;	5	20	20	20	18	17	17	18	17	17	18	17	17	49.1	49.1	49.1	55.096	485	485;499;371;125;171	1	316	0	164.09	42.7	40.2	40.6	1560300000	1155800000	1356000000	1562900000	15	17	17	174
H0YEB6;O60232;G3V1B8;H0YEK1;E9PN57;E9PK41	H0YEB6;O60232;G3V1B8	6;6;5;2;1;1	6;6;5;2;1;1	6;6;5;2;1;1	173900000	223670000	307230000	Sjoegren syndrome/scleroderma autoantigen 1	SSSCA1	;;	6	6	6	6	4	6	5	4	6	5	4	6	5	61.1	61.1	61.1	20.916	193	193;199;162;107;60;81	1	77	0	17.05	38.3	61.1	47.2	177190000	234040000	233430000	278610000	2	3	5	45
H0YEF3;E9PN81;Q8TDP1-2;Q8TDP1;H0YE52;H0YCP5;E9PKP0	H0YEF3;E9PN81;Q8TDP1-2;Q8TDP1;H0YE52;H0YCP5;E9PKP0	4;4;4;4;3;3;2	4;4;4;4;3;3;2	4;4;4;4;3;3;2	45580000	0	0	Ribonuclease H2 subunit C	RNASEH2C	;;;;;;	7	4	4	4	3	2	2	3	2	2	3	2	2	43.7	43.7	43.7	17.12	158	158;247;163;164;124;129;81	1	28	0	9.1203	31	15.8	15.8	39278000	41684000	28035000	27163000	1	0	0	6
H0YFA4;P52943;P52943-2;H0YHD8	H0YFA4;P52943;P52943-2	3;3;3;1	3;3;3;1	3;3;3;1	167430000	134690000	141820000	Cysteine-rich protein 2	CRIP2	;;	4	3	3	3	2	2	3	2	2	3	2	2	3	34.9	34.9	34.9	20.6	192	192;208;282;104	1	41	0	17.189	26.6	26.6	34.9	151640000	173620000	136480000	169020000	2	1	1	15
H0YH87;F8WB06;F8VQP2;V9GY86;Q99700-2;Q99700-4;Q99700;Q24JQ7;F8VVY6;F8VRK6;F8W0B5	H0YH87;F8WB06;F8VQP2;V9GY86;Q99700-2;Q99700-4;Q99700;Q24JQ7	6;6;6;6;6;6;6;5;1;1;1	5;5;5;5;5;5;5;4;1;1;1	5;5;5;5;5;5;5;4;1;1;1	0	46076000	53343000	Ataxin-2	ATXN2	;;;;;;;	11	6	5	5	3	5	4	3	4	3	3	4	3	8.2	7.3	7.3	98.004	916	916;1050;1073;1153;995;1243;1313;1006;184;235;285	1	43	0	6.2648	4.4	6.3	5	42478000	55439000	64805000	62936000	0	4	3	16
H0YJ47;O75843	H0YJ47;O75843	1;1	1;1	1;1	0	44195000	0	AP-1 complex subunit gamma-like 2	AP1G2	;	2	1	1	1	1	1	1	1	1	1	1	1	1	4.6	4.6	4.6	20.96	197	197;785	1	21	0.0093501	1.7	4.6	4.6	4.6	37118000	46019000	43155000	51058000	0	1	0	3
H0YJ75;Q13362-2;Q13362-3;Q13362;Q13362-4;Q13362-5;Q96B13;H0YN84;H0YJ49;H0YJU0;G3V2U3	H0YJ75;Q13362-2;Q13362-3;Q13362;Q13362-4;Q13362-5;Q96B13	9;9;9;9;9;9;7;4;2;2;2	4;4;4;4;4;4;3;2;1;1;1	4;4;4;4;4;4;3;2;1;1;1	61476000	50930000	65175000	Serine/threonine-protein phosphatase 2A 56 kDa regulatory subunit gamma isoform	PPP2R5C	;;;;;;	11	9	4	4	7	7	7	4	3	4	4	3	4	20.6	7.6	7.6	64.063	553	553;449;485;524;540;555;384;89;151;153;216	1	45	0	4.6875	15	17.2	14.1	52272000	77057000	46582000	76068000	2	0	1	9
H0YJE5;Q13572-2;Q13572;G3V588;G3V3C0;G3V5A3;G3V4M9	H0YJE5;Q13572-2;Q13572;G3V588;G3V3C0;G3V5A3;G3V4M9	2;2;2;1;1;1;1	2;2;2;1;1;1;1	2;2;2;1;1;1;1	28079000	0	0	Inositol-tetrakisphosphate 1-kinase	ITPK1	;;;;;;	7	2	2	2	2	1	0	2	1	0	2	1	0	14.8	14.8	14.8	26.359	230	230;314;414;168;181;206;295	1	12	0.00050878	2.8795	14.8	5.7	0	0	31861000	5568900	0	0	0	0	3
H0YJN8;G3V267;G3V5T0;G3V4T6;O43708-2;O43708	H0YJN8;G3V267;G3V5T0;G3V4T6;O43708-2;O43708	1;1;1;1;1;1	1;1;1;1;1;1	1;1;1;1;1;1	0	0	16084000	Maleylacetoacetate isomerase	GSTZ1	;;;;;	6	1	1	1	1	1	1	1	1	1	1	1	1	28.6	28.6	28.6	7.5454	70	70;189;202;217;161;216	1	16	0	4.246	28.6	28.6	28.6	0	20078000	0	15840000	0	1	2	6
H0YM23;O75179-6;O75179-7;O75179-2;O75179;H0YLQ3;O75179-5;O75179-3;O75179-4;H0YMS3	H0YM23;O75179-6;O75179-7;O75179-2;O75179;H0YLQ3;O75179-5;O75179-3;O75179-4	10;10;10;10;10;5;5;5;5;4	3;3;3;3;3;2;1;1;1;1	3;3;3;3;3;2;1;1;1;1	20232000	20245000	27670000	Ankyrin repeat domain-containing protein 17	ANKRD17	;;;;;;;;	10	10	3	3	8	8	7	2	3	2	2	3	2	5.6	1.4	1.4	263.25	2487	2487;2352;2490;2602;2603;862;751;1187;2010;828	1	23	0	5.5601	4.8	4.7	3.9	8951200	16050000	32742000	20896000	1	0	2	11
H0YMB0;Q00978;H0YNP4	H0YMB0;Q00978	3;3;1	3;3;1	3;3;1	0	47412000	43102000	Interferon regulatory factor 9	IRF9	;	3	3	3	3	2	2	2	2	2	2	2	2	2	8.8	8.8	8.8	38.276	353	353;393;267	1	23	0	5.7046	6.2	6.2	6.2	33927000	28857000	53837000	43299000	0	1	1	6
H0YMB3;H0YLV5;Q6PKC0;H0YNJ6;Q9P2T1;Q9P2T1-2;H0YL68;H0YKE1;H0YNS9;H0YMR9;H0YMV5;H0YLB8;H0YNH0;Q9P2T1-3	H0YMB3;H0YLV5;Q6PKC0;H0YNJ6;Q9P2T1;Q9P2T1-2;H0YL68;H0YKE1;H0YNS9;H0YMR9;H0YMV5;H0YLB8;H0YNH0;Q9P2T1-3	2;2;2;2;2;2;1;1;1;1;1;1;1;1	2;2;2;2;2;2;1;1;1;1;1;1;1;1	2;2;2;2;2;2;1;1;1;1;1;1;1;1	16887000	35091000	16285000	GMP reductase;GMP reductase 2	GMPR2	;;;;;;;;;;;;;	14	2	2	2	1	2	2	1	2	2	1	2	2	8.3	8.3	8.3	33.921	315	315;333;409;427;348;366;57;64;125;131;151;169;239;320	1	16	0.0002586	3.1119	2.9	8.3	8.3	1961100	18173000	41364000	15325000	0	3	1	7
H0YMV8;Q71UM5;C9JLI6	H0YMV8;Q71UM5;C9JLI6	3;3;2	1;1;1	1;1;1	165680000	0	124130000	40S ribosomal protein S27;40S ribosomal protein S27-like	RPS27L	;;	3	3	1	1	3	3	3	1	1	1	1	1	1	32	11	11	11.345	100	100;84;97	1	23	0	33.624	32	32	32	65483000	176250000	57272000	129740000	2	0	1	12
H0YNG3;P67812-4;P67812;P67812-3;H0YNX5;P67812-2;H0YKT4;H0YNA5;P0C7V7	H0YNG3;P67812-4;P67812;P67812-3;H0YNX5;P67812-2;H0YKT4;H0YNA5	6;6;6;6;4;4;3;3;1	6;6;6;6;4;4;3;3;1	6;6;6;6;4;4;3;3;1	487400000	459250000	483780000	Signal peptidase complex catalytic subunit SEC11;Signal peptidase complex catalytic subunit SEC11A;Signal peptidase I	SEC11A	;;;;;;;	9	6	6	6	6	6	6	6	6	6	6	6	6	27.6	27.6	27.6	18.651	163	163;164;179;185;106;153;129;135;166	1	77	0	11.975	27.6	27.6	27.6	429670000	511690000	493820000	514210000	2	4	2	35
H0YNW5;P33316-2;P33316;H0YKC5;H0YMM5;H0YNJ9;H0YKI0;H0YMP1	H0YNW5;P33316-2;P33316;H0YKC5;H0YMM5;H0YNJ9;H0YKI0	9;9;9;8;6;6;6;3	9;9;9;8;6;6;6;3	9;9;9;8;6;6;6;3	867360000	846870000	957170000	Deoxyuridine 5-triphosphate nucleotidohydrolase, mitochondrial	DUT	;;;;;;	8	9	9	9	9	9	8	9	9	8	9	9	8	61.7	61.7	61.7	17.827	167	167;164;252;221;133;143;226;107	1	156	0	119.02	61.7	61.7	61.7	1013300000	1036800000	908050000	919400000	10	8	7	98
H3BLU7;O43488;H7C5H7;Q8NHP1	H3BLU7;O43488	8;8;1;1	8;8;1;1	8;8;1;1	306840000	247010000	325240000	Aflatoxin B1 aldehyde reductase member 2	AKR7A2	;	4	8	8	8	7	6	6	7	6	6	7	6	6	45.2	45.2	45.2	34.684	314	314;359;205;331	1	109	0	54.383	39.2	31.2	31.2	120320000	315700000	231570000	256730000	3	5	5	56
H3BLV9;B4DS61;Q96SB4;Q96SB4-3;Q5R363;A8MPP7;A8MPY5;E7ETV6;Q9UPE1-2;Q9UPE1-3;Q9UPE1-4;Q9UPE1;H7C2I2	H3BLV9;B4DS61;Q96SB4;Q96SB4-3;Q5R363	12;12;12;12;9;2;2;2;2;2;2;2;1	12;12;12;12;9;2;2;2;2;2;2;2;1	9;9;9;9;8;0;0;0;0;0;0;0;0	154370000	161990000	197290000	SRSF protein kinase 1	SRPK1	;;;;	13	12	12	9	7	9	7	7	9	7	7	7	6	22.8	22.8	17.6	76.039	671	671;639;655;826;547;492;534;634;491;533;566;567;129	1	106	0	32.499	13.4	17.7	12.7	207720000	140300000	253390000	112700000	3	6	3	46
H3BLZ8;Q92841;Q92841-1;Q92841-3;C9JMU5;Q92841-2;G5E9L5	H3BLZ8;Q92841;Q92841-1;Q92841-3;C9JMU5;Q92841-2	28;28;27;27;26;26;2	19;19;18;18;18;18;2	19;19;18;18;18;18;2	1693800000	1518500000	1510200000	Probable ATP-dependent RNA helicase DDX17	DDX17	;;;;;	7	28	19	19	25	24	25	18	17	17	18	17	17	42	30.2	30.2	80.439	731	731;729;650;652;652;652;181	1	315	0	199.61	37.2	34.6	36.1	1742500000	1751400000	1463700000	1799200000	15	10	12	166
H3BM14;H3BM74;Q9Y5A7-2;Q9Y5A7;H7C5N1;H7C5E1;C9J7X7;C9JRT6;F8WDB6	H3BM14;H3BM74;Q9Y5A7-2;Q9Y5A7;H7C5N1	4;4;4;4;2;1;1;1;1	4;4;4;4;2;1;1;1;1	4;4;4;4;2;1;1;1;1	35817000	36472000	30845000	NEDD8 ultimate buster 1	NUB1	;;;;	9	4	4	4	3	2	2	3	2	2	3	2	2	7.7	7.7	7.7	71.921	625	625;639;601;615;202;128;154;254;267	1	34	0	6.5572	5.6	4.3	3.8	26761000	37935000	28614000	18683000	0	1	0	7
H3BM67;H3BUP2;H3BUN4;O60936-2;O60936-3;O60936;J3QLT7;H3BQJ5	H3BM67;H3BUP2;H3BUN4;O60936-2;O60936-3;O60936	5;5;5;5;5;3;1;1	5;5;5;5;5;3;1;1	5;5;5;5;5;3;1;1	69550000	91796000	77571000	Nucleolar protein 3	NOL3	;;;;;	8	5	5	5	5	5	4	5	5	4	5	5	4	59.4	59.4	59.4	14.924	138	138;174;206;208;270;219;131;216	1	52	0	20.189	59.4	59.4	40.6	61776000	89651000	109940000	80751000	3	3	3	30
H3BMF4;Q9H2V7-3;Q9H2V7-2;Q9H2V7;Q9H2V7-4;H3BR82;H3BPT8;H3BPQ9;Q9H2V7-5;H3BT44	H3BMF4;Q9H2V7-3;Q9H2V7-2;Q9H2V7;Q9H2V7-4;H3BR82	5;5;5;5;4;3;2;2;2;1	5;5;5;5;4;3;2;2;2;1	5;5;5;5;4;3;2;2;2;1	121770000	106710000	112460000	Protein spinster homolog 1	SPNS1	;;;;;	10	5	5	5	5	5	4	5	5	4	5	5	4	11.9	11.9	11.9	61.105	573	573;454;476;528;455;538;179;274;229;178	1	70	0	27.653	11.9	11.9	9.9	118050000	165480000	129360000	124700000	3	3	3	39
H3BMQ0;P49815-6;P49815-5;P49815-3;P49815-2;P49815-4;P49815;P49815-7;H3BQK4;Q5HYF7	H3BMQ0;P49815-6;P49815-5;P49815-3;P49815-2;P49815-4;P49815;P49815-7;H3BQK4	6;6;6;6;6;6;6;5;3;1	6;6;6;6;6;6;6;5;3;1	6;6;6;6;6;6;6;5;3;1	23561000	0	0	Tuberin	TSC2	;;;;;;;;	10	6	6	6	2	2	3	2	2	3	2	2	3	4.7	4.7	4.7	194.39	1751	1751;1704;1740;1763;1764;1784;1807;1692;535;108	1	28	0	5.9335	2	1.1	2.6	24881000	21497000	15454000	26505000	1	0	0	10
H3BNT2;O75208;H3BPY0;H3BPC6;H3BSJ5;H3BPW3;H3BVA5;H3BRC0;O75208-2	H3BNT2;O75208;H3BPY0;H3BPC6;H3BSJ5	3;3;2;2;2;1;1;1;1	3;3;2;2;2;1;1;1;1	3;3;2;2;2;1;1;1;1	28844000	27918000	19119000	Ubiquinone biosynthesis protein COQ9, mitochondrial	COQ9	;;;;	9	3	3	3	3	3	2	3	3	2	3	3	2	15.8	15.8	15.8	33.886	303	303;318;89;188;283;102;172;207;135	1	29	0	4.377	15.8	15.8	10.6	32702000	34255000	32645000	19056000	1	1	1	14
H3BNX8;P20674;H3BRM5;H3BV69;H3BRI0	H3BNX8;P20674;H3BRM5;H3BV69	5;5;3;3;1	5;5;3;3;1	5;5;3;3;1	970050000	668130000	454560000	Cytochrome c oxidase subunit 5A, mitochondrial	COX5A	;;;	5	5	5	5	5	5	5	5	5	5	5	5	5	31.4	31.4	31.4	17.235	153	153;150;69;111;84	1	104	0	8.8711	31.4	31.4	31.4	1001000000	989650000	1123200000	821480000	3	3	3	35
H3BP20;P06865;H3BS10;E9PGL4;H3BU85;H3BTD4;B4DKE7	H3BP20;P06865;H3BS10;E9PGL4;H3BU85;H3BTD4	10;10;9;6;5;5;3	10;10;9;6;5;5;3	10;10;9;6;5;5;3	248580000	218240000	214860000	Beta-hexosaminidase;Beta-hexosaminidase subunit alpha	HEXA	;;;;;	7	10	10	10	8	9	8	8	9	8	8	9	8	20.6	20.6	20.6	61.999	540	540;529;509;301;318;373;168	1	99	0	22.726	18.5	16.9	14.8	237130000	275510000	256070000	230940000	4	5	3	44
H3BP71;O75150;O75150-4;F8W8Z4;O75150-3;H3BQ99;H3BUL6;I3L332;H3BS50	H3BP71;O75150;O75150-4;F8W8Z4;O75150-3	12;12;11;9;8;2;2;2;2	12;12;11;9;8;2;2;2;2	11;11;10;8;7;2;2;2;2	161360000	148610000	149720000	E3 ubiquitin-protein ligase BRE1B	RNF40	;;;;	9	12	12	11	10	8	7	10	8	7	9	8	6	15.6	15.6	14.2	109.02	961	961;1001;901;693;838;111;129;144;174	1	103	0	20.836	12.8	9.5	8.3	90772000	244080000	140570000	128510000	5	3	4	35
H3BPJ9;O96000;H3BV16;Q96II6	H3BPJ9;O96000;H3BV16;Q96II6	5;5;4;4	5;5;4;4	5;5;4;4	261580000	187940000	277520000	NADH dehydrogenase [ubiquinone] 1 beta subcomplex subunit 10	NDUFB10	;;;	4	5	5	5	5	5	4	5	5	4	5	5	4	38.5	38.5	38.5	19.258	161	161;172;142;168	1	73	0	25.656	38.5	38.5	29.8	245490000	312750000	203310000	304110000	4	3	3	47
H3BPM8;Q2TA70;B4DFF3;Q13286-4;Q13286-2;B4DXL3;Q13286-3;Q13286;O95090;Q9UBD8;H3BQ48;B4DMY6;Q13286-5;Q13286-6	H3BPM8;Q2TA70;B4DFF3;Q13286-4;Q13286-2;B4DXL3;Q13286-3;Q13286;O95090;Q9UBD8;H3BQ48;B4DMY6;Q13286-5;Q13286-6	2;2;2;2;2;2;2;2;1;1;1;1;1;1	2;2;2;2;2;2;2;2;1;1;1;1;1;1	2;2;2;2;2;2;2;2;1;1;1;1;1;1	78568000	96547000	110490000	Battenin	CLN3	;;;;;;;;;;;;;	14	2	2	2	2	2	2	2	2	2	2	2	2	9.4	9.4	9.4	36.272	341	341;360;384;321;390;414;421;438;167;181;184;338;253;339	1	36	0	4.692	9.4	9.4	9.4	79572000	87134000	91374000	124680000	0	1	2	10
H3BQG3;Q8NCN5;A8MT40	H3BQG3;Q8NCN5;A8MT40	4;4;2	4;4;2	4;4;2	23510000	0	0	Pyruvate dehydrogenase phosphatase regulatory subunit, mitochondrial	PDPR	;;	3	4	4	4	3	2	3	3	2	3	3	2	3	9.2	9.2	9.2	54.79	491	491;879;779	1	30	0.00026896	3.5988	7.7	5.1	5.5	22446000	32360000	17915000	27045000	1	0	0	4
H3BQQ2;Q86UK7-2;Q86UK7-3;Q86UK7	H3BQQ2;Q86UK7-2;Q86UK7-3;Q86UK7	3;3;3;3	3;3;3;3	3;3;3;3	28139000	35769000	35249000	Zinc finger protein 598	ZNF598	;;;	4	3	3	3	3	3	3	3	3	3	3	3	3	4.5	4.5	4.5	93.287	849	849;896;898;904	1	31	0	5.7285	4.5	4.5	4.5	16537000	38089000	51955000	34251000	2	2	1	13
H3BQV3;Q96MW5	H3BQV3;Q96MW5	2;2	2;2	2;2	15547000	0	0	Conserved oligomeric Golgi complex subunit 8	COG8	;	2	2	2	2	2	1	1	2	1	1	2	1	1	4.7	4.7	4.7	60.438	534	534;612	1	13	0	7.8382	4.7	2.1	2.1	6418300	17014000	7087300	9941900	2	1	0	7
H3BQZ7;Q1KMD3	H3BQZ7;Q1KMD3	14;14	14;14	14;14	235230000	201340000	237840000	Heterogeneous nuclear ribonucleoprotein U-like protein 2	HNRNPUL2-BSCL2;HNRNPUL2	;	2	14	14	14	9	12	8	9	12	8	9	12	8	26.8	26.8	26.8	84.69	746	746;747	1	116	0	75.074	17.8	24.3	16.8	320350000	262440000	290230000	234900000	3	3	2	48
H3BR94;Q9BTE1-2;Q9BTE1;H3BUD2;H3BS05;Q9BTE1-3	H3BR94;Q9BTE1-2;Q9BTE1;H3BUD2;H3BS05;Q9BTE1-3	3;3;3;2;2;2	3;3;3;2;2;2	3;3;3;2;2;2	87073000	0	56627000	Dynactin subunit 5	DCTN5	;;;;;	6	3	3	3	3	2	3	3	2	3	3	2	3	20	20	20	16.91	155	155;152;182;53;75;84	1	33	0	4.1896	20	13.5	20	68588000	100160000	39521000	59142000	0	0	2	8
H3BRL3;O14562;H3BUM8	H3BRL3;O14562	3;3;1	3;3;1	3;3;1	70137000	60767000	53355000	Ubiquitin domain-containing protein UBFD1	UBFD1	;	3	3	3	3	2	3	3	2	3	3	2	3	3	13.7	13.7	13.7	32.64	300	300;309;190	1	37	0	15.67	9.7	13.7	13.7	90095000	65449000	67594000	85108000	2	1	2	23
H3BSM5;P60520;H3BU36;H3BQ50;F5GZY7;Q9H0R8;Q9H0R8-2	H3BSM5;P60520	3;3;1;1;1;1;1	3;3;1;1;1;1;1	2;2;1;1;0;0;0	265760000	244970000	162040000	Gamma-aminobutyric acid receptor-associated protein-like 2	GABARAPL2	;	7	3	3	2	3	3	3	3	3	3	2	2	2	26.1	26.1	18.2	10.401	88	88;117;42;57;70;117;146	1	39	0.004496	2.0566	26.1	26.1	26.1	205210000	299730000	254600000	150210000	2	2	1	17
H3BT71;P38159;H3BR27;H0Y6E7;P38159-2;H3BNC1;Q96E39;O75526;Q8N7X1	H3BT71;P38159;H3BR27;H0Y6E7;P38159-2;H3BNC1;Q96E39;O75526	6;6;5;5;5;3;3;3;1	6;6;5;5;5;3;3;3;1	1;1;0;1;1;0;0;0;0	261730000	275740000	291960000	RNA-binding motif protein, X chromosome;RNA-binding motif protein, X chromosome, N-terminally processed;RNA binding motif protein, X-linked-like-1;RNA-binding motif protein, X-linked-like-2	RBMX;RBMXL1;RBMXL2	;;;;;;;	9	6	6	1	5	6	5	5	6	5	1	1	1	21.6	21.6	4.4	32.197	296	296;391;78;292;378;37;390;392;1067	1	97	0	20.585	18.9	21.6	18.9	256110000	305650000	350580000	309390000	5	5	4	49
H3BTL1;Q9GZQ8;A6NCE7;Q9H492;Q9H492-2	H3BTL1;Q9GZQ8;A6NCE7;Q9H492;Q9H492-2	2;2;2;1;1	2;2;2;1;1	2;2;2;1;1	286060000	291180000	351550000	Microtubule-associated proteins 1A/1B light chain 3B;Microtubule-associated proteins 1A/1B light chain 3 beta 2;Microtubule-associated proteins 1A/1B light chain 3A	MAP1LC3B;MAP1LC3B2;MAP1LC3A	;;;;	5	2	2	2	2	2	2	2	2	2	2	2	2	28	28	28	9.0115	75	75;125;125;121;125	1	36	0	13.079	28	28	28	306090000	309910000	322610000	357280000	2	3	3	26
H3BU93;Q9GZU8;H3BNK9;H3BUL4;H3BMX9;H3BQQ6;H3BTI2;H3BTP8;H3BSY6;H3BP64	H3BU93;Q9GZU8;H3BNK9;H3BUL4;H3BMX9	3;3;2;2;2;1;1;1;1;1	3;3;2;2;2;1;1;1;1;1	3;3;2;2;2;1;1;1;1;1	68989000	76644000	73827000	Protein FAM192A	FAM192A	;;;;	10	3	3	3	2	3	3	2	3	3	2	3	3	16.4	16.4	16.4	19.351	177	177;254;154;160;165;96;106;130;140;148	1	34	0	6.8186	12.4	16.4	16.4	26648000	25393000	102270000	80352000	1	1	2	13
H3BUF6;Q8WWM7-6;Q8WWM7-8;Q8WWM7-5;Q8WWM7-4;Q8WWM7-9;Q8WWM7-2;Q8WWM7;Q8WWM7-3;H3BSK9;Q8WWM7-7;H3BSQ5;H3BUE3;S4R3J6;H3BRB0;F8WB05	H3BUF6;Q8WWM7-6;Q8WWM7-8;Q8WWM7-5;Q8WWM7-4;Q8WWM7-9;Q8WWM7-2;Q8WWM7;Q8WWM7-3;H3BSK9	23;23;23;23;23;23;23;23;23;12;11;5;5;1;1;1	23;23;23;23;23;23;23;23;23;12;11;5;5;1;1;1	22;22;22;22;22;22;22;22;22;12;11;5;5;0;1;0	585990000	674590000	611920000	Ataxin-2-like protein	ATXN2L	;;;;;;;;;	16	23	23	22	20	19	20	20	19	20	20	18	19	24.6	24.6	23.9	112.71	1068	1068;968;1044;1044;1044;1062;1062;1075;1097;336;399;91;217;107;401;424	1	268	0	68.976	21.7	19.8	20.8	587600000	665940000	672430000	691680000	13	12	12	124
H3BV80;H3BMM9;H3BTC0;Q15287;H3BMS0;Q15287-3;Q15287-2;H3BPG5;H3BRK4;H3BTV0;H3BNI3;H3BP82;H3BTR6;H3BUG0;H3BTY0;H3BNU7;H3BUL0	H3BV80;H3BMM9;H3BTC0;Q15287;H3BMS0;Q15287-3;Q15287-2;H3BPG5	4;4;4;4;3;3;3;2;1;1;1;1;1;1;1;1;1	4;4;4;4;3;3;3;2;1;1;1;1;1;1;1;1;1	4;4;4;4;3;3;3;2;1;1;1;1;1;1;1;1;1	90480000	69937000	89378000	RNA-binding protein with serine-rich domain 1	RNPS1	;;;;;;;	17	4	4	4	4	3	3	4	3	3	4	3	3	19.9	19.9	19.9	24.561	211	211;284;302;305;257;268;282;128;29;45;85;98;127;139;150;156;169	1	45	0	20.059	19.9	16.6	16.6	69882000	96784000	65373000	101170000	1	1	1	24
H3BVF7;Q0P6H9;H3BPV2	H3BVF7;Q0P6H9	6;6;2	6;6;2	6;6;2	36161000	37910000	37801000	Transmembrane protein 62	TMEM62	;	3	6	6	6	4	4	4	4	4	4	4	4	4	13.7	13.7	13.7	61.933	540	540;643;129	1	45	0	9.9565	8.1	8.1	7.4	49875000	34304000	35472000	31188000	0	0	1	9
H3BVG0;Q8N1F7;Q8N1F7-2;H3BRI8;H3BM93;H3BNN5;H3BV11;H3BPA9;H3BP95;H3BMX0;H3BVE2;H3BRD9;H3BNG7;H3BV15	H3BVG0;Q8N1F7;Q8N1F7-2	18;18;13;6;6;5;5;5;4;3;2;2;1;1	18;18;13;6;6;5;5;5;4;3;2;2;1;1	18;18;13;6;6;5;5;5;4;3;2;2;1;1	228410000	229590000	230660000	Nuclear pore complex protein Nup93	NUP93	;;	14	18	18	18	14	13	10	14	13	10	14	13	10	26	26	26	99.554	880	880;819;696;151;178;132;136;229;156;125;117;140;40;84	1	172	0	33.921	20.5	19	14.5	195840000	221260000	278230000	214520000	6	8	3	59
H7BXH2;E9PKF6;G8JLI3;Q5H9R7-6;Q5H9R7-2;Q5H9R7;Q5H9R7-5;Q5H9R7-3;Q5H9R7-4;E9PQP7;E9PK08;H0YEN2;E9PNN8;E9PJD8;E9PKG4;H0YDW1	H7BXH2;E9PKF6;G8JLI3;Q5H9R7-6;Q5H9R7-2;Q5H9R7;Q5H9R7-5;Q5H9R7-3;Q5H9R7-4;E9PQP7	18;18;18;18;18;18;18;17;17;11;7;7;6;2;2;2	18;18;18;18;18;18;18;17;17;11;7;7;6;2;2;2	18;18;18;18;18;18;18;17;17;11;7;7;6;2;2;2	369970000	367130000	331590000	Serine/threonine-protein phosphatase 6 regulatory subunit 3	PPP6R3	;;;;;;;;;	16	18	18	18	11	15	14	11	15	14	11	15	14	25.6	25.6	25.6	92.407	827	827;838;879;844;867;873;879;791;793;641;140;580;186;39;75;112	1	214	0	47.996	14.4	21.4	19.3	419900000	358280000	433030000	406480000	7	4	6	73
H7BXI1;A0FGR8-2;A0FGR8;A0FGR8-6;A0FGR8-4;F2Z3K9;A0FGR8-5	H7BXI1;A0FGR8-2;A0FGR8;A0FGR8-6;A0FGR8-4;F2Z3K9;A0FGR8-5	16;16;16;16;9;8;8	16;16;16;16;9;8;8	16;16;16;16;9;8;8	276520000	281760000	293920000	Extended synaptotagmin-2	ESYT2	;;;;;;	7	16	16	16	14	13	12	14	13	12	14	13	12	28.6	28.6	28.6	98.008	884	884;893;921;942;527;328;328	1	179	0	69.467	23.2	22.5	21.2	217710000	353940000	295740000	347010000	6	6	5	70
H7BXY3;Q7L2E3-3;Q7L2E3;Q7L2E3-2	H7BXY3;Q7L2E3-3;Q7L2E3;Q7L2E3-2	21;21;21;21	21;21;21;21	21;21;21;21	274250000	245520000	260110000	Putative ATP-dependent RNA helicase DHX30	DHX30	;;;	4	21	21	21	17	17	15	17	17	15	17	17	15	20.8	20.8	20.8	130.55	1166	1166;1155;1194;1222	1	187	0	42.981	17	17.2	15.2	237550000	297880000	286370000	278330000	8	4	5	74
H7BY58;P22061;P22061-2;B7Z972;F8WDT3;F8WAV5;F8WAX2;C9J0F2;H7C4X2	H7BY58;P22061;P22061-2;B7Z972	11;11;11;9;3;3;3;2;1	11;11;11;9;3;3;3;2;1	11;11;11;9;3;3;3;2;1	1543500000	1434200000	1648100000	Protein-L-isoaspartate O-methyltransferase;Protein-L-isoaspartate(D-aspartate) O-methyltransferase	PCMT1	;;;	9	11	11	11	8	9	10	8	9	10	8	9	10	49.7	49.7	49.7	30.358	286	286;227;228;192;120;124;130;96;67	1	191	0	85.322	42.3	45.8	49.7	1512200000	1396300000	1570800000	1543800000	9	11	11	123
H7BYY1;F5H7S3;B7Z596;P09493-2;H0YK48;P09493-5;H0YN06	H7BYY1;F5H7S3;B7Z596;P09493-2;H0YK48;P09493-5	15;14;14;12;10;10;1	2;2;2;1;2;2;1	2;2;2;1;2;2;1	76221000	0	0	Tropomyosin alpha-1 chain	TPM1	;;;;;	7	15	2	2	14	12	11	2	0	0	2	0	0	47.6	9.7	9.7	28.747	248	248;245;275;228;248;245;49	1	10	0	10.935	47.6	34.7	35.1	46996000	82986000	0	0	0	0	0	5
H7BZJ3	H7BZJ3	7	1	1	806990000	979260000	734140000		PDIA3		1	7	1	1	7	7	7	1	1	1	1	1	1	54.5	11.4	11.4	13.519	123	123	1	24	0	21.937	54.5	54.5	54.5	842590000	1134300000	802870000	932700000	1	2	1	14
H7BZT4;P61956-2;P61956;Q6EEV6	H7BZT4;P61956-2;P61956;Q6EEV6	2;2;2;1	2;2;2;1	1;1;1;0	1085800000	1189300000	1119600000	Small ubiquitin-related modifier 2;Small ubiquitin-related modifier 4	SUMO2;SUMO4	;;;	4	2	2	1	2	2	2	2	2	2	1	1	1	23.2	23.2	10.5	10.839	95	95;71;95;95	1	45	0	17.775	23.2	23.2	23.2	1404800000	1313500000	1441500000	1332200000	3	2	3	28
H7BZW6;X6RAL5;O00422;U3KPY7	H7BZW6;X6RAL5;O00422	5;5;5;2	5;5;5;2	5;5;5;2	53519000	46143000	0	Histone deacetylase complex subunit SAP18	SAP18	;;	4	5	5	5	2	4	3	2	4	3	2	4	3	49.7	49.7	49.7	16.036	143	143;172;153;78	1	54	0	9.3276	24.5	43.4	33.6	74168000	35095000	78121000	45826000	1	0	1	13
H7C0E5;O75312;H7BZM7	H7C0E5;O75312;H7BZM7	7;7;6	7;7;6	7;7;6	80212000	82766000	81618000	Zinc finger protein ZPR1	ZPR1	;;	3	7	7	7	3	3	5	3	3	5	3	3	5	23.1	23.1	23.1	42.542	386	386;459;430	1	58	0	21.522	9.1	9.1	16.3	102050000	42582000	44899000	90026000	1	2	0	17
H7C0X4;Q92685;B4DS50;C9J7S5;Q92685-2;F8WF93;H7BZZ2;F8WE30	H7C0X4;Q92685;B4DS50;C9J7S5;Q92685-2	4;4;3;3;3;1;1;1	4;4;3;3;3;1;1;1	4;4;3;3;3;1;1;1	43318000	46282000	21477000	Dol-P-Man:Man(5)GlcNAc(2)-PP-Dol alpha-1,3-mannosyltransferase	ALG3	;;;;	8	4	4	4	3	3	3	3	3	3	3	3	3	13.3	13.3	13.3	36.898	323	323;438;382;398;390;65;105;107	1	32	0	5.9824	10.2	9.9	9.9	36614000	53073000	49406000	23201000	3	2	1	14
H7C173;H7C202;B8ZZ87;Q6P582;Q6NZ67;H7BZ50	H7C173;H7C202;B8ZZ87;Q6P582;Q6NZ67;H7BZ50	3;3;3;3;3;2	3;3;3;3;3;2	3;3;3;3;3;2	38298000	32120000	32327000	Mitotic-spindle organizing protein 2A;Mitotic-spindle organizing protein 2B	MZT2B;MZT2A	;;;;;	6	3	3	3	2	2	3	2	2	3	2	2	3	34.4	34.4	34.4	12.395	122	122;140;218;158;158;121	1	30	0	4.879	16.4	16.4	34.4	31939000	40154000	30576000	31105000	1	0	2	18
H7C1N3;O15155;C9JTT8;Q68DU7;Q96EA0	H7C1N3;O15155;C9JTT8;Q68DU7;Q96EA0	2;2;1;1;1	2;2;1;1;1	2;2;1;1;1	156130000	122630000	108190000	BET1 homolog	BET1;DKFZp781C0425	;;;;	5	2	2	2	2	2	2	2	2	2	2	2	2	21.8	21.8	21.8	14.872	133	133;118;98;127;83	1	41	0	28.957	21.8	21.8	21.8	71682000	193780000	137890000	94045000	3	1	2	32
H7C1U8;C9J574;Q9BUR5-2;Q9BUR5;G3V1B6	H7C1U8;C9J574;Q9BUR5-2;Q9BUR5;G3V1B6	4;4;4;4;2	4;4;4;4;2	4;4;4;4;2	79181000	95867000	89184000	Apolipoprotein O	APOO	;;;;	5	4	4	4	4	4	3	4	4	3	4	4	3	24.2	24.2	24.2	20.08	178	178;179;180;198;114	1	42	0	9.2131	24.2	24.2	18.5	47227000	102820000	87272000	89346000	2	3	2	23
H7C2Q8;Q99848	H7C2Q8;Q99848	4;4	4;4	4;4	39099000	37924000	47747000	Probable rRNA-processing protein EBP2	EBNA1BP2	;	2	4	4	4	4	3	3	4	3	3	4	3	3	14.7	14.7	14.7	40.684	361	361;306	1	34	0	8.2446	14.7	11.6	11.6	47705000	44966000	43058000	48084000	3	1	2	22
H7C389;Q8ND98;Q96MX6-2;Q96MX6	H7C389;Q8ND98;Q96MX6-2;Q96MX6	3;3;3;3	3;3;3;3	3;3;3;3	32732000	0	25664000	WD repeat-containing protein 92	WDR92;DKFZp434B156	;;;	4	3	3	3	3	2	3	3	2	3	3	2	3	34.8	34.8	34.8	10.392	92	92;187;288;357	1	31	0.00051138	2.9217	34.8	27.2	34.8	28870000	52702000	33692000	29670000	1	0	0	8
H7C3T2;Q2TAZ0;Q2TAZ0-3	H7C3T2;Q2TAZ0;Q2TAZ0-3	1;1;1	1;1;1	1;1;1	10156000	0	0	Autophagy-related protein 2 homolog A	ATG2A	;;	3	1	1	1	1	0	0	1	0	0	1	0	0	0.8	0.8	0.8	190.64	1742	1742;1938;1940	1	2	0.00026103	3.2268	0.8	0	0	0	11058000	0	0	1	0	0	2
H7C5A7;O14734;H0Y698;Q9BR14;E9PMC4;E9PIS4;E9PJN0	H7C5A7;O14734;H0Y698;Q9BR14;E9PMC4;E9PIS4;E9PJN0	2;2;1;1;1;1;1	2;2;1;1;1;1;1	2;2;1;1;1;1;1	36837000	34279000	0	Acyl-coenzyme A thioesterase 8	ACOT8	;;;;;;	7	2	2	2	2	1	1	2	1	1	2	1	1	15.3	15.3	15.3	23.333	209	209;319;74;92;94;132;226	1	27	0	6.3756	15.3	7.7	7.7	53579000	50455000	32177000	9323800	2	0	0	8
H7C5E4;Q8IZH2-2;Q8IZH2	H7C5E4;Q8IZH2-2;Q8IZH2	1;1;1	1;1;1	1;1;1	0	0	4924600	5-3 exoribonuclease 1	XRN1	;;	3	1	1	1	1	0	1	1	0	1	1	0	1	0.8	0.8	0.8	130.08	1160	1160;1694;1706	1	4	0.0099593	1.6429	0.8	0	0.8	0	3059100	0	5092200	0	0	0	1
H7C5F7;H0Y8A7;Q9NV92	H7C5F7;H0Y8A7;Q9NV92	1;1;1	1;1;1	1;1;1	97009000	0	0	NEDD4 family-interacting protein 2	NDFIP2	;;	3	1	1	1	1	1	1	1	1	1	1	1	1	9	9	9	16.76	156	156;233;336	1	17	0.0010098	2.7691	9	9	9	88026000	101590000	41833000	28709000	1	1	0	5
H7C5S6;Q9UFC0	H7C5S6;Q9UFC0	3;3	3;3	3;3	43157000	0	0	Leucine-rich repeat and WD repeat-containing protein 1	LRWD1	;	2	3	3	3	3	1	2	3	1	2	3	1	2	33.5	33.5	33.5	19.914	179	179;647	1	19	0	5.6392	33.5	15.1	22.9	15695000	44203000	21421000	31594000	2	0	0	5
I1E4Y6;Q6Y7W6-4;Q6Y7W6-5;Q6Y7W6;Q6Y7W6-3;E9PC50;C9JHW1;E7ESB6;C9JH18;F8WCD5;C9JPV7;C9JXQ0;C9J0V6;C9JHT0;C9JRZ2;C9J7G1;B8ZZD2	I1E4Y6;Q6Y7W6-4;Q6Y7W6-5;Q6Y7W6;Q6Y7W6-3;E9PC50;C9JHW1;E7ESB6	15;15;15;15;14;10;8;8;2;1;1;1;1;1;1;1;1	15;15;15;15;14;10;8;8;2;1;1;1;1;1;1;1;1	15;15;15;15;14;10;8;8;2;1;1;1;1;1;1;1;1	214700000	242670000	236220000	PERQ amino acid-rich with GYF domain-containing protein 2	GIGYF2	;;;;;;;	17	15	15	15	13	11	10	13	11	10	13	11	10	16.1	16.1	16.1	152.53	1321	1321;1286;1293;1299;1320;872;720;836;149;92;93;99;106;112;115;143;176	1	190	0	33.715	14.3	10.6	10.4	217670000	237790000	262490000	249020000	6	4	4	62
I3L0N3;P46459;B4DFA2;I3L2G1;K7EQD6;I3L0L3;I3L338;I3L4Q9	I3L0N3;P46459;B4DFA2	27;27;25;7;6;5;2;2	27;27;25;7;6;5;2;2	27;27;25;7;6;5;2;2	464660000	433680000	368770000	Vesicle-fusing ATPase	NSF	;;	8	27	27	27	16	13	18	16	13	18	16	13	18	40.9	40.9	40.9	82.091	739	739;744;644;136;180;161;44;81	1	226	0	62.205	25.7	21.4	25.8	384700000	547170000	441350000	390040000	5	5	6	79
I3L0U2;Q9Y6M0-3;Q9Y6M0-2;Q9Y6M0;I3L3C7	I3L0U2;Q9Y6M0-3;Q9Y6M0-2;Q9Y6M0;I3L3C7	4;4;4;4;3	4;4;4;4;3	4;4;4;4;3	78048000	71549000	75492000	Testisin	PRSS21	;;;;	5	4	4	4	3	3	3	3	3	3	3	3	3	20.2	20.2	20.2	24.706	218	218;300;312;314;256	1	36	0	7.3993	15.1	16.1	16.1	75301000	90859000	94232000	73563000	2	1	1	12
I3L1D4;B0QYY7;S4R469;F8VR27;F8VZY7;B0QYV1;B0QYY4;J3KNW3;B7Z1U7;F8VZG9;O43251-9;Q9NWB1-3;O43251-4;O43251-5;O43251-10;O43251-2;O43251;Q9NWB1-4;Q9NWB1-5;Q9NWB1;O43251-7;Q9NWB1-2;O43251-6;O43251-8;B0QYY6;S4R3K7;J3QQZ2;J3QRF4;F8VRS4;A6NFN3;B4DF29;O43251-3	I3L1D4;B0QYY7;S4R469;F8VR27;F8VZY7;B0QYV1;B0QYY4;J3KNW3;B7Z1U7;F8VZG9;O43251-9;Q9NWB1-3;O43251-4;O43251-5;O43251-10;O43251-2;O43251;Q9NWB1-4;Q9NWB1-5;Q9NWB1;O43251-7;Q9NWB1-2;O43251-6;O43251-8;B0QYY6;S4R3K7;J3QQZ2;J3QRF4;F8VRS4;A6NFN3;B4DF29;O43251-3	2;2;2;2;2;2;2;2;2;2;2;2;2;2;2;2;2;2;2;2;2;2;2;2;1;1;1;1;1;1;1;1	2;2;2;2;2;2;2;2;2;2;2;2;2;2;2;2;2;2;2;2;2;2;2;2;1;1;1;1;1;1;1;1	2;2;2;2;2;2;2;2;2;2;2;2;2;2;2;2;2;2;2;2;2;2;2;2;1;1;1;1;1;1;1;1	20618000	0	0	RNA binding protein fox-1 homolog;RNA binding protein fox-1 homolog 2;RNA binding protein fox-1 homolog 1;RNA binding protein fox-1 homolog 3	RBFOX1;RBFOX2;RBFOX3	;;;;;;;;;;;;;;;;;;;;;;;;;;;;;;;	32	2	2	2	2	1	1	2	1	1	2	1	1	12.7	12.7	12.7	20.66	189	189;200;234;262;263;357;370;402;425;466;367;370;370;376;380;381;390;392;395;397;400;418;450;451;128;230;328;358;391;312;325;358	1	20	0.0051753	1.9965	12.7	7.9	7.9	19977000	21956000	15945000	16301000	0	1	1	11
I3L1P8;Q02978;Q02978-2	I3L1P8;Q02978;Q02978-2	11;11;8	11;11;8	11;11;8	463620000	416670000	408650000	Mitochondrial 2-oxoglutarate/malate carrier protein	SLC25A11	;;	3	11	11	11	6	9	9	6	9	9	6	9	9	46.6	46.6	46.6	32.182	296	296;314;263	1	116	0	62.778	30.1	39.5	39.2	443870000	458790000	556640000	442980000	6	8	6	74
I3L1R7;Q99447;Q99447-3;I3L3V9;I3L2Q1;I3L1L9;Q99447-2;Q99447-4;I3L102	I3L1R7;Q99447;Q99447-3;I3L3V9;I3L2Q1;I3L1L9;Q99447-2;Q99447-4	4;4;4;3;3;3;3;3;1	4;4;4;3;3;3;3;3;1	4;4;4;3;3;3;3;3;1	36917000	53352000	40211000	Ethanolamine-phosphate cytidylyltransferase	PCYT2	;;;;;;;	9	4	4	4	3	2	3	3	2	3	3	2	3	12.5	12.5	12.5	41.395	367	367;389;407;207;286;314;311;357;44	1	36	0	7.5587	8.7	6.5	8.7	49660000	43292000	39361000	45681000	1	2	0	14
I3L2C7;P57678;I3L399;E7EN12;I3L4M4;I3L4A4	I3L2C7;P57678	12;12;2;1;1;1	12;12;2;1;1;1	12;12;2;1;1;1	118380000	68606000	52802000	Gem-associated protein 4	GEMIN4	;	6	12	12	12	7	5	6	7	5	6	7	5	6	15.1	15.1	15.1	118.82	1047	1047;1058;296;184;189;271	1	81	0	13.813	9.6	6.4	7.5	56399000	112030000	70815000	69437000	6	2	1	30
I3L2X1;Q9BYC9;B7Z746	I3L2X1;Q9BYC9;B7Z746	1;1;1	1;1;1	1;1;1	53017000	45260000	44639000	39S ribosomal protein L20, mitochondrial	MRPL20	;;	3	1	1	1	1	1	1	1	1	1	1	1	1	16.7	16.7	16.7	7.5961	66	66;149;155	1	20	0.004066	2.1934	16.7	16.7	16.7	53196000	55512000	45855000	44215000	1	1	1	10
I3L3E4;I3L4G8;I3L4A1;Q96FZ7	I3L3E4;I3L4G8;I3L4A1;Q96FZ7	1;1;1;1	1;1;1;1	1;1;1;1	0	0	16554000	Charged multivesicular body protein 6	CHMP6	;;;	4	1	1	1	1	1	1	1	1	1	1	1	1	11.5	11.5	11.5	12.939	113	113;173;224;201	1	6	0	5.7963	11.5	11.5	11.5	0	14250000	6109800	17117000	1	0	1	4
I3L3V4;I3L4Z6;I3L0K1;E7EQ34;O14653;O14653-2;I3NI02;I3L1K7;O14653-3	I3L3V4;I3L4Z6;I3L0K1;E7EQ34;O14653;O14653-2;I3NI02;I3L1K7;O14653-3	2;2;2;2;2;2;1;1;1	2;2;2;2;2;2;1;1;1	2;2;2;2;2;2;1;1;1	19074000	0	0	Golgi SNAP receptor complex member 2	GOSR2	;;;;;;;;	9	2	2	2	1	2	0	1	2	0	1	2	0	18.1	18.1	18.1	17.794	149	149;165;199;232;212;213;98;143;195	1	19	0	6.8955	10.7	18.1	0	11087000	19858000	9930500	0	2	1	0	9
I3L4N6;Q9UP95-5;Q9UP95-2;Q9UP95-6;Q9UP95;Q9UP95-7;Q9UP95-3;Q9UP95-4;B3KXX3;Q9UHW9-6;Q9UHW9-5;Q9UHW9-2;Q9H2X9-2;Q9UHW9-3;Q9H2X9;Q9UHW9-4;Q9UHW9;H0YMQ9;H0YKQ8	I3L4N6;Q9UP95-5;Q9UP95-2;Q9UP95-6;Q9UP95;Q9UP95-7;Q9UP95-3;Q9UP95-4	7;7;7;7;7;7;6;4;3;3;3;3;3;3;3;3;3;2;2	7;7;7;7;7;7;6;4;3;3;3;3;3;3;3;3;3;2;2	7;7;7;7;7;7;6;4;3;3;3;3;3;3;3;3;3;2;2	36969000	41757000	0	Solute carrier family 12 member 4	SLC12A4	;;;;;;;	19	7	7	7	4	2	1	4	2	1	4	2	1	7.3	7.3	7.3	115.05	1037	1037;1054;1068;1079;1085;1087;1011;780;962;1084;1091;1099;1116;1135;1139;1141;1150;906;942	1	33	0	9.1105	4.3	2.6	1.2	4310000	21746000	25152000	8955000	3	2	1	20
I3L533;I3L2R9;Q9NXR1-2;Q9NXR1;I3L2R3;I3L2T8;I3L522;J3QSD2;J3QRZ1;A6NIZ0;Q9GZM8-3;Q9GZM8;Q9GZM8-2	I3L533;I3L2R9;Q9NXR1-2;Q9NXR1;I3L2R3;I3L2T8;I3L522	3;3;3;3;2;2;2;1;1;1;1;1;1	3;3;3;3;2;2;2;1;1;1;1;1;1	3;3;3;3;2;2;2;1;1;1;1;1;1	23126000	0	0	Nuclear distribution protein nudE homolog 1	NDE1	;;;;;;	13	3	3	3	2	0	2	2	0	2	2	0	2	26.8	26.8	26.8	15.744	153	153;173;335;346;137;139;192;194;196;269;328;345;367	1	17	0	7.1072	20.3	0	19	13127000	24927000	0	5842100	1	0	1	12
J3KMX1;Q99567;I3L245	J3KMX1;Q99567	7;7;3	7;7;3	7;7;3	0	90547000	80084000	Nuclear pore complex protein Nup88	NUP88	;	3	7	7	7	4	5	5	4	5	5	4	5	5	16.1	16.1	16.1	78.77	696	696;741;153	1	60	0	17.226	8.5	11.1	11.2	77141000	66894000	81375000	77989000	0	1	2	16
J3KMX2;Q92925-3;Q92925-2;Q92925;J3QWB6;F8VW95;F8VZ70;F8VUB0;Q6STE5	J3KMX2;Q92925-3;Q92925-2;Q92925;J3QWB6	4;4;4;4;2;1;1;1;1	4;4;4;4;2;1;1;1;1	3;3;3;3;2;0;0;0;0	34873000	0	0	SWI/SNF-related matrix-associated actin-dependent regulator of chromatin subfamily D member 2	SMARCD2	;;;;	9	4	4	3	2	2	2	2	2	2	1	1	1	15.8	15.8	12.1	52.238	456	456;483;510;531;231;113;278;289;483	1	31	0	9.9725	9.2	8.1	8.1	27450000	43834000	28775000	9333400	2	2	1	15
J3KMY5;H0YIZ1;G3V3E8;E7EMS2;G3V3D1;P61916;G3V2V8;B4DQV7	J3KMY5;H0YIZ1;G3V3E8;E7EMS2;G3V3D1;P61916;G3V2V8;B4DQV7	5;5;5;5;5;5;4;4	5;5;5;5;5;5;4;4	5;5;5;5;5;5;4;4	270810000	390880000	376030000	Epididymal secretory protein E1	NPC2	;;;;;;;	8	5	5	5	5	5	4	5	5	4	5	5	4	43.2	43.2	43.2	16.23	148	148;173;174;201;221;151;122;125	1	86	0	59.045	43.2	43.2	38.5	467840000	383630000	520000000	482910000	4	2	9	54
J3KMZ8;B4DT58;Q92785;E9PN04	J3KMZ8;B4DT58;Q92785;E9PN04	2;2;2;1	2;2;2;1	2;2;2;1	0	23994000	29073000	Zinc finger protein ubi-d4	DPF2	;;;	4	2	2	2	0	2	2	0	2	2	0	2	2	7.7	7.7	7.7	45.78	405	405;207;391;106	1	17	0	5.0534	0	7.7	7.7	25237000	0	22495000	27658000	0	1	1	7
J3KMZ9;P01130-3;P01130-4;P01130;P01130-2;P01130-6	J3KMZ9;P01130-3;P01130-4;P01130;P01130-2;P01130-6	13;13;13;13;12;12	13;13;13;13;12;12	1;1;1;1;1;1	440050000	477860000	481740000	Low-density lipoprotein receptor	LDLR	;;;;;	6	13	13	1	12	10	10	12	10	10	1	1	1	18.2	18.2	2.1	104.56	945	945;692;819;860;682;739	1	169	0	63.355	17	13.2	13.1	539460000	454160000	371350000	456630000	8	7	7	85
J3KN16;Q5VYK3;R4GMY1;Q5VYK5;F6XAQ5;R4GMY3	J3KN16;Q5VYK3	39;39;17;5;5;2	39;39;17;5;5;2	39;39;17;5;5;2	701580000	631410000	692070000	Proteasome-associated protein ECM29 homolog	KIAA0368;ECM29	;	6	39	39	39	28	25	24	28	25	24	28	25	24	26.8	26.8	26.8	223.69	2017	2017;1845;890;129;142;128	1	347	0	114.94	18.2	16.7	15.6	589240000	825960000	657590000	631430000	17	14	8	154
J3KN32;Q9UKL0;E9PQE5;B4DV59;Q9P2K3-2;Q9P2K3-4;Q9P2K3;Q9P2K3-3	J3KN32;Q9UKL0	3;3;1;1;1;1;1;1	3;3;1;1;1;1;1;1	3;3;1;1;1;1;1;1	30597000	0	0	REST corepressor 1	RCOR1	;	8	3	3	3	2	2	1	2	2	1	2	2	1	12.8	12.8	12.8	53.327	485	485;482;149;374;436;449;495;553	1	21	0	6.561	8.7	9.1	3.7	26534000	30038000	33282000	12356000	1	1	0	8
J3KN36;Q5JPE7-2;P69849;Q5JPE7;F5H826;Q5JPE7-3;H3BPS9;I3L0Q6;H3BTW1;I3L1G6	J3KN36;Q5JPE7-2;P69849;Q5JPE7;F5H826;Q5JPE7-3	37;37;37;37;33;33;5;2;2;1	37;37;37;37;33;33;5;2;2;1	3;3;3;3;3;3;1;0;0;1	1312200000	1257500000	1358900000	Nodal modulator 2;Nodal modulator 3	NOMO3;NOMO2	;;;;;	10	37	37	3	27	25	28	27	25	28	1	1	1	41.4	41.4	3.1	139.38	1267	1267;1222;1222;1267;1100;1100;223;138;138;95	1	445	0	236.24	30.9	28.1	31.6	1517000000	1485000000	1265300000	1506500000	25	22	21	288
J3KN66;Q5JTV8;H0Y4R4;Q5JTV8-2;H0YD16;H0YDU3	J3KN66;Q5JTV8;H0Y4R4	14;13;8;5;4;3	14;13;8;5;4;3	13;12;7;4;4;3	596860000	546970000	544390000	Torsin-1A-interacting protein 1	TOR1AIP1	;;	6	14	14	13	11	12	11	11	12	11	10	11	10	30.9	30.9	29.2	67.821	599	599;583;296;378;198;193	1	165	0	109.41	22.9	26	25.7	583560000	607050000	551320000	533840000	4	8	9	94
J3KN67;H0YLS7;D6RGJ6	J3KN67	22;1;1	1;1;1	0;0;0	0	417820000	479570000		TPM3		3	22	1	0	22	21	21	1	1	1	0	0	0	53.3	3.2	0	33.222	285	285;40;75	1	33	1	-2	53.3	53.3	50.9	610640000	480940000	528190000	608660000	0	2	1	12
J3KN69;Q6PIU2;Q6PIU2-2;H7C046;Q6PIU2-3;F8WE33	J3KN69;Q6PIU2;Q6PIU2-2;H7C046;Q6PIU2-3	8;8;8;6;5;1	8;8;8;6;5;1	8;8;8;6;5;1	328420000	320960000	334810000	Neutral cholesterol ester hydrolase 1	NCEH1	;;;;	6	8	8	8	7	7	7	7	7	7	7	7	7	24.8	24.8	24.8	49.062	440	440;408;416;307;275;93	1	110	0	55.573	21.1	21.1	23.2	329330000	385930000	366800000	366320000	5	7	8	68
J3KN82;Q96GX9;S4R3D6;Q96GX9-3	J3KN82;Q96GX9;S4R3D6;Q96GX9-3	4;4;3;3	4;4;3;3	4;4;3;3	107690000	88722000	108410000	Methylthioribulose-1-phosphate dehydratase	APIP	;;;	4	4	4	4	4	3	4	4	3	4	4	3	4	20.8	20.8	20.8	29.3	259	259;242;195;204	1	54	0	23.887	20.8	14.3	20.8	77088000	162270000	94352000	120150000	6	3	2	38
J3KNC0;P52655	J3KNC0;P52655	2;2	2;2	2;2	41711000	0	55071000	Transcription initiation factor IIA subunit 1;Transcription initiation factor IIA alpha chain;Transcription initiation factor IIA beta chain	GTF2A1	;	2	2	2	2	2	1	2	2	1	2	2	1	2	47.5	47.5	47.5	6.7407	59	59;376	1	17	0	11.398	47.5	18.6	47.5	27434000	43155000	41655000	56667000	1	1	2	11
J3KNF4;O14618;E9PP76;E9PK03	J3KNF4;O14618;E9PP76	3;3;2;1	3;3;2;1	3;3;2;1	37183000	0	17066000	Copper chaperone for superoxide dismutase;Superoxide dismutase [Cu-Zn]	CCS	;;	4	3	3	3	2	1	2	2	1	2	2	1	2	9	9	9	27.086	255	255;274;68;249	1	25	0.0026882	2.419	6.3	3.1	6.3	18126000	35492000	9926200	17187000	1	1	0	8
J3KNF8;J3QR91	J3KNF8	5;1	5;1	1;0	1748800000	1713900000	1979100000		CYB5B		2	5	5	1	5	5	5	5	5	5	1	1	1	59.3	59.3	10	16.694	150	150;64	1	125	0	133.12	59.3	59.3	59.3	1926000000	1841900000	1872100000	2050300000	9	11	9	116
J3KNK7;H3BND4;E7EMH5;E7EPL4;H3BNZ1;Q6P996;Q86XE2;Q6P996-2;H3BNL6;Q6P474	J3KNK7;H3BND4;E7EMH5;E7EPL4;H3BNZ1;Q6P996	18;18;18;18;18;18;6;5;2;2	18;18;18;18;18;18;6;5;2;2	18;18;18;18;18;18;6;5;2;2	434140000	440120000	420310000	Pyridoxal-dependent decarboxylase domain-containing protein 1	PDXDC1	;;;;;	10	18	18	18	16	16	13	16	16	13	16	16	13	35.4	35.4	35.4	85.12	773	773;806;697;760;761;788;498;429;271;469	1	196	0	64.331	30.9	31.6	26.5	386840000	552430000	541460000	464150000	9	10	6	84
J3KNL3;Q9BWS9-3;Q9BWS9;Q9BWS9-2;H0YC89;E9PPA0	J3KNL3;Q9BWS9-3;Q9BWS9;Q9BWS9-2;H0YC89;E9PPA0	2;2;2;2;1;1	2;2;2;2;1;1	2;2;2;2;1;1	19943000	0	0	Chitinase domain-containing protein 1	CHID1	;;;;;	6	2	2	2	2	0	0	2	0	0	2	0	0	6.6	6.6	6.6	48.215	423	423;362;393;418;108;224	1	6	0.0036075	2.2336	6.6	0	0	0	21713000	0	0	1	0	0	1
J3KNL6;O15027;O15027-5;O15027-2;O15027-4;O15027-3;X6RGP5;Q8N9G1	J3KNL6;O15027;O15027-5;O15027-2;O15027-4;O15027-3;X6RGP5	30;27;27;26;26;26;17;3	30;27;27;26;26;26;17;3	30;27;27;26;26;26;17;3	507000000	534200000	533530000	Protein transport protein Sec16A	SEC16A	;;;;;;	8	30	30	30	21	19	22	21	19	22	21	19	22	21.6	21.6	21.6	251.89	2357	2357;2179;2201;2134;2154;2159;1059;385	1	263	0	56.883	14	12.2	13.7	582120000	509770000	641710000	599620000	8	10	9	109
J3KNQ4;Q9NVD7;F5H1R9;B7Z952;E9PS97;Q9NVD7-2	J3KNQ4;Q9NVD7;F5H1R9;B7Z952;E9PS97	9;9;8;6;5;2	9;9;8;6;5;2	7;7;6;5;5;2	296640000	249580000	282640000	Alpha-parvin	PARVA	;;;;	6	9	9	7	8	8	6	8	8	6	6	6	4	27.7	27.7	22.6	46.589	412	412;372;372;290;209;182	1	107	0	55.23	24.3	24.3	17.7	259350000	339540000	276710000	245830000	6	5	4	63
J3KNW4;Q14192	J3KNW4;Q14192	9;9	9;9	9;9	223940000	291900000	181290000	Four and a half LIM domains protein 2	FHL2	;	2	9	9	9	9	7	6	9	7	6	9	7	6	26.5	26.5	26.5	44.205	389	389;279	1	100	0	21.513	26.5	21.6	18.8	228310000	269820000	302900000	160650000	4	5	3	55
J3KNX9;Q92614-2;Q92614-3;Q92614-4;Q92614;Q92614-5;H0YEV9	J3KNX9;Q92614-2;Q92614-3;Q92614-4;Q92614;Q92614-5	10;10;10;10;10;8;2	10;10;10;10;10;8;2	10;10;10;10;10;8;2	64023000	51466000	44747000	Unconventional myosin-XVIIIa	MYO18A	;;;;;	7	10	10	10	5	4	5	5	4	5	5	4	5	6.5	6.5	6.5	233.14	2054	2054;1723;2002;2039;2054;1581;197	1	65	0	15.719	3.4	2.4	3	44430000	56121000	45217000	47519000	0	1	2	12
J3KP15;Q01130;J3QL05;B4DN89;Q9BRL6-2;Q9BRL6	J3KP15;Q01130;J3QL05;B4DN89	7;7;6;6;2;2	7;7;6;6;2;2	7;7;6;6;2;2	1640800000	1782300000	1733200000	Serine/arginine-rich splicing factor 2	SRSF2	;;;	6	7	7	7	7	7	7	7	7	7	7	7	7	55.6	55.6	55.6	15.371	133	133;221;130;209;275;282	1	138	0	210.16	55.6	55.6	55.6	1291200000	1853500000	1943700000	1842700000	10	9	6	90
J3KPN1;Q96BS2;Q96BS2-3;Q96BS2-2;E9PQ58;H0YIX4	J3KPN1;Q96BS2;Q96BS2-3;Q96BS2-2	7;7;6;5;3;1	7;7;6;5;3;1	7;7;6;5;3;1	217480000	201630000	216000000	Calcineurin B homologous protein 3	TESC	;;;	6	7	7	7	5	3	6	5	3	6	5	3	6	30	30	30	30.289	267	267;214;187;163;135;81	1	76	0	24.602	21.3	15	25.1	290190000	224770000	137150000	264920000	4	3	3	44
J3KPP4;O95232;B4DJ96;D6RDI2;C9JL41;O95232-2;E7EN55;H0YA81;D6RHH0;H7C5U7;U3KQT3;H0YBV7;H0YAR4	J3KPP4;O95232;B4DJ96;D6RDI2	14;14;10;7;3;3;2;2;1;1;1;1;1	14;14;10;7;3;3;2;2;1;1;1;1;1	14;14;10;7;3;3;2;2;1;1;1;1;1	291870000	294980000	288670000	Luc7-like protein 3	LUC7L3	;;;	13	14	14	14	11	10	9	11	10	9	11	10	9	31.7	31.7	31.7	58.22	489	489;432;356;184;79;79;54;207;36;39;46;118;123	1	129	0	111.23	26	23.5	21.1	336650000	552180000	330410000	276130000	9	6	4	62
J3KPS0;Q9NXW2;Q9NXW2-2;V9GYN7	J3KPS0;Q9NXW2;Q9NXW2-2	4;4;4;1	4;4;4;1	4;4;4;1	50176000	51880000	49188000	DnaJ homolog subfamily B member 12	DNAJB12	;;	4	4	4	4	3	4	2	3	4	2	3	4	2	13.9	13.9	13.9	45.489	409	409;375;377;276	1	36	0	5.289	11.2	13.9	9.5	34642000	48910000	67861000	31768000	1	1	0	4
J3KPX7;Q99623;F5GY37;Q99623-2;F5GWA7;F5H3X6;F5H0C5;F5H2D2;U3KPZ5	J3KPX7;Q99623;F5GY37;Q99623-2;F5GWA7;F5H3X6	16;16;14;13;10;8;4;3;3	16;16;14;13;10;8;4;3;3	16;16;14;13;10;8;4;3;3	3747400000	3659500000	3836600000	Prohibitin-2	PHB2	;;;;;	9	16	16	16	14	15	15	14	15	15	14	15	15	59.9	59.9	59.9	33.402	299	299;299;267;261;261;213;112;87;103	1	244	0	323.31	54.8	54.5	54.5	3310500000	3938700000	4046300000	4039700000	15	16	14	179
J3KQ12;Q96G97;Q96G97-4;F8W7Q8;Q96G97-3;H0YF20;H7BYY0;H7C2D5;E9PIU3;H7BXM1	J3KQ12;Q96G97;Q96G97-4;F8W7Q8;Q96G97-3	3;3;3;2;2;1;1;1;1;1	3;3;3;2;2;1;1;1;1;1	3;3;3;2;2;1;1;1;1;1	0	36259000	0	Seipin	BSCL2	;;;;	10	3	3	3	1	2	1	1	2	1	1	2	1	5.6	5.6	5.6	51.286	464	464;398;462;223;287;52;79;150;226;277	1	20	0.00026062	3.2105	1.9	3.9	1.7	0	5557400	35686000	9334200	0	1	0	5
J3KQ32;Q9NTK5;Q9NTK5-3;Q9NTK5-2;C9JTK6;C9JCJ9	J3KQ32;Q9NTK5;Q9NTK5-3;Q9NTK5-2	24;24;16;14;7;6	24;24;16;14;7;6	24;24;16;14;7;6	1665800000	1605400000	1695300000	Obg-like ATPase 1	OLA1	;;;	6	24	24	24	19	19	19	19	19	19	19	19	19	65.6	65.6	65.6	46.937	416	416;396;278;238;116;103	1	295	0	69.965	58.4	56	57.2	1453400000	2040100000	1637000000	1777700000	11	11	15	158
J3KQ34;Q9H9Q2;J3QT73;Q9H9Q2-2;J3KQ41;Q9H9Q2-3	J3KQ34;Q9H9Q2;J3QT73;Q9H9Q2-2	3;3;2;2;1;1	3;3;2;2;1;1	3;3;2;2;1;1	46230000	47872000	38393000	COP9 signalosome complex subunit 7b	COPS7B	;;;	6	3	3	3	2	2	2	2	2	2	2	2	2	18.7	18.7	18.7	26.424	230	230;264;172;157;278;273	1	25	0	15.383	11.3	11.3	11.3	41691000	52062000	60037000	43455000	2	2	0	13
J3KQ48;Q9Y3E5	J3KQ48;Q9Y3E5	5;5	5;5	5;5	257770000	216440000	267900000	Peptidyl-tRNA hydrolase 2, mitochondrial	PTRH2	;	2	5	5	5	5	5	5	5	5	5	5	5	5	47.2	47.2	47.2	19.325	180	180;179	1	92	0	57.381	47.2	47.2	47.2	207980000	284490000	244150000	229710000	5	5	3	57
J3KQ73;Q14318;U3KQ64;Q14318-3;U3KQI1;M0R1Q0;M0R1S6	J3KQ73;Q14318;U3KQ64	10;9;5;4;2;1;1	10;9;5;4;2;1;1	1;0;0;0;0;0;0	351690000	343290000	365740000	Peptidyl-prolyl cis-trans isomerase FKBP8	FKBP8	;;	7	10	10	1	9	8	6	9	8	6	0	0	0	27.4	27.4	1.6	47.143	441	441;412;182;253;103;163;167	1	107	0	78.391	25.9	22.2	15.9	356350000	391350000	352440000	365650000	7	5	6	60
J3KQJ1;Q8NBJ7;C9JL30;A8MXB9;C9J660;Q8NBJ7-2;E9PBT8;H7C3B2;F8WA42;Q8NBJ7-3;J3QT17;Q8NBJ7-5;F8WEX5;E9PG02;F8WEV7;F8WES7;Q8NBJ7-4	J3KQJ1;Q8NBJ7;C9JL30;A8MXB9;C9J660;Q8NBJ7-2;E9PBT8;H7C3B2;F8WA42;Q8NBJ7-3;J3QT17;Q8NBJ7-5	6;6;5;5;5;5;4;4;4;4;3;3;2;2;1;1;1	6;6;5;5;5;5;4;4;4;4;3;3;2;2;1;1;1	6;6;5;5;5;5;4;4;4;4;3;3;2;2;1;1;1	201260000	227930000	233300000	Sulfatase-modifying factor 2	SUMF2	;;;;;;;;;;;	17	6	6	6	6	6	4	6	6	4	6	6	4	20	20	20	35.922	320	320;301;293;305;352;213;232;304;358;339;236;217;165;183;102;150;321	1	80	0	34.508	20	20	16.6	220970000	285050000	337600000	176100000	4	4	2	40
J3KQS6;Q9NWV8;M0QX07;M0R3F4;M0R2A4;M0R2K3;M0R193;M0R0I0;M0R2I2;M0QY17;Q9NWV8-3;M0QXG9;Q9NWV8-2	J3KQS6;Q9NWV8;M0QX07;M0R3F4;M0R2A4;M0R2K3;M0R193;M0R0I0;M0R2I2	5;5;4;3;3;3;3;3;3;2;2;1;1	5;5;4;3;3;3;3;3;3;2;2;1;1	5;5;4;3;3;3;3;3;3;2;2;1;1	64189000	73915000	57983000	BRISC and BRCA1-A complex member 1	BABAM1	;;;;;;;;	13	5	5	5	5	4	5	5	4	5	5	4	5	23.7	23.7	23.7	36.426	329	329;329;254;181;193;200;218;225;237;108;171;184;184	1	52	0	20.847	23.7	16.4	23.7	72916000	89799000	72114000	52077000	2	1	3	23
J3KQU9;B3KXW5;O43747;O43747-2;H3BNR4;H3BR36;H3BUN9;H3BRM7;H3BN71;B4DGE1;B3KNW1;H3BN75;H3BS13;H3BV30	J3KQU9;B3KXW5;O43747;O43747-2	17;17;17;17;7;5;5;3;3;3;2;1;1;1	17;17;17;17;7;5;5;3;3;3;2;1;1;1	17;17;17;17;7;5;5;3;3;3;2;1;1;1	527770000	460410000	542100000	AP-1 complex subunit gamma-1	AP1G1	;;;	14	17	17	17	14	15	15	14	15	15	14	15	15	27.8	27.8	27.8	91.695	825	825;845;822;825;236;187;208;139;144;176;247;53;85;91	1	234	0	115.47	22.2	23.3	24.7	489290000	577710000	578860000	592690000	11	11	13	126
J3KR97;Q9BTW9;Q9BTW9-4;Q9BTW9-5;I3L439;I3L163;C9J1U4;I3L4D2;I3L3H4;I3L131;I3L143;I3L0V3;I3L500;Q9BTW9-3;I3L1S3;I3L120	J3KR97;Q9BTW9;Q9BTW9-4;Q9BTW9-5	14;14;14;8;5;4;4;3;3;3;3;3;3;3;2;2	14;14;14;8;5;4;4;3;3;3;3;3;3;3;2;2	14;14;14;8;5;4;4;3;3;3;3;3;3;3;2;2	170460000	148560000	160350000	Tubulin-specific chaperone D	TBCD	;;;	16	14	14	14	8	9	9	8	9	9	8	9	9	15.6	15.6	15.6	136.55	1230	1230;1192;1248;757;256;244;311;109;134;141;211;237;251;151;117;260	1	124	0	38.056	8.2	9.4	10	124620000	188130000	178990000	143490000	3	5	3	48
J3KRX0;P34810-2;P34810-3;P34810	J3KRX0;P34810-2;P34810-3;P34810	1;1;1;1	1;1;1;1	1;1;1;1	0	0	121350000	Macrosialin	CD68	;;;	4	1	1	1	1	1	1	1	1	1	1	1	1	26.4	26.4	26.4	13.18	121	121;297;327;354	1	14	0	5.0069	26.4	26.4	26.4	37369000	42971000	56710000	114800000	1	0	2	7
J3KS15;Q14197	J3KS15;Q14197	3;3	3;3	3;3	62692000	73852000	82591000	Peptidyl-tRNA hydrolase ICT1, mitochondrial	ICT1	;	2	3	3	3	2	3	3	2	3	3	2	3	3	18.2	18.2	18.2	21.905	192	192;206	1	34	0	15.391	13	18.2	18.2	90433000	48136000	85959000	92355000	1	1	1	16
J3KSY6;Q8TCD5;J3KSX6;J3KRC4;J3KSF0;J3QQX8;Q8TCD5-2	J3KSY6;Q8TCD5;J3KSX6;J3KRC4	3;3;2;2;1;1;1	3;3;2;2;1;1;1	3;3;2;2;1;1;1	66157000	76658000	66074000	5(3)-deoxyribonucleotidase, cytosolic type	NT5C	;;;	7	3	3	3	3	2	2	3	2	2	3	2	2	26.1	26.1	26.1	13.618	115	115;201;153;182;39;87;117	1	31	0.00027027	3.6882	26.1	18.3	18.3	20271000	116860000	45632000	31271000	1	1	2	8
J3KTA4;P17844;B4DLW8;J3KRZ1;J3QSF1;J3QRQ7;J3KRX8;J3QR02;J3QRN5;X6RLV5;J3QLG9;J3QR62	J3KTA4;P17844;B4DLW8	31;31;28;12;11;10;5;4;2;2;1;1	30;30;27;11;10;10;5;4;2;2;1;1	22;22;19;5;6;8;5;4;2;2;1;1	4048500000	3977700000	4224100000	Probable ATP-dependent RNA helicase DDX5	DDX5	;;	12	31	30	22	27	29	28	26	28	27	20	22	20	59.6	57.8	45.6	69.086	614	614;614;535;166;153;212;120;99;65;96;46;52	1	447	0	231.68	48.7	56	54.7	3550900000	4241400000	4221900000	4564500000	30	25	27	318
J3KTD2;C9JTR3;Q86VV8-2;Q86VV8-4;Q86VV8-3;Q86VV8	J3KTD2;C9JTR3;Q86VV8-2;Q86VV8-4;Q86VV8-3;Q86VV8	2;1;1;1;1;1	2;1;1;1;1;1	2;1;1;1;1;1	646620000	630560000	588110000	Rotatin	RTTN	;;;;;	6	2	2	2	2	2	2	2	2	2	2	2	2	3	3	3	56.318	500	500;1593;601;879;2200;2226	1	35	0.0065314	1.934	3	3	3	607140000	735410000	692550000	589550000	1	1	1	12
J3KTI2;Q9BRT3	J3KTI2;Q9BRT3	2;2	2;2	2;2	0	0	51165000	Migration and invasion enhancer 1	MIEN1	;	2	2	2	2	0	2	2	0	2	2	0	2	2	18.1	18.1	18.1	12.401	116	116;115	1	11	0.00027064	3.7052	0	18.1	18.1	58540000	0	60011000	52906000	0	1	0	2
J3KTL2;Q07955;Q07955-3;Q07955-2;J3KSR8;J3QQV5;J3KSW7	J3KTL2;Q07955;Q07955-3;Q07955-2	15;15;14;14;6;5;5	15;15;14;14;6;5;5	14;14;13;13;6;5;5	1292100000	1254000000	1316800000	Serine/arginine-rich splicing factor 1	SRSF1	;;;	7	15	15	14	15	14	15	15	14	15	14	13	14	49.8	49.8	47	28.329	253	253;248;201;292;143;65;73	1	227	0	70.516	49.8	49	49.8	1402800000	1532800000	1186200000	1253500000	20	15	17	201
J3KTL7;Q5QPR4;J3QR29;Q5QPR3;J3QKR5;J3QR44;P21127-6;P21127-9;Q9UQ88-4;P21127-8;Q9UQ88-3;Q9UQ88-2;P21127-3;P21127-2;Q9UQ88;P21127;J3QL65;Q9UQ88-10;P21127-12;P21127-4;P21127-5;P21127-10;Q9UQ88-5;Q9UQ88-9;X6R529;E9PFJ2;G8JLH1;J3KS35;E7ESP2	J3KTL7;Q5QPR4;J3QR29;Q5QPR3;J3QKR5;J3QR44;P21127-6;P21127-9;Q9UQ88-4;P21127-8;Q9UQ88-3;Q9UQ88-2;P21127-3;P21127-2;Q9UQ88;P21127;J3QL65;Q9UQ88-10;P21127-12;P21127-4;P21127-5;P21127-10;Q9UQ88-5;Q9UQ88-9	12;12;12;12;12;12;12;12;12;12;12;12;12;12;12;12;11;11;11;11;11;11;10;7;1;1;1;1;1	12;12;12;12;12;12;12;12;12;12;12;12;12;12;12;12;11;11;11;11;11;11;10;7;1;1;1;1;1	9;9;9;9;9;9;9;9;9;9;9;9;9;9;9;9;8;8;8;8;8;8;7;7;1;1;1;1;1	241750000	201990000	234100000	Cyclin-dependent kinase 11B;Cyclin-dependent kinase 11A	CDC2L1;CDK11A;CDK11B	;;;;;;;;;;;;;;;;;;;;;;;	29	12	12	9	9	10	11	9	10	11	7	7	8	19	19	12.5	85.243	738	738;746;772;779;783;785;738;748;770;772;779;780;781;782;783;795;618;439;439;461;526;565;397;531;75;151;232;407;420	1	117	0	27.184	14.1	16.1	17.6	278930000	293560000	272970000	319050000	3	1	2	42
J3QK89;Q8IWX8	J3QK89;Q8IWX8	4;4	4;4	4;4	106360000	103800000	106640000	Calcium homeostasis endoplasmic reticulum protein	CHERP	;	2	4	4	4	4	4	4	4	4	4	4	4	4	5.8	5.8	5.8	104.93	927	927;916	1	67	0	17.126	5.8	5.8	5.8	133940000	132700000	130850000	110990000	1	2	0	20
J3QK90;Q9UNZ2;Q9UNZ2-5;Q9UNZ2-4;F2Z2K0;Q9UNZ2-6;R4GNE6;G3V4V8;R4GMY2	J3QK90;Q9UNZ2;Q9UNZ2-5;Q9UNZ2-4;F2Z2K0;Q9UNZ2-6	16;16;16;15;11;11;3;1;1	16;16;16;15;11;11;3;1;1	16;16;16;15;11;11;3;1;1	468170000	394190000	443480000	NSFL1 cofactor p47	NSFL1C	;;;;;	9	16	16	16	14	11	13	14	11	13	14	11	13	58.9	58.9	58.9	40.844	372	372;370;372;339;274;259;105;35;71	1	162	0	78.737	53.5	44.1	47	425710000	567200000	382650000	507440000	7	7	7	79
J3QL71;Q96FV2-2;Q96FV2;J3QQM9;J3QRJ1	J3QL71;Q96FV2-2;Q96FV2;J3QQM9	3;3;3;2;1	3;3;3;2;1	3;3;3;2;1	0	38350000	0	Secernin-2	SCRN2	;;;	5	3	3	3	1	2	1	1	2	1	1	2	1	12.9	12.9	12.9	47.493	433	433;378;425;269;271	1	21	0	9.3319	4.6	11.3	4.6	33447000	28527000	33354000	23570000	1	1	1	11
J3QLD9;E7EMK3;Q14254;K7EKW9	J3QLD9;E7EMK3;Q14254;K7EKW9	7;7;7;5	7;7;7;5	7;7;7;5	123110000	95300000	88733000	Flotillin-2	FLOT2	;;;	4	7	7	7	5	3	5	5	3	5	5	3	5	16.1	16.1	16.1	47.142	428	428;483;428;249	1	60	0	13.524	12.1	7.5	12.1	89815000	117210000	76715000	94979000	3	2	2	27
J3QLE5;P14678-2;P63162;P14678;B3KVR1;P14678-3;J3KRY3;S4R3P3	J3QLE5;P14678-2;P63162;P14678;B3KVR1;P14678-3;J3KRY3;S4R3P3	8;8;8;8;8;8;5;5	8;8;8;8;8;8;5;5	8;8;8;8;8;8;5;5	1465500000	1234100000	1259200000	Small nuclear ribonucleoprotein-associated proteins B and B;Small nuclear ribonucleoprotein-associated protein N	SNRPN;SNRPB	;;;;;;;	8	8	8	8	8	7	8	8	7	8	8	7	8	35.5	35.5	35.5	17.546	169	169;231;240;240;244;289;59;70	1	163	0	52.125	35.5	34.9	35.5	1505400000	1298400000	1348300000	1371000000	10	9	9	109
J3QLR8;Q9Y3D9	J3QLR8;Q9Y3D9	5;5	5;5	5;5	62253000	0	0	28S ribosomal protein S23, mitochondrial	MRPS23	;	2	5	5	5	4	3	3	4	3	3	4	3	3	33.6	33.6	33.6	17.517	152	152;190	1	40	0	5.9897	27	16.4	23.7	50781000	58218000	54380000	65336000	2	0	0	7
J3QQ67;Q07020;G3V203;H0YHA7;Q07020-2;F8VYV2;F8VUA6;F8VXR6	J3QQ67;Q07020;G3V203;H0YHA7;Q07020-2;F8VYV2;F8VUA6	9;9;8;8;8;7;6;1	9;9;8;8;8;7;6;1	9;9;8;8;8;7;6;1	4254800000	4411000000	4180000000	60S ribosomal protein L18	RPL18	;;;;;;	8	9	9	9	9	8	8	9	8	8	9	8	8	42.1	42.1	42.1	21.728	190	190;188;164;167;159;133;130;84	1	171	0	76.999	42.1	40	35.3	4049600000	4618300000	4236700000	4203800000	10	5	9	93
J3QQJ0;Q9UHR5-2;Q9UHR5;X6R3T8;J3QLH3;J3QLM2;J3KRR6;F5H478;J3KRU5;J3KS14	J3QQJ0;Q9UHR5-2;Q9UHR5;X6R3T8;J3QLH3;J3QLM2;J3KRR6;F5H478;J3KRU5	4;4;4;3;3;2;2;2;2;1	4;4;4;3;3;2;2;2;2;1	4;4;4;3;3;2;2;2;2;1	0	43906000	0	SAP30-binding protein	SAP30BP	;;;;;;;;	10	4	4	4	3	3	1	3	3	1	3	3	1	16.6	16.6	16.6	35.772	325	325;292;308;235;248;93;109;168;179;104	1	24	0	6.862	12	11.7	3.7	37113000	57279000	46486000	27048000	1	0	0	2
J3QQS1;J3QLS3;Q9Y2R9;J3KSI8;J3QKW2	J3QQS1;J3QLS3;Q9Y2R9;J3KSI8;J3QKW2	4;4;4;3;3	4;4;4;3;3	4;4;4;3;3	0	35767000	37075000	28S ribosomal protein S7, mitochondrial	MRPS7	;;;;	5	4	4	4	3	2	3	3	2	3	3	2	3	29.1	29.1	29.1	19.903	172	172;271;242;156;183	1	25	0	5.7753	21.5	14.5	22.7	40257000	44478000	33982000	52216000	1	0	0	6
J3QQT2;J3KRX5;P18621;P18621-3;J3QLC8;P18621-2;J3QS96;J3KRB3;J3KSJ0	J3QQT2;J3KRX5;P18621;P18621-3;J3QLC8;P18621-2;J3QS96;J3KRB3	8;8;8;8;7;7;6;5;1	8;8;8;8;7;7;6;5;1	8;8;8;8;7;7;6;5;1	2292000000	2325800000	2900400000	60S ribosomal protein L17	RPL17	;;;;;;;	9	8	8	8	7	7	8	7	7	8	7	7	8	50.3	50.3	50.3	19.786	171	171;174;184;228;174;146;138;105;56	1	154	0	87.92	45	39.8	50.3	2561400000	2278500000	2456300000	3021000000	10	11	12	117
J3QR09;J3KTE4;P84098;J3QL15	J3QR09;J3KTE4;P84098	9;9;9;4	9;9;9;4	9;9;9;4	3046400000	2640500000	3127300000	Ribosomal protein L19;60S ribosomal protein L19	RPL19	;;	4	9	9	9	9	9	9	9	9	9	9	9	9	35.8	35.8	35.8	23.134	193	193;194;196;128	1	182	0	77.329	35.8	35.8	35.8	2673300000	3155200000	3204100000	3466200000	15	10	12	129
J3QRG6;P42771;P42771-4;K7ES20;G3XAG3;K7ENC6;P42771-2;P42771-3;P42772	J3QRG6;P42771;P42771-4;K7ES20;G3XAG3;K7ENC6;P42771-2;P42771-3	6;6;6;3;3;3;3;3;2	6;6;6;3;3;3;3;3;2	6;6;6;3;3;3;3;3;2	1144300000	1070700000	1087800000	Cyclin-dependent kinase inhibitor 2A	CDKN2A	;;;;;;;	9	6	6	6	5	6	5	5	6	5	5	6	5	66.7	66.7	66.7	14.968	138	138;156;167;104;116;121;105;116;138	1	113	0	53.887	50.7	66.7	50.7	1077200000	1262700000	1212700000	1199900000	8	4	6	71
J3QRS3;P19105;O14950;J3KTJ1	J3QRS3;P19105;O14950;J3KTJ1	8;8;8;4	8;8;8;4	3;3;3;0	1173600000	1043700000	1266800000	Myosin regulatory light chain 12A;Myosin regulatory light chain 12B	MYL12A;MYL12B	;;;	4	8	8	3	7	6	6	7	6	6	3	3	3	60.5	60.5	23.2	20.457	177	177;171;172;114	1	147	0	247.5	55.4	49.2	49.2	1166100000	1359700000	1175800000	1353800000	14	10	10	133
J3QRS9;X6R4W8;O43670-2;O43670;O43670-4;O43670-3;J3KS31;J3QS27;J3KTL1;J3KRB6;J3KRW6;H0Y3M2	J3QRS9;X6R4W8;O43670-2;O43670;O43670-4;O43670-3;J3KS31	5;5;5;5;5;4;3;1;1;1;1;1	5;5;5;5;5;4;3;1;1;1;1;1	5;5;5;5;5;4;3;1;1;1;1;1	414880000	308330000	375190000	BUB3-interacting and GLEBS motif-containing protein ZNF207	ZNF207	;;;;;;	12	5	5	5	3	4	4	3	4	4	3	4	4	10.8	10.8	10.8	52.541	493	493;497;463;478;494;395;341;46;74;93;95;198	1	53	0	17.753	6.5	8.3	8.3	359050000	327110000	217910000	365360000	3	2	3	41
J3QRU4;F8WCA0;L7N2F9;P63027	J3QRU4;F8WCA0;L7N2F9;P63027	4;4;4;4	2;2;2;2	1;1;1;1	39625000	34303000	33204000	Vesicle-associated membrane protein 2	VAMP2	;;;	4	4	2	1	3	3	3	1	1	1	1	1	1	61.1	39.8	14.2	12.251	113	113;118;121;116	1	23	0.00026178	3.261	35.4	35.4	35.4	17379000	42809000	35632000	33049000	2	1	1	16
J3QRU8;Q9Y2X7;Q9Y2X7-3;J3QLH1;J3QQI0;F8W822;Q14161-2	J3QRU8;Q9Y2X7;Q9Y2X7-3	5;5;5;2;1;1;1	4;4;4;2;1;0;0	4;4;4;2;1;0;0	64881000	0	0	ARF GTPase-activating protein GIT1	GIT1	;;	7	5	4	4	4	3	2	3	2	1	3	2	1	10.8	9.7	9.7	76.805	694	694;761;770;228;149;421;471	1	22	0	22.93	9.5	5.2	2.4	17470000	75393000	17937000	0	2	1	1	10
J3QRZ2;J3QLB7;J3QKS6;J3QRG5;J3KSJ5;Q9BQA9-2;Q9BQA9;J3QKZ6;J3KTI1;J3KSB6;J3KS78;J3QS53;J3KTF4	J3QRZ2;J3QLB7;J3QKS6;J3QRG5;J3KSJ5;Q9BQA9-2;Q9BQA9;J3QKZ6;J3KTI1;J3KSB6;J3KS78;J3QS53;J3KTF4	2;2;2;2;2;2;2;1;1;1;1;1;1	2;2;2;2;2;2;2;1;1;1;1;1;1	2;2;2;2;2;2;2;1;1;1;1;1;1	0	0	36670000	Uncharacterized protein C17orf62	C17orf62	;;;;;;;;;;;;	13	2	2	2	1	1	2	1	1	2	1	1	2	18.8	18.8	18.8	13.235	117	117;119;130;148;190;173;187;51;78;78;80;85;88	1	25	0	4.0213	12	12	18.8	36305000	36063000	26113000	31675000	0	1	1	11
J3QS48;I3L295;J3KTK8;J3QQZ4;J3KT75;J3QW43;J3QRD5;B4DT74;O75352;I3L405;I3L261;I3L1D2;J3KSI4;I3L4E0	J3QS48;I3L295;J3KTK8;J3QQZ4;J3KT75;J3QW43;J3QRD5;B4DT74;O75352;I3L405;I3L261;I3L1D2	3;3;3;3;3;3;3;3;3;2;2;2;1;1	3;3;3;3;3;3;3;3;3;2;2;2;1;1	3;3;3;3;3;3;3;3;3;2;2;2;1;1	82847000	123850000	121430000	Mannose-P-dolichol utilization defect 1 protein	MPDU1	;;;;;;;;;;;	14	3	3	3	3	3	3	3	3	3	3	3	3	41.6	41.6	41.6	10.978	101	101;109;116;152;154;192;193;186;247;54;61;61;52;75	1	35	0	6.4381	41.6	41.6	41.6	102150000	103950000	110740000	116620000	1	1	1	8
J3QTA2;Q99933-4;Q99933-3;Q99933;Q99933-2;C9JYK5;F1LLU6	J3QTA2;Q99933-4;Q99933-3;Q99933;Q99933-2	8;8;8;8;7;3;1	8;8;8;8;7;3;1	8;8;8;8;7;3;1	151610000	105760000	118940000	BAG family molecular chaperone regulator 1	BAG1	;;;;	7	8	8	8	6	5	5	6	5	5	6	5	5	30.4	30.4	30.4	38.76	345	345;230;274;345;311;150;160	1	75	0	33.503	23.2	20.3	20.3	122520000	169820000	120960000	116640000	3	3	2	28
J9JID7;Q03252	J9JID7;Q03252	16;16	12;12	12;12	97808000	90197000	116100000	Lamin-B2	LMNB2	;	2	16	12	12	11	8	7	7	5	4	7	5	4	25.2	21.1	21.1	69.948	620	620;600	1	82	0	16.366	17.1	11.5	9.7	80559000	104510000	74595000	63707000	2	1	2	33
J9JIE6;Q9UM00-2;Q9UM00;J3QQY2;J3KS45;J3KTQ7	J9JIE6;Q9UM00-2;Q9UM00;J3QQY2;J3KS45	4;4;4;3;2;1	4;4;4;3;2;1	4;4;4;3;2;1	540580000	635170000	686990000	Transmembrane and coiled-coil domain-containing protein 1	TMCO1	;;;;	6	4	4	4	4	4	4	4	4	4	4	4	4	19.2	19.2	19.2	27.079	239	239;169;188;104;143;152	1	60	0	41.184	19.2	19.2	19.2	612470000	610320000	649650000	730030000	3	3	4	44
K4DI93;Q13620-1;Q13620;Q13620-3;A6NE76	K4DI93;Q13620-1;Q13620;Q13620-3	32;32;32;31;10	32;32;32;31;10	20;20;20;19;7	783050000	780660000	801960000	Cullin-4B	CUL4B	;;;	5	32	32	20	20	24	22	20	24	22	14	16	14	34	34	22.1	102.75	900	900;895;913;717;234	1	335	0	103.12	21.8	25.8	24.7	724890000	712480000	892770000	761950000	13	15	14	166
K7EIE8;O95983-2;O95983	K7EIE8;O95983-2;O95983	3;3;3	3;3;3	3;3;3	0	36852000	0	Methyl-CpG-binding domain protein 3	MBD3	;;	3	3	3	3	2	3	2	2	3	2	2	3	2	16.6	16.6	16.6	26.322	235	235;259;291	1	23	0	7.7488	10.6	16.6	10.6	23336000	37296000	49444000	38234000	1	1	1	14
K7EIG1;O75153;I3L318;I3L4B5	K7EIG1;O75153	16;16;2;1	16;16;2;1	2;2;0;0	217320000	211270000	222080000	Clustered mitochondria protein homolog	CLUH	;	4	16	16	2	10	10	11	10	10	11	1	2	2	16.5	16.5	1.9	140.49	1251	1251;1309;164;160	1	130	0	25.392	10.1	10.2	10.9	299250000	147620000	146870000	307070000	6	4	2	61
K7EJC8;E9PCW1;O95249;F6RU00;B4DQA8;G5E9T8;O95249-2	K7EJC8;E9PCW1;O95249;F6RU00;B4DQA8;G5E9T8;O95249-2	2;2;2;1;1;1;1	2;2;2;1;1;1;1	2;2;2;1;1;1;1	30847000	32816000	0	Golgi SNAP receptor complex member 1	GOSR1	;;;;;;	7	2	2	2	2	2	1	2	2	1	2	2	1	8.5	8.5	8.5	26.989	236	236;248;250;81;174;255;185	1	22	0.009957	1.6427	8.5	8.5	5.5	26380000	34973000	38811000	22162000	0	0	0	2
K7EJQ7;Q9BY50	K7EJQ7;Q9BY50	4;4	4;4	4;4	72513000	80121000	77169000	Signal peptidase complex catalytic subunit SEC11;Signal peptidase complex catalytic subunit SEC11C	SEC11C	;	2	4	4	4	2	4	2	2	4	2	2	4	2	24.2	24.2	24.2	18.095	161	161;192	1	33	0	8.5929	18.6	24.2	18.6	88049000	49595000	109260000	52420000	0	2	1	18
K7EKE6;K7EJE8;P36776-2;P36776;P36776-3;K7ER27;K7ERR6;K7ER56;K7EQF8	K7EKE6;K7EJE8;P36776-2;P36776;P36776-3	32;31;31;31;29;10;7;3;2	32;31;31;31;29;10;7;3;2	32;31;31;31;29;10;7;3;2	1206100000	1182300000	1282500000	Lon protease homolog, mitochondrial	LONP1	;;;;	9	32	32	32	23	23	25	23	23	25	23	23	25	52.2	52.2	52.2	95.179	845	845;829;895;959;763;242;264;210;185	1	338	0	136.99	39.5	39.2	39.2	1083900000	1943100000	1350200000	1301700000	15	19	18	178
K7EKI0;Q92817	K7EKI0;Q92817	3;3	3;3	3;3	0	14874000	12147000	Envoplakin	EVPL	;	2	3	3	3	2	3	3	2	3	3	2	3	3	1.5	1.5	1.5	233.83	2055	2055;2033	1	34	0.0036049	2.225	1	1.5	1.5	18773000	8813700	15866000	15021000	0	1	0	6
K7EKI8;O60437;K7EQ71	K7EKI8;O60437;K7EQ71	27;27;20	27;27;20	27;27;20	221690000	211840000	227290000	Periplakin	PPL	;;	3	27	27	27	17	12	17	17	12	17	17	12	17	17.6	17.6	17.6	204.49	1754	1754;1756;1115	1	186	0	45.38	11.7	7.8	10.7	235590000	235450000	183460000	264930000	7	4	3	64
K7ELC2;P62841;K7EM56;K7EQJ5;K7EJ78;S4R456	K7ELC2;P62841;K7EM56;K7EQJ5;K7EJ78;S4R456	8;8;7;7;5;4	8;8;7;7;5;4	8;8;7;7;5;4	2316700000	2078000000	2049900000	40S ribosomal protein S15	RPS15	;;;;;	6	8	8	8	8	7	6	8	7	6	8	7	6	66.4	66.4	66.4	17.723	152	152;145;112;141;129;68	1	174	0	83.326	66.4	52	51.3	1798800000	2713300000	2358300000	2392900000	11	11	9	134
K7ELG0;Q96R06	K7ELG0;Q96R06	1;1	1;1	1;1	0	7870300	0	Sperm-associated antigen 5	SPAG5	;	2	1	1	1	0	1	0	0	1	0	0	1	0	6.5	6.5	6.5	22.05	185	185;1193	1	3	0.0033759	2.2617	0	6.5	0	0	0	8332800	0	0	1	0	3
K7ELQ9;Q6UW68;K7EM09;K7EPR0;K7ER05;K7EJQ9	K7ELQ9;Q6UW68;K7EM09;K7EPR0	3;3;2;2;1;1	3;3;2;2;1;1	3;3;2;2;1;1	149700000	0	135530000	Transmembrane protein 205	TMEM205	;;;	6	3	3	3	1	2	2	1	2	2	1	2	2	22.9	22.9	22.9	19.27	170	170;189;120;128;88;107	1	37	0	21.258	10	17.6	15.3	134310000	115870000	196130000	162800000	1	0	0	12
K7EM18;P41567;K7EQP2	K7EM18;P41567	9;9;1	9;9;1	4;4;0	601880000	619210000	583090000	Eukaryotic translation initiation factor 1	EIF1	;	3	9	9	4	9	8	8	9	8	8	4	3	3	71.9	71.9	38.8	13.607	121	121;113;53	1	108	0	211.48	71.9	71.9	71.9	565050000	731270000	612050000	673790000	9	5	8	67
K7EM62;O95427	K7EM62;O95427	1;1	1;1	1;1	136930000	59249000	176060000	GPI ethanolamine phosphate transferase 1	PIGN	;	2	1	1	1	1	1	1	1	1	1	1	1	1	6.2	6.2	6.2	29.306	257	257;931	1	22	0.0024655	2.519	6.2	6.2	6.2	198620000	169990000	46481000	137800000	1	1	1	8
K7EM93;K7EIL9;K7ES22;K7ELW9;Q9NVP2	K7EM93;K7EIL9;K7ES22;K7ELW9;Q9NVP2	2;1;1;1;1	2;1;1;1;1	2;1;1;1;1	50840000	0	0	Histone chaperone ASF1B	ASF1B	;;;;	5	2	2	2	2	0	1	2	0	1	2	0	1	75	75	75	5.3901	48	48;81;143;165;202	1	13	0.0029261	2.388	75	0	33.3	7517500	54814000	0	40057000	1	0	0	5
K7EMV3;B4DEB1;K7EK07;K7ES00;Q71DI3;Q16695;P84243;P68431;K7EP01;Q5TEC6;Q6NXT2	K7EMV3;B4DEB1;K7EK07;K7ES00;Q71DI3;Q16695;P84243;P68431;K7EP01;Q5TEC6;Q6NXT2	3;3;3;3;3;3;3;3;2;2;2	3;3;3;3;3;3;3;3;2;2;2	3;3;3;3;3;3;3;3;2;2;2	1766300000	1063500000	866340000	Histone H3;Histone H3.2;Histone H3.1t;Histone H3.3;Histone H3.1;Histone H3.3C	H3F3B;H3F3A;HIST2H3A;HIST3H3;HIST1H3A;HIST2H3PS2;H3F3C	;;;;;;;;;;	11	3	3	3	2	3	3	2	3	3	2	3	3	25	25	25	10.334	92	92;123;132;151;136;136;136;136;113;136;135	1	54	0	36.757	17.4	25	25	2420700000	1551200000	1231100000	825480000	3	4	3	36
K7EMY9;K7EPM4;K7EQR7;D6W5Y5;Q14011;B4E2X2;K7ELV6;K7ENX8;K7EJV5;K7ELT6;K7ER40;K7EQX4;K7ENN6;K7EIF7;K7EQL0;K7ELL4;B3KT17	K7EMY9;K7EPM4;K7EQR7;D6W5Y5;Q14011;B4E2X2;K7ELV6;K7ENX8;K7EJV5;K7ELT6;K7ER40	3;3;3;3;3;3;2;2;2;2;2;1;1;1;1;1;1	3;3;3;3;3;3;2;2;2;2;2;1;1;1;1;1;1	3;3;3;3;3;3;2;2;2;2;2;1;1;1;1;1;1	40428000	61478000	34783000	Cold-inducible RNA-binding protein	CIRBP	;;;;;;;;;;	17	3	3	3	3	3	2	3	3	2	3	3	2	25.8	25.8	25.8	17.045	159	159;168;202;297;172;263;70;89;105;135;173;32;37;60;79;85;244	1	35	0	7.6846	25.8	25.8	12.6	27808000	49723000	115880000	22626000	4	1	0	15
K7ENB4;K7EKX7;K7EJ20;P36969-2;P36969;R4GNE4;K7ERP4	K7ENB4;K7EKX7;K7EJ20;P36969-2;P36969;R4GNE4;K7ERP4	4;4;4;4;4;3;3	4;4;4;4;4;3;3	4;4;4;4;4;3;3	73758000	76422000	63809000	Glutathione peroxidase;Phospholipid hydroperoxide glutathione peroxidase, mitochondrial	GPX4	;;;;;;	7	4	4	4	3	3	4	3	3	4	3	3	4	28.9	28.9	28.9	19.944	180	180;194;260;170;197;145;155	1	41	0	10.802	22.8	22.8	28.9	46133000	77750000	76531000	55071000	1	1	4	22
K7ENL2;K7EMC9;Q969T9;K7EIJ0;B4DFG2;A6NG10;K7EIN1;K7ESN4;K7EIK1	K7ENL2;K7EMC9;Q969T9;K7EIJ0;B4DFG2;A6NG10	4;4;4;3;3;3;1;1;1	4;4;4;3;3;3;1;1;1	4;4;4;3;3;3;1;1;1	98731000	0	0	WW domain-binding protein 2	WBP2	;;;;;	9	4	4	4	3	2	2	3	2	2	3	2	2	22.1	22.1	22.1	24.71	231	231;257;261;167;216;239;114;152;205	1	32	0	9.8638	22.1	4.3	8.2	17057000	149370000	42845000	12283000	2	0	1	12
K7ENL3;P40763;P40763-2;G8JLH9;K7EP08	K7ENL3;P40763;P40763-2;G8JLH9	24;24;23;19;3	24;24;23;19;3	24;24;23;19;3	1264500000	1286300000	1357700000	Signal transducer and activator of transcription 3;Signal transducer and activator of transcription	STAT3	;;;	5	24	24	24	21	20	20	21	20	20	21	20	20	51.9	51.9	51.9	83.125	722	722;770;769;672;84	1	359	0	321.62	43.9	44.2	41.6	1138000000	1862000000	1297100000	1384400000	21	18	21	215
K7ENL4;J3QL63;J3QL47;B4E0Q0;Q96ET8-3;J3KS67;C9JYS5;Q9NYZ1	K7ENL4;J3QL63;J3QL47;B4E0Q0;Q96ET8-3;J3KS67;C9JYS5;Q9NYZ1	1;1;1;1;1;1;1;1	1;1;1;1;1;1;1;1	1;1;1;1;1;1;1;1	0	0	35797000	Golgi apparatus membrane protein TVP23 homolog;Golgi apparatus membrane protein TVP23 homolog B	TVP23B;TVP23C	;;;;;;;	8	1	1	1	1	1	1	1	1	1	1	1	1	9.1	9.1	9.1	15.323	132	132;141;141;185;203;203;205;205	1	17	0.0074074	1.859	9.1	9.1	9.1	20200000	11762000	25492000	35837000	0	0	1	5
K7ENR6;V9GYH7;Q969U7;V9GZ55;K7ER45	K7ENR6;V9GYH7;Q969U7;V9GZ55	8;8;8;7;2	8;8;8;7;2	8;8;8;7;2	304800000	377610000	304160000	Proteasome assembly chaperone 2	PSMG2	;;;	5	8	8	8	8	8	8	8	8	8	8	8	8	28.3	28.3	28.3	26.696	240	240;233;264;209;98	1	111	0	20.691	28.3	28.3	28.3	355690000	352370000	406010000	324850000	5	4	4	62
K7EQ02;Q96EP5-2;Q96EP5	K7EQ02;Q96EP5-2;Q96EP5	9;9;9	9;9;9	9;9;9	420770000	393250000	471920000	DAZ-associated protein 1	DAZAP1	;;	3	9	9	9	9	8	8	9	8	8	9	8	8	60.9	60.9	60.9	24.805	225	225;378;407	1	140	0	33.518	60.9	56	54.2	298190000	496990000	496630000	526620000	5	6	7	57
K7EQ03;K7EP90;Q9BTD8-4;Q9BTD8-2;Q9BTD8-3;Q9BTD8;K7ER08	K7EQ03;K7EP90;Q9BTD8-4;Q9BTD8-2;Q9BTD8-3;Q9BTD8;K7ER08	4;4;4;4;4;4;3	4;4;4;4;4;4;3	4;4;4;4;4;4;3	74217000	71237000	75773000	RNA-binding protein 42	RBM42	;;;;;;	7	4	4	4	4	4	4	4	4	4	4	4	4	10.6	10.6	10.6	44.638	426	426;458;446;450;451;480;386	1	48	0	23.917	10.6	10.6	10.6	76444000	91456000	78517000	81192000	2	4	4	25
K7ER15;Q9H0R4;K7EMY7;Q9H0R4-2;K7EJQ8;K7ENF3;K7EQD2	K7ER15;Q9H0R4;K7EMY7;Q9H0R4-2	3;3;2;2;1;1;1	3;3;2;2;1;1;1	3;3;2;2;1;1;1	31863000	33307000	34501000	Haloacid dehalogenase-like hydrolase domain-containing protein 2	HDHD2	;;;	7	3	3	3	3	3	3	3	3	3	3	3	3	19.6	19.6	19.6	22.49	204	204;259;146;169;122;131;132	1	32	0	9.7303	19.6	19.6	19.6	42120000	34685000	39235000	37382000	3	2	3	25
K7ERC8;Q06136;K7EQS7;B4DMX0	K7ERC8;Q06136;K7EQS7;B4DMX0	4;4;2;2	4;4;2;2	4;4;2;2	85214000	0	136050000	3-ketodihydrosphingosine reductase	KDSR	;;;	4	4	4	4	2	2	2	2	2	2	2	2	2	29.1	29.1	29.1	22.62	203	203;332;155;268	1	28	0	9.5632	13.3	13.3	14.8	72156000	68408000	65476000	155310000	2	1	1	13
K7ERD8;Q15555-2;G5E9I6;Q15555-3;Q15555;K7EL66;Q15555-4;M0QX52;K7ENB3	K7ERD8;Q15555-2;G5E9I6;Q15555-3;Q15555;K7EL66;Q15555-4;M0QX52	8;8;8;8;8;7;7;5;2	8;8;8;8;8;7;7;5;2	7;7;7;7;7;6;6;4;1	167700000	239470000	118550000	Microtubule-associated protein RP/EB family member 2	MAPRE2	;;;;;;;	9	8	8	7	7	5	6	7	5	6	6	4	5	39.7	39.7	34.5	21.594	194	194;259;284;315;327;134;274;127;78	1	97	0	14.831	39.2	24.2	30.4	198780000	188750000	205950000	151060000	2	1	4	35
K7ES61;Q9BYD3;X6RAY8;Q9BYD3-2;K7ELQ0;K7EKI4;K7ELF1;K7EJ73	K7ES61;Q9BYD3;X6RAY8;Q9BYD3-2;K7ELQ0;K7EKI4;K7ELF1	6;6;5;5;4;3;3;1	6;6;5;5;4;3;3;1	6;6;5;5;4;3;3;1	83316000	123660000	128840000	39S ribosomal protein L4, mitochondrial	MRPL4	;;;;;;	8	6	6	6	3	5	6	3	5	6	3	5	6	33.3	33.3	33.3	33.792	300	300;311;357;263;220;127;163;119	1	62	0	24.326	16	27	33.3	96466000	61499000	180660000	200030000	4	5	5	39
K7ES92;F5H4A3;F5H1R4;K7ES98;K7EM85;Q92619;Q92619-2	K7ES92;F5H4A3;F5H1R4;K7ES98;K7EM85;Q92619;Q92619-2	3;3;3;3;3;3;3	3;3;3;3;3;3;3	3;3;3;3;3;3;3	77333000	0	88123000	Minor histocompatibility protein HA-1;Minor histocompatibility antigen HA-1	HMHA1	;;;;;;	7	3	3	3	2	1	3	2	1	3	2	1	3	4.2	4.2	4.2	84.622	771	771;1004;1019;1140;1163;1136;1152	1	32	0	4.4692	3	1.3	4.2	97941000	24498000	11082000	128780000	2	0	1	18
M0QWZ7;Q9NP81;E7EX87;M0R2C6;Q9NP81-2;M0R259;B4DJM9;M0QX29;M0R2H5;M0R1C0	M0QWZ7;Q9NP81;E7EX87;M0R2C6;Q9NP81-2;M0R259	12;12;10;10;10;6;5;4;2;1	12;12;10;10;10;6;5;4;2;1	12;12;10;10;10;6;5;4;2;1	184190000	164520000	158930000	Serine--tRNA ligase, mitochondrial	SARS2	;;;;;	10	12	12	12	10	9	8	10	9	8	10	9	8	33.4	33.4	33.4	58.182	518	518;518;518;588;520;328;236;187;135;90	1	111	0	57.889	27.8	24.3	21.6	192460000	232970000	188610000	134660000	5	3	3	52
M0QX35;Q8N7H5;F8W9Q2;Q8N7H5-2;B4DGJ5	M0QX35;Q8N7H5;F8W9Q2;Q8N7H5-2;B4DGJ5	7;7;6;6;4	7;7;6;6;4	7;7;6;6;4	67142000	69736000	60877000	RNA polymerase II-associated factor 1 homolog	PAF1	;;;;	5	7	7	7	5	5	5	5	5	5	5	5	5	18.6	18.6	18.6	55.472	485	485;531;462;485;288	1	49	0	24.271	13.4	13.8	11.1	47558000	95061000	85767000	79165000	1	1	0	13
M0QY97;Q9UPT8	M0QY97;Q9UPT8	4;4	4;4	4;4	49636000	0	50758000	Zinc finger CCCH domain-containing protein 4	ZC3H4	;	2	4	4	4	2	1	4	2	1	4	2	1	4	10.5	10.5	10.5	95.425	910	910;1303	1	35	0	4.1779	6.2	3.1	10.5	58237000	45599000	17145000	67277000	1	0	0	12
M0QYA2;Q9NWS0;M0R2P8;M0R3A4;M0QXD5;M0R0J2;M0QYF4;Q9NWS0-3	M0QYA2;Q9NWS0;M0R2P8;M0R3A4;M0QXD5	4;4;2;2;2;1;1;1	4;4;2;2;2;1;1;1	3;3;2;2;1;0;0;0	52899000	62799000	80383000	PIH1 domain-containing protein 1	PIH1D1	;;;;	8	4	4	3	4	2	3	4	2	3	3	1	2	28.6	28.6	19.8	30.672	273	273;290;114;183;236;82;164;199	1	37	0	8.5752	28.6	18.3	23.4	83423000	77129000	39638000	89675000	1	0	2	12
M0QYH2;Q96T60;M0QX49;M0QYI1	M0QYH2;Q96T60	5;5;1;1	5;5;1;1	1;1;0;0	76316000	51630000	56260000	Bifunctional polynucleotide phosphatase/kinase;Polynucleotide 3-phosphatase;Polynucleotide 5-hydroxyl-kinase	PNKP	;	4	5	5	1	5	3	2	5	3	2	1	1	1	16.7	16.7	2.7	53.64	490	490;521;51;66	1	43	0	11.908	16.7	9	5.5	43867000	101650000	51896000	36471000	2	3	1	31
M0QYZ2;M0R0N4;P53680;X6R390;P53680-2;M0QZ21;M0R1S0	M0QYZ2;M0R0N4;P53680;X6R390;P53680-2;M0QZ21	7;6;6;5;5;4;2	7;6;6;5;5;4;2	7;6;6;5;5;4;2	210290000	176160000	197360000	AP-2 complex subunit sigma	AP2S1	;;;;;	7	7	7	7	6	6	5	6	6	5	6	6	5	44.3	44.3	44.3	18.929	158	158;144;142;156;104;122;92	1	65	0	9.2007	39.9	39.9	34.8	210540000	190580000	187540000	147380000	5	2	1	36
M0QZ22;Q5PRF9;M0R0X3;M0QY61;M0QXV2	M0QZ22;Q5PRF9;M0R0X3	5;5;3;2;1	5;5;3;2;1	5;5;3;2;1	36818000	35416000	0	Protein Smaug homolog 2	SAMD4B	;;	5	5	5	5	4	3	2	4	3	2	4	3	2	12.6	12.6	12.6	75.292	692	692;694;325;219;75	1	44	0	4.8257	8.5	5.1	3.5	31034000	38588000	28027000	25507000	2	1	0	9
M0QZR4;Q92888;Q92888-3;Q92888-2;Q6NX52;M0QYC1;M0QYS3;M0QZH8;M0R2C7;M0R3H5	M0QZR4;Q92888;Q92888-3;Q92888-2;Q6NX52;M0QYC1	16;16;16;15;12;9;5;4;3;1	16;16;16;15;12;9;5;4;3;1	16;16;16;15;12;9;5;4;3;1	299610000	271520000	276650000	Rho guanine nucleotide exchange factor 1	ARHGEF1	;;;;;	10	16	16	16	13	11	11	13	11	11	13	11	11	19.6	19.6	19.6	108.32	968	968;912;927;879;948;702;307;275;291;88	1	175	0	83.67	16.6	12.9	14.4	216000000	334260000	284620000	310060000	7	6	7	76
M0QZW1;Q9BZL6;M0R2R2;M0QXC6	M0QZW1;Q9BZL6;M0R2R2	5;5;3;1	5;5;3;1	4;4;2;1	0	0	29482000	Serine/threonine-protein kinase;Serine/threonine-protein kinase D2	PRKD2	;;	4	5	5	4	1	1	3	1	1	3	1	0	2	9.2	9.2	7.7	97.77	888	888;878;721;73	1	25	0	10.878	1.7	1.6	5.2	11121000	8363500	10782000	31543000	1	1	2	10
M0R0F0;P46782;M0R0R2;M0QZN2	M0R0F0;P46782;M0R0R2;M0QZN2	12;12;11;7	12;12;11;7	12;12;11;7	2172000000	2432600000	2265000000	40S ribosomal protein S5;40S ribosomal protein S5, N-terminally processed	RPS5	;;;	4	12	12	12	10	10	11	10	10	11	10	10	11	59	59	59	22.391	200	200;204;225;134	1	209	0	84.458	50	55	58.5	2672100000	2270400000	2722200000	2150600000	14	14	12	143
M0R0P9;Q0VAN0;P31751;J3QKW1;J3QL45;M0QZW8;M0R283;J3QLS6;C9JHS6;J3KTP4;G3V4I6;C9J258;J3QQM6;J3KSY8;G3V3K5;C9JC83;C9JIJ1;M0R275;J3KRI8;F6YBB4;A8MX96;E7EVP8;F8VS91;M0QZK3;Q9Y243-2;Q9Y243	M0R0P9;Q0VAN0;P31751;J3QKW1;J3QL45	6;6;6;4;3;2;2;2;2;1;1;1;1;1;1;1;1;1;1;1;1;1;1;1;1;1	6;6;6;4;3;2;2;2;2;1;1;1;1;1;1;1;1;1;1;1;1;1;1;1;1;1	4;4;4;3;2;1;2;1;1;0;0;0;0;0;0;0;0;1;0;0;0;0;0;0;0;0	52686000	67094000	63104000	RAC-beta serine/threonine-protein kinase	AKT2	;;;;	26	6	6	4	4	4	3	4	4	3	3	4	3	14	14	9.3	51.571	450	450;438;481;292;106;56;117;157;184;51;91;95;96;99;105;107;119;129;130;132;133;134;139;151;465;479	1	50	0	10.32	8.9	9.3	6.4	38050000	39883000	59121000	51892000	1	2	3	17
M0R165;Q9UBC2-3;Q9UBC2;Q9UBC2-2;Q9UBC2-4;M0R2S2;M0R1V5;M0QX30;M0R3I1;K7EJR2;M0R330	M0R165;Q9UBC2-3;Q9UBC2;Q9UBC2-2;Q9UBC2-4;M0R2S2	11;11;11;11;10;7;3;2;2;1;1	11;11;11;11;10;7;3;2;2;1;1	11;11;11;11;10;7;3;2;2;1;1	178920000	164550000	167880000	Epidermal growth factor receptor substrate 15-like 1	EPS15L1	;;;;;	11	11	11	11	10	7	7	10	7	7	10	7	7	21.7	21.7	21.7	83.474	756	756;754;864;910;601;447;110;90;213;79;83	1	96	0	22.686	18.7	11.5	11.5	134790000	224550000	146730000	147130000	4	2	3	39
M0R208;Q16740;M0QYV5	M0R208;Q16740	7;7;3	7;7;3	7;7;3	159170000	166250000	160670000	ATP-dependent Clp protease proteolytic subunit;ATP-dependent Clp protease proteolytic subunit, mitochondrial	CLPP	;	3	7	7	7	4	6	6	4	6	6	4	6	6	47.9	47.9	47.9	20.568	190	190;277;160	1	69	0	41.864	22.1	40	39.5	176640000	132200000	215830000	197220000	2	5	4	34
M0R2A0;Q5UCC4-2;Q5UCC4	M0R2A0;Q5UCC4-2;Q5UCC4	3;3;3	3;3;3	3;3;3	107540000	84750000	91406000	ER membrane protein complex subunit 10	EMC10	;;	3	3	3	3	3	2	2	3	2	2	3	2	2	13.2	13.2	13.2	38.975	371	371;254;262	1	31	0	53.537	13.2	11.3	11.3	111790000	142640000	65677000	69165000	2	0	3	27
M0R2B7;P28340;M0QZR8;M0QXE6;M0QZB4;M0QXQ2;M0R3H8	M0R2B7;P28340;M0QZR8	10;10;9;3;2;1;1	10;10;9;3;2;1;1	10;10;9;3;2;1;1	105120000	69694000	110310000	DNA polymerase;DNA polymerase delta catalytic subunit	POLD1	;;	7	10	10	10	7	7	5	7	7	5	7	7	5	11.9	11.9	11.9	126.39	1133	1133;1107;1009;289;188;291;397	1	78	0	30.615	8.9	8.2	4.8	121790000	111490000	79400000	91905000	3	4	2	33
M0R3D4;Q9UI14;M0QXH1;M0R1H9	M0R3D4;Q9UI14;M0QXH1;M0R1H9	2;2;1;1	2;2;1;1	2;2;1;1	54414000	0	0	Prenylated Rab acceptor protein 1	RABAC1	;;;	4	2	2	2	2	1	1	2	1	1	2	1	1	19.2	19.2	19.2	17.056	151	151;185;109;149	1	21	0	20.243	19.2	9.3	9.3	20135000	57459000	23611000	0	1	1	1	14
O00116;B8ZZ81	O00116	23;5	23;5	23;5	907940000	912270000	993160000	Alkyldihydroxyacetonephosphate synthase, peroxisomal	AGPS		2	23	23	23	23	19	18	23	19	18	23	19	18	49.7	49.7	49.7	72.911	658	658;189	1	301	0	171.3	49.7	37.5	38.9	1020800000	1121000000	909830000	863560000	16	11	9	158
O00139-2;O00139-1;O00139-5;O00139;O00139-4;D6R9M0;H0Y8H2;Q8N4N8	O00139-2;O00139-1;O00139-5;O00139;O00139-4	10;10;10;10;10;2;1;1	10;10;10;10;10;2;1;1	10;10;10;10;10;2;1;1	82065000	79817000	81872000	Kinesin-like protein KIF2A	KIF2A	;;;;	8	10	10	10	5	6	5	5	6	5	5	6	5	16.7	16.7	16.7	75.042	660	660;679;686;706;744;284;130;673	1	99	0	17.921	9.5	10.8	7.7	118240000	63262000	76046000	61971000	3	3	3	34
O00148;O00148-2;B1Q2N1;K7EQN7;K7EPJ3	O00148;O00148-2;B1Q2N1	21;14;11;10;7	9;5;3;3;2	9;5;3;3;2	878730000	843990000	896080000	ATP-dependent RNA helicase DDX39A	DDX39A	;;	5	21	9	9	20	20	21	8	8	9	8	8	9	57.6	27.2	27.2	49.129	427	427;322;267;255;189	1	157	0	119.45	52.5	52.5	57.6	910780000	932570000	892550000	915530000	10	8	8	112
O00151	O00151	13	13	13	559790000	487310000	507950000	PDZ and LIM domain protein 1	PDLIM1		1	13	13	13	12	9	10	12	9	10	12	9	10	63.8	63.8	63.8	36.071	329	329	1	159	0	83.219	59	46.8	50.5	476570000	619050000	325970000	569890000	7	7	10	95
O00154-4;O00154-6;O00154-7;O00154;O00154-5;B4DUX0;K7EKP8;O00154-2;O00154-3;F5GWE2;Q6ZUV0	O00154-4;O00154-6;O00154-7;O00154;O00154-5;B4DUX0;K7EKP8;O00154-2;O00154-3	14;13;13;13;12;11;10;9;9;5;1	14;13;13;13;12;11;10;9;9;5;1	14;13;13;13;12;11;10;9;9;5;1	941490000	855640000	900280000	Cytosolic acyl coenzyme A thioester hydrolase	ACOT7	;;;;;;;;	11	14	14	14	12	12	12	12	12	12	12	12	12	56.5	56.5	56.5	37.419	338	338;329;370;380;350;265;279;246;283;223;252	1	208	0	122.78	49.7	46.4	50.6	852840000	1176000000	848540000	827080000	12	7	8	109
O00165-5;O00165-3;O00165;O00165-2;E9PIQ7;Q5VYD6;O00165-4	O00165-5;O00165-3;O00165;O00165-2;E9PIQ7	4;4;4;3;2;1;1	4;4;4;3;2;1;1	4;4;4;3;2;1;1	0	52046000	0	HCLS1-associated protein X-1	HAX1	;;;;	7	4	4	4	2	3	2	2	3	2	2	3	2	28.6	28.6	28.6	26.099	231	231;253;279;287;151;255;124	1	33	0	4.3514	10	14.7	10	56553000	28610000	73881000	82478000	0	0	0	4
O00170;E9PMH2;V9GYQ3	O00170;E9PMH2	14;10;4	14;10;4	14;10;4	389260000	354560000	351220000	AH receptor-interacting protein	AIP	;	3	14	14	14	13	11	12	13	11	12	13	11	12	58.5	58.5	58.5	37.636	330	330;232;188	1	168	0	58.799	54.8	46.7	47.6	358280000	475280000	407370000	424190000	9	6	6	87
O00178;F5H257;F5H716;B0QY59	O00178	7;1;1;1	7;1;1;1	7;1;1;1	77516000	87557000	66262000	GTP-binding protein 1	GTPBP1		4	7	7	7	6	4	3	6	4	3	6	4	3	17	17	17	72.453	669	669;86;152;349	1	54	0	25.098	14.9	9.9	6.6	57753000	104270000	65102000	53200000	4	2	1	24
O00186	O00186	11	11	11	253890000	260850000	236930000	Syntaxin-binding protein 3	STXBP3		1	11	11	11	10	9	10	10	9	10	10	9	10	26.7	26.7	26.7	67.764	592	592	1	148	0	25.501	20.9	18.1	20.9	287300000	286580000	290000000	264780000	5	7	7	63
O00194;K7ES41;H3BU81;H3BUD9;H3BS49;H3BVH7;H3BN55;P51159-2;P51159	O00194	5;2;1;1;1;1;1;1;1	5;2;1;1;1;1;1;1;1	5;2;1;1;1;1;1;1;1	160770000	121060000	121470000	Ras-related protein Rab-27B	RAB27B		9	5	5	5	4	3	4	4	3	4	4	3	4	27.1	27.1	27.1	24.608	218	218;87;71;95;136;146;185;213;221	1	60	0	11.937	23.9	17.4	22	97230000	184550000	93729000	114180000	3	0	2	17
O00203-3;O00203;Q13367;Q13367-4;Q13367-3;F5GYB0;H0YBD0;F5GWU4	O00203-3;O00203	23;23;4;4;3;1;1;1	23;23;4;4;3;1;1;1	23;23;4;4;3;1;1;1	503100000	472240000	478950000	AP-3 complex subunit beta-1	AP3B1	;	8	23	23	23	17	17	17	17	17	17	17	17	17	26.5	26.5	26.5	116.19	1045	1045;1094;1082;1101;1050;141;154;193	1	216	0	83.119	19.4	20.2	19.5	414240000	695470000	398520000	395770000	10	7	8	88
O00231;O00231-2;J3QRY4;J3QS13;J3KSW3	O00231;O00231-2	22;21;7;5;1	22;21;7;5;1	22;21;7;5;1	2068300000	2011200000	2169800000	26S proteasome non-ATPase regulatory subunit 11	PSMD11	;	5	22	22	22	20	20	18	20	20	18	20	20	18	62.3	62.3	62.3	47.463	422	422;423;187;90;45	1	346	0	172.13	59.2	57.6	55.9	1856200000	2370500000	2266700000	2648800000	26	15	14	229
O00232;O00232-2;J3KTJ5;J3KSK1	O00232;O00232-2	23;21;1;1	23;21;1;1	23;21;1;1	1198200000	1212900000	1207700000	26S proteasome non-ATPase regulatory subunit 12	PSMD12	;	4	23	23	23	23	20	20	23	20	20	23	20	20	59.4	59.4	59.4	52.904	456	456;436;38;42	1	292	0	161.34	59.4	54.6	52.9	1255500000	1513700000	1151700000	1068900000	19	12	15	174
O00233;J3KN29;F5H5V4;F5GX23;F8W7V8;O00233-2;F5H7X1;O00233-3;F5H169	O00233;J3KN29;F5H5V4;F5GX23;F8W7V8;O00233-2;F5H7X1	7;6;5;5;5;5;4;3;2	7;6;5;5;5;5;4;3;2	7;6;5;5;5;5;4;3;2	258130000	272190000	287980000	26S proteasome non-ATPase regulatory subunit 9	PSMD9	;;;;;;	9	7	7	7	5	7	6	5	7	6	5	7	6	34.5	34.5	34.5	24.682	223	223;222;153;179;207;209;85;118;128	1	98	0	26.593	26.9	34.5	30.9	343360000	245910000	301210000	312460000	3	4	5	43
O00264;O00264-2	O00264;O00264-2	7;4	6;4	6;4	727900000	631430000	579160000	Membrane-associated progesterone receptor component 1	PGRMC1	;	2	7	6	6	6	6	6	5	5	5	5	5	5	41.5	36.9	36.9	21.671	195	195;143	1	88	0	27.306	31.3	31.3	31.3	552030000	811520000	669250000	648310000	8	3	6	54
O00267-2;O00267;M0QYL9	O00267-2;O00267	24;24;1	24;24;1	24;24;1	599040000	654310000	584310000	Transcription elongation factor SPT5	SUPT5H	;	3	24	24	24	19	19	19	19	19	19	19	19	19	31.4	31.4	31.4	120.5	1083	1083;1087;164	1	277	0	127.82	27.1	25	26.1	662470000	582320000	659010000	641420000	14	12	12	150
O00273;O00273-2;K7ERT1	O00273;O00273-2	6;5;2	6;5;2	6;5;2	77705000	76401000	68937000	DNA fragmentation factor subunit alpha	DFFA	;	3	6	6	6	6	5	5	6	5	5	6	5	5	22.1	22.1	22.1	36.521	331	331;268;159	1	63	0	29.002	22.1	18.4	18.4	49084000	84331000	82527000	76320000	2	3	2	28
O00299	O00299	14	14	14	6070000000	5709100000	6067300000	Chloride intracellular channel protein 1	CLIC1		1	14	14	14	14	13	14	14	13	14	14	13	14	77.6	77.6	77.6	26.922	241	241	1	290	0	200.44	77.6	73.9	77.6	6537300000	6187400000	6313000000	6530300000	26	25	21	286
O00330-3;O00330;H0YD97;O00330-2;E9PLU0;E9PRI6	O00330-3;O00330;H0YD97;O00330-2	4;4;2;2;1;1	4;4;2;2;1;1	4;4;2;2;1;1	54612000	54244000	57049000	Pyruvate dehydrogenase protein X component, mitochondrial	PDHX	;;;	6	4	4	4	4	4	4	4	4	4	4	4	4	12.8	12.8	12.8	51.459	486	486;501;189;274;151;182	1	45	0	7.9362	12.8	12.8	12.8	52593000	60986000	59416000	63985000	4	4	4	27
O00399;E5RK00;E5RIK5;E5RGW9;E5RFU3	O00399;E5RK00	4;2;1;1;1	4;2;1;1;1	4;2;1;1;1	0	76300000	0	Dynactin subunit 6	DCTN6	;	5	4	4	4	2	3	3	2	3	3	2	3	3	26.8	26.8	26.8	20.747	190	190;170;37;46;73	1	27	0	7.8355	14.2	21.6	22.1	25956000	23169000	90287000	46841000	1	2	1	13
O00401	O00401	3	3	3	42777000	43020000	49135000	Neural Wiskott-Aldrich syndrome protein	WASL		1	3	3	3	2	2	2	2	2	2	2	2	2	11.5	11.5	11.5	54.826	505	505	1	27	0	6.9268	9.9	9.9	9.9	41611000	44935000	39663000	48968000	2	1	0	11
O00410;O00410-3;H0Y8C6;O00410-2;B4E0R6;E7ETV3;C9JMV5;E7EQT5;E7EV12;H0Y3V4;E7EWK4;E7EX05;C9JZD8;C9JQT6;E7ESA1;E7ESZ1;E7ETV8;C9JZ53;C9J875;C9JXE0	O00410;O00410-3;H0Y8C6;O00410-2;B4E0R6	48;48;46;43;40;10;9;8;8;8;6;6;5;5;5;5;5;4;3;2	48;48;46;43;40;10;9;8;8;8;6;6;5;5;5;5;5;4;3;2	46;46;44;41;38;10;9;8;8;8;6;6;5;5;5;5;5;4;3;2	4500600000	4303200000	4439600000	Importin-5	IPO5	;;;;	20	48	48	46	43	44	39	43	44	39	42	42	37	61.8	61.8	60.1	123.63	1097	1097;1115;1099;1037;972;170;165;126;142;182;117;119;74;88;98;106;128;77;75;64	1	800	0	323.31	54.9	53.9	45.7	4060400000	5878800000	4419000000	4758700000	44	42	38	520
O00411;K7EMH3	O00411	3;1	3;1	3;1	31711000	0	0	DNA-directed RNA polymerase, mitochondrial	POLRMT		2	3	3	3	2	1	1	2	1	1	2	1	1	3.5	3.5	3.5	138.62	1230	1230;349	1	17	0.0012604	2.7481	2.8	0.9	2	17252000	35554000	6785500	17247000	1	0	0	9
O00425;O00425-2;F8WD15	O00425	20;8;4	20;8;4	18;7;4	750490000	722340000	878840000	Insulin-like growth factor 2 mRNA-binding protein 3	IGF2BP3		3	20	20	18	16	15	16	16	15	16	14	13	14	42.7	42.7	38.7	63.704	579	579;198;81	1	251	0	151.29	34.5	32.6	35.6	688690000	961670000	757270000	788290000	13	7	12	133
O00429-4;O00429-2;G8JLD5;O00429-5;O00429-3;O00429;O00429-8;O00429-6;O00429-7;F8VZ52;F8W1W3;B4DDQ3;B4DPZ9;F8VUJ9;F8VR28;F8VYL3;H0YHY4;H0YI79	O00429-4;O00429-2;G8JLD5;O00429-5;O00429-3;O00429;O00429-8;O00429-6;O00429-7	34;34;33;33;33;33;33;32;19;14;9;9;8;7;4;4;3;1	34;34;33;33;33;33;33;32;19;14;9;9;8;7;4;4;3;1	34;34;33;33;33;33;33;32;19;14;9;9;8;7;4;4;3;1	1116100000	1138900000	1109800000	Dynamin-1-like protein	DNM1L	;;;;;;;;	18	34	34	34	27	28	28	27	28	28	27	28	28	61.7	61.7	61.7	78.099	699	699;725;712;710;710;736;738;749;533;261;168;180;156;172;97;117;54;48	1	424	0	212.95	51.8	49.6	49.5	1069100000	1203200000	1160900000	1321500000	17	13	8	172
O00442;O00442-2;A6NIC1	O00442;O00442-2	10;9;1	10;9;1	10;9;1	202130000	190780000	196950000	RNA 3-terminal phosphate cyclase	RTCA	;	3	10	10	10	8	9	5	8	9	5	8	9	5	34.2	34.2	34.2	39.336	366	366;379;49	1	99	0	31.612	29.2	32	17.2	268720000	264890000	255520000	187800000	4	5	1	37
O00461;F8W785	O00461;F8W785	7;6	7;6	7;6	130070000	138910000	169220000	Golgi integral membrane protein 4	GOLIM4	;	2	7	7	7	7	6	4	7	6	4	7	6	4	11.9	11.9	11.9	81.879	696	696;668	1	83	0	22.203	11.9	10.8	6.5	132520000	194070000	120280000	128090000	4	2	3	33
O00468-6;O00468-3;O00468-7;O00468-5;O00468-4;O00468;O00468-2;H0Y5U1	O00468-6;O00468-3;O00468-7;O00468-5;O00468-4;O00468;O00468-2	13;12;12;11;11;11;10;1	13;12;12;11;11;11;10;1	13;12;12;11;11;11;10;1	109290000	101490000	86568000	Agrin;Agrin N-terminal 110 kDa subunit;Agrin C-terminal 110 kDa subunit;Agrin C-terminal 90 kDa fragment;Agrin C-terminal 22 kDa fragment	AGRN	;;;;;;	8	13	13	13	9	7	5	9	7	5	9	7	5	9.1	9.1	9.1	214.84	2045	2045;2049;2063;2057;2059;2067;1963;271	1	82	0	23.514	6.1	5.6	3.5	102930000	163830000	114300000	59130000	3	3	3	33
O00469;O00469-2;E7ETU9;B3KWS3;C9JXZ0;F8WEW3	O00469;O00469-2;E7ETU9;B3KWS3	13;13;12;7;4;1	13;13;12;7;4;1	13;13;12;7;4;1	325980000	354080000	379570000	Procollagen-lysine,2-oxoglutarate 5-dioxygenase 2	PLOD2	;;;	6	13	13	13	12	11	11	12	11	11	12	11	11	21.3	21.3	21.3	84.685	737	737;758;703;418;229;98	1	181	0	44.012	20.1	18	18	347910000	365960000	365060000	327280000	10	6	5	76
O00471	O00471	9	9	1	88441000	69080000	95137000	Exocyst complex component 5	EXOC5		1	9	9	1	6	6	7	6	6	7	0	0	1	18.1	18.1	2.1	81.852	708	708	1	69	0	18.567	12.3	9.2	11.3	105570000	85199000	83329000	110880000	3	2	4	30
O00487	O00487	11	11	11	628730000	599090000	686470000	26S proteasome non-ATPase regulatory subunit 14	PSMD14		1	11	11	11	10	9	9	10	9	9	10	9	9	44.8	44.8	44.8	34.577	310	310	1	159	0	63.232	40.3	42.6	42.6	595100000	844700000	658140000	730610000	13	8	10	96
O00499-9;O00499-10;O00499-7;O00499-8;O00499-4;O00499-6;O00499-11;O00499-3;O00499-2;O00499-5;O00499;S4R418;F5H0W4;F5H533;Q9UBW5-2;Q9UBW5;P49418-2;P49418	O00499-9;O00499-10;O00499-7;O00499-8;O00499-4;O00499-6;O00499-11;O00499-3;O00499-2;O00499-5;O00499	12;12;12;12;12;12;12;12;12;12;12;1;1;1;1;1;1;1	12;12;12;12;12;12;12;12;12;12;12;1;1;1;1;1;1;1	12;12;12;12;12;12;12;12;12;12;12;1;1;1;1;1;1;1	261560000	310900000	298260000	Myc box-dependent-interacting protein 1	BIN1	;;;;;;;;;;	18	12	12	12	9	10	9	9	10	9	9	10	9	45.5	45.5	45.5	45.563	409	409;424;439;454;475;482;497;506;518;550;593;531;539;653;533;565;653;695	1	131	0	50.903	34.2	35.7	34.5	315450000	285980000	359630000	269780000	7	6	6	70
O00505;H0Y4S9	O00505	7;1	5;1	5;1	136800000	120060000	142810000	Importin subunit alpha-4	KPNA3		2	7	5	5	4	5	6	2	3	4	2	3	4	21.9	17.5	17.5	57.81	521	521;91	1	54	0	7.6595	8.8	10.7	17.1	119580000	108390000	127420000	164130000	1	2	2	22
O00560;O00560-3;B4DHN5;E9PBU7	O00560;O00560-3;B4DHN5;E9PBU7	10;9;7;7	10;9;7;7	1;1;0;0	762960000	646850000	705480000	Syntenin-1	SDCBP	;;;	4	10	10	1	9	8	8	9	8	8	1	1	1	57.7	57.7	6	32.444	298	298;292;239;244	1	174	0	163.91	54.4	43	52	663580000	835990000	771090000	681810000	14	11	10	123
O00571;O00571-2;B4E3C4;B4DLA0	O00571;O00571-2	34;33;7;5	34;33;7;5	10;9;3;4	3201400000	3189200000	3210400000	ATP-dependent RNA helicase DDX3X	DDX3X	;	4	34	34	10	34	32	32	34	32	32	10	9	9	60.4	60.4	19.3	73.243	662	662;646;308;139	1	593	0	308.89	60.4	57.6	57.1	2826700000	3796700000	3577200000	3268200000	25	31	20	309
O00622	O00622	6	6	6	122820000	121520000	119000000	Protein CYR61	CYR61		1	6	6	6	6	5	4	6	5	4	6	5	4	19.2	19.2	19.2	42.026	381	381	1	68	0	19.77	19.2	16.8	13.9	123170000	148200000	122030000	112730000	2	2	2	18
O00625	O00625	10	10	10	709110000	660010000	843950000	Pirin	PIR		1	10	10	10	9	8	7	9	8	7	9	8	7	54.8	54.8	54.8	32.113	290	290	1	142	0	36.205	54.8	42.1	33.8	717350000	638810000	1015400000	965210000	9	7	4	70
O00629;H7C4F6	O00629	9;3	9;3	7;3	555270000	654650000	623460000	Importin subunit alpha-3	KPNA4		2	9	9	7	7	5	8	7	5	8	5	3	6	31.7	31.7	27.3	57.886	521	521;170	1	105	0	41.044	19.8	18.8	28.4	379710000	392490000	351150000	1887600000	6	4	5	66
O00743;O00743-2;O00743-3;B7Z3E2;Q5T1S7	O00743;O00743-2;O00743-3;B7Z3E2	12;11;11;7;2	12;11;11;7;2	12;11;11;7;2	337770000	357210000	344930000	Serine/threonine-protein phosphatase 6 catalytic subunit;Serine/threonine-protein phosphatase 6 catalytic subunit, N-terminally processed	PPP6C	;;;	5	12	12	12	10	11	10	10	11	10	10	11	10	48.5	48.5	48.5	35.144	305	305;283;342;158;125	1	141	0	84.145	43.6	44.3	43.6	295120000	401530000	403950000	304220000	10	8	6	91
O00764;F2Z2Y4;O00764-3;O00764-2;A8MV33	O00764;F2Z2Y4;O00764-3;O00764-2	16;14;13;12;1	16;14;13;12;1	16;14;13;12;1	1005700000	898110000	979260000	Pyridoxal kinase	PDXK	;;;	5	16	16	16	10	14	12	10	14	12	10	14	12	63.1	63.1	63.1	35.102	312	312;272;239;284;87	1	178	0	140.38	42.6	58.3	48.4	1073200000	1016600000	1089300000	941330000	8	10	10	120
O00767	O00767	5	5	5	201310000	260130000	236650000	Acyl-CoA desaturase	SCD		1	5	5	5	4	3	3	4	3	3	4	3	3	17.8	17.8	17.8	41.522	359	359	1	56	0	12.102	17.8	14.2	14.2	210130000	143330000	181850000	232390000	4	2	2	32
O14548;E5RJZ1;H0YBD2	O14548;E5RJZ1;H0YBD2	3;2;2	3;2;2	3;2;2	68608000	79093000	0	Cytochrome c oxidase subunit 7A-related protein, mitochondrial	COX7A2L	;;	3	3	3	3	3	3	1	3	3	1	3	3	1	48.2	48.2	48.2	12.615	114	114;79;95	1	32	0	7.4104	48.2	48.2	11.4	57852000	80770000	87608000	40827000	2	2	1	21
O14556	O14556	2	1	1	0	324420000	0	Glyceraldehyde-3-phosphate dehydrogenase, testis-specific	GAPDHS		1	2	1	1	1	2	1	0	1	0	0	1	0	4.4	2.7	2.7	44.501	408	408	1	2	1	-2	1.7	4.4	1.7	0	0	343490000	0	0	0	0	1
O14561;I3L505;H3BNK3	O14561;I3L505;H3BNK3	4;2;2	4;2;2	4;2;2	307910000	354980000	366970000	Acyl carrier protein, mitochondrial;Acyl carrier protein	NDUFAB1	;;	3	4	4	4	4	4	3	4	4	3	4	4	3	21.2	21.2	21.2	17.417	156	156;70;111	1	67	0	14.914	21.2	21.2	15.4	398590000	390140000	536640000	329120000	2	4	4	33
O14579;M0QXB4;O14579-3;O14579-2;M0R061	O14579;M0QXB4;O14579-3;O14579-2;M0R061	10;9;8;8;5	10;9;8;8;5	10;9;8;8;5	849980000	715890000	889530000	Coatomer subunit epsilon	COPE	;;;;	5	10	10	10	9	9	10	9	9	10	9	9	10	44.5	44.5	44.5	34.482	308	308;331;256;257;146	1	190	0	160.78	39.9	39.9	44.5	679680000	931980000	762710000	803640000	12	13	13	147
O14613	O14613	3	3	3	39921000	0	0	Cdc42 effector protein 2	CDC42EP2		1	3	3	3	3	0	0	3	0	0	3	0	0	29.5	29.5	29.5	22.483	210	210	1	14	0	26.499	29.5	0	0	0	41414000	0	0	2	0	0	9
O14617-4;O14617;O14617-5;G5E988;O14617-2;E7EMM2;O14617-3;K7ELX8;K7ERW8	O14617-4;O14617;O14617-5;G5E988;O14617-2;E7EMM2;O14617-3	27;27;27;21;21;19;19;3;2	27;27;27;21;21;19;19;3;2	27;27;27;21;21;19;19;3;2	423290000	406120000	443180000	AP-3 complex subunit delta-1	AP3D1	;;;;;;	9	27	27	27	20	21	18	20	21	18	20	21	18	37.1	37.1	37.1	114.71	1021	1021;1153;1215;1112;1112;984;984;193;155	1	251	0	81.593	26.7	28	24.6	406410000	491980000	422010000	477250000	10	10	11	123
O14646-2;O14646;H3BTW3	O14646-2;O14646	5;5;1	5;5;1	2;2;0	29316000	0	27854000	Chromodomain-helicase-DNA-binding protein 1	CHD1	;	3	5	5	2	4	0	3	4	0	3	2	0	0	3.2	3.2	1.3	196.59	1709	1709;1710;1098	1	37	0	6.0905	2.6	0	1.9	33751000	29952000	0	21190000	4	0	2	22
O14656;O14656-2	O14656;O14656-2	6;3	6;3	6;3	109840000	81581000	88972000	Torsin-1A	TOR1A	;	2	6	6	6	4	3	4	4	3	4	4	3	4	18.7	18.7	18.7	37.808	332	332;197	1	48	0	9.1733	11.7	11.7	15.1	74176000	109740000	73498000	122760000	3	1	1	20
O14657;H0Y7C8	O14657;H0Y7C8	4;2	4;2	4;2	225410000	166350000	200680000	Torsin-1B	TOR1B	;	2	4	4	4	3	4	4	3	4	4	3	4	4	14.3	14.3	14.3	37.978	336	336;141	1	50	0	30.05	10.1	14.3	14.3	63552000	255590000	134190000	169440000	3	1	1	17
O14672;H0YK87;C9J9B4;B4DU28	O14672	6;2;2;1	6;2;2;1	6;2;2;1	76066000	43495000	0	Disintegrin and metalloproteinase domain-containing protein 10	ADAM10		4	6	6	6	4	3	3	4	3	3	4	3	3	12.8	12.8	12.8	84.141	748	748;115;125;447	1	43	0	15.266	9	7	7.6	70565000	47260000	37913000	34049000	3	2	1	19
O14684	O14684	6	6	6	1868100000	1996100000	1886600000	Prostaglandin E synthase	PTGES		1	6	6	6	4	6	6	4	6	6	4	6	6	31.6	31.6	31.6	17.102	152	152	1	89	0	25.453	23	31.6	31.6	1867500000	1920400000	2421100000	1793000000	6	6	6	73
O14732-2;O14732;K7EII9;K7EIH6;K7ELF8	O14732-2;O14732	5;5;1;1;1	5;5;1;1;1	5;5;1;1;1	39671000	0	0	Inositol monophosphatase 2	IMPA2	;	5	5	5	5	2	1	1	2	1	1	2	1	1	28.7	28.7	28.7	28.511	261	261;288;99;126;163	1	19	0	11.239	9.2	3.4	3.4	34080000	43192000	36273000	30356000	1	0	0	5
O14737;B4DE64;K7EQA1;K7ESJ4;Q3HM38;X6R2P6	O14737;B4DE64;K7EQA1	9;7;6;4;3;3	9;7;6;4;3;3	9;7;6;4;3;3	971570000	1001300000	1060200000	Programmed cell death protein 5	PDCD5	;;	6	9	9	9	9	9	9	9	9	9	9	9	9	69.6	69.6	69.6	14.285	125	125;129;87;65;40;55	1	133	0	42.604	69.6	69.6	69.6	911060000	1122100000	1130500000	1155400000	8	7	6	77
O14744-5;O14744;O14744-3;O14744-2;B4DV00;O14744-4;G3V580;H0YJX6;G3V2X6;C9JSX3;G3V5L5;G3V2L6;H0YJ77;H0YJD3;H7BZ44;G3V507;G3V2F5;G3V5T6	O14744-5;O14744;O14744-3;O14744-2;B4DV00;O14744-4	17;17;15;15;13;10;8;7;6;5;4;4;3;3;3;2;2;1	17;17;15;15;13;10;8;7;6;5;4;4;3;3;3;2;2;1	17;17;15;15;13;10;8;7;6;5;4;4;3;3;3;2;2;1	684140000	765970000	831920000	Protein arginine N-methyltransferase 5;Protein arginine N-methyltransferase 5, N-terminally processed;Protein arginine N-methyltransferase 5	PRMT5	;;;;;	18	17	17	17	13	13	15	13	13	15	13	13	15	43.3	43.3	43.3	67.673	593	593;637;576;620;531;466;180;279;185;186;169;183;138;177;179;42;86;104	1	214	0	91.35	31.4	30.5	37.1	816870000	696630000	819480000	924990000	9	9	15	134
O14745;J3QRP6;B3KY21;J3QRA3	O14745;J3QRP6;B3KY21	14;9;8;1	14;9;8;1	14;9;8;1	759420000	787530000	800540000	Na(+)/H(+) exchange regulatory cofactor NHE-RF1	SLC9A3R1	;;	4	14	14	14	8	10	8	8	10	8	8	10	8	54.5	54.5	54.5	38.868	358	358;215;202;35	1	168	0	101.24	30.2	40.8	29.9	651280000	825470000	655970000	681690000	9	6	8	99
O14773;O14773-2;E7EV34	O14773;O14773-2	8;7;1	8;7;1	8;7;1	201710000	106000000	154480000	Tripeptidyl-peptidase 1	TPP1	;	3	8	8	8	5	4	4	5	4	4	5	4	4	19.5	19.5	19.5	61.247	563	563;320;177	1	74	0	14.436	11.5	7.6	10.8	110580000	191820000	119750000	168550000	2	3	3	30
O14776-2;O14776;G3V220	O14776-2;O14776;G3V220	15;15;12	15;15;12	15;15;12	292950000	300250000	325930000	Transcription elongation regulator 1	TCERG1	;;	3	15	15	15	10	13	13	10	13	13	10	13	13	16.4	16.4	16.4	121.69	1077	1077;1098;1032	1	146	0	29.133	10.7	13.5	14.9	256680000	261870000	371280000	394250000	5	5	7	75
O14818;O14818-2;H0Y586;O14818-4;Q8TAA3-2;Q8TAA3-5;Q8TAA3;F5GY34	O14818;O14818-2;H0Y586;O14818-4	16;9;8;8;5;5;5;2	16;9;8;8;5;5;5;2	16;9;8;8;5;5;5;2	3448700000	2974700000	3024900000	Proteasome subunit alpha type-7	PSMA7	;;;	8	16	16	16	16	14	15	16	14	15	16	14	15	67.3	67.3	67.3	27.887	248	248;178;187;149;212;250;256;63	1	285	0	214.42	67.3	66.9	67.3	2872600000	3542900000	3316400000	3114300000	21	14	12	191
O14828;O14828-2	O14828	7;3	7;3	7;3	530440000	536260000	520350000	Secretory carrier-associated membrane protein 3	SCAMP3		2	7	7	7	5	7	6	5	7	6	5	7	6	32.6	32.6	32.6	38.287	347	347;321	1	113	0	109.68	21	32.6	32.6	496390000	615210000	449570000	551470000	3	5	4	51
O14879	O14879	25	25	25	6537300000	6092200000	6417600000	Interferon-induced protein with tetratricopeptide repeats 3	IFIT3		1	25	25	25	22	21	22	22	21	22	22	21	22	69	69	69	55.984	490	490	1	434	0	323.31	62.9	61.2	62.9	6114000000	7504700000	6155600000	6349900000	25	29	25	306
O14908;O14908-2;K7EM11;K7ELJ2;K7ESN1	O14908;O14908-2;K7EM11	8;5;4;1;1	8;5;4;1;1	7;4;3;1;1	242700000	295850000	363030000	PDZ domain-containing protein GIPC1	GIPC1	;;	5	8	8	7	7	7	7	7	7	7	6	6	6	36.9	36.9	33.3	36.049	333	333;236;128;40;159	1	105	0	22.629	34.2	34.2	34.2	243450000	293890000	279420000	284760000	3	5	4	42
O14929;O14929-2;F8W9G7;F8WEW1	O14929;O14929-2	15;11;3;2	15;11;3;2	15;11;3;2	521130000	439840000	521430000	Histone acetyltransferase type B catalytic subunit	HAT1	;	4	15	15	15	9	10	11	9	10	11	9	10	11	59.7	59.7	59.7	49.512	419	419;334;125;46	1	152	0	133.65	37.2	34.6	37	405400000	495750000	495840000	510200000	8	6	8	90
O14933;O14933-2;E9PQT7;E9PKW8	O14933;O14933-2	6;4;2;1	6;4;2;1	6;4;2;1	264470000	227220000	307680000	Ubiquitin/ISG15-conjugating enzyme E2 L6	UBE2L6	;	4	6	6	6	6	5	5	6	5	5	6	5	5	49	49	49	17.769	153	153;87;127;65	1	94	0	45.832	49	48.4	48.4	201030000	356410000	318230000	348240000	5	5	6	48
O14949	O14949	5	5	5	256840000	243190000	194280000	Cytochrome b-c1 complex subunit 8	UQCRQ		1	5	5	5	4	4	5	4	4	5	4	4	5	54.9	54.9	54.9	9.9062	82	82	1	54	0	8.3832	45.1	42.7	54.9	184860000	288580000	294680000	252950000	4	3	4	32
O14964;O14964-2;I3L1P5;I3L2H4;I3L165;I3L1E3	O14964;O14964-2;I3L1P5	8;7;5;2;2;2	8;7;5;2;2;2	8;7;5;2;2;2	190190000	229910000	175790000	Hepatocyte growth factor-regulated tyrosine kinase substrate	HGS	;;	6	8	8	8	8	7	8	8	7	8	8	7	8	12	12	12	86.191	777	777;690;263;59;71;292	1	91	0	21.236	12	11.1	12	182330000	237420000	203410000	206760000	4	3	4	46
O14965;Q5QPD4;A3KFJ0	O14965;Q5QPD4;A3KFJ0	2;1;1	2;1;1	2;1;1	0	0	40577000	Aurora kinase A	AURKA	;;	3	2	2	2	1	1	2	1	1	2	1	1	2	7.2	7.2	7.2	45.809	403	403;271;347	1	20	0	7.6576	3.7	3.7	7.2	47610000	6328000	20060000	54609000	0	1	1	3
O14967;D6RAZ4	O14967	11;4	11;4	11;4	207350000	165180000	238240000	Calmegin	CLGN		2	11	11	11	8	7	7	8	7	7	8	7	7	30.7	30.7	30.7	70.038	610	610;179	1	100	0	42.895	22.1	17.4	17.4	183230000	216630000	171800000	211390000	3	2	3	40
O14974;O14974-4;O14974-5;O14974-3;O14974-2;F8VZN8;H0YHI8;H0YIS3;H0YIS4;H0YIM2;H0YHL8;F8VW28;H0YIL7	O14974;O14974-4;O14974-5;O14974-3;O14974-2;F8VZN8	17;16;15;15;15;11;7;5;5;4;2;1;1	17;16;15;15;15;11;7;5;5;4;2;1;1	17;16;15;15;15;11;7;5;5;4;2;1;1	252240000	257400000	246750000	Protein phosphatase 1 regulatory subunit 12A	PPP1R12A	;;;;;	13	17	17	17	11	14	10	11	14	10	11	14	10	20.6	20.6	20.6	115.28	1030	1030;971;943;974;995;692;367;234;299;188;210;97;161	1	156	0	32.374	14.9	18.5	11.8	267110000	238820000	265880000	251720000	5	4	3	48
O14976-2;O14976;D6RAW3;H0Y8H5	O14976-2;O14976	6;6;2;1	6;6;2;1	6;6;2;1	36034000	36734000	37829000	Cyclin-G-associated kinase	GAK	;	4	6	6	6	3	3	4	3	3	4	3	3	4	6.7	6.7	6.7	134.46	1232	1232;1311;138;467	1	39	0	10.841	3.3	3	4.5	30361000	40015000	35533000	36485000	3	0	1	14
O14979-3;O14979-2;O14979	O14979-3;O14979-2;O14979	9;9;8	8;8;7	8;8;7	379740000	288180000	306660000	Heterogeneous nuclear ribonucleoprotein D-like	HNRNPDL	;;	3	9	8	8	8	6	6	7	5	5	7	5	5	40.2	36.9	36.9	27.191	244	244;301;420	1	98	0	64.364	39.8	32.4	36.5	425510000	486030000	269000000	238450000	6	1	3	61
O14980;C9JKM9;C9J673;C9IZS4;C9JQ02;C9JV99;F8WF71;C9IYM2;H7BZC5;C9JF49	O14980	40;11;9;6;6;6;5;4;4;3	40;11;9;6;6;6;5;4;4;3	40;11;9;6;6;6;5;4;4;3	3517700000	3589500000	3587800000	Exportin-1	XPO1		10	40	40	40	40	36	35	40	36	35	40	36	35	47.2	47.2	47.2	123.38	1071	1071;179;132;94;95;100;82;62;72;59	1	719	0	323.31	47.2	42.5	41.1	3350400000	4129500000	3819600000	3589900000	44	44	41	484
O15031;E2PU09;A6QRG9;A6QRH1;H0Y7X5;H0Y6J7;H0YAM9;F5H3A2;B4DHQ7;O60486;Q9Y4D7	O15031	32;7;5;2;1;1;1;1;1;1;1	32;7;5;2;1;1;1;1;1;1;1	32;7;5;2;1;1;1;1;1;1;1	512450000	456330000	508530000	Plexin-B2	PLXNB2		11	32	32	32	28	24	27	28	24	27	28	24	27	26.6	26.6	26.6	205.12	1838	1838;477;234;161;84;189;231;307;615;1568;1925	1	321	0	110.74	24.6	18.9	21.8	516010000	631300000	556970000	540570000	19	15	12	163
O15042-2;O15042;E7ET15;O15042-3;C9JB80;E7EW00;H0Y8D9;U3KPT1;C9JDJ7;C9J5L1;H7C4V2;H7C4P4	O15042-2;O15042;E7ET15;O15042-3;C9JB80	9;9;8;6;5;3;3;2;2;2;2;1	9;9;8;6;5;3;3;2;2;2;2;1	9;9;8;6;5;3;3;2;2;2;2;1	319020000	359400000	470060000	U2 snRNP-associated SURP motif-containing protein	U2SURP	;;;;	12	9	9	9	7	7	7	7	7	7	7	7	7	10.3	10.3	10.3	118.23	1028	1028;1029;1028;620;487;425;439;125;130;161;290;94	1	106	0	19.298	7.4	7.4	7.8	560120000	345830000	719250000	459220000	3	3	4	49
O15067;F5GWT9;H0YGH1;J3KT98;J3QSG0;J3QSH6;J3KTL4;J3KTQ5;J3QL39	O15067;F5GWT9	28;17;4;3;3;3;2;1;1	28;17;4;3;3;3;2;1;1	28;17;4;3;3;3;2;1;1	648410000	708050000	661970000	Phosphoribosylformylglycinamidine synthase	PFAS	;	9	28	28	28	23	20	24	23	20	24	23	20	24	32.1	32.1	32.1	144.73	1338	1338;914;385;116;131;135;103;62;87	1	277	0	160.83	27.4	23.1	26.2	533740000	740620000	798230000	782040000	17	12	13	134
O15091-4;O15091-2;O15091;O15091-3	O15091-4;O15091-2;O15091	3;3;3;1	3;3;3;1	3;3;3;1	25712000	23387000	27700000	Mitochondrial ribonuclease P protein 3	KIAA0391	;;	4	3	3	3	3	3	3	3	3	3	3	3	3	7	7	7	56.486	488	488;567;583;211	1	31	0	4.9118	7	7	7	19121000	33249000	26920000	36197000	1	2	2	15
O15116;E5RJ47;E5RH18	O15116;E5RJ47;E5RH18	2;1;1	2;1;1	2;1;1	84356000	94645000	114140000	U6 snRNA-associated Sm-like protein LSm1	LSM1	;;	3	2	2	2	2	2	2	2	2	2	2	2	2	17.3	17.3	17.3	15.179	133	133;44;44	1	27	0	5.2561	17.3	17.3	17.3	116820000	94850000	112470000	125410000	2	2	0	13
O15118;K7EQ23;B4DET3	O15118;K7EQ23;B4DET3	11;7;7	11;7;7	11;7;7	463310000	434030000	419970000	Niemann-Pick C1 protein	NPC1	;;	3	11	11	11	9	9	9	9	9	9	9	9	9	11.9	11.9	11.9	142.17	1278	1278;971;960	1	156	0	79.244	9.6	9.1	9.8	458630000	476120000	525500000	384660000	7	5	6	84
O15121;E7EMA0	O15121	4;1	4;1	4;1	139920000	156500000	133850000	Sphingolipid delta(4)-desaturase DES1	DEGS1		2	4	4	4	4	4	2	4	4	2	4	4	2	17	17	17	37.866	323	323;261	1	61	0	27.864	17	17	9.9	109110000	144180000	200950000	113420000	3	1	2	30
O15127;H3BV04;H3BN93;H3BUB6;H3BPL9	O15127;H3BV04;H3BN93;H3BUB6;H3BPL9	2;1;1;1;1	2;1;1;1;1	2;1;1;1;1	63355000	54173000	78904000	Secretory carrier-associated membrane protein 2	SCAMP2	;;;;	5	2	2	2	2	2	2	2	2	2	2	2	2	9.7	9.7	9.7	36.648	329	329;194;236;254;278	1	45	0	16.637	9.7	9.7	9.7	111260000	79832000	45773000	70898000	1	1	2	23
O15143;C9J4Z7;F8VXW2;C9JEY1;C9JQM8;C9JFG9;C9J6C8;C9JBJ7;C9K057;C9JTT6;C9JM51;F8WEB3	O15143	15;6;6;6;6;6;6;5;5;4;1;1	15;6;6;6;6;6;6;5;5;4;1;1	14;6;6;6;6;6;6;5;5;4;1;1	1444100000	1477300000	1386400000	Actin-related protein 2/3 complex subunit 1B	ARPC1B		12	15	15	14	14	15	15	14	15	15	13	14	14	48.7	48.7	42.5	40.949	372	372;128;130;130;132;132;132;102;108;82;21;32	1	280	0	133.33	48.7	48.7	48.7	1295400000	1587900000	1713500000	1504800000	18	15	14	191
O15144;C9JTV5;G5E9J0;H7C3F9;G5E9S7	O15144	17;6;6;4;2	17;6;6;4;2	17;6;6;4;2	1645000000	1646100000	1628700000	Actin-related protein 2/3 complex subunit 2	ARPC2		5	17	17	17	13	13	13	13	13	13	13	13	13	67.7	67.7	67.7	34.333	300	300;89;91;165;38	1	285	0	77.981	44.3	41.7	41.7	1694100000	1763900000	1749600000	1661100000	17	15	14	175
O15145;C9JZD1;F8VR50	O15145;C9JZD1	8;4;3	8;4;3	8;4;3	637650000	677310000	643300000	Actin-related protein 2/3 complex subunit 3	ARPC3	;	3	8	8	8	7	7	5	7	7	5	7	7	5	42.7	42.7	42.7	20.546	178	178;99;84	1	122	0	35.487	36.5	36.5	30.9	635850000	743160000	590790000	573530000	9	5	5	72
O15160-2;O15160;E7EQB9;D6RDJ3;H0Y723	O15160-2;O15160;E7EQB9	5;5;4;2;1	5;5;4;2;1	5;5;4;2;1	53099000	57111000	0	DNA-directed RNA polymerases I and III subunit RPAC1	POLR1C	;;	5	5	5	5	3	2	2	3	2	2	3	2	2	24.9	24.9	24.9	38.646	342	342;346;296;124;140	1	46	0	23.655	13.7	7.6	10.8	47156000	46227000	38298000	23412000	0	1	2	13
O15173;O15173-2;U3KQM0;D3DNX8	O15173;O15173-2;U3KQM0	10;10;5;1	10;10;5;1	9;9;4;1	793830000	790710000	828250000	Membrane-associated progesterone receptor component 2	PGRMC2	;;	4	10	10	9	10	9	9	10	9	9	9	8	8	39.5	39.5	39.5	23.818	223	223;247;91;44	1	151	0	113.08	39.5	39.5	39.5	843270000	796340000	934280000	911800000	8	10	7	81
O15212;A2AB88	O15212;A2AB88	10;7	10;7	10;7	777220000	757530000	838210000	Prefoldin subunit 6	PFDN6	;	2	10	10	10	9	10	9	9	10	9	9	10	9	55	55	55	14.582	129	129;103	1	154	0	78.274	55	55	55	791240000	858720000	897580000	851240000	7	9	7	91
O15258;Q5T093;Q5T092;Q5T091	O15258;Q5T093;Q5T092;Q5T091	4;3;3;3	4;3;3;3	4;3;3;3	240270000	288190000	261510000	Protein RER1	RER1	;;;	4	4	4	4	3	4	4	3	4	4	3	4	4	19.4	19.4	19.4	22.958	196	196;117;158;187	1	78	0	15.64	13.8	19.4	19.4	303150000	153640000	398160000	229580000	3	4	4	43
O15269;O15269-2	O15269	10;3	10;3	10;3	115720000	92031000	98945000	Serine palmitoyltransferase 1	SPTLC1		2	10	10	10	7	5	4	7	5	4	7	5	4	26	26	26	52.743	473	473;143	1	71	0	20.019	19.7	12.5	8.9	57544000	184790000	106960000	74410000	2	3	3	22
O15270;H0YJV2	O15270	3;1	3;1	3;1	0	18302000	0	Serine palmitoyltransferase 2	SPTLC2		2	3	3	3	2	3	1	2	3	1	2	3	1	7.5	7.5	7.5	62.924	562	562;407	1	20	0	10.338	5.5	7.5	2.3	20693000	19146000	19257000	8001700	0	2	0	6
O15294;O15294-3;O15294-2;O15294-4;C9JZL3;H7C2T7	O15294;O15294-3;O15294-2;O15294-4	17;15;12;9;4;2	17;15;12;9;4;2	17;15;12;9;4;2	261890000	269920000	297810000	UDP-N-acetylglucosamine--peptide N-acetylglucosaminyltransferase 110 kDa subunit	OGT	;;;	6	17	17	17	13	11	14	13	11	14	13	11	14	21.9	21.9	21.9	116.92	1046	1046;1036;920;665;156;211	1	164	0	57.034	18.2	13.6	18.2	497460000	209100000	221070000	405510000	5	1	3	41
O15305;H3BRM0;H3BV55;B7Z6R0;H3BR08;H3BM92;H3BV34;H3BT06;H3BNY9;H3BPH4;B7Z419;F5H0W0	O15305;H3BRM0;H3BV55;B7Z6R0;H3BR08;H3BM92;H3BV34;H3BT06;H3BNY9;H3BPH4	4;3;3;3;2;2;2;2;2;2;1;1	4;3;3;3;2;2;2;2;2;2;1;1	4;3;3;3;2;2;2;2;2;2;1;1	147170000	186660000	192400000	Phosphomannomutase 2;Phosphomannomutase	PMM2	;;;;;;;;;	12	4	4	4	3	4	4	3	4	4	3	4	4	22.8	22.8	22.8	28.082	246	246;155;219;119;65;66;70;90;91;142;121;163	1	50	0	24.615	18.3	22.8	22.8	179900000	107600000	217740000	205150000	3	4	3	43
O15355	O15355	16	16	16	614720000	616570000	574860000	Protein phosphatase 1G	PPM1G		1	16	16	16	14	14	14	14	14	14	14	14	14	43.4	43.4	43.4	59.271	546	546	1	176	0	64.139	39.4	38.6	40.1	626520000	666570000	721130000	593400000	8	8	7	99
O15357;O15357-2;F5GY16;H7BXR2;F5H588;H0YFZ4;F5GXI6;H0Y5Q9;H7C2V3;H7C292;Q92835-3;Q92835-2;Q92835	O15357;O15357-2	38;33;6;3;1;1;1;1;1;1;1;1;1	38;33;6;3;1;1;1;1;1;1;1;1;1	38;33;6;3;1;1;1;1;1;1;1;1;1	1059000000	1123200000	1143200000	Phosphatidylinositol 3,4,5-trisphosphate 5-phosphatase 2	INPPL1	;	13	38	38	38	29	33	28	29	33	28	29	33	28	38.4	38.4	38.4	138.6	1258	1258;1016;127;149;33;197;596;810;941;941;976;1188;1189	1	453	0	194.53	29.9	34.3	28.3	992220000	1250900000	1174700000	1073500000	22	22	19	222
O15371;B4DVY1;B0QYA5;B0QYA6;B0QYA7;B0QYA4;B0QYA8	O15371;B4DVY1;B0QYA5	20;19;10;5;4;3;3	20;19;10;5;4;3;3	20;19;10;5;4;3;3	1137600000	1426600000	1376700000	Eukaryotic translation initiation factor 3 subunit D	EIF3D	;;	7	20	20	20	18	16	16	18	16	16	18	16	16	60	60	60	63.972	548	548;499;269;173;186;105;123	1	261	0	224.53	50.9	47.6	44.3	1364400000	1256500000	1397800000	1481200000	16	14	13	169
O15382;B3KSI3;M0QXF9;M0QZ10;O15382-2;M0QZP4;M0R2K7	O15382;B3KSI3;M0QXF9;M0QZ10;O15382-2;M0QZP4	12;11;11;10;10;8;2	12;11;11;10;10;8;2	12;11;11;10;10;8;2	206810000	224380000	218540000	Branched-chain-amino-acid aminotransferase, mitochondrial;Branched-chain-amino-acid aminotransferase	BCAT2	;;;;;	7	12	12	12	11	9	8	11	9	8	11	9	8	42.9	42.9	42.9	44.287	392	392;352;445;405;300;313;108	1	123	0	43.707	40.8	30.4	29.3	196020000	237130000	215210000	235150000	8	4	4	56
O15397;O15397-2;F5H244;F5H2I3;H0YH64	O15397;O15397-2	13;10;3;2;1	12;9;3;2;1	12;9;3;2;1	162750000	155820000	168280000	Importin-8	IPO8	;	5	13	12	12	11	10	9	10	9	8	10	9	8	14.6	13.6	13.6	119.94	1037	1037;832;167;46;167	1	114	0	34.044	12.7	11.2	10.4	106990000	190900000	173580000	152840000	4	5	4	49
O15400-2;O15400	O15400-2;O15400	4;4	4;4	4;4	213410000	89492000	0	Syntaxin-7	STX7	;	2	4	4	4	4	3	2	4	3	2	4	3	2	24.3	24.3	24.3	27.4	239	239;261	1	47	0	10.983	24.3	17.6	12.1	65129000	252970000	89903000	70759000	1	2	0	9
O15427;J3QQV2;J3QSC3;J3QQS9;J3KTI8;J3KT83;J3QRA0;J3QLE3;J3KTM6;J3QRU2;J3QRP8	O15427;J3QQV2;J3QSC3	11;7;7;5;5;4;4;2;2;2;1	11;7;7;5;5;4;4;2;2;2;1	11;7;7;5;5;4;4;2;2;2;1	1753400000	1880900000	1699400000	Monocarboxylate transporter 4	SLC16A3	;;	11	11	11	11	10	10	10	10	10	10	10	10	10	23.4	23.4	23.4	49.469	465	465;263;291;235;306;219;223;135;157;163;79	1	169	0	40.154	21.7	21.9	21.7	2160500000	1953500000	2052500000	1723500000	8	7	5	92
O15438;O15438-4;O15438-2;O15438-5	O15438;O15438-4;O15438-2	6;6;3;1	6;6;3;1	6;6;3;1	43827000	41310000	41225000	Canalicular multispecific organic anion transporter 2	ABCC3	;;	4	6	6	6	3	3	4	3	3	4	3	3	4	5.2	5.2	5.2	169.34	1527	1527;1578;1238;572	1	48	0	9.5271	2.5	2.5	3.7	54238000	30100000	27302000	52853000	1	1	1	11
O15460-2;O15460;E7ENX0;E7EPI9;C9JX45;A8MXE0;E7ERI1;C9JCP0;C9JN43;C9JIG4;C9JFJ1	O15460-2;O15460	17;17;5;5;4;4;4;3;2;2;1	17;17;5;5;4;4;4;3;2;2;1	17;17;5;5;4;4;4;3;2;2;1	818260000	762100000	714940000	Prolyl 4-hydroxylase subunit alpha-2	P4HA2	;	11	17	17	17	14	13	12	14	13	12	14	13	12	37	37	37	60.632	533	533;535;204;236;153;167;184;146;101;114;50	1	188	0	38.051	31.7	30	26.8	429270000	562970000	836130000	796080000	9	5	4	87
O15498;B4DR94;H7C3K7	O15498;B4DR94	8;6;1	8;6;1	8;6;1	254330000	261180000	341750000	Synaptobrevin homolog YKT6	YKT6	;	3	8	8	8	7	8	8	7	8	8	7	8	8	51.5	51.5	51.5	22.417	198	198;164;29	1	123	0	49.342	44.9	51.5	51.5	150040000	321970000	336980000	328470000	5	3	4	41
O15511;B1ALC0;O15511-2	O15511;B1ALC0;O15511-2	6;5;5	6;5;5	5;4;4	409830000	436930000	436450000	Actin-related protein 2/3 complex subunit 5	ARPC5	;;	3	6	6	5	4	4	4	4	4	4	3	3	3	62.3	62.3	57	16.32	151	151;135;154	1	58	0	42.819	34.4	34.4	49	329780000	537960000	547900000	412820000	3	2	2	41
O43143	O43143	32	32	31	1359000000	1363100000	1265900000	Pre-mRNA-splicing factor ATP-dependent RNA helicase DHX15	DHX15		1	32	32	31	28	26	25	28	26	25	27	25	24	50.2	50.2	49.1	90.932	795	795	1	415	0	161.28	44.5	42.8	41.5	1059200000	1702700000	1326000000	1335500000	27	22	16	247
O43148;O43148-2;K7EP06;K7EPP5;F5H2D9;K7ERH6	O43148;O43148-2;K7EP06	6;6;3;2;2;1	6;6;3;2;2;1	6;6;3;2;2;1	96859000	85328000	84785000	mRNA cap guanine-N7 methyltransferase	RNMT	;;	6	6	6	6	5	5	5	5	5	5	5	5	5	15.8	15.8	15.8	54.843	476	476;504;298;101;234;114	1	68	0	10.366	12.8	14.1	14.1	73364000	113530000	88433000	90224000	2	3	1	25
O43156	O43156	6	6	6	61309000	50578000	87936000	TELO2-interacting protein 1 homolog	TTI1		1	6	6	6	5	4	4	5	4	4	5	4	4	6.3	6.3	6.3	122.07	1089	1089	1	55	0	15.293	5.1	4.5	4.4	18956000	73382000	43435000	73249000	2	1	2	13
O43172-2;O43172	O43172-2;O43172	11;11	11;11	11;11	212500000	226330000	239020000	U4/U6 small nuclear ribonucleoprotein Prp4	PRPF4	;	2	11	11	11	8	7	8	8	7	8	8	7	8	29.9	29.9	29.9	58.32	521	521;522	1	100	0	23.489	21.5	19.4	20	273010000	297830000	227410000	284410000	3	4	3	40
O43175;Q5SZU1	O43175;Q5SZU1	16;13	16;13	16;13	1357000000	1330100000	1440700000	D-3-phosphoglycerate dehydrogenase	PHGDH	;	2	16	16	16	14	14	13	14	14	13	14	14	13	37.1	37.1	37.1	56.65	533	533;499	1	238	0	82.951	32.5	32.1	30.4	1313800000	1495100000	1526200000	1377900000	14	13	13	159
O43237;O43237-2;J3KRI4;B4E2E0;E7EPL8;J3KRZ2;H3BUM4	O43237;O43237-2	12;10;5;5;3;2;2	11;10;5;4;2;2;2	11;10;5;4;2;2;2	278570000	328750000	347030000	Cytoplasmic dynein 1 light intermediate chain 2	DYNC1LI2	;	7	12	11	11	11	7	10	10	6	9	10	6	9	37.8	35.2	35.2	54.099	492	492;415;167;271;209;92;186	1	126	0	43.684	34.8	22.4	35.4	315270000	316270000	256490000	394530000	5	7	8	66
O43242;B4DT72;H0YGV8;F5H8K4	O43242;B4DT72	28;20;4;1	28;20;4;1	28;20;4;1	1563300000	1411900000	1397100000	26S proteasome non-ATPase regulatory subunit 3	PSMD3	;	4	28	28	28	25	25	23	25	25	23	25	25	23	55.1	55.1	55.1	60.977	534	534;356;117;86	1	347	0	155.76	51.7	49.1	47	1297200000	1681400000	1643000000	1559900000	16	15	12	176
O43252	O43252	19	19	19	792720000	695340000	687440000	Bifunctional 3-phosphoadenosine 5-phosphosulfate synthase 1;Sulfate adenylyltransferase;Adenylyl-sulfate kinase	PAPSS1		1	19	19	19	17	16	13	17	16	13	17	16	13	45	45	45	70.832	624	624	1	238	0	63.124	40.9	35.7	32.7	732820000	958200000	752830000	667290000	5	7	5	85
O43264;A1A528;F5H3C1	O43264;A1A528	9;8;1	9;8;1	9;8;1	85401000	76693000	72580000	Centromere/kinetochore protein zw10 homolog	ZW10	;	3	9	9	9	5	5	5	5	5	5	5	5	5	15	15	15	88.828	779	779;672;135	1	75	0	20.525	7.3	7.2	7.2	92792000	51953000	71996000	55778000	1	3	1	30
O43290;E9PQI8	O43290	5;1	5;1	5;1	0	0	56107000	U4/U6.U5 tri-snRNP-associated protein 1	SART1		2	5	5	5	3	2	3	3	2	3	3	2	3	9.1	9.1	9.1	90.254	800	800;164	1	41	0	9.6157	5.1	3.4	5.2	57537000	33964000	22683000	46716000	1	1	1	14
O43292;O43292-2;E9PPZ9;E9PQ31;E9PLV6;E9PM11;E9PLG8;E9PM94	O43292;O43292-2;E9PPZ9;E9PQ31	8;7;4;4;3;2;1;1	8;7;4;4;3;2;1;1	8;7;4;4;3;2;1;1	123440000	147860000	132430000	Glycosylphosphatidylinositol anchor attachment 1 protein	GPAA1	;;;	8	8	8	8	5	6	5	5	6	5	5	6	5	13	13	13	67.622	621	621;561;260;265;234;158;81;98	1	65	0	12.002	9	9.3	7.7	86689000	107120000	169660000	247610000	0	3	3	18
O43293;O43293-2	O43293;O43293-2	2;1	2;1	2;1	12937000	13554000	14450000	Death-associated protein kinase 3	DAPK3	;	2	2	2	2	2	2	2	2	2	2	2	2	2	4.8	4.8	4.8	52.535	454	454;322	1	19	0.0002588	3.132	4.8	4.8	4.8	12385000	13302000	14410000	19288000	1	2	1	12
O43324;D6RBD7;C9J1V9;O43324-2;H0YAL7;D6RCQ0;H0YAH9	O43324;D6RBD7;C9J1V9;O43324-2;H0YAL7	9;7;7;7;6;2;1	9;7;7;7;6;2;1	9;7;7;7;6;2;1	427360000	412710000	484660000	Eukaryotic translation elongation factor 1 epsilon-1	EEF1E1;EEF1E1-BLOC1S5	;;;;	7	9	9	9	8	9	8	8	9	8	8	9	8	60.9	60.9	60.9	19.81	174	174;150;151;139;136;94;56	1	131	0	28.113	55.7	60.9	46.6	567810000	480520000	494870000	581200000	5	4	8	56
O43390;O43390-2;O43390-3;O43390-4;B4DT28;E7ETM7	O43390;O43390-2;O43390-3;O43390-4;B4DT28;E7ETM7	25;24;22;20;18;14	19;18;17;15;14;10	19;18;17;15;14;10	530370000	489030000	596590000	Heterogeneous nuclear ribonucleoprotein R	HNRNPR	;;;;;	6	25	19	19	24	18	23	18	13	17	18	13	17	47.1	37.8	37.8	70.942	633	633;636;595;535;494;473	1	243	0	72.523	46	33.6	42	601350000	629800000	523150000	775560000	10	4	9	104
O43396;K7ER96;G3V1K0;K7EML9;K7EPB7;K7EME7;K7EKG2	O43396;K7ER96;G3V1K0	14;13;8;6;2;2;1	14;13;8;6;2;2;1	14;13;8;6;2;2;1	994480000	929710000	990610000	Thioredoxin-like protein 1	TXNL1	;;	7	14	14	14	14	12	12	14	12	12	14	12	12	76.8	76.8	76.8	32.251	289	289;281;166;138;69;103;27	1	173	0	113.51	76.8	73	61.6	1004500000	1146100000	994090000	1045800000	12	12	8	118
O43399;O43399-5;O43399-7	O43399;O43399-5;O43399-7	13;13;13	13;13;13	3;3;3	1259500000	1232700000	1189000000	Tumor protein D54	TPD52L2	;;	3	13	13	3	11	10	12	11	10	12	2	2	2	62.6	62.6	13.6	22.237	206	206;220;229	1	196	0	225.08	59.2	53.9	59.2	1140800000	1437700000	1326100000	1300200000	10	11	9	116
O43427-2;O43427;E9PSD3;H0YCE7;E9PJW6	O43427-2;O43427;E9PSD3	5;5;3;2;2	5;5;3;2;2	5;5;3;2;2	0	53693000	55647000	Acidic fibroblast growth factor intracellular-binding protein	FIBP	;;	5	5	5	5	3	4	4	3	4	4	3	4	4	17.4	17.4	17.4	41.21	357	357;364;348;137;146	1	39	0	7.7978	10.4	14.8	12.9	19110000	32224000	53649000	48728000	2	2	1	17
O43432;O43432-3;O43432-4;F5H564;F5H8J4;Q5SWD0	O43432;O43432-3;O43432-4;F5H564;F5H8J4	21;21;18;17;16;1	15;15;12;12;11;1	11;11;11;11;11;1	185340000	232720000	218810000	Eukaryotic translation initiation factor 4 gamma 3	EIF4G3	;;;;	6	21	15	11	16	18	17	10	12	11	8	9	7	15.5	11.9	9.3	176.65	1585	1585;1591;1305;1189;1075;164	1	143	0	28.795	12.1	13.5	12.3	178850000	177050000	208520000	252440000	3	2	2	31
O43447;C9JQD4;A6NNE7;H0YEL5;A6NM32	O43447;C9JQD4;A6NNE7;H0YEL5	8;7;6;5;2	8;7;6;5;2	8;7;6;5;2	273400000	285760000	267420000	Peptidyl-prolyl cis-trans isomerase H;Peptidyl-prolyl cis-trans isomerase	PPIH	;;;	5	8	8	8	5	4	5	5	4	5	5	4	5	62.1	62.1	62.1	19.208	177	177;144;134;96;57	1	71	0	19.395	26.6	21.5	36.7	306810000	268160000	233260000	228750000	4	2	3	41
O43464-2;O43464-3;O43464;O43464-4;P83110-2;P83110	O43464-2;O43464-3;O43464;O43464-4	6;6;6;3;1;1	6;6;6;3;1;1	6;6;6;3;1;1	51856000	61170000	61945000	Serine protease HTRA2, mitochondrial	HTRA2	;;;	6	6	6	6	5	3	3	5	3	3	5	3	3	28	28	28	38.493	361	361;436;458;377;357;453	1	42	0	44.993	24.4	13	13	41270000	82530000	64202000	69301000	2	2	2	18
O43491;E9PHY5;O43491-4;E9PK52;O43491-3;E9PII3;O43491-2;H0Y5B0;Q6R5J7;E9PMV8;E9PQD2;E9PRG1;E9PIG0;Q6ZSX4;E9PMG5;E9PPC9;E9PJP4;E9PQN0;J3QS55;E9PN54	O43491;E9PHY5;O43491-4;E9PK52;O43491-3;E9PII3;O43491-2	25;24;22;21;19;18;18;9;7;6;4;3;3;3;3;2;1;1;1;1	25;24;22;21;19;18;18;9;7;6;4;3;3;3;3;2;1;1;1;1	23;22;20;19;17;16;16;9;7;6;4;3;3;3;3;2;1;1;0;1	596350000	644580000	655560000	Band 4.1-like protein 2	EPB41L2	;;;;;;	20	25	25	23	22	18	18	22	18	18	20	16	16	33.3	33.3	31.1	112.59	1005	1005;935;852;811;747;706;673;380;383;268;179;153;162;201;224;126;118;127;162;240	1	279	0	81.482	27.4	21.4	20.8	527260000	777390000	684230000	580130000	13	6	5	99
O43504;R4GMU8;E9PLX3	O43504;R4GMU8;E9PLX3	5;4;4	5;4;4	5;4;4	276440000	257780000	246530000	Ragulator complex protein LAMTOR5	LAMTOR5	;;	3	5	5	5	4	4	4	4	4	4	4	4	4	96.7	96.7	96.7	9.6138	91	91;79;90	1	68	0	191.54	70.3	70.3	70.3	234440000	317650000	251990000	228610000	4	4	2	43
O43583;F8VVL1	O43583;F8VVL1	7;5	7;5	7;5	70498000	45506000	96576000	Density-regulated protein	DENR	;	2	7	7	7	3	4	5	3	4	5	3	4	5	38.4	38.4	38.4	22.092	198	198;160	1	52	0	16.626	17.7	23.7	27.8	86547000	62684000	77916000	138170000	4	0	2	22
O43592;F8WDU6;F5GYW6;F5GZM3	O43592	23;8;4;3	23;8;4;3	23;8;4;3	369660000	380730000	425290000	Exportin-T	XPOT		4	23	23	23	18	15	15	18	15	15	18	15	15	33.2	33.2	33.2	109.96	962	962;201;60;228	1	239	0	96.923	27.5	20.8	19.5	346430000	452690000	388490000	422240000	11	8	5	98
O43615;M0QXU7;M0R301;M0QXM9;M0R124	O43615;M0QXU7	16;10;4;4;2	16;10;4;4;2	16;10;4;4;2	325230000	361500000	384820000	Mitochondrial import inner membrane translocase subunit TIM44	TIMM44	;	5	16	16	16	13	13	12	13	13	12	13	13	12	38.9	38.9	38.9	51.355	452	452;273;126;133;139	1	163	0	32.997	32.5	32.3	30.3	476030000	420320000	369920000	341710000	4	0	2	39
O43617;O43617-2;A6NKE1	O43617;O43617-2	5;4;2	5;4;2	5;4;2	158860000	186890000	170610000	Trafficking protein particle complex subunit 3	TRAPPC3	;	3	5	5	5	3	3	4	3	3	4	3	3	4	24.4	24.4	24.4	20.274	180	180;134;118	1	57	0	6.8967	15	14.4	20.6	213330000	181140000	190240000	179020000	2	1	2	27
O43633;M0R1T5;M0R1L7;M0QXX8	O43633;M0R1T5;M0R1L7	6;5;4;1	6;5;4;1	6;5;4;1	240980000	266230000	228200000	Charged multivesicular body protein 2a	CHMP2A	;;	4	6	6	6	4	5	5	4	5	5	4	5	5	23.4	23.4	23.4	25.104	222	222;227;159;55	1	57	0	19.015	14.9	23.4	23.4	255710000	244080000	244900000	242010000	1	3	3	24
O43657	O43657	3	3	3	101840000	115020000	78395000	Tetraspanin-6	TSPAN6		1	3	3	3	2	2	2	2	2	2	2	2	2	15.5	15.5	15.5	27.563	245	245	1	34	0	6.0696	9.8	10.2	10.2	131770000	73636000	108350000	73983000	1	2	1	14
O43674;E7EWP0;H0Y886;O43674-2;F8WDZ2;F8WDD2;H7C568	O43674;E7EWP0;H0Y886;O43674-2;F8WDZ2;F8WDD2	4;3;3;3;2;2;1	4;3;3;3;2;2;1	4;3;3;3;2;2;1	0	0	242810000	NADH dehydrogenase [ubiquinone] 1 beta subcomplex subunit 5, mitochondrial	NDUFB5	;;;;;	7	4	4	4	2	2	3	2	2	3	2	2	3	18.5	18.5	18.5	21.75	189	189;177;206;137;42;66;100	1	32	0.00026596	3.464	8.5	8.5	12.7	306410000	274730000	317660000	277000000	0	0	1	8
O43676;C9JKQ2	O43676;C9JKQ2	2;1	2;1	2;1	40253000	38706000	42809000	NADH dehydrogenase [ubiquinone] 1 beta subcomplex subunit 3	NDUFB3	;	2	2	2	2	2	2	2	2	2	2	2	2	2	21.4	21.4	21.4	11.402	98	98;65	1	25	0	4.624	21.4	21.4	21.4	39280000	40874000	41428000	44652000	1	1	1	17
O43681;K7ERW9	O43681	11;5	11;5	11;5	742350000	717320000	775740000	ATPase ASNA1	ASNA1		2	11	11	11	11	10	10	11	10	10	11	10	10	47.7	47.7	47.7	38.792	348	348;200	1	189	0	81.703	47.7	42.5	44	715110000	900130000	798860000	834920000	15	8	9	125
O43684-2;O43684;J3QT28;B4DDM6;J3QSX4	O43684-2;O43684;J3QT28;B4DDM6	15;15;14;10;7	15;15;14;10;7	15;15;14;10;7	1380100000	1421800000	1525000000	Mitotic checkpoint protein BUB3	BUB3	;;;	5	15	15	15	14	13	13	14	13	13	14	13	13	66.6	66.6	66.6	36.954	326	326;328;278;248;145	1	218	0	103.94	64.4	52.5	52.5	1271900000	1658700000	1539000000	1505400000	11	11	12	139
O43688;O43688-2;K7EMK9;O43688-3;K7ENH4	O43688;O43688-2;K7EMK9;O43688-3	4;4;3;3;1	4;4;3;3;1	4;4;3;3;1	84267000	0	92144000	Lipid phosphate phosphohydrolase 2	PPAP2C	;;;	5	4	4	4	3	2	3	3	2	3	3	2	3	18.1	18.1	18.1	32.573	288	288;309;166;232;136	1	30	0	38.772	13.9	7.6	11.1	75743000	121820000	70391000	71155000	1	1	2	14
O43707;O43707-2;F5GXS2;O43707-3;K7EP19;D6RH00	O43707;O43707-2;F5GXS2;O43707-3	68;49;39;39;7;1	68;49;39;39;7;1	19;12;12;12;4;0	42879000000	45018000000	42719000000	Alpha-actinin-4	ACTN4	;;;	6	68	68	19	66	64	66	66	64	66	19	18	18	79.1	79.1	24.7	104.85	911	911;692;521;521;105;72	1	1632	0	323.31	79	74.8	74.9	42188000000	49043000000	48971000000	46112000000	120	117	119	1418
O43709;O43709-3;H7C170	O43709;O43709-3;H7C170	3;3;2	3;3;2	3;3;2	62746000	58374000	68908000	Probable 18S rRNA (guanine-N(7))-methyltransferase	WBSCR22	;;	3	3	3	3	3	2	3	3	2	3	3	2	3	16.4	16.4	16.4	31.88	281	281;298;128	1	37	0	7.5196	16.4	13.5	16.4	56452000	69979000	47439000	81653000	2	2	3	19
O43719;Q5H919;Q5H918	O43719	12;5;5	12;5;5	12;5;5	164220000	154950000	144630000	HIV Tat-specific factor 1	HTATSF1		3	12	12	12	8	8	7	8	8	7	8	8	7	24	24	24	85.852	755	755;223;244	1	103	0	54.542	13.6	14.7	12.1	120460000	181680000	169860000	168180000	3	2	1	31
O43752;O43752-2	O43752;O43752-2	4;2	4;2	4;2	43380000	0	0	Syntaxin-6	STX6	;	2	4	4	4	4	1	2	4	1	2	4	1	2	24.7	24.7	24.7	29.176	255	255;154	1	28	0	9.8864	24.7	5.5	10.6	52980000	72510000	15663000	40908000	1	0	1	10
O43760;Q3KQZ2;K7ELS8;K7ELD9;K7ENG9;K7EJ35	O43760;Q3KQZ2;K7ELS8;K7ELD9;K7ENG9	4;4;3;2;2;1	4;4;3;2;2;1	4;4;3;2;2;1	129870000	129260000	115650000	Synaptogyrin-2	SYNGR2	;;;;	6	4	4	4	4	4	3	4	4	3	4	4	3	16.1	16.1	16.1	24.81	224	224;275;135;65;113;168	1	40	0	5.7733	16.1	16.1	12.5	103260000	110290000	189030000	95998000	3	1	2	17
O43765;K7EMD6;K7ERW5	O43765;K7EMD6	8;6;1	8;6;1	8;6;1	261630000	293200000	309690000	Small glutamine-rich tetratricopeptide repeat-containing protein alpha	SGTA	;	3	8	8	8	6	6	6	6	6	6	6	6	6	30	30	30	34.063	313	313;162;68	1	99	0	33.499	24	24	24	299230000	311960000	319070000	302270000	5	4	4	52
O43772;C9JPE1;B4DWZ5	O43772;C9JPE1;B4DWZ5	5;4;4	5;4;4	5;4;4	58447000	0	0	Mitochondrial carnitine/acylcarnitine carrier protein	SLC25A20	;;	3	5	5	5	3	0	1	3	0	1	3	0	1	20.9	20.9	20.9	32.943	301	301;228;251	1	23	0	5.5415	10.6	0	5.3	16479000	53372000	0	8999700	1	0	0	9
O43809;H3BND3;H3BV41	O43809;H3BND3	12;9;5	12;9;5	12;9;5	1075400000	1076900000	1110600000	Cleavage and polyadenylation specificity factor subunit 5	NUDT21	;	3	12	12	12	11	11	11	11	11	11	11	11	11	54.6	54.6	54.6	26.227	227	227;149;71	1	201	0	71.477	46.3	51.1	51.1	1040500000	1214400000	1160300000	1081400000	9	9	10	106
O43813;E9PHS0;F8WDS9;H7C2E3	O43813;E9PHS0	12;7;3;3	12;7;3;3	12;7;3;3	246540000	272190000	212070000	LanC-like protein 1	LANCL1	;	4	12	12	12	8	5	7	8	5	7	8	5	7	41.6	41.6	41.6	45.283	399	399;196;82;147	1	91	0	50.692	31.1	17	26.3	158860000	388610000	207370000	244100000	6	2	4	50
O43819;C9JBU1	O43819;C9JBU1	2;1	2;1	2;1	19974000	0	0	Protein SCO2 homolog, mitochondrial	SCO2	;	2	2	2	2	2	1	2	2	1	2	2	1	2	10.5	10.5	10.5	29.81	266	266;136	1	23	0	3.9459	10.5	6.8	10.5	50643000	21286000	15894000	28305000	1	0	1	11
O43837;O43837-2;O43837-3	O43837;O43837-2	10;9;4	10;9;4	10;9;4	230670000	210660000	233860000	Isocitrate dehydrogenase [NAD] subunit beta, mitochondrial	IDH3B	;	3	10	10	10	8	8	8	8	8	8	8	8	8	32.5	32.5	32.5	42.183	385	385;383;233	1	124	0	24.616	30.1	26	26.2	231770000	256820000	224430000	249860000	6	6	5	67
O43852;O43852-3;O43852-6;O43852-5;O43852-15;O43852-10;H0Y875;O43852-9;O43852-13;O43852-14;O43852-11;O43852-12	O43852;O43852-3;O43852-6;O43852-5;O43852-15;O43852-10;H0Y875;O43852-9	22;22;16;15;13;13;12;12;9;9;9;4	22;22;16;15;13;13;12;12;9;9;9;4	5;5;5;5;0;5;0;2;5;5;5;0	4658700000	4454300000	4991200000	Calumenin	CALU	;;;;;;;	12	22	22	5	20	21	19	20	21	19	5	5	5	72.4	72.4	13.7	37.106	315	315;323;265;229;164;224;147;154;139;147;170;74	1	455	0	323.31	63.2	72.4	63.2	4599100000	5021500000	5162900000	4999500000	22	26	25	296
O43852-2;O43852-4;O43852-8;O43852-7	O43852-2;O43852-4;O43852-8	20;20;10;7	3;3;3;3	3;3;3;3	243690000	254810000	237240000	Calumenin	CALU	;;	4	20	3	3	18	18	16	3	2	2	3	2	2	74.3	15.6	15.6	37.134	315	315;323;201;161	1	36	0	17.907	65.1	65.7	56.5	178740000	280950000	291370000	269410000	3	2	0	17
O43854-2;O43854	O43854-2;O43854	11;11	11;11	11;11	135340000	150470000	144670000	EGF-like repeat and discoidin I-like domain-containing protein 3	EDIL3	;	2	11	11	11	5	7	9	5	7	9	5	7	9	34.5	34.5	34.5	52.747	470	470;480	1	91	0	28.522	16.6	22.8	28.7	158170000	103680000	165060000	205420000	4	6	6	48
O43865;O43865-2	O43865;O43865-2	11;9	11;9	6;4	167870000	223010000	191400000	Putative adenosylhomocysteinase 2	AHCYL1	;	2	11	11	6	7	8	7	7	8	7	2	3	3	26.6	26.6	16.4	58.951	530	530;483	1	102	0	29.235	14.9	17.9	15.7	307360000	214560000	223110000	175490000	4	3	4	44
O43924;B8ZZK5;C9IZ52	O43924;B8ZZK5;C9IZ52	3;2;2	3;2;2	3;2;2	0	90698000	0	Retinal rod rhodopsin-sensitive cGMP 3,5-cyclic phosphodiesterase subunit delta	PDE6D	;;	3	3	3	3	1	2	1	1	2	1	1	2	1	28.7	28.7	28.7	17.42	150	150;93;104	1	19	0	4.8521	8	20.7	12.7	71051000	19283000	91130000	64113000	1	2	0	7
O43929;O43929-2;O43929-3;B7Z632;C9JGH7;C9J2X8;Q53SE3;Q5THS9;Q96NJ5-3;Q96NJ5-2;Q96NJ5	O43929;O43929-2;O43929-3	7;5;5;3;2;2;2;1;1;1;1	7;5;5;3;2;2;2;1;1;1;1	5;3;3;2;2;2;2;1;1;1;1	33154000	36609000	46785000	Origin recognition complex subunit 4	ORC4	;;	11	7	7	5	3	5	3	3	5	3	2	4	1	20.4	20.4	15.1	50.377	436	436;352;362;219;127;128;145;176;551;584;620	1	50	0	9.0642	7.3	14.4	8	25082000	28433000	46821000	42216000	1	2	3	19
O60216;E5RJW1;E5RJK5;E5RFV8;E5RIN7;Q9H4I0;E5RG18;E5RI01;E5RFZ5;Q9H4I0-2	O60216	5;2;2;2;2;2;1;1;1;1	5;2;2;2;2;2;1;1;1;1	5;2;2;2;2;2;1;1;1;1	37102000	36537000	34828000	Double-strand-break repair protein rad21 homolog	RAD21		10	5	5	5	4	3	3	4	3	3	4	3	3	9	9	9	71.689	631	631;120;124;225;228;556;69;135;176;521	1	38	0	7.0025	7.4	5.1	5.1	34275000	43767000	37816000	35546000	3	2	3	22
O60220	O60220	4	4	4	112910000	103860000	120850000	Mitochondrial import inner membrane translocase subunit Tim8 A	TIMM8A		1	4	4	4	4	4	3	4	4	3	4	4	3	68	68	68	10.998	97	97	1	49	0	35.473	68	68	38.1	137430000	127090000	119650000	123580000	1	4	2	30
O60231;Q5SQH5;A2AB15	O60231	13;6;1	12;6;1	12;6;1	234670000	222300000	199990000	Putative pre-mRNA-splicing factor ATP-dependent RNA helicase DHX16	DHX16		3	13	12	12	10	11	10	9	10	9	9	10	9	17	16.1	16.1	119.26	1041	1041;560;295	1	135	0	40.918	12.9	13.9	13.3	130850000	176840000	594750000	134860000	5	6	5	63
O60256;O60256-3;O60256-2;E7EPA1;O60256-4;C9K0K7;I3L0S1;C9JJS3;C9JDU5;I3L331;I3L164;C9JDH0;E7EW35;I3L4G9;I3L1T1;I3L3B8;I3L2J4	O60256;O60256-3;O60256-2;E7EPA1;O60256-4;C9K0K7;I3L0S1;C9JJS3	14;11;11;10;10;9;9;8;6;4;4;4;4;3;1;1;1	14;11;11;10;10;9;9;8;6;4;4;4;4;3;1;1;1	12;9;9;8;8;8;7;7;6;4;4;4;4;2;1;1;1	332870000	288910000	313170000	Phosphoribosyl pyrophosphate synthase-associated protein 2	PRPSAP2	;;;;;;;	17	14	14	12	13	10	10	13	10	10	11	9	8	55.3	55.3	49.6	40.925	369	369;320;329;268;283;244;260;194;176;93;104;140;161;143;47;57;78	1	155	0	46.165	50.1	38.8	36.3	267170000	448310000	248930000	301100000	11	5	2	53
O60264;P28370-2;P28370	O60264	6;2;2	6;2;2	6;2;2	51690000	36841000	37130000	SWI/SNF-related matrix-associated actin-dependent regulator of chromatin subfamily A member 5	SMARCA5		3	6	6	6	3	3	3	3	3	3	3	3	3	6	6	6	121.9	1052	1052;1042;1054	1	42	0	8.8758	2.9	3	2.9	22051000	46456000	35218000	37355000	2	1	0	10
O60271-4;O60271-2;O60271;O60271-5;O60271-3;O60271-9;H0YBE9;H0YBS5;E9PFH7;Q9UPT6;Q9UPT6-2;H0Y981;D6RHI8	O60271-4;O60271-2;O60271;O60271-5;O60271-3;O60271-9	28;28;27;22;21;21;3;3;3;3;2;1;1	28;28;27;22;21;21;3;3;3;3;2;1;1	28;28;27;22;21;21;3;3;3;3;2;1;1	627610000	584730000	686030000	C-Jun-amino-terminal kinase-interacting protein 4	SPAG9	;;;;;	13	28	28	28	24	22	23	24	22	23	24	22	23	29.3	29.3	29.3	144.68	1307	1307;1311;1321;931;945;1177;174;250;1330;1336;250;152;156	1	311	0	148.94	25.3	24.3	25.2	672410000	753540000	674930000	674870000	14	15	11	140
O60306;H0YH15	O60306	10;4	10;4	10;4	54526000	60385000	56078000	Intron-binding protein aquarius	AQR		2	10	10	10	4	6	6	4	6	6	4	6	6	10	10	10	171.29	1485	1485;646	1	67	0	24.764	3.6	5.5	5.7	95324000	59548000	78040000	66083000	1	3	2	32
O60343;O60343-2;O60343-3;O60343-4;O60343-5;Q5JU47	O60343;O60343-2;O60343-3	12;11;11;5;5;2	12;11;11;5;5;2	12;11;11;5;5;2	121530000	123860000	127080000	TBC1 domain family member 4	TBC1D4	;;	6	12	12	12	5	4	6	5	4	6	5	4	6	10.8	10.8	10.8	146.56	1298	1298;1235;1290;462;515;282	1	77	0	19.097	4.5	3.2	5.5	183480000	104470000	92829000	120580000	2	1	2	27
O60427;O60427-2;F5H8G5;F5H3P6;F5H3U5;H7C2V0	O60427;O60427-2	4;2;1;1;1;1	4;2;1;1;1;1	4;2;1;1;1;1	60072000	69811000	0	Fatty acid desaturase 1	FADS1	;	6	4	4	4	3	3	1	3	3	1	3	3	1	12.8	12.8	12.8	51.964	444	444;360;124;146;192;228	1	33	0	14.179	8.1	8.1	3.8	19048000	64378000	50893000	19473000	3	3	1	24
O60443;O60443-3;H7C3W1;O60443-2;H7C147;H7BZJ0	O60443;O60443-3	12;7;5;4;3;2	12;7;5;4;3;2	12;7;5;4;3;2	162350000	162790000	177320000	Non-syndromic hearing impairment protein 5	DFNA5	;	6	12	12	12	9	9	10	9	9	10	9	9	10	31	31	31	54.554	496	496;332;216;101;192;155	1	110	0	33.086	26.6	24.4	26.6	192130000	229360000	186760000	203970000	6	6	4	54
O60488-2;O60488;D6RF95;H0Y9A0;D6RD96;D6RFW9;D6RDA8	O60488-2;O60488	24;24;8;7;6;5;5	22;22;8;7;6;5;5	22;22;8;7;6;5;5	531130000	523090000	440800000	Long-chain-fatty-acid--CoA ligase 4	ACSL4	;	7	24	22	22	14	17	17	12	15	15	12	15	15	46.1	41.8	41.8	74.435	670	670;711;154;156;145;126;128	1	203	0	90.033	27.9	33	34.3	566080000	463260000	616600000	504010000	8	9	10	103
O60493;O60493-2;O60493-4;O60493-3	O60493;O60493-2;O60493-4	9;8;7;4	9;8;7;4	9;8;7;4	727120000	710620000	825470000	Sorting nexin-3	SNX3	;;	4	9	9	9	8	8	7	8	8	7	8	8	7	69.8	69.8	69.8	18.762	162	162;130;140;113	1	116	0	31.195	61.7	49.4	41.4	747420000	788700000	771380000	774300000	5	7	6	74
O60502-4;O60502;O60502-2;O60502-3;H7C3X0;B4DYV7	O60502-4;O60502;O60502-2;O60502-3	16;16;15;11;7;3	16;16;15;11;7;3	16;16;15;11;7;3	192910000	201020000	198700000	Protein O-GlcNAcase	MGEA5	;;;	6	16	16	16	9	8	7	9	8	7	9	8	7	25.6	25.6	25.6	96.931	863	863;916;849;677;256;151	1	117	0	24.451	12.3	11.9	9.7	201920000	216880000	209090000	130960000	3	2	2	36
O60506;O60506-2;O60506-3;O60506-4;O60506-5;F6UXX1	O60506;O60506-2;O60506-3;O60506-4;O60506-5	27;26;25;24;17;9	27;26;25;24;17;9	21;20;20;19;14;7	3924400000	3843600000	4182800000	Heterogeneous nuclear ribonucleoprotein Q	SYNCRIP	;;;;	6	27	27	21	23	22	24	23	22	24	17	17	18	48.2	48.2	38.7	69.602	623	623;588;562;527;410;185	1	471	0	300.44	42.5	37.4	42.7	3728400000	4264900000	4098100000	4517800000	28	21	29	329
O60518	O60518	13	11	11	65369000	117380000	98124000	Ran-binding protein 6	RANBP6		1	13	11	11	10	9	5	9	7	3	9	7	3	15	13.3	13.3	124.71	1105	1105	1	74	0	47.036	11.7	9.9	5.2	50289000	119270000	120060000	62463000	4	3	2	29
O60547;O60547-2	O60547;O60547-2	7;6	7;6	7;6	167220000	158720000	141570000	GDP-mannose 4,6 dehydratase	GMDS	;	2	7	7	7	5	6	6	5	6	6	5	6	6	23.7	23.7	23.7	41.949	372	372;342	1	103	0	20.818	19.1	21.5	21.5	196680000	157200000	176670000	174590000	3	4	2	46
O60563;O60563-2	O60563	5;1	5;1	5;1	32245000	31176000	0	Cyclin-T1	CCNT1		2	5	5	5	3	4	4	3	4	4	3	4	4	7.9	7.9	7.9	80.684	726	726;184	1	42	0	4.5107	4.5	6.7	6.6	23294000	29409000	26311000	100430000	1	2	1	10
O60566;O60566-3;O60566-2	O60566;O60566-3;O60566-2	4;4;2	4;4;2	4;4;2	0	25515000	0	Mitotic checkpoint serine/threonine-protein kinase BUB1 beta	BUB1B	;;	3	4	4	4	1	3	1	1	3	1	1	3	1	4.8	4.8	4.8	119.54	1050	1050;1064;933	1	16	0	5.5804	0.7	4.1	0.7	266870000	3550400	20163000	9466000	0	3	0	9
O60568;H7C2V1;H7C2S8;H7C0B8;C9JU11;C9JIX5;H7C2A8	O60568	29;11;9;4;2;1;1	29;11;9;4;2;1;1	29;11;9;4;2;1;1	1260700000	1215700000	1215600000	Procollagen-lysine,2-oxoglutarate 5-dioxygenase 3	PLOD3		7	29	29	29	25	23	26	25	23	26	25	23	26	52	52	52	84.784	738	738;270;264;66;171;75;125	1	423	0	133.5	44.3	38.9	43.1	1093000000	1456400000	1340600000	1132300000	24	20	20	246
O60573;C9JEL3;B9A044;B8ZZ50;O60573-2;B8ZZL3;B4E1E4;B9A023	O60573;C9JEL3;B9A044;B8ZZ50;O60573-2;B8ZZL3	6;5;5;5;5;3;2;2	6;5;5;5;5;3;2;2	6;5;5;5;5;3;2;2	81401000	138980000	95580000	Eukaryotic translation initiation factor 4E type 2	EIF4E2	;;;;;	8	6	6	6	4	5	4	4	5	4	4	5	4	35.5	35.5	35.5	28.362	245	245;213;233;236;234;200;188;189	1	56	0	13.924	26.1	31.4	22.9	111270000	95732000	153690000	90394000	1	2	2	18
O60637-3;O60637;H0YKJ9;O60637-2;H0YMH8	O60637-3;O60637;H0YKJ9;O60637-2	4;4;2;2;1	4;4;2;2;1	4;4;2;2;1	220170000	251840000	235330000	Tetraspanin-3	TSPAN3	;;;	5	4	4	4	4	3	3	4	3	3	4	3	3	16.9	16.9	16.9	21.183	189	189;253;164;228;45	1	43	0	5.3646	16.9	8.5	8.5	295970000	306650000	282670000	302030000	2	2	2	22
O60645-2;O60645-3;O60645;D6RB59;H0Y995;D6RBR9	O60645-2;O60645-3;O60645;D6RB59	13;13;13;9;4;2	13;13;13;9;4;2	13;13;13;9;4;2	185250000	148460000	151150000	Exocyst complex component 3	EXOC3	;;;	6	13	13	13	10	10	8	10	10	8	10	10	8	26.2	26.2	26.2	73.796	641	641;745;756;462;473;68	1	114	0	48.575	20.4	19.7	15	118950000	180040000	173150000	171120000	2	4	2	35
O60664-4;O60664;O60664-3;K7ERZ3;O60664-2;K7EL96;K7ER39	O60664-4;O60664;O60664-3;K7ERZ3;O60664-2	23;23;21;15;12;10;7	23;23;21;15;12;10;7	23;23;21;15;12;10;7	3053600000	3052100000	3078900000	Perilipin-3	PLIN3	;;;;	7	23	23	23	21	21	20	21	21	20	21	21	20	69.2	69.2	69.2	45.803	422	422;434;433;292;251;172;168	1	422	0	323.31	67.5	62.3	62.3	2687100000	3711200000	3249600000	3289700000	22	24	18	254
O60671-2;O60671;D6R9A1;O60671-3	O60671-2;O60671	4;4;1;1	4;4;1;1	4;4;1;1	45358000	42346000	48043000	Cell cycle checkpoint protein RAD1	RAD1	;	4	4	4	4	3	3	3	3	3	3	3	3	3	24	24	24	27.827	246	246;282;84;68	1	29	0	23.946	17.5	19.9	17.5	20620000	50780000	48067000	52052000	1	3	1	16
O60701;O60701-2;O60701-3;E7ER83;E7ETF4;E7EV97;E7ER95;D6RHF4;E9PBD2	O60701;O60701-2;O60701-3	23;20;19;5;5;5;3;1;1	23;20;19;5;5;5;3;1;1	23;20;19;5;5;5;3;1;1	2944900000	3081800000	3083600000	UDP-glucose 6-dehydrogenase	UGDH	;;	9	23	23	23	22	21	22	22	21	22	22	21	22	55.9	55.9	55.9	55.023	494	494;427;397;130;153;181;84;53;55	1	340	0	323.31	54.5	53.6	55.7	3150600000	3329100000	3384000000	3304000000	25	21	23	262
O60739	O60739	7	2	2	17243000	22718000	0	Eukaryotic translation initiation factor 1b	EIF1B		1	7	2	2	6	6	6	1	1	1	1	1	1	76.1	26.5	26.5	12.823	113	113	1	22	0	12.847	61.1	61.1	61.1	12849000	16619000	26148000	23922000	1	1	1	7
O60749;O60749-2;D6RC15	O60749;O60749-2	13;12;3	11;10;3	11;10;3	480830000	546640000	562690000	Sorting nexin-2	SNX2	;	3	13	11	11	12	10	11	10	9	9	10	9	9	29.5	25.4	25.4	58.47	519	519;402;265	1	146	0	65.592	27.6	22.5	25	497960000	567510000	596960000	556960000	7	9	8	78
O60784;E7EPD0;O60784-2;O60784-4;O60784-3;B0QY01;B3KUU1;V9GYF4;B0QY02;V9GZ68;H7BYN7;F8WB30;F8WAW7;F8WE29;F8WBB0	O60784;E7EPD0;O60784-2;O60784-4;O60784-3	15;14;14;13;12;7;6;5;5;3;3;1;1;1;1	15;14;14;13;12;7;6;5;5;3;3;1;1;1;1	15;14;14;13;12;7;6;5;5;3;3;1;1;1;1	331640000	291370000	284040000	Target of Myb protein 1	TOM1	;;;;	15	15	15	15	10	8	9	10	8	9	10	8	9	44.5	44.5	44.5	53.818	492	492;454;493;460;447;334;265;134;151;125;133;25;69;83;97	1	126	0	98.858	29.5	22.6	27.4	319840000	347050000	334560000	238650000	8	4	5	72
O60826	O60826	13	13	13	112910000	109730000	121830000	Coiled-coil domain-containing protein 22	CCDC22		1	13	13	13	9	8	8	9	8	8	9	8	8	31.9	31.9	31.9	70.755	627	627	1	113	0	53.202	21.4	18.2	19.8	109990000	130270000	130120000	123970000	4	3	2	52
O60828-2;O60828;O60828-5;O60828-4;H7C053;C9JQA1;O60828-6;O60828-3;O60828-10;O60828-9;O60828-8;O60828-7	O60828-2;O60828;O60828-5;O60828-4;H7C053;C9JQA1;O60828-6;O60828-3	4;4;3;3;2;2;2;2;1;1;1;1	4;4;3;3;2;2;2;2;1;1;1;1	4;4;3;3;2;2;2;2;1;1;1;1	75219000	121860000	91600000	Polyglutamine-binding protein 1	PQBP1	;;;;;;;	12	4	4	4	3	2	2	3	2	2	3	2	2	20.5	20.5	20.5	30.401	264	264;265;165;170;150;213;149;224;60;67;73;128	1	28	0	11.38	15.9	9.1	10.2	115260000	89836000	114230000	82919000	1	2	1	18
O60832;H7BZF2;H7C0M1;C9IYT0;O60832-2	O60832;H7BZF2;H7C0M1;C9IYT0;O60832-2	3;2;2;2;2	3;2;2;2;2	3;2;2;2;2	33235000	32429000	0	H/ACA ribonucleoprotein complex subunit 4	DKC1	;;;;	5	3	3	3	2	3	2	2	3	2	2	3	2	9.9	9.9	9.9	57.673	514	514;76;229;258;420	1	24	0	4.8794	6.4	9.9	6.4	28404000	28585000	53953000	33548000	1	0	0	9
O60841	O60841	38	38	38	1338400000	1332800000	1525600000	Eukaryotic translation initiation factor 5B	EIF5B		1	38	38	38	27	30	26	27	30	26	27	30	26	37.7	37.7	37.7	138.83	1220	1220	1	400	0	174.34	30.4	33	28	1405200000	1355000000	1409000000	1537300000	17	14	17	201
O60869-2;O60869-3;O60869	O60869-2;O60869-3;O60869	10;10;10	10;10;10	10;10;10	963740000	965050000	1034400000	Endothelial differentiation-related factor 1	EDF1	;;	3	10	10	10	9	9	9	9	9	9	9	9	9	59.7	59.7	59.7	15.48	139	139;141;148	1	156	0	36.612	54.7	54.7	53.2	1052300000	977090000	957360000	1266100000	9	8	10	113
O60884;I3L320;H3BMW5	O60884	12;2;1	12;2;1	12;2;1	434520000	472410000	401100000	DnaJ homolog subfamily A member 2	DNAJA2		3	12	12	12	11	11	9	11	11	9	11	11	9	36.7	36.7	36.7	45.745	412	412;47;134	1	131	0	46.444	33.3	33.3	24.8	451580000	564970000	577250000	335180000	4	7	2	61
O60885;M0QZD9;O60885-2;O60885-3	O60885	5;2;2;2	5;2;2;2	3;0;0;0	0	0	36901000	Bromodomain-containing protein 4	BRD4		4	5	5	3	3	4	4	3	4	4	2	3	3	3.8	3.8	2.5	152.22	1362	1362;572;722;794	1	45	0.00026151	3.2552	2.1	3.2	3.2	42623000	29861000	40407000	33317000	0	0	1	8
O60888-3;O60888;O60888-2;C9IZG4;C9IZQ5	O60888-3;O60888;O60888-2;C9IZG4	5;5;5;3;1	5;5;5;3;1	5;5;5;3;1	460300000	464680000	517480000	Protein CutA	CUTA	;;;	5	5	5	5	3	4	4	3	4	4	3	4	4	55.8	55.8	55.8	16.832	156	156;179;198;135;155	1	71	0	158.79	29.5	46.8	46.8	337540000	475370000	780320000	469210000	8	6	6	76
O60925;E5RGS4;D6RGG5	O60925;E5RGS4	8;7;1	8;7;1	8;7;1	664650000	642020000	533520000	Prefoldin subunit 1	PFDN1	;	3	8	8	8	8	7	7	8	7	7	8	7	7	68	68	68	14.21	122	122;117;35	1	125	0	59.954	68	62.3	62.3	687630000	881590000	595290000	651050000	8	5	5	69
O60927	O60927	3	3	3	28711000	0	0	Protein phosphatase 1 regulatory subunit 11	PPP1R11		1	3	3	3	2	2	1	2	2	1	2	2	1	32.5	32.5	32.5	13.952	126	126	1	17	0	26.074	32.5	12.7	12.7	26697000	32792000	23296000	24302000	1	2	1	12
O75044;H0Y4C3;H0Y2P8;Q5VZB4;P0DJJ0;H0Y582;E9PDX4	O75044;H0Y4C3;H0Y2P8;Q5VZB4	8;7;7;4;3;1;1	8;7;7;4;3;1;1	7;6;6;3;3;1;1	49136000	51499000	41060000	SLIT-ROBO Rho GTPase-activating protein 2	SRGAP2	;;;	7	8	8	7	4	5	4	4	5	4	3	4	3	10.5	10.5	9.3	120.88	1071	1071;931;985;450;459;230;252	1	48	0	15.884	6.8	5.7	4.9	67434000	55497000	74890000	51995000	1	2	2	19
O75083;O75083-3;D6RD66	O75083;O75083-3	33;20;16	33;20;16	33;20;16	5559700000	5113500000	5306600000	WD repeat-containing protein 1	WDR1	;	3	33	33	33	30	28	30	30	28	30	30	28	30	68.6	68.6	68.6	66.193	606	606;466;245	1	622	0	323.31	67	67.2	67.3	5131800000	5644400000	5706100000	5435400000	39	40	40	453
O75116;E9PF63;D6REE7;C9JFJ0	O75116;E9PF63	28;26;3;1	28;26;3;1	26;24;3;1	513950000	447770000	438660000	Rho-associated protein kinase 2	ROCK2	;	4	28	28	26	18	18	21	18	18	21	16	17	20	24.7	24.7	23	160.9	1388	1388;1145;446;203	1	250	0	146.65	15.3	16	17.6	464980000	469010000	410040000	546690000	9	12	11	124
O75131;E5RG68;H0YB26;E5RHZ0;E5RJ85;E5RG97;E5RFT7;Q7Z6C8;Q8IYJ1;Q96A23;O95741;Q9UBL6-2;Q96A23-2;Q9HCH3;O95741-2;Q9UBL6	O75131;E5RG68;H0YB26	14;9;7;6;5;3;2;1;1;1;1;1;1;1;1;1	14;9;7;6;5;3;2;1;1;1;1;1;1;1;1;1	13;9;7;6;5;3;2;0;0;0;0;0;0;0;0;0	419410000	438910000	439990000	Copine-3	CPNE3	;;	16	14	14	13	12	7	9	12	7	9	11	6	8	34.1	34.1	32.4	60.13	537	537;234;262;153;139;135;79;301;553;557;557;558;575;593;612;633	1	131	0	29.923	27.4	14.7	23.1	232030000	466790000	338410000	339310000	7	5	6	69
O75146;O75146-2;H0YH66	O75146;O75146-2	12;6;2	12;6;2	12;6;2	120920000	103940000	128780000	Huntingtin-interacting protein 1-related protein	HIP1R	;	3	12	12	12	9	11	9	9	11	9	9	11	9	14.5	14.5	14.5	119.39	1068	1068;615;197	1	105	0	21.846	11.4	13.7	10.9	129150000	130900000	174340000	126780000	1	2	4	29
O75165;H0Y8Q2	O75165	12;4	12;4	12;4	64053000	58830000	84251000	DnaJ homolog subfamily C member 13	DNAJC13		2	12	12	12	8	5	6	8	5	6	8	5	6	7.2	7.2	7.2	254.41	2243	2243;173	1	90	0	16.796	4.8	3.1	3.6	61144000	70379000	54786000	73474000	2	2	1	28
O75170-6;O75170-2;O75170-4;O75170-3;O75170-5;O75170;T1ECW5	O75170-6;O75170-2;O75170-4;O75170-3;O75170-5;O75170;T1ECW5	2;2;2;2;2;2;1	2;2;2;2;2;2;1	2;2;2;2;2;2;1	127910000	117620000	145560000	Serine/threonine-protein phosphatase 6 regulatory subunit 2	PPP6R2	;;;;;;	7	2	2	2	1	1	1	1	1	1	1	1	1	2.2	2.2	2.2	98.125	905	905;927;932;933;959;966;685	1	34	0	5.9749	1.4	1.4	1.4	19837000	25147000	23715000	27234000	2	1	2	21
O75223;M0QZK8;B8ZZK2;O75223-3;O75223-2;O75223-4;H7BZK5	O75223;M0QZK8;B8ZZK2;O75223-3	9;5;5;5;4;4;3	9;5;5;5;4;4;3	9;5;5;5;4;4;3	261640000	271570000	226290000	Gamma-glutamylcyclotransferase	GGCT	;;;	7	9	9	9	8	6	8	8	6	8	8	6	8	66	66	66	21.007	188	188;103;166;94;114;166;119	1	89	0	35.366	60.1	34	52.1	229140000	304800000	272230000	225150000	6	4	4	57
O75306-2;O75306;B7Z9L2	O75306-2;O75306;B7Z9L2	11;11;7	11;11;7	11;11;7	233280000	259360000	205600000	NADH dehydrogenase [ubiquinone] iron-sulfur protein 2, mitochondrial	NDUFS2	;;	3	11	11	11	8	9	10	8	9	10	8	9	10	30	30	30	51.851	457	457;463;231	1	117	0	35.373	19.5	23	25.8	190650000	189410000	259170000	246710000	3	4	4	42
O75323;O75323-2;C9K068;F8WBI5;C9J7B1;H7C333	O75323;O75323-2;C9K068	5;4;3;2;1;1	4;3;3;1;1;1	4;3;3;1;1;1	0	0	34946000	Protein NipSnap homolog 2	GBAS	;;	6	5	4	4	2	0	4	1	0	3	1	0	3	20.6	17.8	17.8	33.742	286	286;247;80;145;65;114	1	31	0	11.599	8.7	0	14.7	60922000	14619000	0	31027000	1	0	2	9
O75340;O75340-2;H0Y9X3;E7EPW6;O75340-3;D6RA21;Q86W51	O75340;O75340-2	9;8;3;2;2;1;1	9;8;3;2;2;1;1	9;8;3;2;2;1;1	1338800000	1408300000	1324800000	Programmed cell death protein 6	PDCD6	;	7	9	9	9	7	8	7	7	8	7	7	8	7	70.2	70.2	70.2	21.868	191	191;189;104;73;69;39;55	1	113	0	89.184	47.1	61.3	47.1	1157600000	1411200000	1630900000	1363000000	5	5	7	75
O75348;F2Z307;O95670-2;O95670	O75348	6;1;1;1	6;1;1;1	6;1;1;1	129170000	120590000	155700000	V-type proton ATPase subunit G 1	ATP6V1G1		4	6	6	6	4	6	4	4	6	4	4	6	4	48.3	48.3	48.3	13.757	118	118;99;78;118	1	54	0	72.158	36.4	48.3	28.8	154210000	137270000	163120000	120690000	2	2	2	17
O75351;Q6PIW4-2;Q6PIW4	O75351	13;1;1	13;1;1	10;0;0	290980000	270420000	256100000	Vacuolar protein sorting-associated protein 4B	VPS4B		3	13	13	10	11	8	9	11	8	9	9	6	6	39	39	32.4	49.301	444	444;563;674	1	137	0	27.124	31.3	22.7	25.5	285810000	291210000	277180000	264130000	7	4	5	51
O75368	O75368	8	8	8	590330000	609860000	591490000	SH3 domain-binding glutamic acid-rich-like protein	SH3BGRL		1	8	8	8	5	8	5	5	8	5	5	8	5	78.1	78.1	78.1	12.774	114	114	1	103	0	20.953	62.3	78.1	62.3	586020000	594700000	785490000	607820000	6	7	6	69
O75369-8;O75369-2;O75369-9;O75369;O75369-6;O75369-3;E7EN95;O75369-7;O75369-5;O75369-4;H7C5L4;Q8WXT3	O75369-8;O75369-2;O75369-9;O75369;O75369-6;O75369-3;E7EN95;O75369-7;O75369-5;O75369-4	152;150;150;150;147;147;137;137;121;121;6;2	152;150;150;150;147;147;137;137;121;121;6;2	138;136;136;136;133;133;131;131;109;109;5;2	29057000000	30082000000	30733000000	Filamin-B	FLNB	;;;;;;;;;	12	152	152	138	140	142	141	140	142	141	126	129	127	77.2	77.2	73	281.63	2633	2633;2578;2591;2602;2537;2561;2409;2422;2146;2150;135;72	1	2741	0	323.31	70.5	73.1	72.4	29518000000	32402000000	32563000000	32039000000	175	170	167	1986
O75396	O75396	12	12	12	2480000000	2487200000	2534900000	Vesicle-trafficking protein SEC22b	SEC22B		1	12	12	12	12	11	10	12	11	10	12	11	10	51.6	51.6	51.6	24.593	215	215	1	243	0	323.31	51.6	51.6	48.8	2557000000	2802200000	2409400000	2694200000	12	12	14	137
O75400-2;O75400-3;O75400;F5H578;H0YG38;H7C2N3	O75400-2;O75400-3;O75400	12;12;12;4;2;1	12;12;12;4;2;1	12;12;12;4;2;1	245350000	279690000	323580000	Pre-mRNA-processing factor 40 homolog A	PRPF40A	;;	6	12	12	12	11	11	10	11	11	10	11	11	10	15.2	15.2	15.2	105.93	930	930;939;957;448;346;163	1	147	0	31.231	14.1	14.4	12.4	273680000	310680000	300630000	271380000	6	3	3	48
O75436;F5H4L7;S4R3Q6;O75436-2;G3V1N8;S4R2Y3	O75436;F5H4L7;S4R3Q6;O75436-2;G3V1N8	16;15;12;12;9;1	16;15;12;12;9;1	14;13;11;11;7;1	1145300000	1068400000	1120500000	Vacuolar protein sorting-associated protein 26A	VPS26A	;;;;	6	16	16	14	13	16	16	13	16	16	12	14	14	56.9	56.9	52.6	38.169	327	327;310;226;251;216;63	1	238	0	167.97	47.7	56.9	56.9	1097400000	1169800000	1302700000	1292000000	11	11	12	130
O75439;G3V0E4;E7ERZ4;F8WAZ6;F8WEA6;F8WBE1	O75439;G3V0E4;E7ERZ4	16;14;11;7;3;3	16;14;11;7;3;3	16;14;11;7;3;3	680150000	687060000	647730000	Mitochondrial-processing peptidase subunit beta	PMPCB	;;	6	16	16	16	16	15	15	16	15	15	16	15	15	42.9	42.9	42.9	54.366	489	489;490;403;202;119;122	1	243	0	142.62	42.9	41.5	41.5	681690000	806140000	866220000	744220000	11	15	9	117
O75475;O75475-3;O75475-2	O75475;O75475-3;O75475-2	10;9;9	9;8;8	9;8;8	281340000	234320000	260700000	PC4 and SFRS1-interacting protein	PSIP1	;;	3	10	9	9	10	9	10	9	8	9	9	8	9	20.8	19.2	19.2	60.103	530	530;329;333	1	108	0	20.138	20.8	19.4	20.8	237680000	348500000	272490000	358960000	5	5	3	58
O75477;B0QZ43	O75477;B0QZ43	10;7	7;4	7;4	114680000	140740000	107240000	Erlin-1	ERLIN1	;	2	10	7	7	9	8	9	6	5	6	6	5	6	32.9	24	24	38.925	346	346;275	1	57	0	12.351	28.6	25.4	28.9	92164000	185480000	187470000	121960000	4	1	1	19
O75489;E9PS48;B4DFM8;E9PKL8;G3V194;E9PJE7	O75489	10;3;3;2;2;1	10;3;3;2;2;1	10;3;3;2;2;1	301630000	306990000	378940000	NADH dehydrogenase [ubiquinone] iron-sulfur protein 3, mitochondrial	NDUFS3		6	10	10	10	7	6	6	7	6	6	7	6	6	46.2	46.2	46.2	30.241	264	264;161;132;77;121;67	1	104	0	34.929	33.7	25.8	28.8	204000000	323990000	255480000	255050000	3	2	4	49
O75506	O75506	2	2	2	94967000	97484000	0	Heat shock factor-binding protein 1	HSBP1		1	2	2	2	2	2	1	2	2	1	2	2	1	47.4	47.4	47.4	8.5435	76	76	1	19	0	15.668	47.4	47.4	32.9	0	104440000	101730000	61817000	1	1	1	16
O75521-2;O75521;F1LLU7;F8WAW4;C9JB63;F8W6J1;C9J000	O75521-2;O75521;F1LLU7;F8WAW4;C9JB63	7;7;5;4;4;2;2	7;7;5;4;4;2;2	7;7;5;4;4;2;2	204040000	188200000	175270000	Enoyl-CoA delta isomerase 2, mitochondrial	ECI2	;;;;	7	7	7	7	5	5	5	5	5	5	5	5	5	30.1	30.1	30.1	39.609	359	359;394;197;140;220;152;227	1	82	0	25.342	18.4	18.4	18.1	196650000	231360000	200970000	163630000	3	3	2	42
O75530-3;O75530;O75530-2;E9PJK2	O75530-3;O75530;O75530-2	3;3;3;1	3;3;3;1	3;3;3;1	21328000	0	29647000	Polycomb protein EED	EED	;;	4	3	3	3	3	1	2	3	1	2	3	1	2	8.5	8.5	8.5	45.524	400	400;441;466;361	1	21	0	3.7805	8.5	2.8	5.8	1567200	27175000	8955600	26177000	1	0	1	6
O75531	O75531	6	6	6	616220000	617340000	716230000	Barrier-to-autointegration factor;Barrier-to-autointegration factor, N-terminally processed	BANF1		1	6	6	6	5	5	6	5	5	6	5	5	6	66.3	66.3	66.3	10.058	89	89	1	96	0	48.311	64	58.4	66.3	573930000	655420000	527960000	628820000	2	4	3	38
O75533;H7C341;B4DGZ4;O75533-2;F8WC19	O75533	41;6;4;4;1	41;6;4;4;1	41;6;4;4;1	1035300000	945940000	1064400000	Splicing factor 3B subunit 1	SF3B1		5	41	41	41	31	33	31	31	33	31	31	33	31	45.7	45.7	45.7	145.83	1304	1304;241;154;144;37	1	437	0	323.31	31.7	36.4	36.1	943980000	1181800000	961050000	1117400000	26	23	21	258
O75534-2;O75534;O75534-3;O75534-4;E9PLT0;E9PKN4;E9PLD4;E9PNG3	O75534-2;O75534;O75534-3;O75534-4;E9PLT0	18;18;18;18;15;2;2;2	18;18;18;18;15;2;2;2	18;18;18;18;15;2;2;2	318500000	308840000	338280000	Cold shock domain-containing protein E1	CSDE1	;;;;	8	18	18	18	11	14	11	11	14	11	11	14	11	29.2	29.2	29.2	85.746	767	767;798;813;844;668;46;94;136	1	157	0	45.27	18.9	22.8	18.4	330930000	238650000	281200000	287850000	8	6	5	67
O75569-3;O75569-2;O75569;F8WEG8;G5E9Q4;C9JMM3;B4DJC7	O75569-3;O75569-2;O75569;F8WEG8;G5E9Q4;C9JMM3	5;5;5;3;3;3;2	5;5;5;3;3;3;2	5;5;5;3;3;3;2	27845000	0	0	Interferon-inducible double-stranded RNA-dependent protein kinase activator A	PRKRA	;;;;;	7	5	5	5	2	2	2	2	2	2	2	2	2	24.7	24.7	24.7	31.635	288	288;302;313;95;105;108;200	1	25	0	11.78	10.8	7.6	9.4	9388300	29713000	35998000	24944000	1	0	2	13
O75607	O75607	2	2	2	49781000	49489000	53323000	Nucleoplasmin-3	NPM3		1	2	2	2	2	2	2	2	2	2	2	2	2	20.8	20.8	20.8	19.343	178	178	1	22	0	35.796	20.8	20.8	20.8	23056000	54838000	52772000	59717000	1	0	0	7
O75608-2;O75608;E5RGR0;E5RJ48	O75608-2;O75608;E5RGR0	7;7;6;2	7;7;6;2	7;7;6;2	177470000	210400000	167350000	Acyl-protein thioesterase 1	LYPLA1	;;	4	7	7	7	5	6	5	5	6	5	5	6	5	61.2	61.2	61.2	22.875	214	214;230;197;90	1	81	0	82.799	50	54.7	42.5	170520000	133020000	265360000	229600000	5	6	4	46
O75616;J3QT61;J3QSB2;J3QRV9;O75616-2	O75616;J3QT61;J3QSB2;J3QRV9;O75616-2	5;3;3;3;3	5;3;3;3;3	5;3;3;3;3	59642000	69784000	66465000	GTPase Era, mitochondrial	ERAL1	;;;;	5	5	5	5	4	3	4	4	3	4	4	3	4	14.9	14.9	14.9	48.349	437	437;171;276;284;276	1	44	0	9.0922	11.7	7.6	11.7	57912000	76850000	69857000	76446000	2	0	0	14
O75629	O75629	3	3	3	360560000	323360000	307550000	Protein CREG1	CREG1		1	3	3	3	3	3	2	3	3	2	3	3	2	24.5	24.5	24.5	24.074	220	220	1	72	0	127.5	24.5	24.5	15	237810000	404220000	362230000	328130000	3	2	2	35
O75643;C9JAQ9;O75643-2;B4E0P5	O75643	54;16;16;14	54;16;16;14	54;16;16;14	1156400000	1176400000	1246200000	U5 small nuclear ribonucleoprotein 200 kDa helicase	SNRNP200		4	54	54	54	43	44	44	43	44	44	43	44	44	34.5	34.5	34.5	244.5	2136	2136;625;625;595	1	585	0	323.31	28.7	28.6	27.9	1182900000	1386200000	1306500000	1466000000	31	36	31	332
O75663;O75663-2	O75663;O75663-2	14;10	14;10	14;10	307230000	261980000	277140000	TIP41-like protein	TIPRL	;	2	14	14	14	14	11	11	14	11	11	14	11	11	70.2	70.2	70.2	31.444	272	272;178	1	157	0	41.422	70.2	59.9	58.1	177850000	369540000	337070000	273350000	6	3	7	67
O75694;E9PF10;O75694-2;D6RA13	O75694;E9PF10;O75694-2	32;31;31;1	32;31;31;1	32;31;31;1	693150000	733520000	827810000	Nuclear pore complex protein Nup155	NUP155	;;	4	32	32	32	26	26	25	26	26	25	26	26	25	33.9	33.9	33.9	155.2	1391	1391;1327;1332;54	1	362	0	252.44	27.5	27.5	26.6	757240000	786040000	876430000	927940000	13	17	19	168
O75717-2;O75717;F8W7P7;C9JYB3	O75717-2;O75717;F8W7P7	5;5;4;1	5;5;4;1	5;5;4;1	42336000	40261000	35752000	WD repeat and HMG-box DNA-binding protein 1	WDHD1	;;	4	5	5	5	4	4	5	4	4	5	4	4	5	6.3	6.3	6.3	112.7	1006	1006;1129;647;168	1	54	0	7.0001	4.9	5.4	6.3	37997000	49661000	38011000	52186000	2	1	1	16
O75718;C9JP16	O75718;C9JP16	15;13	15;13	15;13	607720000	744510000	713970000	Cartilage-associated protein	CRTAP	;	2	15	15	15	12	13	13	12	13	13	12	13	13	43.9	43.9	43.9	46.561	401	401;358	1	183	0	70.411	34.9	38.9	38.9	760370000	756710000	813690000	789490000	10	9	9	98
O75746;O75746-2;F8W9J0;H0YFB2;B4DGK6	O75746;O75746-2	14;11;3;3;3	10;7;3;3;3	10;7;3;3;3	106180000	93017000	109880000	Calcium-binding mitochondrial carrier protein Aralar1	SLC25A12	;	5	14	10	10	13	6	6	9	4	4	9	4	4	27.6	21.2	21.2	74.761	678	678;571;87;175;210	1	92	0	21.948	25.1	12.4	11.5	67443000	154410000	56085000	69249000	5	3	2	40
O75792	O75792	5	5	5	51781000	59512000	64737000	Ribonuclease H2 subunit A	RNASEH2A		1	5	5	5	5	4	2	5	4	2	5	4	2	22.4	22.4	22.4	33.395	299	299	1	47	0	4.483	22.4	17.1	10	45289000	65891000	65455000	35462000	1	1	1	7
O75815;O75815-3;O75815-2	O75815;O75815-3;O75815-2	4;3;2	4;3;2	4;3;2	21011000	0	0	Breast cancer anti-estrogen resistance protein 3	BCAR3	;;	3	4	4	4	2	2	0	2	2	0	2	2	0	6.3	6.3	6.3	92.565	825	825;734;501	1	21	0.0024679	2.5436	2.2	3.6	0	35144000	19078000	22666000	0	2	0	0	6
O75818-2;O75818;X6RLL4;F8WC38	O75818-2;O75818;X6RLL4	3;3;2;1	3;3;2;1	3;3;2;1	32561000	21768000	0	Ribonuclease P protein subunit p40	RPP40	;;	4	3	3	3	3	3	3	3	3	3	3	3	3	10.6	10.6	10.6	39.327	340	340;363;303;113	1	25	0	6.5872	10.6	10.6	10.6	22362000	42825000	21329000	15234000	1	1	1	11
O75821;K7EL20;K7ENA8;K7EP16	O75821;K7EL20;K7ENA8	15;12;12;7	15;12;12;7	6;3;6;3	984340000	922800000	1022800000	Eukaryotic translation initiation factor 3 subunit G	EIF3G	;;	4	15	15	6	12	12	14	12	12	14	5	5	6	49.7	49.7	21.9	35.611	320	320;262;289;118	1	190	0	117.62	44.1	41.2	46.9	1044600000	1086700000	1230500000	1213700000	13	9	12	130
O75822;O75822-3;O75822-2;H0YLP3;H0YGJ7	O75822;O75822-3;O75822-2	14;12;11;5;4	14;12;11;5;4	14;12;11;5;4	643620000	658220000	652690000	Eukaryotic translation initiation factor 3 subunit J	EIF3J	;;	5	14	14	14	11	12	12	11	12	12	11	12	12	53.5	53.5	53.5	29.062	258	258;209;204;117;106	1	171	0	80.901	41.1	50.8	50.4	739660000	699640000	679960000	753510000	6	8	9	80
O75828	O75828	8	6	6	411840000	408130000	356600000	Carbonyl reductase [NADPH] 3	CBR3		1	8	6	6	7	7	8	5	5	6	5	5	6	36.1	25.6	25.6	30.85	277	277	1	73	0	35.965	29.6	29.6	36.1	370280000	509170000	449850000	427230000	5	1	3	34
O75844	O75844	12	12	12	527670000	515380000	522510000	CAAX prenyl protease 1 homolog	ZMPSTE24		1	12	12	12	10	10	9	10	10	9	10	10	9	30.5	30.5	30.5	54.812	475	475	1	150	0	72.352	22.9	22.9	20.2	481060000	522540000	551510000	566310000	9	5	7	76
O75874;C9J4N6;C9JLU6;C9JJE5	O75874	27;12;7;5	27;12;7;5	27;12;7;5	4616400000	4583000000	4913900000	Isocitrate dehydrogenase [NADP] cytoplasmic	IDH1		4	27	27	27	25	25	24	25	25	24	25	25	24	73.9	73.9	73.9	46.659	414	414;157;73;62	1	457	0	287.77	64.7	60.6	66.2	4647700000	5252200000	5078100000	5315700000	19	28	29	318
O75915;F8WF90;C9JQU6;F8WF33	O75915;F8WF90;C9JQU6;F8WF33	4;2;2;2	4;2;2;2	4;2;2;2	275250000	267450000	273200000	PRA1 family protein 3	ARL6IP5	;;;	4	4	4	4	3	4	4	3	4	4	3	4	4	24.5	24.5	24.5	21.614	188	188;59;88;93	1	68	0	59.166	20.7	24.5	24.5	302040000	269070000	371260000	267860000	4	5	4	50
O75934	O75934	7	7	7	266330000	239170000	247140000	Pre-mRNA-splicing factor SPF27	BCAS2		1	7	7	7	6	5	5	6	5	5	6	5	5	48	48	48	26.131	225	225	1	82	0	34.506	44	35.1	36.9	200710000	301620000	180830000	289480000	3	3	2	39
O75937;S4R3J5	O75937	12;2	12;2	12;2	676920000	814630000	725050000	DnaJ homolog subfamily C member 8	DNAJC8		2	12	12	12	12	10	11	12	10	11	12	10	11	55.7	55.7	55.7	29.841	253	253;106	1	178	0	158.17	55.7	43.9	55.3	913710000	863400000	734920000	846850000	8	8	11	101
O75940	O75940	2	2	2	33850000	0	33092000	Survival of motor neuron-related-splicing factor 30	SMNDC1		1	2	2	2	2	1	2	2	1	2	2	1	2	20.2	20.2	20.2	26.711	238	238	1	21	0.00027137	3.7423	20.2	8.8	20.2	35497000	40038000	19849000	37085000	0	0	1	11
O75947;O75947-2;F5H608	O75947;O75947-2;F5H608	12;10;6	12;10;6	12;10;6	963310000	1030900000	1049800000	ATP synthase subunit d, mitochondrial	ATP5H	;;	3	12	12	12	9	9	10	9	9	10	9	9	10	83.2	83.2	83.2	18.491	161	161;137;81	1	151	0	67.915	68.9	70.8	71.4	944130000	1131800000	910530000	972250000	12	8	8	102
O75955;B4DVY7;A2AB09;A2AB12;A2AB10;A2AB13;A2AB11;A2ABJ5	O75955;B4DVY7;A2AB09;A2AB12;A2AB10	9;8;6;5;5;4;4;1	9;8;6;5;5;4;4;1	9;8;6;5;5;4;4;1	212170000	176080000	196860000	Flotillin-1	FLOT1	;;;;	8	9	9	9	9	9	9	9	9	9	9	9	9	28.3	28.3	28.3	47.355	427	427;379;238;235;252;185;192;145	1	118	0	41.709	28.3	28.3	28.3	200630000	255390000	211770000	215940000	8	3	4	43
O75962-2;O75962;O75962-5;O75962-4;E7EWP2;E7EPJ7;F5H228;O75962-3	O75962-2;O75962;O75962-5;O75962-4;E7EWP2;E7EPJ7;F5H228	8;8;7;7;6;6;4;1	8;8;7;7;6;6;4;1	8;8;7;7;6;6;4;1	115600000	110020000	143510000	Triple functional domain protein	TRIO	;;;;;;	8	8	8	8	7	6	5	7	6	5	7	6	5	3	3	3	329.39	2921	2921;3097;2563;3038;2309;2546;1508;596	1	66	0	11.103	2.7	2.2	1.8	111600000	120610000	114260000	133390000	5	3	2	29
O75964;E9PN17	O75964;E9PN17	6;5	6;5	6;5	740870000	716990000	590600000	ATP synthase subunit g, mitochondrial	ATP5L	;	2	6	6	6	6	5	6	6	5	6	6	5	6	52.4	52.4	52.4	11.428	103	103;76	1	99	0	38.994	52.4	51.5	52.4	539010000	860290000	784870000	666210000	6	6	5	56
O75976-2;O75976;J3QRJ9;J3QQJ4	O75976-2;O75976	4;4;1;1	4;4;1;1	4;4;1;1	20569000	0	0	Carboxypeptidase D	CPD	;	4	4	4	4	4	1	1	4	1	1	4	1	1	4.1	4.1	4.1	126.49	1133	1133;1380;82;184	1	28	0	5.9916	4.1	1	1	11889000	31898000	10454000	10120000	4	0	0	10
O76003	O76003	16	16	16	1447400000	1450800000	1461400000	Glutaredoxin-3	GLRX3		1	16	16	16	14	12	14	14	12	14	14	12	14	54.9	54.9	54.9	37.432	335	335	1	228	0	250.62	51	39.7	46.9	1158100000	1863200000	1340700000	1527400000	11	9	13	135
O76031;H0YM48;H0YK07	O76031	14;3;2	14;3;2	14;3;2	205400000	242090000	216150000	ATP-dependent Clp protease ATP-binding subunit clpX-like, mitochondrial	CLPX		3	14	14	14	10	10	9	10	10	9	10	10	9	33.2	33.2	33.2	69.223	633	633;268;130	1	138	0	30.139	23.1	20.2	17.7	209970000	220780000	203480000	203510000	3	4	5	46
O76070;F8W754	O76070	5;1	5;1	5;1	0	0	89181000	Gamma-synuclein	SNCG		2	5	5	5	2	2	3	2	2	3	2	2	3	42.5	42.5	42.5	13.331	127	127;126	1	40	0	12.382	22.8	22.8	24.4	63746000	40269000	58700000	63254000	1	0	0	7
O76071	O76071	9	9	9	128510000	141290000	146000000	Probable cytosolic iron-sulfur protein assembly protein CIAO1	CIAO1		1	9	9	9	7	6	7	7	6	7	7	6	7	38.6	38.6	38.6	37.84	339	339	1	91	0	17.461	30.7	27.1	30.1	148260000	130210000	139230000	160220000	3	3	3	38
O76094;O76094-2;D6RDY6;R4GNC1	O76094;O76094-2	26;24;12;9	26;24;12;9	26;24;12;9	828570000	882730000	855140000	Signal recognition particle subunit SRP72	SRP72	;	4	26	26	26	22	22	19	22	22	19	22	22	19	51.6	51.6	51.6	74.605	671	671;610;357;220	1	287	0	242.12	42.3	42.8	33.1	927170000	931890000	1032200000	854100000	11	14	9	138
O94760;B4DYP1;B4DGT0;O94760-2	O94760;B4DYP1;B4DGT0;O94760-2	10;6;6;6	10;6;6;6	9;5;5;5	275380000	254150000	252950000	N(G),N(G)-dimethylarginine dimethylaminohydrolase 1	DDAH1	;;;	4	10	10	9	7	7	4	7	7	4	6	6	3	41.1	41.1	38.2	31.121	285	285;185;192;182	1	106	0	20.593	28.1	28.8	15.4	335920000	309930000	190060000	159150000	5	4	4	52
O94766;G3V150;B7ZAB3;E9PNA1;Q9NPZ5	O94766;G3V150;B7ZAB3	5;4;4;2;1	5;4;4;2;1	5;4;4;2;1	66902000	42704000	46714000	Galactosylgalactosylxylosylprotein 3-beta-glucuronosyltransferase 3	B3GAT3	;;	5	5	5	5	3	4	2	3	4	2	3	4	2	21.5	21.5	21.5	37.121	335	335;319;315;223;323	1	32	0	9.809	9	18.8	12.2	41867000	43955000	69853000	47908000	2	2	2	19
O94776;O94776-2	O94776;O94776-2	17;9	17;9	17;9	511610000	436960000	505010000	Metastasis-associated protein MTA2	MTA2	;	2	17	17	17	14	14	15	14	14	15	14	14	15	33.5	33.5	33.5	75.022	668	668;495	1	189	0	58.807	26.9	26.9	29	479890000	520580000	499830000	480330000	9	8	8	101
O94804;H0YB71	O94804	5;2	3;1	3;1	31539000	27661000	0	Serine/threonine-protein kinase 10	STK10		2	5	3	3	5	4	4	3	2	2	3	2	2	5.6	3.5	3.5	112.13	968	968;281	1	28	0	4.6786	5.6	4.8	4.8	23968000	37553000	23752000	11430000	0	1	1	7
O94826	O94826	24	24	24	758120000	756330000	697090000	Mitochondrial import receptor subunit TOM70	TOMM70A		1	24	24	24	19	20	17	19	20	17	19	20	17	56.9	56.9	56.9	67.454	608	608	1	273	0	108.81	48	46.7	36.2	740730000	803010000	777170000	686440000	11	18	10	134
O94855;O94855-2;E9PDM8;E9PC44	O94855;O94855-2;E9PDM8;E9PC44	21;21;18;14	21;21;18;14	21;21;18;14	560660000	595710000	597330000	Protein transport protein Sec24D	SEC24D	;;;	4	21	21	21	16	14	13	16	14	13	16	14	13	27	27	27	113.01	1032	1032;1033;663;393	1	228	0	83.493	23	17.2	15.6	585970000	641090000	546830000	533550000	8	7	3	72
O94874;O94874-2;O94874-3	O94874;O94874-2;O94874-3	17;16;13	17;16;13	17;16;13	163580000	180630000	138300000	E3 UFM1-protein ligase 1	UFL1	;;	3	17	17	17	10	9	9	10	9	9	10	9	9	27.7	27.7	27.7	89.594	794	794;729;509	1	128	0	25.719	15.7	14	14	202160000	164810000	187700000	138360000	4	6	2	49
O94875-7;O94875;O94875-11;H7BXR3;O94875-9;O94875-5;O94875-3;O94875-8;O94875-2;O94875-4;O94875-12;O94875-10;H7C1R7;H7BZK1;H7BZX1;O94875-6	O94875-7;O94875;O94875-11;H7BXR3;O94875-9;O94875-5;O94875-3;O94875-8;O94875-2;O94875-4;O94875-12;O94875-10;H7C1R7	5;5;5;4;4;4;4;4;4;4;4;4;3;2;1;1	5;5;5;4;4;4;4;4;4;4;4;4;3;2;1;1	5;5;5;4;4;4;4;4;4;4;4;4;3;2;1;1	99008000	91848000	87968000	Sorbin and SH3 domain-containing protein 2	SORBS2	;;;;;;;;;;;;	16	5	5	5	2	5	3	2	5	3	2	5	3	6.4	6.4	6.4	113.55	1004	1004;1100;1200;636;644;645;645;661;666;691;731;824;291;291;253;156	1	44	0	6.5784	3.1	6.4	4.2	87411000	73909000	103720000	95265000	2	1	0	11
O94888;F8WB69;C9JAT7;F5GYB1	O94888;F8WB69;C9JAT7;F5GYB1	2;1;1;1	2;1;1;1	2;1;1;1	0	0	45049000	UBX domain-containing protein 7	UBXN7	;;;	4	2	2	2	1	0	2	1	0	2	1	0	2	5.3	5.3	5.3	54.862	489	489;75;327;341	1	16	0.000258	3.0637	2.7	0	5.3	16841000	7701800	0	53839000	0	0	1	5
O94903;E5RFX7;E5RG77;H0YBG2;E5RFZ4	O94903;E5RFX7;E5RG77	5;4;4;2;1	5;4;4;2;1	5;4;4;2;1	68154000	65726000	73064000	Proline synthase co-transcribed bacterial homolog protein	PROSC	;;	5	5	5	5	4	4	3	4	4	3	4	4	3	24.7	24.7	24.7	30.344	275	275;137;152;128;74	1	34	0	11.33	20	21.5	16.7	71251000	82725000	70186000	86098000	2	4	2	25
O94906;O94906-2	O94906;O94906-2	24;23	24;23	24;23	288600000	306790000	330280000	Pre-mRNA-processing factor 6	PRPF6	;	2	24	24	24	18	14	14	18	14	14	18	14	14	27.9	27.9	27.9	106.92	941	941;901	1	183	0	51.209	21.5	16.4	15.4	294610000	401440000	311210000	312410000	3	6	1	44
O94919	O94919	1	1	1	0	0	8665600	Endonuclease domain-containing 1 protein	ENDOD1		1	1	1	1	0	0	1	0	0	1	0	0	1	2.8	2.8	2.8	55.016	500	500	1	2	0.0056312	1.9836	0	0	2.8	0	0	0	8960500	0	0	0	1
O94925-3;B8ZZA8;B8ZZC5	O94925-3	19;5;4	19;5;4	3;3;3	1012600000	1030700000	1006100000	Glutaminase kidney isoform, mitochondrial	GLS		3	19	19	3	14	15	15	14	15	15	2	3	3	43.6	43.6	6.9	65.459	598	598;169;103	1	265	0	193.35	35.1	38.5	39	1034300000	1181800000	1111600000	999100000	16	17	13	159
O94927;O94927-2;U3KQJ5;U3KQG4;K7EQ61	O94927;O94927-2	4;2;1;1;1	4;2;1;1;1	4;2;1;1;1	0	0	14187000	HAUS augmin-like complex subunit 5	HAUS5	;	5	4	4	4	1	3	2	1	3	2	1	3	2	8.1	8.1	8.1	71.682	633	633;290;60;89;168	1	12	0.00025988	3.185	1.7	6.5	3.3	11438000	15102000	9097000	14670000	0	2	0	5
O94973;O94973-2;O94973-3;E9PR62;H0YDE9;H0YEG0;E9PQP4;E9PPY8	O94973;O94973-2;O94973-3	20;20;16;6;4;4;3;2	10;10;6;3;2;2;2;1	10;10;6;3;2;2;2;1	165290000	189330000	199910000	AP-2 complex subunit alpha-2	AP2A2	;;	8	20	10	10	15	18	16	7	9	8	7	9	8	28.6	16.2	16.2	103.96	939	939;940;656;378;184;185;90;138	1	97	0	40.346	22	26.7	24	140440000	197060000	222720000	212510000	5	4	6	52
O94992;Q96MH2	O94992	8;1	8;1	8;1	148860000	133890000	141770000	Protein HEXIM1	HEXIM1		2	8	8	8	6	5	5	6	5	5	6	5	5	32.9	32.9	32.9	40.623	359	359;286	1	69	0	17.558	20.3	18.4	18.4	133640000	147530000	115710000	148970000	2	0	0	23
O95084;B4E2J3;E9PRR2	O95084;B4E2J3	7;6;1	7;6;1	7;6;1	185970000	154040000	167450000	Serine protease 23	PRSS23	;	3	7	7	7	7	6	5	7	6	5	7	6	5	34.7	34.7	34.7	43.001	383	383;351;154	1	75	0	17.009	34.7	28.2	24.8	189850000	197360000	180940000	142070000	7	2	3	35
O95104-2;O95104-3;O95104	O95104-2;O95104-3;O95104	4;4;4	4;4;4	1;1;1	57848000	58652000	64095000	Splicing factor, arginine/serine-rich 15	SCAF4	;;	3	4	4	1	4	3	3	4	3	3	1	1	1	3.5	3.5	1.2	123.64	1125	1125;1132;1147	1	42	0	5.3716	3.5	2.8	2.8	46593000	79413000	46737000	57412000	2	1	1	11
O95140;O95140-2;Q5JXC5	O95140;O95140-2	8;6;1	8;6;1	8;6;1	60611000	60728000	79282000	Mitofusin-2	MFN2	;	3	8	8	8	8	8	6	8	8	6	8	8	6	12.4	12.4	12.4	86.401	757	757;436;98	1	70	0	12.062	12.4	12.4	9.5	75460000	106280000	93079000	84393000	3	1	2	25
O95155-2;O95155;O95155-4;O95155-3;K7EP75;K7ERA7;B1AQ61	O95155-2;O95155;O95155-4;O95155-3	15;15;15;12;4;1;1	15;15;15;12;4;1;1	15;15;15;12;4;1;1	176860000	147290000	178830000	Ubiquitin conjugation factor E4 B	UBE4B	;;;	7	15	15	15	10	10	11	10	10	11	10	10	11	19.7	19.7	19.7	133.27	1173	1173;1302;1353;1061;276;98;100	1	132	0	30.404	13.7	13.5	12.3	171980000	190990000	144120000	215810000	3	3	4	34
O95159;E9PMQ3;E9PQA5;E9PQ47;E9PNY1;H0YCU8;E9PJX1;E9PJ47	O95159;E9PMQ3;E9PQA5;E9PQ47;E9PNY1	4;2;2;2;2;1;1;1	4;2;2;2;2;1;1;1	4;2;2;2;2;1;1;1	0	41647000	0	Zinc finger protein-like 1	ZFPL1	;;;;	8	4	4	4	1	2	1	1	2	1	1	2	1	14.8	14.8	14.8	34.114	310	310;109;172;188;207;53;65;80	1	21	0	3.8217	2.9	8.7	2.9	22884000	25302000	45680000	26891000	1	1	1	14
O95163;F5H2T0;H0YDF3	O95163;F5H2T0	27;23;5	27;23;5	27;23;5	450560000	464380000	523730000	Elongator complex protein 1	IKBKAP	;	3	27	27	27	19	21	22	19	21	22	19	21	22	29.8	29.8	29.8	150.25	1332	1332;983;346	1	252	0	110.02	22	22.6	22.3	412310000	581240000	564230000	619930000	6	10	9	94
O95197-3;O95197-5;O95197-4;O95197-7;O95197-2;O95197;B7Z4M1;F5H617;O95197-6;F5H891;F5GWG7	O95197-3;O95197-5;O95197-4;O95197-7;O95197-2;O95197;B7Z4M1;F5H617;O95197-6	4;3;3;3;3;3;2;2;2;1;1	4;3;3;3;3;3;2;2;2;1;1	4;3;3;3;3;3;2;2;2;1;1	782750000	1006600000	1009900000	Reticulon-3;Reticulon	RTN3	;;;;;;;;	11	4	4	4	4	2	3	4	2	3	4	2	3	39	39	39	25.609	236	236;241;255;920;1013;1032;123;185;214;130;136	1	49	0	30.536	39	21.2	27.5	822550000	896690000	1004600000	1011500000	3	2	1	32
O95202;O95202-2;O95202-3	O95202	16;3;3	16;3;3	16;3;3	420180000	508930000	436790000	LETM1 and EF-hand domain-containing protein 1, mitochondrial	LETM1		3	16	16	16	12	13	14	12	13	14	12	13	14	29	29	29	83.353	739	739;254;294	1	170	0	80.197	24.6	24	26.1	384520000	470970000	574600000	546740000	7	4	5	75
O95218-2;O95218	O95218-2;O95218	7;7	7;7	7;7	122150000	157530000	151240000	Zinc finger Ran-binding domain-containing protein 2	ZRANB2	;	2	7	7	7	7	7	6	7	7	6	7	7	6	24.4	24.4	24.4	36.318	320	320;330	1	107	0	13.091	24.4	24.4	21.9	182760000	137800000	185820000	159750000	4	5	5	50
O95274	O95274	1	1	1	34795000	36706000	38233000	Ly6/PLAUR domain-containing protein 3	LYPD3		1	1	1	1	1	1	1	1	1	1	1	1	1	3.2	3.2	3.2	35.97	346	346	1	22	0.0040767	2.2089	3.2	3.2	3.2	35797000	35753000	37316000	40012000	1	1	1	8
O95292;E5RK64;O95292-2	O95292	11;3;3	10;2;2	10;2;2	746660000	738240000	752790000	Vesicle-associated membrane protein-associated protein B/C	VAPB		3	11	10	10	10	9	7	9	8	6	9	8	6	50.2	50.2	50.2	27.228	243	243;71;99	1	126	0	32.78	42.4	42.4	33.3	704970000	829270000	784100000	740310000	10	9	5	83
O95297-4;O95297-2;O95297;Q9UEL6;O95297-5;O95297-3	O95297-4;O95297-2;O95297	4;4;4;1;1;1	4;4;4;1;1;1	4;4;4;1;1;1	106310000	121630000	127720000	Myelin protein zero-like protein 1	MPZL1	;;	6	4	4	4	3	4	4	3	4	4	3	4	4	33.8	33.8	33.8	15.947	145	145;268;269;183;119;209	1	42	0	10.914	24.8	33.8	33.8	97778000	87965000	185180000	173760000	3	2	2	24
O95302;O95302-3;B7Z230;O95302-2;C9J4P8;Q75LS8	O95302;O95302-3;B7Z230	15;14;11;7;6;1	14;14;11;7;6;1	14;14;11;7;6;1	416050000	410810000	447950000	Peptidyl-prolyl cis-trans isomerase FKBP9	FKBP9	;;	6	15	14	14	14	12	11	13	11	10	13	11	10	38.2	37	37	63.083	570	570;623;432;338;225;142	1	138	0	99.174	34.9	28.8	27.5	417740000	639290000	478340000	434910000	9	8	5	73
O95336;M0R261;M0R1L2;M0R0U3	O95336;M0R261;M0R1L2;M0R0U3	12;9;6;6	12;9;6;6	12;9;6;6	878250000	959220000	994910000	6-phosphogluconolactonase	PGLS	;;;	4	12	12	12	12	11	11	12	11	11	12	11	11	65.5	65.5	65.5	27.547	258	258;216;147;179	1	211	0	59.039	65.5	61.2	61.2	792770000	1094400000	913570000	1037400000	13	11	11	117
O95347;O95347-2;Q5T821	O95347;O95347-2	32;30;5	32;30;5	32;30;5	545320000	488150000	540840000	Structural maintenance of chromosomes protein 2	SMC2	;	3	32	32	32	24	24	21	24	24	21	24	24	21	31.7	31.7	31.7	135.65	1197	1197;1099;145	1	295	0	101.68	23.3	23.5	21.2	509190000	581110000	528210000	498630000	9	9	5	105
O95352;O95352-3;O95352-2;H7C059;C9JFF4;C9J415;H7C369;C9JNU2;C9JKA3;H7C2R3;H7BZ92;C9JE55;H7C2J8	O95352;O95352-3;O95352-2	13;12;12;3;3;2;1;1;1;1;1;1;1	13;12;12;3;3;2;1;1;1;1;1;1;1	13;12;12;3;3;2;1;1;1;1;1;1;1	103590000	125110000	137200000	Ubiquitin-like modifier-activating enzyme ATG7	ATG7	;;	13	13	13	13	9	7	11	9	7	11	9	7	11	25.2	25.2	25.2	77.959	703	703;623;676;105;176;152;77;89;93;95;96;126;139	1	117	0	32.41	17.5	12.5	19.1	128520000	106040000	102520000	170520000	3	3	3	40
O95372;Q5QPQ0;Q5QPQ1;Q5QPQ3;Q5QPQ2;E7EPS4;Q5QPN9;Q5QPN5	O95372;Q5QPQ0;Q5QPQ1;Q5QPQ3;Q5QPQ2	7;5;4;4;4;3;3;2	7;5;4;4;4;3;3;2	7;5;4;4;4;3;3;2	625840000	552330000	636060000	Acyl-protein thioesterase 2	LYPLA2	;;;;	8	7	7	7	7	5	6	7	5	6	7	5	6	48.1	48.1	48.1	24.737	231	231;164;162;180;182;134;137;90	1	120	0	126.63	48.1	33.8	37.2	458720000	590240000	630500000	656480000	5	7	6	68
O95373;E9PLB2;E9PLJ0	O95373	32;3;2	32;3;2	31;3;2	2420300000	2719500000	2665600000	Importin-7	IPO7		3	32	32	31	27	24	25	27	24	25	26	23	24	41.1	41.1	40.2	119.52	1038	1038;130;64	1	473	0	323.31	35.1	27	28.6	2537300000	2610800000	2748700000	2684000000	24	28	27	323
O95376	O95376	5	5	5	0	58414000	71112000	E3 ubiquitin-protein ligase ARIH2	ARIH2		1	5	5	5	3	4	2	3	4	2	3	4	2	15.4	15.4	15.4	57.818	493	493	1	42	0	13.956	8.1	11.6	6.7	8064500	44491000	59644000	75021000	1	2	0	14
O95394;O95394-3;O95394-4;J3KN95;D6RCQ8;D6RF77;D6RIS6;H0Y987;D6RCD1;H0Y8I3;D6RC77	O95394;O95394-3;O95394-4;J3KN95	22;22;21;16;8;7;6;5;4;4;4	22;22;21;16;8;7;6;5;4;4;4	22;22;21;16;8;7;6;5;4;4;4	995100000	1055900000	1090700000	Phosphoacetylglucosamine mutase	PGM3	;;;	11	22	22	22	21	18	22	21	18	22	21	18	22	52.4	52.4	52.4	59.851	542	542;566;570;461;146;156;172;197;71;113;114	1	283	0	119.46	50.7	43.7	52.4	995270000	912650000	999460000	1284600000	14	12	15	157
O95400	O95400	4	4	4	0	144920000	128870000	CD2 antigen cytoplasmic tail-binding protein 2	CD2BP2		1	4	4	4	2	4	4	2	4	4	2	4	4	14.1	14.1	14.1	37.646	341	341	1	36	0	6.9436	7.3	14.1	14.1	111880000	58935000	151150000	143630000	1	2	1	8
O95433;B4DUR9;G3V438;H0YJG7;G3V3W9;H0YJU2;H0YJ63;H0YJG6	O95433;B4DUR9;G3V438	15;11;8;7;5;5;3;3	15;11;8;7;5;5;3;3	15;11;8;7;5;5;3;3	709970000	734500000	751960000	Activator of 90 kDa heat shock protein ATPase homolog 1	AHSA1	;;	8	15	15	15	13	14	12	13	14	12	13	14	12	64.5	64.5	64.5	38.274	338	338;288;203;216;100;133;90;120	1	186	0	115.21	53.8	61.8	50	706190000	759380000	853180000	716610000	15	7	5	107
O95456-2;O95456;F8WBH7	O95456-2;O95456	8;8;2	8;8;2	8;8;2	295760000	349810000	358510000	Proteasome assembly chaperone 1	PSMG1	;	3	8	8	8	7	5	5	7	5	5	7	5	5	46.1	46.1	46.1	30.288	267	267;288;63	1	104	0	28.092	40.8	26.2	26.2	292480000	376800000	365350000	343440000	5	3	3	44
O95466-2;O95466;O95466-3;K7EK60;K7EJE6	O95466-2;O95466;O95466-3;K7EK60	13;12;12;8;6	13;12;12;8;6	13;12;12;8;6	131700000	136180000	155470000	Formin-like protein 1	FMNL1	;;;	5	13	13	13	8	6	7	8	6	7	8	6	7	15.4	15.4	15.4	122.41	1104	1104;1100;1158;682;488	1	77	0	22.29	8.3	6.6	8.1	174860000	144690000	144880000	127510000	3	4	4	29
O95470;H0Y3V8;H7BXL7	O95470	5;2;2	5;2;2	5;2;2	114280000	79275000	88637000	Sphingosine-1-phosphate lyase 1	SGPL1		3	5	5	5	3	4	3	3	4	3	3	4	3	12.5	12.5	12.5	63.523	568	568;135;202	1	50	0	8.3336	5.1	9.5	5.1	134490000	150040000	58453000	131410000	2	0	0	16
O95486;O95486-2	O95486	15;3	15;3	14;3	277470000	287310000	284140000	Protein transport protein Sec24A	SEC24A		2	15	15	14	13	12	11	13	12	11	12	12	10	17.2	17.2	16.5	119.75	1093	1093;613	1	168	0	45.887	14.3	13.9	11.8	247470000	467820000	335100000	296360000	7	4	6	69
O95487-2;O95487;O95487-3	O95487-2;O95487;O95487-3	7;7;7	6;6;6	6;6;6	58367000	41535000	46946000	Protein transport protein Sec24B	SEC24B	;;	3	7	6	6	4	3	6	3	3	5	3	3	5	8	7.4	7.4	133.63	1233	1233;1268;1298	1	51	0	8.8567	3.9	3.2	6	28020000	55065000	33778000	62056000	2	1	3	19
O95544;O95544-2;O95544-3	O95544;O95544-2;O95544-3	3;3;2	3;3;2	3;3;2	0	0	32965000	NAD kinase	NADK	;;	3	3	3	3	2	2	3	2	2	3	2	2	3	9	9	9	49.228	446	446;591;423	1	24	0	4.2554	5.8	5.8	9	36923000	32471000	30230000	46283000	0	0	0	4
O95551;O95551-2;X6R5A3;O95551-3	O95551;O95551-2;X6R5A3;O95551-3	6;6;4;4	6;6;4;4	6;6;4;4	64445000	81241000	74269000	Tyrosyl-DNA phosphodiesterase 2	TDP2	;;;	4	6	6	6	5	5	4	5	5	4	5	5	4	25.4	25.4	25.4	40.929	362	362;392;304;284	1	57	0	30.497	20.2	20.2	17.1	74696000	77281000	95483000	63453000	4	3	3	27
O95571;M0QXB5;M0QY80;M0QX80	O95571;M0QXB5	12;11;3;1	12;11;3;1	12;11;3;1	446320000	357760000	382670000	Persulfide dioxygenase ETHE1, mitochondrial	ETHE1	;	4	12	12	12	11	10	10	11	10	10	11	10	10	74.4	74.4	74.4	27.873	254	254;260;95;51	1	152	0	74.97	70.5	59.1	59.1	294180000	522950000	350880000	335900000	8	8	5	78
O95573;H7BYZ7;H7C260;F5GWH2;F5H062;C9JC11	O95573	32;7;7;5;3;2	32;7;7;5;3;2	30;6;7;5;3;2	2094900000	1874700000	1902000000	Long-chain-fatty-acid--CoA ligase 3	ACSL3		6	32	32	30	28	28	29	28	28	29	26	26	27	58.9	58.9	54.9	80.419	720	720;179;213;141;95;88	1	460	0	300.88	53.3	53.5	54.9	1851900000	2486500000	1830500000	2021100000	20	18	23	252
O95630;C9JK83	O95630;C9JK83	4;2	4;2	4;2	31194000	35831000	38555000	STAM-binding protein	STAMBP	;	2	4	4	4	2	3	2	2	3	2	2	3	2	10.1	10.1	10.1	48.076	424	424;318	1	37	0	8.2457	4.7	8.3	6.6	25856000	27025000	27651000	28425000	2	2	3	30
O95684-2;O95684;O95684-3;Q8N103-3	O95684-2;O95684;O95684-3	4;4;2;1	4;4;2;1	4;4;2;1	39000000	45093000	46270000	FGFR1 oncogene partner	FGFR1OP	;;	4	4	4	4	3	3	2	3	3	2	3	3	2	18.5	18.5	18.5	40.907	379	379;399;149;522	1	37	0	7.0808	15	15	11.1	36903000	37188000	44203000	37442000	0	2	1	13
O95721;C9JAF7	O95721	3;1	3;1	3;1	0	0	40532000	Synaptosomal-associated protein 29	SNAP29		2	3	3	3	2	2	3	2	2	3	2	2	3	12.4	12.4	12.4	28.97	258	258;160	1	19	0.0022239	2.5542	7.8	7.8	12.4	22930000	44556000	30538000	41911000	1	0	0	2
O95747	O95747	18	18	5	927750000	881610000	960550000	Serine/threonine-protein kinase OSR1	OXSR1		1	18	18	5	16	16	13	16	16	13	4	4	2	41.4	41.4	12.1	58.022	527	527	1	212	0	142.87	37	33.8	28.3	857820000	1157500000	1015700000	873890000	8	12	7	123
O95758-1;O95758-6;O95758-2;O95758;O95758-5;O95758-4;O95758-7	O95758-1;O95758-6;O95758-2;O95758;O95758-5;O95758-4;O95758-7	6;6;6;6;6;6;5	3;3;3;3;3;3;3	3;3;3;3;3;3;3	68653000	57610000	77025000	Polypyrimidine tract-binding protein 3	PTBP3	;;;;;;	7	6	3	3	6	6	5	3	3	2	3	3	2	20.3	15.5	15.5	56.501	521	521;524;547;552;555;558;457	1	30	0	29.431	20.3	20.3	16.5	70433000	83632000	71097000	66354000	1	3	1	16
O95777;F2Z2Y6;C9JIZ0;C9JNV3	O95777;F2Z2Y6;C9JIZ0;C9JNV3	7;5;5;4	7;5;5;4	7;5;5;4	97055000	212600000	210730000	U6 snRNA-associated Sm-like protein LSm8	LSM8	;;;	4	7	7	7	6	6	6	6	6	6	6	6	6	99	99	99	10.403	96	96;67;75;77	1	70	0	39.577	88.5	88.5	88.5	202940000	142530000	279680000	201900000	3	2	4	39
O95782-2;O95782;M0R2D9;E9PPZ3;E9PS94;E9PNC4	O95782-2;O95782	36;36;1;1;1;1	36;36;1;1;1;1	26;26;0;0;0;0	1523800000	1449900000	1502600000	AP-2 complex subunit alpha-1	AP2A1	;	6	36	36	26	31	33	28	31	33	28	23	24	20	46.7	46.7	35.4	105.36	955	955;977;57;60;62;125	1	439	0	197.61	42.4	45.1	35.9	1518000000	1611000000	1493300000	1428800000	19	23	22	256
O95786;O95786-2;B3KWW1;A2A376;F5H5W6	O95786;O95786-2;B3KWW1;A2A376;F5H5W6	46;43;42;37;24	46;43;42;37;24	46;43;42;37;24	5167600000	4700400000	4536500000	Probable ATP-dependent RNA helicase DDX58	DDX58	;;;;	5	46	46	46	43	42	41	43	42	41	43	42	41	52	52	52	106.6	925	925;880;854;722;536	1	733	0	323.31	49.8	49.1	46.9	3985400000	5985100000	5228200000	4797600000	36	39	38	451
O95816;B4DXE2;A2A296	O95816;B4DXE2	11;10;5	11;10;5	11;10;5	551710000	587800000	549220000	BAG family molecular chaperone regulator 2	BAG2	;	3	11	11	11	9	11	11	9	11	11	9	11	11	62.6	62.6	62.6	23.772	211	211;178;108	1	138	0	116.63	55	62.6	62.6	564810000	581860000	696700000	659060000	7	9	7	86
O95817;C9JFK9	O95817;C9JFK9	15;11	15;11	15;11	248040000	216070000	202560000	BAG family molecular chaperone regulator 3	BAG3	;	2	15	15	15	10	14	14	10	14	14	10	14	14	36.9	36.9	36.9	61.594	575	575;325	1	148	0	40.437	25.2	34.1	33.2	236100000	216180000	266540000	251610000	7	5	3	57
O95831-3;O95831;O95831-2;E9PMA0;O95831-5;O95831-6;O95831-4	O95831-3;O95831;O95831-2;E9PMA0;O95831-5	20;20;12;11;10;8;8	20;20;12;11;10;8;8	20;20;12;11;10;8;8	1152900000	1067300000	1174300000	Apoptosis-inducing factor 1, mitochondrial	AIFM1	;;;;	7	20	20	20	15	18	18	15	18	18	15	18	18	44.7	44.7	44.7	66.294	609	609;613;326;274;261;237;324	1	242	0	76.386	34.5	39.4	40.2	1025800000	1120400000	1269800000	1333800000	11	14	10	124
O95833;Q5SQ17	O95833;Q5SQ17	8;5	8;5	8;5	168050000	135080000	108590000	Chloride intracellular channel protein 3	CLIC3	;	2	8	8	8	7	6	6	7	6	6	7	6	6	40.7	40.7	40.7	26.648	236	236;167	1	93	0	24.018	35.6	30.5	30.5	100910000	229030000	141440000	115240000	7	4	2	43
O95834;O95834-2;O95834-3;C9JRL6;K7EIK7;K7EKU5;K7EIM1;K7ELI8;K7EQR0;K7ERY9;K7EKG3;K7ERR2;K7EII6;G3V500;G3V3N9;F8W717;Q05BV3-4;O00423;O00423-3	O95834;O95834-2;O95834-3;C9JRL6;K7EIK7	10;10;10;9;9;4;3;3;3;3;3;2;2;1;1;1;1;1;1	10;10;10;9;9;4;3;3;3;3;3;2;2;1;1;1;1;1;1	9;9;9;8;8;3;2;3;2;2;3;1;2;0;0;0;0;0;0	173250000	125540000	117580000	Echinoderm microtubule-associated protein-like 2	EML2	;;;;	19	10	10	9	7	6	6	7	6	6	6	5	6	21	21	19.7	70.678	649	649;796;850;603;773;225;111;121;133;148;223;98;181;285;379;803;622;815;834	1	94	0	34.016	16.3	12	13.1	151880000	209400000	113560000	127330000	5	3	2	35
O95861;O95861-4;O95861-2;A6NF51;F8W1J0;F8VVW8;F8VZG4	O95861;O95861-4;O95861-2;A6NF51	14;13;13;12;6;5;5	14;13;13;12;6;5;5	4;4;4;4;4;4;4	808070000	783240000	754910000	3(2),5-bisphosphate nucleotidase 1	BPNT1	;;;	7	14	14	4	10	13	13	10	13	13	2	3	3	54.2	54.2	14.3	33.392	308	308;272;325;291;170;128;136	1	209	0	80.919	41.2	50.3	50.3	854350000	770150000	826930000	807210000	9	7	11	118
O95864;O95864-4;O95864-2;O95864-3	O95864;O95864-4;O95864-2;O95864-3	7;5;5;4	7;5;5;4	7;5;5;4	106810000	72500000	79701000	Fatty acid desaturase 2	FADS2	;;;	4	7	7	7	5	3	4	5	3	4	5	3	4	20.3	20.3	20.3	52.259	444	444;413;422;386	1	55	0	13.813	14.9	6.1	9.5	126400000	106020000	52853000	90724000	1	0	2	19
O95865;Q5SSV3;Q5SRR8;H0Y7N1	O95865;Q5SSV3;Q5SRR8;H0Y7N1	9;6;6;5	8;5;5;4	8;5;5;4	205530000	0	114840000	N(G),N(G)-dimethylarginine dimethylaminohydrolase 2	DDAH2	;;;	4	9	8	8	8	4	7	7	3	6	7	3	6	42.8	40	40	29.644	285	285;226;236;188	1	70	0	12.972	35.4	17.5	29.8	86462000	192180000	81557000	89157000	2	0	2	17
O95881;V9GY50;V9GYV4	O95881	7;1;1	7;1;1	7;1;1	410540000	473800000	504230000	Thioredoxin domain-containing protein 12	TXNDC12		3	7	7	7	4	5	6	4	5	6	4	5	6	62.8	62.8	62.8	19.206	172	172;55;56	1	98	0	28.24	29.7	53.5	57.6	524090000	429710000	469150000	617720000	3	7	7	60
O96005;F5H8J3;B4DDS3;K7EQQ1;K7EJ16;K7ERL5	O96005;F5H8J3;B4DDS3	17;15;14;5;3;2	17;15;14;5;3;2	17;15;14;5;3;2	449930000	436060000	500630000	Cleft lip and palate transmembrane protein 1	CLPTM1	;;	6	17	17	17	13	10	10	13	10	10	13	10	10	36	36	36	76.096	669	669;655;567;171;152;209	1	150	0	60.748	28.6	19	19.1	560620000	602920000	276100000	443600000	8	5	6	89
O96007	O96007	3	3	3	51122000	45981000	57776000	Molybdopterin synthase catalytic subunit	MOCS2		1	3	3	3	3	3	2	3	3	2	3	3	2	28.2	28.2	28.2	20.944	188	188	1	36	0	11.384	28.2	28.2	18.6	51564000	53247000	42076000	56933000	1	3	2	24
O96008;O96008-2;K7EJ57;K7EKG4	O96008;O96008-2;K7EJ57	9;8;5;4	9;8;5;4	9;8;5;4	572440000	607180000	639000000	Mitochondrial import receptor subunit TOM40 homolog	TOMM40	;;	4	9	9	9	8	9	7	8	9	7	8	9	7	51.8	51.8	51.8	37.893	361	361;329;214;168	1	146	0	60.285	47.6	51.8	38.8	742130000	716610000	827740000	752180000	6	9	9	90
O96011-2;O96011;H7C3V6	O96011-2;O96011;H7C3V6	4;4;3	4;4;3	4;4;3	41103000	35464000	37414000	Peroxisomal membrane protein 11B	PEX11B	;;	3	4	4	4	4	4	3	4	4	3	4	4	3	16.3	16.3	16.3	26.724	245	245;259;81	1	43	0.00026954	3.6475	16.3	16.3	11.8	40362000	50461000	41975000	32465000	2	1	1	14
O96019;O96019-2;H7C5S0;C9JQT2;O94805	O96019;O96019-2;H7C5S0	11;9;7;3;1	11;9;7;3;1	11;9;7;3;1	482030000	349320000	409770000	Actin-like protein 6A	ACTL6A	;;	5	11	11	11	8	11	9	8	11	9	8	11	9	39.6	39.6	39.6	47.46	429	429;387;161;50;426	1	142	0	96.433	29.6	39.6	31.9	481750000	415370000	424220000	406120000	7	7	7	76
P00167-2;P00167;P00167-3;J3KNC7	P00167-2;P00167;P00167-3	5;5;4;1	5;5;4;1	5;5;4;1	347790000	278770000	285570000	Cytochrome b5	CYB5A	;;	4	5	5	5	5	5	5	5	5	5	5	5	5	67.3	67.3	67.3	11.268	98	98;134;124;60	1	99	0	17.954	67.3	67.3	67.3	348580000	377190000	310770000	314250000	5	5	6	64
P00338;P00338-3;P00338-4;P00338-5;P00338-2;F5GXY2;F5GYU2;F5GXH2;F5H5J4;F5H6W8;F5GZQ4;F5H8H6;F5GXC7;F5GWW2;F5GXU1;F5H5G7;F5H155;G3XAP5;F5H245;Q6ZMR3;P07864	P00338;P00338-3;P00338-4;P00338-5;P00338-2	23;23;19;15;15;10;9;8;6;6;4;3;3;3;2;1;1;1;1;1;1	23;23;19;15;15;10;9;8;6;6;4;3;3;3;2;1;1;1;1;1;1	22;22;18;14;14;10;9;8;6;6;4;3;3;3;2;0;0;0;0;0;0	39938000000	37879000000	36417000000	L-lactate dehydrogenase A chain	LDHA	;;;;	21	23	23	22	22	20	21	22	20	21	21	19	20	77.4	77.4	73.8	36.688	332	332;361;274;241;274;156;144;114;89;94;72;42;45;45;46;183;225;241;318;332;332	1	664	0	323.31	71.4	65.1	71.1	34922000000	48144000000	38909000000	35151000000	45	44	47	525
P00367;B4DGN5;B3KV55;P49448	P00367;B4DGN5;B3KV55;P49448	27;22;20;20	27;22;20;20	27;22;20;20	2385700000	2470600000	2330200000	Glutamate dehydrogenase 1, mitochondrial;Glutamate dehydrogenase 2, mitochondrial	GLUD1;GLUD2	;;;	4	27	27	27	24	25	26	24	25	26	24	25	26	56.3	56.3	56.3	61.397	558	558;425;391;558	1	414	0	224.31	52.5	54.5	56.1	2378800000	2425300000	2745600000	2722600000	22	15	21	244
P00374;B4DDD2;B4DM58;C9JJ68;Q86XF0	P00374;B4DDD2;B4DM58	6;5;4;1;1	6;5;4;1;1	6;5;4;1;1	0	0	205210000	Dihydrofolate reductase	DHFR	;;	5	6	6	6	3	2	4	3	2	4	3	2	4	44.4	44.4	44.4	21.452	187	187;135;129;114;187	1	42	0	10.598	26.7	17.1	31	238720000	59862000	25080000	129780000	0	0	2	20
P00387-2;P00387;P00387-3;B1AHF3	P00387-2;P00387;P00387-3;B1AHF3	16;16;16;9	16;16;16;9	16;16;16;9	2737300000	2713400000	2743800000	NADH-cytochrome b5 reductase 3;NADH-cytochrome b5 reductase 3 membrane-bound form;NADH-cytochrome b5 reductase 3 soluble form	CYB5R3	;;;	4	16	16	16	15	14	16	15	14	16	15	14	16	77.1	77.1	77.1	31.76	279	279;301;335;147	1	298	0	168.88	77.1	60.6	77.1	2319400000	3079400000	2724000000	2838100000	18	17	21	233
P00390-2;P00390;P00390-3;P00390-4;P00390-5;H0YBD4;E5RI06;H0YC68	P00390-2;P00390;P00390-3;P00390-4;P00390-5	19;19;18;15;14;9;4;3	19;19;18;15;14;9;4;3	19;19;18;15;14;9;4;3	1325100000	1325600000	1307300000	Glutathione reductase, mitochondrial	GSR	;;;;	8	19	19	19	16	17	16	16	17	16	16	17	16	63.7	63.7	63.7	51.7	479	479;522;493;469;440;300;144;131	1	283	0	191.54	58.9	58.9	56.6	1170900000	1473400000	1479200000	1158200000	12	12	12	156
P00395	P00395	2	2	2	49523000	53711000	50326000	Cytochrome c oxidase subunit 1	MT-CO1		1	2	2	2	2	2	2	2	2	2	2	2	2	7.6	7.6	7.6	57.041	513	513	1	25	0.0017452	2.6264	7.6	7.6	7.6	29496000	40803000	45593000	37544000	1	1	0	9
P00403	P00403	4	4	4	273360000	325720000	329450000	Cytochrome c oxidase subunit 2	MT-CO2		1	4	4	4	4	4	4	4	4	4	4	4	4	24.7	24.7	24.7	25.565	227	227	1	49	0	21.619	24.7	24.7	24.7	283490000	311910000	342460000	352940000	1	3	4	33
P00441;H7BYH4	P00441;H7BYH4	7;6	7;6	7;6	3169700000	2817900000	3272100000	Superoxide dismutase [Cu-Zn]	SOD1	;	2	7	7	7	7	7	7	7	7	7	7	7	7	64.9	64.9	64.9	15.936	154	154;135	1	180	0	156.58	64.9	64.9	64.9	3076000000	3436100000	3091300000	3301400000	14	15	12	168
P00491;G3V5M2;G3V2H3;G3V393	P00491;G3V5M2	19;12;7;3	19;12;7;3	19;12;7;3	3573800000	4337200000	3958600000	Purine nucleoside phosphorylase	PNP	;	4	19	19	19	18	17	17	18	17	17	18	17	17	84.4	84.4	84.4	32.118	289	289;221;93;61	1	357	0	289.54	78.5	74.7	74.7	4115300000	4287900000	4600900000	4398100000	29	23	22	300
P00492;Q9NRG1-2;Q9NRG1	P00492	13;1;1	13;1;1	13;1;1	1427800000	1496000000	1475100000	Hypoxanthine-guanine phosphoribosyltransferase	HPRT1		3	13	13	13	13	13	13	13	13	13	13	13	13	79.4	79.4	79.4	24.579	218	218;190;225	1	190	0	80.95	79.4	79.4	79.4	1509300000	1452600000	1594500000	1607000000	10	10	11	122
P00505;P00505-2	P00505;P00505-2	24;20	24;20	24;20	3819800000	3477900000	3415300000	Aspartate aminotransferase, mitochondrial	GOT2	;	2	24	24	24	23	21	21	23	21	21	23	21	21	64.4	64.4	64.4	47.517	430	430;387	1	353	0	195.93	63.5	57.9	58.8	3518600000	4547200000	3625100000	3310800000	19	14	15	188
P00533;E9PFD7;Q504U8;P00533-4;P00533-3;P00533-2;C9JYS6;J3KTI5;B4DTR1;J3QLU9;P04626-3;P04626-2;P04626-5;P04626-4;P04626	P00533;E9PFD7;Q504U8;P00533-4;P00533-3	31;30;25;18;18;13;5;1;1;1;1;1;1;1;1	31;30;25;18;18;13;5;1;1;1;1;1;1;1;1	29;28;23;18;18;13;5;0;0;0;0;0;0;0;0	1164200000	1175500000	1092900000	Epidermal growth factor receptor;Receptor protein-tyrosine kinase	EGFR	;;;;	15	31	31	29	21	22	26	21	22	26	19	20	24	36.1	36.1	34.2	134.28	1210	1210;1157;1091;628;705;405;128;251;979;1055;569;645;1225;1240;1255	1	385	0	148.17	24.4	24.7	30.2	1129100000	1265400000	1107700000	1097300000	24	16	16	199
P00558;B7Z7A9;E7ERH5	P00558;B7Z7A9;E7ERH5	34;32;21	34;32;21	29;28;18	28094000000	29106000000	29029000000	Phosphoglycerate kinase 1	PGK1	;;	3	34	34	29	33	34	33	33	34	33	28	29	28	80.1	80.1	70.3	44.614	417	417;389;281	1	811	0	323.31	80.1	80.1	78.4	29641000000	32657000000	30837000000	30100000000	60	53	54	639
P00918;E5RID5;E5RK37	P00918;E5RID5;E5RK37	4;2;2	4;2;2	4;2;2	60990000	0	52308000	Carbonic anhydrase 2	CA2	;;	3	4	4	4	3	1	3	3	1	3	3	1	3	21.5	21.5	21.5	29.246	260	260;97;101	1	30	0	7.7114	18.1	6.2	14.2	58386000	44305000	27178000	80298000	3	0	2	13
P00966;Q5T6L5;Q5T6L6	P00966;Q5T6L5;Q5T6L6	4;2;2	4;2;2	4;2;2	0	41487000	51351000	Argininosuccinate synthase	ASS1	;;	3	4	4	4	1	3	2	1	3	2	1	3	2	13.1	13.1	13.1	46.53	412	412;179;198	1	31	0	4.6361	2.2	10.9	5.3	61289000	15347000	47931000	42518000	1	1	2	20
P01024;M0QXZ3;M0QYC8	P01024	15;2;1	15;2;1	12;1;1	165530000	181380000	185140000	Complement C3;Complement C3 beta chain;C3-beta-c;Complement C3 alpha chain;C3a anaphylatoxin;Acylation stimulating protein;Complement C3b alpha chain;Complement C3c alpha chain fragment 1;Complement C3dg fragment;Complement C3g fragment;Complement C3d fragment;Complement C3f fragment;Complement C3c alpha chain fragment 2	C3		3	15	15	12	13	9	8	13	9	8	11	8	7	10.9	10.9	9.1	187.15	1663	1663;100;192	1	113	0	26.297	9.4	7.2	6.1	97343000	217720000	204650000	142550000	5	4	4	39
P01111;G3V4K2;G3V5T7	P01111	6;1;1	6;1;1	1;0;0	411850000	392950000	426870000	GTPase NRas	NRAS		3	6	6	1	6	6	6	6	6	6	1	1	1	44.4	44.4	4.8	21.229	189	189;43;75	1	82	0	31.914	44.4	44.4	44.4	387480000	440440000	453240000	448870000	4	4	3	52
P01137;M0R2S0	P01137;M0R2S0	4;2	4;2	4;2	0	18291000	0	Transforming growth factor beta-1;Latency-associated peptide	TGFB1	;	2	4	4	4	3	3	2	3	3	2	3	3	2	13.8	13.8	13.8	44.341	390	390;120	1	30	0	6.6772	10.5	10.5	6.7	16656000	28722000	18059000	25765000	1	2	0	5
P01891;P30459;P16189;P16190;P30512;P10314	P01891;P30459;P16189;P16190;P30512;P10314	21;12;12;11;11;11	21;12;12;11;11;11	3;0;0;0;0;0	10927000000	10890000000	10954000000	HLA class I histocompatibility antigen, A-68 alpha chain;HLA class I histocompatibility antigen, A-74 alpha chain;HLA class I histocompatibility antigen, A-31 alpha chain;HLA class I histocompatibility antigen, A-33 alpha chain;HLA class I histocompatibility antigen, A-29 alpha chain;HLA class I histocompatibility antigen, A-32 alpha chain	HLA-A	;;;;;	6	21	21	3	20	20	20	20	20	20	3	2	3	54.8	54.8	7.1	40.908	365	365;365;365;365;365;365	1	537	0	323.31	54.8	54.2	53.4	11375000000	10577000000	11691000000	11858000000	33	40	38	439
P02462-2;P02462;P29400;P29400-2	P02462-2;P02462;P29400;P29400-2	2;2;1;1	2;2;1;1	2;2;1;1	96808000	68802000	64406000	Collagen alpha-1(IV) chain;Arresten;Collagen alpha-5(IV) chain	COL4A1;COL4A5	;;;	4	2	2	2	2	2	2	2	2	2	2	2	2	2.2	2.2	2.2	127.98	1318	1318;1669;1685;1691	1	30	0	7.8963	2.2	2.2	2.2	81126000	107060000	78522000	54079000	2	2	1	15
P02545-2;Q5TCI8	P02545-2;Q5TCI8	51;40	1;1	1;1	216220000	177880000	351200000	Prelamin-A/C;Lamin-A/C	LMNA	;	2	51	1	1	50	48	49	1	1	1	1	1	1	77.4	4.5	4.5	65.134	572	572;491	1	48	0	18.906	75.9	72.7	75.9	224200000	233380000	172340000	349690000	3	4	2	37
P02786;G3V0E5;F5H6B1;H7C3V5;F8WBE5	P02786;G3V0E5;F5H6B1	29;26;18;5;3	29;26;18;5;3	29;26;18;5;3	2565100000	2540900000	2532300000	Transferrin receptor protein 1;Transferrin receptor protein 1, serum form	TFRC	;;	5	29	29	29	27	26	27	27	26	27	27	26	27	46.2	46.2	46.2	84.87	760	760;679;478;118;81	1	480	0	248.58	43.2	41.8	43.7	2400700000	2944500000	2805700000	2688500000	29	24	21	299
P02792	P02792	12	12	12	1894500000	1706400000	2142700000	Ferritin light chain	FTL		1	12	12	12	10	11	11	10	11	11	10	11	11	62.9	62.9	62.9	20.019	175	175	1	245	0	47.469	54.9	55.4	55.4	1905600000	1701800000	1828000000	1977400000	11	10	9	122
P02794;G3V192;G3V1D1;E9PRK8;E9PKY7;E9PPQ4;E9PQR3;E9PKM5;E9PK45	P02794;G3V192;G3V1D1	11;9;8;4;4;3;2;2;2	11;9;8;4;4;3;2;2;2	11;9;8;4;4;3;2;2;2	9671400000	10198000000	9765200000	Ferritin heavy chain;Ferritin heavy chain, N-terminally processed;Ferritin	FTH1	;;	9	11	11	11	11	11	11	11	11	11	11	11	11	71.6	71.6	71.6	21.225	183	183;153;113;95;114;58;50;81;102	1	303	0	138.91	71.6	71.6	71.6	9688900000	11228000000	10944000000	9552400000	24	20	17	258
P03905	P03905	1	1	1	21858000	0	0	NADH-ubiquinone oxidoreductase chain 4	MT-ND4		1	1	1	1	1	0	0	1	0	0	1	0	0	3.5	3.5	3.5	51.58	459	459	1	2	0.0084843	1.7549	3.5	0	0	0	23798000	0	0	0	0	0	1
P04040	P04040	17	17	17	523510000	532900000	475760000	Catalase	CAT		1	17	17	17	12	12	13	12	12	13	12	12	13	39.5	39.5	39.5	59.755	527	527	1	165	0	57.711	28.1	27.3	29.6	599470000	651210000	550450000	559690000	6	3	5	65
P04062-4;P04062-2;P04062;F5H241;P04062-5;P04062-3	P04062-4;P04062-2;P04062;F5H241;P04062-5;P04062-3	18;18;18;17;17;11	18;18;18;17;17;11	18;18;18;17;17;11	1562700000	1602900000	1660400000	Glucosylceramidase	GBA	;;;;;	6	18	18	18	17	16	14	17	16	14	17	16	14	54.8	54.8	54.8	50.316	449	449;516;536;423;487;263	1	278	0	161.73	51.9	50.1	45.4	1601700000	1984200000	1762100000	1446100000	19	14	14	187
P04075;P04075-2;J3KPS3;H3BQN4;H3BPS8;H3BUH7;H3BR04;H3BMQ8;H3BU78;H3BR68;Q5T7D5;P05062	P04075;P04075-2;J3KPS3;H3BQN4;H3BPS8	37;36;35;34;22;17;17;16;14;11;1;1	37;36;35;34;22;17;17;16;14;11;1;1	29;28;29;26;15;15;15;14;12;10;0;0	46439000000	46912000000	46635000000	Fructose-bisphosphate aldolase A;Fructose-bisphosphate aldolase	ALDOA	;;;;	12	37	37	29	36	34	32	36	34	32	28	26	25	90.9	90.9	77.2	39.42	364	364;418;368;361;278;155;162;140;204;130;223;364	1	964	0	323.31	90.9	89.8	89.8	45728000000	50862000000	53295000000	46053000000	59	76	70	871
P04080	P04080	6	6	6	826960000	797290000	596000000	Cystatin-B	CSTB		1	6	6	6	5	6	4	5	6	4	5	6	4	79.6	79.6	79.6	11.139	98	98	1	121	0	39.332	77.6	79.6	55.1	600390000	827000000	876020000	597110000	6	8	4	73
P04083;Q5T3N1;Q5T3N0	P04083	26;11;8	26;11;8	26;11;8	19868000000	18167000000	20104000000	Annexin A1	ANXA1		3	26	26	26	24	23	24	24	23	24	24	23	24	72.5	72.5	72.5	38.714	346	346;204;115	1	623	0	323.31	69.1	70.5	72.5	17700000000	22527000000	17836000000	18489000000	47	45	41	522
P04114	P04114	4	3	3	32774000	0	37204000	Apolipoprotein B-100;Apolipoprotein B-48	APOB		1	4	3	3	2	1	2	2	1	2	2	1	2	1	0.7	0.7	515.6	4563	4563	1	21	0	5.2479	0.4	0.2	0.4	47037000	40903000	27225000	33440000	1	1	1	14
P04150-9;P04150-2;P04150-6;P04150-8;P04150-10;P04150;P04150-3;P04150-7;P04150-5;B7Z7I2;D6RDA9;Q3MSN4	P04150-9;P04150-2;P04150-6;P04150-8;P04150-10;P04150;P04150-3;P04150-7;P04150-5	5;5;5;5;5;5;5;3;3;2;1;1	5;5;5;5;5;5;5;3;3;2;1;1	5;5;5;5;5;5;5;3;3;2;1;1	69787000	62843000	64727000	Glucocorticoid receptor	NR3C1	;;;;;;;;	12	5	5	5	4	4	5	4	4	5	4	4	5	9.5	9.5	9.5	78.695	716	716;742;743;751;751;777;778;558;593;380;144;145	1	55	0	7.8678	8.1	7.7	9.5	76678000	81054000	86010000	81325000	1	0	0	10
P04179;P04179-4;F5H4R2;F5GYZ5;P04179-2;F5H3C5;P04179-3;G8JLJ2;G5E9P6;F5GXZ9	P04179;P04179-4;F5H4R2;F5GYZ5;P04179-2;F5H3C5;P04179-3;G8JLJ2	12;11;10;10;10;9;7;6;3;3	12;11;10;10;10;9;7;6;3;3	12;11;10;10;10;9;7;6;3;3	11553000000	10771000000	10233000000	Superoxide dismutase [Mn], mitochondrial	SOD2	;;;;;;;	10	12	12	12	12	12	12	12	12	12	12	12	12	66.2	66.2	66.2	24.722	222	222;176;183;190;183;111;162;61;140;141	1	315	0	323.31	66.2	66.2	66.2	11323000000	12924000000	12129000000	10260000000	25	30	22	281
P04181;P04181-2	P04181;P04181-2	5;4	5;4	5;4	44595000	40258000	52035000	Ornithine aminotransferase, mitochondrial;Ornithine aminotransferase, hepatic form;Ornithine aminotransferase, renal form	OAT	;	2	5	5	5	4	4	3	4	4	3	4	4	3	16.4	16.4	16.4	48.534	439	439;301	1	45	0	9.4224	11.8	11.8	11.2	42803000	54777000	52232000	38537000	1	1	1	17
P04183;K7ERV3;K7ES52;K7ERJ1;K7ENW5	P04183;K7ERV3;K7ES52;K7ERJ1	9;8;6;6;3	9;8;6;6;3	9;8;6;6;3	116430000	129720000	114480000	Thymidine kinase, cytosolic;Thymidine kinase	TK1	;;;	5	9	9	9	6	9	6	6	9	6	6	9	6	50	50	50	25.468	234	234;267;180;187;87	1	86	0	19.894	34.6	50	32.1	170250000	105530000	176800000	117460000	4	6	0	27
P04259	P04259	21	7	0	0	88328000	152710000	Keratin, type II cytoskeletal 6B	KRT6B		1	21	7	0	14	18	18	2	6	6	0	0	0	36.3	16.8	0	60.066	564	564	1	40	0	13.716	21.3	28.4	31.4	100250000	19662000	121070000	184000000	0	3	4	18
P04406;P04406-2;E7EUT5	P04406;P04406-2;E7EUT5	21;18;17	21;18;17	20;17;16	105480000000	98036000000	91596000000	Glyceraldehyde-3-phosphate dehydrogenase	GAPDH	;;	3	21	21	20	21	20	20	21	20	20	20	19	19	82.1	82.1	80	36.053	335	335;293;260	1	1728	0	323.31	82.1	73.7	73.7	90208000000	124690000000	106330000000	99425000000	149	130	120	1580
P04632;K7ELJ7;U3KQE2;K7EM73;K7EIV0;U3KPR7;K7ES78;K7EMQ1;Q96L46	P04632;K7ELJ7;U3KQE2;K7EM73;K7EIV0	11;10;7;7;7;4;2;2;2	11;10;7;7;7;4;2;2;2	3;3;2;3;3;0;0;0;0	2417500000	2356500000	2161600000	Calpain small subunit 1	CAPNS1	;;;;	9	11	11	3	10	10	10	10	10	10	2	2	2	77.6	77.6	23.1	28.315	268	268;278;161;163;196;100;72;94;248	1	232	0	323.31	69	69	69	1728900000	3526700000	2101100000	1867500000	10	16	15	153
P04792;F8WE04;C9J3N8	P04792;F8WE04	16;9;2	16;9;2	16;9;2	9051300000	9613200000	9943900000	Heat shock protein beta-1	HSPB1	;	3	16	16	16	16	15	16	16	15	16	16	15	16	84.9	84.9	84.9	22.782	205	205;186;37	1	361	0	323.31	84.9	81.5	84.9	9832800000	10068000000	10411000000	10474000000	30	30	29	348
P04818;P04818-2;P04818-3	P04818;P04818-2	5;3;2	5;3;2	5;3;2	60564000	38077000	65422000	Thymidylate synthase	TYMS	;	3	5	5	5	4	3	2	4	3	2	4	3	2	20.1	20.1	20.1	35.716	313	313;279;230	1	33	0	9.0524	16.6	13.1	10.2	59552000	63776000	58416000	51942000	2	0	1	9
P04843;B7Z4L4;F8WF32	P04843;B7Z4L4	36;28;5	36;28;5	36;28;5	10010000000	9582600000	9525000000	Dolichyl-diphosphooligosaccharide--protein glycosyltransferase subunit 1	RPN1	;	3	36	36	36	34	33	33	34	33	33	34	33	33	67.9	67.9	67.9	68.569	607	607;435;121	1	652	0	323.31	63.6	64.9	63.9	9759000000	10746000000	9929700000	9595100000	41	43	40	507
P04844;P04844-2;Q5JYR7;Q5JYR4;F2Z3K5;Q5JYR3;H0Y5M1	P04844;P04844-2	21;20;8;7;5;4;3	21;20;8;7;5;4;3	21;20;8;7;5;4;3	4446300000	4426200000	4555700000	Dolichyl-diphosphooligosaccharide--protein glycosyltransferase subunit 2	RPN2	;	7	21	21	21	21	20	19	21	20	19	21	20	19	51	51	51	69.283	631	631;615;344;166;162;138;147	1	425	0	323.31	51	45.8	45.2	3748100000	4766500000	4579200000	4359100000	33	33	27	377
P04899;P04899-4;P04899-6;P04899-3;P04899-5;P04899-2;F5GZL8	P04899;P04899-4;P04899-6;P04899-3;P04899-5;P04899-2;F5GZL8	16;15;14;14;14;14;12	16;15;14;14;14;14;12	8;8;8;8;8;8;6	1543900000	1868100000	1901600000	Guanine nucleotide-binding protein G(i) subunit alpha-2	GNAI2	;;;;;;	7	16	16	8	14	15	13	14	15	13	7	8	7	61.1	61.1	36.1	40.45	355	355;366;303;318;339;339;274	1	269	0	155.99	54.9	58	50.7	1760300000	1882800000	1793200000	1961500000	21	13	13	177
P05023-4;P05023;P05023-3;P05023-2;B1AKY9;P50993;H0Y7C1;Q13733;Q5TC01;P20648;Q5TC02;E9PRA5;Q5TC05;M0QXF2	P05023-4;P05023;P05023-3;P05023-2	44;44;39;30;15;15;13;9;5;5;4;4;2;1	44;44;39;30;15;15;13;9;5;5;4;4;2;1	28;28;23;24;2;2;2;1;4;0;4;1;1;0	4253300000	4106000000	4162700000	Sodium/potassium-transporting ATPase subunit alpha-1	ATP1A1	;;;	14	44	44	28	38	38	37	38	38	37	25	24	25	48.2	48.2	29.8	113	1023	1023;1023;992;681;1009;1020;714;1029;144;1035;106;517;157;178	1	641	0	323.31	42.3	41.6	41.8	3996600000	4862000000	4494900000	4225300000	33	34	33	402
P05091-2;P05091;S4R3S4;F8VP50	P05091-2;P05091	11;11;4;3	10;10;4;3	10;10;4;3	275830000	263840000	254700000	Aldehyde dehydrogenase, mitochondrial	ALDH2	;	4	11	10	10	7	7	8	6	6	7	6	6	7	29.6	27.9	27.9	50.989	470	470;517;117;261	1	91	0	28.558	20.9	18.7	22.8	226930000	176000000	444890000	207500000	6	5	3	54
P05120;E7ERB5;E7EPJ9;E9PDK7;H7C004;H7BYS2	P05120	9;4;4;3;1;1	9;4;4;3;1;1	9;4;4;3;1;1	195280000	147680000	151930000	Plasminogen activator inhibitor 2	SERPINB2		6	9	9	9	8	7	5	8	7	5	8	7	5	29.6	29.6	29.6	46.596	415	415;132;161;113;253;280	1	75	0	33.014	27.2	22.2	13.7	162800000	228310000	204290000	157280000	5	2	0	25
P05141;Q9H0C2	P05141	15;3	6;0	6;0	2168200000	2213300000	1996700000	ADP/ATP translocase 2;ADP/ATP translocase 2, N-terminally processed	SLC25A5		2	15	6	6	15	15	15	6	6	6	6	6	6	45.3	19.5	19.5	32.852	298	298;315	1	158	0	50.873	45.3	45.3	45.3	1833600000	2394500000	2379300000	2258600000	10	7	10	95
P05161	P05161	13	13	13	32960000000	32073000000	30537000000	Ubiquitin-like protein ISG15	ISG15		1	13	13	13	11	11	10	11	11	10	11	11	10	85.5	85.5	85.5	17.887	165	165	1	719	0	323.31	85.5	77	64.2	31939000000	36137000000	36374000000	32354000000	65	55	62	654
P05187;P10696;P09923	P05187;P10696	9;5;1	9;5;1	9;5;1	66794000	85242000	82996000	Alkaline phosphatase, placental type;Alkaline phosphatase, placental-like	ALPP;ALPPL2	;	3	9	9	9	8	6	4	8	6	4	8	6	4	26.9	26.9	26.9	57.953	535	535;532;528	1	70	0	22.73	24.3	18.5	9.7	80723000	112150000	62426000	91098000	0	1	0	21
P05198;G3V4T5;H0YJS4	P05198;G3V4T5;H0YJS4	23;19;18	23;19;18	23;19;18	2694900000	2648100000	2739400000	Eukaryotic translation initiation factor 2 subunit 1	EIF2S1	;;	3	23	23	23	22	23	20	22	23	20	22	23	20	69.8	69.8	69.8	36.112	315	315;273;252	1	397	0	323.31	69.5	69.8	60.6	3045100000	2943600000	2697800000	2681900000	22	18	18	246
P05204	P05204	2	2	1	802210000	1445100000	49696000	Non-histone chromosomal protein HMG-17	HMGN2		1	2	2	1	1	1	1	1	1	1	0	0	0	23.3	23.3	13.3	9.3926	90	90	1	29	0	8.2253	10	10	10	428640000	927210000	1139900000	491690000	2	1	2	22
P05362;E7ESS4;K7EKL8	P05362	13;6;5	13;6;5	13;6;5	363540000	348610000	319720000	Intercellular adhesion molecule 1	ICAM1		3	13	13	13	11	12	10	11	12	10	11	12	10	33.5	33.5	33.5	57.825	532	532;310;180	1	138	0	56.017	29.7	30.1	27.4	331190000	379290000	391500000	365990000	9	5	4	68
P05386	P05386	3	2	2	1283500000	1266900000	1608400000	60S acidic ribosomal protein P1	RPLP1		1	3	2	2	3	3	3	2	2	2	2	2	2	66.7	51.8	51.8	11.514	114	114	1	52	0	75.101	66.7	66.7	66.7	1295800000	1539400000	1336600000	1638000000	5	6	7	65
P05387;H0YDD8;P05386-2	P05387	9;3;1	9;3;1	8;2;0	5110700000	4916500000	5533600000	60S acidic ribosomal protein P2	RPLP2		3	9	9	8	8	9	9	8	9	9	7	8	8	92.2	92.2	77.4	11.665	115	115;92;89	1	197	0	181.83	85.2	92.2	92.2	4557500000	5249000000	5605400000	5577100000	21	20	14	204
P05388;F8VWS0;Q3B7A4;F8VU65;F8VW21;F8VPE8;G3V210;F8VZS0;F8VQY6;F8VRK7;Q8NHW5;F8VS58;F8VWV4;F8W1K8	P05388;F8VWS0;Q3B7A4;F8VU65;F8VW21;F8VPE8;G3V210;F8VZS0;F8VQY6;F8VRK7;Q8NHW5;F8VS58	13;12;12;11;10;9;9;9;8;8;8;7;6;3	13;12;12;11;10;9;9;9;8;8;8;7;6;3	13;12;12;11;10;9;9;9;8;8;8;7;6;3	6570200000	6129700000	6704300000	60S acidic ribosomal protein P0;60S acidic ribosomal protein P0-like	RPLP0;RPLP0P6	;;;;;;;;;;;	14	13	13	13	12	13	12	12	13	12	12	13	12	58	58	58	34.273	317	317;281;255;247;244;153;166;246;142;156;317;121;111;107	1	238	0	201.84	49.8	58	49.8	6811200000	7530500000	6886800000	6593900000	22	23	18	242
P05455;E7ERC4;E9PFL9;E9PGX9	P05455;E7ERC4	27;17;12;10	27;17;12;10	27;17;12;10	1852500000	1917800000	2059300000	Lupus La protein	SSB	;	4	27	27	27	21	22	24	21	22	24	21	22	24	59.3	59.3	59.3	46.836	408	408;184;134;120	1	400	0	141.69	49.8	53.7	52.5	2040700000	1953400000	1951500000	2089100000	19	23	21	228
P05556;P05556-2;P05556-5;P05556-4;P05556-3;E7EQW5;C9JPK5;Q5T3E6;E9PLR6;E7EUI6;E7ERX5;C9JJP8;Q5T3E5;E9PQJ2;H7C4N8;C9JNE0	P05556;P05556-2;P05556-5;P05556-4;P05556-3	24;22;22;22;22;7;6;6;6;6;5;4;4;4;3;1	24;22;22;22;22;7;6;6;6;6;5;4;4;4;3;1	24;22;22;22;22;7;6;6;6;6;5;4;4;4;3;1	4479900000	4743300000	4570200000	Integrin beta-1	ITGB1	;;;;	16	24	24	24	22	23	23	22	23	23	22	23	23	35.2	35.2	35.2	88.414	798	798;789;801;819;825;163;98;136;143;152;124;31;89;104;108;14	1	439	0	233.82	33.1	34.3	34.3	4879100000	4957100000	4875800000	4829800000	29	31	23	321
P06132;H0Y5R6;Q5T446	P06132;H0Y5R6	10;6;4	10;6;4	10;6;4	350650000	311450000	342120000	Uroporphyrinogen decarboxylase	UROD	;	3	10	10	10	8	9	9	8	9	9	8	9	9	41.7	41.7	41.7	40.786	367	367;228;193	1	124	0	53.306	33.5	34.9	37.9	340260000	331090000	333190000	315950000	6	6	7	65
P06280;V9GYN5	P06280	8;3	8;3	8;3	107640000	89007000	78904000	Alpha-galactosidase A	GLA		2	8	8	8	5	4	7	5	4	7	5	4	7	22.1	22.1	22.1	48.766	429	429;222	1	56	0	14.144	14.7	11.9	20	49370000	111050000	77962000	104740000	4	1	3	22
P06493;P06493-2;E5RIU6;K7ELV5;G3V317;J3QSD7;Q96Q40-2;Q96Q40-4;Q96Q40-3;Q96Q40-5;Q96Q40;Q07002;Q07002-2;Q07002-3;Q9NYV4-3;Q14004-2;Q14004	P06493;P06493-2;E5RIU6	13;10;9;2;1;1;1;1;1;1;1;1;1;1;1;1;1	13;10;9;2;1;1;1;1;1;1;1;1;1;1;1;1;1	11;9;7;0;0;0;0;0;0;0;0;0;0;0;0;0;0	674190000	749050000	759140000	Cyclin-dependent kinase 1	CDK1	;;	17	13	13	11	10	10	10	10	10	10	8	8	8	54.5	54.5	48.1	34.095	297	297;240;189;164;39;1201;358;384;400;429;435;472;474;504;1273;1452;1512	1	150	0	41.493	36.7	38.4	41.1	682880000	644190000	744620000	764130000	5	7	8	88
P06576;H0YH81;F8W0P7	P06576;H0YH81	26;21;9	26;21;9	2;2;2	16246000000	15773000000	16772000000	ATP synthase subunit beta, mitochondrial;ATP synthase subunit beta	ATP5B	;	3	26	26	2	24	23	23	24	23	23	2	1	1	72.4	72.4	5.7	56.559	529	529;362;270	1	724	0	323.31	66.5	63.5	63.5	15014000000	19819000000	16592000000	17335000000	53	51	54	625
P06733;K7EM90	P06733	27;11	27;11	7;7	57281000000	57887000000	58197000000	Alpha-enolase	ENO1		2	27	27	7	25	26	25	25	26	25	7	7	7	68	68	12	47.168	434	434;195	1	1497	0	323.31	67.3	62.9	66.4	59706000000	61412000000	66416000000	68148000000	120	116	118	1374
P06737-2;P06737;E9PK47	P06737-2;P06737;E9PK47	37;37;35	37;37;35	30;30;28	1873300000	1797100000	1918900000	Glycogen phosphorylase, liver form;Alpha-1,4 glucan phosphorylase	PYGL	;;	3	37	37	30	34	32	29	34	32	29	27	25	22	50.7	50.7	42.8	93.133	813	813;847;819	1	514	0	195.73	47.6	46.9	39.7	1913700000	2138400000	1939700000	1987700000	28	22	21	278
P06744;P06744-2;K7EQ48;K7EPY4;K7EP41;K7ELR7;K7ENA0;K7ERC6;K7ERK8;K7ESF4;K7EIL4;Q8N196	P06744;P06744-2;K7EQ48	22;21;19;7;6;4;4;3;2;2;1;1	22;21;19;7;6;4;4;3;2;2;1;1	16;15;14;6;5;3;4;3;2;2;1;1	10534000000	11431000000	10549000000	Glucose-6-phosphate isomerase	GPI	;;	12	22	22	16	19	20	19	19	20	19	14	14	13	51.6	51.6	38.2	63.146	558	558;569;474;166;159;146;162;161;133;209;110;739	1	420	0	323.31	44.3	44.3	45.3	9872400000	13413000000	11801000000	10506000000	30	36	25	357
P06748;P06748-3;P06748-2;E5RI98;E5RGW4	P06748;P06748-3;P06748-2	12;11;11;3;1	12;11;11;3;1	12;11;11;3;1	9895300000	9761500000	11057000000	Nucleophosmin	NPM1	;;	5	12	12	12	12	12	12	12	12	12	12	12	12	50	50	50	32.575	294	294;259;265;111;59	1	291	0	206.84	50	50	50	10827000000	11089000000	10284000000	9971400000	19	18	19	235
P06753-2;Q5VU59;P06753-3;Q5VU61;D6R904;D6RFM2	P06753-2;Q5VU59;P06753-3;Q5VU61	26;24;22;21;10;3	26;24;22;21;10;3	0;0;0;0;0;0	11793000000	12307000000	12286000000		DKFZp686J1372;TPM3	;;;	6	26	26	0	26	25	25	26	25	25	0	0	0	73.4	73.4	0	29.032	248	248;232;247;223;95;49	1	541	0	152.36	73.4	73.4	70.6	12900000000	13613000000	13482000000	13177000000	26	24	24	292
P06756-3;P06756-2;P06756;H7BZG1	P06756-3;P06756-2;P06756	21;21;21;3	21;21;21;3	21;21;21;3	552910000	551120000	615580000	Integrin alpha-V;Integrin alpha-V heavy chain;Integrin alpha-V light chain	ITGAV	;;	4	21	21	21	18	20	19	18	20	19	18	20	19	28.6	28.6	28.6	111.13	1002	1002;1012;1048;136	1	260	0	76.502	22.3	26.9	26.3	599050000	689800000	747100000	714830000	11	11	8	122
P07093-2;P07093;P07093-3;C9JN98	P07093-2;P07093;P07093-3;C9JN98	8;8;8;4	8;8;8;4	8;8;8;4	180150000	155790000	164490000	Glia-derived nexin	SERPINE2	;;;	4	8	8	8	7	7	7	7	7	7	7	7	7	23.9	23.9	23.9	44	397	397;398;409;275	1	81	0	14.102	21.4	21.9	20.9	189770000	159830000	197900000	186060000	2	1	2	21
P07099;B1AQP9;B1AQP8	P07099	24;8;6	24;8;6	24;8;6	2596900000	2721500000	2690500000	Epoxide hydrolase 1	EPHX1		3	24	24	24	22	21	23	22	21	23	22	21	23	65.3	65.3	65.3	52.948	455	455;161;136	1	371	0	259.72	63.1	59.1	65.3	2823500000	2578200000	2927000000	2821300000	17	18	23	229
P07108;P07108-3;P07108-2;P07108-4;P07108-5;P07108-6	P07108;P07108-3;P07108-2;P07108-4;P07108-5	7;6;6;6;6;2	7;6;6;6;6;2	7;6;6;6;6;2	1872400000	2004900000	2107700000	Acyl-CoA-binding protein	DBI	;;;;	6	7	7	7	6	6	5	6	6	5	6	6	5	72.4	72.4	72.4	10.044	87	87;88;104;129;148;123	1	141	0	100.29	70.1	70.1	58.6	2171700000	2524700000	2302800000	1741900000	6	9	5	78
P07195;A8MW50;C9J7H8;F5H793	P07195;A8MW50	21;11;10;9	20;10;10;9	20;10;10;9	23982000000	23610000000	24085000000	L-lactate dehydrogenase B chain;L-lactate dehydrogenase	LDHB	;	4	21	20	20	20	17	17	19	16	16	19	16	16	60.8	57.2	57.2	36.638	334	334;232;136;102	1	501	0	323.31	60.8	48.8	54.8	23273000000	27412000000	23671000000	23692000000	38	34	32	403
P07203;P07203-2	P07203	7;1	7;1	7;1	152620000	175310000	137380000	Glutathione peroxidase 1	GPX1		2	7	7	7	5	6	6	5	6	6	5	6	6	54.2	54.2	54.2	22.088	203	203;98	1	67	0	34.33	37.9	43.3	43.3	91655000	114300000	232950000	184800000	2	3	2	27
P07205	P07205	7	2	2	30691000	0	45201000	Phosphoglycerate kinase 2	PGK2		1	7	2	2	7	6	7	2	1	2	2	1	2	17.7	3.6	3.6	44.796	417	417	1	20	0.0093671	1.713	17.7	16.1	17.7	42759000	34937000	15355000	50683000	1	1	1	7
P07237;H7BZ94;F5H8J2;H0Y3Z3;I3L398;I3L312;I3L3U6;I3L0S0;I3NI03;I3L4M2;I3L514;I3L3P5;I3L1Y5	P07237;H7BZ94;F5H8J2;H0Y3Z3	35;32;31;19;15;13;10;9;9;8;5;5;2	35;32;31;19;15;13;10;9;9;8;5;5;2	35;32;31;19;15;13;10;9;9;8;5;5;2	19902000000	20229000000	19813000000	Protein disulfide-isomerase	P4HB	;;;	13	35	35	35	33	33	33	33	33	33	33	33	33	69.7	69.7	69.7	57.116	508	508;464;451;274;200;208;188;148;166;117;106;156;54	1	823	0	323.31	60.8	60.8	60.8	18561000000	21879000000	20420000000	20083000000	52	56	50	611
P07305;P07305-2	P07305;P07305-2	4;3	4;3	4;3	290130000	235180000	263980000	Histone H1.0;Histone H1.0, N-terminally processed	H1F0	;	2	4	4	4	4	4	4	4	4	4	4	4	4	21.6	21.6	21.6	20.863	194	194;177	1	69	0	12.539	21.6	21.6	21.6	304240000	264860000	253560000	263910000	2	2	2	25
P07311;G3V2U7;G3V3F8;G3V597;P07311-2	P07311;G3V2U7	5;4;1;1;1	5;4;1;1;1	5;4;1;1;1	1511400000	1646600000	1682700000	Acylphosphatase-1;Acylphosphatase	ACYP1	;	5	5	5	5	4	4	4	4	4	4	4	4	4	60.6	60.6	60.6	11.261	99	99;129;37;62;55	1	63	0	15.27	44.4	44.4	44.4	2711500000	1664200000	1399400000	1558300000	5	2	1	31
P07339;C9JH19;H7C469;F8WD96;H7C1V0;F8W787	P07339;C9JH19;H7C469;F8WD96	17;11;11;9;7;6	17;11;11;9;7;6	17;11;11;9;7;6	4802300000	4429600000	4709500000	Cathepsin D;Cathepsin D light chain;Cathepsin D heavy chain	CTSD	;;;	6	17	17	17	17	16	17	17	16	17	17	16	17	53.2	53.2	53.2	44.552	412	412;299;379;276;189;199	1	362	0	323.31	53.2	51.2	53.2	4136800000	5497300000	4589700000	5006300000	20	20	22	257
P07355;P07355-2;H0YN42;H0YMD0;H0YMU9;A6NMY6;H0YM50;H0YKS4;H0YNP5;H0YN28;H0YL33;H0YMM1;H0YKZ7;H0YLV6;H0YMT9;H0YKX9;H0YKL9;H0YMW4;H0YNA0;H0YN52;H0YKV8;H0YMD9;H0YNB8;H0YKN4;H0YLE2	P07355;P07355-2;H0YN42;H0YMD0;H0YMU9;A6NMY6;H0YM50;H0YKS4;H0YNP5	29;28;24;23;23;21;20;18;15;13;13;13;11;11;11;11;10;10;9;7;7;6;5;5;2	29;28;24;23;23;21;20;18;15;13;13;13;11;11;11;11;10;10;9;7;7;6;5;5;2	29;28;24;23;23;21;20;18;15;13;13;13;11;11;11;11;10;10;9;7;7;6;5;5;2	39576000000	41360000000	40546000000	Annexin A2;Annexin;Putative annexin A2-like protein	ANXA2;ANXA2P2	;;;;;;;;	25	29	29	29	29	28	29	29	28	29	29	28	29	74.6	74.6	74.6	38.604	339	339;357;256;227;230;339;248;176;175;139;142;149;119;132;133;134;110;146;79;59;81;65;47;69;45	1	622	0	323.31	74.6	69.9	74.6	39504000000	43897000000	38591000000	38562000000	39	43	41	511
P07384;E9PRM1;E9PLX0;E9PJJ3;E9PLC9;E9PMC6;E9PJA6;E9PSA6;E9PQB3;E9PL37;E9PIA9	P07384	31;5;4;4;4;4;4;4;4;4;3	31;5;4;4;4;4;4;4;4;4;3	31;5;4;4;4;4;4;4;4;4;3	1062800000	1087100000	1164000000	Calpain-1 catalytic subunit	CAPN1		11	31	31	31	27	26	23	27	26	23	27	26	23	53.4	53.4	53.4	81.889	714	714;201;122;135;148;152;161;163;191;191;63	1	369	0	144.55	48	44.4	36.4	985910000	1248600000	1160900000	1074700000	19	16	17	193
P07686;Q5URX0;H0YA83;H0Y9B6;D6REQ8;H0Y9M3	P07686;Q5URX0	15;12;6;6;1;1	15;12;6;6;1;1	15;12;6;6;1;1	903090000	826050000	822410000	Beta-hexosaminidase subunit beta;Beta-hexosaminidase subunit beta chain B;Beta-hexosaminidase subunit beta chain A	HEXB	;	6	15	15	15	14	12	12	14	12	12	14	12	12	37.1	37.1	37.1	63.111	556	556;331;170;202;35;52	1	211	0	60.552	35.4	26.1	28.6	680770000	975760000	827700000	683910000	15	10	11	135
P07711;Q5T8F0;Q5QP40;P43235;O60911	P07711;Q5T8F0	8;4;1;1;1	8;4;1;1;1	7;3;0;0;0	1426800000	1522500000	1557300000	Cathepsin L1;Cathepsin L1 heavy chain;Cathepsin L1 light chain	CTSL	;	5	8	8	7	8	7	7	8	7	7	7	6	6	41.1	41.1	39	37.564	333	333;225;258;329;334	1	124	0	88.105	41.1	34.2	34.2	1672600000	1879700000	1870400000	1864000000	8	6	5	75
P07741;H3BQZ9;P07741-2;H3BQB1;H3BQF1;H3BSW3	P07741;H3BQZ9;P07741-2;H3BQB1;H3BQF1	10;8;8;7;6;4	10;8;8;7;6;4	10;8;8;7;6;4	515590000	502270000	643670000	Adenine phosphoribosyltransferase	APRT	;;;;	6	10	10	10	8	9	7	8	9	7	8	9	7	70.6	70.6	70.6	19.608	180	180;153;134;162;148;63	1	119	0	150.55	48.9	63.3	53.3	577690000	508620000	657660000	527470000	3	6	5	67
P07814;V9GYZ6;V9GZ76	P07814;V9GYZ6	66;43;5	66;43;5	66;43;5	6193500000	5996400000	5960500000	Bifunctional glutamate/proline--tRNA ligase;Glutamate--tRNA ligase;Proline--tRNA ligase	EPRS	;	3	66	66	66	56	59	59	56	59	59	56	59	59	57.7	57.7	57.7	170.59	1512	1512;968;194	1	980	0	323.31	48.9	51.5	52.4	5389600000	7164600000	6827700000	6216200000	52	54	52	585
P07858;R4GMQ5;E9PR54;E9PJ67;E9PCB3;E9PKQ7;E9PNL5;E9PHZ5;E9PLY3;E9PSG5;E9PQM1;E9PS78	P07858	8;2;2;2;2;2;2;2;2;2;2;1	8;2;2;2;2;2;2;2;2;2;2;1	8;2;2;2;2;2;2;2;2;2;2;1	629240000	622820000	507150000	Cathepsin B;Cathepsin B light chain;Cathepsin B heavy chain	CTSB		12	8	8	8	8	7	8	8	7	8	8	7	8	31	31	31	37.821	339	339;76;98;101;110;136;143;148;165;170;175;92	1	126	0	38.266	31	26	31	569970000	690410000	702910000	547950000	7	7	8	69
P07900;P07900-2;Q86U12;G3V2J8;Q14568;Q58FG0	P07900;P07900-2;Q86U12	45;45;31;10;8;7	28;28;19;5;2;3	27;27;18;5;2;3	17362000000	16947000000	17399000000	Heat shock protein HSP 90-alpha	HSP90AA1	;;	6	45	28	27	43	43	43	26	26	26	25	25	25	57.9	38.7	37.7	84.659	732	732;854;413;174;343;334	1	723	0	323.31	57.4	57.4	57.4	16373000000	19786000000	18371000000	18684000000	56	52	67	666
P07919	P07919	4	4	4	445760000	534220000	467200000	Cytochrome b-c1 complex subunit 6, mitochondrial	UQCRH		1	4	4	4	4	4	4	4	4	4	4	4	4	38.5	38.5	38.5	10.739	91	91	1	61	0	208.03	38.5	38.5	38.5	444730000	514430000	573170000	431340000	3	4	3	38
P07954-2;P07954	P07954-2;P07954	20;19	20;19	20;19	1461000000	1516400000	1511100000	Fumarate hydratase, mitochondrial	FH	;	2	20	20	20	17	14	15	17	14	15	17	14	15	65.5	65.5	65.5	50.212	467	467;510	1	284	0	261.34	60	45.6	49.5	1262500000	1495400000	1559400000	1585200000	19	14	15	189
P08107;P08107-2;E7EP94;V9GZ37	P08107;P08107-2;E7EP94;V9GZ37	40;36;33;29	36;32;31;27	18;15;14;12	22499000000	22565000000	23621000000	Heat shock 70 kDa protein 1A	HSPA1A	;;;	4	40	36	18	34	35	33	30	31	29	14	16	14	72.7	67.4	36.3	70.051	641	641;586;550;476	1	783	0	323.31	64.6	61.6	61.5	21537000000	25104000000	24980000000	24383000000	62	53	53	705
P08133;P08133-2;E7EMC6	P08133;P08133-2;E7EMC6	31;30;16	31;30;16	1;1;1	1407600000	1328800000	1362500000	Annexin A6;Annexin	ANXA6	;;	3	31	31	1	27	27	28	27	27	28	1	1	1	53.9	53.9	3	75.872	673	673;641;330	1	421	0	142.01	48.4	45.8	49	1311800000	1613000000	1393700000	1474100000	22	18	18	197
P08236-2;P08236;F8WBK6;F2Z3L6;P08236-3	P08236-2;P08236;F8WBK6;F2Z3L6;P08236-3	3;3;2;2;2	3;3;2;2;2	3;3;2;2;2	20049000	0	0	Beta-glucuronidase	GUSB	;;;;	5	3	3	3	3	0	2	3	0	2	3	0	2	9	9	9	69.141	600	600;651;134;144;505	1	18	0.00026795	3.5534	9	0	5.8	8601400	25962000	0	23893000	0	0	0	7
P08237;P08237-3;P08237-2;F8VNX2;F8VZQ1;F8VX13;F8VP00;F8VSL1;F8W1J8;F8VSF7;F8VW30;F8VUB8;F8VYK8;F8VTQ3;F8VZI0;F8VVE3;F8VZ53;F8VSF5;H0YIS9	P08237;P08237-3;P08237-2	27;26;25;7;7;6;6;5;4;4;4;3;3;3;3;2;1;1;1	25;24;24;7;7;6;6;5;4;4;4;3;3;3;3;2;1;1;1	24;23;24;7;7;6;6;5;4;4;4;3;3;3;3;2;1;1;1	1273400000	1399500000	1332000000	ATP-dependent 6-phosphofructokinase, muscle type	PFKM	;;	19	27	25	24	22	22	22	21	20	20	20	19	19	45.9	43.6	42.4	85.182	780	780;851;749;157;161;156;176;139;84;102;116;141;149;149;152;165;59;73;97	1	328	0	248.43	39.1	38.6	38.2	1468300000	1513700000	1615500000	1461300000	19	12	16	186
P08238	P08238	54	53	20	49205000000	50730000000	51111000000	Heat shock protein HSP 90-beta	HSP90AB1		1	54	53	20	54	51	50	53	50	49	20	18	18	70.4	68.8	32.5	83.263	724	724	1	1641	0	323.31	70.4	65.3	65.2	51560000000	60780000000	56256000000	55814000000	117	115	116	1368
P08240;P08240-2	P08240;P08240-2	17;16	17;16	17;16	527300000	526380000	573120000	Signal recognition particle receptor subunit alpha	SRPR	;	2	17	17	17	14	14	15	14	14	15	14	14	15	31.5	31.5	31.5	69.81	638	638;610	1	213	0	57.102	26.5	26	27.9	504830000	631940000	556850000	590350000	9	9	6	100
P08243-2;P08243;P08243-3;F8WEJ5;C9J057;C9JT45;C9JM09;C9JLN6	P08243-2;P08243;P08243-3;F8WEJ5	9;9;8;6;4;3;2;1	9;9;8;6;4;3;2;1	9;9;8;6;4;3;2;1	112380000	124590000	144970000	Asparagine synthetase [glutamine-hydrolyzing]	ASNS	;;;	8	9	9	9	7	6	8	7	6	8	7	6	8	25	25	25	62.168	540	540;561;478;401;214;162;118;63	1	79	0	20.581	20.7	15.4	22.2	118040000	145900000	120230000	181140000	3	3	5	42
P08397-2;P08397;F5H345;F5GY90;P08397-4;P08397-3;F5H226;F5H0P4	P08397-2;P08397;F5H345;F5GY90;P08397-4;P08397-3;F5H226	6;6;5;4;4;4;3;1	6;6;5;4;4;4;3;1	6;6;5;4;4;4;3;1	47256000	0	0	Porphobilinogen deaminase	HMBS	;;;;;;	8	6	6	6	3	1	3	3	1	3	3	1	3	25.6	25.6	25.6	37.699	344	344;361;330;187;304;321;191;119	1	37	0	8.6752	16	3.2	11.3	59752000	39753000	13149000	32360000	2	1	0	17
P08559;P08559-4;P08559-3;P08559-2;Q5JPU3;Q5JPU0;Q5JPT9;Q5JPU1;P29803	P08559;P08559-4;P08559-3;P08559-2	16;16;15;15;4;4;4;4;3	16;16;15;15;4;4;4;4;3	16;16;15;15;4;4;4;4;3	805200000	846230000	850220000	Pyruvate dehydrogenase E1 component subunit alpha, somatic form, mitochondrial	PDHA1	;;;	9	16	16	16	12	13	12	12	13	12	12	13	12	57.2	57.2	57.2	43.295	390	390;428;359;397;109;180;203;205;388	1	195	0	93.257	38.2	40	37.7	781070000	1011800000	999160000	683920000	12	10	10	121
P08572	P08572	7	7	7	218100000	245180000	198490000	Collagen alpha-2(IV) chain;Canstatin	COL4A2		1	7	7	7	5	6	6	5	6	6	5	6	6	5.5	5.5	5.5	167.55	1712	1712	1	78	0	13.396	4	4.6	4.6	182720000	165880000	279050000	248170000	2	2	2	21
P08574	P08574	12	12	12	1347500000	1454600000	1446500000	Cytochrome c1, heme protein, mitochondrial	CYC1		1	12	12	12	11	10	11	11	10	11	11	10	11	39.7	39.7	39.7	35.422	325	325	1	190	0	248.01	39.7	34.8	39.7	1409600000	1385200000	1781600000	1254500000	8	9	9	110
P08579	P08579	7	5	5	267390000	249710000	241920000	U2 small nuclear ribonucleoprotein B	SNRPB2		1	7	5	5	7	7	7	5	5	5	5	5	5	32	25.3	25.3	25.486	225	225	1	72	0	17.902	32	32	32	278090000	304840000	272240000	284960000	3	2	2	26
P08581;P08581-2;P08581-3;B4DPY6;H7C174;H7C130;C9JKM5;H7C3Z8;H7C074;B4DY49;Q9H3Y6;P42685;P12931;P12931-2;Q04912-2;Q04912	P08581;P08581-2	33;32;15;9;7;2;2;1;1;1;1;1;1;1;1;1	33;32;15;9;7;2;2;1;1;1;1;1;1;1;1;1	33;32;15;9;7;2;2;1;1;1;1;1;1;1;1;1	840830000	773370000	772430000	Hepatocyte growth factor receptor	MET	;	16	33	33	33	29	27	24	29	27	24	29	27	24	30.6	30.6	30.6	155.54	1390	1390;1408;764;260;214;158;190;270;285;363;488;505;536;542;1351;1400	1	341	0	94.174	27.7	24.7	22.2	817000000	981840000	926190000	709490000	20	15	11	178
P08621-2;P08621;P08621-3;M0QYR1;P08621-4;M0QX04	P08621-2;P08621;P08621-3	16;16;9;7;6;2	16;16;9;7;6;2	16;16;9;7;6;2	1383100000	1326800000	1310400000	U1 small nuclear ribonucleoprotein 70 kDa	SNRNP70	;;	6	16	16	16	14	14	14	14	14	14	14	14	14	31.1	31.1	31.1	50.617	428	428;437;166;94;341;33	1	220	0	56.776	30.6	27.3	27.3	1303900000	1669600000	1358700000	1276900000	14	9	8	120
P08648;H0YIV7	P08648	27;4	27;4	27;4	2329500000	2427800000	2357600000	Integrin alpha-5;Integrin alpha-5 heavy chain;Integrin alpha-5 light chain	ITGA5		2	27	27	27	23	22	24	23	22	24	23	22	24	40.1	40.1	40.1	114.54	1049	1049;119	1	395	0	235.33	32.7	33.7	35.7	2506300000	2777800000	2308700000	2552400000	23	17	21	255
P08651-4;P08651-5;P08651-3;P08651-6;P08651-2;P08651	P08651-4;P08651-5;P08651-3;P08651-6;P08651-2;P08651	4;4;4;4;4;4	4;4;4;4;4;4	3;3;3;3;3;3	0	76670000	58678000	Nuclear factor 1 C-type	NFIC	;;;;;	6	4	4	3	2	4	3	2	4	3	1	3	2	15.8	15.8	13.1	45.412	406	406;428;430;439;499;508	1	27	0	5.2891	10.6	15.8	7.9	63365000	73850000	101590000	59107000	1	0	1	12
P08670;B0YJC4;B0YJC5;Q5JVS8;H7C5W5;P41219;P41219-2;P14136-3;P14136;P14136-2;K7EKH6;F8W835;E7EMV2;E7ESP9;Q16352;P07197-2;P07196;P07197	P08670;B0YJC4;B0YJC5	37;35;19;11;4;4;4;2;2;2;1;1;1;1;1;1;1;1	34;32;17;11;2;2;2;1;1;1;1;1;1;1;1;1;1;1	31;29;16;11;2;2;2;1;1;1;1;1;0;0;0;0;0;0	4602200000	4238800000	4417100000	Vimentin	VIM	;;	18	37	34	31	36	32	34	33	29	31	30	27	28	77.9	74.5	69.7	53.651	466	466;431;228;173;200;470;471;431;432;438;191;207;698;877;499;541;543;916	1	551	0	260.83	76	71.9	73.8	4724000000	5014300000	4494900000	4669600000	34	33	27	367
P08754	P08754	14	7	7	280740000	253720000	299260000	Guanine nucleotide-binding protein G(k) subunit alpha	GNAI3		1	14	7	7	12	10	10	6	4	5	6	4	5	49.4	28	28	40.532	354	354	1	97	0	92.774	44.9	36.2	37	294580000	297140000	157700000	309150000	7	4	5	70
P08758;D6RBL5;D6RBE9;E9PHT9;D6RCN3	P08758;D6RBL5;D6RBE9	25;18;17;11;3	25;18;17;11;3	25;18;17;11;3	16032000000	16326000000	19059000000	Annexin A5;Annexin	ANXA5	;;	5	25	25	25	24	22	23	24	22	23	24	22	23	78.8	78.8	78.8	35.936	320	320;260;220;163;35	1	545	0	323.31	76.6	74.1	76.6	16369000000	16279000000	18179000000	19631000000	42	40	35	466
P09012;M0R268;M0R221;M0R2B8;M0QZG7;M0QXK2;M0R0G9	P09012;M0R268;M0R221;M0R2B8;M0QZG7;M0QXK2	12;10;7;7;7;6;4	12;10;7;7;7;6;4	10;8;6;6;6;5;3	683490000	736630000	735040000	U1 small nuclear ribonucleoprotein A	SNRPA	;;;;;	7	12	12	10	11	11	11	11	11	11	9	9	9	45.7	45.7	40.4	31.279	282	282;256;142;148;184;128;87	1	161	0	108.3	42.9	45.7	42.9	771660000	644950000	859420000	863300000	8	5	6	76
P09038-2;P09038-3;P09038-1;P09038	P09038-2;P09038-3;P09038-1;P09038	5;5;5;5	5;5;5;5	5;5;5;5	238580000	253370000	211440000	Fibroblast growth factor 2	FGF2	;;;	4	5	5	5	4	4	4	4	4	4	4	4	4	29.7	29.7	29.7	17.254	155	155;196;210;288	1	57	0	10.148	22.6	25.2	25.2	262300000	301830000	347470000	188410000	6	1	3	31
P09110;C9JDE9;H7C131;P09110-2;H0Y4D4;B4E072;B4DVF4;F2Z2Q6;F2Z3P7	P09110;C9JDE9;H7C131;P09110-2	15;13;12;9;6;5;3;1;1	15;13;12;9;6;5;3;1;1	15;13;12;9;6;5;3;1;1	325650000	308620000	332070000	3-ketoacyl-CoA thiolase, peroxisomal	ACAA1	;;;	9	15	15	15	10	11	8	10	11	8	10	11	8	61.3	61.3	61.3	44.292	424	424;383;290;331;237;126;153;113;121	1	137	0	92.52	41.3	45.8	38.7	351230000	453240000	285720000	249030000	3	6	6	60
P09132;P09132-2	P09132	4;1	4;1	4;1	119500000	102470000	125950000	Signal recognition particle 19 kDa protein	SRP19		2	4	4	4	2	3	2	2	3	2	2	3	2	45.8	45.8	45.8	16.156	144	144;110	1	47	0	24.355	20.1	28.5	20.1	157390000	113260000	121540000	112150000	0	2	1	23
[truncated: 2,442 more rows]
