# Supplementary material for: Trimming nano delivery at the cell side by tuning ARF6 GTPases to the GTP-bound form
Source: Research Square preprint supplement (doi:10.21203/rs.3.rs-1884888/v1), 2022-08-11
Supplement: Supplementary file 4 [file 9551d61dd9c6285a39dd7802.xlsx]

## Sheet: Table1
LFQ Proteomics identification (Search Result) of total cellular proteins of Hela cells after transfected with ARF6NC plasmids
Protein IDs	Majority protein IDs	Peptide counts (all)	Peptide counts (razor+unique)	Peptide counts (unique)	LFQ intensity NC-1	LFQ intensity NC-2	LFQ intensity NC-3	Protein names	Gene names	Fasta headers	Number of proteins	Peptides	Razor + unique peptides	Unique peptides	Peptides NC-1	Peptides NC-2	Peptides NC-3	Razor + unique peptides NC-1	Razor + unique peptides NC-2	Razor + unique peptides NC-3	Unique peptides NC-1	Unique peptides NC-2	Unique peptides NC-3	Sequence coverage [%]	Unique + razor sequence coverage [%]	Unique sequence coverage [%]	Mol. weight [kDa]	Sequence length	Sequence lengths	Fraction average	Fraction 1	Q-value	Score	Sequence coverage NC-1 [%]	Sequence coverage NC-2 [%]	Sequence coverage NC-3 [%]	Intensity	Intensity NC-1	Intensity NC-2	Intensity NC-3	MS/MS count NC-1	MS/MS count NC-2	MS/MS count NC-3	MS/MS count
A0AVT1;A0AVT1-2;A0AVT1-3;A0AVT1-4;H0Y8S8;H0Y9U5	A0AVT1;A0AVT1-2	33;21;11;10;9;1	33;21;11;10;9;1	33;21;11;10;9;1	1006400000	955550000	1042300000	Ubiquitin-like modifier-activating enzyme 6	UBA6	;	6	33	33	33	25	22	28	25	22	28	25	22	28	42.7	42.7	42.7	117.97	1052	1052;578;389;340;271;88	1	394	0	148.58	32.7	29.1	35.9	12710000000	921500000	800150000	942690000	16	17	19	183
A0MZ66;A0MZ66-3;A0MZ66-4;A0MZ66-6;A0MZ66-5;A0MZ66-8;A0MZ66-2;A0MZ66-7	A0MZ66;A0MZ66-3;A0MZ66-4;A0MZ66-6;A0MZ66-5;A0MZ66-8;A0MZ66-2	14;14;13;13;12;11;10;4	14;14;13;13;12;11;10;4	14;14;13;13;12;11;10;4	157210000	176830000	156770000	Shootin-1	KIAA1598	;;;;;;	8	14	14	14	9	7	8	9	7	8	9	7	8	29.6	29.6	29.6	71.639	631	631;649;558;601;571;498;456;219	1	107	0	31.07	18.7	15.7	18.5	1914600000	157510000	129660000	147460000	4	3	4	36
A1L0T0;M0R026;E9PJS0;E9PL44;M0QZX5;M0R1B5	A1L0T0;M0R026	11;9;4;3;3;2	11;9;4;3;3;2	11;9;4;3;3;2	188320000	187820000	204880000	Acetolactate synthase-like protein	ILVBL	;	6	11	11	11	8	8	7	8	8	7	8	8	7	30.7	30.7	30.7	67.867	632	632;525;262;166;229;165	1	133	0	38.709	21.5	22.9	17.1	2397800000	215840000	166750000	186470000	7	3	6	65
A1X283;G3V144;H0Y507;Q5TCZ1-3;Q5TCZ1	A1X283;G3V144	5;3;1;1;1	5;3;1;1;1	5;3;1;1;1	36531000	35038000	39446000	SH3 and PX domain-containing protein 2B	SH3PXD2B	;	5	5	5	5	2	2	3	2	2	3	2	2	3	6.4	6.4	6.4	101.58	911	911;430;1060;1105;1133	1	30	0.0012591	2.7415	2.5	2	3.4	330220000	15920000	17514000	38140000	1	1	2	12
A2A2Q9;Q9Y312	A2A2Q9;Q9Y312	5;5	5;5	5;5	25734000	0	0	Protein AAR2 homolog	AAR2	;	2	5	5	5	4	2	1	4	2	1	4	2	1	17.8	17.8	17.8	45.034	398	398;384	1	26	0	12.61	14.1	7.8	2.5	236950000	35264000	10268000	888670	2	0	0	9
A2A2V1;P04156-2;P04156;X6RKS3	A2A2V1;P04156-2;P04156;X6RKS3	2;2;2;1	2;2;2;1	2;2;2;1	34688000	31707000	36310000	Major prion protein	PRNP	;;;	4	2	2	2	2	2	2	2	2	2	2	2	2	9.6	9.6	9.6	27.278	249	249;246;253;217	1	24	0	5.3416	9.6	9.6	9.6	392430000	35593000	27491000	39350000	1	1	1	11
A2ACR1;P28065-2;P28065;A2ACR0;B4DZW2;A2ACQ9	A2ACR1;P28065-2;P28065;A2ACR0	6;6;6;4;2;2	6;6;6;4;2;2	6;6;6;4;2;2	282030000	241190000	217540000	Proteasome subunit beta type;Proteasome subunit beta type-9	PSMB9	;;;	6	6	6	6	5	6	4	5	6	4	5	6	4	41.8	41.8	41.8	20.96	196	196;209;219;131;154;178	1	62	0	24.581	35.7	41.8	32.1	3111800000	264400000	269680000	184120000	5	3	3	37
A2AEA2;P10321;F8W9Z8	A2AEA2;P10321	14;14;3	1;1;0	1;1;0	1303600000	541060000	1827900000	HLA class I histocompatibility antigen, Cw-7 alpha chain	HLA-C	;	3	14	1	1	14	13	12	1	1	1	1	1	1	40.9	4.3	4.3	41.301	372	372;366;131	1	127	0	29.846	40.9	39.5	39.5	17767000000	1407700000	627190000	2585800000	7	8	6	72
A2IDC6;Q4TT38;Q13084;A2IDC7;Q4TT37	A2IDC6;Q4TT38;Q13084;A2IDC7;Q4TT37	4;4;4;3;3	4;4;4;3;3	4;4;4;3;3	28804000	0	0	39S ribosomal protein L28, mitochondrial	MRPL28	;;;;	5	4	4	4	3	1	1	3	1	1	3	1	1	18.3	18.3	18.3	28.506	240	240;256;256;194;218	1	26	0.00315	2.317	12.9	3.8	3.8	359880000	43697000	28689000	13040000	1	1	1	11
A4D1E9;A4D1E9-2;C9J8R7;C9JNI1;C9JEQ8	A4D1E9;A4D1E9-2	5;4;2;2;2	5;4;2;2;2	5;4;2;2;2	46770000	42426000	0	GTP-binding protein 10	GTPBP10	;	5	5	5	5	5	3	4	5	3	4	5	3	4	17.3	17.3	17.3	42.932	387	387;308;210;236;242	1	52	0	13.909	17.3	7.2	11.6	491770000	49865000	24474000	34593000	0	1	0	12
A5YKK6;A5YKK6-2;A5YKK6-3;A5YKK6-4;B5MDN3;H3BMZ2;H3BVC9;H3BT18;H3BU44;H3BNB1;H3BR89;H3BMH0	A5YKK6;A5YKK6-2;A5YKK6-3;A5YKK6-4;B5MDN3	30;29;26;17;15;7;2;1;1;1;1;1	30;29;26;17;15;7;2;1;1;1;1;1	30;29;26;17;15;7;2;1;1;1;1;1	278040000	308670000	275310000	CCR4-NOT transcription complex subunit 1	CNOT1	;;;;	12	30	30	30	17	17	19	17	17	19	17	17	19	16.7	16.7	16.7	266.94	2376	2376;2371;2150;1551;1227;439;241;62;96;185;193;277	1	232	0	54.148	9.2	7.8	9.3	3491200000	243770000	245050000	305410000	10	7	6	83
A6NDG6;H3BV17	A6NDG6	13;2	13;2	13;2	559690000	507370000	545170000	Phosphoglycolate phosphatase	PGP		2	13	13	13	13	11	12	13	11	12	13	11	12	48.6	48.6	48.6	34.006	321	321;57	1	170	0	112.75	48.6	42.1	46.1	6497400000	632720000	456630000	454870000	12	6	9	103
A6NDU8	A6NDU8	5	5	5	103160000	87852000	99212000	UPF0600 protein C5orf51	C5orf51		1	5	5	5	3	4	4	3	4	4	3	4	4	26.5	26.5	26.5	33.62	294	294	1	40	0	14.691	13.3	21.1	21.1	1048500000	83937000	101370000	130610000	2	1	1	19
A6NEL0;P05114;A6NL93;F2Z2W6;F2Z2Y5;H7BXJ5	A6NEL0;P05114;A6NL93	4;4;3;1;1;1	4;4;3;1;1;1	4;4;3;1;1;1	132640000	175970000	139530000	Non-histone chromosomal protein HMG-14	HMGN1	;;	6	4	4	4	3	4	3	3	4	3	3	4	3	36.2	36.2	36.2	12.435	116	116;100;90;44;45;48	1	39	0	8.333	29.3	36.2	29.3	1490600000	127260000	183460000	121420000	1	2	1	19
A6NEM2;P51610-2;P51610;P51610-4;P51610-3;H7C1C4;Q9Y5Z7	A6NEM2;P51610-2;P51610;P51610-4	17;17;17;17;6;3;1	17;17;17;17;6;3;1	17;17;17;17;6;3;1	240990000	356370000	231850000	Host cell factor 1;HCF N-terminal chain 1;HCF N-terminal chain 2;HCF N-terminal chain 3;HCF N-terminal chain 4;HCF N-terminal chain 5;HCF N-terminal chain 6;HCF C-terminal chain 1;HCF C-terminal chain 2;HCF C-terminal chain 3;HCF C-terminal chain 4;HCF C-terminal chain 5;HCF C-terminal chain 6	HCFC1	;;;	7	17	17	17	12	11	13	12	11	13	12	11	13	12.4	12.4	12.4	213.47	2080	2080;1966;2035;2079;428;611;792	1	161	0	46.034	8.2	7.7	10	3482000000	253570000	276430000	249700000	5	4	4	62
A6NFX8;Q9UKK9;A6NJU6;A6NCQ0;H0YEY4;C9JYY9	A6NFX8;Q9UKK9;A6NJU6;A6NCQ0	14;14;10;8;5;3	14;14;10;8;5;3	14;14;10;8;5;3	1637000000	1546900000	1592600000	ADP-sugar pyrophosphatase	NUDT5	;;;	6	14	14	14	13	14	14	13	14	14	13	14	14	66.8	66.8	66.8	25.895	232	232;219;186;180;137;97	1	267	0	102.2	62.9	66.8	66.8	18592000000	1369400000	1501500000	1561700000	17	16	14	189
A6NG79;Q92733;H0YE12;H0Y679	A6NG79;Q92733;H0YE12;H0Y679	2;2;1;1	2;2;1;1	2;2;1;1	39474000	29545000	0	Proline-rich protein PRCC	PRCC	;;;	4	2	2	2	2	2	1	2	2	1	2	2	1	7	7	7	48.959	459	459;491;198;257	1	18	0	3.8262	7	7	4.6	291490000	35865000	29201000	19878000	2	0	0	8
A6NGP5;Q9H910;B4DLH4;H3BU16;H3BMV3;Q9H910-2;H3BMT0;H3BTV5;H3BMM8;B4E1P3	A6NGP5;Q9H910;B4DLH4;H3BU16;H3BMV3;Q9H910-2;H3BMT0;H3BTV5	5;5;5;4;4;4;3;3;2;2	5;5;5;4;4;4;3;3;2;2	5;5;5;4;4;4;3;3;2;2	112020000	96025000	105360000	Hematological and neurological expressed 1-like protein	HN1L	;;;;;;;	10	5	5	5	4	5	3	4	5	3	4	5	3	43.3	43.3	43.3	18.906	178	178;190;218;167;190;174;115;116;70;98	1	57	0	16.793	29.8	43.3	27.5	1369400000	102480000	115830000	71507000	4	3	1	36
A6NGW1;O95070;E9PIZ0;C9JST7;E9PS11	A6NGW1;O95070;E9PIZ0;C9JST7	4;4;3;3;1	4;4;3;3;1	4;4;3;3;1	108730000	123980000	123010000	Protein YIF1A	YIF1A	;;;	5	4	4	4	3	3	4	3	3	4	3	3	4	24.1	24.1	24.1	26.377	241	241;293;160;199;79	1	49	0	15.697	16.2	16.2	24.1	1366200000	107830000	116660000	157700000	1	1	1	22
A6NHR9;A6NHR9-2;J3KTL8;A6NHR9-3;J3KRK8;J3QSH1	A6NHR9;A6NHR9-2;J3KTL8;A6NHR9-3	16;15;12;10;1;1	16;15;12;10;1;1	16;15;12;10;1;1	139180000	140480000	171920000	Structural maintenance of chromosomes flexible hinge domain-containing protein 1	SMCHD1	;;;	6	16	16	16	12	10	6	12	10	6	12	10	6	9.9	9.9	9.9	226.37	2005	2005;1917;1388;762;49;150	1	118	0	25.937	7.2	5.6	3.1	1750700000	204990000	150490000	114740000	5	5	5	42
A6NLH6;Q9P003	A6NLH6;Q9P003	1;1	1;1	1;1	105760000	132590000	131390000	Protein cornichon homolog 4	CNIH4	;	2	1	1	1	1	1	1	1	1	1	1	1	1	14.6	14.6	14.6	15.771	137	137;139	1	36	0	24.982	14.6	14.6	14.6	1844800000	117420000	174260000	133440000	2	2	2	21
A6NMQ1;P09884	A6NMQ1;P09884	5;5	5;5	5;5	27377000	30109000	0	DNA polymerase;DNA polymerase alpha catalytic subunit	POLA1	;	2	5	5	5	4	4	1	4	4	1	4	4	1	5.1	5.1	5.1	166.46	1468	1468;1462	1	38	0	14.699	4	3.6	0.6	287140000	31344000	32389000	6638600	1	2	0	12
A6NMQ3;C9JUF4;Q5T5H1;O43768-2;O43768;O43768-9;O43768-3;O43768-4;O43768-6;O43768-5;O43768-7;O43768-8;H3BQ52	A6NMQ3;C9JUF4;Q5T5H1;O43768-2;O43768;O43768-9;O43768-3;O43768-4;O43768-6;O43768-5;O43768-7;O43768-8	7;7;7;7;7;7;7;7;5;5;5;4;1	7;7;7;7;7;7;7;7;5;5;5;4;1	6;6;6;6;6;6;6;6;4;4;4;4;0	315440000	393850000	332590000	Alpha-endosulfine	ENSA	;;;;;;;;;;;	13	7	7	6	7	7	6	7	7	6	6	6	5	52.1	52.1	44.3	15.634	140	140;144;187;117;121;133;137;140;113;117;133;105;71	1	103	0	17.862	52.1	52.1	40	4737300000	354820000	398670000	369610000	4	3	4	47
A6NNI4;G8JLH6;P21926;F5GXT1	A6NNI4;G8JLH6;P21926	3;3;3;1	3;3;3;1	3;3;3;1	235470000	193700000	254040000	Tetraspanin;CD9 antigen	CD9	;;	4	3	3	3	3	3	3	3	3	3	3	3	3	26.4	26.4	26.4	17.764	159	159;228;228;141	1	52	0	25.556	26.4	26.4	26.4	2776200000	202640000	221540000	244660000	1	3	2	36
A6NNK5;Q12888;Q12888-3;Q12888-2;C9JXV0	A6NNK5;Q12888;Q12888-3;Q12888-2;C9JXV0	2;2;2;2;1	2;2;2;2;1	2;2;2;2;1	118460000	128960000	130140000	Tumor suppressor p53-binding protein 1	TP53BP1	;;;;	5	2	2	2	2	2	2	2	2	2	2	2	2	1.4	1.4	1.4	209.02	1927	1927;1972;1975;1977;1033	1	30	0	3.9121	1.4	1.4	1.4	1483200000	117360000	108290000	115290000	0	1	1	9
A6PVN5;Q15257-2;Q15257;Q15257-3;B4DZF8;Q15257-4;Q5T949;Q5T948;A6PVN9;Q68CR8;A6PVN6;B7ZBQ0;A6PVN8;A6PVN7;C9IZ76;B7ZBP9;B7ZBP7;B4DDQ6;H0Y6E5	A6PVN5;Q15257-2;Q15257;Q15257-3;B4DZF8;Q15257-4;Q5T949;Q5T948;A6PVN9;Q68CR8	11;11;11;10;9;9;7;7;7;6;5;4;4;3;3;2;2;2;2	11;11;11;10;9;9;7;7;7;6;5;4;4;3;3;2;2;2;2	11;11;11;10;9;9;7;7;7;6;5;4;4;3;3;2;2;2;2	631950000	565740000	665290000	Serine/threonine-protein phosphatase 2A activator	PPP2R4;DKFZp781M17165	;;;;;;;;;	19	11	11	11	9	9	10	9	9	10	9	9	10	39.5	39.5	39.5	37.375	329	329;323;358;294;374;281;250;253;263;104;176;61;129;64;132;41;77;151;218	1	129	0	59.502	32.5	32.5	35.6	7201000000	649470000	547710000	754960000	6	7	6	83
A8MT72;Q16799-3;Q16799-2;Q16799	A8MT72;Q16799-3;Q16799-2;Q16799	2;2;2;2	2;2;2;2	2;2;2;2	519070000	564440000	633640000	Reticulon;Reticulon-1	RTN1	;;;	4	2	2	2	2	2	2	2	2	2	2	2	2	8.3	8.3	8.3	21.862	193	193;208;356;776	1	46	0.0029084	2.321	8.3	8.3	8.3	6034600000	541960000	490730000	579900000	2	3	3	28
A8MTY9;E7EWN9;B7Z6B1;O14972;A8MY26;B7Z606	A8MTY9;E7EWN9;B7Z6B1;O14972;A8MY26;B7Z606	3;3;3;3;2;2	3;3;3;3;2;2	3;3;3;3;2;2	26699000	31149000	28149000	Down syndrome critical region protein 3	DSCR3	;;;;;	6	3	3	3	3	2	2	3	2	2	3	2	2	17.3	17.3	17.3	27.958	249	249;253;270;297;172;220	1	29	0	4.7126	17.3	12.4	12.4	321610000	30571000	23740000	23760000	1	2	1	12
A8MUM1;Q53HC9;C9JVR6;F8WDX0;F8WB12;F8WDS8;C9J0U9;D3YTH5	A8MUM1;Q53HC9;C9JVR6	4;4;2;1;1;1;1;1	4;4;2;1;1;1;1;1	4;4;2;1;1;1;1;1	45616000	0	0	Protein TSSC1	TSSC1	;;	8	4	4	4	3	1	1	3	1	1	3	1	1	19.6	19.6	19.6	46.319	414	414;387;178;58;87;132;155;314	1	22	0	7.9276	15	3.1	3.1	369430000	50410000	15995000	15850000	2	0	0	8
A8MVQ8;O95749;C9J6G3;C9J7M1	A8MVQ8;O95749;C9J6G3;C9J7M1	3;3;2;2	3;3;2;2	3;3;2;2	26982000	0	0	Geranylgeranyl pyrophosphate synthase	GGPS1	;;;	4	3	3	3	3	1	2	3	1	2	3	1	2	15.9	15.9	15.9	28.423	246	246;300;230;242	1	28	0	6.4637	15.9	4.5	9.3	341130000	35597000	11715000	23576000	2	0	0	10
A8MVR0;Q9Y6Y0	A8MVR0;Q9Y6Y0	5;5	5;5	5;5	73760000	64804000	64429000	Influenza virus NS1A-binding protein	IVNS1ABP	;	2	5	5	5	3	4	3	3	4	3	3	4	3	18.4	18.4	18.4	46.759	424	424;642	1	47	0	12.385	10.1	15.8	11.3	876970000	47304000	66112000	57555000	1	2	1	24
A8MW61;O43660;O43660-2;H0YA24;D6RA26;H0YAA2;B7Z982	A8MW61;O43660;O43660-2	9;9;8;4;3;1;1	9;9;8;4;3;1;1	9;9;8;4;3;1;1	112700000	117430000	110390000	Pleiotropic regulator 1	PLRG1	;;	7	9	9	9	7	6	8	7	6	8	7	6	8	29.2	29.2	29.2	57.181	514	514;514;505;156;212;106;131	1	78	0	18.74	21	15.8	25.7	1340300000	113900000	100200000	140170000	5	2	2	28
A8MWK3;P19022;C9J8J8;P55283-2;P55283	A8MWK3;P19022	10;10;1;1;1	10;10;1;1;1	10;10;1;1;1	323070000	245670000	233820000	Cadherin-2	CDH2	;	5	10	10	10	5	6	6	5	6	6	5	6	6	23.4	23.4	23.4	97.039	875	875;906;191;842;916	1	91	0	48.592	11.3	14.6	15.9	3237900000	125790000	210400000	179700000	4	9	2	62
A8MXP9;P43243;D6REM6;D6R991;B3KM87;P43243-2;H0Y8T4;D6R8Z5;D6RAM9;D6RAY2;D6RCM3;D6REK4;D6RBI2;D6RE02;D6RIA2;D6RB45;D6RGW7;D6R9F3;D6RBS2;D6RBK5	A8MXP9;P43243;D6REM6;D6R991	20;20;17;13;9;9;8;3;2;2;2;2;2;2;2;1;1;1;1;1	20;20;17;13;9;9;8;3;2;2;2;2;2;2;2;1;1;1;1;1	20;20;17;13;9;9;8;3;2;2;2;2;2;2;2;1;1;1;1;1	998990000	967420000	961240000	Matrin-3	MATR3	;;;	20	20	20	20	14	19	17	14	19	17	14	19	17	32.4	32.4	32.4	99.966	895	895;847;794;433;509;559;334;107;81;86;99;100;109;124;172;47;77;78;87;121	1	287	0	67.895	21.6	31.3	28.5	12120000000	860020000	1050900000	1016600000	8	13	14	148
A8MYQ9;J3KQW8;Q9BZG1-4;Q9BZG1;Q9BZG1-2;C9JBG0;E7ES60;C9JY26;V9GY61;K7EJW7;K7EIF2;H7C0Y7;J3QLC6	A8MYQ9;J3KQW8;Q9BZG1-4;Q9BZG1;Q9BZG1-2;C9JBG0;E7ES60;C9JY26	7;7;7;7;6;5;5;4;3;3;3;3;2	7;7;7;7;6;5;5;4;3;3;3;3;2	7;7;7;7;6;5;5;4;3;3;3;3;2	123550000	84630000	98789000	Ras-related protein Rab-34	RAB34	;;;;;;;	13	7	7	7	6	4	6	6	4	6	6	4	6	30.8	30.8	30.8	29.2	260	260;316;237;259;251;210;268;258;48;51;149;171;156	1	73	0	12.116	26.9	17.7	25.4	1164000000	128310000	55513000	113830000	4	1	4	31
A8MZF9;P55039;J3KRL5;J3QR71;J3QRI9;J3QKW7;J3QL90;J3QKV7;J3QLF3	A8MZF9;P55039	7;7;3;3;3;3;2;2;1	7;7;3;3;3;3;2;2;1	7;7;3;3;3;3;2;2;1	81415000	64786000	107140000	Developmentally-regulated GTP-binding protein 2	DRG2	;	9	7	7	7	5	4	6	5	4	6	5	4	6	23.6	23.6	23.6	38.129	343	343;364;113;158;172;244;112;161;90	1	66	0	13.575	17.8	12	20.7	1221300000	57670000	55225000	127770000	1	0	2	18
A9Z1X7;E9PCT1;Q8IYB3-2;Q8IYB3;M0R088;B4DED5;M0R1E7;M0QXG5	A9Z1X7;E9PCT1;Q8IYB3-2;Q8IYB3;M0R088;B4DED5	4;4;4;4;3;2;1;1	4;4;4;4;3;2;1;1	4;4;4;4;3;2;1;1	159070000	177050000	175110000	Serine/arginine repetitive matrix protein 1	SRRM1	;;;;;	8	4	4	4	3	4	3	3	4	3	3	4	3	8.1	8.1	8.1	103.39	913	913;916;902;904;681;318;79;101	1	55	0	20.969	4.4	8.1	4.4	1941700000	138180000	149750000	199190000	2	4	4	33
B0FLL2;O60825;O60825-2;B4DI16;B4DY91;F2Z2I2;Q5W015;Q5VX20;Q16875-3;Q16875-2;Q16875;Q16875-4;H0Y483;Q4VBA9;B7Z5C3;Q66S35;P16118-2;Q5XLC2;Q64EX5;Q16877;P16118	B0FLL2;O60825;O60825-2;B4DI16;B4DY91	7;7;5;4;4;2;2;2;2;2;2;2;1;1;1;1;1;1;1;1;1	7;7;5;4;4;2;2;2;2;2;2;2;1;1;1;1;1;1;1;1;1	7;7;5;4;4;2;2;2;2;2;2;2;1;1;1;1;1;1;1;1;1	0	50558000	0	6-phosphofructo-2-kinase/fructose-2,6-bisphosphatase 2;6-phosphofructo-2-kinase;Fructose-2,6-bisphosphatase	PFKFB2	;;;;	21	7	7	7	4	4	5	4	4	5	4	4	5	16.5	16.5	16.5	54.777	472	472;505;471;264;373;455;513;526;500;514;520;534;143;271;458;462;406;434;435;469;471	1	49	0	4.15	8.7	8.1	11.9	474010000	33582000	35803000	56104000	0	1	1	8
B0QY89;Q9Y262;Q9Y262-2;B0QY90;C9JHP4;C9K0Q7;H7C3A0;H0Y7E6	B0QY89;Q9Y262;Q9Y262-2;B0QY90	21;21;20;16;6;6;4;3	21;21;20;16;6;6;4;3	21;21;20;16;6;6;4;3	1206500000	1247100000	1215500000	Eukaryotic translation initiation factor 3 subunit L	EIF3L	;;;	8	21	21	21	19	16	19	19	16	19	19	16	19	38.2	38.2	38.2	70.901	607	607;564;516;466;150;183;127;109	1	268	0	262.1	35.4	30	34.3	14153000000	1266200000	1099400000	1247800000	12	11	14	166
B0QYK0;Q01844-6;Q01844-3;Q01844;Q01844-5;C9JGE3;Q01844-2;H7BY36;Q01844-4	B0QYK0;Q01844-6;Q01844-3;Q01844;Q01844-5;C9JGE3;Q01844-2;H7BY36	6;6;6;6;6;5;5;4;1	6;6;6;6;6;5;5;4;1	6;6;6;6;6;5;5;4;1	382310000	306080000	296570000	RNA-binding protein EWS	EWSR1	;;;;;;;	9	6	6	6	4	5	6	4	5	6	4	5	6	13.6	13.6	13.6	64.929	618	618;600;655;656;661;583;583;308;354	1	99	0	115.2	11.2	12.6	13.6	4443100000	367170000	381790000	334850000	3	6	5	61
B1AH87;P30536	B1AH87;P30536	3;3	3;3	3;3	517540000	840810000	708990000	Translocator protein	TSPO	;	2	3	3	3	2	3	3	2	3	3	2	3	3	36.4	36.4	36.4	11.896	107	107;169	1	42	0	7.3964	15	36.4	36.4	7899400000	533290000	781730000	707890000	2	3	3	30
B1AHD1;P55769	B1AHD1;P55769	4;4	4;4	4;4	179000000	168300000	214820000	NHP2-like protein 1;NHP2-like protein 1, N-terminally processed	NHP2L1	;	2	4	4	4	4	4	3	4	4	3	4	4	3	32.6	32.6	32.6	14.627	132	132;128	1	47	0	62.514	32.6	32.6	26.5	2093900000	211990000	175570000	212060000	3	0	2	23
B1AJY5;B1AJY7;O75832;B1AJY6;O75832-2	B1AJY5;B1AJY7;O75832	8;8;8;3;3	8;8;8;3;3	8;8;8;3;3	213720000	224930000	214840000	26S proteasome non-ATPase regulatory subunit 10	PSMD10	;;	5	8	8	8	5	6	6	5	6	6	5	6	6	53.5	53.5	53.5	20.217	185	185;193;226;110;151	1	94	0	27.472	35.1	42.7	42.7	2454300000	223170000	216560000	212420000	2	6	4	48
B1AKD8;Q5TZA2;Q5TZA2-2	B1AKD8;Q5TZA2;Q5TZA2-2	5;5;3	5;5;3	5;5;3	622470000	812330000	656300000	Rootletin	CROCC	;;	3	5	5	5	2	3	2	2	3	2	2	3	2	3.2	3.2	3.2	149.06	1311	1311;2017;1313	1	46	0	6.3587	1.3	2	1.3	8478300000	552200000	714310000	583180000	2	1	1	19
B1AKJ5;O43847;O43847-2;G3V1R5;F5H7V1;H0Y5G9	B1AKJ5;O43847;O43847-2;G3V1R5;F5H7V1	32;32;32;30;20;12	32;32;32;30;20;12	32;32;32;30;20;12	1055100000	961590000	1005100000	Nardilysin	NRD1	;;;;	6	32	32	32	26	24	24	26	24	24	26	24	24	32.6	32.6	32.6	139.41	1219	1219;1150;1218;1087;747;538	1	369	0	174	27.6	23.9	23.7	12184000000	1155500000	906060000	907430000	23	14	17	208
B1AKJ6;J3KPA3;Q96SU4-7;Q96SU4-2;Q96SU4;Q96SU4-6;E9PJW9;Q96SU4-5;Q96SU4-4;Q96SU4-3;H0YE19;E9PKX6;H0YCW0;E9PJ80;E9PLH0;E9PNR1	B1AKJ6;J3KPA3;Q96SU4-7;Q96SU4-2;Q96SU4;Q96SU4-6;E9PJW9;Q96SU4-5;Q96SU4-4;Q96SU4-3	8;8;8;8;8;8;7;6;6;6;3;1;1;1;1;1	8;8;8;8;8;8;7;6;6;6;3;1;1;1;1;1	8;8;8;8;8;8;7;6;6;6;3;1;1;1;1;1	131940000	132270000	99633000	Oxysterol-binding protein;Oxysterol-binding protein-related protein 9	OSBPL9	;;;;;;;;;	16	8	8	8	7	4	5	7	4	5	7	4	5	12.1	12.1	12.1	83.785	741	741;754;719;723;736;746;655;558;571;626;196;32;34;41;92;109	1	76	0	18.026	10.9	6.6	8	1490400000	147480000	85959000	84051000	4	1	1	31
B1ALK7;B7Z6G2;Q14155-1;Q14155-5;Q14155-6;Q14155-2;Q14155-3;Q14155;E7EUY6;E9PDQ5;B7Z6D9;E7EU80	B1ALK7;B7Z6G2;Q14155-1;Q14155-5;Q14155-6;Q14155-2;Q14155-3;Q14155;E7EUY6;E9PDQ5	9;9;9;9;8;8;8;8;7;6;2;1	9;9;9;9;8;8;8;8;7;6;2;1	9;9;9;9;8;8;8;8;7;6;2;1	89722000	98632000	99740000	Rho guanine nucleotide exchange factor 7	ARHGEF7	;;;;;;;;;	12	9	9	9	4	4	7	4	4	7	4	4	7	15.7	15.7	15.7	79.831	705	705;721;646;731;625;753;782;803;447;547;181;151	1	63	0	16.556	6.8	6.8	11.2	1257200000	65979000	60131000	124980000	2	2	3	27
B1ALM5;Q9P0T7;B1ALM7;B1ALM8;B1ALM4;Q9NQ34-2;Q9NQ34	B1ALM5;Q9P0T7	3;3;1;1;1;1;1	3;3;1;1;1;1;1	3;3;1;1;1;1;1	67283000	70857000	72928000	Transmembrane protein 9	TMEM9	;	7	3	3	3	2	3	2	2	3	2	2	3	2	21	21	21	20.958	186	186;183;138;151;163;124;198	1	28	0	4.6831	10.8	21	10.8	837170000	59975000	74932000	65079000	1	1	1	11
B1AMU3;Q9Y3B2;R4GNH9;R4GMQ7;B1AMU7;B1AMU4	B1AMU3;Q9Y3B2;R4GNH9;R4GMQ7;B1AMU7;B1AMU4	4;4;3;3;3;3	4;4;3;3;3;3	4;4;3;3;3;3	49044000	43781000	38409000	Exosome complex component CSL4	EXOSC1	;;;;;	6	4	4	4	3	3	4	3	3	4	3	3	4	31.2	31.2	31.2	18.816	170	170;195;139;143;165;178	1	45	0	11.451	22.9	22.9	31.2	507820000	66457000	61047000	51691000	3	1	2	23
B1AMW1;P19256-2;P19256-3;P19256;H0YDI1	B1AMW1;P19256-2;P19256-3;P19256	3;3;3;3;1	3;3;3;3;1	3;3;3;3;1	91466000	78040000	115620000	Lymphocyte function-associated antigen 3	CD58	;;;	5	3	3	3	3	3	2	3	3	2	3	3	2	14.6	14.6	14.6	27.018	240	240;237;248;250;131	1	35	0	9.9574	14.6	14.6	9.6	1140600000	99635000	81125000	78019000	4	1	1	27
B1ANH0;Q16774-2;B1ANG9;Q16774;Q16774-3;B1ANH5;B1ANH2;B1ANH6;B1ANH3	B1ANH0;Q16774-2;B1ANG9;Q16774;Q16774-3;B1ANH5;B1ANH2;B1ANH6;B1ANH3	8;8;7;7;7;6;6;5;4	8;8;7;7;7;6;6;5;4	8;8;7;7;7;6;6;5;4	320610000	395380000	361160000	Guanylate kinase	GUK1	;;;;;;;;	9	8	8	8	8	7	8	8	7	8	8	7	8	53.9	53.9	53.9	23.711	217	217;218;218;197;241;199;253;242;272	1	113	0	21.786	53.9	48.8	53.9	4216400000	221960000	378520000	407250000	5	3	4	52
B1APY4;Q01974	B1APY4;Q01974	7;7	7;7	7;7	0	17089000	16854000	Tyrosine-protein kinase transmembrane receptor ROR2	ROR2	;	2	7	7	7	3	3	4	3	3	4	3	3	4	13.4	13.4	13.4	79.27	704	704;943	1	37	0	6.413	5.1	6.1	8.9	378720000	49406000	10179000	26700000	1	0	2	6
B1AVQ5;P15941-4;P15941-3;P15941;P15941-2;P15941-7;P15941-17;P15941-11;P15941-8;B1AVQ7;P15941-15;P15941-6;P15941-12;P15941-16;P15941-9;P15941-13;P15941-10;V9GZ38;P15941-5	B1AVQ5;P15941-4;P15941-3;P15941;P15941-2;P15941-7;P15941-17;P15941-11;P15941-8;B1AVQ7;P15941-15;P15941-6	7;7;7;7;7;6;6;6;6;5;4;4;3;3;3;3;3;1;1	7;7;7;7;7;6;6;6;6;5;4;4;3;3;3;3;3;1;1	7;7;7;7;7;6;6;6;6;5;4;4;3;3;3;3;3;1;1	718600000	828870000	805820000	Mucin-1;Mucin-1 subunit alpha;Mucin-1 subunit beta	MUC1	;;;;;;;;;;;	19	7	7	7	7	7	7	7	7	7	7	7	7	20.2	20.2	20.2	49.224	475	475;1243;1252;1255;1264;255;259;264;273;229;224;230;159;166;168;198;203;251;1087	1	135	0	87.764	20.2	20.2	20.2	9829900000	762540000	799970000	788590000	6	8	8	80
B2WTI3;B2WTI4;K7EJU9;Q6NYC1-2;Q6NYC1;Q6NYC1-3	B2WTI3;B2WTI4;K7EJU9;Q6NYC1-2;Q6NYC1;Q6NYC1-3	6;6;6;6;6;6	6;6;6;6;6;6	6;6;6;6;6;6	78177000	70744000	80359000	Bifunctional arginine demethylase and lysyl-hydroxylase JMJD6	JMJD6	;;;;;	6	6	6	6	4	3	4	4	3	4	4	3	4	26	26	26	39.241	335	335;361;395;372;403;414	1	56	0	35.167	18.8	15.8	20	994920000	71416000	57779000	91463000	3	4	5	43
B3KMG4;Q9HCJ1	B3KMG4;Q9HCJ1	2;2	2;2	2;2	0	15959000	0	Progressive ankylosis protein homolog	ANKH	;	2	2	2	2	1	2	1	1	2	1	1	2	1	7.1	7.1	7.1	32.259	294	294;492	1	15	0.00026076	3.2138	3.1	7.1	3.1	80437000	6028100	15769000	1534800	1	1	1	10
B3KRB7;O14920-4;O14920-2;O14920;E5RGW5;G3V105	B3KRB7;O14920-4;O14920-2;O14920	3;3;3;3;1;1	3;3;3;3;1;1	3;3;3;3;1;1	0	37053000	27618000	Inhibitor of nuclear factor kappa-B kinase subunit beta	IKBKB	;;;	6	3	3	3	1	2	2	1	2	2	1	2	2	6.2	6.2	6.2	60.819	533	533;697;754;756;375;562	1	23	0.00025582	2.9242	1.7	4.1	4.1	376570000	8981400	24012000	13054000	1	1	1	8
B3KS98;O15372;E5RJT0;E5RGU4;E5RFW7;E5RFH0;E5RHC7;E5RH59	B3KS98;O15372	15;15;7;4;3;3;2;2	15;15;7;4;3;3;2;2	15;15;7;4;3;3;2;2	852460000	1015800000	904730000	Eukaryotic translation initiation factor 3 subunit H	EIF3H	;	8	15	15	15	13	14	13	13	14	13	13	14	13	43.7	43.7	43.7	41.581	366	366;352;244;235;97;170;46;56	1	222	0	76.477	35.8	39.1	35.8	10523000000	812410000	1040700000	840030000	9	11	7	104
B3KSH1;O00303;B4DEW9;H0YDT6;E9PQV8	B3KSH1;O00303;B4DEW9	13;13;11;4;1	13;13;11;4;1	13;13;11;4;1	1456200000	1353300000	1354800000	Eukaryotic translation initiation factor 3 subunit F	EIF3F	;;	5	13	13	13	13	12	11	13	12	11	13	12	11	47.6	47.6	47.6	39.146	372	372;357;208;100;124	1	189	0	123.79	47.6	42.5	37.6	16646000000	1355000000	1079500000	1107100000	12	13	9	125
B3KWN8;Q8WU10;B4DEW4	B3KWN8;Q8WU10;B4DEW4	4;4;2	4;4;2	4;4;2	20326000	0	0	Pyridine nucleotide-disulfide oxidoreductase domain-containing protein 1	PYROXD1	;;	3	4	4	4	4	0	3	4	0	3	4	0	3	12.8	12.8	12.8	48.338	429	429;500;139	1	27	0	6.0968	12.8	0	9.8	289330000	26597000	0	37848000	1	0	0	6
B3KXE0;P32780;F5H0Y9;E9PM51	B3KXE0;P32780;F5H0Y9;E9PM51	2;2;1;1	2;2;1;1	2;2;1;1	8793800	0	0	General transcription factor IIH subunit 1	GTF2H1	;;;	4	2	2	2	1	0	0	1	0	0	1	0	0	6.5	6.5	6.5	48.738	432	432;548;138;236	1	10	0	3.9745	3.9	0	0	46919000	8770000	0	0	1	0	0	4
B3KY94;O14735-3;O14735;H3BUR9	B3KY94;O14735-3;O14735	4;4;4;1	4;4;4;1	4;4;4;1	114530000	159270000	171910000	CDP-diacylglycerol--inositol 3-phosphatidyltransferase	CDIPT	;;	4	4	4	4	3	3	3	3	3	3	3	3	3	19.8	19.8	19.8	25.946	237	237;168;213;157	1	54	0	8.9376	15.6	15.6	15.6	1665800000	105390000	120100000	134310000	5	2	1	28
B4DDF4;B4DUT8;Q99439;Q99439-2;H3BVI6;K7ES69;H3BQH0;U3KPS3	B4DDF4;B4DUT8;Q99439;Q99439-2;H3BVI6	13;13;13;10;8;6;4;2	13;13;13;10;8;6;4;2	12;12;12;9;8;5;4;2	958700000	835810000	783010000	Calponin;Calponin-2	CNN2	;;;;	8	13	13	12	11	12	10	11	12	10	10	11	9	59.1	59.1	55.4	32.616	298	298;330;309;270;218;148;154;103	1	164	0	220.56	49.7	55.4	40.6	10700000000	1083500000	764080000	905530000	11	10	4	103
B4DEX5;F6QUN3;H0Y4B0;O43414-3;O43414-2;O43414;F6UGJ8	B4DEX5;F6QUN3;H0Y4B0;O43414-3;O43414-2;O43414;F6UGJ8	2;2;2;2;2;2;1	2;2;2;2;2;2;1	2;2;2;2;2;2;1	56043000	51150000	0	ERI1 exoribonuclease 3	PRNPIP;ERI3	;;;;;;	7	2	2	2	2	2	1	2	2	1	2	2	1	17.5	17.5	17.5	18.185	160	160;176;204;128;222;337;250	1	29	0	8.0075	17.5	17.5	11.9	577180000	57469000	36221000	17424000	2	1	1	16
B4DF47;Q9BUK6-5;Q9BUK6-7;Q9BUK6-3;Q9BUK6-2;Q9BUK6	B4DF47;Q9BUK6-5;Q9BUK6-7;Q9BUK6-3;Q9BUK6-2;Q9BUK6	3;3;3;3;3;3	3;3;3;3;3;3	3;3;3;3;3;3	0	24523000	23707000	Protein misato homolog 1	MSTO1	;;;;;	6	3	3	3	3	2	3	3	2	3	3	2	3	11.1	11.1	11.1	34.737	315	315;391;524;558;569;570	1	25	0	3.8995	11.1	6.7	11.1	226290000	27702000	24698000	26915000	0	1	1	7
B4DFL2;P48735;B4DSZ6;H0YL11	B4DFL2;P48735;B4DSZ6	10;10;6;4	10;10;6;4	10;10;6;4	105820000	91661000	85113000	Isocitrate dehydrogenase [NADP], mitochondrial	IDH2	;;	4	10	10	10	9	8	9	9	8	9	9	8	9	27.8	27.8	27.8	45.179	400	400;452;322;312	1	85	0	14.262	25.2	22	25	1146100000	141090000	85605000	104610000	3	3	1	31
B4DFQ4;Q8N668	B4DFQ4;Q8N668	2;2	2;2	2;2	28525000	34996000	36298000	COMM domain-containing protein 1	COMMD1	;	2	2	2	2	2	2	2	2	2	2	2	2	2	22	22	22	17.665	159	159;190	1	25	0	4.6413	22	22	22	405790000	28433000	31261000	34698000	1	1	1	12
B4DGL8;O75027;O75027-2;O75027-3;E9PJR8;E9PNQ5	B4DGL8;O75027;O75027-2;O75027-3	5;5;5;4;2;1	5;5;5;4;2;1	5;5;5;4;2;1	67536000	52763000	60507000	ATP-binding cassette sub-family B member 7, mitochondrial	ABCB7	;;;	6	5	5	5	5	3	4	5	3	4	5	3	4	9	9	9	77.12	702	702;752;753;712;188;171	1	42	0	14.894	9	5.6	7.3	618420000	81682000	48219000	67688000	2	3	2	20
B4DGU4;P35222	B4DGU4;P35222	11;11	6;6	6;6	125080000	102100000	123280000	Catenin beta-1	CTNNB1	;	2	11	6	6	10	10	11	5	5	6	5	5	6	17.4	10.3	10.3	84.765	774	774;781	1	91	0	19.219	15.1	15.1	17.4	1492000000	107930000	117580000	151860000	4	3	2	32
B4DGX2;P48426;H7BXS3;S4R320;Q5JUT3	B4DGX2;P48426;H7BXS3	4;4;3;1;1	3;3;2;1;1	3;3;2;1;1	21392000	33486000	33350000	Phosphatidylinositol 5-phosphate 4-kinase type-2 alpha	PIP4K2A	;;	5	4	3	3	4	4	3	3	3	2	3	3	2	16.4	11.5	11.5	39.802	347	347;406;266;142;215	1	28	0.0024631	2.5108	16.4	16.4	13.5	323470000	27963000	30893000	25876000	2	1	1	8
B4DH53;Q66K74;M0R1M7;M0QXQ9;M0QY41;M0QZ50;M0R1J2	B4DH53;Q66K74	13;13;3;2;2;1;1	13;13;3;2;2;1;1	13;13;3;2;2;1;1	188070000	152280000	184070000	Microtubule-associated protein 1S;MAP1S heavy chain;MAP1S light chain	MAP1S	;	7	13	13	13	9	9	11	9	9	11	9	9	11	16.1	16.1	16.1	109.79	1033	1033;1059;120;185;189;93;188	1	127	0	27.474	10.8	10.5	12.9	2303100000	188320000	151010000	206710000	3	0	3	27
B4DHE8;Q96DH6-2;Q96DH6;J3KTC1;J3QKT5;B4DM51;Q96DH6-3;H0YHB7;O43347	B4DHE8;Q96DH6-2;Q96DH6;J3KTC1;J3QKT5;B4DM51;Q96DH6-3	6;6;6;5;3;3;3;1;1	6;6;6;5;3;3;3;1;1	6;6;6;5;3;3;3;1;1	118950000	116220000	123420000	RNA-binding protein Musashi homolog 2	MSI2	;;;;;;	9	6	6	6	5	5	6	5	5	6	5	5	6	23.8	23.8	23.8	34.812	324	324;251;328;140;99;267;151;233;362	1	71	0	19.037	18.8	20.1	23.8	1512000000	99102000	105090000	131010000	2	2	1	18
B4DJP7;P62318;H3BT13	B4DJP7;P62318;H3BT13	4;4;2	4;4;2	4;4;2	1130500000	1132300000	1317700000	Small nuclear ribonucleoprotein Sm D3	SNRPD3	;;	3	4	4	4	4	4	4	4	4	4	4	4	4	50	50	50	13.291	120	120;126;62	1	116	0	133.17	50	50	50	14330000000	1132700000	1121800000	1323500000	9	7	7	99
B4DJV2;O75390;H0YIC4;F8VPA1;H0YH82;F8VRI6;F8VPF9;F8VR34;F8VTT8;F8W1S4;F8W4S1;F8VRP1;F8VX68;F8W642;F8VZK9;F8VX07;F8VWQ5;F8VU34;F8W0J2	B4DJV2;O75390	18;18;7;5;5;4;4;4;4;4;4;3;3;2;2;2;2;2;1	18;18;7;5;5;4;4;4;4;4;4;3;3;2;2;2;2;2;1	17;17;7;5;5;4;4;3;3;4;3;3;3;2;2;2;1;1;0	2549900000	2580400000	2411300000	Citrate synthase;Citrate synthase, mitochondrial	CS	;	19	18	18	17	15	16	14	15	16	14	14	15	13	52.5	52.5	50.6	50.431	453	453;466;123;144;190;140;140;146;149;157;178;117;120;66;80;114;132;142;75	1	299	0	114.99	41.3	49.9	37.3	30480000000	2537700000	2816200000	2101500000	19	18	9	188
B4DKB2;P42892-3;P42892-2;P42892-4;P42892;E9PJG1;E9PHZ1	B4DKB2;P42892-3;P42892-2;P42892-4;P42892	24;24;24;24;24;2;1	24;24;24;24;24;2;1	24;24;24;24;24;2;1	1333900000	1219000000	1355900000	Endothelin-converting enzyme 1	ECE1	;;;;	7	24	24	24	22	20	17	22	20	17	22	20	17	40.4	40.4	40.4	83.573	738	738;754;758;767;770;77;134	1	386	0	190.56	37.4	36	30.6	16376000000	1558200000	1077500000	1209400000	27	16	17	245
B4DKR0;Q13190-3;Q13190-2;Q13190-4;Q13190;H7C3X5;E9PNU4	B4DKR0;Q13190-3;Q13190-2;Q13190-4;Q13190;H7C3X5;E9PNU4	5;5;5;5;5;4;3	5;5;5;5;5;4;3	5;5;5;5;5;4;3	159580000	175480000	161820000	Syntaxin-5	STX5A;STX5	;;;;;;	7	5	5	5	5	4	5	5	4	5	5	4	5	32	32	32	29.233	259	259;267;301;321;355;158;250	1	62	0	52.377	32	27.4	32	1972600000	145710000	196930000	133660000	3	6	3	42
B4DKY1;P49589-2;P49589;P49589-3;A8MVQ3;C9JLN0;E9PRS8;E9PLP0	B4DKY1;P49589-2;P49589;P49589-3;A8MVQ3	16;16;16;16;14;2;2;2	16;16;16;16;14;2;2;2	16;16;16;16;14;2;2;2	309970000	284040000	313240000	Cysteine--tRNA ligase, cytoplasmic	CARS	;;;;	8	16	16	16	11	10	12	11	10	12	11	10	12	25.3	25.3	25.3	84.277	739	739;726;748;831;738;45;76;128	1	161	0	98.106	18.4	16.1	18.7	3625200000	274240000	226100000	309920000	7	5	5	83
B4DLR2;Q12884;Q12884-2;H7C4D9	B4DLR2;Q12884	6;6;2;1	6;6;2;1	6;6;2;1	37182000	43143000	44782000	Prolyl endopeptidase FAP;Antiplasmin-cleaving enzyme FAP, soluble form	FAP	;	4	6	6	6	5	4	3	5	4	3	5	4	3	8.6	8.6	8.6	84.861	735	735;760;239;25	1	49	0	8.0611	6.7	4.9	3.8	510590000	49535000	38562000	33357000	1	1	2	14
B4DMQ3;Q9BW27;J3QL54;J3KT10;B4DPW1;J3QLD4;J3QLH0;J3QLV0;F5H0W7;J3QL91;J3KSH3;J3KRC0	B4DMQ3;Q9BW27;J3QL54;J3KT10;B4DPW1;J3QLD4;J3QLH0	7;7;6;6;5;4;4;3;3;1;1;1	7;7;6;6;5;4;4;3;3;1;1;1	7;7;6;6;5;4;4;3;3;1;1;1	57238000	0	0	Nuclear pore complex protein Nup85	NUP85	;;;;;;	12	7	7	7	5	3	3	5	3	3	5	3	3	15.1	15.1	15.1	69.799	610	610;656;544;611;462;272;302;191;259;114;120;169	1	52	0	11.964	11	6.1	5.4	609670000	57598000	27430000	27281000	1	1	1	11
B4DNM9;O15228;Q5TBH8	B4DNM9;O15228;Q5TBH8	5;5;4	5;5;4	5;5;4	59513000	0	44685000	Dihydroxyacetone phosphate acyltransferase	GNPAT	;;	3	5	5	5	5	3	3	5	3	3	5	3	3	14.1	14.1	14.1	69.906	619	619;680;587	1	38	0	4.8405	14.1	8.2	8.9	517700000	70671000	41000000	30055000	2	0	0	8
B4DNW0;Q03154;F8WC59;C9JYZ0;C9JMV9;Q03154-2;Q03154-3;Q03154-4	B4DNW0;Q03154;F8WC59;C9JYZ0;C9JMV9;Q03154-2;Q03154-3;Q03154-4	3;3;2;2;2;2;2;2	3;3;2;2;2;2;2;2	3;3;2;2;2;2;2;2	31360000	0	0	Aminoacylase-1	ACY1;ABHD14A-ACY1	;;;;;;;	8	3	3	3	2	1	0	2	1	0	2	1	0	10.4	10.4	10.4	55.994	498	498;408;201;228;509;336;343;373	1	15	0.00026171	3.2599	8.6	4	0	626270000	19902000	95163000	0	2	0	0	4
B4DQ14;Q9BY44;F8WAE5;B4DF96;Q9BY44-2;H7C5R5;C9IZE1;H7C5Q3;F8WF18;F8WAT3	B4DQ14;Q9BY44;F8WAE5;B4DF96;Q9BY44-2	21;21;20;18;12;9;8;5;1;1	21;21;20;18;12;9;8;5;1;1	21;21;20;18;12;9;8;5;1;1	1006800000	1024800000	958840000	Eukaryotic translation initiation factor 2A;Eukaryotic translation initiation factor 2A, N-terminally processed	EIF2A	;;;;	10	21	21	21	19	17	18	19	17	18	19	17	18	48.9	48.9	48.9	62.288	560	560;585;580;524;371;316;236;158;59;75	1	280	0	51.695	44.3	43.4	46.8	11927000000	919590000	945470000	981140000	11	9	7	91
B4DQJ8;P52209;F5H7U0;K7EM49;K7EPF6;K7EMN2;K7ELN9	B4DQJ8;P52209;F5H7U0	25;25;24;10;10;8;8	25;25;24;10;10;8;8	25;25;24;10;10;8;8	8614100000	8040100000	8071300000	6-phosphogluconate dehydrogenase, decarboxylating	PGD	;;	7	25	25	25	22	23	23	22	23	23	22	23	23	66	66	66	51.872	470	470;483;461;205;256;160;224	1	478	0	323.31	56	60.6	57.4	102910000000	8275200000	7974500000	7766600000	31	31	28	367
B4DR61;P61619;P61619-3;F8W776;Q8TC24;Q9H9S3-2;Q9H9S3-3;Q9H9S3;H7C1Q9;H7C069;A6NK38;F2Z2C7;A6NIF9;C9JJV4	B4DR61;P61619;P61619-3	9;9;5;4;4;4;4;4;3;3;3;3;3;3	9;9;5;4;4;4;4;4;3;3;3;3;3;3	6;6;5;1;1;1;1;1;0;0;0;0;0;0	1092900000	977790000	932900000	Protein transport protein Sec61 subunit alpha isoform 1	SEC61A1	;;	14	9	9	6	7	6	6	7	6	6	4	4	4	23.9	23.9	15.4	52.949	482	482;476;357;410;418;437;454;476;94;145;159;162;168;189	1	101	0	100.65	17.4	12.2	12.2	12818000000	1166800000	910040000	800350000	3	3	4	49
B4DR80;Q9Y6E0-2;Q9Y6E0;H0Y630;Q5JV99;Q5JV98	B4DR80;Q9Y6E0-2;Q9Y6E0;H0Y630	11;11;10;8;5;4	11;11;10;8;5;4	6;6;5;4;3;2	221200000	183500000	195400000	Serine/threonine-protein kinase 24;Serine/threonine-protein kinase 24 36 kDa subunit;Serine/threonine-protein kinase 24 12 kDa subunit	STK24	;;;	6	11	11	6	9	6	6	9	6	6	5	4	4	34	34	23.3	45.835	412	412;431;443;369;142;209	1	95	0	98.442	28.9	20.1	20.1	2515600000	247280000	171400000	189990000	4	0	1	37
B4DRL9;P24386	B4DRL9;P24386	2;2	2;2	2;2	34230000	29328000	0	Rab proteins geranylgeranyltransferase component A 1	CHM	;	2	2	2	2	2	2	1	2	2	1	2	2	1	5.5	5.5	5.5	57.264	505	505;653	1	19	0	8.2788	5.5	5.5	3.8	346530000	33588000	23556000	13563000	1	0	0	7
B4DT77;P20073-2;P20073	B4DT77;P20073-2;P20073	21;21;21	21;21;21	21;21;21	1645300000	1636600000	1703500000	Annexin;Annexin A7	ANXA7	;;	3	21	21	21	19	17	19	19	17	19	19	17	19	61.6	61.6	61.6	37.805	336	336;466;488	1	288	0	120.67	58.6	54.2	58.9	20189000000	1730500000	1418600000	1970800000	15	17	18	183
B4DTG6;Q8ND56-2;Q8ND56;K7EMZ9;I3L4Q1	B4DTG6;Q8ND56-2;Q8ND56;K7EMZ9	5;5;5;4;1	5;5;5;4;1	5;5;5;4;1	108880000	96553000	81562000	Protein LSM14 homolog A	LSM14A	;;;	5	5	5	5	5	5	4	5	5	4	5	5	4	15.9	15.9	15.9	46.411	422	422;463;463;333;102	1	57	0	11.572	15.9	15.9	14	1101300000	102280000	79656000	67375000	3	2	0	14
B4DUX5;P50579;F8VRR3;F8VQZ7;G3XA91;G3V1U3;F8VSC4;F8VZX9;F8VY03	B4DUX5;P50579;F8VRR3;F8VQZ7;G3XA91	12;12;10;10;10;4;2;1;1	12;12;10;10;10;4;2;1;1	12;12;10;10;10;4;2;1;1	394880000	466260000	476560000	Methionine aminopeptidase 2	METAP2	;;;;	9	12	12	12	12	6	9	12	6	9	12	6	9	34.1	34.1	34.1	50.496	455	455;478;442;477;455;328;161;163;178	1	138	0	60.563	34.1	18	29	5428600000	490820000	352690000	497930000	6	4	7	75
B4DVD8;G3V169;P29466-2;P29466;H0YEC7;P29466-4;P29466-3;E9PQW1;Q5FBZ0;Q5EG05-2;Q5EG05	B4DVD8;G3V169;P29466-2;P29466;H0YEC7;P29466-4;P29466-3	3;3;3;3;2;2;2;1;1;1;1	3;3;3;3;2;2;2;1;1;1;1	3;3;3;3;2;2;2;1;1;1;1	27949000	0	0	Caspase;Caspase-1;Caspase-1 subunit p20;Caspase-1 subunit p10	CASP1	;;;;;;	11	3	3	3	3	0	1	3	0	1	3	0	1	15	15	15	33.009	301	301;367;383;404;236;263;311;95;110;97;197	1	18	0	8.6119	15	0	3	192710000	32608000	0	8450500	1	0	0	4
B4DVN3;E7ESC7;Q7L5Y9-3;Q7L5Y9-2;Q7L5Y9;D6RDW4;D6REW7;D6RIB6;B4DQT1;Q7L5Y9-5;Q7L5Y9-4;D6RID6;D6RE80;E7ENL1;D6RA86	B4DVN3;E7ESC7;Q7L5Y9-3;Q7L5Y9-2;Q7L5Y9;D6RDW4;D6REW7;D6RIB6;B4DQT1;Q7L5Y9-5;Q7L5Y9-4;D6RID6;D6RE80;E7ENL1	4;4;4;4;4;3;3;3;3;3;3;2;2;2;1	4;4;4;4;4;3;3;3;3;3;3;2;2;2;1	4;4;4;4;4;3;3;3;3;3;3;2;2;2;1	18845000	19624000	0	Macrophage erythroblast attacher	MAEA	;;;;;;;;;;;;;	15	4	4	4	3	2	2	3	2	2	3	2	2	11.1	11.1	11.1	45.073	395	395;434;355;360;396;245;274;328;348;245;328;115;183;317;107	1	26	0.00076007	2.821	8.9	5.3	4.3	179710000	24252000	14610000	8666000	2	0	0	5
B4DWW1;P40616;F8VYN9;B4DZG7;F8VP99;F8W1Z8;F8VP63	B4DWW1;P40616;F8VYN9;B4DZG7	6;6;5;4;1;1;1	6;6;5;4;1;1;1	6;6;5;4;1;1;1	322630000	324880000	309190000	ADP-ribosylation factor-like protein 1	ARL1	;;;	7	6	6	6	5	5	5	5	5	5	5	5	5	57.9	57.9	57.9	18.565	164	164;181;194;135;17;52;64	1	87	0	28.541	48.2	48.2	48.2	3737700000	320320000	293920000	279410000	4	7	4	65
B4DXZ6;P51114;P51114-2;E9PFF5;P51114-3;E7EU85;C9JZE0;C9JY20;C9JAJ4;C9IZ22;C9J5B4;H7C4S4	B4DXZ6;P51114;P51114-2;E9PFF5;P51114-3;E7EU85	15;15;14;12;12;11;4;4;4;2;1;1	15;15;14;12;12;11;4;4;4;2;1;1	13;13;12;10;10;9;4;4;4;2;1;1	245980000	314920000	279760000	Fragile X mental retardation syndrome-related protein 1	FXR1	;;;;;	12	15	15	13	9	11	12	9	11	12	8	10	10	33.6	33.6	30.9	68.326	608	608;621;539;490;536;454;119;123;151;94;75;246	1	135	0	46.846	18.4	24	26	3729600000	181360000	270300000	322490000	2	4	5	60
B4DZI8;P35606;D6RBT6;D6R997;D6RBZ7;D6RCL6;D6RBG7;H0Y938;H0YAC7	B4DZI8;P35606	38;38;6;6;5;5;5;3;2	38;38;6;6;5;5;5;3;2	38;38;6;6;5;5;5;3;2	2029000000	2074700000	2153200000	Coatomer subunit beta	COPB2	;	9	38	38	38	30	30	31	30	30	31	30	30	31	57.7	57.7	57.7	99.045	877	877;906;111;152;77;86;89;177;118	1	472	0	205.26	47.9	45.6	44.9	25002000000	2165500000	1945100000	2303700000	27	22	20	286
B4E1D7;Q9NVS9;B4E0V0;B4E152;J3QQV6	B4E1D7;Q9NVS9;B4E0V0;B4E152	6;6;5;5;2	6;6;5;5;2	6;6;5;5;2	103590000	99727000	96145000	Pyridoxine-5-phosphate oxidase	PNPO	;;;	5	6	6	6	5	4	4	5	4	4	5	4	4	35.4	35.4	35.4	27.822	243	243;261;166;218;120	1	70	0	30.081	29.2	20.6	20.6	1218500000	117000000	114580000	76848000	4	3	3	35
B4E1G1;Q9BUN8-2;Q9BUN8;E5RGY0	B4E1G1;Q9BUN8-2;Q9BUN8	3;3;3;1	3;3;3;1	3;3;3;1	72359000	77825000	76654000	Derlin-1	DERL1	;;	4	3	3	3	3	3	3	3	3	3	3	3	3	21.9	21.9	21.9	17.033	151	151;231;251;151	1	39	0	15.694	21.9	21.9	21.9	879660000	90054000	94146000	106160000	3	1	0	16
B4E1J0;F5H2F6;Q96AQ6-2;Q96AQ6;Q96AQ6-3;Q5T173	B4E1J0;F5H2F6;Q96AQ6-2;Q96AQ6;Q96AQ6-3	14;14;14;14;10;2	14;14;14;14;10;2	14;14;14;14;10;2	311200000	296360000	286220000	Pre-B-cell leukemia transcription factor-interacting protein 1	PBXIP1	;;;;	6	14	14	14	12	10	13	12	10	13	12	10	13	32.8	32.8	32.8	62.667	558	558;576;702;731;662;315	1	147	0	55.804	29	21.3	29.9	3745700000	289620000	265820000	393990000	9	3	8	57
B4E241;P84103	B4E241;P84103	7;7	6;6	6;6	749780000	543210000	545340000	Serine/arginine-rich splicing factor 3	SRSF3	;	2	7	6	6	6	6	5	5	5	4	5	5	4	46.8	46.8	46.8	14.203	124	124;164	1	60	0	11.357	46.8	46.8	37.1	6350400000	541450000	498260000	522830000	4	2	2	34
B4E2S7;P13473-2;P13473;P13473-3;B7Z2R9;H0YCG2	B4E2S7;P13473-2;P13473;P13473-3;B7Z2R9;H0YCG2	6;6;5;5;4;3	6;6;5;5;4;3	6;6;5;5;4;3	367650000	461170000	372410000	Lysosome-associated membrane glycoprotein 2	LAMP2	;;;;;	6	6	6	6	6	6	6	6	6	6	6	6	6	14.6	14.6	14.6	39.811	363	363;410;410;411;300;258	1	95	0	38.212	14.6	14.6	14.6	5227800000	436680000	408800000	415220000	5	5	5	57
B4E2V5;P27105;P27105-2	B4E2V5;P27105	10;10;3	10;10;3	10;10;3	1150800000	1124900000	1150800000	Erythrocyte band 7 integral membrane protein	STOM	;	3	10	10	10	10	10	10	10	10	10	10	10	10	60.3	60.3	60.3	25.964	237	237;288;123	1	159	0	147.12	60.3	60.3	60.3	14013000000	1295900000	1075300000	1150800000	10	6	8	97
B4E2X3;Q8N6R0-3;Q8N6R0;Q8N6R0-4;Q8N6R0-1;Q8N6R0-2	B4E2X3;Q8N6R0-3;Q8N6R0;Q8N6R0-4;Q8N6R0-1;Q8N6R0-2	6;6;6;5;4;3	6;6;6;5;4;3	6;6;6;5;4;3	47196000	55385000	52529000	Methyltransferase-like protein 13	METTL13	;;;;;	6	6	6	6	2	5	4	2	5	4	2	5	4	11.7	11.7	11.7	78.687	698	698;613;699;642;543;396	1	49	0	20.43	3.6	9.9	8.6	643890000	19592000	68017000	48048000	0	0	1	9
B5MCF9;O00541-2;O00541;B3KXD6;H7C267	B5MCF9;O00541-2;O00541;B3KXD6	7;7;7;5;1	7;7;7;5;1	7;7;7;5;1	125510000	131380000	131050000	Pescadillo homolog	PES1	;;;	5	7	7	7	5	4	4	5	4	4	5	4	4	13.7	13.7	13.7	66.077	571	571;583;588;449;194	1	62	0	6.4954	9.6	8.2	8.2	1621800000	88400000	75383000	68688000	1	0	0	15
B5MCZ3;P05231;B5MC21;B5MC14;B4DNQ5;B4DNV3;C9J5B0	B5MCZ3;P05231;B5MC21;B5MC14;B4DNQ5;B4DNV3;C9J5B0	7;7;6;5;5;4;4	7;7;6;5;5;4;4	7;7;6;5;5;4;4	74657000	62774000	77372000	Interleukin-6	IL6	;;;;;;	7	7	7	7	4	4	5	4	4	5	4	4	5	42.9	42.9	42.9	21.494	189	189;212;136;198;252;122;152	1	55	0	15.28	20.6	20.6	29.1	904500000	71611000	46446000	72158000	1	0	0	16
B5MD17;J3KS05;P83916;K7ELA4;C9JWS9	B5MD17;J3KS05;P83916;K7ELA4;C9JWS9	4;4;4;3;2	3;3;3;2;2	3;3;3;2;2	0	44261000	32134000	Chromobox protein homolog 1	CBX1	;;;;	5	4	3	3	3	3	3	2	2	2	2	2	2	37.5	28	28	19.325	168	168;173;185;138;110	1	21	0	4.3543	33.3	20.2	20.2	380960000	4997800	38470000	30904000	1	2	0	12
B5MDU6;Q9H6V9;Q9H6V9-2;C9JHU6;B5MCU4;Q9H6V9-4;Q9H6V9-3;C9JUM0;B5MCE2;B4DRG3	B5MDU6;Q9H6V9;Q9H6V9-2;C9JHU6;B5MCU4;Q9H6V9-4;Q9H6V9-3;C9JUM0	4;4;4;3;3;3;3;2;1;1	4;4;4;3;3;3;3;2;1;1	4;4;4;3;3;3;3;2;1;1	223620000	257660000	364720000	UPF0554 protein C2orf43	LDAH;C2orf43	;;;;;;;	10	4	4	4	3	2	3	3	2	3	3	2	3	18.9	18.9	18.9	42.668	370	370;325;331;130;240;195;277;159;146;166	1	36	0	6.7168	16.8	14.1	16.8	3288100000	169530000	264640000	229590000	1	1	1	13
B7WPF4;Q9UPU5	B7WPF4;Q9UPU5	16;16	16;16	16;16	77713000	101200000	92479000	Ubiquitin carboxyl-terminal hydrolase 24	USP24	;	2	16	16	16	10	8	10	10	8	10	10	8	10	8	8	8	277.41	2460	2460;2620	1	108	0	21.834	5.2	4.1	4.8	1046500000	100020000	70951000	90406000	7	2	3	43
B7WPG3;D6W592;Q8WVV9-5;Q8WVV9-4;Q8WVV9;H7C464;C9IYN3;Q8WVV9-3;Q8WVV9-2;H7BXH8;C9JJZ7	B7WPG3;D6W592;Q8WVV9-5;Q8WVV9-4;Q8WVV9	9;9;9;9;9;3;3;3;3;2;1	9;9;9;9;9;3;3;3;3;2;1	9;9;9;9;9;3;3;3;3;2;1	141780000	119110000	113850000	Heterogeneous nuclear ribonucleoprotein L-like	HNRNPLL;HNRPLL	;;;;	11	9	9	9	4	5	7	4	5	7	4	5	7	23.4	23.4	23.4	56.45	508	508;542;508;537;542;133;282;275;282;217;149	1	77	0	22.346	9.8	11.6	18.7	1615000000	94990000	110550000	149930000	4	1	2	24
B7Z1C4;P40123;B7Z385;E9PDI2;B7Z214;F8WEW0;F8WDB9	B7Z1C4;P40123;B7Z385;E9PDI2	10;10;8;8;3;2;2	9;9;7;7;2;2;2	9;9;7;7;2;2;2	138850000	118840000	109780000	Adenylyl cyclase-associated protein 2;Adenylyl cyclase-associated protein	CAP2	;;;	7	10	9	9	7	8	7	6	7	6	6	7	6	34.9	32.9	32.9	45.245	413	413;477;365;451;217;104;194	1	80	0	21.159	24.9	28.6	22.8	1708300000	141120000	141860000	110760000	2	1	0	24
B7Z2S5;Q16881-4;Q16881-3;Q16881;B2R5P6;E2QRB9;E9PNQ6;E7ESI6;E7EW10;Q16881-5;Q16881-2;Q16881-6;E9PIR7;Q16881-7;E9PKD3;E9PIZ5;E9PLT3;E9PKI4;E9PQI3;E9PRI8;E9PJU2	B7Z2S5;Q16881-4;Q16881-3;Q16881;B2R5P6;E2QRB9;E9PNQ6;E7ESI6;E7EW10;Q16881-5;Q16881-2;Q16881-6;E9PIR7;Q16881-7	32;32;32;32;30;30;30;30;30;30;30;30;28;25;14;8;6;6;5;2;1	32;32;32;32;30;30;30;30;30;30;30;30;28;25;14;8;6;6;5;2;1	31;31;31;31;29;29;29;29;29;29;29;29;27;24;13;7;5;5;5;2;1	6610800000	7062600000	7022200000	Thioredoxin reductase 1, cytoplasmic	TXNRD1	;;;;;;;;;;;;;	21	32	32	31	29	31	28	29	31	28	28	30	27	67.8	67.8	65.1	60.021	547	547;551;598;649;497;541;568;581;612;499;543;614;482;461;175;139;70;72;53;44;96	1	590	0	323.31	66.5	66.5	60.3	82292000000	6539600000	7144500000	7307900000	41	43	39	494
B7Z2X9;P09104;F5H0C8;F5H1C3;U3KQP4	B7Z2X9;P09104;F5H0C8	9;9;6;2;1	5;5;3;1;1	5;5;3;1;1	407400000	379640000	337760000	Gamma-enolase;Enolase	ENO2	;;	5	9	5	5	6	5	8	3	2	4	3	2	4	33	16.9	16.9	42.707	391	391;434;315;103;73	1	38	0	17.002	19.7	17.1	30.4	4505000000	72058000	38923000	3941400000	1	1	3	16
B7Z358;Q8N5N7	B7Z358;Q8N5N7	4;4	4;4	4;4	61124000	67380000	58706000	39S ribosomal protein L50, mitochondrial	MRPL50	;	2	4	4	4	3	3	2	3	3	2	3	3	2	46.7	46.7	46.7	15.524	135	135;158	1	45	0	24.103	37	32.6	23	812660000	65491000	55948000	58578000	4	2	2	28
B7Z468;B7Z574;P20810-4;P20810-8;P20810;E9PCH5;P20810-2;E7ES10;E9PDE4;P20810-3;H0Y7F0;E7EQ12;E7EQA0;H0Y944;D6RBR1;D6RGF7;E7EN75;D6RAA8;D6RC54;E7EQK6	B7Z468;B7Z574;P20810-4;P20810-8;P20810;E9PCH5;P20810-2;E7ES10;E9PDE4;P20810-3;H0Y7F0;E7EQ12;E7EQA0	40;33;33;33;33;32;32;30;29;29;26;23;22;11;9;8;7;4;4;3	40;33;33;33;33;32;32;30;29;29;26;23;22;11;9;8;7;4;4;3	1;0;0;0;0;0;0;0;0;0;0;0;0;0;1;1;1;0;0;0	5323200000	5071600000	5314200000	Calpastatin	CAST	;;;;;;;;;;;;	20	40	40	1	37	33	37	37	33	37	1	1	1	61.8	61.8	1.1	80.998	754	754;694;667;686;708;673;695;642;636;590;436;423;431;288;150;149;156;78;91;156	1	716	0	323.31	56.4	57.4	60.1	65149000000	5723300000	4058400000	5120900000	40	35	38	455
B7Z4B8;Q9BUJ2-4;Q9BUJ2-2;Q9BUJ2;M0R3F1;Q9BUJ2-3;M0QYZ0;M0R0K8;M0R203;M0QZV6;M0QYI8;Q9BUJ2-5;M0QYM5	B7Z4B8;Q9BUJ2-4;Q9BUJ2-2;Q9BUJ2;M0R3F1;Q9BUJ2-3;M0QYZ0	27;27;27;27;23;23;16;5;4;4;4;4;1	27;27;27;27;23;23;16;5;4;4;4;4;1	27;27;27;27;23;23;16;5;4;4;4;4;1	1316600000	1291400000	1425500000	Heterogeneous nuclear ribonucleoprotein U-like protein 1	HNRNPUL1	;;;;;;	13	27	27	27	22	22	23	22	22	23	22	22	23	45.1	45.1	45.1	86.121	767	767;756;804;856;641;752;371;158;81;118;172;390;90	1	329	0	104.4	36.9	39.6	39	16089000000	1274300000	1214800000	1718900000	20	20	21	240
B7Z4K6;O00115;K7ENE5	B7Z4K6;O00115;K7ENE5	3;3;2	3;3;2	3;3;2	40428000	44576000	46930000	Deoxyribonuclease-2-alpha	DNASE2	;;	3	3	3	3	3	2	2	3	2	2	3	2	2	10.8	10.8	10.8	33.615	305	305;360;218	1	30	0	6.279	10.8	6.9	6.9	553170000	49944000	34847000	36414000	0	1	0	9
B7Z5N5;Q15796-2;Q15796;K7EJX0;K7ESI8;K7EL92;K7ERC7;H3BVD1;P84022-3;P84022-2;P84022;O15198-2;O15198;H0YMP2;H0YNV1;H0YL71;H0YKE2;H3BP09;H0YAK7;F5GWU7;P84022-4;Q99717;Q15797	B7Z5N5;Q15796-2;Q15796;K7EJX0	5;5;5;4;2;2;2;2;2;2;2;2;2;1;1;1;1;1;1;1;1;1;1	5;5;5;4;2;2;2;2;2;2;2;2;2;1;1;1;1;1;1;1;1;1;1	5;5;5;4;2;2;2;2;2;2;2;2;2;1;1;1;1;1;1;1;1;1;1	112300000	113690000	130480000	Mothers against decapentaplegic homolog;Mothers against decapentaplegic homolog 2	SMAD2	;;;	23	5	5	5	5	4	5	5	4	5	5	4	5	13.5	13.5	13.5	48.669	431	431;437;467;217;108;109;137;213;320;381;425;430;467;63;84;92;112;114;174;464;230;465;465	1	60	0	10.457	13.5	10.7	13.5	1464100000	116410000	105780000	145430000	3	2	2	20
B7Z6B8;Q16698;E5RFV2;E5RJG7;E5RJD2;E5RID6;H0YAW3	B7Z6B8;Q16698;E5RFV2	12;12;6;5;3;2;1	12;12;6;5;3;2;1	12;12;6;5;3;2;1	574630000	590000000	486470000	2,4-dienoyl-CoA reductase, mitochondrial	DECR1	;;	7	12	12	12	8	10	9	8	10	9	8	10	9	44.2	44.2	44.2	34.994	326	326;335;205;181;151;95;43	1	132	0	80.485	32.8	32.8	30.4	6659500000	555920000	617960000	489990000	11	9	6	93
B7Z6Q6;Q99661;Q5JR91;B7Z7M6;Q99661-2;Q5JR89	B7Z6Q6;Q99661;Q5JR91;B7Z7M6;Q99661-2	4;4;3;3;3;1	4;4;3;3;3;1	4;4;3;3;3;1	39964000	42847000	0	Kinesin-like protein;Kinesin-like protein KIF2C	KIF2C	;;;;	6	4	4	4	3	3	2	3	3	2	3	3	2	5.7	5.7	5.7	76.982	684	684;725;336;612;671;287	1	32	0	5.1382	4.5	4.5	2.6	470110000	40351000	41312000	23104000	0	0	0	5
B7Z7A3;Q9BZE4;B4DY13;Q5T3R7	B7Z7A3;Q9BZE4;B4DY13;Q5T3R7	8;8;5;4	8;8;5;4	8;8;5;4	66810000	61591000	68210000	Nucleolar GTP-binding protein 1	GTPBP4	;;;	4	8	8	8	7	5	5	7	5	5	7	5	5	15	15	15	68.272	587	587;634;518;140	1	68	0	11.531	13.6	9.9	10.1	810470000	99214000	38429000	52029000	3	1	3	21
B7Z7F3;Q9H6Z4-3;Q9H6Z4-2;Q9H6Z4;F5H4C2;K7EIJ4;K7EJV3;K7ENJ2;K7EID7;K7ENB9;K7EPW1;K7ESQ0;K7EN31	B7Z7F3;Q9H6Z4-3;Q9H6Z4-2;Q9H6Z4;F5H4C2;K7EIJ4	9;9;9;9;8;5;2;1;1;1;1;1;1	9;9;9;9;8;5;2;1;1;1;1;1;1	9;9;9;9;8;5;2;1;1;1;1;1;1	123930000	131390000	133350000	Ran-binding protein 3	RANBP3	;;;;;	13	9	9	9	6	6	6	6	6	6	6	6	6	23.9	23.9	23.9	52.894	494	494;499;562;567;439;155;174;62;73;74;108;122;171	1	79	0	20.661	14.2	16.2	16	1537500000	114570000	121910000	124150000	3	4	3	43
B7Z817;Q15392;F5H0H1;H7C4B7	B7Z817;Q15392;F5H0H1	16;16;10;7	16;16;10;7	16;16;10;7	748840000	634400000	751620000	Delta(24)-sterol reductase	DHCR24	;;	4	16	16	16	13	10	12	13	10	12	13	10	12	35.4	35.4	35.4	54.75	475	475;516;300;154	1	173	0	48.278	28.2	24	25.9	9005700000	908610000	437170000	644660000	6	4	4	80
B7Z9I3;O75787;H0Y750;B7Z1I9;B7Z413;H7C3E1;H7C240	B7Z9I3;O75787;H0Y750;B7Z1I9;B7Z413;H7C3E1	6;6;5;5;5;4;2	6;6;5;5;5;4;2	6;6;5;5;5;4;2	94518000	90128000	91290000	Renin receptor	ATP6AP2	;;;;;	7	6	6	6	4	5	3	4	5	3	4	5	3	27.4	27.4	27.4	35.612	318	318;350;243;272;274;259;203	1	56	0	30.1	18.6	23.9	14.8	1113400000	88229000	73210000	53015000	2	2	3	35
B7Z9S8;A6NGH2;P05026-2;P05026;V9GYR2	B7Z9S8;A6NGH2;P05026-2;P05026;V9GYR2	8;8;8;8;5	8;8;8;8;5	8;8;8;8;5	339740000	370050000	386370000	Sodium/potassium-transporting ATPase subunit beta-1	ATP1B1	;;;;	5	8	8	8	8	6	7	8	6	7	8	6	7	39.3	39.3	39.3	28.627	247	247;295;301;303;130	1	109	0	32.56	39.3	28.3	34.8	4526400000	380040000	322630000	408920000	9	6	7	79
B7ZC38;Q9NR46;Q9NR46-2;B7ZC39;F8WFB9;G5E9J1;H7C1Z6	B7ZC38;Q9NR46;Q9NR46-2;B7ZC39	14;14;14;13;5;1;1	14;14;14;13;5;1;1	13;13;13;12;4;1;1	533050000	420950000	417820000	Endophilin-B2	SH3GLB2	;;;	7	14	14	13	11	11	12	11	11	12	10	10	11	44.2	44.2	42.2	44.361	400	400;395;404;374;127;24;59	1	171	0	84.065	31.8	33	31.8	5392600000	500070000	437490000	435050000	5	6	6	70
B7ZKQ9;Q8WTV0-4;Q8WTV0-2;Q8WTV0-3;F5H4X0;B3KW46;B4DZ71;Q8WTV0-5;Q8WTV0;F5H5E8	B7ZKQ9;Q8WTV0-4;Q8WTV0-2;Q8WTV0-3;F5H4X0;B3KW46;B4DZ71;Q8WTV0-5;Q8WTV0	10;10;10;9;8;8;8;8;8;1	10;10;10;9;8;8;8;8;8;1	10;10;10;9;8;8;8;8;8;1	212080000	228160000	235390000	Scavenger receptor class B member 1	SCARB1	;;;;;;;;	10	10	10	10	6	5	9	6	5	9	6	5	9	21.8	21.8	21.8	53.847	481	481;474;509;409;499;512;516;506;552;146	1	100	0	23.679	13.9	10.8	20.2	2686600000	172170000	165980000	310860000	2	2	3	35
B7ZLW7;Q99707;B1ANE3	B7ZLW7;Q99707	3;3;1	3;3;1	3;3;1	0	0	20085000	Methionine synthase	MTR	;	3	3	3	3	0	0	1	0	0	1	0	0	1	4.1	4.1	4.1	134.79	1214	1214;1265;819	1	7	0	5.7803	0	0	1.1	87264000	0	0	19630000	0	0	1	4
B8ZZD4;Q86VP1-3;Q86VP1-4;Q86VP1-2;Q86VP1;H7C3L5	B8ZZD4;Q86VP1-3;Q86VP1-4;Q86VP1-2;Q86VP1	5;5;5;5;5;1	5;5;5;5;5;1	5;5;5;5;5;1	43377000	0	0	Tax1-binding protein 1	TAX1BP1	;;;;	6	5	5	5	3	3	3	3	3	3	3	3	3	6.4	6.4	6.4	93.609	813	813;563;590;747;789;326	1	34	0	4.3669	4.3	3.7	3.7	470520000	41781000	32751000	34033000	1	1	0	9
B8ZZN6;P63165;B8ZZ67;P63165-2;B8ZZJ0;B9A032	B8ZZN6;P63165;B8ZZ67;P63165-2	5;5;3;3;2;2	5;5;3;3;2;2	5;5;3;3;2;2	293880000	269200000	310790000	Small ubiquitin-related modifier 1	SUMO1	;;;	6	5	5	5	5	4	4	5	4	4	5	4	4	35.6	35.6	35.6	16.645	146	146;101;62;76;58;77	1	57	0	12.901	35.6	30.8	30.8	3484800000	320070000	259010000	321910000	1	2	1	22
B8ZZQ6;P06454-2;P06454;B8ZZA1;B8ZZW7;H7C2N1	B8ZZQ6;P06454-2;P06454;B8ZZA1;B8ZZW7;H7C2N1	7;7;7;6;6;6	7;7;7;6;6;6	7;7;7;6;6;6	2616100000	2891200000	2701300000	Prothymosin alpha;Prothymosin alpha, N-terminally processed;Thymosin alpha-1	PTMA	;;;;;	6	7	7	7	7	7	7	7	7	7	7	7	7	37.4	37.4	37.4	11.758	107	107;110;111;131;136;148	1	155	0	133.89	37.4	37.4	37.4	30189000000	2415200000	3035200000	2270600000	13	13	12	157
B8ZZS4;Q9H8Y5	B8ZZS4;Q9H8Y5	5;5	5;5	5;5	46685000	36337000	0	Ankyrin repeat and zinc finger domain-containing protein 1	ANKZF1	;	2	5	5	5	4	2	2	4	2	2	4	2	2	15.9	15.9	15.9	57.572	516	516;726	1	29	0	19.577	14	5	7.8	381110000	38158000	24848000	28343000	3	0	0	13
B9ZVX0;E9PHQ0;E7ET75;E9PEZ3;H9KV28;O60610-2;O60610-3;O60610;E7ERW8;E7EMV0;B4E2I7;E5RJ79	B9ZVX0;E9PHQ0;E7ET75;E9PEZ3;H9KV28;O60610-2;O60610-3;O60610;E7ERW8;E7EMV0	40;40;40;40;40;40;40;40;39;22;4;1	40;40;40;40;40;40;40;40;39;22;4;1	40;40;40;40;40;40;40;40;39;22;4;1	1188900000	1192900000	1224400000	Protein diaphanous homolog 1	DIAPH1	;;;;;;;;;	12	40	40	40	30	29	30	30	29	30	30	29	30	39.7	39.7	39.7	138.93	1248	1248;1260;1264;1269;1273;1248;1263;1272;1215;863;201;112	1	475	0	230.67	28	28.9	28.6	14403000000	1125200000	1003600000	1197100000	15	16	24	232
C9J0I9;Q86WB0-3;Q86WB0-2;Q86WB0	C9J0I9;Q86WB0-3;Q86WB0-2;Q86WB0	5;5;5;5	5;5;5;5	5;5;5;5	36791000	51141000	46181000	Nuclear-interacting partner of ALK	ZC3HC1	;;;	4	5	5	5	3	3	4	3	3	4	3	3	4	13.7	13.7	13.7	50.562	459	459;431;481;502	1	46	0	6.791	7	7.8	10.5	538560000	38821000	52277000	55036000	3	1	2	18
C9J0K6;P30626-3;P30626-2;P30626;B4DHQ6	C9J0K6;P30626-3;P30626-2;P30626;B4DHQ6	8;8;8;8;4	8;8;8;8;4	8;8;8;8;4	356570000	247940000	401650000	Sorcin	SRI	;;;;	5	8	8	8	6	7	6	6	7	6	6	7	6	51	51	51	17.605	155	155;180;183;198;158	1	90	0	22.899	38.7	43.9	36.8	4870800000	472980000	274580000	402910000	4	4	3	44
C9J173;B8ZZF6;E7ET59;E7EUX4;E7ENF2;P49441;C9J128;C9J2Z6	C9J173;B8ZZF6;E7ET59;E7EUX4;E7ENF2;P49441;C9J128;C9J2Z6	2;2;2;2;2;2;1;1	2;2;2;2;2;2;1;1	2;2;2;2;2;2;1;1	34648000	0	0	Inositol polyphosphate 1-phosphatase	INPP1	;;;;;;;	8	2	2	2	2	1	1	2	1	1	2	1	1	20.3	20.3	20.3	16.132	143	143;155;190;212;213;399;68;88	1	16	0	8.073	20.3	8.4	8.4	393180000	34611000	27500000	30401000	0	1	0	8
C9J2G3;C9JQQ2;Q9NWU1-2;Q9NWU1;F8VNS3	C9J2G3;C9JQQ2;Q9NWU1-2;Q9NWU1;F8VNS3	2;2;2;2;1	2;2;2;2;1	2;2;2;2;1	24668000	0	0	3-oxoacyl-[acyl-carrier-protein] synthase, mitochondrial	OXSM	;;;;	5	2	2	2	2	1	1	2	1	1	2	1	1	16.8	16.8	16.8	23.632	220	220;231;376;459;102	1	21	0	6.2101	16.8	6.8	6.8	293300000	24492000	14365000	13213000	2	1	1	14
C9J2U4;Q96BW9-2;Q96BW9;B4E101;H7C1A2;G3V0F3	C9J2U4;Q96BW9-2;Q96BW9;B4E101	4;3;3;2;1;1	4;3;3;2;1;1	4;3;3;2;1;1	18080000	0	0	Phosphatidate cytidylyltransferase, mitochondrial	TAMM41	;;;	6	4	4	4	3	0	1	3	0	1	3	0	1	19	19	19	38.078	337	337;316;452;151;55;107	1	15	0	13.128	16.6	0	4.7	144080000	19491000	0	13477000	1	0	0	5
C9J4M6;C9J2Y9;P30876	C9J4M6;C9J2Y9;P30876	8;8;8	8;8;8	8;8;8	69502000	62766000	70689000	DNA-directed RNA polymerase;DNA-directed RNA polymerase II subunit RPB2	POLR2B	;;	3	8	8	8	6	4	5	6	4	5	6	4	5	8.7	8.7	8.7	125.19	1099	1099;1167;1174	1	61	0	13.996	6.9	4.7	5.6	804270000	82401000	47956000	68858000	2	1	3	17
C9J4Z3;P61513;M0R0A1;Q6P4E4;E9PEL3;M0R2L6;G5E9R3;A6NKH3	C9J4Z3;P61513;M0R0A1;Q6P4E4;E9PEL3;M0R2L6;G5E9R3	5;5;4;4;4;4;3;1	5;5;4;4;4;4;3;1	5;5;4;4;4;4;3;1	1269800000	933810000	881600000	60S ribosomal protein L37a	RPL37A	;;;;;;	8	5	5	5	5	5	5	5	5	5	5	5	5	69.1	69.1	69.1	7.624	68	68;92;60;72;75;88;58;93	1	102	0	96.421	69.1	69.1	69.1	11698000000	1338700000	936460000	957020000	7	5	6	71
C9J5N1;Q9BTE6;Q9BTE6-2;Q9BTE6-3;K7EQ85;L7N2F4	C9J5N1;Q9BTE6;Q9BTE6-2;Q9BTE6-3;K7EQ85	4;4;4;4;3;1	4;4;4;4;3;1	4;4;4;4;3;1	20518000	23195000	28422000	Alanyl-tRNA editing protein Aarsd1	PTGES3L-AARSD1;AARSD1	;;;;	6	4	4	4	3	3	3	3	3	3	3	3	3	10.1	10.1	10.1	55.065	495	495;412;525;586;94;140	1	32	0	5.2951	7.5	7.5	7.5	290460000	24442000	25015000	31576000	0	0	2	18
C9J6N5;C9JQ40;C9JW51;Q9H098;C9J3Q3;Q9H098-2;X6RET8;C9JP05;C9JYP1;C9J6Y8;F8WCJ2	C9J6N5;C9JQ40;C9JW51;Q9H098;C9J3Q3;Q9H098-2;X6RET8;C9JP05	5;5;5;5;4;4;3;3;2;2;1	5;5;5;5;4;4;3;3;2;2;1	5;5;5;5;4;4;3;3;2;2;1	92715000	90975000	86075000	Protein FAM107B	FAM107B	;;;;;;;	11	5	5	5	4	2	3	4	2	3	4	2	3	49.2	49.2	49.2	14.844	124	124;126;128;131;101;306;90;93;67;84;51	1	45	0	8.8687	42.7	24.2	30.6	1023700000	118440000	67511000	65252000	2	1	2	15
C9J712;P35080;C9JQ45;C9J2N0	C9J712;P35080;C9JQ45;C9J2N0	5;5;3;3	5;5;3;3	2;2;0;1	231760000	248410000	250580000	Profilin-2;Profilin	PFN2	;;;	4	5	5	2	4	5	5	4	5	5	2	2	2	64.8	64.8	19.8	9.7982	91	91;140;110;125	1	70	0	30.629	49.5	64.8	64.8	2915800000	275380000	173640000	331860000	4	6	3	42
C9J7K9;O15162-2;O15162;H7C5I5;C9J9P4;C9J0H3;C9JE06	C9J7K9;O15162-2;O15162;H7C5I5;C9J9P4	5;5;5;4;3;2;2	5;5;5;4;3;2;2	5;5;5;4;3;2;2	350540000	371400000	385690000	Phospholipid scramblase 1	PLSCR1	;;;;	7	5	5	5	5	5	5	5	5	5	5	5	5	18.3	18.3	18.3	34.217	311	311;237;318;171;248;171;249	1	65	0	24.66	18.3	18.3	18.3	4265800000	415240000	386330000	429710000	3	2	1	22
C9J8Q1;F8W9P7;H7C537;Q9UMS0-2;Q9UMS0-3;Q9UMS0	C9J8Q1;F8W9P7;H7C537;Q9UMS0-2;Q9UMS0-3;Q9UMS0	1;1;1;1;1;1	1;1;1;1;1;1	1;1;1;1;1;1	38915000	46157000	37460000	NFU1 iron-sulfur cluster scaffold homolog, mitochondrial	NFU1	;;;;;	6	1	1	1	1	1	1	1	1	1	1	1	1	15.6	15.6	15.6	10.443	96	96;99;126;113;230;254	1	24	0.00050826	2.8694	15.6	15.6	15.6	528580000	41026000	42934000	35390000	1	2	1	20
C9J8T0;P57772	C9J8T0;P57772	4;4	4;4	4;4	51986000	45647000	56442000	Selenocysteine-specific elongation factor	EEFSEC	;	2	4	4	4	2	4	3	2	4	3	2	4	3	11	11	11	47.876	436	436;596	1	42	0	5.7994	5.5	11	7.8	539150000	34342000	47683000	36777000	2	1	2	14
C9J8T6;Q14061;H7C4E5	C9J8T6;Q14061;H7C4E5	2;2;1	2;2;1	2;2;1	46041000	45047000	46462000	Cytochrome c oxidase copper chaperone	COX17	;;	3	2	2	2	2	2	2	2	2	2	2	2	2	29.6	29.6	29.6	10.853	98	98;63;58	1	22	0	10.935	29.6	29.6	29.6	486230000	46409000	39957000	47136000	1	1	1	9
C9J9K3;P08865;A6NE09;C9JQR9	C9J9K3;P08865;A6NE09	15;15;13;4	15;15;13;4	15;15;13;4	7674800000	8594400000	7771100000	40S ribosomal protein SA	RPSA;RPSAP58	;;	4	15	15	15	14	15	15	14	15	15	14	15	15	70	70	70	29.404	263	263;295;295;73	1	366	0	323.31	67.7	70	70	101650000000	6945700000	8190200000	8310900000	25	22	16	278
C9JA08;Q96D46;C9J0B9;C9IZW9;C9K0C2;C9IY70	C9JA08;Q96D46	10;10;3;2;2;1	10;10;3;2;2;1	10;10;3;2;2;1	144980000	172450000	154630000	60S ribosomal export protein NMD3	NMD3	;	6	10	10	10	6	5	5	6	5	5	6	5	5	31.4	31.4	31.4	60.125	529	529;503;218;155;162;98	1	89	0	23.179	21.7	16.1	12.7	1944300000	142150000	119610000	116120000	6	3	1	46
C9JA28;Q9UNL2;B4E2P2;C9J365	C9JA28;Q9UNL2;B4E2P2;C9J365	2;2;2;1	2;2;2;1	2;2;2;1	454010000	510640000	436120000	Translocon-associated protein subunit gamma	SSR3	;;;	4	2	2	2	1	2	2	1	2	2	1	2	2	12.6	12.6	12.6	20.161	174	174;185;198;133	1	35	0	22.868	8	12.6	12.6	5797700000	207830000	430270000	481720000	2	2	3	25
C9JAB2;Q16629-3;Q16629-2;Q16629-4;Q16629;F8WEA1	C9JAB2;Q16629-3;Q16629-2;Q16629-4;Q16629	8;8;8;8;8;3	8;8;8;8;8;3	7;7;7;7;7;3	1153700000	1184700000	1207900000	Serine/arginine-rich splicing factor 7	SRSF7	;;;;	6	8	8	7	7	8	7	7	8	7	6	7	6	31.9	31.9	31.9	26.928	235	235;132;135;226;238;51	1	136	0	33.443	28.1	31.9	28.1	14011000000	1036800000	1104000000	1169300000	8	8	7	91
C9JAG1;Q9C0D9	C9JAG1;Q9C0D9	2;2	2;2	2;2	38822000	0	0	Ethanolaminephosphotransferase 1	EPT1	;	2	2	2	2	2	1	1	2	1	1	2	1	1	21.7	21.7	21.7	20.557	180	180;397	1	15	0	14.786	21.7	8.9	8.9	385680000	54583000	23178000	27328000	2	0	0	9
C9JAW5;C9JNU6;Q9Y241;A8MV81;Q9Y241-2	C9JAW5;C9JNU6;Q9Y241;A8MV81;Q9Y241-2	2;2;2;1;1	2;2;2;1;1	2;2;2;1;1	41488000	36439000	46922000	HIG1 domain family member 1A, mitochondrial;HIG1 domain family member 1C	HIGD1A;HIGD1C	;;;;	5	2	2	2	2	2	2	2	2	2	2	2	2	32.5	32.5	32.5	8.8131	83	83;96;93;97;107	1	20	0	28.755	32.5	32.5	32.5	483390000	41544000	33624000	46073000	3	2	2	21
C9JC60;G5E977;Q6XQN6;Q6XQN6-2;C9J8U2;Q6XQN6-3;H0YF31;H0YDA6	C9JC60;G5E977;Q6XQN6;Q6XQN6-2;C9J8U2;Q6XQN6-3	12;12;12;12;10;10;3;1	12;12;12;12;10;10;3;1	12;12;12;12;10;10;3;1	238360000	219530000	135910000	Nicotinate phosphoribosyltransferase	NAPRT	;;;;;	8	12	12	12	9	10	8	9	10	8	9	10	8	36.6	36.6	36.6	60.234	566	566;584;538;567;490;525;163;128	1	114	0	51.968	27.6	28.8	24.7	2826300000	298800000	224920000	161350000	6	4	2	48
C9JCC6;Q14919;Q14919-2;E9PQX9;E9PNC7;E9PMW2	C9JCC6;Q14919;Q14919-2;E9PQX9	5;5;5;4;2;1	5;5;5;4;2;1	5;5;5;4;2;1	213700000	177490000	190380000	Dr1-associated corepressor	DRAP1	;;;	6	5	5	5	4	4	4	4	4	4	4	4	4	24.5	24.5	24.5	23.205	212	212;205;211;185;155;161	1	50	0	9.0943	24.1	24.1	24.1	2506200000	216050000	165970000	217460000	3	3	3	36
C9JCN8;P15408-3;P15408;P15408-2	C9JCN8;P15408-3;P15408;P15408-2	3;3;3;2	3;3;3;2	3;3;3;2	43587000	0	41772000	Fos-related antigen 2	FOSL2	;;;	4	3	3	3	2	1	2	2	1	2	2	1	2	25.2	25.2	25.2	22.254	202	202;287;326;318	1	21	0	7.4606	19.3	8.9	19.3	402610000	35057000	14436000	32368000	1	0	1	8
C9JDG0;Q9NSV4-7;Q9NSV4-6;Q9NSV4-5;Q9NSV4-4;Q9NSV4;Q9NSV4-2;Q9NSV4-1	C9JDG0;Q9NSV4-7;Q9NSV4-6;Q9NSV4-5;Q9NSV4-4;Q9NSV4;Q9NSV4-2;Q9NSV4-1	7;7;7;7;7;7;4;4	7;7;7;7;7;7;4;4	7;7;7;7;7;7;4;4	67894000	65479000	73954000	Protein diaphanous homolog 3	DIAPH3	;;;;;;;	8	7	7	7	6	7	7	6	7	7	6	7	7	7.2	7.2	7.2	136.88	1193	1193;1112;1123;1147;1182;1193;691;849	1	64	0	13.256	6.1	7.2	7.2	877120000	96058000	85203000	92463000	1	3	4	22
C9JFE4;Q13098-5;Q13098;Q13098-7;Q13098-6;J3KSA5;J3QLT0;J3KRJ4;J3QS88;J3KTB0;J3QQX0;J3QS84;J3QLE8;J3QL53;J3KRE8	C9JFE4;Q13098-5;Q13098;Q13098-7;Q13098-6	16;16;16;16;11;7;5;5;4;4;3;3;3;3;3	16;16;16;16;11;7;5;5;4;4;3;3;3;3;3	16;16;16;16;11;7;5;5;4;4;3;3;3;3;3	528730000	514560000	487620000	COP9 signalosome complex subunit 1	GPS1	;;;;	15	16	16	16	12	11	13	12	11	13	12	11	13	48.2	48.2	48.2	53.371	471	471;487;491;527;549;210;168;253;134;139;79;101;166;168;186	1	190	0	88.385	31.8	33.1	39.9	6320000000	518910000	381680000	514470000	4	4	6	80
C9JFV4;Q8IZL8;I3L3A8;F8WDZ1;I3L4M7;I3L445;E7EV54;I3L1P4	C9JFV4;Q8IZL8;I3L3A8;F8WDZ1	10;10;9;8;4;4;4;3	10;10;9;8;4;4;4;3	10;10;9;8;4;4;4;3	93603000	93773000	54116000	Proline-, glutamic acid- and leucine-rich protein 1	PELP1	;;;	8	10	10	10	9	7	5	9	7	5	9	7	5	14.8	14.8	14.8	135.51	1274	1274;1130;1180;1040;151;301;906;148	1	89	0	29.432	13.8	9.9	6.4	983720000	113650000	108600000	44177000	4	5	3	37
C9JG87;Q9NYK5;Q9NYK5-2	C9JG87;Q9NYK5;Q9NYK5-2	5;5;5	5;5;5	5;5;5	64925000	77011000	76270000	39S ribosomal protein L39, mitochondrial	MRPL39	;;	3	5	5	5	3	3	4	3	3	4	3	3	4	20.5	20.5	20.5	34.032	297	297;338;353	1	45	0	12.329	13.8	13.8	16.5	954890000	58721000	64120000	73040000	2	2	0	19
C9JG97;C9JEH3;Q13685;C9JTS3;H7C0R2	C9JG97;C9JEH3;Q13685;C9JTS3	6;6;6;4;2	6;6;6;4;2	6;6;6;4;2	81999000	74289000	81199000	Angio-associated migratory cell protein	AAMP	;;;	5	6	6	6	5	4	5	5	4	5	5	4	5	21.2	21.2	21.2	44.693	415	415;435;434;200;189	1	59	0	10.957	15.2	12	18.1	1031600000	84540000	59584000	85974000	2	1	1	18
C9JIF9;P13798;H7C393;H7C1U0;C9JLK2;F8WEH5	C9JIF9;P13798	18;18;8;7;4;2	18;18;8;7;4;2	18;18;8;7;4;2	540880000	498470000	505880000	Acylamino-acid-releasing enzyme	APEH	;	6	18	18	18	15	13	14	15	13	14	15	13	14	37.2	37.2	37.2	81.673	737	737;732;284;308;232;50	1	195	0	78.863	31.9	25.8	28.2	6488400000	614100000	501070000	579080000	13	12	8	108
C9JIK8;Q9Y4P1-6;Q9Y4P1;Q9Y4P1-2;F2Z2K8;C9J3C0;H7C2A6;C9JQ72;F8WD71;F5H7P2;Q9Y4P1-3;Q9Y4P1-4	C9JIK8;Q9Y4P1-6;Q9Y4P1;Q9Y4P1-2;F2Z2K8;C9J3C0;H7C2A6;C9JQ72;F8WD71;F5H7P2;Q9Y4P1-3;Q9Y4P1-4	2;2;2;2;1;1;1;1;1;1;1;1	2;2;2;2;1;1;1;1;1;1;1;1	2;2;2;2;1;1;1;1;1;1;1;1	0	23955000	0	Cysteine protease ATG4B	ATG4B	;;;;;;;;;;;	12	2	2	2	1	2	1	1	2	1	1	2	1	13.2	13.2	13.2	24.833	219	219;380;393;468;88;147;193;266;319;379;280;331	1	9	0	5.357	5.5	13.2	7.8	93479000	14149000	21974000	12731000	1	1	1	5
C9JIZ6;B1AVU8;P07602;P07602-2;P07602-3	C9JIZ6;B1AVU8;P07602;P07602-2;P07602-3	17;17;17;17;17	17;17;17;17;17	17;17;17;17;17	1318800000	1230500000	1220900000	Prosaposin;Saposin-A;Saposin-B-Val;Saposin-B;Saposin-C;Saposin-D	PSAP	;;;;	5	17	17	17	13	11	13	13	11	13	13	11	13	33.3	33.3	33.3	58.353	526	526;559;524;526;527	1	191	0	26.242	24.1	23	22.4	14775000000	1222400000	1107100000	1258100000	8	10	8	91
C9JJ19;P82930	C9JJ19;P82930	9;9	9;9	9;9	66535000	131690000	138180000	28S ribosomal protein S34, mitochondrial	MRPS34	;	2	9	9	9	6	7	6	6	7	6	6	7	6	48.9	48.9	48.9	26.332	225	225;218	1	70	0	9.338	33.3	38.2	31.6	1560500000	91761000	116550000	141250000	1	3	3	37
C9JLU1;P52434;P52434-3;P52434-4;P52434-2;P52434-5	C9JLU1;P52434;P52434-3;P52434-4;P52434-2	4;4;3;3;2;1	4;4;3;3;2;1	4;4;3;3;2;1	81768000	76171000	85349000	DNA-directed RNA polymerases I, II, and III subunit RPABC3	POLR2H	;;;;	6	4	4	4	2	3	2	2	3	2	2	3	2	35.1	35.1	35.1	16.925	148	148;150;114;175;122;86	1	31	0	7.6133	19.6	27	19.6	986600000	72558000	61952000	74404000	1	2	2	16
C9JME2;Q9Y4F1;Q9Y4F1-2;M0QYB0;H0Y783;M0QXT1;M0R262;Q9Y4F1-3	C9JME2;Q9Y4F1;Q9Y4F1-2	8;8;8;3;2;2;1;1	8;8;8;3;2;2;1;1	8;8;8;3;2;2;1;1	42290000	37346000	37220000	FERM, RhoGEF and pleckstrin domain-containing protein 1	FARP1	;;	8	8	8	8	4	3	6	4	3	6	4	3	6	10.9	10.9	10.9	122.09	1076	1076;1045;1076;203;215;248;171;129	1	45	0	9.9514	5.2	4.4	7.9	490040000	34332000	29700000	59294000	1	1	3	13
C9JNA8;Q92551-2;Q92551	C9JNA8;Q92551-2;Q92551	1;1;1	1;1;1	1;1;1	10228000	25040000	0	Inositol hexakisphosphate kinase 1	IP6K1	;;	3	1	1	1	1	1	1	1	1	1	1	1	1	4.4	4.4	4.4	31.293	274	274;276;441	1	10	0.0099525	1.6383	4.4	4.4	4.4	65863000	11588000	21473000	3349700	0	2	0	2
C9JNK6;O75431-2;O75431;C9JAZ1	C9JNK6;O75431-2;O75431;C9JAZ1	3;3;3;2	3;3;3;2	3;3;3;2	81191000	100870000	118180000	Metaxin-2	MTX2	;;;	4	3	3	3	2	3	3	2	3	3	2	3	3	21.7	21.7	21.7	23.643	207	207;253;263;229	1	51	0	16.05	16.9	21.7	21.7	1244500000	67722000	121330000	137870000	4	3	2	35
C9JNW5;P83731;C9JXB8	C9JNW5;P83731;C9JXB8	10;10;9	10;10;9	10;10;9	2562300000	2419600000	2285200000	60S ribosomal protein L24	RPL24	;;	3	10	10	10	9	8	7	9	8	7	9	8	7	52.7	52.7	52.7	17.542	150	150;157;121	1	170	0	31.782	48	41.3	41.3	30981000000	2758400000	2486000000	2395400000	10	7	6	87
C9JP00;Q9NR56;Q9NR56-3;Q9NR56-4;Q9NR56-7;Q9NR56-6;Q9NR56-2;Q9NR56-5;H7C4T5;O95205;Q86VM6;Q5VZF2-3;Q5VZF2-2;Q5VZF2;C9JCX1;B4E3F7;H7C4Y1	C9JP00;Q9NR56;Q9NR56-3;Q9NR56-4;Q9NR56-7;Q9NR56-6;Q9NR56-2;Q9NR56-5;H7C4T5;O95205;Q86VM6;Q5VZF2-3;Q5VZF2-2;Q5VZF2	6;6;5;5;5;5;5;5;4;3;3;3;3;3;2;2;2	6;6;5;5;5;5;5;5;4;3;3;3;3;3;2;2;2	6;6;5;5;5;5;5;5;4;3;3;3;3;3;2;2;2	156400000	151810000	177960000	Muscleblind-like protein 1;Muscleblind-like protein 2	MBNL1;MBLL;MBNL2	;;;;;;;;;;;;;	17	6	6	6	5	3	3	5	3	3	5	3	3	23.6	23.6	23.6	37.898	348	348;388;302;314;340;342;370;382;329;255;343;361;367;373;155;206;210	1	58	0	10.214	21.3	11.5	11.5	2017700000	155940000	115620000	160640000	2	2	1	23
C9JPG5;Q13275-2;Q13275	C9JPG5;Q13275-2;Q13275	2;2;2	2;2;2	2;2;2	0	10161000	0	Semaphorin-3F	SEMA3F	;;	3	2	2	2	1	1	1	1	1	1	1	1	1	3.4	3.4	3.4	77.312	686	686;754;785	1	12	0.0089409	1.7513	1.2	2.2	1.2	68890000	4758500	9320600	5250300	0	1	0	2
C9JQ41;H7C525;Q4VC31	C9JQ41;H7C525;Q4VC31	3;3;3	3;3;3	3;3;3	55060000	0	49063000	Coiled-coil domain-containing protein 58	CCDC58	;;	3	3	3	3	2	2	3	2	2	3	2	2	3	21.5	21.5	21.5	15.296	130	130;141;144	1	27	0.00027012	3.6801	13.1	14.6	21.5	545010000	39460000	36516000	58987000	2	1	0	11
C9JQV0;Q9BRJ6;H7C0T1;H7C2R9	C9JQV0;Q9BRJ6	3;3;1;1	3;3;1;1	3;3;1;1	88223000	105250000	107630000	Uncharacterized protein C7orf50	C7orf50	;	4	3	3	3	3	3	3	3	3	3	3	3	3	29.7	29.7	29.7	21.883	192	192;194;162;179	1	37	0	7.7894	29.7	29.7	29.7	1140200000	83182000	88759000	95942000	0	3	1	15
C9JRZ6;Q9NX63;F8WAR4;G3V1K1;F8WD73	C9JRZ6;Q9NX63;F8WAR4;G3V1K1	12;12;8;6;2	12;12;8;6;2	12;12;8;6;2	648240000	626860000	486260000	MICOS complex subunit MIC19	CHCHD3	;;;	5	12	12	12	10	11	11	10	11	11	10	11	11	51.3	51.3	51.3	26.694	232	232;227;241;138;63	1	133	0	46.904	41.4	47.4	47.4	7350900000	718240000	573840000	547520000	6	5	6	74
C9JS50;Q687X5;Q687X5-2	C9JS50;Q687X5;Q687X5-2	2;2;1	2;2;1	2;2;1	0	33743000	30075000	Metalloreductase STEAP4	STEAP4	;;	3	2	2	2	1	2	2	1	2	2	1	2	2	5.9	5.9	5.9	38.579	339	339;459;283	1	17	0.0029091	2.3283	2.9	5.9	5.9	316760000	31301000	34950000	26500000	1	0	0	5
C9JVN9;Q9H9P8-2;Q9H9P8	C9JVN9;Q9H9P8-2;Q9H9P8	3;3;3	3;3;3	3;3;3	0	0	26358000	L-2-hydroxyglutarate dehydrogenase, mitochondrial	L2HGDH	;;	3	3	3	3	3	3	3	3	3	3	3	3	3	8.6	8.6	8.6	48.475	441	441;441;463	1	36	0	5.5747	8.6	8.6	8.6	316010000	28521000	29522000	26830000	0	0	2	8
C9JZ85;A8MV29;E7EU78;C9J1R1;Q9Y6K9;Q9Y6K9-2;F8W9A9;C9JN51;Q9Y6K9-3;C9J2V2;C9JH59	C9JZ85;A8MV29;E7EU78;C9J1R1;Q9Y6K9;Q9Y6K9-2;F8W9A9;C9JN51	5;5;5;5;5;5;4;3;2;1;1	5;5;5;5;5;5;4;3;2;1;1	5;5;5;5;5;5;4;3;2;1;1	0	61438000	65200000	NF-kappa-B essential modulator	IKBKG	;;;;;;;	11	5	5	5	2	3	4	2	3	4	2	3	4	36.3	36.3	36.3	21.653	190	190;411;412;418;419;487;368;250;320;195;205	1	50	0	8.7466	11.6	21.1	29.5	698630000	28144000	38345000	69339000	0	0	1	12
C9JZR2;O60716-5;O60716-3;O60716-2;O60716;O60716-8;O60716-7;O60716-6;O60716-4;O60716-21;O60716-19;O60716-18;O60716-17;O60716-13;O60716-11;O60716-10;O60716-9;O60716-24;O60716-23;O60716-22;O60716-20;O60716-16;O60716-15;O60716-14;O60716-12;O60716-29;O60716-27;O60716-26;O60716-25;O60716-32;O60716-31;O60716-30;O60716-28;E9PRE2;H0YC95;E9PKY0;E9PKL1	C9JZR2;O60716-5;O60716-3;O60716-2;O60716;O60716-8;O60716-7;O60716-6;O60716-4;O60716-21;O60716-19;O60716-18;O60716-17;O60716-13;O60716-11;O60716-10;O60716-9;O60716-24;O60716-23;O60716-22;O60716-20;O60716-16;O60716-15;O60716-14;O60716-12;O60716-29;O60716-27;O60716-26;O60716-25;O60716-32;O60716-31;O60716-30;O60716-28	22;22;22;22;22;21;21;21;21;20;20;20;20;20;20;20;20;19;19;19;19;19;19;19;19;14;14;14;14;13;13;13;13;6;2;2;1	22;22;22;22;22;21;21;21;21;20;20;20;20;20;20;20;20;19;19;19;19;19;19;19;19;14;14;14;14;13;13;13;13;6;2;2;1	22;22;22;22;22;21;21;21;21;20;20;20;20;20;20;20;20;19;19;19;19;19;19;19;19;14;14;14;14;13;13;13;13;6;2;2;1	556870000	679270000	615780000	Catenin delta-1	CTNND1	;;;;;;;;;;;;;;;;;;;;;;;;;;;;;;;;	37	22	22	22	18	17	17	18	17	17	18	17	17	33	33	33	104.85	938	938;933;939;962;968;912;918;941;947;832;838;861;867;879;885;908;914;811;817;840;846;858;864;887;893;610;616;639;645;589;595;618;624;261;123;126;128	1	296	0	194.51	25.3	25.2	23.5	7776100000	629530000	511350000	555220000	15	13	12	156
C9JZY6;P62256;H7C4M9;C9JZG9;P62256-2;C9J8Q9	C9JZY6;P62256;H7C4M9;C9JZG9;P62256-2	5;5;4;4;4;2	5;5;4;4;4;2	5;5;4;4;4;2	338180000	294200000	336110000	Ubiquitin-conjugating enzyme E2 H	UBE2H	;;;;	6	5	5	5	4	4	5	4	4	5	4	4	5	46.3	46.3	46.3	13.818	123	123;183;62;103;152;149	1	66	0	91.05	39	39	46.3	4215500000	341680000	191380000	482710000	3	2	5	38
D3YTI9;A2AB90;O15533-2;O15533;O15533-3;O15533-4;C9JA35	D3YTI9;A2AB90;O15533-2;O15533;O15533-3;O15533-4	8;8;8;8;8;4;3	8;8;8;8;8;4;3	8;8;8;8;8;4;3	891500000	969810000	906630000	Tapasin	TAPBP	;;;;;	7	8	8	8	8	8	8	8	8	8	8	8	8	26.8	26.8	26.8	47.551	448	448;466;412;448;504;361;192	1	146	0	47.199	26.8	26.8	26.8	10772000000	976590000	958140000	747110000	10	9	7	107
D6R938;E9PBG7;E9PF82;Q13557-8;Q13557-12;Q13557-10;Q13557;Q13557-6;Q13557-11;Q13557-9;Q13557-5;Q13557-3;Q13557-4;H0Y9J2;H0Y9C2;H7BXS4;B7Z1Z6;Q9UQM7;Q9UQM7-2;E9PBE8;E7EQE4;D6RHX9;D6RFJ0;E7ERS6;E7ETC9;B4DVQ3;H7BZC6	D6R938;E9PBG7;E9PF82;Q13557-8;Q13557-12;Q13557-10;Q13557;Q13557-6;Q13557-11;Q13557-9;Q13557-5;Q13557-3;Q13557-4	14;14;14;14;14;14;14;14;14;13;13;13;13;6;6;4;3;3;3;2;2;1;1;1;1;1;1	14;14;14;14;14;14;14;14;14;13;13;13;13;6;6;4;3;3;3;2;2;1;1;1;1;1;1	10;10;10;10;10;10;10;10;10;9;9;9;9;6;4;0;0;0;0;0;0;0;0;0;0;0;0	322430000	315960000	344180000	Calcium/calmodulin-dependent protein kinase type II subunit delta	CAMK2D	;;;;;;;;;;;;	27	14	14	10	11	11	12	11	11	12	8	8	8	34.7	34.7	25.3	56.298	498	498;512;533;478;478;492;499;513;524;489;498;510;519;182;194;362;305;478;489;168;173;24;90;112;180;180;184	1	135	0	45.584	27.9	29.3	30.5	3814700000	376580000	279580000	391020000	5	3	5	50
D6R992;Q01201;D6RIV7	D6R992;Q01201	5;5;1	5;5;1	5;5;1	41935000	58580000	45333000	Transcription factor RelB	RELB	;	3	5	5	5	3	2	4	3	2	4	3	2	4	15.6	15.6	15.6	61.776	576	576;579;58	1	41	0	23.169	9	6.4	12	607360000	47133000	34210000	61771000	2	1	3	18
D6R9Z7;P15954	D6R9Z7;P15954	2;2	2;2	2;2	91691000	102290000	113620000	Cytochrome c oxidase subunit 7C, mitochondrial	COX7C	;	2	2	2	2	2	2	2	2	2	2	2	2	2	32.1	32.1	32.1	6.3824	56	56;63	1	34	0	5.0723	32.1	32.1	32.1	1268100000	77920000	102040000	113660000	1	1	3	12
D6RA70;Q9H6S0;D6RF50	D6RA70;Q9H6S0	6;6;1	6;6;1	6;6;1	27460000	0	0	Probable ATP-dependent RNA helicase YTHDC2	YTHDC2	;	3	6	6	6	3	2	2	3	2	2	3	2	2	11.5	11.5	11.5	82.988	739	739;1430;98	1	33	0	9.3091	6.9	2.8	2.8	302550000	29878000	9870600	19919000	0	0	1	12
D6RB81;Q9UHK6;Q9UHK6-5;V9GZ45;V9GYP4	D6RB81;Q9UHK6;Q9UHK6-5;V9GZ45;V9GYP4	3;3;3;2;2	3;3;3;2;2	3;3;3;2;2	31708000	0	0	Alpha-methylacyl-CoA racemase	AMACR	;;;;	5	3	3	3	3	1	1	3	1	1	3	1	1	10.6	10.6	10.6	40.674	367	367;382;394;260;288	1	30	0	8.8718	10.6	2.2	2.2	399250000	19343000	7453300	6772600	2	0	0	10
D6RB92;Q5JS54-3;Q5JS54;Q5JS54-2;D6REN3;E2QRC7;H7C465	D6RB92;Q5JS54-3;Q5JS54;Q5JS54-2;D6REN3;E2QRC7;H7C465	5;5;5;5;4;4;3	5;5;5;5;4;4;3	5;5;5;5;4;4;3	77110000	74392000	118410000	Proteasome assembly chaperone 4	PSMG4	;;;;;;	7	5	5	5	3	4	4	3	4	4	3	4	4	75.9	75.9	75.9	11.655	108	108;104;123;162;76;82;117	1	58	0	33.92	56.5	64.8	64.8	932570000	62919000	108060000	68900000	2	5	3	30
D6RBW1;P06730;P06730-3;P06730-2;H0Y8J7;D6RHE2;H0Y8X3;A6NMX2	D6RBW1;P06730;P06730-3;P06730-2;H0Y8J7	6;6;6;6;3;1;1;1	6;6;6;6;3;1;1;1	6;6;6;6;3;1;1;1	257410000	293320000	310400000	Eukaryotic translation initiation factor 4E	EIF4E	;;;;	8	6	6	6	5	6	6	5	6	6	5	6	6	23.7	23.7	23.7	28.512	245	245;217;237;248;155;90;171;242	1	74	0	32.29	20.4	23.7	23.7	3732700000	178660000	311770000	273100000	3	2	4	37
D6RCM8;O95379-3;O95379-2;O95379;O95379-4	D6RCM8;O95379-3;O95379-2;O95379;O95379-4	3;3;3;3;3	3;3;3;3;3	3;3;3;3;3	86018000	75489000	95284000	Tumor necrosis factor alpha-induced protein 8	TNFAIP8	;;;;	5	3	3	3	3	2	2	3	2	2	3	2	2	15.5	15.5	15.5	23.257	200	200;188;190;198;210	1	29	0	6.4277	15.5	8.5	8.5	1029700000	103110000	65716000	82179000	2	1	1	10
D6RDH4;Q9Y3D8-2;Q9Y3D8	D6RDH4;Q9Y3D8-2;Q9Y3D8	4;4;4	4;4;4	4;4;4	0	101520000	0	Adenylate kinase isoenzyme 6	TAF9;AK6	;;	3	4	4	4	2	4	4	2	4	4	2	4	4	30.5	30.5	30.5	16.919	141	141;169;172	1	45	0	7.5301	19.1	30.5	30.5	1048300000	60448000	97597000	94864000	1	1	0	7
D6REA1;Q9H173;D6RIU8;D6R940;D6RG16;D6RBP7;D6RAI3	D6REA1;Q9H173	6;6;2;1;1;1;1	6;6;2;1;1;1;1	6;6;2;1;1;1;1	87495000	67947000	97488000	Nucleotide exchange factor SIL1	SIL1	;	7	6	6	6	4	3	4	4	3	4	4	3	4	19.9	19.9	19.9	52.748	468	468;461;163;94;123;123;125	1	49	0	20.774	10.7	7.7	9.4	1056500000	82926000	50112000	91910000	2	0	1	17
D6REK3;Q6UX04-2;Q6UX04	D6REK3;Q6UX04-2;Q6UX04	2;2;2	2;2;2	2;2;2	21932000	0	0	Peptidyl-prolyl cis-trans isomerase CWC27 homolog	CWC27	;;	3	2	2	2	2	1	1	2	1	1	2	1	1	7.6	7.6	7.6	42.996	381	381;390;472	1	13	0.0017469	2.6323	7.6	2.9	2.9	208390000	22022000	17610000	20780000	2	1	1	10
D6REX3;O94979-6;O94979-3;O94979-10;O94979-4;O94979-9;O94979-2;O94979;O94979-8;D6RHZ5;H7BXG7;O94979-7;O94979-5;H0YAB3;H0Y8V7;H0Y9T9;H0Y9K1;H0Y8W8;D6RE64;D6RCQ9;H0YAF5;D6RBT0;D6RHE8;H0Y9V3	D6REX3;O94979-6;O94979-3;O94979-10;O94979-4;O94979-9;O94979-2;O94979;O94979-8;D6RHZ5;H7BXG7;O94979-7;O94979-5	34;33;33;33;33;33;33;33;33;27;25;25;20;16;10;8;8;6;4;4;4;2;2;2	34;33;33;33;33;33;33;33;33;27;25;25;20;16;10;8;8;6;4;4;4;2;2;2	34;33;33;33;33;33;33;33;33;27;25;25;20;16;10;8;8;6;4;4;4;2;2;2	1517100000	1442800000	1553200000	Protein transport protein Sec31A	SEC31A	;;;;;;;;;;;;	24	34	34	34	29	26	27	29	26	27	29	26	27	35.9	35.9	35.9	136.22	1251	1251;1067;1106;1166;1181;1200;1205;1220;1233;877;969;969;509;443;285;235;237;383;164;166;181;81;92;219	1	420	0	96.617	29.3	25.5	24.8	18603000000	1741200000	1370200000	1492100000	22	18	15	206
D6RGG3;Q99715;Q99715-4;Q99715-2;H0Y5N9;H0Y4P7;H0Y991	D6RGG3;Q99715;Q99715-4	38;38;37;14;6;5;4	38;38;37;14;6;5;4	38;38;37;14;6;5;4	509790000	514690000	558830000	Collagen alpha-1(XII) chain	COL12A1	;;	7	38	38	38	29	32	32	29	32	32	29	32	32	17.2	17.2	17.2	333.2	3062	3062;3063;2987;1899;756;638;207	1	373	0	93.23	13.2	13.8	14.4	6513500000	579580000	507680000	593990000	15	8	11	127
D6RGI3;D6RER5;Q9NVA2;Q9NVA2-2;D6RDU5;H0Y961;B1AMS2;F5H1J5;Q14141-2;Q14141-4;Q14141;D6RDP1;D6R9Y6;B4E049;H0Y9G8;Q14141-3	D6RGI3;D6RER5;Q9NVA2;Q9NVA2-2;D6RDU5	16;16;16;15;13;7;7;7;7;7;7;6;6;6;3;2	16;16;16;15;13;7;7;7;7;7;7;6;6;6;3;2	13;13;13;12;10;6;5;5;5;5;5;6;6;4;3;1	598510000	601090000	537240000	Septin-11	11\Sep	;;;;	16	16	16	13	10	10	12	10	10	12	7	7	9	50.1	50.1	42.1	49.005	425	425;432;429;439;372;160;431;457;427;429;434;126;136;369;82;267	1	184	0	114.52	32.9	32.9	38.6	6945800000	626480000	464440000	618520000	9	8	6	112
D6RGY8;D6RFI3;E7EQR8;Q9GZM5;H0Y9A1	D6RGY8;D6RFI3;E7EQR8;Q9GZM5;H0Y9A1	3;3;3;3;2	3;3;3;3;2	3;3;3;3;2	59034000	67726000	63751000	Protein YIPF3;Protein YIPF3, 36 kDa form III	YIPF3	;;;;	5	3	3	3	2	2	3	2	2	3	2	2	3	39.4	39.4	39.4	12.29	109	109;262;356;350;135	1	28	0	10.979	29.4	18.3	39.4	710400000	61766000	64120000	77305000	1	1	2	13
D6RHW1;D6RIY1;D6RGK3;D6RIV9;D6RIE8;Q9HBM6;Q16594	D6RHW1;D6RIY1;D6RGK3;D6RIV9;D6RIE8;Q9HBM6;Q16594	2;2;2;2;2;2;2	2;2;2;2;2;2;2	2;2;2;2;2;2;2	0	17350000	15546000	Transcription initiation factor TFIID subunit 9B;Transcription initiation factor TFIID subunit 9	TAF9;TAF9B	;;;;;;	7	2	2	2	1	2	2	1	2	2	1	2	2	18.6	18.6	18.6	11.57	102	102;127;135;166;197;251;264	1	20	0.00025767	3.0517	7.8	18.6	18.6	157990000	8542200	15981000	13418000	1	1	1	15
D6RIE3;P14406;D6RGV5;H0UI06;D6R9C3;D6RA35	D6RIE3;P14406;D6RGV5;H0UI06	3;3;2;2;1;1	3;3;2;2;1;1	3;3;2;2;1;1	190970000	0	70137000	Cytochrome c oxidase subunit 7A2, mitochondrial	COX7A2	;;;	6	3	3	3	2	2	3	2	2	3	2	2	3	34.1	34.1	34.1	10.264	91	91;83;103;115;53;76	1	29	0	8.9087	25.3	25.3	34.1	1510800000	164890000	62952000	93157000	1	2	2	24
D6RIW8;Q9NW82	D6RIW8;Q9NW82	3;3	3;3	3;3	25198000	0	31949000	WD repeat-containing protein 70	WDR70	;	2	3	3	3	2	1	2	2	1	2	2	1	2	13.7	13.7	13.7	43.24	387	387;654	1	21	0	6.4632	6.2	3.1	6.2	223630000	25504000	13579000	28888000	1	1	2	15
D6RIY6;Q06265;Q06265-2;D6R905;Q06265-3;Q06265-4;D6RAP4;D6RA17;H0Y9L5	D6RIY6;Q06265;Q06265-2;D6R905;Q06265-3;Q06265-4	5;5;5;3;3;3;2;2;1	5;5;5;3;3;3;2;2;1	5;5;5;3;3;3;2;2;1	114640000	116550000	127650000	Exosome complex component RRP45	EXOSC9	;;;;;	9	5	5	5	4	4	4	4	4	4	4	4	4	14.4	14.4	14.4	46.977	423	423;439;456;226;355;372;86;242;172	1	57	0	12.491	11.8	10.6	10.6	1508100000	95487000	105420000	137190000	3	1	3	30
E1P5H9;Q96BD0-3;Q96BD0-4;Q96BD0;Q96BD0-2	E1P5H9;Q96BD0-3;Q96BD0-4;Q96BD0	3;3;3;3;1	3;3;3;3;1	3;3;3;3;1	35535000	47823000	0	Solute carrier organic anion transporter family member 4A1	SLCO4A1	;;;	5	3	3	3	3	3	1	3	3	1	3	3	1	4.7	4.7	4.7	65.837	620	620;661;722;722;583	1	24	0.0002578	3.0569	4.7	4.7	1.3	328250000	40558000	41993000	15802000	1	1	0	7
E2QRB3;P32322-2;P32322;P32322-3;J3QR88;J3QLK9;J3QL23;J3QL32;J3QL24;J3KQ22;J3QKT4;J3KTA8;J3QKT3;J3QRZ0;J3KSA9	E2QRB3;P32322-2;P32322;P32322-3;J3QR88;J3QLK9;J3QL23;J3QL32;J3QL24;J3KQ22;J3QKT4	6;6;6;6;4;4;4;4;4;4;3;2;2;2;1	5;5;5;5;4;4;4;4;4;4;2;2;2;2;1	5;5;5;5;4;4;4;4;4;4;2;2;2;2;1	54983000	56878000	62250000	Pyrroline-5-carboxylate reductase 1, mitochondrial;Pyrroline-5-carboxylate reductase	PYCR1	;;;;;;;;;;	15	6	5	5	5	4	4	4	3	3	4	3	3	30.2	25.7	25.7	30.213	288	288;316;319;346;132;165;173;217;225;253;242;84;94;115;109	1	37	0	7.4162	26.7	20.8	18.4	666860000	70645000	60476000	42100000	2	1	2	18
E2QRF9;O75496;H7C608;C9K0U5	E2QRF9;O75496;H7C608	3;3;2;1	3;3;2;1	3;3;2;1	44616000	47738000	57663000	Geminin	GMNN	;;	4	3	3	3	3	2	2	3	2	2	3	2	2	29.6	29.6	29.6	20.539	179	179;209;102;65	1	27	0	14.272	29.6	19.6	19.6	528300000	54014000	37443000	61256000	2	2	0	16
E2QRG3;H0Y718;F6VGH2;E7EUN7;Q6ZMV9-3;Q6ZMV9	E2QRG3;H0Y718;F6VGH2;E7EUN7;Q6ZMV9-3;Q6ZMV9	2;2;2;2;2;2	1;1;1;1;1;1	1;1;1;1;1;1	9047100	0	0	Kinesin-like protein;Kinesin-like protein KIF6	KIF6	;;;;;	6	2	1	1	1	0	0	1	0	0	1	0	0	2.9	1.2	1.2	74.246	653	653;689;758;797;797;814	1	1	1	-2	1.2	0	0	9047100	9047100	0	0	0	0	0	0
E2QRH7;Q9NYP7;Q9NYP7-2;Q9NYP7-3	E2QRH7;Q9NYP7;Q9NYP7-2	3;3;3;1	3;3;3;1	3;3;3;1	0	177440000	148810000	Elongation of very long chain fatty acids protein 5	ELOVL5	;;	4	3	3	3	1	2	3	1	2	3	1	2	3	10.4	10.4	10.4	34.202	289	289;299;326;88	1	30	0	21.781	3.1	7.6	10.4	1665500000	16414000	116320000	175090000	0	1	1	8
E2QRM6;Q9H2U2;Q9H2U2-2;H0Y9D8;Q9H2U2-6;Q9H2U2-3;D6R967;D6RGV9;B4DFH3;Q9H2U2-4;D6RGI1;H0YAK2;D6RAD3	E2QRM6;Q9H2U2;Q9H2U2-2;H0Y9D8;Q9H2U2-6;Q9H2U2-3;D6R967	12;12;12;8;8;8;7;5;5;5;2;1;1	12;12;12;8;8;8;7;5;5;5;2;1;1	12;12;12;8;8;8;7;5;5;5;2;1;1	687690000	768710000	828280000	Inorganic pyrophosphatase 2, mitochondrial	PPA2	;;;;;;	13	12	12	12	9	12	11	9	12	11	9	12	11	48.7	48.7	48.7	35.731	316	316;334;349;226;232;305;191;195;202;168;88;69;113	1	193	0	41.836	35.8	48.7	44.3	9327800000	483530000	833810000	784850000	8	9	9	102
E5KLJ6;E5KLJ5;O60313;O60313-2;E5KLK1;E5KLJ9;H7C141;H7C321;C9JY58;C9JMB8	E5KLJ6;E5KLJ5;O60313;O60313-2;E5KLK1;E5KLJ9	15;15;15;15;14;14;3;2;1;1	15;15;15;15;14;14;3;2;1;1	15;15;15;15;14;14;3;2;1;1	214170000	192430000	206510000	Dynamin-like 120 kDa protein, mitochondrial;Dynamin-like 120 kDa protein, form S1	OPA1	;;;;;	10	15	15	15	14	11	9	14	11	9	14	11	9	19.1	19.1	19.1	113.49	978	978;1015;960;997;961;979;183;185;84;243	1	148	0	34.683	17.4	12.7	10	2391300000	251050000	179000000	176460000	9	3	1	54
E5RFP0;Q8WVJ2	E5RFP0;Q8WVJ2	4;4	4;4	4;4	128830000	106080000	137990000	NudC domain-containing protein 2	NUDCD2	;	2	4	4	4	3	4	4	3	4	4	3	4	4	36.4	36.4	36.4	14.745	132	132;157	1	40	0	9.5474	28.8	36.4	36.4	1217600000	98056000	135070000	150790000	2	3	2	24
E5RG17;Q6P1N9;G5EA19;U3KQS5;E5RGF2;Q6P1N9-2;H0YBX2;E5RG62;E5RK70;E5RH86	E5RG17;Q6P1N9;G5EA19;U3KQS5;E5RGF2;Q6P1N9-2;H0YBX2	5;5;4;4;4;4;3;2;2;1	5;5;4;4;4;4;3;2;2;1	5;5;4;4;4;4;3;2;2;1	68427000	64297000	63540000	Putative deoxyribonuclease TATDN1	TATDN1	;;;;;;	10	5	5	5	3	2	3	3	2	3	3	2	3	18.9	18.9	18.9	36.418	322	322;297;207;210;210;250;202;93;110;40	1	38	0	13.428	11.5	8.4	12.4	869500000	87566000	38812000	65136000	2	1	3	22
E5RGS9;Q9NRG0	E5RGS9;Q9NRG0	3;3	3;3	3;3	122650000	63568000	61563000	Chromatin accessibility complex protein 1	CHRAC1	;	2	3	3	3	2	3	3	2	3	3	2	3	3	58.9	58.9	58.9	6.2643	56	56;131	1	36	0	10.811	46.4	58.9	58.9	966490000	76488000	66060000	71744000	2	1	0	12
E5RHG8;Q15369;Q15369-2;R4GMY8	E5RHG8;Q15369;Q15369-2;R4GMY8	6;6;5;3	6;6;5;3	6;6;5;3	1408200000	1125400000	1235900000	Transcription elongation factor B polypeptide 1	TCEB1	;;;	4	6	6	6	6	6	6	6	6	6	6	6	6	82	82	82	9.9601	89	89;112;96;65	1	117	0	131.97	82	82	82	15246000000	1453500000	922560000	1259200000	8	7	10	93
E5RHW4;O94905;E5RJ09;O94905-2;O94905-3	E5RHW4;O94905;E5RJ09	11;11;6;2;2	11;11;6;2;2	8;8;5;1;1	454370000	513840000	485290000	Erlin-2	ERLIN2	;;	5	11	11	8	10	10	11	10	10	11	7	7	8	39.3	39.3	30.2	37.725	338	338;339;197;152;206	1	133	0	75.507	36.7	34.3	39.3	5912000000	461370000	497090000	489950000	5	7	5	75
E5RIM7;O00244;E5RGN3	E5RIM7;O00244;E5RGN3	4;4;3	4;4;3	4;4;3	439150000	344150000	328510000	Copper transport protein ATOX1	ATOX1	;;	3	4	4	4	4	4	4	4	4	4	4	4	4	71.2	71.2	71.2	7.8741	73	73;68;59	1	51	0	65.317	71.2	71.2	71.2	4345800000	461860000	314700000	331360000	3	3	3	40
E5RIP4;Q15043-2;Q15043-3;Q15043;E5RFZ8;E5RGA7;E5RJ40;E5RJG5	E5RIP4;Q15043-2;Q15043-3;Q15043;E5RFZ8;E5RGA7;E5RJ40;E5RJG5	3;3;3;3;2;2;2;2	3;3;3;3;2;2;2;2	3;3;3;3;2;2;2;2	461810000	411690000	409800000	Zinc transporter ZIP14	SLC39A14	;;;;;;;	8	3	3	3	3	3	3	3	3	3	3	3	3	29	29	29	17	155	155;481;492;492;89;90;122;127	1	53	0	78.962	29	29	29	5101500000	497520000	557490000	532980000	4	7	5	44
E5RIW3;E5RJD8;O75347;E5RHG6;B4DT30;E5RIX8	E5RIW3;E5RJD8;O75347;E5RHG6;B4DT30	10;10;10;8;7;3	10;10;10;8;7;3	10;10;10;8;7;3	1473300000	1423400000	1488400000	Tubulin-specific chaperone A	TBCA	;;;;	6	10	10	10	10	9	9	10	9	9	10	9	9	76.2	76.2	76.2	10.08	84	84;119;108;131;129;79	1	152	0	80.583	76.2	67.9	67.9	17443000000	1626100000	1242600000	1441300000	8	8	11	105
E5RJR5;P63208;E7ERH2;F8W8N3;P63208-2;E5RGM3;E5RHM3;E5RGM4	E5RJR5;P63208;E7ERH2;F8W8N3;P63208-2	11;11;8;8;8;5;1;1	11;11;8;8;8;5;1;1	9;9;6;6;6;3;0;0	693170000	707670000	968160000	S-phase kinase-associated protein 1	SKP1	;;;;	8	11	11	9	11	9	10	11	9	10	9	7	8	77.3	77.3	49.7	18.72	163	163;163;142;158;160;102;39;41	1	141	0	81.243	77.3	77.3	69.9	9500800000	853460000	689010000	881890000	8	6	8	76
E7EM64;Q7L5N1;H7C3T0	E7EM64;Q7L5N1	12;12;3	12;12;3	12;12;3	624610000	649300000	648920000	COP9 signalosome complex subunit 6	COPS6	;	3	12	12	12	12	12	12	12	12	12	12	12	12	46.9	46.9	46.9	36.064	326	326;327;123	1	186	0	82.993	46.9	46.9	46.9	7663500000	697060000	603150000	732730000	9	5	8	91
E7EMM4;Q13510;Q13510-2;E7ERV9;Q13510-3	E7EMM4;Q13510;Q13510-2;E7ERV9;Q13510-3	5;5;5;4;3	5;5;5;4;3	5;5;5;4;3	78831000	89663000	91543000	Acid ceramidase;Acid ceramidase subunit alpha;Acid ceramidase subunit beta	ASAH1	;;;;	5	5	5	5	4	4	5	4	4	5	4	4	5	18.1	18.1	18.1	41.796	370	370;395;411;305;389	1	50	0	7.6369	14.9	14.9	18.1	1009900000	77746000	98032000	103730000	1	1	4	19
E7EN19;E7ESS2;E7ENQ1;G3XAA2;H7C360;O95819-4;O95819-2;O95819-5;G5E948;O95819;O95819-3;E7EX83;C9J840;H7C0P6;Q9UKE5-7;Q9UKE5-3;Q9UKE5-4;Q9UKE5;F5H5M9;Q9UKE5-8;Q9UKE5-5;Q9UKE5-6;Q9UKE5-2;C9J338;F5H865;H7C3Z6;E7ETN6	E7EN19;E7ESS2;E7ENQ1;G3XAA2;H7C360;O95819-4;O95819-2;O95819-5;G5E948;O95819;O95819-3;E7EX83;C9J840;H7C0P6	17;17;16;16;16;16;16;16;15;15;15;12;12;10;6;6;6;6;5;5;5;5;5;4;4;2;1	17;17;16;16;16;16;16;16;15;15;15;12;12;10;6;6;6;6;5;5;5;5;5;4;4;2;1	10;10;9;9;9;9;9;9;8;8;8;7;7;7;0;0;0;0;0;0;0;0;0;0;0;1;0	183650000	203130000	178470000	Mitogen-activated protein kinase kinase kinase kinase 4	MAP4K4	;;;;;;;;;;;;;	27	17	17	10	11	15	12	11	15	12	8	9	8	17.6	17.6	13.1	144.92	1272	1272;1279;1154;1166;1170;1165;1211;1242;1320;1239;1319;1038;1042;1056;1297;1305;1352;1360;1312;1268;1276;1323;1331;350;1338;258;102	1	158	0	33.495	12.7	16	13.1	2379500000	181510000	210510000	196260000	3	7	7	58
E7ENC1;F8WBI9;E7ETT4;E7EUY3;E7ETT1;E9PDR0;C9JQS9;E7EX59;P05166;P05166-2;C9JVY9;E9PEC3;H7C5C9	E7ENC1;F8WBI9;E7ETT4;E7EUY3;E7ETT1;E9PDR0;C9JQS9;E7EX59;P05166;P05166-2;C9JVY9;E9PEC3	3;3;3;3;3;3;3;3;3;3;2;2;1	3;3;3;3;3;3;3;3;3;3;2;2;1	3;3;3;3;3;3;3;3;3;3;2;2;1	221750000	0	0	Propionyl-CoA carboxylase beta chain, mitochondrial	PCCB	;;;;;;;;;;;	13	3	3	3	3	1	1	3	1	1	3	1	1	14.2	14.2	14.2	32.468	303	303;405;482;516;520;550;559;570;539;559;191;423;163	1	28	0	4.5658	14.2	2.3	2.3	2695700000	419060000	168680000	198690000	2	0	0	7
E7ENU4;P55265;P55265-4;P55265-5;H0YCK3;P55265-3;P55265-2	E7ENU4;P55265;P55265-4;P55265-5;H0YCK3;P55265-3;P55265-2	22;22;22;21;20;20;20	22;22;22;21;20;20;20	22;22;22;21;20;20;20	390680000	411570000	377330000	Double-stranded RNA-specific adenosine deaminase	ADAR	;;;;;;	7	22	22	22	14	18	18	14	18	18	14	18	18	21.7	21.7	21.7	140.83	1269	1269;1226;1269;931;1195;1181;1200	1	221	0	65.971	15.1	18	18	4854200000	289430000	439480000	396260000	8	9	7	96
E7EP00;G5EA31;P53992;B4DZT4	E7EP00;G5EA31;P53992	17;17;17;6	17;17;17;6	17;17;17;6	441360000	462320000	457710000	Protein transport protein Sec24C	SEC24C	;;	4	17	17	17	15	15	15	15	15	15	15	15	15	25.3	25.3	25.3	106.62	975	975;1042;1094;342	1	211	0	57.178	21.8	21.5	21.5	5309700000	404810000	438310000	514040000	12	9	8	106
E7EP42;E9PB91;B1APJ0;O14925;Q5SRD1;H0Y6X5;S4R2X5	E7EP42;E9PB91;B1APJ0;O14925;Q5SRD1;H0Y6X5;S4R2X5	2;2;2;2;2;1;1	2;2;2;2;2;1;1	2;2;2;2;2;1;1	39813000	0	32474000	Mitochondrial import inner membrane translocase subunit Tim23;Putative mitochondrial import inner membrane translocase subunit Tim23B	TIMM23B;TIMM23	;;;;;;	7	2	2	2	2	1	1	2	1	1	2	1	1	49.6	49.6	49.6	12.701	123	123;161;172;209;257;107;118	1	18	0	13.733	49.6	16.3	16.3	229010000	40303000	3848100	25584000	2	0	0	7
E7EPB3;P50914	E7EPB3;P50914	6;6	6;6	6;6	2522800000	2683300000	2238400000	60S ribosomal protein L14	RPL14	;	2	6	6	6	6	5	6	6	5	6	6	5	6	44.4	44.4	44.4	14.558	124	124;215	1	111	0	14.814	44.4	38.7	44.4	27983000000	2748300000	2234600000	2220500000	5	5	7	66
E7EPN9;Q9Y520-6;Q9Y520-4;Q9Y520-5;Q9Y520;Q9Y520-7;Q9Y520-3;Q9Y520-2;H7C5N8	E7EPN9;Q9Y520-6;Q9Y520-4;Q9Y520-5;Q9Y520;Q9Y520-7;Q9Y520-3;Q9Y520-2	29;29;29;29;29;29;27;26;7	29;29;29;29;29;29;27;26;7	28;28;28;28;28;28;26;26;7	609220000	622510000	643350000	Protein PRRC2C	PRRC2C	;;;;;;;	9	29	29	28	23	21	24	23	21	24	22	20	23	13.7	13.7	13.4	308.77	2819	2819;2752;2817;2849;2896;2898;2700;2653;1300	1	307	0	46.98	11.4	9.5	11.4	7414300000	631630000	501970000	736370000	7	8	10	120
E7EPV7;P37840-2;P37840;P37840-3;D6RA31;Q16143	E7EPV7;P37840-2;P37840;P37840-3;D6RA31	6;6;6;4;3;1	6;6;6;4;3;1	6;6;6;4;3;1	748670000	676970000	692000000	Alpha-synuclein	SNCA	;;;;	6	6	6	6	6	6	6	6	6	6	6	6	6	60	60	60	11.777	115	115;112;140;126;66;134	1	105	0	177.22	60	60	60	8305400000	698000000	635760000	677420000	7	4	5	63
E7EPW2;B4DQG6;B4DFJ5;P82663	E7EPW2;B4DQG6;B4DFJ5;P82663	3;3;3;3	3;3;3;3	3;3;3;3	55014000	66481000	49985000	28S ribosomal protein S25, mitochondrial	MRPS25	;;;	4	3	3	3	3	3	3	3	3	3	3	3	3	38.2	38.2	38.2	12.946	110	110;129;145;173	1	32	0	12.479	38.2	38.2	38.2	665250000	55138000	62175000	56874000	2	1	0	9
E7EQ69;Q9GZZ1;C9J5D1;Q9GZZ1-2;B0AZT5;C9JZU6;C9J5J3;F8WCK0	E7EQ69;Q9GZZ1;C9J5D1;Q9GZZ1-2;B0AZT5	12;12;10;8;6;4;4;3	12;12;10;8;6;4;4;3	12;12;10;8;6;4;4;3	254460000	168030000	143830000	N-alpha-acetyltransferase 50	NAA50	;;;;	8	12	12	12	10	7	5	10	7	5	10	7	5	64.3	64.3	64.3	19.311	168	168;169;129;81;95;57;58;48	1	100	0	39.767	57.1	36.9	31	2297600000	310510000	192900000	113000000	9	1	2	47
E7EQS0;P20839;P20839-3;P20839-7;P20839-5;P20839-6;C9K0R9;C9J381;P20839-2;P20839-4	E7EQS0;P20839;P20839-3;P20839-7;P20839-5;P20839-6;C9K0R9;C9J381;P20839-2;P20839-4	4;4;4;4;4;4;3;3;3;3	3;3;3;3;3;3;2;2;2;2	3;3;3;3;3;3;2;2;2;2	49631000	38368000	49213000	Inosine-5-monophosphate dehydrogenase 1;Inosine-5-monophosphate dehydrogenase	IMPDH1	;;;;;;;;;	10	4	3	3	2	3	3	2	2	2	2	2	2	10.9	9.4	9.4	57.015	530	530;514;563;566;589;599;289;513;489;509	1	28	0	13.961	7.4	8.9	8.9	544600000	44468000	28531000	40278000	2	0	1	15
E7ER89;O95340;O95340-2	E7ER89;O95340;O95340-2	7;7;7	7;7;7	7;7;7	153640000	135270000	164340000	Bifunctional 3-phosphoadenosine 5-phosphosulfate synthase 2;Sulfate adenylyltransferase;Adenylyl-sulfate kinase	PAPSS2	;;	3	7	7	7	5	7	6	5	7	6	5	7	6	15	15	15	69.997	618	618;614;619	1	110	0	17.752	11	15	13.3	1782800000	166290000	149830000	149700000	5	3	5	38
E7ERB7;B7ZLZ0;Q9P107;K7EJC2	E7ERB7;B7ZLZ0;Q9P107	5;5;5;2	5;5;5;2	5;5;5;2	38320000	0	0	GEM-interacting protein	GMIP	;;	4	5	5	5	3	2	1	3	2	1	3	2	1	7.1	7.1	7.1	103.7	941	941;944;970;303	1	27	0	8.3469	4.6	3.3	1	275760000	44739000	19264000	0	2	0	1	12
E7ERH3;Q68CZ2-2;Q68CZ2;Q68CZ2-4;Q68CZ2-3;C9JHU5;E9PCX8;C9JWN9;C9JTD0	E7ERH3;Q68CZ2-2;Q68CZ2;Q68CZ2-4;Q68CZ2-3;C9JHU5;E9PCX8	6;6;6;4;4;3;3;2;2	6;6;6;4;4;3;3;2;2	6;6;6;4;4;3;3;2;2	69309000	0	58817000	Tensin-3	TNS3	;;;;;;	9	6	6	6	6	2	5	6	2	5	6	2	5	8.5	8.5	8.5	129.07	1205	1205;1205;1445;250;391;544;1249;108;138	1	57	0	12.711	8.5	3.1	6.1	798210000	76887000	32205000	63402000	2	1	1	17
E7ERI8;E7EW49;F5H604;E3W994;J3KR49;O75122;E9PBA6;F5H3X0;H7C4X8;H7C5M8;H7C4I5;B3KR06;E7ENG2;O75122-2;C9J668;D6RBU8	E7ERI8;E7EW49;F5H604;E3W994;J3KR49;O75122;E9PBA6;F5H3X0	15;15;15;14;13;13;12;11;4;3;2;2;2;2;1;1	15;15;15;14;13;13;12;11;4;3;2;2;2;2;1;1	11;11;11;10;9;9;8;8;3;2;2;2;2;2;1;1	135480000	140970000	126080000	CLIP-associating protein 2	CLASP2	;;;;;;;	16	15	15	11	12	10	10	12	10	10	8	7	7	12.1	12.1	9.5	165.63	1513	1513;1514;1505;1273;1293;1294;995;1063;184;220;205;454;458;431;178;233	1	136	0	27.081	10	8.1	8.6	1717900000	151530000	131080000	148820000	7	4	4	58
E7ERK9;Q9UI10-3;Q9UI10;Q9UI10-2;H7C2L8;F8W8L6	E7ERK9;Q9UI10-3;Q9UI10;Q9UI10-2;H7C2L8	4;4;4;4;2;1	4;4;4;4;2;1	4;4;4;4;2;1	40955000	51116000	36438000	Translation initiation factor eIF-2B subunit delta	EIF2B4	;;;;	6	4	4	4	2	2	3	2	2	3	2	2	3	13.6	13.6	13.6	59.714	544	544;522;523;543;194;235	1	35	0	13.158	7.7	7.7	11.2	496280000	31858000	41129000	37243000	1	1	0	18
E7ERU0;E9PHM6;F8W9J4;E7ERU2;E9PEB9;Q03001;J3QTQ0;Q03001-8;E7ETB9;F6QMI7;Q03001-9;Q6P0N6;Q03001-13;Q5T0V7;O15169-2;O15169	E7ERU0;E9PHM6;F8W9J4;E7ERU2;E9PEB9;Q03001;J3QTQ0;Q03001-8;E7ETB9;F6QMI7;Q03001-9	6;6;6;6;6;6;5;5;4;4;3;2;2;1;1;1	4;4;4;4;4;4;3;3;3;3;2;2;2;1;0;0	2;2;2;2;2;2;1;1;1;1;0;0;1;1;0;0	0	483600000	0	Dystonin	DST	;;;;;;;;;;	16	6	4	2	2	3	3	1	2	2	0	1	1	1.2	0.8	0.4	615.65	5375	5375;5457;7461;7572;7750;7570;7246;5171;1479;4200;3060;1143;905;689;826;862	1	13	0.00026624	3.4812	0.3	0.7	0.7	2262300000	26359000	443600000	38452000	1	0	2	6
E7ES43;O95757;E9PDE8;D6RJ96	E7ES43;O95757;E9PDE8;D6RJ96	30;30;28;17	26;26;24;13	26;26;24;13	714910000	667540000	717880000	Heat shock 70 kDa protein 4L	HSPA4L	;;;	4	30	26	26	24	26	25	20	22	21	20	22	21	44.3	38.4	38.4	97.658	870	870;839;813;531	1	283	0	206.48	35.5	38.4	38.7	9110700000	699210000	707670000	774150000	13	13	17	145
E7ES96;P49768-2;P49768;P49768-3;P49768-5;P49768-6;P49768-7;G3V3Z0;E5RFW4;G3V499;G3V2G7;E5RG63;E5RJ26;B1AP22;P49768-4;P49810-3;P49810	E7ES96;P49768-2;P49768;P49768-3;P49768-5;P49768-6;P49768-7	3;3;3;2;2;2;2;1;1;1;1;1;1;1;1;1;1	3;3;3;2;2;2;2;1;1;1;1;1;1;1;1;1;1	3;3;3;2;2;2;2;1;1;1;1;1;1;1;1;1;1	0	25722000	0	Presenilin;Presenilin-1;Presenilin-1 NTF subunit;Presenilin-1 CTF subunit;Presenilin-1 CTF12	PSEN1	;;;;;;	17	3	3	3	1	2	1	1	2	1	1	2	1	12.5	12.5	12.5	42.082	375	375;463;467;374;378;409;434;135;144;147;155;304;360;481;184;447;448	1	18	0	11.722	5.1	10.1	5.1	168300000	9674900	23575000	11733000	1	3	1	13
E7ESC6;E9PEN8;Q9UIA9;E5RIW1;H0YBE1	E7ESC6;E9PEN8;Q9UIA9	19;19;19;6;4	19;19;19;6;4	18;18;18;6;4	287410000	307370000	316960000	Exportin-7	XPO7	;;	5	19	19	18	14	13	14	14	13	14	13	12	13	20.7	20.7	19.7	124.07	1088	1088;1096;1087;237;190	1	181	0	45.01	15.7	14.3	15.2	3891800000	379970000	334900000	301240000	9	6	7	82
E7ESK6;E9PBI9;P34741;E5RJB8;E5RHU3	E7ESK6;E9PBI9;P34741;E5RJB8;E5RHU3	2;2;2;1;1	2;2;2;1;1	2;2;2;1;1	29690000	0	0	Syndecan;Syndecan-2	SDC2	;;;;	5	2	2	2	2	1	1	2	1	1	2	1	1	14.5	14.5	14.5	18.388	165	165;172;201;137;145	1	18	0.00026035	3.2032	14.5	5.5	9.1	318420000	33619000	21252000	11124000	0	0	1	5
E7ESL0;J3KQY1;Q9NWU5-2;Q9NWU5-3;Q9NWU5	E7ESL0;J3KQY1;Q9NWU5-2;Q9NWU5-3;Q9NWU5	3;3;3;3;3	3;3;3;3;3	3;3;3;3;3	56264000	50387000	0	39S ribosomal protein L22, mitochondrial	MRPL22	;;;;	5	3	3	3	3	2	1	3	2	1	3	2	1	19.3	19.3	19.3	24.325	212	212;232;120;126;206	1	19	0	8.9164	19.3	13.2	6.1	379840000	68950000	42308000	0	2	2	1	15
E7ESP4;E7EMF1;E9PB77;D6RG08	E7ESP4;E7EMF1;E9PB77	26;22;15;3	1;1;1;0	1;1;1;0	145700000	175080000	194160000		ITGA2	;;	4	26	1	1	22	23	24	1	1	1	1	1	1	37.9	2.1	2.1	102.83	942	942;815;641;175	1	24	0	83.367	33.8	35.2	35.9	2067700000	148650000	147660000	186110000	2	2	3	20
E7EST9;B5MEG5;O94966-7;O94966-6;O94966-5;E7ESU0;O94966-4;O94966-3;O94966;O94966-2	E7EST9;B5MEG5;O94966-7;O94966-6;O94966-5;E7ESU0;O94966-4;O94966-3;O94966	6;6;6;6;6;5;5;5;5;2	6;6;6;6;6;5;5;5;5;2	6;6;6;6;6;5;5;5;5;2	0	0	26369000	Ubiquitin carboxyl-terminal hydrolase;Ubiquitin carboxyl-terminal hydrolase 19	USP19	;;;;;;;;	10	6	6	6	2	0	5	2	0	5	2	0	5	6.1	6.1	6.1	145.56	1321	1321;1358;1372;1384;1419;1089;1268;1281;1318;660	1	33	0	4.2529	1.4	0	4.8	220210000	17883000	0	37742000	0	0	1	7
E7ESZ7;O95299;Q8WXC9;C9J6X0;H7C2W5;H7C1Y7;H7C2X4;Q8N1B9	E7ESZ7;O95299;Q8WXC9;C9J6X0	5;5;5;3;2;2;2;2	5;5;5;3;2;2;2;2	5;5;5;3;2;2;2;2	64851000	61510000	80697000	NADH dehydrogenase [ubiquinone] 1 alpha subcomplex subunit 10, mitochondrial	NDUFA10	;;;	8	5	5	5	4	3	3	4	3	3	4	3	3	21	21	21	44.738	390	390;355;429;244;129;133;138;201	1	34	0	22.919	14.6	11.8	11.8	710410000	88659000	53202000	52147000	0	1	1	17
E7ET49;Q8NCG7-2;Q8NCG7-4;Q8NCG7;B4DVJ1;E7EVQ4	E7ET49;Q8NCG7-2;Q8NCG7-4;Q8NCG7	5;5;5;5;2;2	5;5;5;5;2;2	5;5;5;5;2;2	29314000	37302000	30161000	Sn1-specific diacylglycerol lipase beta	DAGLB	;;;	6	5	5	5	3	2	3	3	2	3	3	2	3	11.4	11.4	11.4	68.951	631	631;391;543;672;220;379	1	43	0	8.7351	6.8	4	5.7	467340000	32944000	25391000	20459000	2	0	2	21
E7ETB3;Q9ULA0;E7EPX3;B9ZVU2;F8WAN0;C9JBE1;E7EMB6;E5RJ35;C9JRG3;C9J1E2	E7ETB3;Q9ULA0;E7EPX3;B9ZVU2;F8WAN0;C9JBE1;E7EMB6	5;5;4;4;4;4;3;2;2;2	5;5;4;4;4;4;3;2;2;2	5;5;4;4;4;4;3;2;2;2	66422000	58448000	64807000	Aspartyl aminopeptidase	DNPEP	;;;;;;	10	5	5	5	2	3	4	2	3	4	2	3	4	12.6	12.6	12.6	54.53	493	493;475;224;270;273;331;410;89;117;137	1	49	0	9.8983	4.9	6.9	10.1	778730000	51961000	37708000	71325000	1	1	2	18
E7ETK0;P62847-2;P62847-3;P62847;P62847-4	E7ETK0;P62847-2;P62847-3;P62847;P62847-4	6;6;6;6;6	6;6;6;6;6	6;6;6;6;6	1961100000	1846100000	1732500000	40S ribosomal protein S24	RPS24	;;;;	5	6	6	6	5	5	5	5	5	5	5	5	5	41.2	41.2	41.2	15.197	131	131;130;132;133;289	1	153	0	43.261	35.9	35.9	35.9	24631000000	1868500000	1762800000	1946300000	12	12	13	138
E7ETU5;B4DN88;P29558-2;P29558;E7EPF2;C9J9B2;J3QT21;C9JIJ9;Q6XE24-3;Q6XE24-4;Q6XE24-5;Q6XE24-2;Q6XE24	E7ETU5;B4DN88;P29558-2;P29558;E7EPF2	3;3;3;3;2;1;1;1;1;1;1;1;1	3;3;3;3;2;1;1;1;1;1;1;1;1	2;2;2;2;1;1;1;1;1;1;1;1;1	110150000	90300000	104310000	RNA-binding motif, single-stranded-interacting protein 1	RBMS1	;;;;	13	3	3	2	3	3	3	3	3	3	2	2	2	10.8	10.8	8.1	40.147	370	370;419;403;406;127;264;434;436;419;420;421;433;437	1	41	0	6.6767	10.8	10.8	10.8	1253600000	97800000	80644000	106120000	3	1	1	19
E7ETY7;Q8TED1	E7ETY7;Q8TED1	4;4	4;4	4;4	93150000	116600000	104770000	Glutathione peroxidase;Probable glutathione peroxidase 8	GPX8	;	2	4	4	4	4	4	4	4	4	4	4	4	4	29.1	29.1	29.1	18.09	158	158;209	1	60	0	6.1534	29.1	29.1	29.1	1374300000	102030000	132330000	112020000	2	2	1	19
E7ETZ4;Q9Y6E2;B5MCH7;B5MCE7;Q75MG1;E7EMS9;E9PFD4;C9JF98;F8WDX8	E7ETZ4;Q9Y6E2;B5MCH7;B5MCE7;Q75MG1	17;17;14;11;11;7;6;6;6	16;16;13;10;11;7;6;6;6	16;16;13;10;11;7;6;6;6	821840000	911010000	870790000	Basic leucine zipper and W2 domain-containing protein 2	BZW2	;;;;	9	17	16	16	15	16	17	14	15	16	14	15	16	39.7	38	38	46.913	408	408;419;343;225;274;208;161;162;170	1	235	0	89.148	36	37.7	39.7	11283000000	778430000	946120000	983580000	9	7	10	108
E7EU23;P50395;P50395-2;Q5SX87;V9GYF8;Q5SX90;Q5SX86;Q5SX91;V9GYJ7	E7EU23;P50395;P50395-2;Q5SX87	32;32;28;16;10;10;10;10;9	32;32;28;16;10;10;10;10;9	22;22;20;9;5;5;6;5;4	6447100000	6505700000	6528100000	Rab GDP dissociation inhibitor beta	GDI2	;;;	9	32	32	22	27	26	26	27	26	26	19	19	19	79.7	79.7	56.8	51.18	449	449;445;400;263;130;148;155;203;125	1	513	0	323.31	66.1	66.4	70.6	81876000000	6311300000	6135500000	6523000000	27	25	29	311
E7EU96;P68400;Q8NEV1;P68400-2;V9GYA2;V9GY80;V9GYW6	E7EU96;P68400;Q8NEV1;P68400-2	15;15;12;10;2;2;1	15;15;12;10;2;2;1	15;15;12;10;2;2;1	505730000	516270000	503700000	Casein kinase II subunit alpha;Casein kinase II subunit alpha 3	CSNK2A1;CSNK2A3	;;;	7	15	15	15	9	10	11	9	10	11	9	10	11	53.2	53.2	53.2	45.31	385	385;391;391;255;74;79;27	1	158	0	135.21	34.5	37.9	37.9	6210600000	521330000	465070000	561120000	9	5	6	82
E7EUI7;E7EMN6;P41236;Q6NXS1	E7EUI7;E7EMN6;P41236;Q6NXS1	4;4;4;2	4;4;4;2	4;4;4;2	67522000	69458000	52610000	Protein phosphatase inhibitor 2;Protein phosphatase inhibitor 2-like protein 3	PPP1R2;PPP1R2P3	;;;	4	4	4	4	4	2	4	4	2	4	4	2	4	70	70	70	8.9811	80	80;170;205;205	1	42	0	7.886	70	32.5	70	853650000	86344000	43867000	49830000	3	2	2	24
E7EUM5;Q7Z3B4-3;Q7Z3B4;Q7Z3B4-2	E7EUM5;Q7Z3B4-3;Q7Z3B4;Q7Z3B4-2	8;8;8;7	8;8;8;7	8;8;8;7	61491000	87729000	77445000	Nucleoporin p54	NUP54	;;;	4	8	8	8	3	5	7	3	5	7	3	5	7	30	30	30	37.349	327	327;459;507;291	1	61	0	12.331	12.5	19.6	25.7	856010000	36938000	74650000	97510000	2	1	3	21
E7EVA0;P27816;P27816-6;P27816-2;B9ZVR1;P27816-5;E9PGM5;P27816-4;B5MEG9;H7C4C5;H0Y2V1;B4DSQ1;H7C456;P27816-7	E7EVA0;P27816;P27816-6;P27816-2;B9ZVR1;P27816-5	49;43;42;35;27;26;22;21;17;15;12;9;8;3	49;43;42;35;27;26;22;21;17;15;12;9;8;3	37;31;30;23;17;16;10;10;9;5;0;0;8;3	2499700000	2683800000	2577900000	Microtubule-associated protein;Microtubule-associated protein 4	MAP4	;;;;;	14	49	49	37	42	42	42	42	42	42	31	31	31	25.9	25.9	20.3	245.44	2297	2297;1152;1135;979;811;809;887;872;711;493;463;249;290;99	1	598	0	249.84	22.7	22	21.7	31132000000	2555400000	2495100000	2515300000	26	25	30	314
E7EVC7;Q676U5-3;Q676U5-2;Q676U5;Q676U5-5;C9J8C6;C9JAY7;C9J1B2;Q676U5-4	E7EVC7;Q676U5-3;Q676U5-2;Q676U5;Q676U5-5	6;6;6;6;4;1;1;1;1	6;6;6;6;4;1;1;1;1	6;6;6;6;4;1;1;1;1	29334000	0	0	Autophagy-related protein 16-1	ATG16L1	;;;;	9	6	6	6	4	3	1	4	3	1	4	3	1	18.3	18.3	18.3	70.01	624	624;470;588;607;444;55;164;187;428	1	29	0	11.098	14.3	9.1	3.2	354080000	48485000	43004000	14141000	1	0	0	10
E7EVD1;O43395;B4DSY9	E7EVD1;O43395	8;8;3	8;8;3	8;8;3	108710000	115770000	91985000	U4/U6 small nuclear ribonucleoprotein Prp3	PRPF3	;	3	8	8	8	5	6	6	5	6	6	5	6	6	18.9	18.9	18.9	72.075	634	634;683;281	1	65	0	15.072	13.9	10.4	12	1206200000	90152000	111240000	101270000	3	1	1	25
E7EVL4;Q9H490-2;Q9H490	E7EVL4;Q9H490-2;Q9H490	2;2;2	2;2;2	2;2;2	60205000	0	0	Phosphatidylinositol glycan anchor biosynthesis class U protein	PIGU	;;	3	2	2	2	1	2	1	1	2	1	1	2	1	6.4	6.4	6.4	48.22	423	423;415;435	1	25	0	10.442	4	6.4	2.4	434980000	48877000	27419000	14819000	2	0	0	11
E7EVQ6;Q14534;H0YBN7;E5RJH9	E7EVQ6;Q14534	7;7;2;1	7;7;2;1	7;7;2;1	161420000	146650000	123670000	Squalene monooxygenase	SQLE	;	4	7	7	7	6	7	6	6	7	6	6	7	6	22.5	22.5	22.5	53.067	479	479;574;163;184	1	68	0	27.219	19.4	22.5	19.8	1920500000	176180000	159810000	145240000	4	4	2	36
E7EVX8;Q8WWY3;Q8WWY3-2;E7ESA8;E7EU94;E7ESX0;E7EN72;Q8WWY3-3	E7EVX8;Q8WWY3;Q8WWY3-2;E7ESA8;E7EU94;E7ESX0;E7EN72	10;10;6;6;5;5;5;4	10;10;6;6;5;5;5;4	10;10;6;6;5;5;5;4	101800000	109490000	97354000	U4/U6 small nuclear ribonucleoprotein Prp31	PRPF31	;;;;;;	8	10	10	10	9	5	7	9	5	7	9	5	7	35.5	35.5	35.5	54.766	493	493;499;364;450;260;276;284;278	1	82	0	20.081	33.5	12.8	19.7	1351600000	136540000	54480000	93999000	4	4	3	39
E7EW05;Q9NVU7;Q9NVU7-2	E7EW05;Q9NVU7;Q9NVU7-2	6;6;5	6;6;5	6;6;5	168970000	216760000	90559000	Protein SDA1 homolog	SDAD1	;;	3	6	6	6	4	4	5	4	4	5	4	4	5	9.1	9.1	9.1	75.44	650	650;687;590	1	54	0	5.9794	6.2	5.2	7.5	1571500000	291220000	323170000	363960000	1	1	1	18
E7EW20;Q9UM54-5;Q9UM54-2;Q9UM54-6;Q9UM54-4;Q9UM54-1;Q9UM54	E7EW20;Q9UM54-5;Q9UM54-2;Q9UM54-6;Q9UM54-4;Q9UM54-1;Q9UM54	5;5;5;5;5;5;5	5;5;5;5;5;5;5	5;5;5;5;5;5;5	124740000	0	0	Unconventional myosin-VI	MYO6	;;;;;;	7	5	5	5	4	1	2	4	1	2	4	1	2	4.7	4.7	4.7	148.83	1286	1286;1253;1262;1285;1285;1285;1294	1	31	0	7.7861	3.6	0.9	2	1340400000	101160000	32681000	48022000	2	1	0	11
E7EW69;B5ME97;Q9P0V9-3;Q9P0V9;Q9P0V9-2;E7EX04;B7Z371;B7Z277;C9JEQ7;F5H1W3;F8WC85;C9JEW2;C9JNR7;F5H1F2	E7EW69;B5ME97;Q9P0V9-3;Q9P0V9;Q9P0V9-2;E7EX04;B7Z371;B7Z277	13;13;13;13;13;12;8;7;2;1;1;1;1;1	12;12;12;12;12;11;7;6;2;1;1;1;1;1	12;12;12;12;12;11;7;6;2;1;1;1;1;1	406780000	346760000	402950000	Septin-10	10\Sep	;;;;;;;	14	13	12	12	13	13	11	12	12	10	12	12	10	42.2	38	38	52.145	450	450;544;431;454;503;473;321;283;97;38;48;57;61;98	1	151	0	116	42.2	42.2	34.4	5003400000	501270000	324620000	372140000	10	8	7	78
E7EWK3;Q9H2U1-3;Q9H2U1;F5GZS0;Q9H2U1-2	E7EWK3;Q9H2U1-3;Q9H2U1;F5GZS0;Q9H2U1-2	9;9;9;8;8	9;9;9;8;8	8;8;8;7;7	85600000	84661000	84355000	ATP-dependent RNA helicase DHX36	DHX36	;;;;	5	9	9	8	6	7	6	6	7	6	6	7	6	17.3	17.3	16.2	91.43	797	797;979;1008;994;994	1	68	0	32.257	11.4	13.3	11.4	1144500000	84820000	99861000	96751000	2	1	1	24
E7EX17;P23588;B4DS13;F8VX11;F8VSC7;F8VP89;F8W0K0;F8VYE9;F8VRU1	E7EX17;P23588;B4DS13;F8VX11	22;22;21;11;9;9;7;6;5	22;22;21;11;9;9;7;6;5	22;22;21;11;9;9;7;6;5	1110200000	1164800000	1233300000	Eukaryotic translation initiation factor 4B	EIF4B	;;;	9	22	22	22	19	16	19	19	16	19	19	16	19	39.9	39.9	39.9	69.697	616	616;611;572;360;227;275;169;185;175	1	278	0	136.38	34.1	28.1	35.9	13653000000	1101200000	820380000	1071100000	13	9	12	130
E7EX90;Q14203-3;Q14203-4;Q14203-6;Q14203;Q14203-5;Q14203-2;Q6AWB1;E7EWF7;C9JZA4;C9JTE5;C9JJN7;C9JJD0;C9JKG6;E9PCY0;C9J1B7	E7EX90;Q14203-3;Q14203-4;Q14203-6;Q14203;Q14203-5;Q14203-2;Q6AWB1	29;29;29;29;29;27;27;16;9;2;2;2;2;2;2;1	29;29;29;29;29;27;27;16;9;2;2;2;2;2;2;1	29;29;29;29;29;27;27;16;9;2;2;2;2;2;2;1	519110000	568720000	546460000	Dynactin subunit 1	DCTN1;DKFZp686E0752	;;;;;;;	16	29	29	29	19	22	21	19	22	21	19	22	21	32.2	32.2	32.2	139.09	1256	1256;1236;1253;1271;1278;1139;1144;890;191;76;76;87;121;135;186;64	1	284	0	105.33	21.6	25.1	23.1	6985100000	538940000	538360000	551940000	14	13	9	132
E9PAU2;Q8IY67-2;Q8IY67;K7EKR9;Q8IY67-3	E9PAU2;Q8IY67-2;Q8IY67	10;10;9;3;2	10;10;9;3;2	10;10;9;3;2	139050000	152210000	191330000	Ribonucleoprotein PTB-binding 1	RAVER1	;;	5	10	10	10	8	7	8	8	7	8	8	7	8	25.3	25.3	25.3	79.578	756	756;739;606;96;75	1	93	0	47.226	21.4	17.3	21.4	1860400000	176810000	116840000	186900000	3	3	3	41
E9PAV3;F8VZJ2;H0YHX9;Q13765;E9PAV3-2;F8W1N5;F8VNW4;F8W0W4;F8VZ58;Q9BZK3	E9PAV3;F8VZJ2;H0YHX9;Q13765;E9PAV3-2;F8W1N5;F8VNW4;F8W0W4	6;5;5;5;5;4;4;4;2;1	6;5;5;5;5;4;4;4;2;1	6;5;5;5;5;4;4;4;2;1	2942700000	2674100000	2514800000	Nascent polypeptide-associated complex subunit alpha, muscle-specific form;Nascent polypeptide-associated complex subunit alpha	NACA	;;;;;;;	10	6	6	6	5	4	5	5	4	5	5	4	5	3.4	3.4	3.4	205.42	2078	2078;136;213;215;925;71;148;198;126;213	1	105	0	131.7	2.7	2.4	2.7	31939000000	2937100000	2596000000	2499200000	5	6	8	78
E9PBL8;Q8WTW3;J3KSY3;J3QKY9;J3QLT5	E9PBL8;Q8WTW3	4;4;1;1;1	4;4;1;1;1	4;4;1;1;1	41084000	0	0	Conserved oligomeric Golgi complex subunit 1	COG1	;	5	4	4	4	3	0	0	3	0	0	3	0	0	6.5	6.5	6.5	107.16	962	962;980;26;102;126	1	14	0	4.2668	5.1	0	0	209190000	41084000	0	0	1	0	0	5
E9PC74;Q13144;C9JRD9	E9PC74;Q13144	8;8;1	8;8;1	8;8;1	73604000	73102000	71468000	Translation initiation factor eIF-2B subunit epsilon	EIF2B5	;	3	8	8	8	5	2	3	5	2	3	5	2	3	16	16	16	78.346	705	705;721;107	1	44	0	12.837	11.8	2.8	6	858300000	75420000	26940000	30391000	3	0	1	17
E9PD53;Q9NTJ3;Q9NTJ3-2;C9JR83;C9J578;C9JVD8;C9J9E4;C9JWF0;C9IYK2;C9JJ64;F8WCB7	E9PD53;Q9NTJ3;Q9NTJ3-2	34;34;31;12;5;4;4;2;2;2;1	34;34;31;12;5;4;4;2;2;2;1	34;34;31;12;5;4;4;2;2;2;1	756210000	783150000	722360000	Structural maintenance of chromosomes protein;Structural maintenance of chromosomes protein 4	SMC4	;;	11	34	34	34	28	23	23	28	23	23	28	23	23	31.3	31.3	31.3	144.45	1263	1263;1288;1230;423;139;119;157;170;173;180;50	1	315	0	172.17	25.7	20	20.3	8793800000	923880000	647830000	640160000	21	10	10	133
E9PDM3;P31641;C9JPV1;F8WF95;P31641-2	E9PDM3;P31641;C9JPV1;F8WF95;P31641-2	2;2;1;1;1	2;2;1;1;1	2;2;1;1;1	53177000	47422000	49558000	Sodium- and chloride-dependent taurine transporter;Transporter	SLC6A6	;;;;	5	2	2	2	2	2	2	2	2	2	2	2	2	7.2	7.2	7.2	40.516	359	359;620;109;112;200	1	23	0	9.2191	7.2	7.2	7.2	578820000	53128000	44880000	47321000	1	2	1	11
E9PDN5;P11532-3;P11532-2;P11532-4;P11532;E7EQS5;F8VX32;E7ESB2;H0Y304;P11532-8;P11532-7;P11532-5;P11532-6;F5GZY3;E7EQR9;P11532-10;P11532-9;H0Y3E8	E9PDN5;P11532-3;P11532-2;P11532-4;P11532;E7EQS5;F8VX32;E7ESB2;H0Y304;P11532-8;P11532-7;P11532-5;P11532-6;F5GZY3;E7EQR9;P11532-10;P11532-9	5;5;5;5;5;4;4;4;4;4;4;4;4;3;3;3;3;2	5;5;5;5;5;4;4;4;4;4;4;4;4;3;3;3;3;2	5;5;5;5;5;4;4;4;4;4;4;4;4;3;3;3;3;2	98860000	77421000	75700000	Dystrophin	DMD	;;;;;;;;;;;;;;;;	18	5	5	5	5	4	4	5	4	4	5	4	4	1.6	1.6	1.6	426.02	3681	3681;2341;2344;3677;3685;1225;1230;1243;1386;604;617;622;635;1115;1133;507;525;238	1	47	0	12.017	1.6	1.4	1.4	927430000	108010000	90478000	81438000	3	2	2	27
E9PE17;I3L0E3;Q9Y2R5	E9PE17;I3L0E3;Q9Y2R5	2;2;2	2;2;2	2;2;2	30547000	0	50711000	28S ribosomal protein S17, mitochondrial	MRPS17;hCG_1984214	;;	3	2	2	2	2	1	2	2	1	2	2	1	2	22.5	22.5	22.5	14.374	129	129;225;130	1	17	0	6.3481	22.5	7	22.5	359460000	33780000	22152000	43637000	1	1	3	13
E9PEM5;F5H1X8;P50851-2;P50851;H0YAC6;Q5T321;F5GXV7;Q8NFP9;H0Y9N9	E9PEM5;F5H1X8;P50851-2;P50851	20;20;20;19;8;2;2;2;1	20;20;20;19;8;2;2;2;1	20;20;20;19;8;2;2;2;1	178540000	186570000	136870000	Lipopolysaccharide-responsive and beige-like anchor protein	LRBA	;;;	9	20	20	20	13	12	12	13	12	12	13	12	12	9.4	9.4	9.4	286.97	2575	2575;2852;2851;2863;1505;2943;2946;2946;134	1	144	0	25.868	6.2	5.2	5.6	1932200000	254720000	150230000	134680000	3	4	1	34
E9PEP6;O14786;Q5JWQ4;E7EX60;Q5T7F0;Q5JWQ6;O14786-3;O14786-2;Q5JWQ2	E9PEP6;O14786;Q5JWQ4;E7EX60;Q5T7F0;Q5JWQ6;O14786-3;O14786-2	4;4;3;3;3;3;3;3;1	4;4;3;3;3;3;3;3;1	4;4;3;3;3;3;3;3;1	29739000	35419000	0	Neuropilin-1	NRP1	;;;;;;;	9	4	4	4	2	2	2	2	2	2	2	2	2	6.1	6.1	6.1	101.3	906	906;923;597;641;704;735;609;644;105	1	32	0	8.2315	3	3	3	439020000	27567000	27690000	31614000	1	1	0	5
E9PES6;E7ES08;E7EQU1;O15347	E9PES6;E7ES08;E7EQU1;O15347	5;5;5;5	5;5;5;5	5;5;5;5	161910000	172380000	176750000	High mobility group protein B3	HMGB3	;;;	4	5	5	5	4	5	5	4	5	5	4	5	5	26.8	26.8	26.8	17.522	153	153;188;193;200	1	49	0	8.3469	26.1	26.8	26.8	2073600000	175420000	183310000	178920000	1	2	3	20
E9PF18;Q16836;Q16836-3;Q16836-2	E9PF18;Q16836;Q16836-3;Q16836-2	12;12;12;12	12;12;12;12	12;12;12;12	913410000	901970000	830930000	Hydroxyacyl-coenzyme A dehydrogenase, mitochondrial	HADH	;;;	4	12	12	12	8	9	10	8	9	10	8	9	10	50.3	50.3	50.3	35.236	318	318;314;331;390	1	137	0	87.444	34	34.6	37.4	10663000000	918580000	883940000	934300000	6	8	5	76
E9PF19;Q9Y4P3;C9JVF0;F8WCR3;F8WDI9	E9PF19;Q9Y4P3;C9JVF0	12;12;6;2;2	12;12;6;2;2	12;12;6;2;2	207950000	227300000	204760000	Transducin beta-like protein 2	TBL2	;;	5	12	12	12	9	7	7	9	7	7	9	7	7	38	38	38	45.935	411	411;447;270;107;176	1	109	0	66.103	29.7	22.1	24.8	2528800000	177130000	147370000	203990000	5	3	3	58
E9PFQ4;Q86SQ0-2;Q86SQ0-3;Q86SQ0;G5E9V3;E9PGF6;E9PDY7	E9PFQ4;Q86SQ0-2;Q86SQ0-3;Q86SQ0;G5E9V3;E9PGF6	4;4;4;4;2;2;1	4;4;4;4;2;2;1	4;4;4;4;2;2;1	0	29765000	29357000	Pleckstrin homology-like domain family B member 2	PHLDB2	;;;;;	7	4	4	4	1	3	3	1	3	3	1	3	3	5.4	5.4	5.4	125.47	1115	1115;1210;1237;1253;581;744;519	1	32	0	7.3495	1	4.3	4.4	421000000	19050000	29964000	19708000	0	0	2	10
E9PFR3;Q14738-3;Q14738-2;Q14738;H0Y8C4;H7C5Q9;H0YJ35;Q15173-2;Q15173	E9PFR3;Q14738-3;Q14738-2;Q14738;H0Y8C4	11;11;11;11;9;4;1;1;1	11;11;11;11;9;4;1;1;1	6;6;6;6;5;2;0;0;0	210570000	176440000	180120000	Serine/threonine-protein phosphatase 2A 56 kDa regulatory subunit delta isoform	PPP2R5D	;;;;	9	11	11	6	10	8	11	10	8	11	6	4	6	25.9	25.9	13.8	69.116	594	594;496;570;602;504;154;71;494;497	1	116	0	27.286	22.7	16.7	25.9	2508100000	278770000	140850000	262580000	6	4	5	49
E9PFW2;O00462	E9PFW2;O00462	3;3	3;3	3;3	30850000	0	0	Beta-mannosidase	MANBA	;	2	3	3	3	2	1	2	2	1	2	2	1	2	4.5	4.5	4.5	94.411	822	822;879	1	12	0.00076065	2.828	3.3	1.2	3.3	204160000	32372000	25040000	42093000	1	0	0	4
E9PFW3;Q96CW1-2;Q96CW1;C9JJ47;C9JTK4;C9JGT8;C9JJD3;C9JPV8;H7C4C3	E9PFW3;Q96CW1-2;Q96CW1;C9JJ47	20;20;20;12;9;9;8;8;3	20;20;20;12;9;9;8;8;3	20;20;20;12;9;9;8;8;3	933930000	991920000	951410000	AP-2 complex subunit mu	AP2M1	;;;	9	20	20	20	17	18	20	17	18	20	17	18	20	50	50	50	52.303	460	460;433;435;252;160;195;113;136;122	1	286	0	139.95	42.4	42	50	12216000000	973580000	1002500000	1035700000	11	10	15	144
E9PG35;E9PHF7;Q96RQ3;F5GYT8;G5E9X5	E9PG35;E9PHF7;Q96RQ3;F5GYT8;G5E9X5	5;5;5;4;3	5;5;5;4;3	5;5;5;4;3	44869000	59864000	57561000	Methylcrotonoyl-CoA carboxylase subunit alpha, mitochondrial	MCCC1	;;;;	5	5	5	5	4	3	2	4	3	2	4	3	2	13.2	13.2	13.2	66.467	598	598;616;725;426;434	1	38	0	9.4439	11	8.9	4.8	622640000	57617000	65197000	44950000	0	1	1	11
E9PG39;E9PC15;Q53H12	E9PG39;E9PC15;Q53H12	4;4;4	4;4;4	4;4;4	94246000	65878000	91186000	Acylglycerol kinase, mitochondrial	AGK	;;	3	4	4	4	3	3	4	3	3	4	3	3	4	23.8	23.8	23.8	26.925	244	244;394;422	1	51	0	35.826	20.5	20.5	23.8	1153900000	89497000	48175000	91401000	2	1	2	18
E9PG40;P05067-7;P05067-11;P05067-8;P05067-9;P05067;H7C104;H7C0V9;E9PEV0;P05067-10;P05067-3;P05067-4;P05067-5;P05067-6;H7C2L2	E9PG40;P05067-7;P05067-11;P05067-8;P05067-9;P05067;H7C104;H7C0V9;E9PEV0;P05067-10;P05067-3;P05067-4;P05067-5;P05067-6	5;5;5;5;5;5;4;4;4;4;4;4;4;4;1	5;5;5;5;5;5;4;4;4;4;4;4;4;4;1	5;5;5;5;5;5;4;4;4;4;4;4;4;4;1	53729000	61909000	76695000	Amyloid beta A4 protein;N-APP;Soluble APP-alpha;Soluble APP-beta;C99;Beta-amyloid protein 42;Beta-amyloid protein 40;C83;P3(42);P3(40);C80;Gamma-secretase C-terminal fragment 59;Gamma-secretase C-terminal fragment 57;Gamma-secretase C-terminal fragment 50;C31	APP	;;;;;;;;;;;;;	15	5	5	5	4	4	3	4	4	3	4	4	3	8	8	8	80.832	714	714;733;746;751;752;770;280;485;660;639;677;695;696;714;181	1	53	0	7.3811	5.6	5.6	4.2	730340000	61558000	67510000	49515000	2	1	0	16
E9PGC0;P20936-2;B4DTL2;P20936;Q68CU6	E9PGC0;P20936-2;B4DTL2;P20936	4;4;4;4;1	4;4;4;4;1	4;4;4;4;1	18274000	18212000	20568000	Ras GTPase-activating protein 1	RASA1	;;;	5	4	4	4	3	3	2	3	3	2	3	3	2	5.3	5.3	5.3	101.79	881	881;870;880;1047;539	1	28	0	4.8972	3.9	3.7	2.3	183580000	21919000	21561000	18117000	1	0	1	9
E9PGE5;Q9NUY8-2;Q9NUY8	E9PGE5;Q9NUY8-2;Q9NUY8	2;2;2	2;2;2	2;2;2	0	28226000	0	TBC1 domain family member 23	TBC1D23	;;	3	2	2	2	1	2	0	1	2	0	1	2	0	5.5	5.5	5.5	63.286	562	562;684;699	1	11	0	17.93	2.5	5.5	0	121350000	11604000	25892000	0	0	3	0	8
E9PGT3;Q15418-3;E9PRI4;Q15418;Q15418-2;B7Z3B5;F2Z2J1;Q15349;Q15349-3;Q15349-2;E9PMM7;Q5SVM7;Q5SVM6;E9PAN7	E9PGT3;Q15418-3;E9PRI4;Q15418;Q15418-2	14;14;14;14;14;4;4;4;4;4;3;3;3;2	10;10;10;10;10;1;1;1;1;1;1;2;3;1	10;10;10;10;10;1;1;1;1;1;1;2;3;1	125420000	146630000	125500000	Ribosomal protein S6 kinase;Ribosomal protein S6 kinase alpha-1	RPS6KA1	;;;;	14	14	10	10	11	10	12	7	6	8	7	6	8	24.9	18.9	18.9	81.471	724	724;643;719;735;744;644;758;733;741;758;112;115;166;204	1	99	0	21.786	19.2	17.5	21.1	1692700000	125430000	123840000	151780000	3	4	4	37
E9PGT6;Q99627-2;Q99627;H7C3S9;B8ZZP3	E9PGT6;Q99627-2;Q99627;H7C3S9;B8ZZP3	5;5;5;4;4	5;5;5;4;4	5;5;5;4;4	222140000	221630000	231000000	COP9 signalosome complex subunit 8	COPS8	;;;;	5	5	5	5	5	4	4	5	4	4	5	4	4	42.2	42.2	42.2	19.344	173	173;160;209;83;206	1	60	0	80.939	42.2	36.4	36.4	2805200000	295940000	182350000	204070000	3	4	2	34
E9PH64;E7EWZ0;E9PF49;Q9Y6M9	E9PH64;E7EWZ0;E9PF49;Q9Y6M9	3;3;3;3	3;3;3;3	3;3;3;3	48077000	59828000	50469000	NADH dehydrogenase [ubiquinone] 1 beta subcomplex subunit 9	NDUFB9	;;;	4	3	3	3	3	2	3	3	2	3	3	2	3	19	19	19	20.383	168	168;178;221;179	1	29	0	5.2292	19	13.7	19	626720000	55605000	53186000	49927000	2	1	2	13
E9PHA2;Q15003;C9J470;Q15003-2;C9JZP1;H7C415	E9PHA2;Q15003;C9J470;Q15003-2	16;16;14;12;6;2	16;16;14;12;6;2	16;16;14;12;6;2	209640000	174230000	220790000	Condensin complex subunit 2	NCAPH	;;;	6	16	16	16	9	10	10	9	10	10	9	10	10	30.3	30.3	30.3	81.572	730	730;741;607;605;216;182	1	122	0	26.419	17.4	19.5	19.6	2293900000	191510000	149870000	235310000	4	5	6	47
E9PHH9;Q9BUI4	E9PHH9;Q9BUI4	1;1	1;1	1;1	0	29353000	0	DNA-directed RNA polymerase III subunit RPC3	POLR3C	;	2	1	1	1	1	1	1	1	1	1	1	1	1	4.1	4.1	4.1	46.189	411	411;534	1	25	0	13.245	4.1	4.1	4.1	260680000	17781000	27067000	14944000	1	2	1	23
E9PI68;Q15005;E9PL01;E9PRB9;H0YE04	E9PI68;Q15005;E9PL01;E9PRB9	10;10;9;5;3	10;10;9;5;3	10;10;9;5;3	995060000	875470000	1048600000	Signal peptidase complex subunit 2	SPCS2	;;;	5	10	10	10	10	10	10	10	10	10	10	10	10	43.6	43.6	43.6	28.503	257	257;226;157;87;166	1	163	0	151.27	43.6	43.6	43.6	11757000000	1027900000	911540000	1034200000	10	7	10	101
E9PIE3;Q969G5	E9PIE3;Q969G5	6;6	6;6	6;6	178240000	147550000	86352000	Protein kinase C delta-binding protein	PRKCDBP	;	2	6	6	6	4	4	6	4	4	6	4	4	6	21.5	21.5	21.5	31.088	293	293;261	1	77	0	31.726	15	14.7	21.5	1826400000	113720000	63798000	87695000	2	4	3	35
E9PJ55;Q9NUJ3;R4GNF5;E9PP52;E9PMB0;E7EN41	E9PJ55;Q9NUJ3	3;3;1;1;1;1	3;3;1;1;1;1	3;3;1;1;1;1	23044000	26543000	24699000	T-complex protein 11-like protein 1	TCP11L1	;	6	3	3	3	3	2	2	3	2	2	3	2	2	6.6	6.6	6.6	67.238	595	595;509;106;144;154;374	1	28	0	12.224	6.6	4.9	4.9	274110000	30027000	23559000	22731000	2	1	1	17
E9PJ81;Q04323;Q04323-2;E9PRQ7;E9PS08	E9PJ81;Q04323;Q04323-2;E9PRQ7	9;9;9;8;1	9;9;9;8;1	9;9;9;8;1	652570000	635200000	564890000	UBX domain-containing protein 1	UBXN1	;;;	5	9	9	9	8	7	8	8	7	8	8	7	8	40	40	40	32.611	290	290;297;312;293;100	1	122	0	316.62	37.2	31.7	37.2	7527300000	681980000	475780000	476150000	8	3	4	60
E9PJF0;E9PQW4;P27361-3;P27361;P27361-2;E9PBK7;B3KR49;H0YDH9;H0YEX6;E9PRH7;K7ELV1;K7EN18	E9PJF0;E9PQW4;P27361-3;P27361;P27361-2;E9PBK7;B3KR49	8;8;8;8;7;5;4;2;1;1;1;1	4;4;4;4;3;2;1;0;1;1;0;0	4;4;4;4;3;2;1;0;1;1;0;0	60716000	87458000	87340000	Mitogen-activated protein kinase;Mitogen-activated protein kinase 3	MAPK3	;;;;;;	12	8	4	4	8	7	7	4	3	3	4	3	3	34.5	19.9	19.9	35.737	316	316;339;357;379;335;311;265;87;121;136;233;281	1	49	0	17.534	34.5	29.1	29.1	958940000	85516000	90557000	81026000	1	1	2	14
E9PJK1;E9PRJ8;H0YDL9;H0YDJ9;E9PIF1;A6NMH8;P60033;E9PM31;H0YEE2	E9PJK1;E9PRJ8;H0YDL9;H0YDJ9;E9PIF1;A6NMH8;P60033;E9PM31;H0YEE2	2;2;2;2;2;2;2;1;1	2;2;2;2;2;2;2;1;1	2;2;2;2;2;2;2;1;1	99595000	114440000	55371000	Tetraspanin;CD81 antigen	CD81	;;;;;;;;	9	2	2	2	1	2	2	1	2	2	1	2	2	26.1	26.1	26.1	17.963	165	165;209;221;225;242;274;236;92;148	1	33	0	104.03	12.1	26.1	26.1	1285500000	56075000	110610000	60085000	3	1	0	18
E9PK54	E9PK54	14	1	1	145400000	163750000	160930000		HSPA8		1	14	1	1	14	13	13	1	1	1	1	1	1	82	6.6	6.6	19.955	183	183	1	24	0.0042715	2.0935	82	80.9	80.9	1975400000	141880000	147490000	148150000	2	1	1	9
E9PK67;E9PNI7;Q53GL7;E9PPE7;F8W8G7;E9PJI2;E9PPV8;E9PM86;E9PSE7;E9PIA6;E9PIK9	E9PK67;E9PNI7;Q53GL7;E9PPE7	12;12;12;8;3;2;2;1;1;1;1	12;12;12;8;3;2;2;1;1;1;1	12;12;12;8;3;2;2;1;1;1;1	130050000	158270000	183840000	Poly [ADP-ribose] polymerase 10	PARP10	;;;	11	12	12	12	7	10	10	7	10	10	7	10	10	19.1	19.1	19.1	109.1	1016	1016;1037;1025;764;339;172;178;128;135;144;146	1	115	0	27.045	10.2	16.5	16.1	1926800000	114600000	151560000	170570000	4	4	2	32
E9PK91;Q9NYF8-3;Q9NYF8-2;Q9NYF8;E9PK09;E9PQN2;E9PKI6;Q9NYF8-4;E9PJA7;H0YF00;H0YF63;B0AZU3;H0YF14	E9PK91;Q9NYF8-3;Q9NYF8-2;Q9NYF8;E9PK09;E9PQN2;E9PKI6;Q9NYF8-4	13;13;13;13;12;12;12;8;6;2;1;1;1	13;13;13;13;12;12;12;8;6;2;1;1;1	13;13;13;13;12;12;12;8;6;2;1;1;1	424610000	378280000	377510000	Bcl-2-associated transcription factor 1	BCLAF1	;;;;;;;	13	13	13	13	9	10	8	9	10	8	9	10	8	17.7	17.7	17.7	100.4	871	871;869;918;920;725;750;752;747;467;118;126;138;187	1	149	0	23.339	13.2	14.6	12.1	4817900000	483340000	332590000	288390000	9	9	7	77
E9PK95;P28702;P28702-3	E9PK95;P28702;P28702-3	5;5;5	5;5;5	1;1;1	63247000	51233000	0	Retinoic acid receptor RXR-beta	RXRB	;;	3	5	5	1	4	3	3	4	3	3	0	1	0	18.2	18.2	4.9	38.516	347	347;533;537	1	41	0	9.2815	13.3	11.5	10.7	509370000	43377000	50464000	22286000	1	1	1	10
E9PKG1;H7C2I1;Q99873-3;Q99873-2;Q99873-4;Q99873;E9PIX6;E9PQ98;H0YDE4;E9PNR9;E9PMW9;E9PI83;Q9NR22-2;Q9NR22;E9PMZ2	E9PKG1;H7C2I1;Q99873-3;Q99873-2;Q99873-4;Q99873;E9PIX6;E9PQ98;H0YDE4;E9PNR9	20;20;20;20;20;20;14;13;11;10;5;5;3;3;2	20;20;20;20;20;20;14;13;11;10;5;5;3;3;2	20;20;20;20;20;20;14;13;11;10;5;5;3;3;2	1264000000	1291600000	1474600000	Protein arginine N-methyltransferase 1	PRMT1	;;;;;;;;;	15	20	20	20	18	18	19	18	18	19	18	18	19	68	68	68	37.709	325	325;371;343;347;353;361;209;205;238;160;110;113;385;394;63	1	314	0	97.697	58.5	59.4	63.4	16341000000	1230700000	1257200000	1568800000	19	17	20	220
E9PKH6;E9PPW7;O00217;E9PN51;F8W9K7;H0YDT4	E9PKH6;E9PPW7;O00217;E9PN51;F8W9K7	5;5;5;4;4;1	5;5;5;4;4;1	5;5;5;4;4;1	44750000	57381000	54969000	NADH dehydrogenase [ubiquinone] iron-sulfur protein 8, mitochondrial	NDUFS8	;;;;	6	5	5	5	3	2	4	3	2	4	3	2	4	41.3	41.3	41.3	15.892	138	138;184;210;110;124;93	1	39	0	13.213	25.4	12.3	28.3	658450000	47514000	38488000	67220000	1	1	2	20
E9PKP7;P17480-2;P17480;E9PMM2;H0YDH7	E9PKP7;P17480-2;P17480;E9PMM2	6;6;6;3;1	6;6;6;3;1	6;6;6;3;1	109430000	99090000	127410000	Nucleolar transcription factor 1	UBTF	;;;	5	6	6	6	4	5	5	4	5	5	4	5	5	8.6	8.6	8.6	87.435	745	745;727;764;149;36	1	67	0	14.176	5.9	7.7	7.7	1300300000	83139000	83118000	111790000	2	1	2	21
E9PKS9;E9PQE8;E9PN70;B4DME1;Q9Y296;G3V1A0;G5EA23;J3KP27	E9PKS9;E9PQE8;E9PN70;B4DME1;Q9Y296	3;3;3;3;3;1;1;1	3;3;3;3;3;1;1;1	3;3;3;3;3;1;1;1	24188000	0	27717000	Trafficking protein particle complex subunit 4	TRAPPC4	;;;;	8	3	3	3	2	1	2	2	1	2	2	1	2	28.6	28.6	28.6	14.15	126	126;176;257;165;219;117;126;181	1	29	0.00025927	3.145	17.5	8.7	17.5	369650000	19465000	27268000	31477000	0	0	0	4
E9PL10;Q96K17;Q96K17-2	E9PL10;Q96K17;Q96K17-2	6;6;4	6;6;4	6;6;4	265890000	258380000	253890000	Transcription factor BTF3;Transcription factor BTF3 homolog 4	BTF3L4	;;	3	6	6	6	5	6	6	5	6	6	5	6	6	37.9	37.9	37.9	15.779	145	145;158;100	1	81	0	41.646	37.9	37.9	37.9	3599800000	320630000	279730000	304360000	3	3	4	28
E9PLK3;P55786;B7Z463;E5RJ24;E7EWZ2;I3L083;A6NEC2;F5GZY4;H0YAQ6;H0YDG0;E9PP11;A6NEC2-2;E9PJ74;H0YCQ5;E9PJY4;E9PPD4;E9PRQ5;A6NEC2-3;E9PJF9;E9PPZ2;E9PI82	E9PLK3;P55786;B7Z463	45;45;41;15;15;15;15;12;11;8;8;8;5;4;4;4;4;3;2;2;1	45;45;41;15;15;15;15;12;11;8;8;8;5;4;4;4;4;3;2;2;1	45;45;41;15;15;15;15;12;11;8;8;8;5;4;4;4;4;3;2;2;1	3362700000	3093100000	3479800000	Puromycin-sensitive aminopeptidase	NPEPPS	;;	21	45	45	45	39	40	39	39	40	39	39	40	39	62.4	62.4	62.4	102.99	915	915;919;839;471;477;478;478;324;431;169;201;263;158;65;141;163;172;163;134;178;127	1	642	0	323.31	52.7	52.7	50.9	41151000000	3329200000	3052800000	3327300000	31	23	33	363
E9PM04;Q9BTE7;H0YCN4;H0Y9C5;E9PLH8;E9PM78;H0YD80;E9PLS2;E9PQV9;H0Y907;B4DH26;Q92564-2;Q92564;Q92564-3	E9PM04;Q9BTE7;H0YCN4	5;5;3;1;1;1;1;1;1;1;1;1;1;1	5;5;3;1;1;1;1;1;1;1;1;1;1;1	5;5;3;1;1;1;1;1;1;1;1;1;1;1	248850000	0	0	DCN1-like protein;DCN1-like protein 5	DCUN1D5	;;	14	5	5	5	4	2	3	4	2	3	4	2	3	34.2	34.2	34.2	17.855	152	152;237;195;21;30;67;68;71;84;116;232;257;292;336	1	42	0	9.3844	27.6	10.5	18.4	2131700000	289380000	22481000	49061000	3	0	0	17
E9PM46;Q96K76-2;Q96K76;Q96K76-3	E9PM46;Q96K76-2;Q96K76	20;19;19;1	20;19;19;1	20;19;19;1	240500000	257600000	275290000	Ubiquitin carboxyl-terminal hydrolase 47	USP47	;;	4	20	20	20	12	10	12	12	10	12	12	10	12	19.3	19.3	19.3	154.7	1355	1355;1287;1375;157	1	155	0	45.386	11.7	9.7	11.3	3026200000	251080000	225510000	266870000	4	3	6	49
E9PM92;O00193;E9PRZ9;E3W975;E9PQA1	E9PM92;O00193;E9PRZ9;E3W975	4;4;3;3;1	4;4;3;3;1	4;4;3;3;1	236500000	284970000	272690000	Small acidic protein	C11orf58;SMAP	;;;	5	4	4	4	4	4	4	4	4	4	4	4	4	30.1	30.1	30.1	17.506	156	156;183;90;139;86	1	73	0	12.819	30.1	30.1	30.1	3666600000	154360000	295250000	364030000	1	2	5	41
E9PMM3;Q9Y5Y5;Q9Y5Y5-2;E9PMS3;E9PQW0;E9PLS4;E9PP98	E9PMM3;Q9Y5Y5;Q9Y5Y5-2;E9PMS3;E9PQW0;E9PLS4;E9PP98	2;2;2;1;1;1;1	2;2;2;1;1;1;1	2;2;2;1;1;1;1	44528000	0	35934000	Peroxisomal membrane protein PEX16	PEX16	;;;;;;	7	2	2	2	2	1	2	2	1	2	2	1	2	13.1	13.1	13.1	21.165	183	183;336;346;52;60;160;241	1	25	0.00025694	2.9914	13.1	6	13.1	352390000	51260000	12725000	27807000	2	1	1	10
E9PMQ6;Q00613-2;Q00613;E9PI02	E9PMQ6;Q00613-2;Q00613;E9PI02	2;2;2;1	2;2;2;1	2;2;2;1	37455000	0	0	Heat shock factor protein 1	HSF1	;;;	4	2	2	2	2	1	2	2	1	2	2	1	2	6.5	6.5	6.5	46.536	430	430;489;529;138	1	19	0	4.0819	6.5	2.8	6.5	273720000	35821000	9582700	27074000	1	0	0	8
E9PMR4;P48509;E9PRJ3	E9PMR4;P48509;E9PRJ3	4;4;3	4;4;3	4;4;3	429160000	515200000	561910000	Tetraspanin;CD151 antigen	CD151	;;	3	4	4	4	3	4	4	3	4	4	3	4	4	13.9	13.9	13.9	28.067	251	251;253;178	1	42	0	7.6754	10.4	13.9	13.9	5354400000	370600000	516570000	636940000	0	3	4	15
E9PMS6;Q8WWI1-3;F8WD26;J3KP06;Q8WWI1-4;Q8WWI1-2;Q8WWI1;E9PMT2;E9PLH4;E9PMP7;H0Y424;E9PLU6;E9PK58;E9PJ10;H0YDQ3;H0YDG6;H0YE95	E9PMS6;Q8WWI1-3;F8WD26;J3KP06;Q8WWI1-4;Q8WWI1-2;Q8WWI1;E9PMT2;E9PLH4;E9PMP7;H0Y424	15;15;14;14;14;14;14;13;13;10;8;2;2;2;2;2;1	15;15;14;14;14;14;14;13;13;10;8;2;2;2;2;2;1	15;15;14;14;14;14;14;13;13;10;8;2;2;2;2;2;1	229390000	223920000	223650000	LIM domain only protein 7	LMO7	;;;;;;;;;;	17	15	15	15	11	11	8	11	11	8	11	11	8	14	14	14	145.42	1275	1275;1349;1614;1670;1614;1670;1683;1398;1385;1045;1055;121;165;191;292;305;179	1	125	0	23.601	10	10.4	7.3	2625500000	201430000	174420000	184060000	5	6	4	52
E9PN41;A8MVV6;J3KQ42;O14817;E9PSH3;E9PPX8;J3KNL1	E9PN41;A8MVV6;J3KQ42;O14817;E9PSH3;E9PPX8	3;3;3;3;2;2;1	3;3;3;3;2;2;1	3;3;3;3;2;2;1	109730000	144780000	50232000	Tetraspanin;Tetraspanin-4	TSPAN4	;;;;;	7	3	3	3	3	3	3	3	3	3	3	3	3	30.3	30.3	30.3	15.195	132	132;174;257;238;100;159;204	1	32	0	33.086	30.3	30.3	30.3	1258600000	284500000	121020000	25658000	2	4	2	20
E9PNA6;Q13488;E9PM12;E9PMC5;H0YCE3;Q13488-2	E9PNA6;Q13488;E9PM12;E9PMC5;H0YCE3	4;4;3;2;2;1	4;4;3;2;2;1	4;4;3;2;2;1	0	0	34614000	V-type proton ATPase subunit a;V-type proton ATPase 116 kDa subunit a isoform 3	TCIRG1	;;;;	6	4	4	4	1	3	3	1	3	3	1	3	3	21.4	21.4	21.4	33.777	299	299;830;217;174;290;614	1	22	0	5.0009	5	13.7	18.7	256610000	18420000	39575000	43123000	0	0	2	7
E9PNK6;E9PPQ1;J3KNE7;Q16890-5;Q16890;Q16890-4;Q16890-3;Q16890-2;E9PNQ9	E9PNK6;E9PPQ1;J3KNE7;Q16890-5;Q16890;Q16890-4;Q16890-3;Q16890-2;E9PNQ9	7;7;7;7;7;6;6;6;5	7;7;7;7;7;6;6;6;5	7;7;7;7;7;6;6;6;5	518610000	475350000	534030000	Tumor protein D53	TPD52L1	;;;;;;;;	9	7	7	7	7	7	7	7	7	7	7	7	7	42.8	42.8	42.8	18.661	166	166;191;209;175;204;102;131;144;92	1	122	0	36.66	42.8	42.8	42.8	6139900000	401060000	414280000	558160000	7	6	5	69
E9PNP3;Q9H7C9;E9PJP1;E9PLK9;K4DI89;E9PR47;Q9H7C9-3;Q9H7C9-2	E9PNP3;Q9H7C9;E9PJP1;E9PLK9;K4DI89;E9PR47;Q9H7C9-3;Q9H7C9-2	2;2;1;1;1;1;1;1	2;2;1;1;1;1;1;1	2;2;1;1;1;1;1;1	50674000	68938000	58652000	Mth938 domain-containing protein	AAMDC	;;;;;;;	8	2	2	2	2	2	2	2	2	2	2	2	2	18.4	18.4	18.4	15.588	141	141;122;93;137;147;168;88;118	1	30	0	5.2495	18.4	18.4	18.4	543390000	52147000	62990000	59224000	1	3	3	15
E9PNW4;E9PR17;P13987;H0YET2	E9PNW4;E9PR17;P13987;H0YET2	4;4;4;2	4;4;4;2	4;4;4;2	1101900000	1216400000	1627500000	CD59 glycoprotein	CD59	;;;	4	4	4	4	4	4	4	4	4	4	4	4	4	29.6	29.6	29.6	11.985	108	108;130;128;52	1	71	0	14.317	29.6	29.6	29.6	14910000000	1200200000	1022500000	1434900000	4	3	3	49
E9PNW8;Q8WVX9	E9PNW8;Q8WVX9	2;2	2;2	2;2	0	20882000	25365000	Fatty acyl-CoA reductase 1	FAR1	;	2	2	2	2	1	2	2	1	2	2	1	2	2	7.8	7.8	7.8	37.481	335	335;515	1	17	0	4.6164	3.9	7.8	7.8	195290000	6812900	19398000	25925000	0	1	1	3
E9PQ57;P78406;E9PPG9;B0QZ36;B0QZ37	E9PQ57;P78406;E9PPG9;B0QZ36	7;7;6;4;2	7;7;6;4;2	7;7;6;4;2	142490000	133820000	147160000	mRNA export factor	RAE1	;;;	5	7	7	7	3	5	6	3	5	6	3	5	6	27.9	27.9	27.9	47.831	437	437;368;217;137;87	1	65	0	30.523	12.1	18.3	24.9	1738000000	87407000	117960000	159940000	1	1	3	18
E9PQD0;E9PS30;E9PLI6;E9PS76;Q8N9N8	E9PQD0;E9PS30;E9PLI6;E9PS76;Q8N9N8	2;2;2;2;2	2;2;2;2;2	2;2;2;2;2	78981000	60643000	62684000	Probable RNA-binding protein EIF1AD	EIF1AD	;;;;	5	2	2	2	2	2	2	2	2	2	2	2	2	51.6	51.6	51.6	7.3314	64	64;78;113;114;165	1	29	0	22.149	51.6	51.6	51.6	826970000	95481000	65606000	62779000	2	2	1	14
E9PQM0;Q8WUK0-2;Q8WUK0-3;Q8WUK0	E9PQM0;Q8WUK0-2;Q8WUK0-3;Q8WUK0	2;2;2;2	2;2;2;2	2;2;2;2	18212000	22045000	0	Phosphatidylglycerophosphatase and protein-tyrosine phosphatase 1	PTPMT1	;;;	4	2	2	2	2	2	1	2	2	1	2	2	1	14.9	14.9	14.9	18.215	168	168;137;151;201	1	25	0	10.424	14.9	14.9	7.1	231590000	16653000	22324000	8557400	0	0	1	8
E9PQY2;Q9NQP4	E9PQY2;Q9NQP4	2;2	2;2	2;2	103040000	98846000	85983000	Prefoldin subunit 4	PFDN4	;	2	2	2	2	2	2	2	2	2	2	2	2	2	16.9	16.9	16.9	15.598	136	136;134	1	35	0	26.442	16.9	16.9	16.9	1070000000	105110000	112590000	110390000	3	1	1	12
E9PQY3;P11117;E9PHY0;B7Z7D2;F5GWV7;E9PP23;G5EA28;E9PKW9;E9PQW9;B7Z6U3;P11117-2	E9PQY3;P11117;E9PHY0;B7Z7D2;F5GWV7;E9PP23	11;11;10;8;7;6;3;3;3;3;3	11;11;10;8;7;6;3;3;3;3;3	11;11;10;8;7;6;3;3;3;3;3	619620000	564740000	585730000	Lysosomal acid phosphatase	ACP2	;;;;;	11	11	11	11	10	10	10	10	10	10	10	10	10	29.9	29.9	29.9	45.306	395	395;423;360;391;236;305;122;151;160;162;160	1	143	0	49.205	26.6	26.6	26.6	7343400000	625610000	532040000	531300000	6	5	6	85
E9PRM7;Q96BI1	E9PRM7;Q96BI1	2;2	2;2	2;2	47096000	51505000	0	Solute carrier family 22 member 18	SLC22A18	;	2	2	2	2	2	2	2	2	2	2	2	2	2	7.4	7.4	7.4	34.952	326	326;424	1	24	0	5.6217	7.4	7.4	7.4	624550000	39951000	45151000	41336000	1	1	0	8
E9PS17;E9PK59;Q96KG9-5;Q96KG9-3;Q96KG9-4;Q96KG9-6;Q96KG9-2;Q96KG9;E9PPN3;H0YCI6	E9PS17;E9PK59;Q96KG9-5;Q96KG9-3;Q96KG9-4;Q96KG9-6;Q96KG9-2;Q96KG9;E9PPN3	10;10;10;10;10;10;10;10;7;3	10;10;10;10;10;10;10;10;7;3	10;10;10;10;10;10;10;10;7;3	320180000	370760000	386190000	N-terminal kinase-like protein	SCYL1	;;;;;;;;	10	10	10	10	8	7	9	8	7	9	8	7	9	16.1	16.1	16.1	85.718	775	775;780;626;707;781;787;791;808;665;175	1	96	0	26.464	13.3	9.5	13.3	4326800000	412810000	354330000	395190000	3	5	4	42
E9PS74;Q8NBI5;E7EQD2;H0YD64	E9PS74;Q8NBI5;E7EQD2;H0YD64	3;3;3;2	3;3;3;2	3;3;3;2	58131000	52954000	58080000	Solute carrier family 43 member 3	SLC43A3	;;;	4	3	3	3	3	3	3	3	3	3	3	3	3	8.2	8.2	8.2	36.797	331	331;491;504;137	1	34	0	3.8744	8.2	8.2	8.2	714750000	71051000	56029000	69938000	2	2	2	15
E9PSH2;B1AP13;P08174-4;P08174;P08174-3;P08174-5;P08174-2;P08174-6;P08174-7;H3BLV0;B1AP15;H7BY55	E9PSH2;B1AP13;P08174-4;P08174;P08174-3;P08174-5;P08174-2;P08174-6;P08174-7;H3BLV0;B1AP15	19;19;19;19;19;19;19;19;19;18;10;6	19;19;19;19;19;19;19;19;19;18;10;6	19;19;19;19;19;19;19;19;19;18;10;6	6191100000	5098400000	5811700000	Complement decay-accelerating factor	CD55	;;;;;;;;;;	12	19	19	19	17	16	17	17	16	17	17	16	17	55.4	55.4	55.4	41.227	377	377;444;364;381;384;439;440;525;551;326;317;129	1	326	0	323.31	52.5	44.3	51.2	70654000000	6136900000	4217500000	4675200000	33	28	30	341
E9PSI1;E9PL78;E9PJM1;E9PMQ9;O15321-2;O15321;E9PQY7;E9PS99;G3V1B9;E9PNW2;E9PQI5;E9PJC4;E9PQ80;H0YI89	E9PSI1;E9PL78;E9PJM1;E9PMQ9;O15321-2;O15321;E9PQY7;E9PS99;G3V1B9	14;9;9;9;9;9;8;8;7;6;5;5;5;2	14;9;9;9;9;9;8;8;7;6;5;5;5;2	9;9;9;9;9;9;8;8;7;6;0;5;0;0	333410000	393180000	370290000	Transmembrane 9 superfamily member 1	TM9SF1	;;;;;;;;	14	14	14	9	13	12	11	13	12	11	8	8	7	20.2	20.2	12.5	92.386	815	815;300;420;589;489;606;242;257;519;207;166;210;213;61	1	170	0	119.02	20.1	17.2	17.1	4523900000	398190000	377020000	311020000	7	8	9	94
F2Z2V0;B0QZ18;Q99829;E7ENH5;A6PVH9;Q5JX58;Q5JX59;Q5JX60;Q5JX44;Q5JX45;Q5JX56;Q5JX61;Q5JX52;Q5JX55;Q5JX54;Q5JX57;E7EV27;H0Y524	F2Z2V0;B0QZ18;Q99829;E7ENH5;A6PVH9;Q5JX58;Q5JX59;Q5JX60;Q5JX44;Q5JX45;Q5JX56;Q5JX61;Q5JX52	7;7;7;6;6;5;5;5;5;5;4;4;4;3;2;2;2;2	7;7;7;6;6;5;5;5;5;5;4;4;4;3;2;2;2;2	7;7;7;6;6;5;5;5;5;5;4;4;4;3;2;2;2;2	458500000	377900000	379940000	Copine-1	CPNE1	;;;;;;;;;;;;	18	7	7	7	7	6	6	7	6	6	7	6	6	12.6	12.6	12.6	58.634	533	533;542;537;427;481;201;209;231;304;386;174;213;305;152;136;137;138;208	1	104	0	15.368	12.6	11.3	11.3	5411100000	434100000	373480000	365890000	5	3	3	52
F5GWH5;P61165	F5GWH5;P61165	1;1	1;1	1;1	0	88353000	84408000	Transmembrane protein 258	TMEM258	;	2	1	1	1	1	1	1	1	1	1	1	1	1	16.3	16.3	16.3	5.7065	49	49;79	1	30	0.00938	1.7356	16.3	16.3	16.3	1202600000	73589000	91839000	99283000	1	2	1	17
F5GWJ1;O60245;O60245-2;H0YAH0	F5GWJ1;O60245;O60245-2;H0YAH0	13;13;13;7	13;13;13;7	13;13;13;7	317660000	309160000	291720000	Protocadherin-7	PCDH7	;;;	4	13	13	13	8	9	9	8	9	9	8	9	9	15	15	15	136.57	1255	1255;1069;1072;937	1	111	0	62.052	8.5	8.9	9.6	3734800000	308640000	284260000	259440000	3	4	5	55
F5GWP8;C9JK18;C9JKY1;C9JTX4;C9J826;C9JPI2;K7ERP3	F5GWP8	40;13;13;12;12;3;3	40;13;13;12;12;3;3	0;0;0;0;0;0;0	7664100000	9056500000	8133600000		KRT17		7	40	40	0	37	37	37	37	37	37	0	0	0	73.3	73.3	0	66.35	591	591;295;297;235;276;86;104	1	813	0	323.31	70.4	68.2	68.2	105410000000	6909800000	9106600000	8138700000	41	39	38	511
F5GWS3;Q6P9B6;H3BM75;H3BUB0	F5GWS3;Q6P9B6	5;5;2;1	5;5;2;1	5;5;2;1	54031000	65475000	52098000	TLD domain-containing protein 1	TLDC1	;	4	5	5	5	3	2	3	3	2	3	3	2	3	18.2	18.2	18.2	48.035	429	429;456;193;148	1	44	0	10.515	10.5	7.5	10.5	705440000	47603000	58450000	59298000	0	0	3	10
F5GWT4;F5H2M7;Q9H4A3-2;Q9H4A3;Q9H4A3-5;Q9H4A3-6;Q9H4A3-7;Q9H4A3-4;F6UYG0;K7ENT7;Q96J92-2;Q96J92-3;Q96J92	F5GWT4;F5H2M7;Q9H4A3-2;Q9H4A3;Q9H4A3-5;Q9H4A3-6;Q9H4A3-7	17;17;17;17;17;17;17;8;7;1;1;1;1	17;17;17;17;17;17;17;8;7;1;1;1;1	15;15;15;15;15;15;15;8;5;1;1;1;1	288500000	284750000	272660000	Serine/threonine-protein kinase WNK1	WNK1	;;;;;;	13	17	17	15	13	10	10	13	10	10	12	10	10	9.7	9.7	8.7	225.5	2134	2134;2880;2135;2382;2634;2642;2833;1975;393;469;663;1165;1243	1	147	0	39.496	7.9	6	6	3180900000	331550000	248690000	262920000	9	6	4	69
F5GWX5;Q14839;Q14839-2;Q8TDI0;Q12873-2;Q12873;Q12873-3;K7EMY3;Q5TG85;F5H6N4;F2Z2R5;K7EPV1;K7ESA5;I3L229;H7C3H7;H7C0J3	F5GWX5;Q14839;Q14839-2	44;44;44;9;9;9;9;7;6;3;3;1;1;1;1;1	44;44;44;9;9;9;9;7;6;3;3;1;1;1;1;1	44;44;44;9;9;9;9;7;6;3;3;1;1;1;1;1	638730000	744410000	711810000	Chromodomain-helicase-DNA-binding protein 4	CHD4	;;	16	44	44	44	31	27	28	31	27	28	31	27	28	32.4	32.4	32.4	217.1	1905	1905;1912;1940;1954;1966;2000;2059;1060;808;354;1225;63;127;249;277;383	1	392	0	173.05	20.3	18	18	8878200000	734330000	621810000	643560000	11	12	10	151
F5GWY5;O00592-2;O00592;F5H7A2	F5GWY5;O00592-2;O00592;F5H7A2	8;8;8;7	8;8;8;7	8;8;8;7	1395000000	1267300000	1227200000	Podocalyxin	PODXL	;;;	4	8	8	8	8	8	6	8	8	6	8	8	6	18.4	18.4	18.4	58.865	560	560;526;558;526	1	94	0	82.627	18.4	18.4	14.5	14495000000	1401000000	1110800000	1146900000	6	5	6	60
F5GXF0;P22736;P22736-2	F5GXF0;P22736;P22736-2	3;3;3	3;3;3	3;3;3	23683000	18595000	16226000	Nuclear receptor subfamily 4 group A member 1	NR4A1	;;	3	3	3	3	2	3	2	2	3	2	2	3	2	5.4	5.4	5.4	70.451	652	652;598;611	1	26	0	4.9455	3.7	5.4	3.4	234170000	21435000	19991000	10177000	0	0	0	11
F5GXX5;P61803;F5H895	F5GXX5;P61803;F5H895	4;4;2	4;4;2	4;4;2	749260000	796360000	785220000	Dolichyl-diphosphooligosaccharide--protein glycosyltransferase subunit DAD1	DAD1	;;	3	4	4	4	4	4	4	4	4	4	4	4	4	47.1	47.1	47.1	9.5541	85	85;113;65	1	62	0	20.115	47.1	47.1	47.1	9037200000	743250000	766660000	836430000	3	2	2	33
F5GYC1;E7EUE1;P28288;P28288-2;P28288-3	F5GYC1;E7EUE1;P28288;P28288-2	13;13;13;8;2	13;13;13;8;2	13;13;13;8;2	209080000	237170000	205160000	ATP-binding cassette sub-family D member 3	ABCD3	;;;	5	13	13	13	9	10	10	9	10	10	9	10	10	24.2	24.2	24.2	67.315	586	586;683;659;549;236	1	130	0	55.948	17.9	17.4	18.3	2507000000	185860000	250460000	237630000	7	5	7	68
F5GYC4;B4DG22;B7ZB17;P51812;B1AXG1;B1AXG2;Q9UK32;B7ZL90;D6R910;D6RHW7;D6RA62;Q5TI62;D6RE03	F5GYC4;B4DG22;B7ZB17;P51812	16;16;16;16;5;3;3;3;2;1;1;1;1	16;16;16;16;5;3;3;3;2;1;1;1;1	12;12;12;12;2;2;1;1;0;0;0;0;0	311260000	329550000	326220000	Ribosomal protein S6 kinase alpha-3	RPS6KA3	;;;	13	16	16	12	15	10	11	15	10	11	11	6	7	27.9	27.9	21.8	80.622	710	710;711;712;740;227;133;745;745;125;96;141;166;171	1	171	0	22.048	25.5	15.6	17.3	3875000000	375300000	253510000	312890000	10	3	6	62
F5GYJ5;Q9NX18;F8W679;M0QYN2;F5GXW4;M0R060;F5H5T6;F5H8E2	F5GYJ5;Q9NX18;F8W679;M0QYN2;F5GXW4;M0R060;F5H5T6	4;4;2;2;2;2;2;1	4;4;2;2;2;2;2;1	4;4;2;2;2;2;2;1	25989000	99489000	103490000	Succinate dehydrogenase assembly factor 2, mitochondrial	SDHAF2	;;;;;;	8	4	4	4	2	3	4	2	3	4	2	3	4	31.2	31.2	31.2	18.388	154	154;166;129;133;133;141;163;88	1	32	0	11.333	13	25.3	31.2	885010000	30457000	77803000	122820000	1	1	2	12
F5GYK2;Q9NRL3;F8VYA6;M0R317;M0QZM0	F5GYK2;Q9NRL3;F8VYA6;M0R317	6;6;6;5;2	6;6;6;5;2	5;5;5;4;2	102540000	98888000	91504000	Striatin-4	STRN4	;;;	5	6	6	5	4	4	3	4	4	3	3	3	2	18.8	18.8	17.2	68.584	634	634;753;760;198;317	1	57	0	8.8047	7.9	7.9	5.8	1124800000	96162000	139150000	92139000	3	3	3	29
F5GYQ1;P61421;J3QL14;R4GN72;H3BQB4;H3BSG7;H3BQJ1	F5GYQ1;P61421;J3QL14;R4GN72	7;7;5;5;2;2;1	7;7;5;5;2;2;1	7;7;5;5;2;2;1	135850000	215830000	193660000	V-type proton ATPase subunit d 1	ATP6V0D1	;;;	7	7	7	7	5	6	7	5	6	7	5	6	7	29.6	29.6	29.6	44.659	392	392;351;232;274;113;115;227	1	79	0	48.276	20.9	27.8	29.6	2208100000	82889000	217320000	226630000	2	4	4	43
F5GYV5;H7BZV4;F8WCT1;Q66PJ3-7;Q66PJ3-4;Q66PJ3-3;Q66PJ3-2;Q66PJ3;F8WEP2;F5H7X4;Q66PJ3-5	F5GYV5;H7BZV4;F8WCT1;Q66PJ3-7;Q66PJ3-4;Q66PJ3-3;Q66PJ3-2;Q66PJ3;F8WEP2;F5H7X4;Q66PJ3-5	2;2;2;2;2;2;2;2;1;1;1	2;2;2;2;2;2;2;2;1;1;1	2;2;2;2;2;2;2;2;1;1;1	0	33209000	0	ADP-ribosylation factor-like protein 6-interacting protein 4	ARL6IP4	;;;;;;;;;;	11	2	2	2	1	2	1	1	2	1	1	2	1	13.3	13.3	13.3	23.687	211	211;216;229;226;399;402;413;421;170;307;365	1	15	0	4.5741	7.6	13.3	7.6	190580000	12175000	30019000	11967000	0	1	1	7
F5GZP8;Q5JVZ5;B4DRL5;Q7Z5G9;Q96JJ3;B4DZ20;Q5JW01;H0YCM7;Q5JVZ8;Q5JVZ4	F5GZP8;Q5JVZ5;B4DRL5;Q7Z5G9;Q96JJ3;B4DZ20;Q5JW01;H0YCM7	5;5;5;5;5;4;3;3;2;1	5;5;5;5;5;4;3;3;2;1	5;5;5;5;5;4;3;3;2;1	37919000	36500000	38495000	Engulfment and cell motility protein 2	ELMO2	;;;;;;;	10	5	5	5	4	3	3	4	3	3	4	3	3	14.5	14.5	14.5	62.135	537	537;718;732;632;720;452;283;441;267;338	1	33	0	20.23	11	7.6	7.6	455850000	48889000	31757000	36860000	1	1	1	13
F5GZS6;P08195;J3KPF3;P08195-3;P08195-4;H0YFS2;F5GZI0;H0YFX4	F5GZS6;P08195;J3KPF3;P08195-3;P08195-4	33;33;32;32;32;11;8;4	33;33;32;32;32;11;8;4	2;2;1;1;1;0;0;0	12717000000	13677000000	13756000000	4F2 cell-surface antigen heavy chain	SLC3A2	;;;;	8	33	33	2	31	28	30	31	28	30	2	2	2	56.9	56.9	5.7	64.872	599	599;630;631;568;661;247;175;122	1	717	0	323.31	55.4	54.4	53.3	162720000000	13336000000	13439000000	13451000000	46	42	51	545
F5GZU5;G3V1P5;Q96RN5-3;Q96RN5-2;Q96RN5;B4DM43;H7C308	F5GZU5;G3V1P5;Q96RN5-3;Q96RN5-2;Q96RN5;B4DM43;H7C308	2;2;2;2;2;1;1	2;2;2;2;2;1;1	2;2;2;2;2;1;1	0	19348000	22639000	Mediator of RNA polymerase II transcription subunit 15	MED15	;;;;;;	7	2	2	2	1	2	2	1	2	2	1	2	2	4.4	4.4	4.4	71.462	637	637;722;677;748;788;189;194	1	15	0.0044939	2.0489	2.8	4.4	4.4	141520000	0	18161000	23844000	1	2	1	5
F5H012;P19474;P19474-2;H0YDP8	F5H012;P19474;P19474-2	13;13;11;3	13;13;11;3	13;13;11;3	317170000	273560000	329710000	E3 ubiquitin-protein ligase TRIM21	TRIM21	;;	4	13	13	13	10	7	9	10	7	9	10	7	9	34.5	34.5	34.5	54.081	475	475;475;398;90	1	116	0	97.346	29.1	20.4	24	3660100000	383740000	262210000	317110000	6	2	4	46
F5H0B0;H0YC44;P55327-8;H0YC42;U3KQQ8	F5H0B0;H0YC44;P55327-8	10;5;5;2;1	2;0;0;2;1	0;0;0;0;0	43772000	45551000	39099000	Tumor protein D52	TPD52	;;	5	10	2	0	10	8	7	2	2	2	0	0	0	42.8	7.6	0	31.17	278	278;148;151;94;83	1	25	0	4.9827	42.8	30.2	26.3	505990000	43368000	46521000	36589000	0	0	2	7
F5H0L8;Q9Y6Y8;Q9Y6Y8-2;H7C0V8;H7C4C4	F5H0L8;Q9Y6Y8;Q9Y6Y8-2	10;10;9;3;2	10;10;9;3;2	10;10;9;3;2	103190000	92185000	79366000	SEC23-interacting protein	SEC23IP	;;	5	10	10	10	7	7	6	7	7	6	7	7	6	16.7	16.7	16.7	89.666	789	789;1000;924;194;153	1	71	0	17.608	12	10.3	9.1	1118800000	138310000	95999000	75319000	3	3	2	32
F5H144;Q9Y653-5;Q9Y653-2;Q9Y653-3;Q9Y653;H3BSJ6;H3BRH0;Q9Y653-4;H3BNH4;H3BV52	F5H144;Q9Y653-5;Q9Y653-2;Q9Y653-3;Q9Y653;H3BSJ6;H3BRH0;Q9Y653-4	5;5;5;5;5;3;3;3;1;1	5;5;5;5;5;3;3;3;1;1	5;5;5;5;5;3;3;3;1;1	126650000	118550000	133490000	G-protein coupled receptor 56;GPR56 N-terminal fragment;GPR56 C-terminal fragment	GPR56;ADGRG1	;;;;;;;	10	5	5	5	5	4	5	5	4	5	5	4	5	12.5	12.5	12.5	57.375	512	512;518;687;692;693;187;256;523;198;199	1	69	0	16.514	12.5	10.2	12.5	1486500000	147910000	107100000	128270000	1	3	3	20
F5H170;Q8WW22-3;Q8WW22;Q8WW22-2	F5H170;Q8WW22-3;Q8WW22;Q8WW22-2	2;2;2;2	2;2;2;2	2;2;2;2	151150000	0	0	DnaJ homolog subfamily A member 4	DNAJA4	;;;	4	2	2	2	2	1	1	2	1	1	2	1	1	4.1	4.1	4.1	24.377	219	219;370;397;426	1	22	0.0093586	1.7043	4.1	4.1	3.7	1557500000	123900000	50977000	115100000	1	1	1	11
F5H1G9;F8WA55;F8WA56;A6NFN2;Q8IZP0-10;Q8IZP0-8;Q8IZP0-7;Q8IZP0-2;Q8IZP0-4;Q8IZP0-3;Q8IZP0-5;Q8IZP0-6;Q8IZP0-9;Q8IZP0;Q8IZP0-12;Q8IZP0-11;E9PEZ7;E7EW77;E7EP65;J3KNB2;Q9NYB9-3;Q9NYB9-2;Q9NYB9-4;Q9NYB9;H0Y6B5;F8WAL6	F5H1G9;F8WA55;F8WA56;A6NFN2;Q8IZP0-10;Q8IZP0-8;Q8IZP0-7;Q8IZP0-2;Q8IZP0-4;Q8IZP0-3;Q8IZP0-5;Q8IZP0-6;Q8IZP0-9;Q8IZP0;Q8IZP0-12;Q8IZP0-11	8;8;8;8;8;8;8;8;8;8;8;8;8;8;7;6;2;2;2;2;2;2;2;2;1;1	8;8;8;8;8;8;8;8;8;8;8;8;8;8;7;6;2;2;2;2;2;2;2;2;1;1	8;8;8;8;8;8;8;8;8;8;8;8;8;8;7;6;2;2;2;2;2;2;2;2;1;1	118330000	119680000	122140000	Abl interactor 1	ABI1	;;;;;;;;;;;;;;;	26	8	8	8	6	4	3	6	4	3	6	4	3	26.9	26.9	26.9	43.473	394	394;423;482;509;388;393;422;446;451;452;476;480;481;508;496;329;458;480;486;513;401;475;507;513;293;299	1	52	0	19.025	22.3	13.5	7.4	1438000000	200960000	92331000	104870000	6	1	2	28
F5H1H0;F5H025;P32004-3;P32004-2;P32004;H0Y5C3;E7EVM4;E7EPI4;E9PHJ4;H3BLW5	F5H1H0;F5H025;P32004-3;P32004-2;P32004	35;35;35;35;35;6;4;4;3;1	35;35;35;35;35;6;4;4;3;1	32;32;32;32;32;6;1;1;0;1	2829800000	2713700000	2957900000	Neural cell adhesion molecule L1	L1CAM	;;;;	10	35	35	32	32	25	28	32	25	28	29	22	25	37.4	37.4	35.4	139.67	1255	1255;1259;1248;1253;1257;190;128;150;83;153	1	531	0	323.31	34.3	26.3	29.6	34856000000	2682300000	2508900000	2797900000	25	24	24	318
F5H1S8;Q14165;H0YG07;F5GX14	F5H1S8;Q14165;H0YG07	6;6;3;2	6;6;3;2	6;6;3;2	194510000	202260000	186430000	Malectin	MLEC	;;	4	6	6	6	6	6	6	6	6	6	6	6	6	54.1	54.1	54.1	16.729	146	146;292;173;217	1	78	0	11.132	54.1	54.1	54.1	2431800000	215410000	181550000	194890000	3	2	4	33
F5H1S9;G8JLB3;Q9Y606-2;Q9Y606;F5GY32	F5H1S9;G8JLB3;Q9Y606-2;Q9Y606	4;4;4;4;1	4;4;4;4;1	4;4;4;4;1	46554000	47136000	47597000	tRNA pseudouridine synthase;tRNA pseudouridine synthase A, mitochondrial	PUS1	;;;	5	4	4	4	4	3	3	4	3	3	4	3	3	11.8	11.8	11.8	41.729	374	374;384;399;427;153	1	38	0	5.032	11.8	8.3	8.3	507590000	55301000	38105000	42235000	2	0	1	7
F5H1Y4;Q9HD26-2;Q9HD26;Q9HD26-3	F5H1Y4;Q9HD26-2;Q9HD26;Q9HD26-3	12;12;12;7	12;12;12;7	12;12;12;7	225190000	198270000	221170000	Golgi-associated PDZ and coiled-coil motif-containing protein	GOPC	;;;	4	12	12	12	9	8	8	9	8	8	9	8	8	36.4	36.4	36.4	50.584	462	462;454;462;319	1	98	0	55.786	24.7	21.9	25.8	2486300000	201980000	134870000	255620000	5	8	3	53
F5H1Z7;Q99985;B4DRL8	F5H1Z7;Q99985	8;8;2	8;8;2	8;8;2	116210000	102920000	97294000	Semaphorin-3C	SEMA3C	;	3	8	8	8	4	5	5	4	5	5	4	5	5	15.2	15.2	15.2	87.284	769	769;751;233	1	57	0	21.125	7.2	10.1	10.1	1290600000	94130000	99453000	106610000	3	2	2	26
F5H2A7;P61758	F5H2A7;P61758	9;9	9;9	9;9	549830000	598780000	553510000	Prefoldin subunit 3	VBP1	;	2	9	9	9	9	7	8	9	7	8	9	7	8	45.3	45.3	45.3	22.286	192	192;197	1	114	0	55.995	45.3	35.4	40.6	6489100000	552410000	549620000	570570000	4	4	2	44
F5H2H5;Q86XL3;Q86XL3-2;F5H6J0;F5H417;F5H1D4;Q86XL3-3	F5H2H5;Q86XL3;Q86XL3-2	9;9;7;2;2;1;1	9;9;7;2;2;1;1	9;9;7;2;2;1;1	92570000	92532000	73716000	Ankyrin repeat and LEM domain-containing protein 2	ANKLE2	;;	7	9	9	9	7	5	6	7	5	6	7	5	6	16	16	16	97.722	876	876;938;648;129;251;258;293	1	65	0	21.491	12	7.9	11.6	1058400000	118290000	78633000	77862000	4	2	2	31
F5H2J3;Q96GC9;K7EL93;K7EL74;K7ENU2;K7EK01;K7EMI0;K7ELS2;K7EL46;K7EPE7;B4DED7;B4DGZ7;B4DVV9	F5H2J3;Q96GC9;K7EL93;K7EL74;K7ENU2;K7EK01;K7EMI0;K7ELS2	3;3;2;2;2;2;2;2;1;1;1;1;1	3;3;2;2;2;2;2;2;1;1;1;1;1	3;3;2;2;2;2;2;2;1;1;1;1;1	57275000	74373000	66501000	Vacuole membrane protein 1	VMP1	;;;;;;;	13	3	3	3	3	3	2	3	3	2	3	3	2	15.1	15.1	15.1	40.075	350	350;406;74;75;78;92;138;167;58;225;272;309;214	1	32	0	5.2626	15.1	15.1	10.6	751490000	68117000	78928000	58165000	2	2	1	14
F5H2S7;Q13561;Q13561-3;Q13561-2;F5H223;H0YI98;F8W1I6;F8VW18;F8VX93;F8VRV7;H0YHL1;F8W0U6	F5H2S7;Q13561;Q13561-3;Q13561-2;F5H223;H0YI98;F8W1I6	17;17;17;17;16;12;12;8;4;4;3;1	17;17;17;17;16;12;12;8;4;4;3;1	17;17;17;17;16;12;12;8;4;4;3;1	828630000	892980000	925810000	Dynactin subunit 2	DCTN2	;;;;;;	12	17	17	17	12	12	15	12	12	15	12	12	15	62.3	62.3	62.3	44.809	406	406;401;403;406;378;268;315;278;135;152;128;45	1	218	0	134.88	45.3	42.4	53	10788000000	778210000	794150000	898700000	8	5	7	88
F5H2V0;D3YTF9;Q9NNW7;F5H1L4;E7ENA2;D3YTF8;Q9NNW7-2;E7EWK1;Q9NNW7-3;Q9NNW7-4	F5H2V0;D3YTF9;Q9NNW7;F5H1L4;E7ENA2;D3YTF8;Q9NNW7-2;E7EWK1;Q9NNW7-3	13;13;13;12;12;12;12;10;8;4	12;12;12;11;11;11;11;9;8;4	12;12;12;11;11;11;11;9;8;4	101930000	93717000	96005000	Thioredoxin reductase 2, mitochondrial	TXNRD2	;;;;;;;;	10	13	12	12	8	9	4	7	8	3	7	8	3	42.6	39.7	39.7	56.228	521	521;523;524;492;494;499;498;338;428;277	1	79	0	20.128	23	27.8	14	1198500000	114430000	90903000	40892000	1	1	0	28
F5H2V5;E9PS00;Q9Y5Q0;E9PPZ4;E9PQC2;E9PKP8	F5H2V5;E9PS00;Q9Y5Q0	3;3;3;1;1;1	3;3;3;1;1;1	3;3;3;1;1;1	0	0	37815000	Fatty acid desaturase 3	FADS3	;;	6	3	3	3	2	1	2	2	1	2	2	1	2	9.1	9.1	9.1	43.649	385	385;417;445;188;199;330	1	19	0.00025873	3.1313	6.5	2.6	5.2	378210000	41568000	8302600	13624000	0	0	1	5
F5H315;Q9HCS7	F5H315;Q9HCS7	3;3	3;3	3;3	33161000	33229000	30172000	Pre-mRNA-splicing factor SYF1	XAB2	;	2	3	3	3	2	2	2	2	2	2	2	2	2	4.5	4.5	4.5	99.679	852	852;855	1	25	0	10.547	3.3	2.5	2.5	328480000	32930000	35179000	31306000	1	1	2	7
F5H357;B4E3T4;Q93062-4;Q93062-5;Q93062;Q93062-2;Q93062-3;H0YBU9;Q6ZRY4	F5H357;B4E3T4;Q93062-4;Q93062-5;Q93062;Q93062-2;Q93062-3	3;3;3;3;3;3;3;1;1	3;3;3;3;3;3;3;1;1	3;3;3;3;3;3;3;1;1	0	20743000	21174000	RNA-binding protein with multiple splicing	RBPMS	;;;;;;	9	3	3	3	2	3	3	2	3	3	2	3	3	23.5	23.5	23.5	17.135	153	153;224;143;152;196;204;219;119;209	1	27	0	6.9173	19	23.5	23.5	202410000	11158000	22990000	17904000	1	1	1	10
F5H365;Q15436;F5H6C4;B3KXI2;G3V5X8;G3V4Q2;G3V4V1;G3V1W4;G3V3G5;G3V2R6;G3V5K1	F5H365;Q15436;F5H6C4;B3KXI2	26;26;21;20;4;4;4;4;4;4;2	26;26;21;20;4;4;4;4;4;4;2	24;24;20;19;3;3;3;3;3;3;1	1084900000	1084800000	1109200000	Protein transport protein Sec23A	SEC23A	;;;	11	26	26	24	23	19	23	23	19	23	21	17	21	50.5	50.5	47.3	82.968	736	736;765;663;563;85;86;93;108;140;169;40	1	336	0	323.01	42.4	39.1	45.8	14313000000	1226500000	909800000	1251200000	16	10	18	182
F5H442;Q99816;Q99816-2;J3QRU6;J3QKS4	F5H442;Q99816	7;7;3;1;1	7;7;3;1;1	7;7;3;1;1	112830000	0	0	Tumor susceptibility gene 101 protein	TSG101	;	5	7	7	7	4	2	3	4	2	3	4	2	3	27.4	27.4	27.4	40.917	365	365;390;285;63;77	1	45	0	35.471	14	7.1	10.1	1152900000	106900000	52789000	44720000	1	1	0	16
F5H4E4;Q9HA64;I3L2G3;I3L139;I3L2K8;I3L3W5;I3L378	F5H4E4;Q9HA64;I3L2G3;I3L139	4;4;2;2;1;1;1	4;4;2;2;1;1;1	4;4;2;2;1;1;1	103950000	0	0	Ketosamine-3-kinase	FN3KRP	;;;	7	4	4	4	4	2	1	4	2	1	4	2	1	22	22	22	28.964	259	259;309;127;145;50;102;124	1	30	0	12.776	22	12.4	5	900330000	121630000	40553000	19163000	1	0	0	3
F5H4G7;F5GYL8;O60684;Q5TFJ7;O15131;S4R3E5	F5H4G7;F5GYL8;O60684	15;15;15;7;7;4	15;15;15;7;7;4	9;9;9;3;2;4	428350000	500560000	383060000	Importin subunit alpha-7	KPNA6	;;	6	15	15	9	12	8	10	12	8	10	7	3	5	34.9	34.9	25.3	59.667	533	533;541;536;321;536;186	1	162	0	104.97	31	20.5	26.1	5106800000	488650000	387520000	394320000	11	7	8	94
F5H4J2;O75381-2;O75381	F5H4J2;O75381-2;O75381	5;5;5	5;5;5	5;5;5	108790000	103710000	118850000	Peroxisomal membrane protein PEX14	PEX14	;;	3	5	5	5	5	5	3	5	5	3	5	5	3	22	22	22	34.216	313	313;334;377	1	64	0	11.438	22	22	18.2	1230300000	122330000	90656000	145980000	4	4	3	28
F5H4K0;Q5T9L3;Q5T9L3-2;Q5T9L3-3;E9PM62;E9PKJ0;E9PJW4;H0YCG9;E9PQK1;Q7Z430;E9PM23;H0YDL2	F5H4K0;Q5T9L3;Q5T9L3-2;Q5T9L3-3;E9PM62;E9PKJ0;E9PJW4;H0YCG9	7;7;7;6;5;4;4;4;3;2;1;1	7;7;7;6;5;4;4;4;3;2;1;1	7;7;7;6;5;4;4;4;3;2;1;1	196860000	194580000	208810000	Protein wntless homolog	WLS	;;;;;;;	12	7	7	7	6	7	7	6	7	7	6	7	7	14.7	14.7	14.7	62.719	545	545;541;543;450;222;122;134;200;152;127;38;152	1	89	0	13.556	12.1	14.7	14.7	2565200000	200790000	193630000	222270000	3	3	3	41
F5H4Z3;Q5QPM7;Q92530;H0Y555;Q5QPM9;E7ER20	F5H4Z3;Q5QPM7;Q92530;H0Y555;Q5QPM9;E7ER20	2;2;2;1;1;1	2;2;2;1;1;1	2;2;2;1;1;1	56163000	48311000	55556000	Proteasome inhibitor PI31 subunit	PSMF1	;;;;;	6	2	2	2	2	2	2	2	2	2	2	2	2	15.4	15.4	15.4	19.29	175	175;263;271;107;183;201	1	36	0	5.6877	15.4	15.4	15.4	802520000	44784000	47623000	55795000	1	2	2	14
F5H569;Q93050-1;Q93050;Q93050-3;B7Z641;B7Z2A9;K7EM24;K7EN36;K7EPG4;F5H1T6	F5H569;Q93050-1;Q93050;Q93050-3;B7Z641;B7Z2A9	4;4;4;4;3;3;1;1;1;1	4;4;4;4;3;3;1;1;1;1	3;3;3;3;2;2;1;1;1;0	50983000	0	38497000	V-type proton ATPase 116 kDa subunit a isoform 1;V-type proton ATPase subunit a	ATP6V0A1	;;;;;	10	4	4	3	4	2	4	4	2	4	3	1	3	5.7	5.7	4.8	96.313	837	837;831;837;838;788;794;130;195;198;483	1	42	0	7.1765	5.7	2.9	5.7	523090000	45740000	9231100	46433000	2	1	0	15
F5H577;Q8WUW1;Q8WUW1-2	F5H577;Q8WUW1;Q8WUW1-2	3;3;3	3;3;3	3;3;3	92908000	87434000	73304000	Protein BRICK1	BRK1	;;	3	3	3	3	2	3	3	2	3	3	2	3	3	30.5	30.5	30.5	11.945	105	105;75;106	1	33	0	8.8139	20	30.5	30.5	1104200000	63805000	93686000	91806000	0	1	1	10
F5H5D3;Q9BQE3;F8VVB9;F8VS66;F8VRZ4;F8VWV9;F8VX09;C9K0S6;F8VRK0;F8W0F6;Q9H853;F8VXZ7	F5H5D3;Q9BQE3;F8VVB9	29;29;15;8;7;5;4;2;2;2;2;1	2;2;0;0;0;0;0;0;0;0;0;0	2;2;0;0;0;0;0;0;0;0;0;0	1290700000	1033500000	1173300000	Tubulin alpha-1C chain	TUBA1C;TUBA1B	;;	12	29	2	2	24	24	26	2	2	2	2	2	2	66.1	7.9	7.9	57.73	519	519;449;246;130;112;81;75;47;49;231;241;26	1	90	0	188.27	59.5	65.9	66.1	15722000000	1327700000	1256000000	1907100000	8	8	7	79
F5H5I6;H0Y8R1;H0YAK1;Q12849-5;Q12849;H0YAM1	F5H5I6;H0Y8R1;H0YAK1;Q12849-5;Q12849	12;12;12;12;12;4	12;12;12;12;12;4	12;12;12;12;12;4	221360000	256460000	249650000	G-rich sequence factor 1	GRSF1	;;;;	6	12	12	12	8	8	9	8	8	9	8	8	9	49.7	49.7	49.7	41.634	362	362;417;453;318;480;114	1	112	0	52.028	33.7	29.3	34	2881100000	188980000	201030000	308040000	4	4	6	60
F5H5Y2;P43307-2;P43307;C9J3L8;C9J5W0;E9PAL7;C9IZQ1;C9JBX5;C9JY01	F5H5Y2;P43307-2;P43307;C9J3L8;C9J5W0;E9PAL7;C9IZQ1	6;6;6;5;5;5;5;2;1	6;6;6;5;5;5;5;2;1	6;6;6;5;5;5;5;2;1	1146500000	1167400000	1150100000	Translocon-associated protein subunit alpha	SSR1	;;;;;;	9	6	6	6	6	5	6	6	5	6	6	5	6	29.7	29.7	29.7	29.42	259	259;259;286;265;266;291;298;218;103	1	118	0	129.1	29.7	29.7	29.7	13931000000	931250000	1218800000	1379500000	7	7	7	91
F5H619;Q86XA9-2;Q86XA9;B5MC49;H7C5W6;E9PB09;F8VQQ6;H0YIW3;Q86XA9-3	F5H619;Q86XA9-2;Q86XA9;B5MC49;H7C5W6;E9PB09	7;7;7;6;4;4;2;2;2	7;7;7;6;4;4;2;2;2	6;6;6;5;4;4;1;2;1	26896000	0	28292000	HEAT repeat-containing protein 5A	HEATR5A	;;;;;	9	7	7	6	5	2	2	5	2	2	5	2	2	5	5	3.9	222.7	2046	2046;1965;2040;1140;1599;1753;87;896;113	1	39	0	7.0311	3.5	1.3	1.5	357950000	38435000	23355000	24781000	0	1	1	9
F5H698;Q9P2J5;B4DER1;B4DJ10	F5H698;Q9P2J5;B4DER1;B4DJ10	42;42;41;41	42;42;41;41	42;42;41;41	2067100000	2019200000	1986900000	Leucine--tRNA ligase, cytoplasmic	LARS	;;;	4	42	42	42	35	33	33	35	33	33	35	33	33	46.9	46.9	46.9	129.21	1130	1130;1176;1149;1122	1	507	0	241.88	39.5	37.4	35.3	25222000000	2278100000	1879700000	1798200000	28	24	20	309
F5H6E2;O00159-3;O00159;O00159-2;I3L501;I3L204;I3L168;I3L3F5;I3L4D4;I3L3Y6	F5H6E2;O00159-3;O00159;O00159-2	17;17;17;16;3;3;2;2;2;2	17;17;17;16;3;3;2;2;2;2	17;17;17;16;3;3;2;2;2;2	193040000	163700000	189860000	Unconventional myosin-Ic	MYO1C	;;;	10	17	17	17	9	13	13	9	13	13	9	13	13	23	23	23	118.99	1039	1039;1044;1063;1028;168;267;134;137;164;170	1	144	0	47.083	12.9	18.7	18.7	2366500000	134610000	190080000	264900000	4	8	7	65
F5H6I0;P61769	F5H6I0;P61769	4;4	4;4	1;1	5681200000	6311800000	6117200000	Beta-2-microglobulin;Beta-2-microglobulin form pI 5.3	B2M	;	2	4	4	1	3	3	3	3	3	3	1	1	1	53.3	53.3	18	13.972	122	122;119	1	83	0	56.628	34.4	34.4	34.4	72760000000	4715300000	5896500000	5877500000	6	7	7	70
F5H6U7;Q9Y3E0;G3V1U5;F5GWD8;F5GXH6	F5H6U7;Q9Y3E0;G3V1U5	3;3;2;1;1	3;3;2;1;1	3;3;2;1;1	139610000	142530000	102850000	Vesicle transport protein GOT1B	GOLT1B	;;	5	3	3	3	3	3	3	3	3	3	3	3	3	18.8	18.8	18.8	14.307	128	128;138;74;40;42	1	59	0	20.312	18.8	18.8	18.8	1594500000	142530000	135600000	126590000	4	2	3	47
F5H6Y0;H3BMM5;Q96AX1;F5H7N5	F5H6Y0;H3BMM5;Q96AX1	4;4;4;1	4;4;4;1	4;4;4;1	18331000	21803000	15051000	Vacuolar protein sorting-associated protein 33A	VPS33A	;;	4	4	4	4	3	2	3	3	2	3	3	2	3	23.7	23.7	23.7	21.226	186	186;538;596;42	1	38	0	5.5082	19.9	14	19.9	249070000	18059000	24624000	20103000	2	1	1	19
F5H715;Q96BJ3;Q96BJ3-2;Q96BJ3-3	F5H715;Q96BJ3	7;7;3;3	7;7;3;3	7;7;3;3	82773000	90573000	83926000	Axin interactor, dorsalization-associated protein	AIDA	;	4	7	7	7	5	6	4	5	6	4	5	6	4	35.5	35.5	35.5	32.021	282	282;306;141;224	1	66	0	13.821	21.6	28	14.9	1049900000	80723000	74701000	55977000	2	4	2	22
F5H7B0;Q15477;H7C5N0;H7C4L3	F5H7B0;Q15477	13;13;2;1	13;13;2;1	13;13;2;1	108020000	113030000	108850000	Helicase SKI2W	SKIV2L	;	4	13	13	13	9	8	10	9	8	10	9	8	10	16	16	16	116.48	1053	1053;1246;156;182	1	107	0	22.482	10.4	9.3	12.5	1369900000	108590000	99166000	145610000	3	2	0	24
F5H843;O60669	F5H843;O60669	2;2	2;2	2;2	49118000	41526000	43276000	Monocarboxylate transporter 2	SLC16A7	;	2	2	2	2	2	2	2	2	2	2	2	2	2	5	5	5	41.718	379	379;478	1	24	0.0002635	3.3582	5	5	5	501170000	48711000	38891000	43350000	2	1	1	14
F5H8E5;Q93009-3;Q93009;H3BND8;F5H2X1	F5H8E5;Q93009-3;Q93009;H3BND8	16;16;16;13;5	16;16;16;13;5	16;16;16;13;5	242820000	256160000	248330000	Ubiquitin carboxyl-terminal hydrolase 7;Ubiquitin carboxyl-terminal hydrolase	USP7	;;;	5	16	16	16	10	12	11	10	12	11	10	12	11	20.2	20.2	20.2	117	1003	1003;1086;1102;909;509	1	152	0	80.933	13.6	15.2	12	3248700000	190620000	271940000	236210000	6	6	3	63
F5H8F7;Q9UBL3-2;Q9UBL3-3;Q9UBL3;H0YBF6	F5H8F7;Q9UBL3-2;Q9UBL3-3;Q9UBL3	4;4;4;4;1	4;4;4;4;1	4;4;4;4;1	33901000	39850000	41402000	Set1/Ash2 histone methyltransferase complex subunit ASH2	ASH2L	;;;	5	4	4	4	4	3	2	4	3	2	4	3	2	10.6	10.6	10.6	55.324	489	489;501;534;628;192	1	31	0	9.9211	10.6	9	5.3	399300000	38566000	38942000	33261000	3	1	1	13
F5H8H2;Q03426;F5H092;B7Z1C2;F5H163;F5H368;F5GXC0	F5H8H2;Q03426;F5H092;B7Z1C2	4;4;2;2;1;1;1	4;4;2;2;1;1;1	4;4;2;2;1;1;1	0	62773000	70860000	Mevalonate kinase	MVK	;;;	7	4	4	4	4	4	4	4	4	4	4	4	4	17.4	17.4	17.4	37.171	344	344;396;200;202;83;117;170	1	49	0	4.5414	17.4	17.4	17.4	763570000	62841000	54798000	88978000	0	1	1	6
F6S0T5;O60341;O60341-2;R4GMQ1;R4GMP9	F6S0T5;O60341;O60341-2	13;13;13;3;3	13;13;13;3;3	13;13;13;3;3	95850000	97645000	120320000	Lysine-specific histone demethylase 1A	KDM1A	;;	5	13	13	13	4	6	7	4	6	7	4	6	7	24.7	24.7	24.7	95.222	876	876;852;876;189;301	1	76	0	40.341	6.2	10.2	12.4	1248000000	61193000	106520000	133550000	1	0	3	25
F6T1Q0;Q6L8Q7-2;Q6L8Q7	F6T1Q0;Q6L8Q7-2;Q6L8Q7	8;8;8	8;8;8	8;8;8	115240000	84958000	103920000	2,5-phosphodiesterase 12	PDE12	;;	3	8	8	8	5	4	7	5	4	7	5	4	7	30.9	30.9	30.9	52.175	472	472;535;609	1	65	0	17.097	13.6	11.9	23.7	1355700000	106190000	80239000	126950000	3	2	3	28
F6TR53;Q53T59;B5MC96	F6TR53;Q53T59;B5MC96	3;3;2	3;3;2	3;3;2	0	45212000	41904000	HCLS1-binding protein 3	HS1BP3	;;	3	3	3	3	2	3	3	2	3	3	2	3	3	16.9	16.9	16.9	23.6	213	213;392;199	1	28	0	7.3297	13.1	16.9	16.9	418140000	37426000	44796000	43301000	0	2	0	5
F6U1T9;D3YTA9;P63098;H7BYZ3	F6U1T9;D3YTA9;P63098;H7BYZ3	8;8;8;6	8;8;8;6	8;8;8;6	257760000	280000000	234840000	Calcineurin subunit B type 1	PPP3R1	;;;	4	8	8	8	7	5	7	7	5	7	7	5	7	65.6	65.6	65.6	18.208	160	160;189;170;331	1	86	0	39.36	60.6	41.9	60.6	2982300000	266730000	254830000	211280000	6	5	2	60
F6UJY9;J9JIE9;E7EWH8;F6UJY1;Q5T013-3;Q5T013;H0YB18;H0YB70;Q5T015;Q5T013-2;Q5T013-4	F6UJY9;J9JIE9;E7EWH8;F6UJY1;Q5T013-3;Q5T013;H0YB18;H0YB70;Q5T015;Q5T013-2;Q5T013-4	2;2;2;2;2;2;1;1;1;1;1	2;2;2;2;2;2;1;1;1;1;1	2;2;2;2;2;2;1;1;1;1;1	37483000	45691000	25871000	Hydroxypyruvate isomerase;Putative hydroxypyruvate isomerase	HYI	;;;;;;;;;;	11	2	2	2	2	2	2	2	2	2	2	2	2	15	15	15	23.031	213	213;238;276;302;247;277;161;186;229;174;204	1	28	0	10.224	15	15	15	377100000	47945000	63614000	33817000	1	2	2	16
F8VPV9;F8W079;H0YI37;F8VQY0	F8VPV9;F8W079	25;14;7;4	1;0;0;0	1;0;0;0	1672000000	0	0		ATP5B	;	4	25	1	1	23	22	22	1	0	0	1	0	0	71.8	3.7	3.7	55.308	518	518;284;133;218	1	1	1	-2	65.8	62.2	62.2	1672000000	1672000000	0	0	1	0	0	1
F8VQ10;Q13838;Q13838-2;Q5STU3;B4DP52;F6WLT2;F6UJC5;F6S4E6;F6TRA5;B4DIJ6;H0Y400;F6QYI9;F6R6M7;H0YCC6;K7EN69;K7ENP6;F6QWI5;K7EL56;K7EIL8;F6U6E2;F6S2B7;F6SXL5;E7EMX2;K7EN25	F8VQ10;Q13838;Q13838-2;Q5STU3;B4DP52;F6WLT2;F6UJC5;F6S4E6;F6TRA5	22;22;22;19;18;15;12;11;11;9;7;6;6;5;4;3;3;3;3;3;3;3;3;3	22;22;22;19;18;15;12;11;11;9;7;6;6;5;4;3;3;3;3;3;3;3;3;3	10;10;10;9;10;6;7;3;3;4;3;1;1;4;0;0;0;0;0;0;0;0;0;0	4303100000	4253300000	4807600000	Spliceosome RNA helicase DDX39B	DDX39B;hCG_2005638	;;;;;;;;	24	22	22	10	21	22	22	21	22	22	10	10	10	57.1	57.1	27.8	50.745	443	443;428;443;425;350;289;245;231;238;243;187;187;197;141;130;92;96;108;125;125;132;136;139;176	1	391	0	247.38	56.9	57.1	57.1	54106000000	4289500000	3884600000	4503200000	23	20	24	298
F8VSC5;Q6P3W7;F8VPW3;H0YIK6	F8VSC5;Q6P3W7	5;5;1;1	5;5;1;1	5;5;1;1	40585000	45523000	0	SCY1-like protein 2	SCYL2	;	4	5	5	5	3	2	2	3	2	2	3	2	2	10.6	10.6	10.6	77.053	681	681;929;76;115	1	38	0	9.6591	5.7	3.4	3.4	485400000	36941000	24106000	35728000	1	1	0	12
F8VSZ4;Q9UIW2;Q9HCM2-4;Q9HCM2	F8VSZ4;Q9UIW2	3;3;1;1	3;3;1;1	1;1;1;1	18540000	0	17518000	Plexin-A1	PLXNA1	;	4	3	3	1	3	2	2	3	2	2	1	0	0	1.8	1.8	0.8	208.55	1873	1873;1896;344;1894	1	20	0.0029268	2.3883	1.8	1	1	111880000	20803000	4095200	15420000	0	1	0	8
F8VU90;Q9NYL4-2;Q9NYL4;H0YHM7;E9PAR0	F8VU90;Q9NYL4-2;Q9NYL4	3;3;3;1;1	3;3;3;1;1	3;3;3;1;1	78165000	77151000	84286000	Peptidyl-prolyl cis-trans isomerase;Peptidyl-prolyl cis-trans isomerase FKBP11	FKBP11	;;	5	3	3	3	3	3	2	3	3	2	3	3	2	21.4	21.4	21.4	19.814	182	182;146;201;63;99	1	32	0	31.963	21.4	21.4	15.9	766070000	74973000	48470000	59086000	3	0	1	14
F8VV56;F8W022;F8VWK8;C9JV86;P08962-3;P08962-2;P08962;F8VNT9	F8VV56;F8W022;F8VWK8;C9JV86;P08962-3;P08962-2;P08962;F8VNT9	5;5;5;5;5;5;5;3	5;5;5;5;5;5;5;3	5;5;5;5;5;5;5;3	1318200000	1024700000	1044800000	Tetraspanin;CD63 antigen	CD63	;;;;;;;	8	5	5	5	4	3	5	4	3	5	4	3	5	29	29	29	16.021	145	145;215;217;236;156;215;238;133	1	54	0	25.062	29	13.8	29	13503000000	1420300000	1075800000	1157100000	5	3	4	38
F8VVA7;P61923;F8VYZ4;P61923-5;P61923-4;F8VXB1;F8W156;F8W651;F8VUC5;F8VXR1;P61923-3;F8VYK5;F8VYE0;P61923-2	F8VVA7;P61923;F8VYZ4;P61923-5;P61923-4;F8VXB1;F8W156;F8W651;F8VUC5;F8VXR1;P61923-3	6;6;5;5;5;4;4;4;3;3;3;2;2;2	6;6;5;5;5;4;4;4;3;3;3;2;2;2	6;6;5;5;5;4;4;4;3;3;3;2;2;2	328330000	432570000	416280000	Coatomer subunit zeta-1	COPZ1	;;;;;;;;;;	14	6	6	6	5	4	4	5	4	4	5	4	4	52	52	52	22.34	198	198;177;163;160;185;92;107;119;95;138;154;89;164;126	1	84	0	170.88	46.5	29.8	29.8	4715300000	370870000	333560000	361110000	7	6	6	78
F8VW96;Q16527;F8VQR7	F8VW96;Q16527;F8VQR7	5;5;4	5;5;4	5;5;4	161960000	132110000	137540000	Cysteine and glycine-rich protein 2	CSRP2	;;	3	5	5	5	3	5	5	3	5	5	3	5	5	25.9	25.9	25.9	26.736	243	243;193;187	1	57	0	15.228	17.7	25.9	25.9	1623100000	136700000	159150000	161960000	3	2	0	21
F8VX04;Q9H2H9;F8VX12	F8VX04;Q9H2H9	4;4;1	4;4;1	4;4;1	122920000	162800000	121060000	Sodium-coupled neutral amino acid transporter 1	SLC38A1	;	3	4	4	4	4	4	2	4	4	2	4	4	2	7.2	7.2	7.2	56.195	503	503;487;78	1	29	0	9.4182	7.2	7.2	3.8	1170500000	130890000	198250000	91827000	2	4	1	20
F8VXC8;Q8TAQ2-2;Q8TAQ2-3;Q8TAQ2;F8VZW6	F8VXC8;Q8TAQ2-2;Q8TAQ2-3;Q8TAQ2	11;11;11;11;1	11;11;11;11;1	4;4;4;4;1	133460000	150780000	151800000	SWI/SNF complex subunit SMARCC2	SMARCC2	;;;	5	11	11	4	7	6	7	7	6	7	1	1	3	9.9	9.9	4.4	136.18	1245	1245;1130;1152;1214;105	1	88	0	18.705	5.3	4.6	6.7	1650900000	151000000	120700000	124460000	1	2	2	24
F8VXI9;Q14161-4;Q14161-3;Q14161;R4GNG3;F8W7V0;F8WAK2;Q14161-9;Q14161-10;Q14161-8;Q14161-5;Q14161-11;Q14161-7;Q14161-6	F8VXI9;Q14161-4;Q14161-3;Q14161;R4GNG3;F8W7V0;F8WAK2;Q14161-9;Q14161-10;Q14161-8;Q14161-5;Q14161-11;Q14161-7;Q14161-6	6;6;6;6;5;5;5;5;5;5;5;4;4;4	6;6;6;6;5;5;5;5;5;5;5;4;4;4	5;5;5;5;4;4;4;4;4;4;4;3;3;3	28981000	34961000	33430000	ARF GTPase-activating protein GIT2	GIT2	;;;;;;;;;;;;;	14	6	6	5	3	2	3	3	2	3	2	2	2	8.8	8.8	7.6	78.866	708	708;709;744;759;641;649;681;648;681;694;729;631;646;661	1	37	0	6.6974	3.7	2.5	4	394620000	28419000	25226000	30286000	0	1	1	12
F8VXY3;P00973-2;P00973-4;P00973;P00973-3;H0YI20;H0YIB8;F8VUC8;F8VPW7	F8VXY3;P00973-2;P00973-4;P00973;P00973-3;H0YI20	6;6;6;6;6;4;2;2;1	6;6;6;6;6;4;2;2;1	6;6;6;6;6;4;2;2;1	100190000	106380000	123920000	2-5-oligoadenylate synthase 1	OAS1	;;;;;	9	6	6	6	5	5	4	5	5	4	5	5	4	22.8	22.8	22.8	41.474	360	360;364;382;400;414;302;130;177;83	1	69	0	27.146	18.3	18.6	16.1	1641200000	119930000	104350000	117370000	3	3	3	36
F8VY35;F5H4R6;H0YIV4;P55209-2;P55209;F8W0J6;H0YH88;F8W020;F8VUX1;H0YHC3;F8VXI6;F8VVB5;F8VUC3;B7Z4K9	F8VY35;F5H4R6;H0YIV4;P55209-2;P55209;F8W0J6;H0YH88;F8W020;F8VUX1;H0YHC3;F8VXI6	10;10;10;10;10;8;7;7;7;6;6;4;1;1	9;9;9;9;9;7;6;6;6;5;5;3;1;1	1;1;1;1;1;1;0;1;1;0;1;1;0;0	1557500000	1556200000	1526900000	Nucleosome assembly protein 1-like 1	NAP1L1	;;;;;;;;;;	14	10	9	1	10	10	9	9	9	8	1	1	1	55.3	51.5	7.2	31.02	264	264;383;385;368;391;379;177;207;237;198;215;161;200;208	1	165	0	265.84	55.3	55.3	51.1	20640000000	1381400000	1774400000	887130000	8	11	8	112
F8VYH9;F8VTV8;F8VWX7;P11802;F8VXD2;F8VZZ0;F8VZ51;F8W1L8;B4DNF9;F8VYY1;Q96BE9	F8VYH9;F8VTV8;F8VWX7;P11802;F8VXD2;F8VZZ0;F8VZ51;F8W1L8;B4DNF9	6;6;6;6;4;4;4;3;3;2;2	5;5;5;5;3;3;3;3;2;2;2	5;5;5;5;3;3;3;3;2;2;2	97939000	106630000	135720000	Cyclin-dependent kinase 4	CDK4	;;;;;;;;	11	6	5	5	4	6	4	3	5	3	3	5	3	46.5	41.8	41.8	18.685	170	170;201;203;303;132;186;208;115;183;74;111	1	55	0	14.528	29.4	46.5	27.1	1416800000	60096000	113960000	143460000	1	4	0	20
F8W111;P14384;F8VVI6;H0YHN7	F8W111;P14384;F8VVI6	4;4;2;1	4;4;2;1	4;4;2;1	29641000	40812000	41969000	Carboxypeptidase M	CPM	;;	4	4	4	4	3	3	3	3	3	3	3	3	3	21.7	21.7	21.7	28.314	249	249;443;136;198	1	37	0	12.636	17.7	15.3	15.3	492050000	33976000	34965000	35321000	1	2	2	23
F8W1A4;P54819-2;P54819;P54819-3;F8VZG5;F8VY04;P54819-5;P54819-6;P54819-4;G3V213;F8VPP1	F8W1A4;P54819-2;P54819;P54819-3;F8VZG5;F8VY04;P54819-5;P54819-6;P54819-4;G3V213	11;11;11;10;9;9;9;8;7;6;2	11;11;11;10;9;9;9;8;7;6;2	11;11;11;10;9;9;9;8;7;6;2	927310000	858540000	904270000	Adenylate kinase 2, mitochondrial;Adenylate kinase 2, mitochondrial;Adenylate kinase 2, mitochondrial, N-terminally processed	AK2	;;;;;;;;;	11	11	11	11	11	10	11	11	10	11	11	10	11	60.8	60.8	60.8	25.63	232	232;232;239;202;162;190;224;192;131;133;42	1	214	0	103.27	60.8	56.5	60.8	11672000000	836070000	701410000	796020000	10	9	8	121
F8W1Z6;Q7Z3U7-2;F8VWA6;Q7Z3U7-5;Q7Z3U7-4;Q7Z3U7;Q7Z3U7-3;F8VZV1	F8W1Z6;Q7Z3U7-2;F8VWA6;Q7Z3U7-5;Q7Z3U7-4;Q7Z3U7;Q7Z3U7-3	7;7;7;7;7;7;4;2	7;7;7;7;7;7;4;2	7;7;7;7;7;7;4;2	68763000	66238000	65058000	Protein MON2 homolog	MON2	;;;;;;	8	7	7	7	5	6	7	5	6	7	5	6	7	4.7	4.7	4.7	185.85	1675	1675;1676;1688;1711;1717;1718;586;1072	1	71	0	10.027	3.1	3.9	4.7	860940000	49379000	54632000	90476000	4	1	2	32
F8W6G5;C9JZ40;Q7Z2E3-3;Q7Z2E3-5;Q7Z2E3-9;Q7Z2E3-10;Q7Z2E3-11;Q7Z2E3-8;Q7Z2E3-7;Q7Z2E3;Q7Z2E3-6;Q7Z2E3-2;Q7Z2E3-4;F8WBD6;E7EUY4;F8WBM3;Q6JV79;E7EVB7;C9J8U3;Q7Z2E3-12;Q7Z2E3-13	F8W6G5;C9JZ40;Q7Z2E3-3;Q7Z2E3-5;Q7Z2E3-9;Q7Z2E3-10;Q7Z2E3-11;Q7Z2E3-8;Q7Z2E3-7;Q7Z2E3;Q7Z2E3-6;Q7Z2E3-2;Q7Z2E3-4	4;4;4;4;4;4;4;4;4;4;3;3;3;1;1;1;1;1;1;1;1	4;4;4;4;4;4;4;4;4;4;3;3;3;1;1;1;1;1;1;1;1	4;4;4;4;4;4;4;4;4;4;3;3;3;1;1;1;1;1;1;1;1	33716000	0	0	Aprataxin	APTX	;;;;;;;;;;;;	21	4	4	4	2	1	1	2	1	1	2	1	1	22.2	22.2	22.2	22.763	198	198;216;284;288;292;302;306;337;342;356;113;168;254;52;63;74;85;99;155;49;192	1	21	0	6.6699	9.6	5.6	5.6	171540000	21453000	6770900	6303900	2	0	0	5
F8W6I7;P09651-3;P09651-2;P09651;F8VZ49;Q32P51;F8VTQ5;H0YH80;F8W646;F8VYN5	F8W6I7;P09651-3;P09651-2;P09651;F8VZ49;Q32P51;F8VTQ5;H0YH80	17;17;17;17;12;12;10;9;6;5	16;16;16;16;11;11;9;9;6;4	15;15;15;15;11;10;9;8;6;4	5131800000	5371000000	4968200000	Heterogeneous nuclear ribonucleoprotein A1;Heterogeneous nuclear ribonucleoprotein A1, N-terminally processed;Heterogeneous nuclear ribonucleoprotein A1-like 2	HNRNPA1;HNRNPA1L2	;;;;;;;	10	17	16	15	15	15	16	14	14	15	13	13	14	59.9	57	54.7	33.155	307	307;267;320;372;231;320;145;191;156;113	1	323	0	323.31	59	59	59.3	61643000000	5069100000	5114200000	5311100000	20	17	16	234
F8W726;Q14157-4;Q14157-1;Q14157-3;Q14157;Q14157-5;Q5VU77;Q5VU79;Q5VU78;Q5VU81;Q5VU80;H0Y5H6;H7C2T8	F8W726;Q14157-4;Q14157-1;Q14157-3;Q14157;Q14157-5	25;25;25;25;25;25;12;9;9;8;8;2;2	25;25;25;25;25;25;12;9;9;8;8;2;2	25;25;25;25;25;25;12;9;9;8;8;2;2	931420000	864310000	918800000	Ubiquitin-associated protein 2-like	UBAP2L	;;;;;	13	25	25	25	20	20	20	20	20	20	20	20	20	39.2	39.2	39.2	113.5	1078	1078;976;983;1068;1087;1104;350;265;280;182;234;383;399	1	321	0	141.21	31.8	32.9	32.9	11218000000	897940000	746730000	911360000	14	11	15	169
F8W727;P62910;D3YTB1;D3YTI8	F8W727;P62910;D3YTB1	10;10;9;2	10;10;9;2	10;10;9;2	2787800000	2800600000	2614100000	60S ribosomal protein L32	RPL32	;;	4	10	10	10	9	9	9	9	9	9	9	9	9	54.2	54.2	54.2	17.962	153	153;135;133;62	1	150	0	110.99	52.9	52.9	49.7	32364000000	2999200000	2804500000	2086300000	10	7	7	86
F8W7C6;H7C123;H7C2C5;Q96L21;H7C2U2	F8W7C6;H7C123;H7C2C5	11;6;6;5;1	1;0;0;0;0	1;0;0;0;0	192020000	293170000	226950000		RPL10	;;	5	11	1	1	9	10	9	1	1	1	1	1	1	54.6	11	11	18.592	163	163;91;131;214;28	1	24	0	51.549	54.6	54.6	54.6	2732500000	190920000	271540000	221810000	2	3	2	25
F8W7D6;F5H039;Q9NQX3;Q9NQX3-2;H0YJR5;H0YJ30;G3V582	F8W7D6;F5H039;Q9NQX3;Q9NQX3-2	3;3;3;3;1;1;1	3;3;3;3;1;1;1	3;3;3;3;1;1;1	0	31468000	31256000	Gephyrin;Molybdopterin adenylyltransferase;Molybdopterin molybdenumtransferase	GPHN	;;;	7	3	3	3	1	3	3	1	3	3	1	3	3	6.1	6.1	6.1	76.331	705	705;782;736;769;201;280;380	1	27	0	5.9719	2.8	6.1	6.1	360150000	9385800	40345000	42168000	0	1	1	11
F8W7G7;P02751-5;P02751-17;P02751-3;P02751;P02751-7;P02751-15;P02751-4;P02751-6;P02751-11;P02751-10;P02751-9;P02751-14;P02751-13;P02751-8;P02751-12;H0Y7Z1;P02751-2;P02751-16;H0Y4K8	F8W7G7;P02751-5;P02751-17;P02751-3;P02751;P02751-7;P02751-15;P02751-4;P02751-6;P02751-11;P02751-10;P02751-9;P02751-14;P02751-13;P02751-8;P02751-12	19;19;19;19;19;19;19;18;18;18;17;17;17;17;17;14;8;2;2;1	19;19;19;19;19;19;19;18;18;18;17;17;17;17;17;14;8;2;2;1	19;19;19;19;19;19;19;18;18;18;17;17;17;17;17;14;8;2;2;1	164460000	180020000	180680000	Fibronectin;Anastellin;Ugl-Y1;Ugl-Y2;Ugl-Y3	FN1	;;;;;;;;;;;;;;;	20	19	19	19	13	12	13	13	12	13	13	12	13	13.7	13.7	13.7	243.23	2211	2211;2211;2330;2355;2386;2446;2477;2031;2184;2386;2176;2240;2265;2267;2296;2008;1103;642;657;241	1	160	0	61.88	9.8	8.5	9.3	2323200000	177380000	209260000	197940000	4	7	5	76
F8W7Q4;Q96A26;E9PH05	F8W7Q4;Q96A26;E9PH05	4;4;3	4;4;3	4;4;3	184070000	154280000	141340000	Protein FAM162A	FAM162A	;;	3	4	4	4	3	2	3	3	2	3	3	2	3	25	25	25	16.515	144	144;154;141	1	43	0	24.764	24.3	19.4	20.1	1902100000	188150000	146160000	111460000	3	2	2	35
F8W8J4;Q9NZM1-6;Q9NZM1;Q9NZM1-2;Q9NZM1-5	F8W8J4;Q9NZM1-6;Q9NZM1;Q9NZM1-2;Q9NZM1-5	94;94;94;87;68	94;94;94;87;68	3;3;3;3;3	4960800000	5014400000	4857600000	Myoferlin	MYOF	;;;;	5	94	94	3	87	79	83	87	79	83	3	3	3	56.8	56.8	1.8	234.65	2061	2061;2048;2061;2019;1577	1	1259	0	323.31	53.2	45.9	49.4	62137000000	4979200000	4881800000	4941500000	68	57	66	763
F8W8J7;B8ZZS2;Q13506-2;Q13506;C9JL92;C9JID4	F8W8J7;B8ZZS2;Q13506-2;Q13506;C9JL92;C9JID4	2;2;2;2;1;1	2;2;2;2;1;1	2;2;2;2;1;1	17871000	0	0	NGFI-A-binding protein 1	NAB1	;;;;;	6	2	2	2	2	0	2	2	0	2	2	0	2	6.6	6.6	6.6	51.219	458	458;486;458;487;152;157	1	12	0.00025641	2.9532	6.6	0	6.6	102130000	17871000	0	12149000	1	0	1	6
F8W8R3;P49005;C9JLE1;C9JHC7;C9IZD2;C9J8Z7	F8W8R3;P49005;C9JLE1;C9JHC7	5;5;3;3;1;1	5;5;3;3;1;1	5;5;3;3;1;1	34304000	27079000	0	DNA polymerase delta subunit 2	POLD2	;;;	6	5	5	5	4	2	2	4	2	2	4	2	2	18.2	18.2	18.2	49.612	455	455;469;220;257;148;155	1	45	0	11.745	14.7	6.8	6.8	460200000	54491000	17284000	27564000	2	1	0	16
F8W8S0;Q13409-3;Q13409-7;Q13409-2;Q13409;Q13409-6;Q13409-5;E7EQL5;E7EV09;E7ET01;E7ETL8;E7EQU2;E7ESD3;E7EMU4;E9PGG1;E7EUM4;E7ERR6;E7ERH4;E7EU01	F8W8S0;Q13409-3;Q13409-7;Q13409-2;Q13409;Q13409-6;Q13409-5;E7EQL5	17;17;17;17;17;16;16;11;8;5;5;5;5;5;3;3;3;3;2	17;17;17;17;17;16;16;11;8;5;5;5;5;5;3;3;3;3;2	17;17;17;17;17;16;16;11;8;5;5;5;5;5;3;3;3;3;2	528040000	624950000	573620000	Cytoplasmic dynein 1 intermediate chain 2	DYNC1I2	;;;;;;;	19	17	17	17	17	11	13	17	11	13	17	11	13	41.7	41.7	41.7	71.349	638	638;612;630;632;638;611;637;305;250;173;184;185;187;214;110;137;139;151;121	1	230	0	115.07	41.7	24.1	30.7	7178100000	623300000	517750000	587320000	14	12	9	133
F8W8S3;H0YKT5;H0YKN8;H0YL70;Q04726-2;Q04726-7;Q04726-3;Q04726-6;Q04726-5;Q04726-4;Q04726;F5H7D6;H0YNT2;H0YNI7;H0YLI3;B3KQ29;H0YKH0;H0YLW9;G8JLG4;F8W9R0;Q04727-2;Q04727-4;Q04727;Q04727-3;B4DE62;K7EMK7;Q04725-2;Q04725;K7EJR7;Q04725-3	F8W8S3;H0YKT5;H0YKN8;H0YL70;Q04726-2;Q04726-7;Q04726-3;Q04726-6;Q04726-5;Q04726-4;Q04726;F5H7D6;H0YNT2;H0YNI7;H0YLI3	7;7;7;7;7;7;7;7;7;7;7;6;6;5;4;3;3;3;3;3;3;3;3;3;2;2;2;2;1;1	7;7;7;7;7;7;7;7;7;7;7;6;6;5;4;3;3;3;3;3;3;3;3;3;2;2;2;2;1;1	4;4;4;4;4;4;4;4;4;4;4;3;3;2;4;0;3;3;0;0;0;0;0;0;0;0;0;0;0;0	90649000	93199000	113570000	Transducin-like enhancer protein 3	TLE3	;;;;;;;;;;;;;;	30	7	7	4	6	7	5	6	7	5	4	4	2	14.5	14.5	9	82.611	764	764;774;778;782;760;762;764;767;769;772;772;699;716;353;611;410;445;448;704;805;704;748;773;805;410;744;621;743;280;706	1	57	0	9.8305	11.5	14.5	8.6	1034000000	116140000	123860000	95945000	4	1	2	23
F8W8Z9;Q8N4H5;Q8N4H5-3;Q8N4H5-2;H3BUX3;H0YFG9	F8W8Z9;Q8N4H5;Q8N4H5-3;Q8N4H5-2	5;5;5;5;2;2	5;5;5;5;2;2	5;5;5;5;2;2	253670000	292210000	303230000	Mitochondrial import receptor subunit TOM5 homolog	TOMM5	;;;	6	5	5	5	4	4	3	4	4	3	4	4	3	35.7	35.7	35.7	10.976	98	98;51;85;92;64;71	1	52	0	6.8785	35.7	35.7	27.6	3188700000	272090000	240270000	209320000	4	3	1	34
F8W998;H9KV37;O14936-3;O14936-4;O14936-6;O14936-2;O14936;Q5JS79;Q5JS72;Q5JS74;O14936-5	F8W998;H9KV37;O14936-3;O14936-4;O14936-6;O14936-2;O14936;Q5JS79;Q5JS72;Q5JS74;O14936-5	4;4;4;4;4;4;4;2;2;2;2	4;4;4;4;4;4;4;2;2;2;2	4;4;4;4;4;4;4;2;2;2;2	34844000	47442000	48496000	Peripheral plasma membrane protein CASK	CASK	;;;;;;;;;;	11	4	4	4	2	3	3	2	3	3	2	3	3	6.6	6.6	6.6	103.28	909	909;921;897;898;909;921;926;381;518;590;518	1	33	0	15.667	3.3	4.4	4.4	512240000	26424000	47868000	48913000	1	2	1	17
F8W9U3;Q96IU4;B4DQI4;Q96IU4-2	F8W9U3;Q96IU4;B4DQI4	7;7;6;2	7;7;6;2	7;7;6;2	268220000	215020000	189340000	Alpha/beta hydrolase domain-containing protein 14B	ABHD14B	;;	4	7	7	7	6	5	6	6	5	6	6	5	6	38.5	38.5	38.5	22.38	208	208;210;188;172	1	79	0	13.279	33.7	26.9	33.7	2795600000	318330000	143390000	206780000	3	2	2	38
F8W9X7;Q567U6;H7C050	F8W9X7;Q567U6	8;8;1	8;8;1	8;8;1	46166000	63229000	57867000	Coiled-coil domain-containing protein 93	CCDC93	;	3	8	8	8	5	2	5	5	2	5	5	2	5	15.2	15.2	15.2	73.041	630	630;631;91	1	53	0	13.822	9.4	2.5	9.4	686540000	56934000	30322000	61172000	3	1	1	22
F8WA11;Q7Z460-2;Q7Z460-4;F5GWS0;Q7Z460-3;Q7Z460;F5H2E2;F5GWM7;H0Y5T1;C9J151	F8WA11;Q7Z460-2;Q7Z460-4;F5GWS0;Q7Z460-3;Q7Z460;F5H2E2;F5GWM7	11;11;11;11;11;11;8;8;3;1	7;7;7;7;7;7;4;4;1;1	7;7;7;7;7;7;4;4;1;1	46948000	43179000	36669000	CLIP-associating protein 1	CLASP1	;;;;;;;	10	11	7	7	9	7	6	5	4	3	5	4	3	9.4	6.8	6.8	164.49	1494	1494;1471;1477;1478;1494;1538;1245;1255;704;150	1	50	0	17.399	7.7	6.4	5.5	565770000	71007000	43174000	26180000	1	2	3	22
F8WAJ0;Q9H8H2;Q9H8H2-2;Q9H8H2-4;B4E3G7;Q9H8H2-3	F8WAJ0;Q9H8H2;Q9H8H2-2;Q9H8H2-4	4;4;3;2;1;1	4;4;3;2;1;1	4;4;3;2;1;1	22826000	0	0	Probable ATP-dependent RNA helicase DDX31	DDX31	;;;	6	4	4	4	4	0	1	4	0	1	4	0	1	6.8	6.8	6.8	80.945	722	722;851;778;585;160;319	1	22	0	3.8697	6.8	0	1.1	240010000	47153000	0	8181800	2	0	0	8
F8WAS3;Q16718;C9IZN5;H7BYD0;Q16718-2	F8WAS3;Q16718;C9IZN5;H7BYD0;Q16718-2	4;4;3;3;3	4;4;3;3;3	4;4;3;3;3	105880000	98476000	116040000	NADH dehydrogenase [ubiquinone] 1 alpha subcomplex subunit 5	NDUFA5	;;;;	5	4	4	4	3	4	3	3	4	3	3	4	3	51.4	51.4	51.4	7.8423	70	70;116;93;112;116	1	54	0	12.176	37.1	51.4	51.4	1315000000	104340000	112770000	125150000	1	4	2	28
F8WAX7;A8K0M9;Q9Y6D0	F8WAX7;A8K0M9;Q9Y6D0	2;2;2	2;2;2	2;2;2	19593000	22609000	0	Selenoprotein K	SELK	;;	3	2	2	2	2	2	0	2	2	0	2	2	0	29.2	29.2	29.2	8.2912	72	72;91;94	1	13	0.0022217	2.5483	29.2	29.2	0	131070000	19984000	21944000	0	1	1	0	4
F8WCF6;P59998;P59998-3;F8WDD7;P59998-2;H7C0A3;R4GN08;P59998-4;F8WE39;F8WDW3	F8WCF6;P59998;P59998-3;F8WDD7;P59998-2;H7C0A3	11;11;10;7;7;6;5;5;3;2	11;11;10;7;7;6;5;5;3;2	11;11;10;7;7;6;5;5;3;2	1303300000	1595500000	1420100000	Actin-related protein 2/3 complex subunit 4	ARPC4-TTLL3;ARPC4	;;;;;	10	11	11	11	10	9	8	10	9	8	10	9	8	70.7	70.7	70.7	21.058	181	181;168;187;113;625;167;77;78;47;44	1	163	0	118.3	60.2	53	52.5	17915000000	1338300000	1470800000	1374600000	9	6	7	98
F8WCP6;Q7Z4S6-6;Q7Z4S6-3;Q7Z4S6-5;Q7Z4S6-2;Q7Z4S6;Q7Z4S6-4;H0YIM7;H0YI78;H0YHT2;Q2M1P5;O75037-3;O75037-4;O75037-2;O75037	F8WCP6;Q7Z4S6-6;Q7Z4S6-3;Q7Z4S6-5;Q7Z4S6-2;Q7Z4S6;Q7Z4S6-4;H0YIM7	6;6;6;6;6;6;6;3;1;1;1;1;1;1;1	6;6;6;6;6;6;6;3;1;1;1;1;1;1;1	5;5;5;5;5;5;5;2;1;1;0;0;0;0;0	55781000	60111000	0	Kinesin-like protein KIF21A;Kinesin-like protein	KIF21A	;;;;;;;	15	6	6	5	4	3	2	4	3	2	3	2	1	5.7	5.7	5	187.46	1675	1675;1621;1627;1637;1661;1674;1675;290;655;975;1343;1610;1623;1624;1637	1	38	0	7.5608	4	2.3	1.6	516240000	60072000	42987000	16235000	1	1	1	15
F8WF27;F8WBG6;P30408	F8WF27;F8WBG6;P30408	1;1;1	1;1;1	1;1;1	0	143960000	0	Transmembrane 4 L6 family member 1	TM4SF1	;;	3	1	1	1	1	1	1	1	1	1	1	1	1	8.9	8.9	8.9	10.989	101	101;103;202	1	20	0.0031416	2.2895	8.9	8.9	8.9	1169400000	41439000	146940000	101900000	0	1	0	5
F8WJN3;Q16630-3;Q16630;Q16630-2;F8W084	F8WJN3;Q16630-3;Q16630;Q16630-2	14;14;14;14;2	14;14;14;14;2	14;14;14;14;2	494900000	466380000	468770000	Cleavage and polyadenylation specificity factor subunit 6	CPSF6	;;;	5	14	14	14	11	11	10	11	11	10	11	11	10	35.4	35.4	35.4	52.269	478	478;478;551;588;107	1	129	0	188.9	25.3	26.8	23	5724000000	639160000	488380000	474330000	6	6	6	63
G3V0I5;P49821-2;P49821;E9PQP1;B4DE93;E9PMX3;E9PJL9;E9PLC6;E9PPR0;E9PPS5;E9PPD6;H0YD04;H0YE81	G3V0I5;P49821-2;P49821;E9PQP1;B4DE93;E9PMX3	7;7;7;5;5;4;3;3;3;2;1;1;1	7;7;7;5;5;4;3;3;3;2;1;1;1	7;7;7;5;5;4;3;3;3;2;1;1;1	69602000	92091000	63105000	NADH dehydrogenase [ubiquinone] flavoprotein 1, mitochondrial	NDUFV1	;;;;;	13	7	7	7	5	6	6	5	6	6	5	6	6	20.4	20.4	20.4	50.054	457	457;455;464;178;363;178;95;136;144;75;52;127;133	1	55	0	14.941	12.3	18.6	18.6	778820000	79494000	94169000	75476000	3	3	3	18
G3V126;Q9UI12-2;Q9UI12;E5RG49;E5RHH0	G3V126;Q9UI12-2;Q9UI12	8;8;8;2;2	8;8;8;2;2	8;8;8;2;2	134710000	133020000	119270000	V-type proton ATPase subunit H	ATP6V1H	;;	5	8	8	8	4	4	5	4	4	5	4	4	5	28.2	28.2	28.2	51.57	443	443;465;483;101;102	1	66	0	40.63	13.5	13.5	18.1	1449200000	125630000	113160000	140640000	3	2	4	37
G3V159;Q9UPZ3-2;Q9UPZ3	G3V159;Q9UPZ3-2;Q9UPZ3	2;2;2	2;2;2	2;2;2	0	17317000	13122000	Hermansky-Pudlak syndrome 5 protein	HPS5	;;	3	2	2	2	2	2	2	2	2	2	2	2	2	5.2	5.2	5.2	45.163	400	400;1015;1129	1	15	0.00050904	2.8828	5.2	5.2	5.2	90371000	11659000	15895000	12814000	0	1	1	5
G3V1D3;G3V180;Q9NY33-4;Q9NY33;E9PQ14;Q9NY33-2;E9PKK8;E9PPK9;E9PNX5;E9PQF2	G3V1D3;G3V180;Q9NY33-4;Q9NY33	23;23;23;23;9;7;6;6;4;2	23;23;23;23;9;7;6;6;4;2	23;23;23;23;9;7;6;6;4;2	711970000	789110000	831940000	Dipeptidyl peptidase 3	DPP3	;;;	10	23	23	23	20	19	16	20	19	16	20	19	16	42.3	42.3	42.3	84.304	756	756;757;707;737;177;317;170;201;104;90	1	265	0	112.47	36	33.5	30.4	9560600000	799680000	807390000	751140000	8	14	9	154
G3V1K3;J3QT77;Q15165-3;Q15165-1;Q15165;G3XAK4	G3V1K3;J3QT77;Q15165-3;Q15165-1;Q15165;G3XAK4	12;11;11;11;11;7	12;11;11;11;11;7	12;11;11;11;11;7	680560000	777060000	666080000	Serum paraoxonase/arylesterase 2	PON2	;;;;;	6	12	12	12	10	11	10	10	11	10	10	11	10	48.3	48.3	48.3	41.527	375	375;342;342;354;354;219	1	194	0	124.46	43.2	48.3	42.4	9335700000	663060000	703050000	718770000	10	11	9	140
G3V2F7;Q13404-1;Q13404;Q13404-7;Q13404-2;Q13404-8;Q13404-6	G3V2F7;Q13404-1;Q13404;Q13404-7;Q13404-2;Q13404-8;Q13404-6	10;9;8;8;8;6;5	10;9;8;8;8;6;5	3;3;3;3;3;1;3	867290000	937480000	967550000	Ubiquitin-conjugating enzyme E2 variant 1	UBE2V1	;;;;;;	7	10	10	3	5	10	9	5	10	9	1	3	2	31.9	31.9	10	42.208	370	370;221;147;170;170;105;103	1	131	0	27.538	16.2	31.9	27.6	12163000000	861030000	979170000	1001500000	4	7	10	61
G3V3G9;Q5TAQ9;H0YDY4;V9GY54;Q5TAQ9-2	G3V3G9;Q5TAQ9	3;2;1;1;1	2;2;0;1;1	2;2;0;1;1	0	0	42674000	DDB1- and CUL4-associated factor 8	DCAF8	;	5	3	2	2	2	2	3	1	1	2	1	1	2	4.5	3.2	3.2	84.752	751	751;597;119;417;273	1	20	0	5.1434	3.5	3.5	4.5	361940000	23928000	18583000	40141000	1	1	2	14
G3V4F2;Q86TX2;P49753;B3KSA0;P49753-2	G3V4F2;Q86TX2;P49753;B3KSA0;P49753-2	8;8;7;4;4	8;8;7;4;4	8;8;7;4;4	324960000	257040000	188360000	Acyl-coenzyme A thioesterase 1;Acyl-coenzyme A thioesterase 2, mitochondrial	ACOT1;ACOT2	;;;;	5	8	8	8	4	4	6	4	4	6	4	4	6	28.9	28.9	28.9	43.733	395	395;421;483;286;301	1	53	0	23.447	11.9	13.9	21	3660900000	315850000	278530000	316970000	0	1	1	16
G3V4W0;B4DY08;G3V4C1;P07910-2;P07910-4;G3V2D6;P07910-3;G3V5X6;G3V3K6;G3V251;G3V5V7;B4DSU6;G3V4M8;O60812;G3V2H6;E5RG71;B3KT61;Q86SE5;Q86SE5-3	G3V4W0;B4DY08;G3V4C1;P07910-2;P07910-4;G3V2D6;P07910-3;G3V5X6;G3V3K6;G3V251;G3V5V7	12;12;12;12;11;7;7;6;6;6;6;5;4;4;3;1;1;1;1	12;12;12;12;11;7;7;6;6;6;6;5;4;4;3;1;1;1;1	1;1;1;1;1;1;0;1;1;1;0;0;0;0;0;0;0;0;0	713960000	927370000	887050000	Heterogeneous nuclear ribonucleoproteins C1/C2	HNRNPC	;;;;;;;;;;	19	12	12	1	12	10	11	12	10	11	1	1	1	48.5	48.5	6.9	28.916	262	262;288;292;293;250;214;226;117;121;126;180;147;66;293;54;85;280;291;304	1	192	0	55.563	48.5	42.7	45.8	10251000000	703720000	832600000	958040000	9	10	8	111
G3V529;Q9GZR7-2;Q9GZR7;F5GYL3	G3V529;Q9GZR7-2;Q9GZR7;F5GYL3	7;7;7;5	7;7;7;5	7;7;7;5	75993000	75414000	61915000	ATP-dependent RNA helicase DDX24	DDX24	;;;	4	7	7	7	7	5	4	7	5	4	7	5	4	10.7	10.7	10.7	91.48	816	816;804;859;609	1	64	0	10.955	10.7	7.1	6	908250000	101020000	59290000	45284000	4	0	1	17
G3V572;G3V3R9;G3V3Y4;G3V256;Q6PJT7-4;Q6PJT7-3;Q6PJT7-5;Q6PJT7-9;Q6PJT7-2;Q6PJT7;Q6PJT7-11;G3V473;G3V240;Q6PJT7-10;H0YJA2;G3V2X4	G3V572;G3V3R9;G3V3Y4;G3V256;Q6PJT7-4;Q6PJT7-3;Q6PJT7-5;Q6PJT7-9;Q6PJT7-2;Q6PJT7;Q6PJT7-11;G3V473;G3V240;Q6PJT7-10	5;5;5;5;5;5;5;5;5;5;4;3;3;3;2;1	5;5;5;5;5;5;5;5;5;5;4;3;3;3;2;1	5;5;5;5;5;5;5;5;5;5;4;3;3;3;2;1	12130000	0	8033800	Zinc finger CCCH domain-containing protein 14	ZC3H14	;;;;;;;;;;;;;	16	5	5	5	3	3	3	3	3	3	3	3	3	47.7	47.7	47.7	14.68	132	132;209;215;605;571;579;711;730;735;736;585;72;94;543;651;64	1	32	0	6.412	22	34.1	25	286180000	16371000	29752000	19824000	0	0	0	9
G3V599;O15320-9;O15320-8;O15320-6;O15320-7;O15320-2;O15320-4;O15320-3;O15320-10;O15320;O15320-5	G3V599;O15320-9;O15320-8;O15320-6;O15320-7;O15320-2;O15320-4;O15320-3;O15320-10;O15320;O15320-5	3;3;3;3;3;3;3;3;3;3;3	3;3;3;3;3;3;3;3;3;3;3	3;3;3;3;3;3;3;3;3;3;3	37984000	45289000	42820000	cTAGE family member 5	CTAGE5	;;;;;;;;;;	11	3	3	3	2	3	2	2	3	2	2	3	2	4.2	4.2	4.2	151.72	1339	1339;672;724;729;732;761;771;775;792;804;809	1	28	0	4.3604	2.5	4.2	2.5	483330000	39070000	34369000	35770000	1	2	1	8
G3V5T9;P24941-2;P24941;E7ESI2;Q00526;K7EJ83	G3V5T9;P24941-2;P24941;E7ESI2	12;12;12;10;3;2	10;10;10;8;1;1	10;10;10;8;1;1	280730000	227530000	262700000	Cyclin-dependent kinase 2	CDK2	;;;	6	12	10	10	11	11	9	9	9	7	9	9	7	45.7	40.2	40.2	39.178	346	346;264;298;238;305;213	1	112	0	62.867	38.4	42.8	30.9	3135700000	286630000	272090000	210820000	6	4	3	51
G3V5V3;O60524-4;O60524-5;O60524-3;O60524;G3V547;G3V4D9;O60524-2	G3V5V3;O60524-4;O60524-5;O60524-3;O60524	7;7;7;7;7;2;2;1	7;7;7;7;7;2;2;1	7;7;7;7;7;2;2;1	49870000	38560000	46704000	Nuclear export mediator factor NEMF	NEMF	;;;;	8	7	7	7	5	6	2	5	6	2	5	6	2	8.1	8.1	8.1	113.95	998	998;1034;1051;1055;1076;121;178;276	1	56	0	6.6226	6	7.1	2.9	584790000	52861000	37730000	16667000	4	2	1	17
G3V5Z7;P60900;G3V295;P60900-2;G3V3I1;G3V3U4;P60900-3;H0YJC4;G3V4S5;G3V2S7	G3V5Z7;P60900;G3V295;P60900-2;G3V3I1	15;15;13;12;11;7;7;3;2;2	15;15;13;12;11;7;7;3;2;2	15;15;13;12;11;7;7;3;2;2	3077300000	2842500000	2862700000	Proteasome subunit alpha type;Proteasome subunit alpha type-6	PSMA6	;;;;	10	15	15	15	15	14	13	15	14	13	15	14	13	60.7	60.7	60.7	28.147	252	252;246;203;227;148;107;167;85;41;67	1	247	0	246.71	60.7	59.9	60.7	33293000000	3253100000	2614400000	2452000000	16	14	13	180
G3XAB3;Q96AE7	G3XAB3;Q96AE7	3;2	3;2	3;2	19421000	0	0	Tetratricopeptide repeat protein 17	TTC17	;	2	3	3	3	2	2	1	2	2	1	2	2	1	4.5	4.5	4.5	108.61	956	956;1141	1	22	0	4.1513	2.9	2.9	1.4	139360000	13065000	7802500	3335500	2	0	0	4
G3XAI2;P07942;E7EPA6	G3XAI2;P07942;E7EPA6	12;12;6	12;12;6	12;12;6	152850000	163180000	189810000	Laminin subunit beta-1	LAMB1	;;	3	12	12	12	10	10	8	10	10	8	10	10	8	9.3	9.3	9.3	200.48	1810	1810;1786;850	1	111	0	45.082	8.1	7.7	6.8	1912200000	158870000	159420000	148480000	3	5	6	57
G3XAN4;B4E0K2;Q15629	G3XAN4;B4E0K2;Q15629	6;6;6	6;6;6	6;6;6	165750000	211810000	201700000	Translocating chain-associated membrane protein 1	TRAM1	;;	3	6	6	6	6	5	4	6	5	4	6	5	4	25	25	25	33.435	288	288;343;374	1	65	0	33.017	25	22.2	15.3	2145700000	187450000	180080000	223740000	4	4	4	32
G5E994;Q5VW38-2;Q5VW38;U3KQD2;Q5VW38-3	G5E994;Q5VW38-2;Q5VW38;U3KQD2;Q5VW38-3	2;2;2;1;1	2;2;2;1;1	2;2;2;1;1	0	30623000	0	Protein GPR107	GPR107	;;;;	5	2	2	2	1	2	1	1	2	1	1	2	1	3.7	3.7	3.7	63.984	571	571;552;600;128;300	1	18	0	4.7493	1.8	3.7	1.8	221360000	9800800	30408000	6359500	0	2	1	9
G5E9E7;G3V1L9;Q07157-2;Q07157;H0YKB1;H0Y3R8;H0YLT6	G5E9E7;G3V1L9;Q07157-2;Q07157	14;14;14;14;4;1;1	14;14;14;14;4;1;1	14;14;14;14;4;1;1	142290000	147170000	133650000	Tight junction protein ZO-1	TJP1	;;;	7	14	14	14	8	12	9	8	12	9	8	12	9	9.9	9.9	9.9	189.67	1692	1692;1768;1668;1748;383;227;231	1	130	0	17.466	5.4	8.3	5.8	1624900000	91270000	129550000	101340000	5	3	2	45
G5E9I3;F5H7K1;E7EWW0;Q7Z3J2;C9J7I2;Q7Z3J2-2;H3BV68;H3BVG8;H3BUS7;H3BTI5;H3BNX2;F6S1J4	G5E9I3;F5H7K1;E7EWW0;Q7Z3J2;C9J7I2;Q7Z3J2-2;H3BV68	12;12;12;12;10;10;9;5;2;1;1;1	12;12;12;12;10;10;9;5;2;1;1;1	12;12;12;12;10;10;9;5;2;1;1;1	127200000	104040000	98920000	UPF0505 protein C16orf62	C16orf62	;;;;;;	12	12	12	12	10	8	6	10	8	6	10	8	6	18.7	18.7	18.7	98.889	870	870;959;1052;963;813;813;712;453;116;73;170;273	1	102	0	30.074	16.4	11.6	9.2	1474900000	120840000	93966000	63931000	9	0	2	37
G5E9P1;E7EVP7;Q14643-4;Q14643-3;Q14643-8;Q14643-7;Q14643-5;Q14643-6;Q14643-2;Q14643;B7ZMI3	G5E9P1;E7EVP7;Q14643-4;Q14643-3;Q14643-8;Q14643-7;Q14643-5;Q14643-6;Q14643-2;Q14643	8;8;8;8;8;8;8;8;8;8;3	6;6;6;6;6;6;6;6;6;6;2	5;5;5;5;5;5;5;5;5;5;2	23486000	0	0	Inositol 1,4,5-trisphosphate receptor type 1	ITPR1	;;;;;;;;;	11	8	6	5	3	2	2	3	2	2	2	1	1	3.9	3.2	3	308.6	2710	2710;2743;2695;2710;2719;2728;2734;2743;2743;2758;721	1	20	0	4.9033	1.6	0.8	0.9	89298000	23486000	483530	9934600	0	1	0	7
G5E9S8;G3V2E7;F8W6L3;G3V3H3;G3V5R9;E7EVH7;Q07866-8;Q07866-2;Q07866-3;Q07866;Q07866-7;Q07866-5;Q07866-10;Q07866-6;Q07866-4;Q07866-9;G3V2P7;H0YJU9;H0YJL0;H0YJT3;H0YG16;H0YGB8	G5E9S8;G3V2E7;F8W6L3;G3V3H3;G3V5R9;E7EVH7;Q07866-8;Q07866-2;Q07866-3;Q07866;Q07866-7;Q07866-5;Q07866-10;Q07866-6;Q07866-4;Q07866-9	17;17;17;17;17;17;17;17;17;17;17;17;17;17;17;17;7;3;3;3;3;1	17;17;17;17;17;17;17;17;17;17;17;17;17;17;17;17;7;3;3;3;3;1	13;13;13;13;13;13;13;13;13;13;13;13;13;13;13;13;6;3;3;3;3;1	336740000	334550000	305370000	Kinesin light chain 1	KLC1	;;;;;;;;;;;;;;;	22	17	17	13	10	11	9	10	11	9	8	8	7	35	35	25.7	62.506	549	549;551;576;609;630;732;551;560;564;573;584;616;618;628;637;639;150;131;150;161;268;60	1	164	0	41.816	22.6	24.8	19.9	4105700000	323650000	291380000	263170000	10	2	5	73
G5E9W2;Q9P2E5;Q9P2E5-2;C9JZF7	G5E9W2;Q9P2E5;Q9P2E5-2	7;7;4;1	7;7;4;1	7;7;4;1	30535000	39568000	42779000	Chondroitin sulfate glucuronyltransferase	CHPF2	;;	4	7	7	7	4	3	3	4	3	3	4	3	3	11	11	11	85.146	764	764;772;666;90	1	49	0	7.4021	5.6	4.3	4.6	452770000	33318000	27301000	35516000	0	2	1	21
G5E9W7;G5E9V5;P82650;H7C5F2;H7C5H3;Q9H3I1;C9J5D8	G5E9W7;G5E9V5;P82650;H7C5F2;H7C5H3;Q9H3I1	8;8;8;4;4;4;1	8;8;8;4;4;4;1	8;8;8;4;4;4;1	76823000	99455000	75043000	28S ribosomal protein S22, mitochondrial	MRPS22	;;;;;	7	8	8	8	5	4	4	5	4	4	5	4	4	38.6	38.6	38.6	36.805	319	319;359;360;165;200;168;51	1	56	0	21.448	25.1	19.1	21.3	981910000	101130000	60318000	77812000	3	2	1	21
G5EA30;Q92879-5;Q92879-2;Q92879-3;Q92879-6;Q92879;Q92879-4;E9PSH0;E9PQK4;E9PKU1;E9PKA1;F5H4Y5;F5H0D8;B4DIB6;V9GYD9;Q5VZZ6;E9PC62;O95319-5;O95319-2;O95319;O95319-4;O95319-3	G5EA30;Q92879-5;Q92879-2;Q92879-3;Q92879-6;Q92879;Q92879-4	12;12;12;12;12;12;12;5;4;4;2;2;2;1;1;1;1;1;1;1;1;1	12;12;12;12;12;12;12;5;4;4;2;2;2;1;1;1;1;1;1;1;1;1	12;12;12;12;12;12;12;5;4;4;2;2;2;1;1;1;1;1;1;1;1;1	450660000	451080000	510150000	CUGBP Elav-like family member 1	CELF1	;;;;;;	22	12	12	12	10	11	11	10	11	11	10	11	11	23.3	23.3	23.3	55.142	514	514;468;482;483;485;486;512;95;87;114;56;78;103;403;440;502;521;488;490;508;509;521	1	169	0	44.168	20.2	21.4	21.8	5459700000	458660000	427800000	564070000	5	4	8	70
G5EA36;P30260;P30260-2;B4DL80;I3L394;I3L2Z8;I3L328;I3L3H6;F6QPS0	G5EA36;P30260;P30260-2;B4DL80;I3L394	6;6;6;5;3;1;1;1;1	6;6;6;5;3;1;1;1;1	6;6;6;5;3;1;1;1;1	40884000	38793000	30406000	Cell division cycle protein 27 homolog	CDC27	;;;;	9	6	6	6	5	4	4	5	4	4	5	4	4	7.2	7.2	7.2	91.737	823	823;824;830;763;163;86;113;233;343	1	55	0	5.7074	6	4.9	4.9	425290000	49304000	40812000	26641000	3	2	0	18
G5EA48;Q7Z6B7-2;Q7Z6B7	G5EA48;Q7Z6B7-2;Q7Z6B7	3;3;3	2;2;2	2;2;2	0	0	18896000	SLIT-ROBO Rho GTPase-activating protein 1	SRGAP1	;;	3	3	2	2	2	2	3	1	1	2	1	1	2	4.1	2.9	2.9	116.84	1022	1022;1062;1085	1	15	0	9.7786	2.7	2.7	4.1	114800000	5760700	6655500	18481000	0	1	2	8
G5EA52;P30101	G5EA52;P30101	38;38	37;37	31;31	16803000000	16581000000	16326000000	Protein disulfide-isomerase A3	PDIA3	;	2	38	37	31	34	33	33	34	33	33	28	27	27	72.8	72.8	61.9	54.963	485	485;505	1	720	0	323.31	69.7	69.5	68	198340000000	16392000000	15073000000	14445000000	48	48	45	569
G8JLB6;P31943;E9PCY7;D6RBM0;D6RIT2;D6RIU0;D6RAM1;D6R9T0;D6RFM3;E7EN40;D6RDU3;D6RJ04;D6RIH9;H0YB39;E7EQJ0;E5RGV0;H0YBD7;D6RDL0;H0YBG7;D6RF17;E5RGH4;H0YAQ2;F5GZT4;D6R9D3;E5RJ94	G8JLB6;P31943;E9PCY7;D6RBM0;D6RIT2;D6RIU0;D6RAM1;D6R9T0;D6RFM3;E7EN40;D6RDU3;D6RJ04;D6RIH9;H0YB39	20;20;19;13;11;11;10;10;10;10;10;10;10;10;9;9;8;7;5;4;4;4;4;3;2	20;20;19;13;11;11;10;10;10;10;10;10;10;10;9;9;8;7;5;4;4;4;4;3;2	11;11;10;7;8;7;7;7;7;6;7;7;7;4;7;4;3;6;2;4;1;1;2;3;2	4497500000	4464900000	4687800000	Heterogeneous nuclear ribonucleoprotein H;Heterogeneous nuclear ribonucleoprotein H, N-terminally processed	HNRNPH1	;;;;;;;;;;;;;	25	20	20	11	18	20	19	18	20	19	9	11	10	52.8	52.8	32.2	51.229	472	472;449;429;212;164;168;130;161;163;166;171;172;184;277;115;155;194;84;185;49;100;131;159;40;28	1	441	0	323.31	49.8	52.8	50.8	57690000000	4601500000	3944600000	5128300000	28	26	27	333
H0Y4G9;Q99836-5;Q99836;Q99836-6;Q99836-2;Q99836-3;Q99836-4	H0Y4G9;Q99836-5;Q99836;Q99836-6;Q99836-2	8;8;8;8;6;3;2	8;8;8;8;6;3;2	8;8;8;8;6;3;2	95979000	95290000	87194000	Myeloid differentiation primary response protein MyD88	MYD88	;;;;	7	8	8	8	7	5	7	7	5	7	7	5	7	32.3	32.3	32.3	35.312	316	316;275;296;304;251;191;146	1	81	0	16.244	28.2	21.8	28.2	1193700000	113470000	69760000	108010000	1	4	3	31
H0Y4W2;F2Z2U4;Q9Y4A5-2;Q9Y4A5	H0Y4W2;F2Z2U4;Q9Y4A5-2;Q9Y4A5	6;6;6;6	6;6;6;6	6;6;6;6	144130000	0	90040000	Transformation/transcription domain-associated protein	TRRAP	;;;	4	6	6	6	4	3	2	4	3	2	4	3	2	2.3	2.3	2.3	405.8	3588	3588;3848;3830;3859	1	39	0.00027152	3.7585	1.4	1.1	0.6	1227600000	142920000	77713000	43999000	1	0	1	5
H0Y517;H7C1U3;Q5T0F9-3;Q5T0F9-2;Q5T0F9;Q5T0F9-4	H0Y517;H7C1U3;Q5T0F9-3;Q5T0F9-2;Q5T0F9;Q5T0F9-4	5;5;5;5;5;3	5;5;5;5;5;3	5;5;5;5;5;3	0	26390000	55680000	Coiled-coil and C2 domain-containing protein 1B	CC2D1B	;;;;;	6	5	5	5	2	2	2	2	2	2	2	2	2	10.2	10.2	10.2	69.548	628	628;672;532;852;858;214	1	22	0	7.7474	2.9	4.1	4.1	394900000	10577000	20702000	44114000	1	2	0	10
H0Y5H9;P48594;F8W9L1;C9JZ65	H0Y5H9;P48594;F8W9L1	10;10;9;3	3;3;3;1	3;3;3;1	23647000	0	21136000	Serpin B4	SERPINB4;SERPINB3	;;	4	10	3	3	8	6	8	2	1	2	2	1	2	31.8	11.3	11.3	42.388	371	371;390;338;211	1	20	0	31.478	25.1	17.8	25.1	222340000	23223000	8377000	20302000	2	0	0	9
H0Y612;Q9UPN9-2;Q9UPN9;E7EN20	H0Y612;Q9UPN9-2;Q9UPN9	6;6;6;2	6;6;6;2	6;6;6;2	53495000	54268000	55126000	E3 ubiquitin-protein ligase TRIM33	TRIM33	;;	4	6	6	6	4	4	5	4	4	5	4	4	5	7.5	7.5	7.5	98.891	888	888;1110;1127;759	1	42	0	24.059	4.8	4.7	7.4	606590000	61557000	48345000	66694000	2	1	3	16
H0Y621;H7BXI5;H0Y5K5;E9PFA8;Q9Y282-2;Q9Y282;Q9Y282-3;A6PVJ2	H0Y621;H7BXI5;H0Y5K5;E9PFA8;Q9Y282-2;Q9Y282;Q9Y282-3	4;4;4;4;4;4;4;1	4;4;4;4;4;4;4;1	4;4;4;4;4;4;4;1	127660000	0	120230000	Endoplasmic reticulum-Golgi intermediate compartment protein 3	ERGIC3	;;;;;;	8	4	4	4	3	2	2	3	2	2	3	2	2	16	16	16	36.851	326	326;388;397;398;230;383;388;118	1	33	0	9.8414	11.3	7.1	7.1	1249600000	136140000	59250000	82487000	1	0	1	13
H0Y626;O95361;B3KP96;K7ENN8;J3KPT5;O95361-2;J3QKY5;K7EL43;I3L1X9;I3L3K9;I3L2F3;Q309B1;J3QL38	H0Y626;O95361;B3KP96;K7ENN8;J3KPT5;O95361-2	7;7;6;4;4;4;3;3;2;2;2;2;1	7;7;6;4;4;4;3;3;2;2;2;2;1	7;7;6;4;4;4;3;3;2;2;2;2;1	151570000	166890000	190260000	Tripartite motif-containing protein 16	TRIM16	;;;;;	13	7	7	7	6	5	5	6	5	5	6	5	5	9.4	9.4	9.4	107.97	953	953;564;434;232;402;348;115;184;115;224;232;348;96	1	84	0	37.776	9.3	8	7.6	2093900000	160790000	159820000	197770000	4	4	2	31
H0Y6C3;Q53H96;B5MD87;F8WEI0	H0Y6C3;Q53H96;B5MD87	5;5;3;1	5;5;3;1	5;5;3;1	78475000	113470000	74250000	Pyrroline-5-carboxylate reductase 3	PYCRL	;;	4	5	5	5	4	3	3	4	3	3	4	3	3	27.6	27.6	27.6	27.138	261	261;274;137;44	1	50	0	21.457	23.4	18.4	18.4	1033100000	88616000	93889000	83491000	4	1	2	31
H0Y6I0;Q13439-3;Q13439-4;Q13439;Q13439-5;E7EVX2	H0Y6I0;Q13439-3;Q13439-4;Q13439;Q13439-5	4;4;4;4;4;1	4;4;4;4;4;1	4;4;4;4;4;1	33682000	33660000	0	Golgin subfamily A member 4	GOLGA4	;;;;	6	4	4	4	3	3	1	3	3	1	3	3	1	2.5	2.5	2.5	246.6	2099	2099;2223;2228;2230;2243;445	1	30	0	14.702	1.5	2	1	321190000	32513000	37713000	18149000	2	1	0	13
H0Y7A7;P62158;E7ETZ0;E7EMB3;M0QZ52;Q96HY3;F8WBR5;G3V479;G3V361;G3V226;P27482;C9J7T9;P02585	H0Y7A7;P62158;E7ETZ0;E7EMB3;M0QZ52;Q96HY3	11;11;10;10;6;6;5;5;5;3;2;1;1	11;11;10;10;6;6;5;5;5;3;2;1;1	11;11;10;10;6;6;5;5;5;3;2;1;1	6814700000	6705700000	6395900000	Calmodulin	CALM2;CALM1;CALM3	;;;;;	13	11	11	11	11	11	11	11	11	11	11	11	11	48.1	48.1	48.1	20.762	187	187;149;150;196;83;113;65;83;98;76;149;145;160	1	246	0	323.31	48.1	48.1	48.1	81621000000	6727000000	6171100000	6456900000	13	15	13	162
H0Y818;P40692;P40692-2;P40692-3;H0Y806;B7Z821	H0Y818;P40692;P40692-2;P40692-3	4;4;2;2;1;1	4;4;2;2;1;1	4;4;2;2;1;1	26794000	28728000	0	DNA mismatch repair protein Mlh1	MLH1	;;;	6	4	4	4	3	3	1	3	3	1	3	3	1	10.6	10.6	10.6	75.747	679	679;756;515;658;114;460	1	24	0	23.481	8	8.8	2.7	267920000	24521000	39287000	9235100	5	2	0	17
H0Y8C3;Q9NZJ7-2;Q9NZJ7;Q5TDC2;B4E0C5;Q9NZJ7-3	H0Y8C3;Q9NZJ7-2;Q9NZJ7;Q5TDC2	7;7;7;5;3;2	7;7;7;5;3;2	7;7;7;5;3;2	207130000	185450000	230590000	Mitochondrial carrier homolog 1	MTCH1	;;;	6	7	7	7	7	7	7	7	7	7	7	7	7	21.3	21.3	21.3	43.121	394	394;372;389;357;254;171	1	110	0	16.103	21.3	21.3	21.3	2683700000	264450000	201940000	254930000	4	3	2	48
H0Y8L3;G8JLA8;Q15582;H0YAB8;H0Y9D7;S4R3C6	H0Y8L3;G8JLA8;Q15582	3;3;3;1;1;1	3;3;3;1;1;1	3;3;3;1;1;1	21635000	22973000	0	Transforming growth factor-beta-induced protein ig-h3	TGFBI	;;	6	3	3	3	2	3	1	2	3	1	2	3	1	12.3	12.3	12.3	39.793	366	366;683;683;59;194;219	1	24	0	5.8716	7.4	12.3	3.3	214280000	19974000	26455000	7434200	2	1	0	12
H0Y8X4;O43598;O43598-2	H0Y8X4;O43598;O43598-2	6;6;3	6;6;3	6;6;3	127760000	167330000	201430000	2-deoxynucleoside 5-phosphate N-hydrolase 1	DNPH1	;;	3	6	6	6	5	4	4	5	4	4	5	4	4	28	28	28	25.868	243	243;174;148	1	58	0	35.989	27.6	24.3	20.6	2037900000	132360000	229780000	293110000	3	2	3	27
H0Y9G6;E7ETU7;P09001;D6RC14;E9PF06;D6RBQ5	H0Y9G6;E7ETU7;P09001;D6RC14;E9PF06	5;5;5;4;4;1	5;5;5;4;4;1	5;5;5;4;4;1	77880000	0	86097000	39S ribosomal protein L3, mitochondrial	MRPL3	;;;;	6	5	5	5	5	3	3	5	3	3	5	3	3	17.4	17.4	17.4	40.47	363	363;375;348;155;176;28	1	47	0	9.2565	17.4	7.2	7.2	882430000	93673000	46265000	47990000	3	0	1	21
H0Y9V7;P98194-2;P98194-4;P98194;P98194-3;P98194-5;P98194-9;P98194-6;P98194-7;E7ERC6;P98194-8;H0Y8X9;D6RGE9;D6REJ1;D6RHV9;H0Y9S7	H0Y9V7;P98194-2;P98194-4;P98194;P98194-3;P98194-5;P98194-9;P98194-6;P98194-7;E7ERC6;P98194-8	7;7;7;7;7;7;7;7;7;6;6;3;1;1;1;1	7;7;7;7;7;7;7;7;7;6;6;3;1;1;1;1	7;7;7;7;7;7;7;7;7;6;6;3;1;1;1;1	23094000	0	0	Calcium-transporting ATPase type 2C member 1	ATP2C1	;;;;;;;;;;	16	7	7	7	5	2	2	5	2	2	5	2	2	11.1	11.1	11.1	98.938	903	903;888;903;919;923;939;949;959;973;894;944;215;82;102;120;314	1	31	0	10.294	7.6	2.9	2.8	291240000	35900000	16503000	28535000	1	1	0	10
H0YAN8;O15013-7;O15013-4;O15013-5;O15013;O15013-6;E9PB39;B4DTE2;Q5VXI4;Q9HCE6-5;Q9HCE6-3;Q9HCE6-2;Q9HCE6	H0YAN8;O15013-7;O15013-4;O15013-5;O15013;O15013-6;E9PB39	4;4;4;4;4;3;2;1;1;1;1;1;1	4;4;4;4;4;3;2;1;1;1;1;1;1	4;4;4;4;4;3;2;1;1;1;1;1;1	20790000	20953000	24142000	Rho guanine nucleotide exchange factor 10	ARHGEF10	;;;;;;	13	4	4	4	3	2	3	3	2	3	3	2	3	4.1	4.1	4.1	109.65	988	988;1306;1340;1344;1369;1368;610;488;1052;1067;1235;1240;1279	1	32	0	3.8086	2.4	1.5	2.4	231650000	23400000	15895000	23499000	1	1	2	11
H0YAZ3;O60504-2;O60504;H0YB51;E5RHI2;H0YBA2	H0YAZ3;O60504-2;O60504;H0YB51;E5RHI2;H0YBA2	2;2;2;1;1;1	2;2;2;1;1;1	2;2;2;1;1;1	0	26631000	0	Vinexin	SORBS3	;;;;;	6	2	2	2	2	2	2	2	2	2	2	2	2	17.7	17.7	17.7	20.442	186	186;329;671;226;260;286	1	19	0.000762	2.8582	17.7	17.7	17.7	244940000	30588000	24266000	22558000	0	1	0	3
H0YB13;O76061;E5RG57	H0YB13;O76061	3;3;1	3;3;1	3;3;1	57400000	77479000	65968000	Stanniocalcin-2	STC2	;	3	3	3	3	3	3	3	3	3	3	3	3	3	23.6	23.6	23.6	13.775	123	123;302;53	1	35	0	4.3019	23.6	23.6	23.6	763230000	55426000	78047000	65289000	1	2	2	18
H0YD13;E7EPC6;P16070-18;P16070-12;P16070-14;P16070-13;P16070-11;P16070-10;P16070-16;P16070-8;P16070-17;P16070-6;P16070-4;P16070-3;P16070-7;P16070-5;P16070;H0Y2P0;H0YE40;H0YDW7;H0YCV9;H0Y5E4;P16070-15;P16070-9;E9PKC6;H0YDX6;J3KN83;Q86UZ1;H0YD17;P16070-19	H0YD13;E7EPC6;P16070-18;P16070-12;P16070-14;P16070-13;P16070-11;P16070-10;P16070-16;P16070-8;P16070-17;P16070-6;P16070-4;P16070-3;P16070-7;P16070-5;P16070;H0Y2P0;H0YE40	10;10;10;10;10;10;10;10;10;10;10;10;10;10;10;10;10;9;6;4;4;4;4;4;3;3;3;2;2;2	10;10;10;10;10;10;10;10;10;10;10;10;10;10;10;10;10;9;6;4;4;4;4;4;3;3;3;2;2;2	10;10;10;10;10;10;10;10;10;10;10;10;10;10;10;10;10;9;6;4;4;4;4;4;3;3;3;2;2;2	5307800000	4978400000	4391500000	CD44 antigen	CD44	;;;;;;;;;;;;;;;;;;	30	10	10	10	9	9	10	9	9	10	9	9	10	47.6	47.6	47.6	22.683	206	206;714;340;361;396;425;429;493;668;674;691;699;699;711;713;734;742;287;82;240;249;294;294;675;78;181;232;80;229;139	1	215	0	62.169	42.7	42.7	47.6	60373000000	4508300000	4456000000	5104100000	12	9	9	136
H0YDJ3;F5H2U2;Q13523	H0YDJ3;F5H2U2;Q13523	4;4;4	4;4;4	4;4;4	34907000	35616000	32084000	Serine/threonine-protein kinase PRP4 homolog	PRPF4B	;;	3	4	4	4	3	3	4	3	3	4	3	3	4	9	9	9	68.4	587	587;993;1007	1	38	0	7.845	7.2	7.2	9	403270000	35534000	33766000	43334000	1	1	1	15
H0YDK8;E7EWT3;Q5T1Z4;Q5T1Z8;Q14671-2;Q14671-3;H0YC97;H0YDC5	H0YDK8;E7EWT3;Q5T1Z4;Q5T1Z8;Q14671-2;Q14671-3	7;7;7;7;7;7;3;1	7;7;7;7;7;7;3;1	1;1;1;1;1;1;1;0	81174000	98089000	0	Pumilio homolog 1	PUM1	;;;;;	8	7	7	1	6	3	4	6	3	4	1	0	0	11.2	11.2	1.9	95.696	900	900;1044;1189;1224;1162;1188;227;217	1	55	0	10.759	10	3.3	4.6	1069200000	96372000	61477000	94688000	2	1	0	16
H0YDR3;Q8N5M4;E9PKV8	H0YDR3;Q8N5M4;E9PKV8	3;3;2	3;3;2	3;3;2	157830000	130100000	140570000	Tetratricopeptide repeat protein 9C	TTC9C	;;	3	3	3	3	3	3	3	3	3	3	3	3	3	55.1	55.1	55.1	8.1571	69	69;171;140	1	49	0	24.709	55.1	55.1	55.1	1887800000	145370000	156310000	167790000	3	3	3	32
H0YDU8;P53041;A8MU39;M0R196;E7EU14	H0YDU8;P53041;A8MU39	20;20;13;1;1	20;20;13;1;1	20;20;13;1;1	1175600000	1237200000	1351300000	Serine/threonine-protein phosphatase;Serine/threonine-protein phosphatase 5	PPP5C	;;	5	20	20	20	17	17	18	17	17	18	17	17	18	49.1	49.1	49.1	55.096	485	485;499;371;125;171	1	316	0	164.09	43.3	42.7	45.2	15296000000	1086300000	1120700000	1560300000	9	17	17	174
H0YEB6;O60232;G3V1B8;H0YEK1;E9PN57;E9PK41	H0YEB6;O60232;G3V1B8	6;6;5;2;1;1	6;6;5;2;1;1	6;6;5;2;1;1	183300000	230510000	219280000	Sjoegren syndrome/scleroderma autoantigen 1	SSSCA1	;;	6	6	6	6	6	6	6	6	6	6	6	6	6	61.1	61.1	61.1	20.916	193	193;199;162;107;60;81	1	77	0	17.05	61.1	61.1	61.1	2670900000	222300000	260060000	177190000	5	2	5	45
H0YEF3;E9PN81;Q8TDP1-2;Q8TDP1;H0YE52;H0YCP5;E9PKP0	H0YEF3;E9PN81;Q8TDP1-2;Q8TDP1;H0YE52;H0YCP5;E9PKP0	4;4;4;4;3;3;2	4;4;4;4;3;3;2	4;4;4;4;3;3;2	32529000	0	0	Ribonuclease H2 subunit C	RNASEH2C	;;;;;;	7	4	4	4	4	2	2	4	2	2	4	2	2	43.7	43.7	43.7	17.12	158	158;247;163;164;124;129;81	1	28	0	9.1203	43.7	15.8	24.7	389150000	45581000	21286000	39278000	2	0	0	6
H0YFA4;P52943;P52943-2;H0YHD8	H0YFA4;P52943;P52943-2	3;3;3;1	3;3;3;1	3;3;3;1	178280000	139940000	154310000	Cysteine-rich protein 2	CRIP2	;;	4	3	3	3	3	2	2	3	2	2	3	2	2	34.9	34.9	34.9	20.6	192	192;208;282;104	1	41	0	17.189	34.9	26.6	26.6	1842700000	181110000	123620000	151640000	2	1	0	15
H0YH87;F8WB06;F8VQP2;V9GY86;Q99700-2;Q99700-4;Q99700;Q24JQ7;F8VVY6;F8VRK6;F8W0B5	H0YH87;F8WB06;F8VQP2;V9GY86;Q99700-2;Q99700-4;Q99700;Q24JQ7	6;6;6;6;6;6;6;5;1;1;1	5;5;5;5;5;5;5;4;1;1;1	5;5;5;5;5;5;5;4;1;1;1	43627000	38286000	43431000	Ataxin-2	ATXN2	;;;;;;;	11	6	5	5	5	4	4	4	3	3	4	3	3	8.2	7.3	7.3	98.004	916	916;1050;1073;1153;995;1243;1313;1006;184;235;285	1	43	0	6.2648	6.3	4.5	5.1	518540000	42285000	32256000	42478000	0	1	1	16
H0YJ47;O75843	H0YJ47;O75843	1;1	1;1	1;1	0	0	36331000	AP-1 complex subunit gamma-like 2	AP1G2	;	2	1	1	1	1	1	1	1	1	1	1	1	1	4.6	4.6	4.6	20.96	197	197;785	1	21	0.0093501	1.7	4.6	4.6	4.6	419940000	35844000	6326000	37118000	0	0	1	3
H0YJ75;Q13362-2;Q13362-3;Q13362;Q13362-4;Q13362-5;Q96B13;H0YN84;H0YJ49;H0YJU0;G3V2U3	H0YJ75;Q13362-2;Q13362-3;Q13362;Q13362-4;Q13362-5;Q96B13	9;9;9;9;9;9;7;4;2;2;2	4;4;4;4;4;4;3;2;1;1;1	4;4;4;4;4;4;3;2;1;1;1	56070000	61521000	51359000	Serine/threonine-protein phosphatase 2A 56 kDa regulatory subunit gamma isoform	PPP2R5C	;;;;;;	11	9	4	4	7	8	9	3	4	4	3	4	4	20.6	7.6	7.6	64.063	553	553;449;485;524;540;555;384;89;151;153;216	1	45	0	4.6875	15.9	17.2	20.6	691140000	45056000	64272000	52272000	0	0	1	9
H0YJE5;Q13572-2;Q13572;G3V588;G3V3C0;G3V5A3;G3V4M9	H0YJE5;Q13572-2;Q13572;G3V588;G3V3C0;G3V5A3;G3V4M9	2;2;2;1;1;1;1	2;2;2;1;1;1;1	2;2;2;1;1;1;1	25186000	0	0	Inositol-tetrakisphosphate 1-kinase	ITPK1	;;;;;;	7	2	2	2	2	1	0	2	1	0	2	1	0	14.8	14.8	14.8	26.359	230	230;314;414;168;181;206;295	1	12	0.00050878	2.8795	14.8	5.7	0	139630000	23752000	7475400	0	0	0	0	3
H0YKH1;F8WA05;H0YLF5;P40424-2;P40424-3;P40424;H0YLM3;H0YLD4;H0YLT4;B7Z774;H0YLB0	H0YKH1;F8WA05;H0YLF5;P40424-2;P40424-3;P40424;H0YLM3;H0YLD4;H0YLT4;B7Z774;H0YLB0	2;2;2;2;2;2;1;1;1;1;1	2;2;2;2;2;2;1;1;1;1;1	2;2;2;2;2;2;1;1;1;1;1	0	0	19642000	Pre-B-cell leukemia transcription factor 1	PBX1	;;;;;;;;;;	11	2	2	2	1	2	2	1	2	2	1	2	2	27	27	27	17.635	159	159;170;339;347;420;430;97;128;138;301;325	1	11	0.00075969	2.8156	8.8	27	27	104510000	7049800	20864000	19198000	1	1	1	6
H0YM21;H0YMJ0;H0YLJ3;B3KTM8;Q9UBU8-3;Q9UBU8-2;Q9UBU8;H0YLV1;H0YMT8;H0YNE0;H0YNX3	H0YM21;H0YMJ0;H0YLJ3;B3KTM8;Q9UBU8-3;Q9UBU8-2;Q9UBU8;H0YLV1;H0YMT8;H0YNE0	3;3;3;3;3;3;3;2;2;2;1	2;2;2;2;2;2;2;2;2;2;1	2;2;2;2;2;2;2;2;2;2;1	14972000	0	0	Mortality factor 4-like protein 1	MORF4L1	;;;;;;;;;	11	3	2	2	2	2	2	2	1	1	2	1	1	28.2	20.5	20.5	17.894	156	156;245;269;348;235;323;362;113;118;213;74	1	11	0.00050942	2.8857	20.5	16.7	16.7	86525000	14662000	9380400	10544000	1	0	1	4
H0YM23;O75179-6;O75179-7;O75179-2;O75179;H0YLQ3;O75179-5;O75179-3;O75179-4;H0YMS3	H0YM23;O75179-6;O75179-7;O75179-2;O75179;H0YLQ3;O75179-5;O75179-3;O75179-4	10;10;10;10;10;5;5;5;5;4	3;3;3;3;3;2;1;1;1;1	3;3;3;3;3;2;1;1;1;1	23074000	0	0	Ankyrin repeat domain-containing protein 17	ANKRD17	;;;;;;;;	10	10	3	3	7	6	5	2	1	1	2	1	1	5.6	1.4	1.4	263.25	2487	2487;2352;2490;2602;2603;862;751;1187;2010;828	1	23	0	5.5601	4.1	3.8	3	226730000	18402000	9126200	8951200	0	0	1	11
H0YMB0;Q00978;H0YNP4	H0YMB0;Q00978	3;3;1	3;3;1	3;3;1	0	41496000	39377000	Interferon regulatory factor 9	IRF9	;	3	3	3	3	2	2	2	2	2	2	2	2	2	8.8	8.8	8.8	38.276	353	353;393;267	1	23	0	5.7046	6.2	6.2	6.2	397130000	41077000	35097000	33927000	0	1	1	6
H0YMB3;H0YLV5;Q6PKC0;H0YNJ6;Q9P2T1;Q9P2T1-2;H0YL68;H0YKE1;H0YNS9;H0YMR9;H0YMV5;H0YLB8;H0YNH0;Q9P2T1-3	H0YMB3;H0YLV5;Q6PKC0;H0YNJ6;Q9P2T1;Q9P2T1-2;H0YL68;H0YKE1;H0YNS9;H0YMR9;H0YMV5;H0YLB8;H0YNH0;Q9P2T1-3	2;2;2;2;2;2;1;1;1;1;1;1;1;1	2;2;2;2;2;2;1;1;1;1;1;1;1;1	2;2;2;2;2;2;1;1;1;1;1;1;1;1	15056000	0	0	GMP reductase;GMP reductase 2	GMPR2	;;;;;;;;;;;;;	14	2	2	2	2	0	2	2	0	2	2	0	2	8.3	8.3	8.3	33.921	315	315;333;409;427;348;366;57;64;125;131;151;169;239;320	1	16	0.0002586	3.1119	8.3	0	8.3	127110000	15040000	0	1961100	0	0	1	7
H0YMV8;Q71UM5;C9JLI6	H0YMV8;Q71UM5;C9JLI6	3;3;2	1;1;1	1;1;1	134590000	115090000	0	40S ribosomal protein S27;40S ribosomal protein S27-like	RPS27L	;;	3	3	1	1	3	3	3	1	1	1	1	1	1	32	11	11	11.345	100	100;84;97	1	23	0	33.624	32	32	32	1462600000	139090000	104750000	65483000	0	0	0	12
H0YNG3;P67812-4;P67812;P67812-3;H0YNX5;P67812-2;H0YKT4;H0YNA5;P0C7V7	H0YNG3;P67812-4;P67812;P67812-3;H0YNX5;P67812-2;H0YKT4;H0YNA5	6;6;6;6;4;4;3;3;1	6;6;6;6;4;4;3;3;1	6;6;6;6;4;4;3;3;1	458530000	458220000	444260000	Signal peptidase complex catalytic subunit SEC11;Signal peptidase complex catalytic subunit SEC11A;Signal peptidase I	SEC11A	;;;;;;;	9	6	6	6	6	6	5	6	6	5	6	6	5	27.6	27.6	27.6	18.651	163	163;164;179;185;106;153;129;135;166	1	77	0	11.975	27.6	27.6	27	5579100000	469610000	430150000	429670000	2	4	2	35
H0YNW5;P33316-2;P33316;H0YKC5;H0YMM5;H0YNJ9;H0YKI0;H0YMP1	H0YNW5;P33316-2;P33316;H0YKC5;H0YMM5;H0YNJ9;H0YKI0	9;9;9;8;6;6;6;3	9;9;9;8;6;6;6;3	9;9;9;8;6;6;6;3	1033900000	908000000	978930000	Deoxyuridine 5-triphosphate nucleotidohydrolase, mitochondrial	DUT	;;;;;;	8	9	9	9	8	8	8	8	8	8	8	8	8	61.7	61.7	61.7	17.827	167	167;164;252;221;133;143;226;107	1	156	0	119.02	60.5	60.5	61.7	11143000000	967080000	834400000	1013300000	7	9	8	98
H3BLU7;O43488;H7C5H7;Q8NHP1	H3BLU7;O43488	8;8;1;1	8;8;1;1	8;8;1;1	285340000	222150000	184480000	Aflatoxin B1 aldehyde reductase member 2	AKR7A2	;	4	8	8	8	6	7	5	6	7	5	6	7	5	45.2	45.2	45.2	34.684	314	314;359;205;331	1	109	0	54.383	35.7	34.7	27.7	3450200000	214470000	308420000	120320000	4	2	2	56
H3BLV9;B4DS61;Q96SB4;Q96SB4-3;Q5R363;A8MPP7;A8MPY5;E7ETV6;Q9UPE1-2;Q9UPE1-3;Q9UPE1-4;Q9UPE1;H7C2I2	H3BLV9;B4DS61;Q96SB4;Q96SB4-3;Q5R363	12;12;12;12;9;2;2;2;2;2;2;2;1	12;12;12;12;9;2;2;2;2;2;2;2;1	9;9;9;9;8;0;0;0;0;0;0;0;0	172170000	166640000	181360000	SRSF protein kinase 1	SRPK1	;;;;	13	12	12	9	7	9	8	7	9	8	7	8	6	22.8	22.8	17.6	76.039	671	671;639;655;826;547;492;534;634;491;533;566;567;129	1	106	0	32.499	13.6	17	15.1	2032600000	166850000	166790000	207720000	3	5	2	46
H3BLZ8;Q92841;Q92841-1;Q92841-3;C9JMU5;Q92841-2;G5E9L5	H3BLZ8;Q92841;Q92841-1;Q92841-3;C9JMU5;Q92841-2	28;28;27;27;26;26;2	19;19;18;18;18;18;2	19;19;18;18;18;18;2	1586800000	1529600000	1478200000	Probable ATP-dependent RNA helicase DDX17	DDX17	;;;;;	7	28	19	19	26	27	26	18	18	18	18	18	18	42	30.2	30.2	80.439	731	731;729;650;652;652;652;181	1	315	0	199.61	39.1	40.2	39.1	19551000000	1466700000	1579400000	1742500000	17	10	14	166
H3BM14;H3BM74;Q9Y5A7-2;Q9Y5A7;H7C5N1;H7C5E1;C9J7X7;C9JRT6;F8WDB6	H3BM14;H3BM74;Q9Y5A7-2;Q9Y5A7;H7C5N1	4;4;4;4;2;1;1;1;1	4;4;4;4;2;1;1;1;1	4;4;4;4;2;1;1;1;1	38428000	35153000	36827000	NEDD8 ultimate buster 1	NUB1	;;;;	9	4	4	4	3	3	2	3	3	2	3	3	2	7.7	7.7	7.7	71.921	625	625;639;601;615;202;128;154;254;267	1	34	0	6.5572	5.6	5.6	3.8	422810000	35682000	33575000	26761000	2	0	1	7
H3BM67;H3BUP2;H3BUN4;O60936-2;O60936-3;O60936;J3QLT7;H3BQJ5	H3BM67;H3BUP2;H3BUN4;O60936-2;O60936-3;O60936	5;5;5;5;5;3;1;1	5;5;5;5;5;3;1;1	5;5;5;5;5;3;1;1	75529000	82635000	67163000	Nucleolar protein 3	NOL3	;;;;;	8	5	5	5	4	4	3	4	4	3	4	4	3	59.4	59.4	59.4	14.924	138	138;174;206;208;270;219;131;216	1	52	0	20.189	40.6	40.6	26.8	1003400000	74816000	72042000	61776000	1	3	2	30
H3BMF4;Q9H2V7-3;Q9H2V7-2;Q9H2V7;Q9H2V7-4;H3BR82;H3BPT8;H3BPQ9;Q9H2V7-5;H3BT44	H3BMF4;Q9H2V7-3;Q9H2V7-2;Q9H2V7;Q9H2V7-4;H3BR82	5;5;5;5;4;3;2;2;2;1	5;5;5;5;4;3;2;2;2;1	5;5;5;5;4;3;2;2;2;1	104470000	124510000	116700000	Protein spinster homolog 1	SPNS1	;;;;;	10	5	5	5	5	3	4	5	3	4	5	3	4	11.9	11.9	11.9	61.105	573	573;454;476;528;455;538;179;274;229;178	1	70	0	27.653	11.9	7	9.9	1507300000	129110000	76895000	118050000	2	2	3	39
H3BMQ0;P49815-6;P49815-5;P49815-3;P49815-2;P49815-4;P49815;P49815-7;H3BQK4;Q5HYF7	H3BMQ0;P49815-6;P49815-5;P49815-3;P49815-2;P49815-4;P49815;P49815-7;H3BQK4	6;6;6;6;6;6;6;5;3;1	6;6;6;6;6;6;6;5;3;1	6;6;6;6;6;6;6;5;3;1	23623000	29533000	21849000	Tuberin	TSC2	;;;;;;;;	10	6	6	6	4	2	3	4	2	3	4	2	3	4.7	4.7	4.7	194.39	1751	1751;1704;1740;1763;1764;1784;1807;1692;535;108	1	28	0	5.9335	3.3	2	3	213870000	25933000	21011000	24881000	2	1	2	10
H3BNT2;O75208;H3BPY0;H3BPC6;H3BSJ5;H3BPW3;H3BVA5;H3BRC0;O75208-2	H3BNT2;O75208;H3BPY0;H3BPC6;H3BSJ5	3;3;2;2;2;1;1;1;1	3;3;2;2;2;1;1;1;1	3;3;2;2;2;1;1;1;1	28041000	24868000	25177000	Ubiquinone biosynthesis protein COQ9, mitochondrial	COQ9	;;;;	9	3	3	3	2	2	3	2	2	3	2	2	3	15.8	15.8	15.8	33.886	303	303;318;89;188;283;102;172;207;135	1	29	0	4.377	8.9	12.2	15.8	301110000	20736000	20108000	32702000	1	1	1	14
H3BNX8;P20674;H3BRM5;H3BV69;H3BRI0	H3BNX8;P20674;H3BRM5;H3BV69	5;5;3;3;1	5;5;3;3;1	5;5;3;3;1	875250000	882240000	1058400000	Cytochrome c oxidase subunit 5A, mitochondrial	COX5A	;;;	5	5	5	5	5	4	5	5	4	5	5	4	5	31.4	31.4	31.4	17.235	153	153;150;69;111;84	1	104	0	8.8711	31.4	30.7	31.4	11223000000	919360000	942040000	1001000000	1	4	4	35
H3BP20;P06865;H3BS10;E9PGL4;H3BU85;H3BTD4;B4DKE7	H3BP20;P06865;H3BS10;E9PGL4;H3BU85;H3BTD4	10;10;9;6;5;5;3	10;10;9;6;5;5;3	10;10;9;6;5;5;3	222390000	216930000	201050000	Beta-hexosaminidase;Beta-hexosaminidase subunit alpha	HEXA	;;;;;	7	10	10	10	8	9	9	8	9	9	8	9	9	20.6	20.6	20.6	61.999	540	540;529;509;301;318;373;168	1	99	0	22.726	17.4	16.9	18.5	2680100000	218090000	230380000	237130000	3	4	4	44
H3BP71;O75150;O75150-4;F8W8Z4;O75150-3;H3BQ99;H3BUL6;I3L332;H3BS50	H3BP71;O75150;O75150-4;F8W8Z4;O75150-3	12;12;11;9;8;2;2;2;2	12;12;11;9;8;2;2;2;2	11;11;10;8;7;2;2;2;2	159740000	164180000	135710000	E3 ubiquitin-protein ligase BRE1B	RNF40	;;;;	9	12	12	11	10	8	6	10	8	6	9	7	5	15.6	15.6	14.2	109.02	961	961;1001;901;693;838;111;129;144;174	1	103	0	20.836	13.3	9.8	7.2	1885400000	191780000	141270000	90772000	3	3	3	35
H3BPJ9;O96000;H3BV16;Q96II6	H3BPJ9;O96000;H3BV16;Q96II6	5;5;4;4	5;5;4;4	5;5;4;4	254090000	267400000	275130000	NADH dehydrogenase [ubiquinone] 1 beta subcomplex subunit 10	NDUFB10	;;;	4	5	5	5	4	5	4	4	5	4	4	5	4	38.5	38.5	38.5	19.258	161	161;172;142;168	1	73	0	25.656	29.8	38.5	29.8	3334700000	250750000	240770000	245490000	4	2	3	47
H3BPM8;Q2TA70;B4DFF3;Q13286-4;Q13286-2;B4DXL3;Q13286-3;Q13286;O95090;Q9UBD8;H3BQ48;B4DMY6;Q13286-5;Q13286-6	H3BPM8;Q2TA70;B4DFF3;Q13286-4;Q13286-2;B4DXL3;Q13286-3;Q13286;O95090;Q9UBD8;H3BQ48;B4DMY6;Q13286-5;Q13286-6	2;2;2;2;2;2;2;2;1;1;1;1;1;1	2;2;2;2;2;2;2;2;1;1;1;1;1;1	2;2;2;2;2;2;2;2;1;1;1;1;1;1	68848000	96042000	76625000	Battenin	CLN3	;;;;;;;;;;;;;	14	2	2	2	2	2	2	2	2	2	2	2	2	9.4	9.4	9.4	36.272	341	341;360;384;321;390;414;421;438;167;181;184;338;253;339	1	36	0	4.692	9.4	9.4	9.4	996610000	67530000	91327000	79572000	1	1	1	10
H3BQQ2;Q86UK7-2;Q86UK7-3;Q86UK7	H3BQQ2;Q86UK7-2;Q86UK7-3;Q86UK7	3;3;3;3	3;3;3;3	3;3;3;3	33449000	32032000	27143000	Zinc finger protein 598	ZNF598	;;;	4	3	3	3	3	3	2	3	3	2	3	3	2	4.5	4.5	4.5	93.287	849	849;896;898;904	1	31	0	5.7285	4.5	4.5	3.1	348260000	36892000	29184000	16537000	3	1	1	13
H3BQZ7;Q1KMD3	H3BQZ7;Q1KMD3	14;14	14;14	14;14	254880000	225990000	228220000	Heterogeneous nuclear ribonucleoprotein U-like protein 2	HNRNPUL2-BSCL2;HNRNPUL2	;	2	14	14	14	8	9	12	8	9	12	8	9	12	26.8	26.8	26.8	84.69	746	746;747	1	116	0	75.074	15.3	18.8	23.7	2893300000	199090000	218650000	320350000	4	3	6	48
H3BR94;Q9BTE1-2;Q9BTE1;H3BUD2;H3BS05;Q9BTE1-3	H3BR94;Q9BTE1-2;Q9BTE1;H3BUD2;H3BS05;Q9BTE1-3	3;3;3;2;2;2	3;3;3;2;2;2	3;3;3;2;2;2	79203000	0	74121000	Dynactin subunit 5	DCTN5	;;;;;	6	3	3	3	3	2	3	3	2	3	3	2	3	20	20	20	16.91	155	155;152;182;53;75;84	1	33	0	4.1896	20	13.5	20	775090000	82516000	33587000	68588000	1	0	1	8
H3BRL3;O14562;H3BUM8	H3BRL3;O14562	3;3;1	3;3;1	3;3;1	43486000	62708000	70052000	Ubiquitin domain-containing protein UBFD1	UBFD1	;	3	3	3	3	3	2	3	3	2	3	3	2	3	13.7	13.7	13.7	32.64	300	300;309;190	1	37	0	15.67	13.7	9.7	13.7	733480000	62311000	39390000	90095000	2	1	4	23
H3BSM5;P60520;H3BU36;H3BQ50;F5GZY7;Q9H0R8;Q9H0R8-2	H3BSM5;P60520	3;3;1;1;1;1;1	3;3;1;1;1;1;1	2;2;1;1;0;0;0	249190000	201260000	207160000	Gamma-aminobutyric acid receptor-associated protein-like 2	GABARAPL2	;	7	3	3	2	3	3	3	3	3	3	2	2	2	26.1	26.1	18.2	10.401	88	88;117;42;57;70;117;146	1	39	0.004496	2.0566	26.1	26.1	26.1	2591300000	236970000	198980000	205210000	1	1	1	17
H3BT71;P38159;H3BR27;H0Y6E7;P38159-2;H3BNC1;Q96E39;O75526;Q8N7X1	H3BT71;P38159;H3BR27;H0Y6E7;P38159-2;H3BNC1;Q96E39;O75526	6;6;5;5;5;3;3;3;1	6;6;5;5;5;3;3;3;1	1;1;0;1;1;0;0;0;0	268960000	288140000	269120000	RNA-binding motif protein, X chromosome;RNA-binding motif protein, X chromosome, N-terminally processed;RNA binding motif protein, X-linked-like-1;RNA-binding motif protein, X-linked-like-2	RBMX;RBMXL1;RBMXL2	;;;;;;;	9	6	6	1	5	5	5	5	5	5	1	1	1	21.6	21.6	4.4	32.197	296	296;391;78;292;378;37;390;392;1067	1	97	0	20.585	18.9	18.9	18.9	3547000000	257010000	271800000	256110000	4	4	4	49
H3BTL1;Q9GZQ8;A6NCE7;Q9H492;Q9H492-2	H3BTL1;Q9GZQ8;A6NCE7;Q9H492;Q9H492-2	2;2;2;1;1	2;2;2;1;1	2;2;2;1;1	271690000	319550000	303860000	Microtubule-associated proteins 1A/1B light chain 3B;Microtubule-associated proteins 1A/1B light chain 3 beta 2;Microtubule-associated proteins 1A/1B light chain 3A	MAP1LC3B;MAP1LC3B2;MAP1LC3A	;;;;	5	2	2	2	2	2	2	2	2	2	2	2	2	28	28	28	9.0115	75	75;125;125;121;125	1	36	0	13.079	28	28	28	3771700000	270410000	289860000	306090000	2	3	1	26
H3BU93;Q9GZU8;H3BNK9;H3BUL4;H3BMX9;H3BQQ6;H3BTI2;H3BTP8;H3BSY6;H3BP64	H3BU93;Q9GZU8;H3BNK9;H3BUL4;H3BMX9	3;3;2;2;2;1;1;1;1;1	3;3;2;2;2;1;1;1;1;1	3;3;2;2;2;1;1;1;1;1	65087000	0	32427000	Protein FAM192A	FAM192A	;;;;	10	3	3	3	3	3	3	3	3	3	3	3	3	16.4	16.4	16.4	19.351	177	177;254;154;160;165;96;106;130;140;148	1	34	0	6.8186	16.4	16.4	16.4	836590000	87016000	28618000	26648000	1	1	1	13
H3BUF6;Q8WWM7-6;Q8WWM7-8;Q8WWM7-5;Q8WWM7-4;Q8WWM7-9;Q8WWM7-2;Q8WWM7;Q8WWM7-3;H3BSK9;Q8WWM7-7;H3BSQ5;H3BUE3;S4R3J6;H3BRB0;F8WB05	H3BUF6;Q8WWM7-6;Q8WWM7-8;Q8WWM7-5;Q8WWM7-4;Q8WWM7-9;Q8WWM7-2;Q8WWM7;Q8WWM7-3;H3BSK9	23;23;23;23;23;23;23;23;23;12;11;5;5;1;1;1	23;23;23;23;23;23;23;23;23;12;11;5;5;1;1;1	22;22;22;22;22;22;22;22;22;12;11;5;5;0;1;0	617930000	635860000	614900000	Ataxin-2-like protein	ATXN2L	;;;;;;;;;	16	23	23	22	22	21	19	22	21	19	21	20	18	24.6	24.6	23.9	112.71	1068	1068;968;1044;1044;1044;1062;1062;1075;1097;336;399;91;217;107;401;424	1	268	0	68.976	24	22.5	19.9	7778400000	643880000	689750000	587600000	10	10	10	124
H3BUK6;H3BP13;Q9UL33-2;Q9UL33;H3BPN3;H3BQQ8	H3BUK6;H3BP13;Q9UL33-2;Q9UL33;H3BPN3;H3BQQ8	2;2;2;2;1;1	2;2;2;2;1;1	2;2;2;2;1;1	0	0	27117000	Trafficking protein particle complex subunit 2-like protein	TRAPPC2L	;;;;;	6	2	2	2	0	1	2	0	1	2	0	1	2	24.8	24.8	24.8	12.561	109	109;241;139;140;75;129	1	8	0	4.8482	0	12.8	24.8	106330000	0	8587300	26838000	0	0	1	5
H3BV80;H3BMM9;H3BTC0;Q15287;H3BMS0;Q15287-3;Q15287-2;H3BPG5;H3BRK4;H3BTV0;H3BNI3;H3BP82;H3BTR6;H3BUG0;H3BTY0;H3BNU7;H3BUL0	H3BV80;H3BMM9;H3BTC0;Q15287;H3BMS0;Q15287-3;Q15287-2;H3BPG5	4;4;4;4;3;3;3;2;1;1;1;1;1;1;1;1;1	4;4;4;4;3;3;3;2;1;1;1;1;1;1;1;1;1	4;4;4;4;3;3;3;2;1;1;1;1;1;1;1;1;1	81411000	73536000	89943000	RNA-binding protein with serine-rich domain 1	RNPS1	;;;;;;;	17	4	4	4	4	3	3	4	3	3	4	3	3	19.9	19.9	19.9	24.561	211	211;284;302;305;257;268;282;128;29;45;85;98;127;139;150;156;169	1	45	0	20.059	19.9	16.6	16.6	1034900000	72481000	46504000	69882000	1	2	2	24
H3BVF7;Q0P6H9;H3BPV2	H3BVF7;Q0P6H9	6;6;2	6;6;2	6;6;2	30534000	40066000	32801000	Transmembrane protein 62	TMEM62	;	3	6	6	6	4	5	3	4	5	3	4	5	3	13.7	13.7	13.7	61.933	540	540;643;129	1	45	0	9.9565	8.1	11.9	8.1	411160000	28255000	74367000	49875000	0	2	3	9
H3BVG0;Q8N1F7;Q8N1F7-2;H3BRI8;H3BM93;H3BNN5;H3BV11;H3BPA9;H3BP95;H3BMX0;H3BVE2;H3BRD9;H3BNG7;H3BV15	H3BVG0;Q8N1F7;Q8N1F7-2	18;18;13;6;6;5;5;5;4;3;2;2;1;1	18;18;13;6;6;5;5;5;4;3;2;2;1;1	18;18;13;6;6;5;5;5;4;3;2;2;1;1	222640000	244600000	261840000	Nuclear pore complex protein Nup93	NUP93	;;	14	18	18	18	13	12	13	13	12	13	13	12	13	26	26	26	99.554	880	880;819;696;151;178;132;136;229;156;125;117;140;40;84	1	172	0	33.921	20.2	17.3	20.2	2832400000	221940000	223740000	195840000	4	6	5	59
H7BXH2;E9PKF6;G8JLI3;Q5H9R7-6;Q5H9R7-2;Q5H9R7;Q5H9R7-5;Q5H9R7-3;Q5H9R7-4;E9PQP7;E9PK08;H0YEN2;E9PNN8;E9PJD8;E9PKG4;H0YDW1	H7BXH2;E9PKF6;G8JLI3;Q5H9R7-6;Q5H9R7-2;Q5H9R7;Q5H9R7-5;Q5H9R7-3;Q5H9R7-4;E9PQP7	18;18;18;18;18;18;18;17;17;11;7;7;6;2;2;2	18;18;18;18;18;18;18;17;17;11;7;7;6;2;2;2	18;18;18;18;18;18;18;17;17;11;7;7;6;2;2;2	368760000	353480000	401500000	Serine/threonine-protein phosphatase 6 regulatory subunit 3	PPP6R3	;;;;;;;;;	16	18	18	18	17	14	16	17	14	16	17	14	16	25.6	25.6	25.6	92.407	827	827;838;879;844;867;873;879;791;793;641;140;580;186;39;75;112	1	214	0	47.996	23.6	19.3	23.9	4444200000	432790000	387940000	419900000	8	5	8	73
H7BXI1;A0FGR8-2;A0FGR8;A0FGR8-6;A0FGR8-4;F2Z3K9;A0FGR8-5	H7BXI1;A0FGR8-2;A0FGR8;A0FGR8-6;A0FGR8-4;F2Z3K9;A0FGR8-5	16;16;16;16;9;8;8	16;16;16;16;9;8;8	16;16;16;16;9;8;8	291610000	294480000	324000000	Extended synaptotagmin-2	ESYT2	;;;;;;	7	16	16	16	14	13	8	14	13	8	14	13	8	28.6	28.6	28.6	98.008	884	884;893;921;942;527;328;328	1	179	0	69.467	25.8	21.9	11.1	3548400000	315740000	235890000	217710000	6	5	7	70
H7BXK9;Q9NP58-4;Q9NP58	H7BXK9;Q9NP58-4;Q9NP58	4;4;4	4;4;4	4;4;4	0	36409000	0	ATP-binding cassette sub-family B member 6, mitochondrial	ABCB6	;;	3	4	4	4	1	3	2	1	3	2	1	3	2	9.9	9.9	9.9	77.434	690	690;796;842	1	20	0	7.2577	1.4	5.7	3.5	198530000	10310000	33398000	18746000	0	1	1	3
H7BXY3;Q7L2E3-3;Q7L2E3;Q7L2E3-2	H7BXY3;Q7L2E3-3;Q7L2E3;Q7L2E3-2	21;21;21;21	21;21;21;21	21;21;21;21	250220000	255890000	241730000	Putative ATP-dependent RNA helicase DHX30	DHX30	;;;	4	21	21	21	14	13	14	14	13	14	14	13	14	20.8	20.8	20.8	130.55	1166	1166;1155;1194;1222	1	187	0	42.981	14.8	13.5	14.2	3284200000	226130000	237120000	237550000	6	7	5	74
H7BY58;P22061;P22061-2;B7Z972;F8WDT3;F8WAV5;F8WAX2;C9J0F2;H7C4X2	H7BY58;P22061;P22061-2;B7Z972	11;11;11;9;3;3;3;2;1	11;11;11;9;3;3;3;2;1	11;11;11;9;3;3;3;2;1	1405900000	1174800000	1538400000	Protein-L-isoaspartate O-methyltransferase;Protein-L-isoaspartate(D-aspartate) O-methyltransferase	PCMT1	;;;	9	11	11	11	10	10	10	10	10	10	10	10	10	49.7	49.7	49.7	30.358	286	286;227;228;192;120;124;130;96;67	1	191	0	85.322	49.7	49.7	49.7	17580000000	1496900000	1220400000	1512200000	9	10	12	123
H7BYN4;Q02241-2;Q02241;B4E1K0;H0YME6;H0YMJ4;H0YKQ5	H7BYN4;Q02241-2;Q02241;B4E1K0	6;6;6;4;2;1;1	6;6;6;4;2;1;1	6;6;6;4;2;1;1	46036000	0	0	Kinesin-like protein;Kinesin-like protein KIF23	KIF23	;;;	7	6	6	6	4	2	1	4	2	1	4	2	1	9.2	9.2	9.2	109.13	952	952;856;960;673;371;109;267	1	30	0	14.322	5.8	3.3	1.4	319520000	51335000	28228000	9031700	1	0	0	8
H7BZJ3	H7BZJ3	7	1	1	1108200000	845760000	880210000		PDIA3		1	7	1	1	7	7	7	1	1	1	1	1	1	54.5	11.4	11.4	13.519	123	123	1	24	0	21.937	54.5	54.5	54.5	10465000000	942750000	727290000	842590000	1	1	1	14
H7BZT4;P61956-2;P61956;Q6EEV6	H7BZT4;P61956-2;P61956;Q6EEV6	2;2;2;1	2;2;2;1	1;1;1;0	1159600000	1407200000	1364200000	Small ubiquitin-related modifier 2;Small ubiquitin-related modifier 4	SUMO2;SUMO4	;;;	4	2	2	1	2	2	2	2	2	2	1	1	1	23.2	23.2	10.5	10.839	95	95;71;95;95	1	45	0	17.775	23.2	23.2	23.2	15147000000	1319400000	1210200000	1404800000	4	2	2	28
H7BZW6;X6RAL5;O00422;U3KPY7	H7BZW6;X6RAL5;O00422	5;5;5;2	5;5;5;2	5;5;5;2	94583000	69696000	0	Histone deacetylase complex subunit SAP18	SAP18	;;	4	5	5	5	4	4	3	4	4	3	4	4	3	49.7	49.7	49.7	16.036	143	143;172;153;78	1	54	0	9.3276	38.5	43.4	33.6	768890000	98899000	63657000	74168000	2	1	1	13
H7C0D5;Q9BSR8	H7C0D5;Q9BSR8	2;2	2;2	2;2	0	74619000	78057000	Protein YIPF4	YIPF4	;	2	2	2	2	1	2	2	1	2	2	1	2	2	31	31	31	6.447	58	58;244	1	18	0.00026947	3.6191	15.5	31	31	693350000	39022000	71596000	82911000	0	1	1	8
H7C0E5;O75312;H7BZM7	H7C0E5;O75312;H7BZM7	7;7;6	7;7;6	7;7;6	69279000	74949000	78715000	Zinc finger protein ZPR1	ZPR1	;;	3	7	7	7	6	5	7	6	5	7	6	5	7	23.1	23.1	23.1	42.542	386	386;459;430	1	58	0	21.522	19.4	16.3	23.1	857230000	86530000	77454000	102050000	3	3	2	17
H7C0X4;Q92685;B4DS50;C9J7S5;Q92685-2;F8WF93;H7BZZ2;F8WE30	H7C0X4;Q92685;B4DS50;C9J7S5;Q92685-2	4;4;3;3;3;1;1;1	4;4;3;3;3;1;1;1	4;4;3;3;3;1;1;1	83966000	36856000	33200000	Dol-P-Man:Man(5)GlcNAc(2)-PP-Dol alpha-1,3-mannosyltransferase	ALG3	;;;;	8	4	4	4	3	3	3	3	3	3	3	3	3	13.3	13.3	13.3	36.898	323	323;438;382;398;390;65;105;107	1	32	0	5.9824	10.2	9.9	9.9	442460000	77382000	37323000	36614000	2	0	1	14
H7C173;H7C202;B8ZZ87;Q6P582;Q6NZ67;H7BZ50	H7C173;H7C202;B8ZZ87;Q6P582;Q6NZ67;H7BZ50	3;3;3;3;3;2	3;3;3;3;3;2	3;3;3;3;3;2	32771000	32609000	35237000	Mitotic-spindle organizing protein 2A;Mitotic-spindle organizing protein 2B	MZT2B;MZT2A	;;;;;	6	3	3	3	2	2	2	2	2	2	2	2	2	34.4	34.4	34.4	12.395	122	122;140;218;158;158;121	1	30	0	4.879	16.4	16.4	16.4	358350000	34698000	27741000	31939000	2	2	2	18
H7C1N3;O15155;C9JTT8;Q68DU7;Q96EA0	H7C1N3;O15155;C9JTT8;Q68DU7;Q96EA0	2;2;1;1;1	2;2;1;1;1	2;2;1;1;1	138310000	141740000	99095000	BET1 homolog	BET1;DKFZp781C0425	;;;;	5	2	2	2	2	2	2	2	2	2	2	2	2	21.8	21.8	21.8	14.872	133	133;118;98;127;83	1	41	0	28.957	21.8	21.8	21.8	1444300000	117170000	132120000	71682000	3	3	2	32
H7C1U8;C9J574;Q9BUR5-2;Q9BUR5;G3V1B6	H7C1U8;C9J574;Q9BUR5-2;Q9BUR5;G3V1B6	4;4;4;4;2	4;4;4;4;2	4;4;4;4;2	95040000	81561000	93902000	Apolipoprotein O	APOO	;;;;	5	4	4	4	3	4	2	3	4	2	3	4	2	24.2	24.2	24.2	20.08	178	178;179;180;198;114	1	42	0	9.2131	15.7	24.2	12.4	1050000000	96927000	66284000	47227000	2	4	2	23
H7C2Q8;Q99848	H7C2Q8;Q99848	4;4	4;4	4;4	34665000	59355000	63297000	Probable rRNA-processing protein EBP2	EBNA1BP2	;	2	4	4	4	4	2	2	4	2	2	4	2	2	14.7	14.7	14.7	40.684	361	361;306	1	34	0	8.2446	14.7	5.5	5.5	597650000	53251000	44266000	47705000	0	2	1	22
H7C389;Q8ND98;Q96MX6-2;Q96MX6	H7C389;Q8ND98;Q96MX6-2;Q96MX6	3;3;3;3	3;3;3;3	3;3;3;3	38546000	26866000	35875000	WD repeat-containing protein 92	WDR92;DKFZp434B156	;;;	4	3	3	3	3	2	3	3	2	3	3	2	3	34.8	34.8	34.8	10.392	92	92;187;288;357	1	31	0.00051138	2.9217	34.8	27.2	34.8	396040000	45105000	24538000	28870000	2	1	1	8
H7C5A7;O14734;H0Y698;Q9BR14;E9PMC4;E9PIS4;E9PJN0	H7C5A7;O14734;H0Y698;Q9BR14;E9PMC4;E9PIS4;E9PJN0	2;2;1;1;1;1;1	2;2;1;1;1;1;1	2;2;1;1;1;1;1	52580000	42057000	50435000	Acyl-coenzyme A thioesterase 8	ACOT8	;;;;;;	7	2	2	2	2	1	2	2	1	2	2	1	2	15.3	15.3	15.3	23.333	209	209;319;74;92;94;132;226	1	27	0	6.3756	15.3	7.7	15.3	391190000	58808000	30431000	53579000	2	2	1	8
H9KV85;Q8N4C6-11;Q8N4C6-9;Q8N4C6-2;Q8N4C6;Q8N4C6-5;Q8N4C6-10;Q8N4C6-7;H0YDJ4;C9J066;Q8N4C6-4	H9KV85;Q8N4C6-11;Q8N4C6-9;Q8N4C6-2;Q8N4C6;Q8N4C6-5;Q8N4C6-10;Q8N4C6-7;H0YDJ4;C9J066;Q8N4C6-4	3;3;3;3;3;3;3;3;2;2;2	2;2;2;2;2;2;2;2;1;1;1	2;2;2;2;2;2;2;2;1;1;1	0	283420000	0	Ninein	NIN	;;;;;;;;;;	11	3	2	2	3	3	3	2	2	2	2	2	2	2.8	2.3	2.3	184.49	1581	1581;1377;2052;2073;2090;2096;2116;2133;1537;2046;2029	1	22	0.0069654	1.8932	2.8	2.8	2.8	2890700000	158990000	280120000	154940000	0	1	0	2
I1E4Y6;Q6Y7W6-4;Q6Y7W6-5;Q6Y7W6;Q6Y7W6-3;E9PC50;C9JHW1;E7ESB6;C9JH18;F8WCD5;C9JPV7;C9JXQ0;C9J0V6;C9JHT0;C9JRZ2;C9J7G1;B8ZZD2	I1E4Y6;Q6Y7W6-4;Q6Y7W6-5;Q6Y7W6;Q6Y7W6-3;E9PC50;C9JHW1;E7ESB6	15;15;15;15;14;10;8;8;2;1;1;1;1;1;1;1;1	15;15;15;15;14;10;8;8;2;1;1;1;1;1;1;1;1	15;15;15;15;14;10;8;8;2;1;1;1;1;1;1;1;1	241240000	246220000	255790000	PERQ amino acid-rich with GYF domain-containing protein 2	GIGYF2	;;;;;;;	17	15	15	15	12	12	9	12	12	9	12	12	9	16.1	16.1	16.1	152.53	1321	1321;1286;1293;1299;1320;872;720;836;149;92;93;99;106;112;115;143;176	1	190	0	33.715	11.8	11.8	9.1	2897200000	241030000	319800000	217670000	5	7	5	62
I3L0N3;P46459;B4DFA2;I3L2G1;K7EQD6;I3L0L3;I3L338;I3L4Q9	I3L0N3;P46459;B4DFA2	27;27;25;7;6;5;2;2	27;27;25;7;6;5;2;2	27;27;25;7;6;5;2;2	478730000	450640000	400630000	Vesicle-fusing ATPase	NSF	;;	8	27	27	27	18	16	16	18	16	16	18	16	16	40.9	40.9	40.9	82.091	739	739;744;644;136;180;161;44;81	1	226	0	62.205	29.8	24.8	24.8	5299100000	544320000	394400000	384700000	7	8	6	79
I3L0U2;Q9Y6M0-3;Q9Y6M0-2;Q9Y6M0;I3L3C7	I3L0U2;Q9Y6M0-3;Q9Y6M0-2;Q9Y6M0;I3L3C7	4;4;4;4;3	4;4;4;4;3	4;4;4;4;3	61066000	75890000	73087000	Testisin	PRSS21	;;;;	5	4	4	4	3	2	3	3	2	3	3	2	3	20.2	20.2	20.2	24.706	218	218;300;312;314;256	1	36	0	7.3993	15.1	11	16.1	894660000	65734000	55340000	75301000	3	0	1	12
I3L1D4;B0QYY7;S4R469;F8VR27;F8VZY7;B0QYV1;B0QYY4;J3KNW3;B7Z1U7;F8VZG9;O43251-9;Q9NWB1-3;O43251-4;O43251-5;O43251-10;O43251-2;O43251;Q9NWB1-4;Q9NWB1-5;Q9NWB1;O43251-7;Q9NWB1-2;O43251-6;O43251-8;B0QYY6;S4R3K7;J3QQZ2;J3QRF4;F8VRS4;A6NFN3;B4DF29;O43251-3	I3L1D4;B0QYY7;S4R469;F8VR27;F8VZY7;B0QYV1;B0QYY4;J3KNW3;B7Z1U7;F8VZG9;O43251-9;Q9NWB1-3;O43251-4;O43251-5;O43251-10;O43251-2;O43251;Q9NWB1-4;Q9NWB1-5;Q9NWB1;O43251-7;Q9NWB1-2;O43251-6;O43251-8;B0QYY6;S4R3K7;J3QQZ2;J3QRF4;F8VRS4;A6NFN3;B4DF29;O43251-3	2;2;2;2;2;2;2;2;2;2;2;2;2;2;2;2;2;2;2;2;2;2;2;2;1;1;1;1;1;1;1;1	2;2;2;2;2;2;2;2;2;2;2;2;2;2;2;2;2;2;2;2;2;2;2;2;1;1;1;1;1;1;1;1	2;2;2;2;2;2;2;2;2;2;2;2;2;2;2;2;2;2;2;2;2;2;2;2;1;1;1;1;1;1;1;1	25913000	24552000	20715000	RNA binding protein fox-1 homolog;RNA binding protein fox-1 homolog 2;RNA binding protein fox-1 homolog 1;RNA binding protein fox-1 homolog 3	RBFOX1;RBFOX2;RBFOX3	;;;;;;;;;;;;;;;;;;;;;;;;;;;;;;;	32	2	2	2	2	2	2	2	2	2	2	2	2	12.7	12.7	12.7	20.66	189	189;200;234;262;263;357;370;402;425;466;367;370;370;376;380;381;390;392;395;397;400;418;450;451;128;230;328;358;391;312;325;358	1	20	0.0051753	1.9965	12.7	12.7	12.7	213860000	26375000	22999000	19977000	0	1	2	11
I3L1P8;Q02978;Q02978-2	I3L1P8;Q02978;Q02978-2	11;11;8	11;11;8	11;11;8	421110000	437820000	392880000	Mitochondrial 2-oxoglutarate/malate carrier protein	SLC25A11	;;	3	11	11	11	7	10	10	7	10	10	7	10	10	46.6	46.6	46.6	32.182	296	296;314;263	1	116	0	62.778	32.8	43.6	43.6	4955400000	395980000	502700000	443870000	7	7	10	74
I3L1R7;Q99447;Q99447-3;I3L3V9;I3L2Q1;I3L1L9;Q99447-2;Q99447-4;I3L102	I3L1R7;Q99447;Q99447-3;I3L3V9;I3L2Q1;I3L1L9;Q99447-2;Q99447-4	4;4;4;3;3;3;3;3;1	4;4;4;3;3;3;3;3;1	4;4;4;3;3;3;3;3;1	50586000	40405000	33436000	Ethanolamine-phosphate cytidylyltransferase	PCYT2	;;;;;;;	9	4	4	4	3	3	4	3	3	4	3	3	4	12.5	12.5	12.5	41.395	367	367;389;407;207;286;314;311;357;44	1	36	0	7.5587	10.4	8.4	12.5	504820000	37342000	41117000	49660000	3	1	0	14
I3L2C7;P57678;I3L399;E7EN12;I3L4M4;I3L4A4	I3L2C7;P57678	12;12;2;1;1;1	12;12;2;1;1;1	12;12;2;1;1;1	82482000	73866000	75886000	Gem-associated protein 4	GEMIN4	;	6	12	12	12	9	8	5	9	8	5	9	8	5	15.1	15.1	15.1	118.82	1047	1047;1058;296;184;189;271	1	81	0	13.813	11.9	10	6.5	1065300000	99594000	93709000	56399000	4	2	2	30
I3L2X1;Q9BYC9;B7Z746	I3L2X1;Q9BYC9;B7Z746	1;1;1	1;1;1	1;1;1	57862000	0	52368000	39S ribosomal protein L20, mitochondrial	MRPL20	;;	3	1	1	1	1	1	1	1	1	1	1	1	1	16.7	16.7	16.7	7.5961	66	66;149;155	1	20	0.004066	2.1934	16.7	16.7	16.7	480990000	63070000	20467000	53196000	0	1	0	10
I3L3C4;I3L3U9;J3QSV6;O76021;I3L234	I3L3C4;I3L3U9;J3QSV6;O76021;I3L234	3;3;3;3;2	3;3;3;3;2	3;3;3;3;2	10221000	0	42658000	Ribosomal L1 domain-containing protein 1	RSL1D1	;;;;	5	3	3	3	2	2	2	2	2	2	2	2	2	20.9	20.9	20.9	18.535	158	158;296;430;490;98	1	25	0.00026759	3.5346	12.7	12.7	12.7	468660000	21524000	34300000	35523000	1	0	1	8
I3L3V4;I3L4Z6;I3L0K1;E7EQ34;O14653;O14653-2;I3NI02;I3L1K7;O14653-3	I3L3V4;I3L4Z6;I3L0K1;E7EQ34;O14653;O14653-2;I3NI02;I3L1K7;O14653-3	2;2;2;2;2;2;1;1;1	2;2;2;2;2;2;1;1;1	2;2;2;2;2;2;1;1;1	14598000	0	11325000	Golgi SNAP receptor complex member 2	GOSR2	;;;;;;;;	9	2	2	2	1	1	1	1	1	1	1	1	1	18.1	18.1	18.1	17.794	149	149;165;199;232;212;213;98;143;195	1	19	0	6.8955	10.7	10.7	10.7	143150000	13955000	9177600	11087000	1	0	0	9
I3L4N6;Q9UP95-5;Q9UP95-2;Q9UP95-6;Q9UP95;Q9UP95-7;Q9UP95-3;Q9UP95-4;B3KXX3;Q9UHW9-6;Q9UHW9-5;Q9UHW9-2;Q9H2X9-2;Q9UHW9-3;Q9H2X9;Q9UHW9-4;Q9UHW9;H0YMQ9;H0YKQ8	I3L4N6;Q9UP95-5;Q9UP95-2;Q9UP95-6;Q9UP95;Q9UP95-7;Q9UP95-3;Q9UP95-4	7;7;7;7;7;7;6;4;3;3;3;3;3;3;3;3;3;2;2	7;7;7;7;7;7;6;4;3;3;3;3;3;3;3;3;3;2;2	7;7;7;7;7;7;6;4;3;3;3;3;3;3;3;3;3;2;2	39737000	0	0	Solute carrier family 12 member 4	SLC12A4	;;;;;;;	19	7	7	7	4	1	1	4	1	1	4	1	1	7.3	7.3	7.3	115.05	1037	1037;1054;1068;1079;1085;1087;1011;780;962;1084;1091;1099;1116;1135;1139;1141;1150;906;942	1	33	0	9.1105	4.3	1.2	1.2	333640000	26619000	6912700	4310000	4	1	1	20
I3L533;I3L2R9;Q9NXR1-2;Q9NXR1;I3L2R3;I3L2T8;I3L522;J3QSD2;J3QRZ1;A6NIZ0;Q9GZM8-3;Q9GZM8;Q9GZM8-2	I3L533;I3L2R9;Q9NXR1-2;Q9NXR1;I3L2R3;I3L2T8;I3L522	3;3;3;3;2;2;2;1;1;1;1;1;1	3;3;3;3;2;2;2;1;1;1;1;1;1	3;3;3;3;2;2;2;1;1;1;1;1;1	23524000	0	0	Nuclear distribution protein nudE homolog 1	NDE1	;;;;;;	13	3	3	3	2	2	1	2	2	1	2	2	1	26.8	26.8	26.8	15.744	153	153;173;335;346;137;139;192;194;196;269;328;345;367	1	17	0	7.1072	20.3	14.4	12.4	168050000	23758000	19458000	13127000	1	2	1	12
J3KMX1;Q99567;I3L245	J3KMX1;Q99567	7;7;3	7;7;3	7;7;3	72937000	0	55334000	Nuclear pore complex protein Nup88	NUP88	;	3	7	7	7	5	4	6	5	4	6	5	4	6	16.1	16.1	16.1	78.77	696	696;741;153	1	60	0	17.226	11.9	8.5	12.6	985210000	64613000	58635000	77141000	0	0	2	16
J3KMX2;Q92925-3;Q92925-2;Q92925;J3QWB6;F8VW95;F8VZ70;F8VUB0;Q6STE5	J3KMX2;Q92925-3;Q92925-2;Q92925;J3QWB6	4;4;4;4;2;1;1;1;1	4;4;4;4;2;1;1;1;1	3;3;3;3;2;0;0;0;0	47178000	0	64905000	SWI/SNF-related matrix-associated actin-dependent regulator of chromatin subfamily D member 2	SMARCD2	;;;;	9	4	4	3	2	2	2	2	2	2	1	1	1	15.8	15.8	12.1	52.238	456	456;483;510;531;231;113;278;289;483	1	31	0	9.9725	9.2	8.1	8.1	375350000	42325000	26247000	27450000	2	1	2	15
J3KMY5;H0YIZ1;G3V3E8;E7EMS2;G3V3D1;P61916;G3V2V8;B4DQV7	J3KMY5;H0YIZ1;G3V3E8;E7EMS2;G3V3D1;P61916;G3V2V8;B4DQV7	5;5;5;5;5;5;4;4	5;5;5;5;5;5;4;4	5;5;5;5;5;5;4;4	297040000	264990000	372090000	Epididymal secretory protein E1	NPC2	;;;;;;;	8	5	5	5	5	5	5	5	5	5	5	5	5	43.2	43.2	43.2	16.23	148	148;173;174;201;221;151;122;125	1	86	0	59.045	43.2	43.2	43.2	4397700000	316390000	357830000	467840000	4	4	3	54
J3KMZ8;B4DT58;Q92785;E9PN04	J3KMZ8;B4DT58;Q92785;E9PN04	2;2;2;1	2;2;2;1	2;2;2;1	23193000	23299000	25479000	Zinc finger protein ubi-d4	DPF2	;;;	4	2	2	2	2	2	2	2	2	2	2	2	2	7.7	7.7	7.7	45.78	405	405;207;391;106	1	17	0	5.0534	7.7	7.7	7.7	230130000	22360000	22991000	25237000	0	1	1	7
J3KMZ9;P01130-3;P01130-4;P01130;P01130-2;P01130-6	J3KMZ9;P01130-3;P01130-4;P01130;P01130-2;P01130-6	13;13;13;13;12;12	13;13;13;13;12;12	1;1;1;1;1;1	442850000	460650000	476170000	Low-density lipoprotein receptor	LDLR	;;;;;	6	13	13	1	13	11	10	13	11	10	1	1	1	18.2	18.2	2.1	104.56	945	945;692;819;860;682;739	1	169	0	63.355	18.2	14.6	13.1	5659100000	500860000	450860000	539460000	8	8	6	85
J3KN16;Q5VYK3;R4GMY1;Q5VYK5;F6XAQ5;R4GMY3	J3KN16;Q5VYK3	39;39;17;5;5;2	39;39;17;5;5;2	39;39;17;5;5;2	717010000	615160000	662270000	Proteasome-associated protein ECM29 homolog	KIAA0368;ECM29	;	6	39	39	39	27	26	24	27	26	24	27	26	24	26.8	26.8	26.8	223.69	2017	2017;1845;890;129;142;128	1	347	0	114.94	17.4	17.5	15.9	8317300000	702840000	559390000	589240000	16	9	12	154
J3KN32;Q9UKL0;E9PQE5;B4DV59;Q9P2K3-2;Q9P2K3-4;Q9P2K3;Q9P2K3-3	J3KN32;Q9UKL0	3;3;1;1;1;1;1;1	3;3;1;1;1;1;1;1	3;3;1;1;1;1;1;1	0	27903000	28685000	REST corepressor 1	RCOR1	;	8	3	3	3	1	2	2	1	2	2	1	2	2	12.8	12.8	12.8	53.327	485	485;482;149;374;436;449;495;553	1	21	0	6.561	4.9	8.7	8.7	282620000	20096000	23810000	26534000	1	2	0	8
J3KN36;Q5JPE7-2;P69849;Q5JPE7;F5H826;Q5JPE7-3;H3BPS9;I3L0Q6;H3BTW1;I3L1G6	J3KN36;Q5JPE7-2;P69849;Q5JPE7;F5H826;Q5JPE7-3	37;37;37;37;33;33;5;2;2;1	37;37;37;37;33;33;5;2;2;1	3;3;3;3;3;3;1;0;0;1	1340400000	1305500000	1453800000	Nodal modulator 2;Nodal modulator 3	NOMO3;NOMO2	;;;;;	10	37	37	3	28	30	28	28	30	28	1	1	1	41.4	41.4	3.1	139.38	1267	1267;1222;1222;1267;1100;1100;223;138;138;95	1	445	0	236.24	33.2	34.4	32.7	16301000000	1303400000	1241800000	1517000000	28	23	25	288
J3KN66;Q5JTV8;H0Y4R4;Q5JTV8-2;H0YD16;H0YDU3	J3KN66;Q5JTV8;H0Y4R4	14;13;8;5;4;3	14;13;8;5;4;3	13;12;7;4;4;3	596790000	561700000	517470000	Torsin-1A-interacting protein 1	TOR1AIP1	;;	6	14	14	13	13	13	13	13	13	13	12	12	12	30.9	30.9	29.2	67.821	599	599;583;296;378;198;193	1	165	0	109.41	28.4	28.4	29.2	6796800000	650430000	600930000	583560000	11	7	8	94
J3KN67;H0YLS7;D6RGJ6	J3KN67	22;1;1	1;1;1	0;0;0	0	505260000	499300000		TPM3		3	22	1	0	20	20	21	1	1	1	0	0	0	53.3	3.2	0	33.222	285	285;40;75	1	33	1	-2	48.4	48.4	50.9	6580300000	447590000	516320000	610640000	1	0	1	12
J3KN69;Q6PIU2;Q6PIU2-2;H7C046;Q6PIU2-3;F8WE33	J3KN69;Q6PIU2;Q6PIU2-2;H7C046;Q6PIU2-3	8;8;8;6;5;1	8;8;8;6;5;1	8;8;8;6;5;1	340750000	290110000	322330000	Neutral cholesterol ester hydrolase 1	NCEH1	;;;;	6	8	8	8	7	7	8	7	7	8	7	7	8	24.8	24.8	24.8	49.062	440	440;408;416;307;275;93	1	110	0	55.573	23.2	23.2	24.8	4091200000	363730000	267840000	329330000	5	5	7	68
J3KN82;Q96GX9;S4R3D6;Q96GX9-3	J3KN82;Q96GX9;S4R3D6;Q96GX9-3	4;4;3;3	4;4;3;3	4;4;3;3	99627000	123430000	124620000	Methylthioribulose-1-phosphate dehydratase	APIP	;;;	4	4	4	4	4	3	4	4	3	4	4	3	4	20.8	20.8	20.8	29.3	259	259;242;195;204	1	54	0	23.887	20.8	14.3	20.8	1277700000	145000000	105670000	77088000	5	2	1	38
J3KNC0;P52655	J3KNC0;P52655	2;2	2;2	2;2	44759000	0	0	Transcription initiation factor IIA subunit 1;Transcription initiation factor IIA alpha chain;Transcription initiation factor IIA beta chain	GTF2A1	;	2	2	2	2	2	1	1	2	1	1	2	1	1	47.5	47.5	47.5	6.7407	59	59;376	1	17	0	11.398	47.5	18.6	18.6	335850000	45500000	0	27434000	2	1	0	11
J3KNF4;O14618;E9PP76;E9PK03	J3KNF4;O14618;E9PP76	3;3;2;1	3;3;2;1	3;3;2;1	24652000	17884000	19802000	Copper chaperone for superoxide dismutase;Superoxide dismutase [Cu-Zn]	CCS	;;	4	3	3	3	3	2	2	3	2	2	3	2	2	9	9	9	27.086	255	255;274;68;249	1	25	0.0026882	2.419	9	6.3	6.3	309190000	32675000	17812000	18126000	1	0	1	8
J3KNF8;J3QR91	J3KNF8	5;1	5;1	1;0	1573500000	1726400000	1895300000		CYB5B		2	5	5	1	5	5	5	5	5	5	1	1	1	59.3	59.3	10	16.694	150	150;64	1	125	0	133.12	59.3	59.3	59.3	21668000000	1592600000	1617600000	1926000000	9	12	10	116
J3KNK7;H3BND4;E7EMH5;E7EPL4;H3BNZ1;Q6P996;Q86XE2;Q6P996-2;H3BNL6;Q6P474	J3KNK7;H3BND4;E7EMH5;E7EPL4;H3BNZ1;Q6P996	18;18;18;18;18;18;6;5;2;2	18;18;18;18;18;18;6;5;2;2	18;18;18;18;18;18;6;5;2;2	400290000	429980000	436220000	Pyridoxal-dependent decarboxylase domain-containing protein 1	PDXDC1	;;;;;	10	18	18	18	14	15	13	14	15	13	14	15	13	35.4	35.4	35.4	85.12	773	773;806;697;760;761;788;498;429;271;469	1	196	0	64.331	28.8	30.5	27.7	5313700000	423220000	416100000	386840000	5	7	5	84
J3KNL6;O15027;O15027-5;O15027-2;O15027-4;O15027-3;X6RGP5;Q8N9G1	J3KNL6;O15027;O15027-5;O15027-2;O15027-4;O15027-3;X6RGP5	30;27;27;26;26;26;17;3	30;27;27;26;26;26;17;3	30;27;27;26;26;26;17;3	482800000	581520000	527890000	Protein transport protein Sec16A	SEC16A	;;;;;;	8	30	30	30	22	21	24	22	21	24	22	21	24	21.6	21.6	21.6	251.89	2357	2357;2179;2201;2134;2154;2159;1059;385	1	263	0	56.883	14.2	14	16	6507800000	579380000	637200000	582120000	10	10	10	109
J3KNQ4;Q9NVD7;F5H1R9;B7Z952;E9PS97;Q9NVD7-2	J3KNQ4;Q9NVD7;F5H1R9;B7Z952;E9PS97	9;9;8;6;5;2	9;9;8;6;5;2	7;7;6;5;5;2	259310000	268670000	252520000	Alpha-parvin	PARVA	;;;;	6	9	9	7	9	8	8	9	8	8	7	6	6	27.7	27.7	22.6	46.589	412	412;372;372;290;209;182	1	107	0	55.23	27.7	24.3	24.3	3273900000	272490000	279240000	259350000	8	6	6	63
J3KNW4;Q14192	J3KNW4;Q14192	9;9	9;9	9;9	225570000	262780000	213180000	Four and a half LIM domains protein 2	FHL2	;	2	9	9	9	6	7	8	6	7	8	6	7	8	26.5	26.5	26.5	44.205	389	389;279	1	100	0	21.513	18.3	22.1	24.4	2793800000	200330000	265710000	228310000	5	4	6	55
J3KNX9;Q92614-2;Q92614-3;Q92614-4;Q92614;Q92614-5;H0YEV9	J3KNX9;Q92614-2;Q92614-3;Q92614-4;Q92614;Q92614-5	10;10;10;10;10;8;2	10;10;10;10;10;8;2	10;10;10;10;10;8;2	56480000	45580000	68331000	Unconventional myosin-XVIIIa	MYO18A	;;;;;	7	10	10	10	7	3	3	7	3	3	7	3	3	6.5	6.5	6.5	233.14	2054	2054;1723;2002;2039;2054;1581;197	1	65	0	15.719	4.8	1.8	1.5	711300000	54015000	17413000	44430000	2	1	0	12
J3KP15;Q01130;J3QL05;B4DN89;Q9BRL6-2;Q9BRL6	J3KP15;Q01130;J3QL05;B4DN89	7;7;6;6;2;2	7;7;6;6;2;2	7;7;6;6;2;2	1516500000	1514200000	1592300000	Serine/arginine-rich splicing factor 2	SRSF2	;;;	6	7	7	7	7	7	7	7	7	7	7	7	7	55.6	55.6	55.6	15.371	133	133;221;130;209;275;282	1	138	0	210.16	55.6	55.6	55.6	19354000000	1599900000	1503500000	1291200000	8	7	9	90
J3KP30;Q5QJE6	J3KP30;Q5QJE6	2;2	2;2	2;2	0	36824000	0	Deoxynucleotidyltransferase terminal-interacting protein 2	DNTTIP2	;	2	2	2	2	2	2	1	2	2	1	2	2	1	4.5	4.5	4.5	66.174	601	601;756	1	14	0.0040495	2.1275	4.5	4.5	2	277330000	33722000	33779000	22445000	0	0	0	1
J3KPN1;Q96BS2;Q96BS2-3;Q96BS2-2;E9PQ58;H0YIX4	J3KPN1;Q96BS2;Q96BS2-3;Q96BS2-2	7;7;6;5;3;1	7;7;6;5;3;1	7;7;6;5;3;1	204590000	184700000	224200000	Calcineurin B homologous protein 3	TESC	;;;	6	7	7	7	5	4	6	5	4	6	5	4	6	30	30	30	30.289	267	267;214;187;163;135;81	1	76	0	24.602	21.3	18.7	25.1	2491500000	186130000	146950000	290190000	4	4	4	44
J3KPP4;O95232;B4DJ96;D6RDI2;C9JL41;O95232-2;E7EN55;H0YA81;D6RHH0;H7C5U7;U3KQT3;H0YBV7;H0YAR4	J3KPP4;O95232;B4DJ96;D6RDI2	14;14;10;7;3;3;2;2;1;1;1;1;1	14;14;10;7;3;3;2;2;1;1;1;1;1	14;14;10;7;3;3;2;2;1;1;1;1;1	317920000	384710000	319170000	Luc7-like protein 3	LUC7L3	;;;	13	14	14	14	11	8	10	11	8	10	11	8	10	31.7	31.7	31.7	58.22	489	489;432;356;184;79;79;54;207;36;39;46;118;123	1	129	0	111.23	26	18.8	22.1	3847500000	383730000	221830000	336650000	8	5	6	62
J3KPS0;Q9NXW2;Q9NXW2-2;V9GYN7	J3KPS0;Q9NXW2;Q9NXW2-2	4;4;4;1	4;4;4;1	4;4;4;1	45761000	50362000	0	DnaJ homolog subfamily B member 12	DNAJB12	;;	4	4	4	4	3	4	3	3	4	3	3	4	3	13.9	13.9	13.9	45.489	409	409;375;377;276	1	36	0	5.289	11.7	13.9	11.2	600350000	50770000	56913000	34642000	0	0	0	4
J3KPT4;Q9H4I3;Q9H4I3-2	J3KPT4;Q9H4I3;Q9H4I3-2	4;4;2	4;4;2	4;4;2	0	32381000	0	TraB domain-containing protein	TRABD	;;	3	4	4	4	1	2	1	1	2	1	1	2	1	16.4	16.4	16.4	42.692	379	379;376;330	1	20	0	4.2046	3.2	8.2	3.2	393630000	21735000	28515000	25702000	0	1	1	7
J3KPX7;Q99623;F5GY37;Q99623-2;F5GWA7;F5H3X6;F5H0C5;F5H2D2;U3KPZ5	J3KPX7;Q99623;F5GY37;Q99623-2;F5GWA7;F5H3X6	16;16;14;13;10;8;4;3;3	16;16;14;13;10;8;4;3;3	16;16;14;13;10;8;4;3;3	3602600000	3725200000	3638500000	Prohibitin-2	PHB2	;;;;;	9	16	16	16	14	15	14	14	15	14	14	15	14	59.9	59.9	59.9	33.402	299	299;299;267;261;261;213;112;87;103	1	244	0	323.31	54.2	57.2	51.8	43872000000	3325600000	3173900000	3310500000	15	14	12	179
J3KQ12;Q96G97;Q96G97-4;F8W7Q8;Q96G97-3;H0YF20;H7BYY0;H7C2D5;E9PIU3;H7BXM1	J3KQ12;Q96G97;Q96G97-4;F8W7Q8;Q96G97-3	3;3;3;2;2;1;1;1;1;1	3;3;3;2;2;1;1;1;1;1	3;3;3;2;2;1;1;1;1;1	0	30716000	0	Seipin	BSCL2	;;;;	10	3	3	3	1	2	1	1	2	1	1	2	1	5.6	5.6	5.6	51.286	464	464;398;462;223;287;52;79;150;226;277	1	20	0.00026062	3.2105	1.9	3.9	1.9	211770000	7881100	26123000	0	0	1	1	5
J3KQ32;Q9NTK5;Q9NTK5-3;Q9NTK5-2;C9JTK6;C9JCJ9	J3KQ32;Q9NTK5;Q9NTK5-3;Q9NTK5-2	24;24;16;14;7;6	24;24;16;14;7;6	24;24;16;14;7;6	1582700000	1575700000	1680300000	Obg-like ATPase 1	OLA1	;;;	6	24	24	24	22	24	19	22	24	19	22	24	19	65.6	65.6	65.6	46.937	416	416;396;278;238;116;103	1	295	0	69.965	62	65.6	55.5	20547000000	2022700000	2113200000	1453400000	16	16	11	158
J3KQ34;Q9H9Q2;J3QT73;Q9H9Q2-2;J3KQ41;Q9H9Q2-3	J3KQ34;Q9H9Q2;J3QT73;Q9H9Q2-2	3;3;2;2;1;1	3;3;2;2;1;1	3;3;2;2;1;1	51045000	44613000	37396000	COP9 signalosome complex subunit 7b	COPS7B	;;;	6	3	3	3	2	2	2	2	2	2	2	2	2	18.7	18.7	18.7	26.424	230	230;264;172;157;278;273	1	25	0	15.383	13	11.3	11.3	497490000	35598000	47500000	41691000	2	0	0	13
J3KQ48;Q9Y3E5	J3KQ48;Q9Y3E5	5;5	5;5	5;5	222550000	226560000	253840000	Peptidyl-tRNA hydrolase 2, mitochondrial	PTRH2	;	2	5	5	5	5	4	4	5	4	4	5	4	4	47.2	47.2	47.2	19.325	180	180;179	1	92	0	57.381	47.2	39.4	39.4	2799000000	240590000	173050000	207980000	4	7	5	57
J3KQ73;Q14318;U3KQ64;Q14318-3;U3KQI1;M0R1Q0;M0R1S6	J3KQ73;Q14318;U3KQ64	10;9;5;4;2;1;1	10;9;5;4;2;1;1	1;0;0;0;0;0;0	335710000	310660000	318420000	Peptidyl-prolyl cis-trans isomerase FKBP8	FKBP8	;;	7	10	10	1	8	7	8	8	7	8	0	0	1	27.4	27.4	1.6	47.143	441	441;412;182;253;103;163;167	1	107	0	78.391	23.4	18.4	20	3898000000	428610000	314980000	356350000	6	5	7	60
J3KQJ1;Q8NBJ7;C9JL30;A8MXB9;C9J660;Q8NBJ7-2;E9PBT8;H7C3B2;F8WA42;Q8NBJ7-3;J3QT17;Q8NBJ7-5;F8WEX5;E9PG02;F8WEV7;F8WES7;Q8NBJ7-4	J3KQJ1;Q8NBJ7;C9JL30;A8MXB9;C9J660;Q8NBJ7-2;E9PBT8;H7C3B2;F8WA42;Q8NBJ7-3;J3QT17;Q8NBJ7-5	6;6;5;5;5;5;4;4;4;4;3;3;2;2;1;1;1	6;6;5;5;5;5;4;4;4;4;3;3;2;2;1;1;1	6;6;5;5;5;5;4;4;4;4;3;3;2;2;1;1;1	231330000	224080000	232970000	Sulfatase-modifying factor 2	SUMF2	;;;;;;;;;;;	17	6	6	6	6	5	6	6	5	6	6	5	6	20	20	20	35.922	320	320;301;293;305;352;213;232;304;358;339;236;217;165;183;102;150;321	1	80	0	34.508	20	16.6	20	2914200000	294970000	156470000	220970000	4	4	2	40
J3KQS6;Q9NWV8;M0QX07;M0R3F4;M0R2A4;M0R2K3;M0R193;M0R0I0;M0R2I2;M0QY17;Q9NWV8-3;M0QXG9;Q9NWV8-2	J3KQS6;Q9NWV8;M0QX07;M0R3F4;M0R2A4;M0R2K3;M0R193;M0R0I0;M0R2I2	5;5;4;3;3;3;3;3;3;2;2;1;1	5;5;4;3;3;3;3;3;3;2;2;1;1	5;5;4;3;3;3;3;3;3;2;2;1;1	62449000	73907000	85775000	BRISC and BRCA1-A complex member 1	BABAM1	;;;;;;;;	13	5	5	5	5	4	4	5	4	4	5	4	4	23.7	23.7	23.7	36.426	329	329;329;254;181;193;200;218;225;237;108;171;184;184	1	52	0	20.847	23.7	20.1	16.4	820260000	90239000	70031000	72916000	3	1	1	23
J3KQU9;B3KXW5;O43747;O43747-2;H3BNR4;H3BR36;H3BUN9;H3BRM7;H3BN71;B4DGE1;B3KNW1;H3BN75;H3BS13;H3BV30	J3KQU9;B3KXW5;O43747;O43747-2	17;17;17;17;7;5;5;3;3;3;2;1;1;1	17;17;17;17;7;5;5;3;3;3;2;1;1;1	17;17;17;17;7;5;5;3;3;3;2;1;1;1	536870000	455670000	509160000	AP-1 complex subunit gamma-1	AP1G1	;;;	14	17	17	17	14	15	14	14	15	14	14	15	14	27.8	27.8	27.8	91.695	825	825;845;822;825;236;187;208;139;144;176;247;53;85;91	1	234	0	115.47	22.2	24	22.3	6243700000	485890000	486610000	489290000	11	7	12	126
J3KR97;Q9BTW9;Q9BTW9-4;Q9BTW9-5;I3L439;I3L163;C9J1U4;I3L4D2;I3L3H4;I3L131;I3L143;I3L0V3;I3L500;Q9BTW9-3;I3L1S3;I3L120	J3KR97;Q9BTW9;Q9BTW9-4;Q9BTW9-5	14;14;14;8;5;4;4;3;3;3;3;3;3;3;2;2	14;14;14;8;5;4;4;3;3;3;3;3;3;3;2;2	14;14;14;8;5;4;4;3;3;3;3;3;3;3;2;2	169460000	145300000	149030000	Tubulin-specific chaperone D	TBCD	;;;	16	14	14	14	11	8	8	11	8	8	11	8	8	15.6	15.6	15.6	136.55	1230	1230;1192;1248;757;256;244;311;109;134;141;211;237;251;151;117;260	1	124	0	38.056	12.4	8.7	9.3	1962700000	225380000	133260000	124620000	8	5	3	48
J3KRX0;P34810-2;P34810-3;P34810	J3KRX0;P34810-2;P34810-3;P34810	1;1;1;1	1;1;1;1	1;1;1;1	67842000	0	45158000	Macrosialin	CD68	;;;	4	1	1	1	1	0	1	1	0	1	1	0	1	26.4	26.4	26.4	13.18	121	121;297;327;354	1	14	0	5.0069	26.4	0	26.4	534680000	85093000	0	37369000	1	0	0	7
J3KS15;Q14197	J3KS15;Q14197	3;3	3;3	3;3	72659000	76274000	82155000	Peptidyl-tRNA hydrolase ICT1, mitochondrial	ICT1	;	2	3	3	3	3	3	3	3	3	3	3	3	3	18.2	18.2	18.2	21.905	192	192;206	1	34	0	15.391	18.2	18.2	18.2	881820000	75143000	78549000	90433000	1	1	2	16
J3KSY6;Q8TCD5;J3KSX6;J3KRC4;J3KSF0;J3QQX8;Q8TCD5-2	J3KSY6;Q8TCD5;J3KSX6;J3KRC4	3;3;2;2;1;1;1	3;3;2;2;1;1;1	3;3;2;2;1;1;1	71548000	0	0	5(3)-deoxyribonucleotidase, cytosolic type	NT5C	;;;	7	3	3	3	3	2	1	3	2	1	3	2	1	26.1	26.1	26.1	13.618	115	115;201;153;182;39;87;117	1	31	0.00027027	3.6882	26.1	18.3	7	698860000	100600000	15616000	20271000	1	1	0	8
J3KTA4;P17844;B4DLW8;J3KRZ1;J3QSF1;J3QRQ7;J3KRX8;J3QR02;J3QRN5;X6RLV5;J3QLG9;J3QR62	J3KTA4;P17844;B4DLW8	31;31;28;12;11;10;5;4;2;2;1;1	30;30;27;11;10;10;5;4;2;2;1;1	22;22;19;5;6;8;5;4;2;2;1;1	4250900000	4029300000	3708800000	Probable ATP-dependent RNA helicase DDX5	DDX5	;;	12	31	30	22	27	28	25	26	27	24	19	19	17	59.6	57.8	45.6	69.086	614	614;614;535;166;153;212;120;99;65;96;46;52	1	447	0	231.68	49.2	56.4	45.8	48982000000	4286200000	3877300000	3550900000	25	29	24	318
J3KTD2;C9JTR3;Q86VV8-2;Q86VV8-4;Q86VV8-3;Q86VV8	J3KTD2;C9JTR3;Q86VV8-2;Q86VV8-4;Q86VV8-3;Q86VV8	2;1;1;1;1;1	2;1;1;1;1;1	2;1;1;1;1;1	613280000	634230000	596790000	Rotatin	RTTN	;;;;;	6	2	2	2	2	2	2	2	2	2	2	2	2	3	3	3	56.318	500	500;1593;601;879;2200;2226	1	35	0.0065314	1.934	3	3	3	7417300000	615840000	604220000	607140000	1	1	2	12
J3KTL2;Q07955;Q07955-3;Q07955-2;J3KSR8;J3QQV5;J3KSW7	J3KTL2;Q07955;Q07955-3;Q07955-2	15;15;14;14;6;5;5	15;15;14;14;6;5;5	14;14;13;13;6;5;5	1381600000	1248100000	1346800000	Serine/arginine-rich splicing factor 1	SRSF1	;;;	7	15	15	14	15	15	14	15	15	14	14	14	13	49.8	49.8	47	28.329	253	253;248;201;292;143;65;73	1	227	0	70.516	49.8	49.8	49	16211000000	1625100000	1205600000	1402800000	21	15	18	201
J3KTL7;Q5QPR4;J3QR29;Q5QPR3;J3QKR5;J3QR44;P21127-6;P21127-9;Q9UQ88-4;P21127-8;Q9UQ88-3;Q9UQ88-2;P21127-3;P21127-2;Q9UQ88;P21127;J3QL65;Q9UQ88-10;P21127-12;P21127-4;P21127-5;P21127-10;Q9UQ88-5;Q9UQ88-9;X6R529;E9PFJ2;G8JLH1;J3KS35;E7ESP2	J3KTL7;Q5QPR4;J3QR29;Q5QPR3;J3QKR5;J3QR44;P21127-6;P21127-9;Q9UQ88-4;P21127-8;Q9UQ88-3;Q9UQ88-2;P21127-3;P21127-2;Q9UQ88;P21127;J3QL65;Q9UQ88-10;P21127-12;P21127-4;P21127-5;P21127-10;Q9UQ88-5;Q9UQ88-9	12;12;12;12;12;12;12;12;12;12;12;12;12;12;12;12;11;11;11;11;11;11;10;7;1;1;1;1;1	12;12;12;12;12;12;12;12;12;12;12;12;12;12;12;12;11;11;11;11;11;11;10;7;1;1;1;1;1	9;9;9;9;9;9;9;9;9;9;9;9;9;9;9;9;8;8;8;8;8;8;7;7;1;1;1;1;1	213310000	222640000	255920000	Cyclin-dependent kinase 11B;Cyclin-dependent kinase 11A	CDC2L1;CDK11A;CDK11B	;;;;;;;;;;;;;;;;;;;;;;;	29	12	12	9	9	12	10	9	12	10	8	9	8	19	19	12.5	85.243	738	738;746;772;779;783;785;738;748;770;772;779;780;781;782;783;795;618;439;439;461;526;565;397;531;75;151;232;407;420	1	117	0	27.184	14.2	19	14.9	2921700000	238730000	272380000	278930000	2	4	7	42
J3QK89;Q8IWX8	J3QK89;Q8IWX8	4;4	4;4	4;4	104300000	111940000	119960000	Calcium homeostasis endoplasmic reticulum protein	CHERP	;	2	4	4	4	4	4	4	4	4	4	4	4	4	5.8	5.8	5.8	104.93	927	927;916	1	67	0	17.126	5.8	5.8	5.8	1423600000	111160000	129630000	133940000	3	1	3	20
J3QK90;Q9UNZ2;Q9UNZ2-5;Q9UNZ2-4;F2Z2K0;Q9UNZ2-6;R4GNE6;G3V4V8;R4GMY2	J3QK90;Q9UNZ2;Q9UNZ2-5;Q9UNZ2-4;F2Z2K0;Q9UNZ2-6	16;16;16;15;11;11;3;1;1	16;16;16;15;11;11;3;1;1	16;16;16;15;11;11;3;1;1	413320000	411040000	381890000	NSFL1 cofactor p47	NSFL1C	;;;;;	9	16	16	16	13	11	12	13	11	12	13	11	12	58.9	58.9	58.9	40.844	372	372;370;372;339;274;259;105;35;71	1	162	0	78.737	48.4	42.2	46.2	5065500000	437180000	391370000	425710000	6	7	7	79
J3QL71;Q96FV2-2;Q96FV2;J3QQM9;J3QRJ1	J3QL71;Q96FV2-2;Q96FV2;J3QQM9	3;3;3;2;1	3;3;3;2;1	3;3;3;2;1	0	0	46683000	Secernin-2	SCRN2	;;;	5	3	3	3	1	1	2	1	1	2	1	1	2	12.9	12.9	12.9	47.493	433	433;378;425;269;271	1	21	0	9.3319	4.6	4.6	6.2	364640000	19561000	11892000	33447000	1	1	1	11
J3QLD9;E7EMK3;Q14254;K7EKW9	J3QLD9;E7EMK3;Q14254;K7EKW9	7;7;7;5	7;7;7;5	7;7;7;5	99498000	84916000	84047000	Flotillin-2	FLOT2	;;;	4	7	7	7	5	5	4	5	5	4	5	5	4	16.1	16.1	16.1	47.142	428	428;483;428;249	1	60	0	13.524	11.7	12.1	9.6	1232100000	113040000	107000000	89815000	2	2	1	27
J3QLE5;P14678-2;P63162;P14678;B3KVR1;P14678-3;J3KRY3;S4R3P3	J3QLE5;P14678-2;P63162;P14678;B3KVR1;P14678-3;J3KRY3;S4R3P3	8;8;8;8;8;8;5;5	8;8;8;8;8;8;5;5	8;8;8;8;8;8;5;5	1292000000	1192100000	1313700000	Small nuclear ribonucleoprotein-associated proteins B and B;Small nuclear ribonucleoprotein-associated protein N	SNRPN;SNRPB	;;;;;;;	8	8	8	8	8	8	8	8	8	8	8	8	8	35.5	35.5	35.5	17.546	169	169;231;240;240;244;289;59;70	1	163	0	52.125	35.5	35.5	35.5	14818000000	1343200000	1195800000	1505400000	10	7	11	109
J3QLR8;Q9Y3D9	J3QLR8;Q9Y3D9	5;5	5;5	5;5	67412000	53278000	61429000	28S ribosomal protein S23, mitochondrial	MRPS23	;	2	5	5	5	4	4	3	4	4	3	4	4	3	33.6	33.6	33.6	17.517	152	152;190	1	40	0	5.9897	27	27	17.8	679970000	66744000	47283000	50781000	2	0	0	7
J3QQ67;Q07020;G3V203;H0YHA7;Q07020-2;F8VYV2;F8VUA6;F8VXR6	J3QQ67;Q07020;G3V203;H0YHA7;Q07020-2;F8VYV2;F8VUA6	9;9;8;8;8;7;6;1	9;9;8;8;8;7;6;1	9;9;8;8;8;7;6;1	3780600000	4339300000	4207400000	60S ribosomal protein L18	RPL18	;;;;;;	8	9	9	9	8	9	9	8	9	9	8	9	9	42.1	42.1	42.1	21.728	190	190;188;164;167;159;133;130;84	1	171	0	76.999	41.6	42.1	42.1	49372000000	4001800000	3925900000	4049600000	8	8	8	93
J3QQS1;J3QLS3;Q9Y2R9;J3KSI8;J3QKW2	J3QQS1;J3QLS3;Q9Y2R9;J3KSI8;J3QKW2	4;4;4;3;3	4;4;4;3;3	4;4;4;3;3	45196000	0	35567000	28S ribosomal protein S7, mitochondrial	MRPS7	;;;;	5	4	4	4	2	3	3	2	3	3	2	3	3	29.1	29.1	29.1	19.903	172	172;271;242;156;183	1	25	0	5.7753	15.7	22.1	22.7	371820000	32410000	22114000	40257000	1	1	2	6
J3QQT2;J3KRX5;P18621;P18621-3;J3QLC8;P18621-2;J3QS96;J3KRB3;J3KSJ0	J3QQT2;J3KRX5;P18621;P18621-3;J3QLC8;P18621-2;J3QS96;J3KRB3	8;8;8;8;7;7;6;5;1	8;8;8;8;7;7;6;5;1	8;8;8;8;7;7;6;5;1	2304000000	2958700000	2656500000	60S ribosomal protein L17	RPL17	;;;;;;;	9	8	8	8	8	6	8	8	6	8	8	6	8	50.3	50.3	50.3	19.786	171	171;174;184;228;174;146;138;105;56	1	154	0	87.92	50.3	33.9	50.3	30859000000	2499300000	2693100000	2561400000	11	8	11	117
J3QR09;J3KTE4;P84098;J3QL15	J3QR09;J3KTE4;P84098	9;9;9;4	9;9;9;4	9;9;9;4	2823300000	2838700000	2735200000	Ribosomal protein L19;60S ribosomal protein L19	RPL19	;;	4	9	9	9	9	8	9	9	8	9	9	8	9	35.8	35.8	35.8	23.134	193	193;194;196;128	1	182	0	77.329	35.8	35.2	35.8	36388000000	3028800000	2770100000	2673300000	12	11	11	129
J3QRG6;P42771;P42771-4;K7ES20;G3XAG3;K7ENC6;P42771-2;P42771-3;P42772	J3QRG6;P42771;P42771-4;K7ES20;G3XAG3;K7ENC6;P42771-2;P42771-3	6;6;6;3;3;3;3;3;2	6;6;6;3;3;3;3;3;2	6;6;6;3;3;3;3;3;2	1101000000	952940000	1091600000	Cyclin-dependent kinase inhibitor 2A	CDKN2A	;;;;;;;	9	6	6	6	5	5	6	5	5	6	5	5	6	66.7	66.7	66.7	14.968	138	138;156;167;104;116;121;105;116;138	1	113	0	53.887	50.7	50.7	66.7	13039000000	1064700000	833140000	1077200000	6	3	7	71
J3QRS3;P19105;O14950;J3KTJ1	J3QRS3;P19105;O14950;J3KTJ1	8;8;8;4	8;8;8;4	3;3;3;0	1103000000	1039700000	1185500000	Myosin regulatory light chain 12A;Myosin regulatory light chain 12B	MYL12A;MYL12B	;;;	4	8	8	3	7	6	6	7	6	6	3	3	3	60.5	60.5	23.2	20.457	177	177;171;172;114	1	147	0	247.5	55.4	49.2	49.2	14219000000	1145400000	1005400000	1166100000	12	10	11	133
J3QRS9;X6R4W8;O43670-2;O43670;O43670-4;O43670-3;J3KS31;J3QS27;J3KTL1;J3KRB6;J3KRW6;H0Y3M2	J3QRS9;X6R4W8;O43670-2;O43670;O43670-4;O43670-3;J3KS31	5;5;5;5;5;4;3;1;1;1;1;1	5;5;5;5;5;4;3;1;1;1;1;1	5;5;5;5;5;4;3;1;1;1;1;1	447680000	388310000	391580000	BUB3-interacting and GLEBS motif-containing protein ZNF207	ZNF207	;;;;;;	12	5	5	5	4	5	4	4	5	4	4	5	4	10.8	10.8	10.8	52.541	493	493;497;463;478;494;395;341;46;74;93;95;198	1	53	0	17.753	9.1	10.8	8.3	4756600000	503460000	332570000	359050000	4	3	3	41
J3QRU4;F8WCA0;L7N2F9;P63027	J3QRU4;F8WCA0;L7N2F9;P63027	4;4;4;4	2;2;2;2	1;1;1;1	36845000	34736000	0	Vesicle-associated membrane protein 2	VAMP2	;;;	4	4	2	1	3	3	3	1	1	1	1	1	1	61.1	39.8	14.2	12.251	113	113;118;121;116	1	23	0.00026178	3.261	35.4	35.4	35.4	421520000	36526000	30983000	17379000	1	1	1	16
J3QRU8;Q9Y2X7;Q9Y2X7-3;J3QLH1;J3QQI0;F8W822;Q14161-2	J3QRU8;Q9Y2X7;Q9Y2X7-3	5;5;5;2;1;1;1	4;4;4;2;1;0;0	4;4;4;2;1;0;0	66082000	0	0	ARF GTPase-activating protein GIT1	GIT1	;;	7	5	4	4	4	2	3	3	2	2	3	2	2	10.8	9.7	9.7	76.805	694	694;761;770;228;149;421;471	1	22	0	22.93	9.5	4	5.2	322500000	61716000	10958000	17470000	1	1	1	10
J3QRZ2;J3QLB7;J3QKS6;J3QRG5;J3KSJ5;Q9BQA9-2;Q9BQA9;J3QKZ6;J3KTI1;J3KSB6;J3KS78;J3QS53;J3KTF4	J3QRZ2;J3QLB7;J3QKS6;J3QRG5;J3KSJ5;Q9BQA9-2;Q9BQA9;J3QKZ6;J3KTI1;J3KSB6;J3KS78;J3QS53;J3KTF4	2;2;2;2;2;2;2;1;1;1;1;1;1	2;2;2;2;2;2;2;1;1;1;1;1;1	2;2;2;2;2;2;2;1;1;1;1;1;1	36930000	48733000	40868000	Uncharacterized protein C17orf62	C17orf62	;;;;;;;;;;;;	13	2	2	2	2	2	2	2	2	2	2	2	2	18.8	18.8	18.8	13.235	117	117;119;130;148;190;173;187;51;78;78;80;85;88	1	25	0	4.0213	18.8	18.8	18.8	425030000	54127000	29475000	36305000	1	2	1	11
J3QS48;I3L295;J3KTK8;J3QQZ4;J3KT75;J3QW43;J3QRD5;B4DT74;O75352;I3L405;I3L261;I3L1D2;J3KSI4;I3L4E0	J3QS48;I3L295;J3KTK8;J3QQZ4;J3KT75;J3QW43;J3QRD5;B4DT74;O75352;I3L405;I3L261;I3L1D2	3;3;3;3;3;3;3;3;3;2;2;2;1;1	3;3;3;3;3;3;3;3;3;2;2;2;1;1	3;3;3;3;3;3;3;3;3;2;2;2;1;1	91028000	115040000	106290000	Mannose-P-dolichol utilization defect 1 protein	MPDU1	;;;;;;;;;;;	14	3	3	3	3	3	3	3	3	3	3	3	3	41.6	41.6	41.6	10.978	101	101;109;116;152;154;192;193;186;247;54;61;61;52;75	1	35	0	6.4381	41.6	41.6	41.6	1200700000	101970000	94152000	102150000	2	0	0	8
J3QTA2;Q99933-4;Q99933-3;Q99933;Q99933-2;C9JYK5;F1LLU6	J3QTA2;Q99933-4;Q99933-3;Q99933;Q99933-2	8;8;8;8;7;3;1	8;8;8;8;7;3;1	8;8;8;8;7;3;1	141470000	154040000	143830000	BAG family molecular chaperone regulator 1	BAG1	;;;;	7	8	8	8	7	5	5	7	5	5	7	5	5	30.4	30.4	30.4	38.76	345	345;230;274;345;311;150;160	1	75	0	33.503	28.1	18	20.3	1599000000	161130000	114310000	122520000	2	2	2	28
J9JID7;Q03252	J9JID7;Q03252	16;16	12;12	12;12	101430000	122670000	111620000	Lamin-B2	LMNB2	;	2	16	12	12	14	8	8	10	5	5	10	5	5	25.2	21.1	21.1	69.948	620	620;600	1	82	0	16.366	21.1	11.5	12.6	1333100000	103960000	96633000	80559000	5	1	1	33
J9JIE6;Q9UM00-2;Q9UM00;J3QQY2;J3KS45;J3KTQ7	J9JIE6;Q9UM00-2;Q9UM00;J3QQY2;J3KS45	4;4;4;3;2;1	4;4;4;3;2;1	4;4;4;3;2;1	571380000	555720000	607320000	Transmembrane and coiled-coil domain-containing protein 1	TMCO1	;;;;	6	4	4	4	4	4	4	4	4	4	4	4	4	19.2	19.2	19.2	27.079	239	239;169;188;104;143;152	1	60	0	41.184	19.2	19.2	19.2	6941800000	606790000	526960000	612470000	4	4	3	44
K4DI93;Q13620-1;Q13620;Q13620-3;A6NE76	K4DI93;Q13620-1;Q13620;Q13620-3	32;32;32;31;10	32;32;32;31;10	20;20;20;19;7	797630000	755610000	810240000	Cullin-4B	CUL4B	;;;	5	32	32	20	24	25	23	24	25	23	17	16	14	34	34	22.1	102.75	900	900;895;913;717;234	1	335	0	103.12	26.9	26.2	25.6	9547300000	718060000	716990000	724890000	12	15	11	166
K7EIE8;O95983-2;O95983	K7EIE8;O95983-2;O95983	3;3;3	3;3;3	3;3;3	0	0	28462000	Methyl-CpG-binding domain protein 3	MBD3	;;	3	3	3	3	2	1	2	2	1	2	2	1	2	16.6	16.6	16.6	26.322	235	235;259;291	1	23	0	7.7488	10.2	6.4	12.3	301410000	6564000	18995000	23336000	1	1	2	14
K7EIG1;O75153;I3L318;I3L4B5	K7EIG1;O75153	16;16;2;1	16;16;2;1	2;2;0;0	204240000	241480000	222710000	Clustered mitochondria protein homolog	CLUH	;	4	16	16	2	12	9	12	12	9	12	2	2	2	16.5	16.5	1.9	140.49	1251	1251;1309;164;160	1	130	0	25.392	11.1	8.2	11.9	2542400000	328570000	287870000	299250000	8	6	8	61
K7EJC8;E9PCW1;O95249;F6RU00;B4DQA8;G5E9T8;O95249-2	K7EJC8;E9PCW1;O95249;F6RU00;B4DQA8;G5E9T8;O95249-2	2;2;2;1;1;1;1	2;2;2;1;1;1;1	2;2;2;1;1;1;1	36128000	29745000	29914000	Golgi SNAP receptor complex member 1	GOSR1	;;;;;;	7	2	2	2	2	2	2	2	2	2	2	2	2	8.5	8.5	8.5	26.989	236	236;248;250;81;174;255;185	1	22	0.009957	1.6427	8.5	8.5	8.5	353850000	39573000	24560000	26380000	0	0	0	2
K7EJQ7;Q9BY50	K7EJQ7;Q9BY50	4;4	4;4	4;4	82022000	75951000	68565000	Signal peptidase complex catalytic subunit SEC11;Signal peptidase complex catalytic subunit SEC11C	SEC11C	;	2	4	4	4	2	4	4	2	4	4	2	4	4	24.2	24.2	24.2	18.095	161	161;192	1	33	0	8.5929	18.6	24.2	24.2	873720000	58029000	98049000	88049000	1	3	3	18
K7EKE6;K7EJE8;P36776-2;P36776;P36776-3;K7ER27;K7ERR6;K7ER56;K7EQF8	K7EKE6;K7EJE8;P36776-2;P36776;P36776-3	32;31;31;31;29;10;7;3;2	32;31;31;31;29;10;7;3;2	32;31;31;31;29;10;7;3;2	1117200000	1197800000	1188500000	Lon protease homolog, mitochondrial	LONP1	;;;;	9	32	32	32	22	23	23	22	23	23	22	23	23	52.2	52.2	52.2	95.179	845	845;829;895;959;763;242;264;210;185	1	338	0	136.99	38.5	39.8	39.1	14463000000	1042300000	1168600000	1083900000	12	14	14	178
K7EKI0;Q92817	K7EKI0;Q92817	3;3	3;3	3;3	22647000	15661000	19105000	Envoplakin	EVPL	;	2	3	3	3	3	3	3	3	3	3	3	3	3	1.5	1.5	1.5	233.83	2055	2055;2033	1	34	0.0036049	2.225	1.5	1.5	1.5	198670000	22328000	14954000	18773000	1	2	0	6
K7EKI8;O60437;K7EQ71	K7EKI8;O60437;K7EQ71	27;27;20	27;27;20	27;27;20	197390000	239320000	244150000	Periplakin	PPL	;;	3	27	27	27	15	19	15	15	19	15	15	19	15	17.6	17.6	17.6	204.49	1754	1754;1756;1115	1	186	0	45.38	10.4	12.4	9.4	2632100000	202570000	243330000	235590000	7	6	4	64
K7EKS6;U3KQB4;B9TWZ6;U3KQ43;Q9Y2X0-5;Q9Y2X0-4;Q9Y2X0-2;Q9Y2X0-3;Q9Y2X0	K7EKS6;U3KQB4;B9TWZ6;U3KQ43;Q9Y2X0-5;Q9Y2X0-4;Q9Y2X0-2;Q9Y2X0-3;Q9Y2X0	1;1;1;1;1;1;1;1;1	1;1;1;1;1;1;1;1;1	1;1;1;1;1;1;1;1;1	0	5102700	0	Mediator of RNA polymerase II transcription subunit 16	MED16	;;;;;;;;	9	1	1	1	1	1	0	1	1	0	1	1	0	2.4	2.4	2.4	51.45	462	462;505;537;663;663;751;841;860;877	1	2	0.0097572	1.6536	2.4	2.4	0	9352800	4672100	4680700	0	1	1	0	2
K7ELC2;P62841;K7EM56;K7EQJ5;K7EJ78;S4R456	K7ELC2;P62841;K7EM56;K7EQJ5;K7EJ78;S4R456	8;8;7;7;5;4	8;8;7;7;5;4	8;8;7;7;5;4	2458500000	2145800000	2156200000	40S ribosomal protein S15	RPS15	;;;;;	6	8	8	8	8	7	7	8	7	7	8	7	7	66.4	66.4	66.4	17.723	152	152;145;112;141;129;68	1	174	0	83.326	66.4	52	52	26983000000	2485700000	1982400000	1798800000	14	9	9	134
K7ELQ9;Q6UW68;K7EM09;K7EPR0;K7ER05;K7EJQ9	K7ELQ9;Q6UW68;K7EM09;K7EPR0	3;3;2;2;1;1	3;3;2;2;1;1	3;3;2;2;1;1	196790000	165870000	123140000	Transmembrane protein 205	TMEM205	;;;	6	3	3	3	2	3	2	2	3	2	2	3	2	22.9	22.9	22.9	19.27	170	170;189;120;128;88;107	1	37	0	21.258	15.3	22.9	15.3	1945000000	165760000	183530000	134310000	1	2	1	12
K7EM18;P41567;K7EQP2	K7EM18;P41567	9;9;1	9;9;1	4;4;0	618370000	659870000	565180000	Eukaryotic translation initiation factor 1	EIF1	;	3	9	9	4	9	7	8	9	7	8	4	2	3	71.9	71.9	38.8	13.607	121	121;113;53	1	108	0	211.48	71.9	71.1	71.9	7257900000	675520000	526950000	565050000	7	3	6	67
K7EM62;O95427	K7EM62;O95427	1;1	1;1	1;1	499640000	187020000	123200000	GPI ethanolamine phosphate transferase 1	PIGN	;	2	1	1	1	1	1	1	1	1	1	1	1	1	6.2	6.2	6.2	29.306	257	257;931	1	22	0.0024655	2.519	6.2	6.2	6.2	1605100000	370450000	225240000	198620000	2	1	0	8
K7EMV3;B4DEB1;K7EK07;K7ES00;Q71DI3;Q16695;P84243;P68431;K7EP01;Q5TEC6;Q6NXT2	K7EMV3;B4DEB1;K7EK07;K7ES00;Q71DI3;Q16695;P84243;P68431;K7EP01;Q5TEC6;Q6NXT2	3;3;3;3;3;3;3;3;2;2;2	3;3;3;3;3;3;3;3;2;2;2	3;3;3;3;3;3;3;3;2;2;2	1527400000	1451100000	2095900000	Histone H3;Histone H3.2;Histone H3.1t;Histone H3.3;Histone H3.1;Histone H3.3C	H3F3B;H3F3A;HIST2H3A;HIST3H3;HIST1H3A;HIST2H3PS2;H3F3C	;;;;;;;;;;	11	3	3	3	3	3	3	3	3	3	3	3	3	25	25	25	10.334	92	92;123;132;151;136;136;136;136;113;136;135	1	54	0	36.757	25	25	25	15794000000	1418200000	1484200000	2420700000	3	4	3	36
K7EMY9;K7EPM4;K7EQR7;D6W5Y5;Q14011;B4E2X2;K7ELV6;K7ENX8;K7EJV5;K7ELT6;K7ER40;K7EQX4;K7ENN6;K7EIF7;K7EQL0;K7ELL4;B3KT17	K7EMY9;K7EPM4;K7EQR7;D6W5Y5;Q14011;B4E2X2;K7ELV6;K7ENX8;K7EJV5;K7ELT6;K7ER40	3;3;3;3;3;3;2;2;2;2;2;1;1;1;1;1;1	3;3;3;3;3;3;2;2;2;2;2;1;1;1;1;1;1	3;3;3;3;3;3;2;2;2;2;2;1;1;1;1;1;1	28401000	39816000	33579000	Cold-inducible RNA-binding protein	CIRBP	;;;;;;;;;;	17	3	3	3	3	3	3	3	3	3	3	3	3	25.8	25.8	25.8	17.045	159	159;168;202;297;172;263;70;89;105;135;173;32;37;60;79;85;244	1	35	0	7.6846	25.8	25.8	25.8	479980000	38887000	32014000	27808000	3	1	1	15
K7ENB4;K7EKX7;K7EJ20;P36969-2;P36969;R4GNE4;K7ERP4	K7ENB4;K7EKX7;K7EJ20;P36969-2;P36969;R4GNE4;K7ERP4	4;4;4;4;4;3;3	4;4;4;4;4;3;3	4;4;4;4;4;3;3	68242000	91063000	73166000	Glutathione peroxidase;Phospholipid hydroperoxide glutathione peroxidase, mitochondrial	GPX4	;;;;;;	7	4	4	4	4	3	2	4	3	2	4	3	2	28.9	28.9	28.9	19.944	180	180;194;260;170;197;145;155	1	41	0	10.802	28.9	22.8	12.2	833380000	117360000	68633000	46133000	2	2	1	22
K7ENL2;K7EMC9;Q969T9;K7EIJ0;B4DFG2;A6NG10;K7EIN1;K7ESN4;K7EIK1	K7ENL2;K7EMC9;Q969T9;K7EIJ0;B4DFG2;A6NG10	4;4;4;3;3;3;1;1;1	4;4;4;3;3;3;1;1;1	4;4;4;3;3;3;1;1;1	91977000	0	0	WW domain-binding protein 2	WBP2	;;;;;	9	4	4	4	3	1	2	3	1	2	3	1	2	22.1	22.1	22.1	24.71	231	231;257;261;167;216;239;114;152;205	1	32	0	9.8638	22.1	4.3	8.7	835320000	92280000	4187800	17057000	1	0	1	12
K7ENL3;P40763;P40763-2;G8JLH9;K7EP08	K7ENL3;P40763;P40763-2;G8JLH9	24;24;23;19;3	24;24;23;19;3	24;24;23;19;3	1123000000	1206800000	1189500000	Signal transducer and activator of transcription 3;Signal transducer and activator of transcription	STAT3	;;;	5	24	24	24	21	20	19	21	20	19	21	20	19	51.9	51.9	51.9	83.125	722	722;770;769;672;84	1	359	0	321.62	46.3	43.8	40.3	15269000000	1089400000	1041400000	1138000000	21	15	19	215
K7ENL4;J3QL63;J3QL47;B4E0Q0;Q96ET8-3;J3KS67;C9JYS5;Q9NYZ1	K7ENL4;J3QL63;J3QL47;B4E0Q0;Q96ET8-3;J3KS67;C9JYS5;Q9NYZ1	1;1;1;1;1;1;1;1	1;1;1;1;1;1;1;1	1;1;1;1;1;1;1;1	19705000	0	0	Golgi apparatus membrane protein TVP23 homolog;Golgi apparatus membrane protein TVP23 homolog B	TVP23B;TVP23C	;;;;;;;	8	1	1	1	1	1	1	1	1	1	1	1	1	9.1	9.1	9.1	15.323	132	132;141;141;185;203;203;205;205	1	17	0.0074074	1.859	9.1	9.1	9.1	265160000	20845000	39094000	20200000	1	0	0	5
K7ENR6;V9GYH7;Q969U7;V9GZ55;K7ER45	K7ENR6;V9GYH7;Q969U7;V9GZ55	8;8;8;7;2	8;8;8;7;2	8;8;8;7;2	371380000	331610000	352130000	Proteasome assembly chaperone 2	PSMG2	;;;	5	8	8	8	8	7	7	8	7	7	8	7	7	28.3	28.3	28.3	26.696	240	240;233;264;209;98	1	111	0	20.691	28.3	27.9	27.9	4305100000	379370000	305350000	355690000	6	6	6	62
K7EQ02;Q96EP5-2;Q96EP5	K7EQ02;Q96EP5-2;Q96EP5	9;9;9	9;9;9	9;9;9	434220000	369660000	431480000	DAZ-associated protein 1	DAZAP1	;;	3	9	9	9	9	9	6	9	9	6	9	9	6	60.9	60.9	60.9	24.805	225	225;378;407	1	140	0	33.518	60.9	60.9	42.2	5061500000	421280000	379140000	298190000	4	7	5	57
K7EQ03;K7EP90;Q9BTD8-4;Q9BTD8-2;Q9BTD8-3;Q9BTD8;K7ER08	K7EQ03;K7EP90;Q9BTD8-4;Q9BTD8-2;Q9BTD8-3;Q9BTD8;K7ER08	4;4;4;4;4;4;3	4;4;4;4;4;4;3	4;4;4;4;4;4;3	72750000	81428000	72854000	RNA-binding protein 42	RBM42	;;;;;;	7	4	4	4	4	4	4	4	4	4	4	4	4	10.6	10.6	10.6	44.638	426	426;458;446;450;451;480;386	1	48	0	23.917	10.6	10.6	10.6	878200000	75145000	76334000	76444000	3	3	1	25
K7ER15;Q9H0R4;K7EMY7;Q9H0R4-2;K7EJQ8;K7ENF3;K7EQD2	K7ER15;Q9H0R4;K7EMY7;Q9H0R4-2	3;3;2;2;1;1;1	3;3;2;2;1;1;1	3;3;2;2;1;1;1	34601000	26834000	39847000	Haloacid dehalogenase-like hydrolase domain-containing protein 2	HDHD2	;;;	7	3	3	3	3	3	3	3	3	3	3	3	3	19.6	19.6	19.6	22.49	204	204;259;146;169;122;131;132	1	32	0	9.7303	19.6	19.6	19.6	363000000	34915000	30933000	42120000	2	2	3	25
K7ERC8;Q06136;K7EQS7;B4DMX0	K7ERC8;Q06136;K7EQS7;B4DMX0	4;4;2;2	4;4;2;2	4;4;2;2	0	0	114140000	3-ketodihydrosphingosine reductase	KDSR	;;;	4	4	4	4	1	2	2	1	2	2	1	2	2	29.1	29.1	29.1	22.62	203	203;332;155;268	1	28	0	9.5632	7.9	14.3	13.3	994100000	21124000	48405000	72156000	0	1	1	13
K7ERD8;Q15555-2;G5E9I6;Q15555-3;Q15555;K7EL66;Q15555-4;M0QX52;K7ENB3	K7ERD8;Q15555-2;G5E9I6;Q15555-3;Q15555;K7EL66;Q15555-4;M0QX52	8;8;8;8;8;7;7;5;2	8;8;8;8;8;7;7;5;2	7;7;7;7;7;6;6;4;1	201620000	181080000	166450000	Microtubule-associated protein RP/EB family member 2	MAPRE2	;;;;;;;	9	8	8	7	6	6	6	6	6	6	5	5	5	39.7	39.7	34.5	21.594	194	194;259;284;315;327;134;274;127;78	1	97	0	14.831	30.4	30.4	30.4	2156900000	153750000	165610000	198780000	5	1	2	35
K7ES61;Q9BYD3;X6RAY8;Q9BYD3-2;K7ELQ0;K7EKI4;K7ELF1;K7EJ73	K7ES61;Q9BYD3;X6RAY8;Q9BYD3-2;K7ELQ0;K7EKI4;K7ELF1	6;6;5;5;4;3;3;1	6;6;5;5;4;3;3;1	6;6;5;5;4;3;3;1	115230000	156240000	105700000	39S ribosomal protein L4, mitochondrial	MRPL4	;;;;;;	8	6	6	6	3	3	5	3	3	5	3	3	5	33.3	33.3	33.3	33.792	300	300;311;357;263;220;127;163;119	1	62	0	24.326	16	19.3	28	1426900000	73823000	144270000	96466000	4	3	1	39
K7ES92;F5H4A3;F5H1R4;K7ES98;K7EM85;Q92619;Q92619-2	K7ES92;F5H4A3;F5H1R4;K7ES98;K7EM85;Q92619;Q92619-2	3;3;3;3;3;3;3	3;3;3;3;3;3;3	3;3;3;3;3;3;3	80591000	114950000	70826000	Minor histocompatibility protein HA-1;Minor histocompatibility antigen HA-1	HMHA1	;;;;;;	7	3	3	3	2	3	2	2	3	2	2	3	2	4.2	4.2	4.2	84.622	771	771;1004;1019;1140;1163;1136;1152	1	32	0	4.4692	3	4.2	2.5	973760000	21077000	153860000	97941000	1	2	0	18
M0QWZ7;Q9NP81;E7EX87;M0R2C6;Q9NP81-2;M0R259;B4DJM9;M0QX29;M0R2H5;M0R1C0	M0QWZ7;Q9NP81;E7EX87;M0R2C6;Q9NP81-2;M0R259	12;12;10;10;10;6;5;4;2;1	12;12;10;10;10;6;5;4;2;1	12;12;10;10;10;6;5;4;2;1	162360000	149880000	161620000	Serine--tRNA ligase, mitochondrial	SARS2	;;;;;	10	12	12	12	7	9	10	7	9	10	7	9	10	33.4	33.4	33.4	58.182	518	518;518;518;588;520;328;236;187;135;90	1	111	0	57.889	19.1	25.5	27.4	1976900000	121770000	166090000	192460000	2	6	5	52
M0QX35;Q8N7H5;F8W9Q2;Q8N7H5-2;B4DGJ5	M0QX35;Q8N7H5;F8W9Q2;Q8N7H5-2;B4DGJ5	7;7;6;6;4	7;7;6;6;4	7;7;6;6;4	81041000	69681000	70031000	RNA polymerase II-associated factor 1 homolog	PAF1	;;;;	5	7	7	7	5	5	3	5	5	3	5	5	3	18.6	18.6	18.6	55.472	485	485;531;462;485;288	1	49	0	24.271	14.2	13.8	7.2	826650000	83314000	76545000	47558000	4	0	0	13
M0QXZ5;Q96B54	M0QXZ5;Q96B54	3;3	3;3	3;3	27951000	0	0	Zinc finger protein 428	ZNF428	;	2	3	3	3	2	2	2	2	2	2	2	2	2	19.3	19.3	19.3	23.568	218	218;188	1	14	0	5.8852	14.2	12.8	12.8	158860000	24192000	25099000	23032000	2	0	1	7
M0QY97;Q9UPT8	M0QY97;Q9UPT8	4;4	4;4	4;4	52121000	49860000	53193000	Zinc finger CCCH domain-containing protein 4	ZC3H4	;	2	4	4	4	3	2	4	3	2	4	3	2	4	10.5	10.5	10.5	95.425	910	910;1303	1	35	0	4.1779	8.2	6.2	10.5	578640000	46101000	38162000	58237000	0	1	1	12
M0QYA2;Q9NWS0;M0R2P8;M0R3A4;M0QXD5;M0R0J2;M0QYF4;Q9NWS0-3	M0QYA2;Q9NWS0;M0R2P8;M0R3A4;M0QXD5	4;4;2;2;2;1;1;1	4;4;2;2;2;1;1;1	3;3;2;2;1;0;0;0	63720000	76643000	70747000	PIH1 domain-containing protein 1	PIH1D1	;;;;	8	4	4	3	3	4	3	3	4	3	2	3	2	28.6	28.6	19.8	30.672	273	273;290;114;183;236;82;164;199	1	37	0	8.5752	23.4	28.6	23.4	836740000	64661000	86437000	83423000	0	2	0	12
M0QYH2;Q96T60;M0QX49;M0QYI1	M0QYH2;Q96T60	5;5;1;1	5;5;1;1	1;1;0;0	71004000	58001000	49623000	Bifunctional polynucleotide phosphatase/kinase;Polynucleotide 3-phosphatase;Polynucleotide 5-hydroxyl-kinase	PNKP	;	4	5	5	1	4	4	3	4	4	3	1	1	1	16.7	16.7	2.7	53.64	490	490;521;51;66	1	43	0	11.908	11.4	14.3	8	715840000	76406000	57655000	43867000	2	5	1	31
M0QYZ2;M0R0N4;P53680;X6R390;P53680-2;M0QZ21;M0R1S0	M0QYZ2;M0R0N4;P53680;X6R390;P53680-2;M0QZ21	7;6;6;5;5;4;2	7;6;6;5;5;4;2	7;6;6;5;5;4;2	197290000	242040000	190440000	AP-2 complex subunit sigma	AP2S1	;;;;;	7	7	7	7	6	6	6	6	6	6	6	6	6	44.3	44.3	44.3	18.929	158	158;144;142;156;104;122;92	1	65	0	9.2007	39.9	39.9	39.9	2514800000	179160000	234300000	210540000	5	4	2	36
M0QZ22;Q5PRF9;M0R0X3;M0QY61;M0QXV2	M0QZ22;Q5PRF9;M0R0X3	5;5;3;2;1	5;5;3;2;1	5;5;3;2;1	33532000	39174000	43733000	Protein Smaug homolog 2	SAMD4B	;;	5	5	5	5	5	3	3	5	3	3	5	3	3	12.6	12.6	12.6	75.292	692	692;694;325;219;75	1	44	0	4.8257	12.6	5.1	5.1	445340000	40916000	24745000	31034000	0	2	1	9
M0QZR4;Q92888;Q92888-3;Q92888-2;Q6NX52;M0QYC1;M0QYS3;M0QZH8;M0R2C7;M0R3H5	M0QZR4;Q92888;Q92888-3;Q92888-2;Q6NX52;M0QYC1	16;16;16;15;12;9;5;4;3;1	16;16;16;15;12;9;5;4;3;1	16;16;16;15;12;9;5;4;3;1	301730000	257800000	273160000	Rho guanine nucleotide exchange factor 1	ARHGEF1	;;;;;	10	16	16	16	12	11	11	12	11	11	12	11	11	19.6	19.6	19.6	108.32	968	968;912;927;879;948;702;307;275;291;88	1	175	0	83.67	15.6	12.9	13.6	3295100000	324390000	263920000	216000000	7	6	5	76
M0R0F0;P46782;M0R0R2;M0QZN2	M0R0F0;P46782;M0R0R2;M0QZN2	12;12;11;7	12;12;11;7	12;12;11;7	2746100000	2463900000	2660800000	40S ribosomal protein S5;40S ribosomal protein S5, N-terminally processed	RPS5	;;;	4	12	12	12	10	11	11	10	11	11	10	11	11	59	59	59	22.391	200	200;204;225;134	1	209	0	84.458	50	58.5	58.5	29780000000	2610500000	2483600000	2672100000	14	11	16	143
M0R0P9;Q0VAN0;P31751;J3QKW1;J3QL45;M0QZW8;M0R283;J3QLS6;C9JHS6;J3KTP4;G3V4I6;C9J258;J3QQM6;J3KSY8;G3V3K5;C9JC83;C9JIJ1;M0R275;J3KRI8;F6YBB4;A8MX96;E7EVP8;F8VS91;M0QZK3;Q9Y243-2;Q9Y243	M0R0P9;Q0VAN0;P31751;J3QKW1;J3QL45	6;6;6;4;3;2;2;2;2;1;1;1;1;1;1;1;1;1;1;1;1;1;1;1;1;1	6;6;6;4;3;2;2;2;2;1;1;1;1;1;1;1;1;1;1;1;1;1;1;1;1;1	4;4;4;3;2;1;2;1;1;0;0;0;0;0;0;0;0;1;0;0;0;0;0;0;0;0	0	66237000	61972000	RAC-beta serine/threonine-protein kinase	AKT2	;;;;	26	6	6	4	3	3	3	3	3	3	2	2	3	14	14	9.3	51.571	450	450;438;481;292;106;56;117;157;184;51;91;95;96;99;105;107;119;129;130;132;133;134;139;151;465;479	1	50	0	10.32	6.4	7.1	6.4	712070000	50291000	39759000	38050000	1	2	2	17
M0R116;P13637;P13637-2;P13637-3	M0R116;P13637;P13637-2;P13637-3	17;17;17;17	1;1;1;1	1;1;1;1	14978000	0	0	Sodium/potassium-transporting ATPase subunit alpha-3	ATP1A3	;;;	4	17	1	1	15	15	12	1	0	0	1	0	0	21.3	2.1	2.1	108.28	983	983;1013;1024;1026	1	1	0.0051838	2.0058	19.5	19	13.1	14978000	14978000	0	0	0	0	0	0
M0R165;Q9UBC2-3;Q9UBC2;Q9UBC2-2;Q9UBC2-4;M0R2S2;M0R1V5;M0QX30;M0R3I1;K7EJR2;M0R330	M0R165;Q9UBC2-3;Q9UBC2;Q9UBC2-2;Q9UBC2-4;M0R2S2	11;11;11;11;10;7;3;2;2;1;1	11;11;11;11;10;7;3;2;2;1;1	11;11;11;11;10;7;3;2;2;1;1	151180000	146000000	162970000	Epidermal growth factor receptor substrate 15-like 1	EPS15L1	;;;;;	11	11	11	11	9	7	6	9	7	6	9	7	6	21.7	21.7	21.7	83.474	756	756;754;864;910;601;447;110;90;213;79;83	1	96	0	22.686	16.1	11.4	8.5	1958300000	188640000	132080000	134790000	5	5	2	39
M0R174;O00754-2;O00754	M0R174;O00754-2;O00754	1;1;1	1;1;1	1;1;1	0	0	9424300	Lysosomal alpha-mannosidase;Lysosomal alpha-mannosidase A peptide;Lysosomal alpha-mannosidase B peptide;Lysosomal alpha-mannosidase C peptide;Lysosomal alpha-mannosidase D peptide;Lysosomal alpha-mannosidase E peptide	MAN2B1	;;	3	1	1	1	0	0	1	0	0	1	0	0	1	7.9	7.9	7.9	15.034	140	140;1010;1011	1	1	0.0069914	1.9181	0	0	7.9	9210900	0	0	9210900	0	0	1	1
M0R208;Q16740;M0QYV5	M0R208;Q16740	7;7;3	7;7;3	7;7;3	160200000	140960000	153690000	ATP-dependent Clp protease proteolytic subunit;ATP-dependent Clp protease proteolytic subunit, mitochondrial	CLPP	;	3	7	7	7	6	7	6	6	7	6	6	7	6	47.9	47.9	47.9	20.568	190	190;277;160	1	69	0	41.864	38.4	47.9	39.5	1824200000	135140000	169040000	176640000	2	1	5	34
M0R2A0;Q5UCC4-2;Q5UCC4	M0R2A0;Q5UCC4-2;Q5UCC4	3;3;3	3;3;3	3;3;3	94416000	94192000	85229000	ER membrane protein complex subunit 10	EMC10	;;	3	3	3	3	2	2	3	2	2	3	2	2	3	13.2	13.2	13.2	38.975	371	371;254;262	1	31	0	53.537	11.3	11.3	13.2	1077100000	69595000	63330000	111790000	2	3	3	27
M0R2B7;P28340;M0QZR8;M0QXE6;M0QZB4;M0QXQ2;M0R3H8	M0R2B7;P28340;M0QZR8	10;10;9;3;2;1;1	10;10;9;3;2;1;1	10;10;9;3;2;1;1	85219000	95141000	80435000	DNA polymerase;DNA polymerase delta catalytic subunit	POLD1	;;	7	10	10	10	9	5	7	9	5	7	9	5	7	11.9	11.9	11.9	126.39	1133	1133;1107;1009;289;188;291;397	1	78	0	30.615	11.3	5.6	8.5	1066100000	123250000	62063000	121790000	3	1	3	33
M0R3D4;Q9UI14;M0QXH1;M0R1H9	M0R3D4;Q9UI14;M0QXH1;M0R1H9	2;2;1;1	2;2;1;1	2;2;1;1	56666000	50481000	0	Prenylated Rab acceptor protein 1	RABAC1	;;;	4	2	2	2	2	2	1	2	2	1	2	2	1	19.2	19.2	19.2	17.056	151	151;185;109;149	1	21	0	20.243	19.2	19.2	9.3	535840000	57463000	54626000	20135000	2	1	1	14
O00116;B8ZZ81	O00116	23;5	23;5	23;5	897460000	995800000	982860000	Alkyldihydroxyacetonephosphate synthase, peroxisomal	AGPS		2	23	23	23	22	22	21	22	22	21	22	22	21	49.7	49.7	49.7	72.911	658	658;189	1	301	0	171.3	46	48.5	46.4	11724000000	1035800000	949090000	1020800000	16	13	13	158
O00139-2;O00139-1;O00139-5;O00139;O00139-4;D6R9M0;H0Y8H2;Q8N4N8	O00139-2;O00139-1;O00139-5;O00139;O00139-4	10;10;10;10;10;2;1;1	10;10;10;10;10;2;1;1	10;10;10;10;10;2;1;1	60889000	78002000	63001000	Kinesin-like protein KIF2A	KIF2A	;;;;	8	10	10	10	6	9	9	6	9	9	6	9	9	16.7	16.7	16.7	75.042	660	660;679;686;706;744;284;130;673	1	99	0	17.921	10.8	15.5	15	936440000	50735000	93052000	118240000	5	4	3	34
O00148;O00148-2;B1Q2N1;K7EQN7;K7EPJ3	O00148;O00148-2;B1Q2N1	21;14;11;10;7	9;5;3;3;2	9;5;3;3;2	898410000	875810000	932150000	ATP-dependent RNA helicase DDX39A	DDX39A	;;	5	21	9	9	19	20	19	8	8	7	8	8	7	57.6	27.2	27.2	49.129	427	427;322;267;255;189	1	157	0	119.45	52.2	52.5	52.2	10840000000	920680000	794390000	910780000	12	8	7	112
O00151	O00151	13	13	13	521000000	512410000	530490000	PDZ and LIM domain protein 1	PDLIM1		1	13	13	13	11	11	9	11	11	9	11	11	9	63.8	63.8	63.8	36.071	329	329	1	159	0	83.219	55.3	54.1	41.9	6707000000	640300000	404770000	476570000	4	10	6	95
O00154-4;O00154-6;O00154-7;O00154;O00154-5;B4DUX0;K7EKP8;O00154-2;O00154-3;F5GWE2;Q6ZUV0	O00154-4;O00154-6;O00154-7;O00154;O00154-5;B4DUX0;K7EKP8;O00154-2;O00154-3	14;13;13;13;12;11;10;9;9;5;1	14;13;13;13;12;11;10;9;9;5;1	14;13;13;13;12;11;10;9;9;5;1	764850000	907030000	877850000	Cytosolic acyl coenzyme A thioester hydrolase	ACOT7	;;;;;;;;	11	14	14	14	12	10	11	12	10	11	12	10	11	56.5	56.5	56.5	37.419	338	338;329;370;380;350;265;279;246;283;223;252	1	208	0	122.78	48.5	40.8	45	10628000000	871660000	830560000	852840000	8	8	9	109
O00165-5;O00165-3;O00165;O00165-2;E9PIQ7;Q5VYD6;O00165-4	O00165-5;O00165-3;O00165;O00165-2;E9PIQ7	4;4;4;3;2;1;1	4;4;4;3;2;1;1	4;4;4;3;2;1;1	0	0	76599000	HCLS1-associated protein X-1	HAX1	;;;;	7	4	4	4	3	2	3	3	2	3	3	2	3	28.6	28.6	28.6	26.099	231	231;253;279;287;151;255;124	1	33	0	4.3514	23.8	10	14.7	543120000	39945000	16562000	56553000	0	0	2	4
O00170;E9PMH2;V9GYQ3	O00170;E9PMH2	14;10;4	14;10;4	14;10;4	333790000	308730000	343110000	AH receptor-interacting protein	AIP	;	3	14	14	14	12	10	11	12	10	11	12	10	11	58.5	58.5	58.5	37.636	330	330;232;188	1	168	0	58.799	51.8	43.3	49.4	4258600000	390600000	271710000	358280000	11	4	5	87
O00178;F5H257;F5H716;B0QY59	O00178	7;1;1;1	7;1;1;1	7;1;1;1	63777000	75259000	0	GTP-binding protein 1	GTPBP1		4	7	7	7	6	3	3	6	3	3	6	3	3	17	17	17	72.453	669	669;86;152;349	1	54	0	25.098	14.9	6.6	5.5	917480000	86667000	62098000	57753000	3	1	0	24
O00186	O00186	11	11	11	271830000	217190000	261350000	Syntaxin-binding protein 3	STXBP3		1	11	11	11	11	9	11	11	9	11	11	9	11	26.7	26.7	26.7	67.764	592	592	1	148	0	25.501	26.7	18.1	26.7	3060200000	251870000	222250000	287300000	8	2	5	63
O00194;K7ES41;H3BU81;H3BUD9;H3BS49;H3BVH7;H3BN55;P51159-2;P51159	O00194	5;2;1;1;1;1;1;1;1	5;2;1;1;1;1;1;1;1	5;2;1;1;1;1;1;1;1	127780000	130310000	110240000	Ras-related protein Rab-27B	RAB27B		9	5	5	5	5	2	4	5	2	4	5	2	4	27.1	27.1	27.1	24.608	218	218;87;71;95;136;146;185;213;221	1	60	0	11.937	27.1	11	22	1628100000	159810000	93444000	97230000	3	1	1	17
O00203-3;O00203;Q13367;Q13367-4;Q13367-3;F5GYB0;H0YBD0;F5GWU4	O00203-3;O00203	23;23;4;4;3;1;1;1	23;23;4;4;3;1;1;1	23;23;4;4;3;1;1;1	478780000	500440000	522320000	AP-3 complex subunit beta-1	AP3B1	;	8	23	23	23	16	16	17	16	16	17	16	16	17	26.5	26.5	26.5	116.19	1045	1045;1094;1082;1101;1050;141;154;193	1	216	0	83.119	18.5	18.4	18.7	5948600000	403110000	305500000	414240000	7	7	5	88
O00231;O00231-2;J3QRY4;J3QS13;J3KSW3	O00231;O00231-2	22;21;7;5;1	22;21;7;5;1	22;21;7;5;1	2024700000	2044700000	1988700000	26S proteasome non-ATPase regulatory subunit 11	PSMD11	;	5	22	22	22	21	21	19	21	21	19	21	21	19	62.3	62.3	62.3	47.463	422	422;423;187;90;45	1	346	0	172.13	61.6	59.7	57.6	24851000000	2109100000	1796100000	1856200000	21	20	19	229
O00232;O00232-2;J3KTJ5;J3KSK1	O00232;O00232-2	23;21;1;1	23;21;1;1	23;21;1;1	1155400000	1095700000	1097800000	26S proteasome non-ATPase regulatory subunit 12	PSMD12	;	4	23	23	23	20	20	23	20	20	23	20	20	23	59.4	59.4	59.4	52.904	456	456;436;38;42	1	292	0	161.34	51.8	55.5	59.4	14140000000	1214900000	1066100000	1255500000	18	12	15	174
O00233;J3KN29;F5H5V4;F5GX23;F8W7V8;O00233-2;F5H7X1;O00233-3;F5H169	O00233;J3KN29;F5H5V4;F5GX23;F8W7V8;O00233-2;F5H7X1	7;6;5;5;5;5;4;3;2	7;6;5;5;5;5;4;3;2	7;6;5;5;5;5;4;3;2	246510000	288040000	300580000	26S proteasome non-ATPase regulatory subunit 9	PSMD9	;;;;;;	9	7	7	7	7	7	7	7	7	7	7	7	7	34.5	34.5	34.5	24.682	223	223;222;153;179;207;209;85;118;128	1	98	0	26.593	34.5	34.5	34.5	3391000000	247220000	317340000	343360000	2	4	4	43
O00264;O00264-2	O00264;O00264-2	7;4	6;4	6;4	701520000	559840000	499730000	Membrane-associated progesterone receptor component 1	PGRMC1	;	2	7	6	6	6	7	6	5	6	5	5	6	5	41.5	36.9	36.9	21.671	195	195;143	1	88	0	27.306	31.3	41.5	31.3	7370000000	632120000	559630000	552030000	2	5	4	54
O00267-2;O00267;M0QYL9	O00267-2;O00267	24;24;1	24;24;1	24;24;1	567730000	638730000	582240000	Transcription elongation factor SPT5	SUPT5H	;	3	24	24	24	19	19	21	19	19	21	19	19	21	31.4	31.4	31.4	120.5	1083	1083;1087;164	1	277	0	127.82	27.1	26.7	28.9	7202200000	569800000	542510000	662470000	13	9	13	150
O00273;O00273-2;K7ERT1	O00273;O00273-2	6;5;2	6;5;2	6;5;2	66612000	72679000	66274000	DNA fragmentation factor subunit alpha	DFFA	;	3	6	6	6	6	6	4	6	6	4	6	6	4	22.1	22.1	22.1	36.521	331	331;268;159	1	63	0	29.002	22.1	22.1	14.2	926720000	82389000	77850000	49084000	4	2	2	28
O00299	O00299	14	14	14	6128900000	6154900000	6476600000	Chloride intracellular channel protein 1	CLIC1		1	14	14	14	14	14	14	14	14	14	14	14	14	77.6	77.6	77.6	26.922	241	241	1	290	0	200.44	77.6	77.6	77.6	74872000000	5761800000	6159100000	6537300000	24	23	26	286
O00330-3;O00330;H0YD97;O00330-2;E9PLU0;E9PRI6	O00330-3;O00330;H0YD97;O00330-2	4;4;2;2;1;1	4;4;2;2;1;1	4;4;2;2;1;1	60281000	40828000	50294000	Pyruvate dehydrogenase protein X component, mitochondrial	PDHX	;;;	6	4	4	4	3	3	4	3	3	4	3	3	4	12.8	12.8	12.8	51.459	486	486;501;189;274;151;182	1	45	0	7.9362	6.6	6.6	12.8	633640000	48015000	33868000	52593000	2	2	3	27
O00399;E5RK00;E5RIK5;E5RGW9;E5RFU3	O00399;E5RK00	4;2;1;1;1	4;2;1;1;1	4;2;1;1;1	0	63897000	0	Dynactin subunit 6	DCTN6	;	5	4	4	4	1	2	1	1	2	1	1	2	1	26.8	26.8	26.8	20.747	190	190;170;37;46;73	1	27	0	7.8355	4.7	12.1	7.4	595080000	21433000	52510000	25956000	0	1	1	13
O00400;H7C562	O00400	3;1	3;1	3;1	0	0	24967000	Acetyl-coenzyme A transporter 1	SLC33A1		2	3	3	3	1	1	2	1	1	2	1	1	2	6.4	6.4	6.4	60.908	549	549;269	1	15	0	5.146	2.4	2.4	4.9	205340000	12914000	19100000	23421000	1	0	2	11
O00401	O00401	3	3	3	50010000	0	35429000	Neural Wiskott-Aldrich syndrome protein	WASL		1	3	3	3	3	1	3	3	1	3	3	1	3	11.5	11.5	11.5	54.826	505	505	1	27	0	6.9268	11.5	6.5	11.5	518550000	66827000	25893000	41611000	3	0	1	11
O00410;O00410-3;H0Y8C6;O00410-2;B4E0R6;E7ETV3;C9JMV5;E7EQT5;E7EV12;H0Y3V4;E7EWK4;E7EX05;C9JZD8;C9JQT6;E7ESA1;E7ESZ1;E7ETV8;C9JZ53;C9J875;C9JXE0	O00410;O00410-3;H0Y8C6;O00410-2;B4E0R6	48;48;46;43;40;10;9;8;8;8;6;6;5;5;5;5;5;4;3;2	48;48;46;43;40;10;9;8;8;8;6;6;5;5;5;5;5;4;3;2	46;46;44;41;38;10;9;8;8;8;6;6;5;5;5;5;5;4;3;2	4518400000	4282300000	4494400000	Importin-5	IPO5	;;;;	20	48	48	46	45	43	42	45	43	42	44	41	40	61.8	61.8	60.1	123.63	1097	1097;1115;1099;1037;972;170;165;126;142;182;117;119;74;88;98;106;128;77;75;64	1	800	0	323.31	56.5	51.3	52.5	54628000000	4960200000	4151800000	4060400000	52	42	41	520
O00411;K7EMH3	O00411	3;1	3;1	3;1	24175000	0	0	DNA-directed RNA polymerase, mitochondrial	POLRMT		2	3	3	3	2	1	1	2	1	1	2	1	1	3.5	3.5	3.5	138.62	1230	1230;349	1	17	0.0012604	2.7481	2.8	2	2	185600000	22533000	16436000	17252000	1	1	0	9
O00425;O00425-2;F8WD15	O00425	20;8;4	20;8;4	18;7;4	746550000	716980000	732600000	Insulin-like growth factor 2 mRNA-binding protein 3	IGF2BP3		3	20	20	18	16	18	15	16	18	15	14	16	13	42.7	42.7	38.7	63.704	579	579;198;81	1	251	0	151.29	34.5	38.7	33.9	9262100000	764170000	729710000	688690000	11	10	9	133
O00429-4;O00429-2;G8JLD5;O00429-5;O00429-3;O00429;O00429-8;O00429-6;O00429-7;F8VZ52;F8W1W3;B4DDQ3;B4DPZ9;F8VUJ9;F8VR28;F8VYL3;H0YHY4;H0YI79	O00429-4;O00429-2;G8JLD5;O00429-5;O00429-3;O00429;O00429-8;O00429-6;O00429-7	34;34;33;33;33;33;33;32;19;14;9;9;8;7;4;4;3;1	34;34;33;33;33;33;33;32;19;14;9;9;8;7;4;4;3;1	34;34;33;33;33;33;33;32;19;14;9;9;8;7;4;4;3;1	1221100000	975690000	1143300000	Dynamin-1-like protein	DNM1L	;;;;;;;;	18	34	34	34	29	26	27	29	26	27	29	26	27	61.7	61.7	61.7	78.099	699	699;725;712;710;710;736;738;749;533;261;168;180;156;172;97;117;54;48	1	424	0	212.95	55.2	44.6	48.9	13331000000	1205600000	960280000	1069100000	16	14	18	172
O00442;O00442-2;A6NIC1	O00442;O00442-2	10;9;1	10;9;1	10;9;1	186470000	195400000	211230000	RNA 3-terminal phosphate cyclase	RTCA	;	3	10	10	10	10	8	8	10	8	8	10	8	8	34.2	34.2	34.2	39.336	366	366;379;49	1	99	0	31.612	34.2	29.2	28.1	2456300000	190400000	185790000	268720000	5	2	5	37
O00461;F8W785	O00461;F8W785	7;6	7;6	7;6	163940000	117410000	146510000	Golgi integral membrane protein 4	GOLIM4	;	2	7	7	7	7	6	5	7	6	5	7	6	5	11.9	11.9	11.9	81.879	696	696;668	1	83	0	22.203	11.9	10.8	8.9	1619400000	200910000	104470000	132520000	4	3	2	33
O00468-6;O00468-3;O00468-7;O00468-5;O00468-4;O00468;O00468-2;H0Y5U1	O00468-6;O00468-3;O00468-7;O00468-5;O00468-4;O00468;O00468-2	13;12;12;11;11;11;10;1	13;12;12;11;11;11;10;1	13;12;12;11;11;11;10;1	93790000	79809000	104590000	Agrin;Agrin N-terminal 110 kDa subunit;Agrin C-terminal 110 kDa subunit;Agrin C-terminal 90 kDa fragment;Agrin C-terminal 22 kDa fragment	AGRN	;;;;;;	8	13	13	13	10	6	6	10	6	6	10	6	6	9.1	9.1	9.1	214.84	2045	2045;2049;2063;2057;2059;2067;1963;271	1	82	0	23.514	6.8	4	4	1152800000	134990000	93309000	102930000	5	3	1	33
O00469;O00469-2;E7ETU9;B3KWS3;C9JXZ0;F8WEW3	O00469;O00469-2;E7ETU9;B3KWS3	13;13;12;7;4;1	13;13;12;7;4;1	13;13;12;7;4;1	305360000	339080000	327130000	Procollagen-lysine,2-oxoglutarate 5-dioxygenase 2	PLOD2	;;;	6	13	13	13	12	12	12	12	12	12	12	12	12	21.3	21.3	21.3	84.685	737	737;758;703;418;229;98	1	181	0	44.012	20.1	20.1	20.1	4107800000	354220000	345660000	347910000	8	5	6	76
O00471	O00471	9	9	1	87075000	87324000	109130000	Exocyst complex component 5	EXOC5		1	9	9	1	6	6	7	6	6	7	0	0	1	18.1	18.1	2.1	81.852	708	708	1	69	0	18.567	12.3	11	11.3	1001400000	83262000	95924000	105570000	3	2	4	30
O00487	O00487	11	11	11	596690000	548200000	616720000	26S proteasome non-ATPase regulatory subunit 14	PSMD14		1	11	11	11	10	9	10	10	9	10	10	9	10	44.8	44.8	44.8	34.577	310	310	1	159	0	63.232	42.6	38.1	42.6	7447100000	532770000	500670000	595100000	7	8	8	96
O00499-9;O00499-10;O00499-7;O00499-8;O00499-4;O00499-6;O00499-11;O00499-3;O00499-2;O00499-5;O00499;S4R418;F5H0W4;F5H533;Q9UBW5-2;Q9UBW5;P49418-2;P49418	O00499-9;O00499-10;O00499-7;O00499-8;O00499-4;O00499-6;O00499-11;O00499-3;O00499-2;O00499-5;O00499	12;12;12;12;12;12;12;12;12;12;12;1;1;1;1;1;1;1	12;12;12;12;12;12;12;12;12;12;12;1;1;1;1;1;1;1	12;12;12;12;12;12;12;12;12;12;12;1;1;1;1;1;1;1	304280000	310480000	282790000	Myc box-dependent-interacting protein 1	BIN1	;;;;;;;;;;	18	12	12	12	11	11	8	11	11	8	11	11	8	45.5	45.5	45.5	45.563	409	409;424;439;454;475;482;497;506;518;550;593;531;539;653;533;565;653;695	1	131	0	50.903	43	41.8	30.6	3505100000	401670000	334780000	315450000	7	6	4	70
O00505;H0Y4S9	O00505	7;1	5;1	5;1	151760000	136710000	132760000	Importin subunit alpha-4	KPNA3		2	7	5	5	6	5	5	4	4	3	4	4	3	21.9	17.5	17.5	57.81	521	521;91	1	54	0	7.6595	17.1	14.4	10.7	1642900000	154980000	156090000	119580000	2	1	1	22
O00507;O00507-2	O00507;O00507-2	20;17	2;1	2;1	51128000	0	0	Probable ubiquitin carboxyl-terminal hydrolase FAF-Y	USP9Y	;	2	20	2	2	15	13	15	2	2	1	2	2	1	9.2	1.3	1.3	291.07	2555	2555;2070	1	16	0.0022272	2.5646	7.1	5.3	6.5	287770000	49599000	20480000	14788000	1	0	0	2
O00560;O00560-3;B4DHN5;E9PBU7	O00560;O00560-3;B4DHN5;E9PBU7	10;9;7;7	10;9;7;7	1;1;0;0	742970000	659610000	658490000	Syntenin-1	SDCBP	;;;	4	10	10	1	9	8	8	9	8	8	1	1	1	57.7	57.7	6	32.444	298	298;292;239;244	1	174	0	163.91	55.4	44	39.9	8669600000	720450000	581880000	663580000	13	8	6	123
O00571;O00571-2;B4E3C4;B4DLA0	O00571;O00571-2	34;33;7;5	34;33;7;5	10;9;3;4	3145300000	2738100000	2904800000	ATP-dependent RNA helicase DDX3X	DDX3X	;	4	34	34	10	32	34	32	32	34	32	10	10	8	60.4	60.4	19.3	73.243	662	662;646;308;139	1	593	0	308.89	56.6	60.4	53.9	39020000000	2970900000	2717300000	2826700000	26	25	19	309
O00622	O00622	6	6	6	123550000	124780000	112440000	Protein CYR61	CYR61		1	6	6	6	5	5	5	5	5	5	5	5	5	19.2	19.2	19.2	42.026	381	381	1	68	0	19.77	15.5	16.8	16.5	1652400000	106460000	98138000	123170000	0	2	0	18
O00625	O00625	10	10	10	607530000	699240000	690730000	Pirin	PIR		1	10	10	10	9	7	7	9	7	7	9	7	7	54.8	54.8	54.8	32.113	290	290	1	142	0	36.205	54.8	37.6	33.8	8664200000	451650000	408630000	717350000	8	4	5	70
O00629;H7C4F6	O00629	9;3	9;3	7;3	628960000	684820000	627480000	Importin subunit alpha-3	KPNA4		2	9	9	7	6	3	6	6	3	6	4	2	4	31.7	31.7	27.3	57.886	521	521;170	1	105	0	41.044	18.2	6.9	20.3	7845300000	457490000	174250000	379710000	5	2	4	66
O00743;O00743-2;O00743-3;B7Z3E2;Q5T1S7	O00743;O00743-2;O00743-3;B7Z3E2	12;11;11;7;2	12;11;11;7;2	12;11;11;7;2	333090000	298910000	351950000	Serine/threonine-protein phosphatase 6 catalytic subunit;Serine/threonine-protein phosphatase 6 catalytic subunit, N-terminally processed	PPP6C	;;;	5	12	12	12	11	11	10	11	11	10	11	11	10	48.5	48.5	48.5	35.144	305	305;283;342;158;125	1	141	0	84.145	45.9	45.9	43.6	4235500000	375230000	302830000	295120000	9	6	6	91
O00762;O00762-2;O00762-3;K4DI81;O00762-4	O00762;O00762-2;O00762-3	4;3;3;1;1	4;3;3;1;1	4;3;3;1;1	0	0	75336000	Ubiquitin-conjugating enzyme E2 C	UBE2C	;;	5	4	4	4	3	1	3	3	1	3	3	1	3	37.4	37.4	37.4	19.652	179	179;140;150;50;161	1	27	0	10.933	31.3	9.5	27.9	535700000	46592000	30191000	87305000	2	1	1	11
O00764;F2Z2Y4;O00764-3;O00764-2;A8MV33	O00764;F2Z2Y4;O00764-3;O00764-2	16;14;13;12;1	16;14;13;12;1	16;14;13;12;1	898090000	859850000	973310000	Pyridoxal kinase	PDXK	;;;	5	16	16	16	12	14	14	12	14	14	12	14	14	63.1	63.1	63.1	35.102	312	312;272;239;284;87	1	178	0	140.38	49.7	58.7	58.7	11091000000	926470000	941490000	1073200000	11	10	11	120
O00767	O00767	5	5	5	243590000	279620000	223860000	Acyl-CoA desaturase	SCD		1	5	5	5	4	3	3	4	3	3	4	3	3	17.8	17.8	17.8	41.522	359	359	1	56	0	12.102	17.8	14.2	14.2	2737400000	255130000	299780000	210130000	2	3	2	32
O14548;E5RJZ1;H0YBD2	O14548;E5RJZ1;H0YBD2	3;2;2	3;2;2	3;2;2	55378000	77355000	67560000	Cytochrome c oxidase subunit 7A-related protein, mitochondrial	COX7A2L	;;	3	3	3	3	3	3	2	3	3	2	3	3	2	48.2	48.2	48.2	12.615	114	114;79;95	1	32	0	7.4104	48.2	48.2	40.4	807560000	64723000	76378000	57852000	0	2	1	21
O14561;I3L505;H3BNK3	O14561;I3L505;H3BNK3	4;2;2	4;2;2	4;2;2	328280000	266770000	449020000	Acyl carrier protein, mitochondrial;Acyl carrier protein	NDUFAB1	;;	3	4	4	4	4	3	2	4	3	2	4	3	2	21.2	21.2	21.2	17.417	156	156;70;111	1	67	0	14.914	21.2	15.4	15.4	4292200000	303780000	305850000	398590000	2	4	3	33
O14579;M0QXB4;O14579-3;O14579-2;M0R061	O14579;M0QXB4;O14579-3;O14579-2;M0R061	10;9;8;8;5	10;9;8;8;5	10;9;8;8;5	751640000	685170000	678720000	Coatomer subunit epsilon	COPE	;;;;	5	10	10	10	10	10	10	10	10	10	10	10	10	44.5	44.5	44.5	34.482	308	308;331;256;257;146	1	190	0	160.78	44.5	44.5	44.5	9271000000	715340000	640950000	679680000	11	12	11	147
O14617-4;O14617;O14617-5;G5E988;O14617-2;E7EMM2;O14617-3;K7ELX8;K7ERW8	O14617-4;O14617;O14617-5;G5E988;O14617-2;E7EMM2;O14617-3	27;27;27;21;21;19;19;3;2	27;27;27;21;21;19;19;3;2	27;27;27;21;21;19;19;3;2	445360000	454350000	419640000	AP-3 complex subunit delta-1	AP3D1	;;;;;;	9	27	27	27	19	20	19	19	20	19	19	20	19	37.1	37.1	37.1	114.71	1021	1021;1153;1215;1112;1112;984;984;193;155	1	251	0	81.593	22.4	24.7	23.9	5301100000	453780000	427680000	406410000	9	9	8	123
O14646-2;O14646;H3BTW3	O14646-2;O14646	5;5;1	5;5;1	2;2;0	28776000	28310000	25192000	Chromodomain-helicase-DNA-binding protein 1	CHD1	;	3	5	5	2	4	3	4	4	3	4	1	0	1	3.2	3.2	1.3	196.59	1709	1709;1710;1098	1	37	0	6.0905	2.5	1.9	2.5	328240000	33096000	28259000	33751000	3	1	1	22
O14656;O14656-2	O14656;O14656-2	6;3	6;3	6;3	114990000	80869000	78382000	Torsin-1A	TOR1A	;	2	6	6	6	4	3	3	4	3	3	4	3	3	18.7	18.7	18.7	37.808	332	332;197	1	48	0	9.1733	11.7	11.7	10.5	1115200000	111270000	64787000	74176000	2	1	1	20
O14657;H0Y7C8	O14657;H0Y7C8	4;2	4;2	4;2	95812000	0	0	Torsin-1B	TOR1B	;	2	4	4	4	3	3	3	3	3	3	3	3	3	14.3	14.3	14.3	37.978	336	336;141	1	50	0	30.05	10.1	10.4	10.4	1813200000	103110000	50261000	63552000	3	1	0	17
O14672;H0YK87;C9J9B4;B4DU28	O14672	6;2;2;1	6;2;2;1	6;2;2;1	48541000	34930000	44905000	Disintegrin and metalloproteinase domain-containing protein 10	ADAM10		4	6	6	6	4	5	5	4	5	5	4	5	5	12.8	12.8	12.8	84.141	748	748;115;125;447	1	43	0	15.266	9.6	10.8	10.8	577960000	41277000	50091000	70565000	3	2	2	19
O14684	O14684	6	6	6	2022400000	1929300000	2106100000	Prostaglandin E synthase	PTGES		1	6	6	6	5	5	4	5	5	4	5	5	4	31.6	31.6	31.6	17.102	152	152	1	89	0	25.453	23.7	23.7	23	23015000000	2113800000	2034000000	1867500000	8	6	5	73
O14737;B4DE64;K7EQA1;K7ESJ4;Q3HM38;X6R2P6	O14737;B4DE64;K7EQA1	9;7;6;4;3;3	9;7;6;4;3;3	9;7;6;4;3;3	1064700000	929360000	896150000	Programmed cell death protein 5	PDCD5	;;	6	9	9	9	8	9	8	8	9	8	8	9	8	69.6	69.6	69.6	14.285	125	125;129;87;65;40;55	1	133	0	42.604	69.6	69.6	60.8	11649000000	1056300000	869550000	911060000	6	8	6	77
O14744-5;O14744;O14744-3;O14744-2;B4DV00;O14744-4;G3V580;H0YJX6;G3V2X6;C9JSX3;G3V5L5;G3V2L6;H0YJ77;H0YJD3;H7BZ44;G3V507;G3V2F5;G3V5T6	O14744-5;O14744;O14744-3;O14744-2;B4DV00;O14744-4	17;17;15;15;13;10;8;7;6;5;4;4;3;3;3;2;2;1	17;17;15;15;13;10;8;7;6;5;4;4;3;3;3;2;2;1	17;17;15;15;13;10;8;7;6;5;4;4;3;3;3;2;2;1	714780000	795840000	794460000	Protein arginine N-methyltransferase 5;Protein arginine N-methyltransferase 5, N-terminally processed;Protein arginine N-methyltransferase 5	PRMT5	;;;;;	18	17	17	17	14	14	14	14	14	14	14	14	14	43.3	43.3	43.3	67.673	593	593;637;576;620;531;466;180;279;185;186;169;183;138;177;179;42;86;104	1	214	0	91.35	35.1	33.4	33.4	9499100000	692740000	737760000	816870000	9	12	12	134
O14745;J3QRP6;B3KY21;J3QRA3	O14745;J3QRP6;B3KY21	14;9;8;1	14;9;8;1	14;9;8;1	675480000	779440000	815540000	Na(+)/H(+) exchange regulatory cofactor NHE-RF1	SLC9A3R1	;;	4	14	14	14	13	11	9	13	11	9	13	11	9	54.5	54.5	54.5	38.868	358	358;215;202;35	1	168	0	101.24	52.2	41.9	36.3	9128700000	1004700000	735020000	651280000	11	9	7	99
O14773;O14773-2;E7EV34	O14773;O14773-2	8;7;1	8;7;1	8;7;1	190220000	162110000	155180000	Tripeptidyl-peptidase 1	TPP1	;	3	8	8	8	6	6	5	6	6	5	6	6	5	19.5	19.5	19.5	61.247	563	563;320;177	1	74	0	14.436	15.3	15.3	14	2004700000	215460000	147410000	110580000	2	3	3	30
O14776-2;O14776;G3V220	O14776-2;O14776;G3V220	15;15;12	15;15;12	15;15;12	283110000	325780000	275610000	Transcription elongation regulator 1	TCERG1	;;	3	15	15	15	9	9	11	9	9	11	9	9	11	16.4	16.4	16.4	121.69	1077	1077;1098;1032	1	146	0	29.133	9.5	9.2	12.8	3706900000	226950000	230580000	256680000	5	4	6	75
O14818;O14818-2;H0Y586;O14818-4;Q8TAA3-2;Q8TAA3-5;Q8TAA3;F5GY34	O14818;O14818-2;H0Y586;O14818-4	16;9;8;8;5;5;5;2	16;9;8;8;5;5;5;2	16;9;8;8;5;5;5;2	3227400000	2922100000	2998900000	Proteasome subunit alpha type-7	PSMA7	;;;	8	16	16	16	15	14	14	15	14	14	15	14	14	67.3	67.3	67.3	27.887	248	248;178;187;149;212;250;256;63	1	285	0	214.42	66.9	66.9	66.9	36911000000	3262800000	2887000000	2872600000	17	15	15	191
O14828;O14828-2	O14828	7;3	7;3	7;3	447440000	530720000	469930000	Secretory carrier-associated membrane protein 3	SCAMP3		2	7	7	7	7	6	7	7	6	7	7	6	7	32.6	32.6	32.6	38.287	347	347;321	1	113	0	109.68	32.6	25.1	32.6	6161500000	504010000	555030000	496390000	6	3	5	51
O14879	O14879	25	25	25	6138700000	6045100000	6549800000	Interferon-induced protein with tetratricopeptide repeats 3	IFIT3		1	25	25	25	23	23	24	23	23	24	23	23	24	69	69	69	55.984	490	490	1	434	0	323.31	66.9	66.9	69	76941000000	6671800000	5513700000	6114000000	26	26	28	306
O14907	O14907	3	3	3	0	0	73287000	Tax1-binding protein 3	TAX1BP3		1	3	3	3	1	1	2	1	1	2	1	1	2	39.5	39.5	39.5	13.735	124	124	1	16	0	6.5342	13.7	13.7	25	439090000	33693000	30783000	76691000	0	0	0	6
O14908;O14908-2;K7EM11;K7ELJ2;K7ESN1	O14908;O14908-2;K7EM11	8;5;4;1;1	8;5;4;1;1	7;4;3;1;1	265100000	278590000	302840000	PDZ domain-containing protein GIPC1	GIPC1	;;	5	8	8	7	6	7	8	6	7	8	5	6	7	36.9	36.9	33.3	36.049	333	333;236;128;40;159	1	105	0	22.629	24.3	34.2	36.9	3320100000	261840000	292400000	243450000	3	4	4	42
O14929;O14929-2;F8W9G7;F8WEW1	O14929;O14929-2	15;11;3;2	15;11;3;2	15;11;3;2	445620000	483860000	462520000	Histone acetyltransferase type B catalytic subunit	HAT1	;	4	15	15	15	13	12	11	13	12	11	13	12	11	59.7	59.7	59.7	49.512	419	419;334;125;46	1	152	0	133.65	55.1	47.7	39.4	5654700000	521760000	480380000	405400000	9	9	8	90
O14933;O14933-2;E9PQT7;E9PKW8	O14933;O14933-2	6;4;2;1	6;4;2;1	6;4;2;1	204090000	257720000	180700000	Ubiquitin/ISG15-conjugating enzyme E2 L6	UBE2L6	;	4	6	6	6	6	5	5	6	5	5	6	5	5	49	49	49	17.769	153	153;87;127;65	1	94	0	45.832	49	48.4	37.3	3393700000	216970000	234370000	201030000	4	6	3	48
O14949	O14949	5	5	5	235570000	239080000	235680000	Cytochrome b-c1 complex subunit 8	UQCRQ		1	5	5	5	4	5	3	4	5	3	4	5	3	54.9	54.9	54.9	9.9062	82	82	1	54	0	8.3832	45.1	54.9	26.8	2815800000	251120000	254920000	184860000	3	4	2	32
O14964;O14964-2;I3L1P5;I3L2H4;I3L165;I3L1E3	O14964;O14964-2;I3L1P5	8;7;5;2;2;2	8;7;5;2;2;2	8;7;5;2;2;2	218400000	212370000	222380000	Hepatocyte growth factor-regulated tyrosine kinase substrate	HGS	;;	6	8	8	8	8	6	7	8	6	7	8	6	7	12	12	12	86.191	777	777;690;263;59;71;292	1	91	0	21.236	12	7.7	11.1	2427800000	248890000	132220000	182330000	4	2	3	46
O14967;D6RAZ4	O14967	11;4	11;4	11;4	198610000	207880000	201240000	Calmegin	CLGN		2	11	11	11	9	7	8	9	7	8	9	7	8	30.7	30.7	30.7	70.038	610	610;179	1	100	0	42.895	25.4	17.4	20.7	2514000000	220170000	185300000	183230000	5	1	2	40
O14974;O14974-4;O14974-5;O14974-3;O14974-2;F8VZN8;H0YHI8;H0YIS3;H0YIS4;H0YIM2;H0YHL8;F8VW28;H0YIL7	O14974;O14974-4;O14974-5;O14974-3;O14974-2;F8VZN8	17;16;15;15;15;11;7;5;5;4;2;1;1	17;16;15;15;15;11;7;5;5;4;2;1;1	17;16;15;15;15;11;7;5;5;4;2;1;1	259000000	252840000	241480000	Protein phosphatase 1 regulatory subunit 12A	PPP1R12A	;;;;;	13	17	17	17	14	15	13	14	15	13	14	15	13	20.6	20.6	20.6	115.28	1030	1030;971;943;974;995;692;367;234;299;188;210;97;161	1	156	0	32.374	17.3	18.5	15	3113100000	281100000	270640000	267110000	8	5	3	48
O14976-2;O14976;D6RAW3;H0Y8H5	O14976-2;O14976	6;6;2;1	6;6;2;1	6;6;2;1	30177000	38798000	34465000	Cyclin-G-associated kinase	GAK	;	4	6	6	6	4	3	3	4	3	3	4	3	3	6.7	6.7	6.7	134.46	1232	1232;1311;138;467	1	39	0	10.841	4.3	3	3	406500000	41986000	32610000	30361000	2	1	0	14
O14979-3;O14979-2;O14979	O14979-3;O14979-2;O14979	9;9;8	8;8;7	8;8;7	331050000	481550000	394710000	Heterogeneous nuclear ribonucleoprotein D-like	HNRNPDL	;;	3	9	8	8	8	6	8	7	5	7	7	5	7	40.2	36.9	36.9	27.191	244	244;301;420	1	98	0	64.364	39.8	33.2	39.8	4659800000	410400000	387940000	425510000	4	5	4	61
O14980;C9JKM9;C9J673;C9IZS4;C9JQ02;C9JV99;F8WF71;C9IYM2;H7BZC5;C9JF49	O14980	40;11;9;6;6;6;5;4;4;3	40;11;9;6;6;6;5;4;4;3	40;11;9;6;6;6;5;4;4;3	3478900000	3601300000	3458000000	Exportin-1	XPO1		10	40	40	40	39	36	37	39	36	37	39	36	37	47.2	47.2	47.2	123.38	1071	1071;179;132;94;95;100;82;62;72;59	1	719	0	323.31	45.8	41.9	42.7	44845000000	3648900000	3340900000	3350400000	42	43	38	484
O14981	O14981	2	2	2	15250000	0	0	TATA-binding protein-associated factor 172	BTAF1		1	2	2	2	2	2	1	2	2	1	2	2	1	1.8	1.8	1.8	206.89	1849	1849	1	13	0	4.8275	1.8	1.8	1.1	107860000	14715000	18803000	10254000	1	0	0	4
O15031;E2PU09;A6QRG9;A6QRH1;H0Y7X5;H0Y6J7;H0YAM9;F5H3A2;B4DHQ7;O60486;Q9Y4D7	O15031	32;7;5;2;1;1;1;1;1;1;1	32;7;5;2;1;1;1;1;1;1;1	32;7;5;2;1;1;1;1;1;1;1	456040000	490430000	452610000	Plexin-B2	PLXNB2		11	32	32	32	24	24	25	24	24	25	24	24	25	26.6	26.6	26.6	205.12	1838	1838;477;234;161;84;189;231;307;615;1568;1925	1	321	0	110.74	18.7	18.8	20.3	5930300000	436650000	460310000	516010000	17	11	11	163
O15042-2;O15042;E7ET15;O15042-3;C9JB80;E7EW00;H0Y8D9;U3KPT1;C9JDJ7;C9J5L1;H7C4V2;H7C4P4	O15042-2;O15042;E7ET15;O15042-3;C9JB80	9;9;8;6;5;3;3;2;2;2;2;1	9;9;8;6;5;3;3;2;2;2;2;1	9;9;8;6;5;3;3;2;2;2;2;1	335110000	372740000	411490000	U2 snRNP-associated SURP motif-containing protein	U2SURP	;;;;	12	9	9	9	5	7	7	5	7	7	5	7	7	10.3	10.3	10.3	118.23	1028	1028;1029;1028;620;487;425;439;125;130;161;290;94	1	106	0	19.298	5.3	7.4	7.4	4523900000	448800000	534730000	560120000	3	6	7	49
O15066;H3BTL6;F8WAR6;B7Z896;F8WER6;F5H3M2;F5H4I9;B4DSR5;Q9BVG8-5;O14782;Q9BVG8-2;Q9BVG8;B7Z484;Q9P2E2-3;Q9P2E2	O15066	3;1;1;1;1;1;1;1;1;1;1;1;1;1;1	3;1;1;1;1;1;1;1;1;1;1;1;1;1;1	2;1;1;1;1;1;1;1;1;1;1;1;1;1;1	63640000	0	0	Kinesin-like protein KIF3B;Kinesin-like protein KIF3B, N-terminally processed	KIF3B		15	3	3	2	2	1	1	2	1	1	1	1	0	4.8	4.8	3.1	85.124	747	747;280;672;684;685;724;768;373;687;793;826;833;848;1028;1029	1	17	0.0040399	2.1058	3.3	1.6	1.7	418670000	14112000	20717000	4009000	2	1	0	4
O15067;F5GWT9;H0YGH1;J3KT98;J3QSG0;J3QSH6;J3KTL4;J3KTQ5;J3QL39	O15067;F5GWT9	28;17;4;3;3;3;2;1;1	28;17;4;3;3;3;2;1;1	28;17;4;3;3;3;2;1;1	676700000	645690000	586540000	Phosphoribosylformylglycinamidine synthase	PFAS	;	9	28	28	28	19	18	17	19	18	17	19	18	17	32.1	32.1	32.1	144.73	1338	1338;914;385;116;131;135;103;62;87	1	277	0	160.83	20.9	21.4	15.5	8197300000	677620000	473430000	533740000	14	9	9	134
O15084-2;O15084;O15084-4;O15084-1;B4DIW9;H7C4A0;F5H682;H7C209;H7BXV4	O15084-2;O15084;O15084-4;O15084-1;B4DIW9	4;4;4;4;3;1;1;1;1	4;4;4;4;3;1;1;1;1	3;3;3;3;2;0;0;0;0	12397000	0	0	Serine/threonine-protein phosphatase 6 regulatory ankyrin repeat subunit A	ANKRD28	;;;;	9	4	4	3	2	0	0	2	0	0	2	0	0	6.8	6.8	4.7	96.16	899	899;1053;1083;1086;722;316;507;791;919	1	9	0.0022288	2.5725	3.4	0	0	63122000	12234000	0	0	1	0	0	5
O15091-4;O15091-2;O15091;O15091-3	O15091-4;O15091-2;O15091	3;3;3;1	3;3;3;1	3;3;3;1	26795000	31094000	24883000	Mitochondrial ribonuclease P protein 3	KIAA0391	;;	4	3	3	3	3	2	2	3	2	2	3	2	2	7	7	7	56.486	488	488;567;583;211	1	31	0	4.9118	7	4.1	4.7	340080000	28544000	21557000	19121000	2	1	1	15
O15116;E5RJ47;E5RH18	O15116;E5RJ47;E5RH18	2;1;1	2;1;1	2;1;1	106260000	101470000	119500000	U6 snRNA-associated Sm-like protein LSm1	LSM1	;;	3	2	2	2	2	2	2	2	2	2	2	2	2	17.3	17.3	17.3	15.179	133	133;44;44	1	27	0	5.2561	17.3	17.3	17.3	1276600000	98744000	90857000	116820000	1	0	1	13
O15118;K7EQ23;B4DET3	O15118;K7EQ23;B4DET3	11;7;7	11;7;7	11;7;7	423560000	448210000	435900000	Niemann-Pick C1 protein	NPC1	;;	3	11	11	11	11	10	8	11	10	8	11	10	8	11.9	11.9	11.9	142.17	1278	1278;971;960	1	156	0	79.244	11.9	11.1	9.4	5353100000	424740000	510960000	458630000	7	6	7	84
O15121;E7EMA0	O15121	4;1	4;1	4;1	130100000	127890000	113750000	Sphingolipid delta(4)-desaturase DES1	DEGS1		2	4	4	4	4	3	4	4	3	4	4	3	4	17	17	17	37.866	323	323;261	1	61	0	27.864	17	14.9	17	1679500000	118460000	146620000	109110000	3	3	3	30
O15127;H3BV04;H3BN93;H3BUB6;H3BPL9	O15127;H3BV04;H3BN93;H3BUB6;H3BPL9	2;1;1;1;1	2;1;1;1;1	2;1;1;1;1	60789000	92576000	79771000	Secretory carrier-associated membrane protein 2	SCAMP2	;;;;	5	2	2	2	2	2	2	2	2	2	2	2	2	9.7	9.7	9.7	36.648	329	329;194;236;254;278	1	45	0	16.637	9.7	9.7	9.7	857400000	68104000	100690000	111260000	2	2	2	23
O15143;C9J4Z7;F8VXW2;C9JEY1;C9JQM8;C9JFG9;C9J6C8;C9JBJ7;C9K057;C9JTT6;C9JM51;F8WEB3	O15143	15;6;6;6;6;6;6;5;5;4;1;1	15;6;6;6;6;6;6;5;5;4;1;1	14;6;6;6;6;6;6;5;5;4;1;1	1470900000	1411600000	1328800000	Actin-related protein 2/3 complex subunit 1B	ARPC1B		12	15	15	14	14	13	14	14	13	14	13	13	13	48.7	48.7	42.5	40.949	372	372;128;130;130;132;132;132;102;108;82;21;32	1	280	0	133.33	46.5	40.3	48.4	16921000000	1437100000	1076200000	1295400000	17	12	13	191
O15144;C9JTV5;G5E9J0;H7C3F9;G5E9S7	O15144	17;6;6;4;2	17;6;6;4;2	17;6;6;4;2	1479000000	1595600000	1656700000	Actin-related protein 2/3 complex subunit 2	ARPC2		5	17	17	17	15	14	12	15	14	12	15	14	12	67.7	67.7	67.7	34.333	300	300;89;91;165;38	1	285	0	77.981	47	55	41.3	20376000000	1373300000	1564600000	1694100000	12	16	16	175
O15145;C9JZD1;F8VR50	O15145;C9JZD1	8;4;3	8;4;3	8;4;3	605910000	648530000	722960000	Actin-related protein 2/3 complex subunit 3	ARPC3	;	3	8	8	8	8	6	6	8	6	6	8	6	6	42.7	42.7	42.7	20.546	178	178;99;84	1	122	0	35.487	42.7	34.8	34.8	7998100000	930760000	507450000	635850000	8	6	4	72
O15160-2;O15160;E7EQB9;D6RDJ3;H0Y723	O15160-2;O15160;E7EQB9	5;5;4;2;1	5;5;4;2;1	5;5;4;2;1	49947000	56986000	65335000	DNA-directed RNA polymerases I and III subunit RPAC1	POLR1C	;;	5	5	5	5	4	4	3	4	4	3	4	4	3	24.9	24.9	24.9	38.646	342	342;346;296;124;140	1	46	0	23.655	19	18.7	13.5	624310000	62120000	82333000	47156000	0	1	2	13
O15173;O15173-2;U3KQM0;D3DNX8	O15173;O15173-2;U3KQM0	10;10;5;1	10;10;5;1	9;9;4;1	844950000	746490000	851930000	Membrane-associated progesterone receptor component 2	PGRMC2	;;	4	10	10	9	10	10	9	10	10	9	9	9	8	39.5	39.5	39.5	23.818	223	223;247;91;44	1	151	0	113.08	39.5	39.5	39.5	9675900000	960970000	768540000	843270000	11	6	8	81
O15212;A2AB88	O15212;A2AB88	10;7	10;7	10;7	792330000	786630000	771670000	Prefoldin subunit 6	PFDN6	;	2	10	10	10	8	9	9	8	9	9	8	9	9	55	55	55	14.582	129	129;103	1	154	0	78.274	55	55	55	9525900000	700930000	712380000	791240000	8	7	8	91
O15258;Q5T093;Q5T092;Q5T091	O15258;Q5T093;Q5T092;Q5T091	4;3;3;3	4;3;3;3	4;3;3;3	264830000	271180000	266430000	Protein RER1	RER1	;;;	4	4	4	4	3	4	4	3	4	4	3	4	4	19.4	19.4	19.4	22.958	196	196;117;158;187	1	78	0	15.64	13.8	19.4	19.4	3349300000	237350000	227600000	303150000	3	4	4	43
O15269;O15269-2	O15269	10;3	10;3	10;3	125270000	89979000	77401000	Serine palmitoyltransferase 1	SPTLC1		2	10	10	10	6	5	5	6	5	5	6	5	5	26	26	26	52.743	473	473;143	1	71	0	20.019	15.6	12.5	10.8	1244800000	104370000	94249000	57544000	3	1	1	22
O15270;H0YJV2	O15270	3;1	3;1	3;1	18737000	0	0	Serine palmitoyltransferase 2	SPTLC2		2	3	3	3	2	1	2	2	1	2	2	1	2	7.5	7.5	7.5	62.924	562	562;407	1	20	0	10.338	5.5	3.2	5.5	183180000	18610000	10187000	20693000	1	1	0	6
O15294;O15294-3;O15294-2;O15294-4;C9JZL3;H7C2T7	O15294;O15294-3;O15294-2;O15294-4	17;15;12;9;4;2	17;15;12;9;4;2	17;15;12;9;4;2	313970000	273940000	299530000	UDP-N-acetylglucosamine--peptide N-acetylglucosaminyltransferase 110 kDa subunit	OGT	;;;	6	17	17	17	12	13	14	12	13	14	12	13	14	21.9	21.9	21.9	116.92	1046	1046;1036;920;665;156;211	1	164	0	57.034	15.3	16.6	19	3510200000	348910000	301020000	497460000	6	4	4	41
O15305;H3BRM0;H3BV55;B7Z6R0;H3BR08;H3BM92;H3BV34;H3BT06;H3BNY9;H3BPH4;B7Z419;F5H0W0	O15305;H3BRM0;H3BV55;B7Z6R0;H3BR08;H3BM92;H3BV34;H3BT06;H3BNY9;H3BPH4	4;3;3;3;2;2;2;2;2;2;1;1	4;3;3;3;2;2;2;2;2;2;1;1	4;3;3;3;2;2;2;2;2;2;1;1	151850000	198920000	167470000	Phosphomannomutase 2;Phosphomannomutase	PMM2	;;;;;;;;;	12	4	4	4	3	4	4	3	4	4	3	4	4	22.8	22.8	22.8	28.082	246	246;155;219;119;65;66;70;90;91;142;121;163	1	50	0	24.615	18.3	22.8	22.8	2037100000	103210000	218930000	179900000	4	4	3	43
O15355	O15355	16	16	16	535580000	698070000	639450000	Protein phosphatase 1G	PPM1G		1	16	16	16	14	12	13	14	12	13	14	12	13	43.4	43.4	43.4	59.271	546	546	1	176	0	64.139	40.7	31.3	33.9	7364800000	645410000	658440000	626520000	9	8	9	99
O15357;O15357-2;F5GY16;H7BXR2;F5H588;H0YFZ4;F5GXI6;H0Y5Q9;H7C2V3;H7C292;Q92835-3;Q92835-2;Q92835	O15357;O15357-2	38;33;6;3;1;1;1;1;1;1;1;1;1	38;33;6;3;1;1;1;1;1;1;1;1;1	38;33;6;3;1;1;1;1;1;1;1;1;1	1085300000	1111000000	1095400000	Phosphatidylinositol 3,4,5-trisphosphate 5-phosphatase 2	INPPL1	;	13	38	38	38	28	31	32	28	31	32	28	31	32	38.4	38.4	38.4	138.6	1258	1258;1016;127;149;33;197;596;810;941;941;976;1188;1189	1	453	0	194.53	29.2	29.6	30.4	13567000000	1114400000	1075100000	992220000	19	14	21	222
O15371;B4DVY1;B0QYA5;B0QYA6;B0QYA7;B0QYA4;B0QYA8	O15371;B4DVY1;B0QYA5	20;19;10;5;4;3;3	20;19;10;5;4;3;3	20;19;10;5;4;3;3	1114400000	1309100000	1304800000	Eukaryotic translation initiation factor 3 subunit D	EIF3D	;;	7	20	20	20	18	13	18	18	13	18	18	13	18	60	60	60	63.972	548	548;499;269;173;186;105;123	1	261	0	224.53	54	37.2	53.8	15947000000	1178000000	1254900000	1364400000	16	10	14	169
O15382;B3KSI3;M0QXF9;M0QZ10;O15382-2;M0QZP4;M0R2K7	O15382;B3KSI3;M0QXF9;M0QZ10;O15382-2;M0QZP4	12;11;11;10;10;8;2	12;11;11;10;10;8;2	12;11;11;10;10;8;2	209080000	248330000	215630000	Branched-chain-amino-acid aminotransferase, mitochondrial;Branched-chain-amino-acid aminotransferase	BCAT2	;;;;;	7	12	12	12	12	10	8	12	10	8	12	10	8	42.9	42.9	42.9	44.287	392	392;352;445;405;300;313;108	1	123	0	43.707	42.9	36.7	27.8	2591700000	251600000	263420000	196020000	7	6	5	56
O15397;O15397-2;F5H244;F5H2I3;H0YH64	O15397;O15397-2	13;10;3;2;1	12;9;3;2;1	12;9;3;2;1	142830000	153680000	147300000	Importin-8	IPO8	;	5	13	12	12	12	11	8	11	10	7	11	10	7	14.6	13.6	13.6	119.94	1037	1037;832;167;46;167	1	114	0	34.044	13.4	12.3	9.2	1987100000	156060000	175110000	106990000	5	2	4	49
O15400-2;O15400	O15400-2;O15400	4;4	4;4	4;4	131330000	95906000	0	Syntaxin-7	STX7	;	2	4	4	4	4	3	2	4	3	2	4	3	2	24.3	24.3	24.3	27.4	239	239;261	1	47	0	10.983	24.3	17.6	12.1	1549200000	170210000	90074000	65129000	1	0	0	9
O15427;J3QQV2;J3QSC3;J3QQS9;J3KTI8;J3KT83;J3QRA0;J3QLE3;J3KTM6;J3QRU2;J3QRP8	O15427;J3QQV2;J3QSC3	11;7;7;5;5;4;4;2;2;2;1	11;7;7;5;5;4;4;2;2;2;1	11;7;7;5;5;4;4;2;2;2;1	2131800000	2068100000	2066500000	Monocarboxylate transporter 4	SLC16A3	;;	11	11	11	11	9	10	10	9	10	10	9	10	10	23.4	23.4	23.4	49.469	465	465;263;291;235;306;219;223;135;157;163;79	1	169	0	40.154	20.2	21.9	21.9	23514000000	1830300000	1886900000	2160500000	9	7	9	92
O15438;O15438-4;O15438-2;O15438-5	O15438;O15438-4;O15438-2	6;6;3;1	6;6;3;1	6;6;3;1	36085000	0	0	Canalicular multispecific organic anion transporter 2	ABCC3	;;	4	6	6	6	5	4	3	5	4	3	5	4	3	5.2	5.2	5.2	169.34	1527	1527;1578;1238;572	1	48	0	9.5271	4.3	3.4	2.8	478730000	40696000	32517000	54238000	0	1	1	11
O15460-2;O15460;E7ENX0;E7EPI9;C9JX45;A8MXE0;E7ERI1;C9JCP0;C9JN43;C9JIG4;C9JFJ1	O15460-2;O15460	17;17;5;5;4;4;4;3;2;2;1	17;17;5;5;4;4;4;3;2;2;1	17;17;5;5;4;4;4;3;2;2;1	674000000	755760000	705940000	Prolyl 4-hydroxylase subunit alpha-2	P4HA2	;	11	17	17	17	16	15	12	16	15	12	16	15	12	37	37	37	60.632	533	533;535;204;236;153;167;184;146;101;114;50	1	188	0	38.051	35.1	34.1	27.2	8983900000	538250000	813250000	429270000	8	8	5	87
O15498;B4DR94;H7C3K7	O15498;B4DR94	8;6;1	8;6;1	8;6;1	289330000	263620000	192790000	Synaptobrevin homolog YKT6	YKT6	;	3	8	8	8	7	8	5	7	8	5	7	8	5	51.5	51.5	51.5	22.417	198	198;164;29	1	123	0	49.342	44.9	51.5	25.3	3295500000	277320000	265090000	150040000	4	2	2	41
O15511;B1ALC0;O15511-2	O15511;B1ALC0;O15511-2	6;5;5	6;5;5	5;4;4	397450000	432720000	377560000	Actin-related protein 2/3 complex subunit 5	ARPC5	;;	3	6	6	5	4	3	4	4	3	4	3	2	4	62.3	62.3	57	16.32	151	151;135;154	1	58	0	42.819	34.4	25.8	48.3	5155600000	449940000	365510000	329780000	3	5	4	41
O43143	O43143	32	32	31	1318800000	1336900000	1199500000	Pre-mRNA-splicing factor ATP-dependent RNA helicase DHX15	DHX15		1	32	32	31	28	25	23	28	25	23	27	24	22	50.2	50.2	49.1	90.932	795	795	1	415	0	161.28	44.5	41.1	35.5	16446000000	1264100000	1277000000	1059200000	23	14	18	247
O43148;O43148-2;K7EP06;K7EPP5;F5H2D9;K7ERH6	O43148;O43148-2;K7EP06	6;6;3;2;2;1	6;6;3;2;2;1	6;6;3;2;2;1	91731000	93396000	75195000	mRNA cap guanine-N7 methyltransferase	RNMT	;;	6	6	6	6	5	4	4	5	4	4	5	4	4	15.8	15.8	15.8	54.843	476	476;504;298;101;234;114	1	68	0	10.366	13.4	11.8	11.8	1099700000	112060000	84850000	73364000	2	2	0	25
O43156	O43156	6	6	6	60236000	71599000	0	TELO2-interacting protein 1 homolog	TTI1		1	6	6	6	6	4	1	6	4	1	6	4	1	6.3	6.3	6.3	122.07	1089	1089	1	55	0	15.293	6.3	3.9	1.3	737340000	95604000	63742000	18956000	2	1	0	13
O43172-2;O43172	O43172-2;O43172	11;11	11;11	11;11	192220000	251850000	237880000	U4/U6 small nuclear ribonucleoprotein Prp4	PRPF4	;	2	11	11	11	7	8	9	7	8	9	7	8	9	29.9	29.9	29.9	58.32	521	521;522	1	100	0	23.489	19.2	21.5	24.2	2805600000	200800000	242350000	273010000	4	4	3	40
O43175;Q5SZU1	O43175;Q5SZU1	16;13	16;13	16;13	1452600000	1339500000	1483300000	D-3-phosphoglycerate dehydrogenase	PHGDH	;	2	16	16	16	15	14	15	15	14	15	15	14	15	37.1	37.1	37.1	56.65	533	533;499	1	238	0	82.951	34.1	32.1	35.5	16779000000	1485600000	1324800000	1313800000	15	9	17	159
O43237;O43237-2;J3KRI4;B4E2E0;E7EPL8;J3KRZ2;H3BUM4	O43237;O43237-2	12;10;5;5;3;2;2	11;10;5;4;2;2;2	11;10;5;4;2;2;2	321930000	319440000	308630000	Cytoplasmic dynein 1 light intermediate chain 2	DYNC1LI2	;	7	12	11	11	11	10	9	10	9	8	10	9	8	37.8	35.2	35.2	54.099	492	492;415;167;271;209;92;186	1	126	0	43.684	34.8	30.5	28.5	4020900000	334850000	309520000	315270000	5	3	7	66
O43242;B4DT72;H0YGV8;F5H8K4	O43242;B4DT72	28;20;4;1	28;20;4;1	28;20;4;1	1581700000	1473500000	1411700000	26S proteasome non-ATPase regulatory subunit 3	PSMD3	;	4	28	28	28	25	20	22	25	20	22	25	20	22	55.1	55.1	55.1	60.977	534	534;356;117;86	1	347	0	155.76	51.9	42.3	47.4	17789000000	1633500000	1267800000	1297200000	16	13	16	176
O43252	O43252	19	19	19	738470000	702750000	718390000	Bifunctional 3-phosphoadenosine 5-phosphosulfate synthase 1;Sulfate adenylyltransferase;Adenylyl-sulfate kinase	PAPSS1		1	19	19	19	17	16	16	17	16	16	17	16	16	45	45	45	70.832	624	624	1	238	0	63.124	39.3	38.1	38.1	8867800000	741980000	666310000	732820000	7	6	6	85
O43264;A1A528;F5H3C1	O43264;A1A528	9;8;1	9;8;1	9;8;1	95700000	78936000	76601000	Centromere/kinetochore protein zw10 homolog	ZW10	;	3	9	9	9	6	5	6	6	5	6	6	5	6	15	15	15	88.828	779	779;672;135	1	75	0	20.525	9.6	7.4	9.4	966430000	48565000	62667000	92792000	4	2	1	30
O43290;E9PQI8	O43290	5;1	5;1	5;1	0	0	64813000	U4/U6.U5 tri-snRNP-associated protein 1	SART1		2	5	5	5	3	2	4	3	2	4	3	2	4	9.1	9.1	9.1	90.254	800	800;164	1	41	0	9.6157	5.2	2.9	7.2	546510000	44098000	28201000	57537000	0	1	2	14
O43292;O43292-2;E9PPZ9;E9PQ31;E9PLV6;E9PM11;E9PLG8;E9PM94	O43292;O43292-2;E9PPZ9;E9PQ31	8;7;4;4;3;2;1;1	8;7;4;4;3;2;1;1	8;7;4;4;3;2;1;1	100570000	117360000	122380000	Glycosylphosphatidylinositol anchor attachment 1 protein	GPAA1	;;;	8	8	8	8	5	6	5	5	6	5	5	6	5	13	13	13	67.622	621	621;561;260;265;234;158;81;98	1	65	0	12.002	8.5	10.5	8.1	1529500000	93197000	99979000	86689000	1	3	2	18
O43293;O43293-2	O43293;O43293-2	2;1	2;1	2;1	0	0	13139000	Death-associated protein kinase 3	DAPK3	;	2	2	2	2	1	0	2	1	0	2	1	0	2	4.8	4.8	4.8	52.535	454	454;322	1	19	0.0002588	3.132	2	0	4.8	122850000	6207700	0	12385000	1	0	1	12
O43324;D6RBD7;C9J1V9;O43324-2;H0YAL7;D6RCQ0;H0YAH9	O43324;D6RBD7;C9J1V9;O43324-2;H0YAL7	9;7;7;7;6;2;1	9;7;7;7;6;2;1	9;7;7;7;6;2;1	462170000	395460000	461350000	Eukaryotic translation elongation factor 1 epsilon-1	EEF1E1;EEF1E1-BLOC1S5	;;;;	7	9	9	9	8	8	8	8	8	8	8	8	8	60.9	60.9	60.9	19.81	174	174;150;151;139;136;94;56	1	131	0	28.113	54	55.7	46.6	5303000000	462910000	360370000	567810000	6	3	5	56
O43390;O43390-2;O43390-3;O43390-4;B4DT28;E7ETM7	O43390;O43390-2;O43390-3;O43390-4;B4DT28;E7ETM7	25;24;22;20;18;14	19;18;17;15;14;10	19;18;17;15;14;10	558690000	554580000	529990000	Heterogeneous nuclear ribonucleoprotein R	HNRNPR	;;;;;	6	25	19	19	20	22	22	15	16	16	15	16	16	47.1	37.8	37.8	70.942	633	633;636;595;535;494;473	1	243	0	72.523	36	41.2	40.9	6807200000	528480000	462450000	601350000	11	8	7	104
O43396;K7ER96;G3V1K0;K7EML9;K7EPB7;K7EME7;K7EKG2	O43396;K7ER96;G3V1K0	14;13;8;6;2;2;1	14;13;8;6;2;2;1	14;13;8;6;2;2;1	973100000	1020900000	1048900000	Thioredoxin-like protein 1	TXNL1	;;	7	14	14	14	13	10	12	13	10	12	13	10	12	76.8	76.8	76.8	32.251	289	289;281;166;138;69;103;27	1	173	0	113.51	73	57.4	61.6	11727000000	973590000	856700000	1004500000	11	9	9	118
O43399;O43399-5;O43399-7	O43399;O43399-5;O43399-7	13;13;13	13;13;13	3;3;3	1198100000	1194900000	1132300000	Tumor protein D54	TPD52L2	;;	3	13	13	3	11	12	11	11	12	11	2	3	3	62.6	62.6	13.6	22.237	206	206;220;229	1	196	0	225.08	59.2	62.6	57.3	15276000000	1253800000	1130300000	1140800000	14	12	7	116
O43427-2;O43427;E9PSD3;H0YCE7;E9PJW6	O43427-2;O43427;E9PSD3	5;5;3;2;2	5;5;3;2;2	5;5;3;2;2	34454000	40267000	0	Acidic fibroblast growth factor intracellular-binding protein	FIBP	;;	5	5	5	5	5	3	2	5	3	2	5	3	2	17.4	17.4	17.4	41.21	357	357;364;348;137;146	1	39	0	7.7978	17.4	10.4	7	432470000	48823000	25619000	19110000	3	1	0	17
O43432;O43432-3;O43432-4;F5H564;F5H8J4;Q5SWD0	O43432;O43432-3;O43432-4;F5H564;F5H8J4	21;21;18;17;16;1	15;15;12;12;11;1	11;11;11;11;11;1	240760000	196590000	195490000	Eukaryotic translation initiation factor 4 gamma 3	EIF4G3	;;;;	6	21	15	11	18	17	17	12	11	11	9	7	8	15.5	11.9	9.3	176.65	1585	1585;1591;1305;1189;1075;164	1	143	0	28.795	13.2	11.7	11.9	2545500000	232910000	174140000	178850000	5	2	5	31
O43447;C9JQD4;A6NNE7;H0YEL5;A6NM32	O43447;C9JQD4;A6NNE7;H0YEL5	8;7;6;5;2	8;7;6;5;2	8;7;6;5;2	290710000	241460000	265380000	Peptidyl-prolyl cis-trans isomerase H;Peptidyl-prolyl cis-trans isomerase	PPIH	;;;	5	8	8	8	7	4	6	7	4	6	7	4	6	62.1	62.1	62.1	19.208	177	177;144;134;96;57	1	71	0	19.395	46.9	21.5	34.5	3359600000	260300000	168050000	306810000	5	3	2	41
O43464-2;O43464-3;O43464;O43464-4;P83110-2;P83110	O43464-2;O43464-3;O43464;O43464-4	6;6;6;3;1;1	6;6;6;3;1;1	6;6;6;3;1;1	55444000	68983000	66267000	Serine protease HTRA2, mitochondrial	HTRA2	;;;	6	6	6	6	3	5	2	3	5	2	3	5	2	28	28	28	38.493	361	361;436;458;377;357;453	1	42	0	44.993	10	20.2	6.4	725460000	40104000	55377000	41270000	0	3	0	18
O43491;E9PHY5;O43491-4;E9PK52;O43491-3;E9PII3;O43491-2;H0Y5B0;Q6R5J7;E9PMV8;E9PQD2;E9PRG1;E9PIG0;Q6ZSX4;E9PMG5;E9PPC9;E9PJP4;E9PQN0;J3QS55;E9PN54	O43491;E9PHY5;O43491-4;E9PK52;O43491-3;E9PII3;O43491-2	25;24;22;21;19;18;18;9;7;6;4;3;3;3;3;2;1;1;1;1	25;24;22;21;19;18;18;9;7;6;4;3;3;3;3;2;1;1;1;1	23;22;20;19;17;16;16;9;7;6;4;3;3;3;3;2;1;1;0;1	543150000	505490000	601360000	Band 4.1-like protein 2	EPB41L2	;;;;;;	20	25	25	23	23	19	20	23	19	20	21	17	18	33.3	33.3	31.1	112.59	1005	1005;935;852;811;747;706;673;380;383;268;179;153;162;201;224;126;118;127;162;240	1	279	0	81.482	31.4	24.4	25.4	7198700000	662530000	488130000	527260000	12	7	7	99
O43504;R4GMU8;E9PLX3	O43504;R4GMU8;E9PLX3	5;4;4	5;4;4	5;4;4	239760000	228230000	279400000	Ragulator complex protein LAMTOR5	LAMTOR5	;;	3	5	5	5	5	4	3	5	4	3	5	4	3	96.7	96.7	96.7	9.6138	91	91;79;90	1	68	0	191.54	96.7	70.3	54.9	3322800000	298100000	223190000	234440000	4	3	3	43
O43583;F8VVL1	O43583;F8VVL1	7;5	7;5	7;5	80751000	109820000	86528000	Density-regulated protein	DENR	;	2	7	7	7	4	4	5	4	4	5	4	4	5	38.4	38.4	38.4	22.092	198	198;160	1	52	0	16.626	23.7	23.7	27.8	1010600000	72880000	75496000	86547000	2	2	2	22
O43592;F8WDU6;F5GYW6;F5GZM3	O43592	23;8;4;3	23;8;4;3	23;8;4;3	372550000	379160000	401660000	Exportin-T	XPOT		4	23	23	23	18	16	13	18	16	13	18	16	13	33.2	33.2	33.2	109.96	962	962;201;60;228	1	239	0	96.923	25.9	22	18.3	4957500000	428500000	368450000	346430000	13	6	5	98
O43615;M0QXU7;M0R301;M0QXM9;M0R124	O43615;M0QXU7	16;10;4;4;2	16;10;4;4;2	16;10;4;4;2	385370000	409850000	387080000	Mitochondrial import inner membrane translocase subunit TIM44	TIMM44	;	5	16	16	16	12	13	15	12	13	15	12	13	15	38.9	38.9	38.9	51.355	452	452;273;126;133;139	1	163	0	32.997	30.1	32.3	37.2	4542700000	331060000	341150000	476030000	5	4	3	39
O43617;O43617-2;A6NKE1	O43617;O43617-2	5;4;2	5;4;2	5;4;2	145940000	194240000	197860000	Trafficking protein particle complex subunit 3	TRAPPC3	;	3	5	5	5	4	5	5	4	5	5	4	5	5	24.4	24.4	24.4	20.274	180	180;134;118	1	57	0	6.8967	20.6	24.4	24.4	2337700000	157050000	200020000	213330000	2	3	3	27
O43633;M0R1T5;M0R1L7;M0QXX8	O43633;M0R1T5;M0R1L7	6;5;4;1	6;5;4;1	6;5;4;1	245040000	148190000	235530000	Charged multivesicular body protein 2a	CHMP2A	;;	4	6	6	6	3	4	5	3	4	5	3	4	5	23.4	23.4	23.4	25.104	222	222;227;159;55	1	57	0	19.015	10.4	20.3	20.3	3160900000	175340000	165450000	255710000	2	2	2	24
O43657	O43657	3	3	3	78706000	87138000	91883000	Tetraspanin-6	TSPAN6		1	3	3	3	3	3	3	3	3	3	3	3	3	15.5	15.5	15.5	27.563	245	245	1	34	0	6.0696	15.5	15.5	15.5	997140000	84522000	106220000	131770000	1	1	1	14
O43674;E7EWP0;H0Y886;O43674-2;F8WDZ2;F8WDD2;H7C568	O43674;E7EWP0;H0Y886;O43674-2;F8WDZ2;F8WDD2	4;3;3;3;2;2;1	4;3;3;3;2;2;1	4;3;3;3;2;2;1	264550000	267890000	287470000	NADH dehydrogenase [ubiquinone] 1 beta subcomplex subunit 5, mitochondrial	NDUFB5	;;;;;	7	4	4	4	2	2	3	2	2	3	2	2	3	18.5	18.5	18.5	21.75	189	189;177;206;137;42;66;100	1	32	0.00026596	3.464	8.5	8.5	12.7	3457700000	286400000	228010000	306410000	1	1	1	8
O43676;C9JKQ2	O43676;C9JKQ2	2;1	2;1	2;1	39059000	41772000	36712000	NADH dehydrogenase [ubiquinone] 1 beta subcomplex subunit 3	NDUFB3	;	2	2	2	2	2	2	2	2	2	2	2	2	2	21.4	21.4	21.4	11.402	98	98;65	1	25	0	4.624	21.4	21.4	21.4	474200000	38445000	38436000	39280000	2	1	2	17
O43681;K7ERW9	O43681	11;5	11;5	11;5	801570000	707360000	705360000	ATPase ASNA1	ASNA1		2	11	11	11	11	10	10	11	10	10	11	10	10	47.7	47.7	47.7	38.792	348	348;200	1	189	0	81.703	47.7	41.1	41.1	9119100000	823910000	683100000	715110000	11	11	12	125
O43684-2;O43684;J3QT28;B4DDM6;J3QSX4	O43684-2;O43684;J3QT28;B4DDM6	15;15;14;10;7	15;15;14;10;7	15;15;14;10;7	1503400000	1378700000	1491900000	Mitotic checkpoint protein BUB3	BUB3	;;;	5	15	15	15	14	14	11	14	14	11	14	14	11	66.6	66.6	66.6	36.954	326	326;328;278;248;145	1	218	0	103.94	63.2	63.2	45.1	17550000000	1444200000	1310700000	1271900000	13	13	10	139
O43688;O43688-2;K7EMK9;O43688-3;K7ENH4	O43688;O43688-2;K7EMK9;O43688-3	4;4;3;3;1	4;4;3;3;1	4;4;3;3;1	110350000	135630000	98809000	Lipid phosphate phosphohydrolase 2	PPAP2C	;;;	5	4	4	4	3	3	3	3	3	3	3	3	3	18.1	18.1	18.1	32.573	288	288;309;166;232;136	1	30	0	38.772	13.9	11.1	11.1	1041500000	130270000	84780000	75743000	2	2	2	14
O43707;O43707-2;F5GXS2;O43707-3;K7EP19;D6RH00	O43707;O43707-2;F5GXS2;O43707-3	68;49;39;39;7;1	68;49;39;39;7;1	19;12;12;12;4;0	43486000000	40809000000	41913000000	Alpha-actinin-4	ACTN4	;;;	6	68	68	19	63	62	63	63	62	63	18	18	18	79.1	79.1	24.7	104.85	911	911;692;521;521;105;72	1	1632	0	323.31	74.1	74.1	74.2	531730000000	44637000000	37035000000	42188000000	116	113	117	1418
O43709;O43709-3;H7C170	O43709;O43709-3;H7C170	3;3;2	3;3;2	3;3;2	59917000	68574000	62201000	Probable 18S rRNA (guanine-N(7))-methyltransferase	WBSCR22	;;	3	3	3	3	3	3	2	3	3	2	3	3	2	16.4	16.4	16.4	31.88	281	281;298;128	1	37	0	7.5196	16.4	16.4	10.7	775760000	72987000	71381000	56452000	2	2	2	19
O43719;Q5H919;Q5H918	O43719	12;5;5	12;5;5	12;5;5	145580000	159730000	113700000	HIV Tat-specific factor 1	HTATSF1		3	12	12	12	7	8	9	7	8	9	7	8	9	24	24	24	85.852	755	755;223;244	1	103	0	54.542	12.7	13.2	16.7	1774200000	124600000	158590000	120460000	6	1	4	31
O43752;O43752-2	O43752;O43752-2	4;2	4;2	4;2	0	66179000	0	Syntaxin-6	STX6	;	2	4	4	4	1	2	3	1	2	3	1	2	3	24.7	24.7	24.7	29.176	255	255;154	1	28	0	9.8864	9.8	15.3	14.9	490360000	10167000	41497000	52980000	0	1	0	10
O43760;Q3KQZ2;K7ELS8;K7ELD9;K7ENG9;K7EJ35	O43760;Q3KQZ2;K7ELS8;K7ELD9;K7ENG9	4;4;3;2;2;1	4;4;3;2;2;1	4;4;3;2;2;1	89800000	143920000	127160000	Synaptogyrin-2	SYNGR2	;;;;	6	4	4	4	4	3	4	4	3	4	4	3	4	16.1	16.1	16.1	24.81	224	224;275;135;65;113;168	1	40	0	5.7733	16.1	12.5	16.1	1392800000	103620000	161750000	103260000	1	3	2	17
O43765;K7EMD6;K7ERW5	O43765;K7EMD6	8;6;1	8;6;1	8;6;1	251360000	237050000	311290000	Small glutamine-rich tetratricopeptide repeat-containing protein alpha	SGTA	;	3	8	8	8	6	6	6	6	6	6	6	6	6	30	30	30	34.063	313	313;162;68	1	99	0	33.499	24	24	24	3498000000	255420000	233210000	299230000	4	4	4	52
O43772;C9JPE1;B4DWZ5	O43772;C9JPE1;B4DWZ5	5;4;4	5;4;4	5;4;4	41486000	0	0	Mitochondrial carnitine/acylcarnitine carrier protein	SLC25A20	;;	3	5	5	5	3	1	1	3	1	1	3	1	1	20.9	20.9	20.9	32.943	301	301;228;251	1	23	0	5.5415	10.6	2.7	2.7	399670000	37839000	32450000	16479000	2	0	0	9
O43809;H3BND3;H3BV41	O43809;H3BND3	12;9;5	12;9;5	12;9;5	1084700000	1082400000	1139700000	Cleavage and polyadenylation specificity factor subunit 5	NUDT21	;	3	12	12	12	11	10	10	11	10	10	11	10	10	54.6	54.6	54.6	26.227	227	227;149;71	1	201	0	71.477	54.2	42.7	42.7	13107000000	1266400000	873920000	1040500000	11	9	7	106
O43813;E9PHS0;F8WDS9;H7C2E3	O43813;E9PHS0	12;7;3;3	12;7;3;3	12;7;3;3	236960000	210760000	235650000	LanC-like protein 1	LANCL1	;	4	12	12	12	8	8	5	8	8	5	8	8	5	41.6	41.6	41.6	45.283	399	399;196;82;147	1	91	0	50.692	31.1	32.8	18.8	2902500000	324910000	223820000	158860000	4	4	3	50
O43819;C9JBU1	O43819;C9JBU1	2;1	2;1	2;1	44971000	46125000	47170000	Protein SCO2 homolog, mitochondrial	SCO2	;	2	2	2	2	2	2	2	2	2	2	2	2	2	10.5	10.5	10.5	29.81	266	266;136	1	23	0	3.9459	10.5	10.5	10.5	435350000	43523000	46672000	50643000	2	0	0	11
O43837;O43837-2;O43837-3	O43837;O43837-2	10;9;4	10;9;4	10;9;4	207890000	214290000	198380000	Isocitrate dehydrogenase [NAD] subunit beta, mitochondrial	IDH3B	;	3	10	10	10	8	9	8	8	9	8	8	9	8	32.5	32.5	32.5	42.183	385	385;383;233	1	124	0	24.616	28.1	28.3	28.1	2473500000	212590000	183440000	231770000	5	6	6	67
O43852;O43852-3;O43852-6;O43852-5;O43852-15;O43852-10;H0Y875;O43852-9;O43852-13;O43852-14;O43852-11;O43852-12	O43852;O43852-3;O43852-6;O43852-5;O43852-15;O43852-10;H0Y875;O43852-9	22;22;16;15;13;13;12;12;9;9;9;4	22;22;16;15;13;13;12;12;9;9;9;4	5;5;5;5;0;5;0;2;5;5;5;0	4286700000	4470600000	4714600000	Calumenin	CALU	;;;;;;;	12	22	22	5	21	20	20	21	20	20	4	5	5	72.4	72.4	13.7	37.106	315	315;323;265;229;164;224;147;154;139;147;170;74	1	455	0	323.31	72.4	70.2	63.2	56438000000	4740400000	4514200000	4599100000	25	24	26	296
O43852-2;O43852-4;O43852-8;O43852-7	O43852-2;O43852-4;O43852-8	20;20;10;7	3;3;3;3	3;3;3;3	198470000	262450000	234220000	Calumenin	CALU	;;	4	20	3	3	20	17	17	3	2	2	3	2	2	74.3	15.6	15.6	37.134	315	315;323;201;161	1	36	0	17.907	74.3	63.5	56.5	2887700000	211300000	253620000	178740000	1	2	2	17
O43854-2;O43854	O43854-2;O43854	11;11	11;11	11;11	143300000	154650000	152880000	EGF-like repeat and discoidin I-like domain-containing protein 3	EDIL3	;	2	11	11	11	7	8	7	7	8	7	7	8	7	34.5	34.5	34.5	52.747	470	470;480	1	91	0	28.522	21.3	26.2	22.8	1800400000	169200000	167600000	158170000	1	4	4	48
O43865;O43865-2	O43865;O43865-2	11;9	11;9	6;4	207090000	208570000	234480000	Putative adenosylhomocysteinase 2	AHCYL1	;	2	11	11	6	11	7	8	11	7	8	6	3	3	26.6	26.6	16.4	58.951	530	530;483	1	102	0	29.235	26.6	16.4	16.6	2686600000	251980000	234780000	307360000	9	2	2	44
O43924;B8ZZK5;C9IZ52	O43924;B8ZZK5;C9IZ52	3;2;2	3;2;2	3;2;2	0	66111000	71807000	Retinal rod rhodopsin-sensitive cGMP 3,5-cyclic phosphodiesterase subunit delta	PDE6D	;;	3	3	3	3	1	2	2	1	2	2	1	2	2	28.7	28.7	28.7	17.42	150	150;93;104	1	19	0	4.8521	8	20.7	20.7	690900000	36185000	56821000	71051000	0	1	0	7
O43929;O43929-2;O43929-3;B7Z632;C9JGH7;C9J2X8;Q53SE3;Q5THS9;Q96NJ5-3;Q96NJ5-2;Q96NJ5	O43929;O43929-2;O43929-3	7;5;5;3;2;2;2;1;1;1;1	7;5;5;3;2;2;2;1;1;1;1	5;3;3;2;2;2;2;1;1;1;1	38766000	47016000	29803000	Origin recognition complex subunit 4	ORC4	;;	11	7	7	5	4	5	4	4	5	4	3	4	2	20.4	20.4	15.1	50.377	436	436;352;362;219;127;128;145;176;551;584;620	1	50	0	9.0642	10.8	14.4	12.6	465760000	31127000	38368000	25082000	1	4	2	19
O60216;E5RJW1;E5RJK5;E5RFV8;E5RIN7;Q9H4I0;E5RG18;E5RI01;E5RFZ5;Q9H4I0-2	O60216	5;2;2;2;2;2;1;1;1;1	5;2;2;2;2;2;1;1;1;1	5;2;2;2;2;2;1;1;1;1	29834000	31686000	33198000	Double-strand-break repair protein rad21 homolog	RAD21		10	5	5	5	3	3	3	3	3	3	3	3	3	9	9	9	71.689	631	631;120;124;225;228;556;69;135;176;521	1	38	0	7.0025	5.1	5.1	5.1	403270000	30580000	29849000	34275000	2	2	1	22
O60220	O60220	4	4	4	113890000	118100000	140320000	Mitochondrial import inner membrane translocase subunit Tim8 A	TIMM8A		1	4	4	4	4	3	3	4	3	3	4	3	3	68	68	68	10.998	97	97	1	49	0	35.473	68	38.1	38.1	1499900000	147980000	83245000	137430000	4	2	2	30
O60231;Q5SQH5;A2AB15	O60231	13;6;1	12;6;1	12;6;1	192680000	226270000	202590000	Putative pre-mRNA-splicing factor ATP-dependent RNA helicase DHX16	DHX16		3	13	12	12	11	10	10	10	9	9	10	9	9	17	16.1	16.1	119.26	1041	1041;560;295	1	135	0	40.918	14.3	13.1	12.9	2668500000	144640000	122710000	130850000	8	6	2	63
O60256;O60256-3;O60256-2;E7EPA1;O60256-4;C9K0K7;I3L0S1;C9JJS3;C9JDU5;I3L331;I3L164;C9JDH0;E7EW35;I3L4G9;I3L1T1;I3L3B8;I3L2J4	O60256;O60256-3;O60256-2;E7EPA1;O60256-4;C9K0K7;I3L0S1;C9JJS3	14;11;11;10;10;9;9;8;6;4;4;4;4;3;1;1;1	14;11;11;10;10;9;9;8;6;4;4;4;4;3;1;1;1	12;9;9;8;8;8;7;7;6;4;4;4;4;2;1;1;1	286370000	356460000	296640000	Phosphoribosyl pyrophosphate synthase-associated protein 2	PRPSAP2	;;;;;;;	17	14	14	12	10	10	9	10	10	9	9	8	8	55.3	55.3	49.6	40.925	369	369;320;329;268;283;244;260;194;176;93;104;140;161;143;47;57;78	1	155	0	46.165	37.7	37.4	32.2	3746500000	246630000	324400000	267170000	7	3	2	53
O60264;P28370-2;P28370	O60264	6;2;2	6;2;2	6;2;2	49434000	39757000	41364000	SWI/SNF-related matrix-associated actin-dependent regulator of chromatin subfamily A member 5	SMARCA5		3	6	6	6	4	5	2	4	5	2	4	5	2	6	6	6	121.9	1052	1052;1042;1054	1	42	0	8.8758	4.2	4.8	2	515020000	46253000	55677000	22051000	2	0	0	10
O60271-4;O60271-2;O60271;O60271-5;O60271-3;O60271-9;H0YBE9;H0YBS5;E9PFH7;Q9UPT6;Q9UPT6-2;H0Y981;D6RHI8	O60271-4;O60271-2;O60271;O60271-5;O60271-3;O60271-9	28;28;27;22;21;21;3;3;3;3;2;1;1	28;28;27;22;21;21;3;3;3;3;2;1;1	28;28;27;22;21;21;3;3;3;3;2;1;1	616600000	680620000	628250000	C-Jun-amino-terminal kinase-interacting protein 4	SPAG9	;;;;;	13	28	28	28	19	20	21	19	20	21	19	20	21	29.3	29.3	29.3	144.68	1307	1307;1311;1321;931;945;1177;174;250;1330;1336;250;152;156	1	311	0	148.94	20.3	20.8	22.3	7672800000	593100000	576890000	672410000	9	15	12	140
O60306;H0YH15	O60306	10;4	10;4	10;4	57865000	58084000	84733000	Intron-binding protein aquarius	AQR		2	10	10	10	6	6	7	6	6	7	6	6	7	10	10	10	171.29	1485	1485;646	1	67	0	24.764	5.1	5.2	7.3	770290000	62450000	50496000	95324000	2	4	4	32
O60343;O60343-2;O60343-3;O60343-4;O60343-5;Q5JU47	O60343;O60343-2;O60343-3	12;11;11;5;5;2	12;11;11;5;5;2	12;11;11;5;5;2	114340000	126790000	88594000	TBC1 domain family member 4	TBC1D4	;;	6	12	12	12	8	6	10	8	6	10	8	6	10	10.8	10.8	10.8	146.56	1298	1298;1235;1290;462;515;282	1	77	0	19.097	7.4	5.2	8.9	1449600000	201010000	138310000	183480000	3	2	3	27
O60427;O60427-2;F5H8G5;F5H3P6;F5H3U5;H7C2V0	O60427;O60427-2	4;2;1;1;1;1	4;2;1;1;1;1	4;2;1;1;1;1	66845000	44746000	0	Fatty acid desaturase 1	FADS1	;	6	4	4	4	3	2	2	3	2	2	3	2	2	12.8	12.8	12.8	51.964	444	444;360;124;146;192;228	1	33	0	14.179	8.1	6.3	6.3	602010000	71651000	25122000	19048000	2	1	2	24
O60443;O60443-3;H7C3W1;O60443-2;H7C147;H7BZJ0	O60443;O60443-3	12;7;5;4;3;2	12;7;5;4;3;2	12;7;5;4;3;2	154770000	187710000	148630000	Non-syndromic hearing impairment protein 5	DFNA5	;	6	12	12	12	9	8	9	9	8	9	9	8	9	31	31	31	54.554	496	496;332;216;101;192;155	1	110	0	33.086	24.4	22.8	26	1971800000	160150000	152850000	192130000	5	5	5	54
O60488-2;O60488;D6RF95;H0Y9A0;D6RD96;D6RFW9;D6RDA8	O60488-2;O60488	24;24;8;7;6;5;5	22;22;8;7;6;5;5	22;22;8;7;6;5;5	488460000	512310000	503120000	Long-chain-fatty-acid--CoA ligase 4	ACSL4	;	7	24	22	22	19	16	19	17	14	17	17	14	17	46.1	41.8	41.8	74.435	670	670;711;154;156;145;126;128	1	203	0	90.033	35.7	31.8	37.5	5934900000	569780000	426900000	566080000	9	9	9	103
O60493;O60493-2;O60493-4;O60493-3	O60493;O60493-2;O60493-4	9;8;7;4	9;8;7;4	9;8;7;4	760620000	788550000	740950000	Sorting nexin-3	SNX3	;;	4	9	9	9	8	8	7	8	8	7	8	8	7	69.8	69.8	69.8	18.762	162	162;130;140;113	1	116	0	31.195	61.7	61.7	41.4	8669600000	761930000	755410000	747420000	7	7	6	74
O60502-4;O60502;O60502-2;O60502-3;H7C3X0;B4DYV7	O60502-4;O60502;O60502-2;O60502-3	16;16;15;11;7;3	16;16;15;11;7;3	16;16;15;11;7;3	183550000	209700000	219150000	Protein O-GlcNAcase	MGEA5	;;;	6	16	16	16	9	8	9	9	8	9	9	8	9	25.6	25.6	25.6	96.931	863	863;916;849;677;256;151	1	117	0	24.451	14.5	13.2	14.4	2630000000	210890000	165410000	201920000	3	2	4	36
O60506;O60506-2;O60506-3;O60506-4;O60506-5;F6UXX1	O60506;O60506-2;O60506-3;O60506-4;O60506-5	27;26;25;24;17;9	27;26;25;24;17;9	21;20;20;19;14;7	3969200000	3897400000	3778500000	Heterogeneous nuclear ribonucleoprotein Q	SYNCRIP	;;;;	6	27	27	21	23	24	24	23	24	24	18	18	18	48.2	48.2	38.7	69.602	623	623;588;562;527;410;185	1	471	0	300.44	41.3	42.7	42.7	47220000000	3864200000	3691200000	3728400000	36	23	24	329
O60518	O60518	13	11	11	70850000	94623000	72503000	Ran-binding protein 6	RANBP6		1	13	11	11	10	7	7	9	5	5	9	5	5	15	13.3	13.3	124.71	1105	1105	1	74	0	47.036	11.7	7.7	7.6	1018400000	118750000	72863000	50289000	3	0	2	29
O60547;O60547-2	O60547;O60547-2	7;6	7;6	7;6	179800000	142700000	169680000	GDP-mannose 4,6 dehydratase	GMDS	;	2	7	7	7	6	5	6	6	5	6	6	5	6	23.7	23.7	23.7	41.949	372	372;342	1	103	0	20.818	21.5	17.7	21.5	2089400000	195460000	107210000	196680000	3	1	4	46
O60563;O60563-2	O60563	5;1	5;1	5;1	36046000	33153000	33714000	Cyclin-T1	CCNT1		2	5	5	5	4	4	3	4	4	3	4	4	3	7.9	7.9	7.9	80.684	726	726;184	1	42	0	4.5107	6.7	6.7	4.5	498870000	40725000	29262000	23294000	1	1	1	10
O60566;O60566-3;O60566-2	O60566;O60566-3;O60566-2	4;4;2	4;4;2	4;4;2	0	0	210870000	Mitotic checkpoint serine/threonine-protein kinase BUB1 beta	BUB1B	;;	3	4	4	4	1	1	2	1	1	2	1	1	2	4.8	4.8	4.8	119.54	1050	1050;1064;933	1	16	0	5.5804	2.1	2.1	2.9	373600000	6070400	10052000	266870000	0	1	1	9
O60568;H7C2V1;H7C2S8;H7C0B8;C9JU11;C9JIX5;H7C2A8	O60568	29;11;9;4;2;1;1	29;11;9;4;2;1;1	29;11;9;4;2;1;1	1150900000	1190300000	1184800000	Procollagen-lysine,2-oxoglutarate 5-dioxygenase 3	PLOD3		7	29	29	29	23	26	22	23	26	22	23	26	22	52	52	52	84.784	738	738;270;264;66;171;75;125	1	423	0	133.5	43.4	45.5	36.9	14760000000	1079500000	1100800000	1093000000	20	17	17	246
O60573;C9JEL3;B9A044;B8ZZ50;O60573-2;B8ZZL3;B4E1E4;B9A023	O60573;C9JEL3;B9A044;B8ZZ50;O60573-2;B8ZZL3	6;5;5;5;5;3;2;2	6;5;5;5;5;3;2;2	6;5;5;5;5;3;2;2	105750000	129190000	110980000	Eukaryotic translation initiation factor 4E type 2	EIF4E2	;;;;;	8	6	6	6	6	5	5	6	5	5	6	5	5	35.5	35.5	35.5	28.362	245	245;213;233;236;234;200;188;189	1	56	0	13.924	35.5	31.4	31.4	1246800000	120760000	129330000	111270000	1	2	2	18
O60637-3;O60637;H0YKJ9;O60637-2;H0YMH8	O60637-3;O60637;H0YKJ9;O60637-2	4;4;2;2;1	4;4;2;2;1	4;4;2;2;1	240590000	266840000	286210000	Tetraspanin-3	TSPAN3	;;;	5	4	4	4	3	4	3	3	4	3	3	4	3	16.9	16.9	16.9	21.183	189	189;253;164;228;45	1	43	0	5.3646	13.2	16.9	8.5	2859500000	168090000	298860000	295970000	2	2	3	22
O60645-2;O60645-3;O60645;D6RB59;H0Y995;D6RBR9	O60645-2;O60645-3;O60645;D6RB59	13;13;13;9;4;2	13;13;13;9;4;2	13;13;13;9;4;2	173400000	133730000	159180000	Exocyst complex component 3	EXOC3	;;;	6	13	13	13	11	10	8	11	10	8	11	10	8	26.2	26.2	26.2	73.796	641	641;745;756;462;473;68	1	114	0	48.575	22.9	19	16.7	1938300000	238370000	147210000	118950000	6	2	3	35
O60664-4;O60664;O60664-3;K7ERZ3;O60664-2;K7EL96;K7ER39	O60664-4;O60664;O60664-3;K7ERZ3;O60664-2	23;23;21;15;12;10;7	23;23;21;15;12;10;7	23;23;21;15;12;10;7	2989800000	2873900000	2874300000	Perilipin-3	PLIN3	;;;;	7	23	23	23	21	20	22	21	20	22	21	20	22	69.2	69.2	69.2	45.803	422	422;434;433;292;251;172;168	1	422	0	323.31	64	63.3	67.5	38379000000	3386500000	2466400000	2687100000	24	16	19	254
O60671-2;O60671;D6R9A1;O60671-3	O60671-2;O60671	4;4;1;1	4;4;1;1	4;4;1;1	48925000	44598000	0	Cell cycle checkpoint protein RAD1	RAD1	;	4	4	4	4	3	2	2	3	2	2	3	2	2	24	24	24	27.827	246	246;282;84;68	1	29	0	23.946	17.5	13.4	7.7	489330000	50130000	37945000	20620000	2	1	0	16
O60701;O60701-2;O60701-3;E7ER83;E7ETF4;E7EV97;E7ER95;D6RHF4;E9PBD2	O60701;O60701-2;O60701-3	23;20;19;5;5;5;3;1;1	23;20;19;5;5;5;3;1;1	23;20;19;5;5;5;3;1;1	3090700000	2974900000	3015300000	UDP-glucose 6-dehydrogenase	UGDH	;;	9	23	23	23	21	21	22	21	21	22	21	21	22	55.9	55.9	55.9	55.023	494	494;427;397;130;153;181;84;53;55	1	340	0	323.31	54.3	53.6	55.7	37053000000	3185900000	2701700000	3150600000	23	22	21	262
O60749;O60749-2;D6RC15	O60749;O60749-2	13;12;3	11;10;3	11;10;3	489910000	541050000	537120000	Sorting nexin-2	SNX2	;	3	13	11	11	11	11	11	10	10	9	10	10	9	29.5	25.4	25.4	58.47	519	519;402;265	1	146	0	65.592	25.2	24.9	25	6242300000	528650000	569710000	497960000	8	7	5	78
O60784;E7EPD0;O60784-2;O60784-4;O60784-3;B0QY01;B3KUU1;V9GYF4;B0QY02;V9GZ68;H7BYN7;F8WB30;F8WAW7;F8WE29;F8WBB0	O60784;E7EPD0;O60784-2;O60784-4;O60784-3	15;14;14;13;12;7;6;5;5;3;3;1;1;1;1	15;14;14;13;12;7;6;5;5;3;3;1;1;1;1	15;14;14;13;12;7;6;5;5;3;3;1;1;1;1	280700000	296870000	289650000	Target of Myb protein 1	TOM1	;;;;	15	15	15	15	12	10	11	12	10	11	12	10	11	44.5	44.5	44.5	53.818	492	492;454;493;460;447;334;265;134;151;125;133;25;69;83;97	1	126	0	98.858	34.3	30.1	30.3	3547400000	308130000	307050000	319840000	6	8	6	72
O60826	O60826	13	13	13	124620000	136020000	126870000	Coiled-coil domain-containing protein 22	CCDC22		1	13	13	13	11	9	8	11	9	8	11	9	8	31.9	31.9	31.9	70.755	627	627	1	113	0	53.202	26.8	21.1	22.3	1552600000	146850000	122650000	109990000	6	7	5	52
O60828-2;O60828;O60828-5;O60828-4;H7C053;C9JQA1;O60828-6;O60828-3;O60828-10;O60828-9;O60828-8;O60828-7	O60828-2;O60828;O60828-5;O60828-4;H7C053;C9JQA1;O60828-6;O60828-3	4;4;3;3;2;2;2;2;1;1;1;1	4;4;3;3;2;2;2;2;1;1;1;1	4;4;3;3;2;2;2;2;1;1;1;1	0	109320000	109140000	Polyglutamine-binding protein 1	PQBP1	;;;;;;;	12	4	4	4	1	3	3	1	3	3	1	3	3	20.5	20.5	20.5	30.401	264	264;265;165;170;150;213;149;224;60;67;73;128	1	28	0	11.38	3.4	15.9	15.9	1064200000	46275000	101840000	115260000	1	2	2	18
O60832;H7BZF2;H7C0M1;C9IYT0;O60832-2	O60832;H7BZF2;H7C0M1;C9IYT0;O60832-2	3;2;2;2;2	3;2;2;2;2	3;2;2;2;2	38095000	37416000	33874000	H/ACA ribonucleoprotein complex subunit 4	DKC1	;;;;	5	3	3	3	3	2	2	3	2	2	3	2	2	9.9	9.9	9.9	57.673	514	514;76;229;258;420	1	24	0	4.8794	9.9	6	6.4	352950000	36337000	28617000	28404000	2	1	1	9
O60841	O60841	38	38	38	1320100000	1471200000	1438900000	Eukaryotic translation initiation factor 5B	EIF5B		1	38	38	38	28	30	28	28	30	28	28	30	28	37.7	37.7	37.7	138.83	1220	1220	1	400	0	174.34	30.3	31	29.1	16159000000	1213600000	1393600000	1405200000	18	19	19	201
O60869-2;O60869-3;O60869	O60869-2;O60869-3;O60869	10;10;10	10;10;10	10;10;10	1075900000	1064300000	1063000000	Endothelial differentiation-related factor 1	EDF1	;;	3	10	10	10	8	8	10	8	8	10	8	8	10	59.7	59.7	59.7	15.48	139	139;141;148	1	156	0	36.612	46	52.5	59.7	11809000000	1174400000	980860000	1052300000	12	8	10	113
O60884;I3L320;H3BMW5	O60884	12;2;1	12;2;1	12;2;1	520840000	484260000	503480000	DnaJ homolog subfamily A member 2	DNAJA2		3	12	12	12	9	9	10	9	9	10	9	9	10	36.7	36.7	36.7	45.745	412	412;47;134	1	131	0	46.444	28.9	24.8	30.6	5652300000	519580000	360530000	451580000	7	5	4	61
O60885;M0QZD9;O60885-2;O60885-3	O60885	5;2;2;2	5;2;2;2	3;0;0;0	38839000	0	34412000	Bromodomain-containing protein 4	BRD4		4	5	5	3	4	4	5	4	4	5	3	3	3	3.8	3.8	2.5	152.22	1362	1362;572;722;794	1	45	0.00026151	3.2552	3.2	3.2	3.8	439960000	36531000	35229000	42623000	1	0	2	8
O60888-3;O60888;O60888-2;C9IZG4;C9IZQ5	O60888-3;O60888;O60888-2;C9IZG4	5;5;5;3;1	5;5;5;3;1	5;5;5;3;1	475830000	412080000	456030000	Protein CutA	CUTA	;;;	5	5	5	5	3	4	3	3	4	3	3	4	3	55.8	55.8	55.8	16.832	156	156;179;198;135;155	1	71	0	158.79	29.5	46.8	29.5	5841000000	445860000	754980000	337540000	8	6	4	76
O60925;E5RGS4;D6RGG5	O60925;E5RGS4	8;7;1	8;7;1	8;7;1	578150000	642450000	621890000	Prefoldin subunit 1	PFDN1	;	3	8	8	8	8	8	7	8	8	7	8	8	7	68	68	68	14.21	122	122;117;35	1	125	0	59.954	68	68	62.3	7618500000	739600000	616450000	687630000	6	4	4	69
O60927	O60927	3	3	3	27253000	0	0	Protein phosphatase 1 regulatory subunit 11	PPP1R11		1	3	3	3	2	1	1	2	1	1	2	1	1	32.5	32.5	32.5	13.952	126	126	1	17	0	26.074	32.5	12.7	12.7	303530000	27138000	18914000	26697000	0	1	1	12
O75044;H0Y4C3;H0Y2P8;Q5VZB4;P0DJJ0;H0Y582;E9PDX4	O75044;H0Y4C3;H0Y2P8;Q5VZB4	8;7;7;4;3;1;1	8;7;7;4;3;1;1	7;6;6;3;3;1;1	44836000	62212000	65502000	SLIT-ROBO Rho GTPase-activating protein 2	SRGAP2	;;;	7	8	8	7	5	3	4	5	3	4	4	2	3	10.5	10.5	9.3	120.88	1071	1071;931;985;450;459;230;252	1	48	0	15.884	7.7	4.1	5	640820000	47593000	47542000	67434000	1	1	1	19
O75083;O75083-3;D6RD66	O75083;O75083-3	33;20;16	33;20;16	33;20;16	5360200000	4793300000	5061900000	WD repeat-containing protein 1	WDR1	;	3	33	33	33	28	29	29	28	29	29	28	29	29	68.6	68.6	68.6	66.193	606	606;466;245	1	622	0	323.31	63.5	67.2	66	63302000000	4900500000	4621900000	5131800000	39	40	35	453
O75110-2;O75110;F5H8J1;O43861-2;O43861	O75110-2;O75110	3;3;1;1;1	3;3;1;1;1	3;3;1;1;1	0	0	34998000	Probable phospholipid-transporting ATPase IIA	ATP9A	;	5	3	3	3	2	2	3	2	2	3	2	2	3	4.2	4.2	4.2	105.13	926	926;1047;457;1136;1147	1	16	0.0040612	2.1674	2.4	2.8	4.2	136860000	19969000	11945000	34205000	1	0	1	3
O75116;E9PF63;D6REE7;C9JFJ0	O75116;E9PF63	28;26;3;1	28;26;3;1	26;24;3;1	445240000	443240000	436890000	Rho-associated protein kinase 2	ROCK2	;	4	28	28	26	21	21	22	21	21	22	19	20	21	24.7	24.7	23	160.9	1388	1388;1145;446;203	1	250	0	146.65	18.1	17.4	20.6	5501100000	437730000	393990000	464980000	11	8	13	124
O75131;E5RG68;H0YB26;E5RHZ0;E5RJ85;E5RG97;E5RFT7;Q7Z6C8;Q8IYJ1;Q96A23;O95741;Q9UBL6-2;Q96A23-2;Q9HCH3;O95741-2;Q9UBL6	O75131;E5RG68;H0YB26	14;9;7;6;5;3;2;1;1;1;1;1;1;1;1;1	14;9;7;6;5;3;2;1;1;1;1;1;1;1;1;1	13;9;7;6;5;3;2;0;0;0;0;0;0;0;0;0	433760000	382230000	322750000	Copine-3	CPNE3	;;	16	14	14	13	13	7	10	13	7	10	12	6	9	34.1	34.1	32.4	60.13	537	537;234;262;153;139;135;79;301;553;557;557;558;575;593;612;633	1	131	0	29.923	29.6	14.9	25.7	4991400000	438890000	456210000	232030000	5	3	5	69
O75146;O75146-2;H0YH66	O75146;O75146-2	12;6;2	12;6;2	12;6;2	122860000	124270000	124520000	Huntingtin-interacting protein 1-related protein	HIP1R	;	3	12	12	12	9	10	9	9	10	9	9	10	9	14.5	14.5	14.5	119.39	1068	1068;615;197	1	105	0	21.846	10.1	12.3	10	1415800000	126700000	119520000	129150000	3	4	2	29
O75165;H0Y8Q2	O75165	12;4	12;4	12;4	55404000	66981000	53045000	DnaJ homolog subfamily C member 13	DNAJC13		2	12	12	12	7	7	7	7	7	7	7	7	7	7.2	7.2	7.2	254.41	2243	2243;173	1	90	0	16.796	4.1	4.1	4.2	778910000	57498000	63613000	61144000	4	2	1	28
O75170-6;O75170-2;O75170-4;O75170-3;O75170-5;O75170;T1ECW5	O75170-6;O75170-2;O75170-4;O75170-3;O75170-5;O75170;T1ECW5	2;2;2;2;2;2;1	2;2;2;2;2;2;1	2;2;2;2;2;2;1	176210000	118580000	0	Serine/threonine-protein phosphatase 6 regulatory subunit 2	PPP6R2	;;;;;;	7	2	2	2	1	1	1	1	1	1	1	1	1	2.2	2.2	2.2	98.125	905	905;927;932;933;959;966;685	1	34	0	5.9749	1.4	1.4	1.4	1521900000	33924000	21476000	19837000	2	1	1	21
O75223;M0QZK8;B8ZZK2;O75223-3;O75223-2;O75223-4;H7BZK5	O75223;M0QZK8;B8ZZK2;O75223-3	9;5;5;5;4;4;3	9;5;5;5;4;4;3	9;5;5;5;4;4;3	276590000	330670000	257430000	Gamma-glutamylcyclotransferase	GGCT	;;;	7	9	9	9	8	7	7	8	7	7	8	7	7	66	66	66	21.007	188	188;103;166;94;114;166;119	1	89	0	35.366	60.1	46.3	47.9	3290800000	299180000	283190000	229140000	5	5	5	57
O75306-2;O75306;B7Z9L2	O75306-2;O75306;B7Z9L2	11;11;7	11;11;7	11;11;7	219510000	218350000	192720000	NADH dehydrogenase [ubiquinone] iron-sulfur protein 2, mitochondrial	NDUFS2	;;	3	11	11	11	9	11	10	9	11	10	9	11	10	30	30	30	51.851	457	457;463;231	1	117	0	35.373	24.3	30	27.6	2675200000	230680000	235370000	190650000	3	3	5	42
O75323;O75323-2;C9K068;F8WBI5;C9J7B1;H7C333	O75323;O75323-2;C9K068	5;4;3;2;1;1	4;3;3;1;1;1	4;3;3;1;1;1	0	0	37127000	Protein NipSnap homolog 2	GBAS	;;	6	5	4	4	3	1	5	2	1	4	2	1	4	20.6	17.8	17.8	33.742	286	286;247;80;145;65;114	1	31	0	11.599	15	5.6	20.6	350890000	22321000	13661000	60922000	1	0	1	9
O75340;O75340-2;H0Y9X3;E7EPW6;O75340-3;D6RA21;Q86W51	O75340;O75340-2	9;8;3;2;2;1;1	9;8;3;2;2;1;1	9;8;3;2;2;1;1	1306900000	1432500000	1381900000	Programmed cell death protein 6	PDCD6	;	7	9	9	9	8	7	7	8	7	7	8	7	7	70.2	70.2	70.2	21.868	191	191;189;104;73;69;39;55	1	113	0	89.184	61.3	47.1	47.1	16707000000	1314800000	1359000000	1157600000	8	6	7	75
O75348;F2Z307;O95670-2;O95670	O75348	6;1;1;1	6;1;1;1	6;1;1;1	132510000	129010000	151940000	V-type proton ATPase subunit G 1	ATP6V1G1		4	6	6	6	6	4	5	6	4	5	6	4	5	48.3	48.3	48.3	13.757	118	118;99;78;118	1	54	0	72.158	48.3	31.4	35.6	1624900000	199880000	130800000	154210000	2	0	2	17
O75351;Q6PIW4-2;Q6PIW4	O75351	13;1;1	13;1;1	10;0;0	315560000	246980000	238680000	Vacuolar protein sorting-associated protein 4B	VPS4B		3	13	13	10	10	10	10	10	10	10	7	7	7	39	39	32.4	49.301	444	444;563;674	1	137	0	27.124	30.6	30.4	28.8	3245800000	326890000	266890000	285810000	5	5	3	51
O75368	O75368	8	8	8	546550000	583850000	585030000	SH3 domain-binding glutamic acid-rich-like protein	SH3BGRL		1	8	8	8	6	6	6	6	6	6	6	6	6	78.1	78.1	78.1	12.774	114	114	1	103	0	20.953	62.3	62.3	62.3	6699000000	525830000	542830000	586020000	7	6	6	69
O75369-8;O75369-2;O75369-9;O75369;O75369-6;O75369-3;E7EN95;O75369-7;O75369-5;O75369-4;H7C5L4;Q8WXT3	O75369-8;O75369-2;O75369-9;O75369;O75369-6;O75369-3;E7EN95;O75369-7;O75369-5;O75369-4	152;150;150;150;147;147;137;137;121;121;6;2	152;150;150;150;147;147;137;137;121;121;6;2	138;136;136;136;133;133;131;131;109;109;5;2	28512000000	29086000000	29696000000	Filamin-B	FLNB	;;;;;;;;;	12	152	152	138	140	140	139	140	140	139	128	126	126	77.2	77.2	73	281.63	2633	2633;2578;2591;2602;2537;2561;2409;2422;2146;2150;135;72	1	2741	0	323.31	73.6	71.1	71.2	361230000000	27606000000	27239000000	29518000000	180	165	154	1986
O75396	O75396	12	12	12	2553500000	2395900000	2403600000	Vesicle-trafficking protein SEC22b	SEC22B		1	12	12	12	11	11	11	11	11	11	11	11	11	51.6	51.6	51.6	24.593	215	215	1	243	0	323.31	51.6	51.6	48.8	29607000000	2468300000	2350700000	2557000000	11	12	13	137
O75400-2;O75400-3;O75400;F5H578;H0YG38;H7C2N3	O75400-2;O75400-3;O75400	12;12;12;4;2;1	12;12;12;4;2;1	12;12;12;4;2;1	269270000	245610000	295120000	Pre-mRNA-processing factor 40 homolog A	PRPF40A	;;	6	12	12	12	11	11	9	11	11	9	11	11	9	15.2	15.2	15.2	105.93	930	930;939;957;448;346;163	1	147	0	31.231	14.1	13.3	11.3	3242800000	295360000	303780000	273680000	5	3	7	48
O75436;F5H4L7;S4R3Q6;O75436-2;G3V1N8;S4R2Y3	O75436;F5H4L7;S4R3Q6;O75436-2;G3V1N8	16;15;12;12;9;1	16;15;12;12;9;1	14;13;11;11;7;1	1168700000	1071800000	1036400000	Vacuolar protein sorting-associated protein 26A	VPS26A	;;;;	6	16	16	14	15	16	15	15	16	15	14	14	13	56.9	56.9	52.6	38.169	327	327;310;226;251;216;63	1	238	0	167.97	54.7	56.9	52.9	13108000000	1072900000	1078800000	1097400000	12	11	11	130
O75439;G3V0E4;E7ERZ4;F8WAZ6;F8WEA6;F8WBE1	O75439;G3V0E4;E7ERZ4	16;14;11;7;3;3	16;14;11;7;3;3	16;14;11;7;3;3	669100000	629240000	628060000	Mitochondrial-processing peptidase subunit beta	PMPCB	;;	6	16	16	16	14	13	15	14	13	15	14	13	15	42.9	42.9	42.9	54.366	489	489;490;403;202;119;122	1	243	0	142.62	39.5	32.7	41.5	7830300000	671090000	678080000	681690000	14	7	12	117
O75475;O75475-3;O75475-2	O75475;O75475-3;O75475-2	10;9;9	9;8;8	9;8;8	247550000	283360000	245700000	PC4 and SFRS1-interacting protein	PSIP1	;;	3	10	9	9	8	8	8	7	7	7	7	7	7	20.8	19.2	19.2	60.103	530	530;329;333	1	108	0	20.138	15.5	15.3	15.5	3431800000	235510000	229480000	237680000	5	4	4	58
O75477;B0QZ43	O75477;B0QZ43	10;7	7;4	7;4	121690000	144850000	116090000	Erlin-1	ERLIN1	;	2	10	7	7	6	6	7	3	3	4	3	3	4	32.9	24	24	38.925	346	346;275	1	57	0	12.351	19.1	18.8	19.9	1511900000	76840000	78013000	92164000	2	0	1	19
O75489;E9PS48;B4DFM8;E9PKL8;G3V194;E9PJE7	O75489	10;3;3;2;2;1	10;3;3;2;2;1	10;3;3;2;2;1	320680000	225010000	254250000	NADH dehydrogenase [ubiquinone] iron-sulfur protein 3, mitochondrial	NDUFS3		6	10	10	10	7	4	7	7	4	7	7	4	7	46.2	46.2	46.2	30.241	264	264;161;132;77;121;67	1	104	0	34.929	30.7	16.7	33.7	3955100000	482790000	141620000	204000000	5	1	5	49
O75506	O75506	2	2	2	81273000	0	0	Heat shock factor-binding protein 1	HSBP1		1	2	2	2	2	1	0	2	1	0	2	1	0	47.4	47.4	47.4	8.5435	76	76	1	19	0	15.668	47.4	32.9	0	964730000	82190000	34501000	0	2	0	0	16
O75521-2;O75521;F1LLU7;F8WAW4;C9JB63;F8W6J1;C9J000	O75521-2;O75521;F1LLU7;F8WAW4;C9JB63	7;7;5;4;4;2;2	7;7;5;4;4;2;2	7;7;5;4;4;2;2	214430000	186280000	188320000	Enoyl-CoA delta isomerase 2, mitochondrial	ECI2	;;;;	7	7	7	7	6	6	7	6	6	7	6	6	7	30.1	30.1	30.1	39.609	359	359;394;197;140;220;152;227	1	82	0	25.342	22.8	22.8	30.1	2400100000	242440000	181160000	196650000	6	3	5	42
O75530-3;O75530;O75530-2;E9PJK2	O75530-3;O75530;O75530-2	3;3;3;1	3;3;3;1	3;3;3;1	21517000	0	0	Polycomb protein EED	EED	;;	4	3	3	3	2	2	1	2	2	1	2	2	1	8.5	8.5	8.5	45.524	400	400;441;466;361	1	21	0	3.7805	6.2	5.8	2.2	196400000	16087000	21947000	1567200	1	0	0	6
O75531	O75531	6	6	6	550790000	649280000	658960000	Barrier-to-autointegration factor;Barrier-to-autointegration factor, N-terminally processed	BANF1		1	6	6	6	5	5	6	5	5	6	5	5	6	66.3	66.3	66.3	10.058	89	89	1	96	0	48.311	64	58.4	66.3	7472200000	565520000	486670000	573930000	3	2	5	38
O75533;H7C341;B4DGZ4;O75533-2;F8WC19	O75533	41;6;4;4;1	41;6;4;4;1	41;6;4;4;1	1016600000	897350000	1017200000	Splicing factor 3B subunit 1	SF3B1		5	41	41	41	29	27	28	29	27	28	29	27	28	45.7	45.7	45.7	145.83	1304	1304;241;154;144;37	1	437	0	323.31	32.8	28.2	29.8	12247000000	963590000	774700000	943980000	20	17	18	258
O75534-2;O75534;O75534-3;O75534-4;E9PLT0;E9PKN4;E9PLD4;E9PNG3	O75534-2;O75534;O75534-3;O75534-4;E9PLT0	18;18;18;18;15;2;2;2	18;18;18;18;15;2;2;2	18;18;18;18;15;2;2;2	289980000	302150000	269110000	Cold shock domain-containing protein E1	CSDE1	;;;;	8	18	18	18	11	15	14	11	15	14	11	15	14	29.2	29.2	29.2	85.746	767	767;798;813;844;668;46;94;136	1	157	0	45.27	19.4	24.4	22.9	3455500000	243590000	327730000	330930000	3	4	4	67
O75569-3;O75569-2;O75569;F8WEG8;G5E9Q4;C9JMM3;B4DJC7	O75569-3;O75569-2;O75569;F8WEG8;G5E9Q4;C9JMM3	5;5;5;3;3;3;2	5;5;5;3;3;3;2	5;5;5;3;3;3;2	22116000	0	0	Interferon-inducible double-stranded RNA-dependent protein kinase activator A	PRKRA	;;;;;	7	5	5	5	2	2	1	2	2	1	2	2	1	24.7	24.7	24.7	31.635	288	288;302;313;95;105;108;200	1	25	0	11.78	10.8	9.4	4.2	281720000	24408000	12639000	9388300	2	2	0	13
O75607	O75607	2	2	2	48537000	42328000	0	Nucleoplasmin-3	NPM3		1	2	2	2	2	2	1	2	2	1	2	2	1	20.8	20.8	20.8	19.343	178	178	1	22	0	35.796	20.8	20.8	9	541300000	48237000	33966000	23056000	1	0	0	7
O75608-2;O75608;E5RGR0;E5RJ48	O75608-2;O75608;E5RGR0	7;7;6;2	7;7;6;2	7;7;6;2	165170000	170250000	164740000	Acyl-protein thioesterase 1	LYPLA1	;;	4	7	7	7	5	5	6	5	5	6	5	5	6	61.2	61.2	61.2	22.875	214	214;230;197;90	1	81	0	82.799	50	49.5	54.7	2135500000	81980000	186730000	170520000	3	5	4	46
O75616;J3QT61;J3QSB2;J3QRV9;O75616-2	O75616;J3QT61;J3QSB2;J3QRV9;O75616-2	5;3;3;3;3	5;3;3;3;3	5;3;3;3;3	65089000	74778000	65332000	GTPase Era, mitochondrial	ERAL1	;;;;	5	5	5	5	3	4	3	3	4	3	3	4	3	14.9	14.9	14.9	48.349	437	437;171;276;284;276	1	44	0	9.0922	7.6	11.7	7.6	796480000	57579000	78150000	57912000	1	1	1	14
O75629	O75629	3	3	3	315300000	174070000	177250000	Protein CREG1	CREG1		1	3	3	3	3	3	3	3	3	3	3	3	3	24.5	24.5	24.5	24.074	220	220	1	72	0	127.5	24.5	24.5	24.5	3505900000	347850000	192840000	237810000	3	3	4	35
O75643;C9JAQ9;O75643-2;B4E0P5	O75643	54;16;16;14	54;16;16;14	54;16;16;14	1137200000	1176900000	1218600000	U5 small nuclear ribonucleoprotein 200 kDa helicase	SNRNP200		4	54	54	54	42	42	42	42	42	42	42	42	42	34.5	34.5	34.5	244.5	2136	2136;625;625;595	1	585	0	323.31	27.6	26.1	26.4	14507000000	992630000	1123800000	1182900000	28	29	24	332
O75663;O75663-2	O75663;O75663-2	14;10	14;10	14;10	283910000	237270000	313710000	TIP41-like protein	TIPRL	;	2	14	14	14	14	9	9	14	9	9	14	9	9	70.2	70.2	70.2	31.444	272	272;178	1	157	0	41.422	70.2	52.2	46	3611000000	365910000	174770000	177850000	9	4	2	67
O75694;E9PF10;O75694-2;D6RA13	O75694;E9PF10;O75694-2	32;31;31;1	32;31;31;1	32;31;31;1	695100000	789570000	760940000	Nuclear pore complex protein Nup155	NUP155	;;	4	32	32	32	23	24	26	23	24	26	23	24	26	33.9	33.9	33.9	155.2	1391	1391;1327;1332;54	1	362	0	252.44	24.4	23.7	26.5	9004700000	668940000	699110000	757240000	11	13	15	168
O75717-2;O75717;F8W7P7;C9JYB3	O75717-2;O75717;F8W7P7	5;5;4;1	5;5;4;1	5;5;4;1	33432000	31346000	34969000	WD repeat and HMG-box DNA-binding protein 1	WDHD1	;;	4	5	5	5	4	5	5	4	5	5	4	5	5	6.3	6.3	6.3	112.7	1006	1006;1129;647;168	1	54	0	7.0001	5.4	6.3	6.3	468790000	18786000	35409000	37997000	1	1	1	16
O75718;C9JP16	O75718;C9JP16	15;13	15;13	15;13	663440000	659760000	701720000	Cartilage-associated protein	CRTAP	;	2	15	15	15	14	13	15	14	13	15	14	13	15	43.9	43.9	43.9	46.561	401	401;358	1	183	0	70.411	40.1	36.2	43.9	8866500000	824420000	577110000	760370000	10	7	9	98
O75746;O75746-2;F8W9J0;H0YFB2;B4DGK6	O75746;O75746-2	14;11;3;3;3	10;7;3;3;3	10;7;3;3;3	91834000	79484000	91768000	Calcium-binding mitochondrial carrier protein Aralar1	SLC25A12	;	5	14	10	10	11	8	8	7	6	5	7	6	5	27.6	21.2	21.2	74.761	678	678;571;87;175;210	1	92	0	21.948	20.9	16.7	16.1	1145000000	105490000	69499000	67443000	4	2	2	40
O75792	O75792	5	5	5	45117000	49777000	0	Ribonuclease H2 subunit A	RNASEH2A		1	5	5	5	5	4	3	5	4	3	5	4	3	22.4	22.4	22.4	33.395	299	299	1	47	0	4.483	22.4	17.1	12.7	662320000	60611000	50945000	45289000	1	1	0	7
O75818-2;O75818;X6RLL4;F8WC38	O75818-2;O75818;X6RLL4	3;3;2;1	3;3;2;1	3;3;2;1	0	0	26624000	Ribonuclease P protein subunit p40	RPP40	;;	4	3	3	3	2	1	2	2	1	2	2	1	2	10.6	10.6	10.6	39.327	340	340;363;303;113	1	25	0	6.5872	6.8	2.6	6.5	222600000	17448000	7010100	22362000	1	1	0	11
O75821;K7EL20;K7ENA8;K7EP16	O75821;K7EL20;K7ENA8	15;12;12;7	15;12;12;7	6;3;6;3	1028300000	969410000	961360000	Eukaryotic translation initiation factor 3 subunit G	EIF3G	;;	4	15	15	6	13	14	13	13	14	13	5	5	5	49.7	49.7	21.9	35.611	320	320;262;289;118	1	190	0	117.62	46.9	49.7	46.9	12023000000	945870000	932730000	1044600000	16	11	10	130
O75822;O75822-3;O75822-2;H0YLP3;H0YGJ7	O75822;O75822-3;O75822-2	14;12;11;5;4	14;12;11;5;4	14;12;11;5;4	708830000	619740000	613570000	Eukaryotic translation initiation factor 3 subunit J	EIF3J	;;	5	14	14	14	11	11	13	11	11	13	11	11	13	53.5	53.5	53.5	29.062	258	258;209;204;117;106	1	171	0	80.901	46.1	41.1	50.8	8164700000	655370000	621860000	739660000	3	7	4	80
O75828	O75828	8	6	6	421750000	391330000	356140000	Carbonyl reductase [NADPH] 3	CBR3		1	8	6	6	8	7	7	6	5	5	6	5	5	36.1	25.6	25.6	30.85	277	277	1	73	0	35.965	36.1	29.6	29.6	5095100000	493680000	316360000	370280000	3	2	3	34
O75844	O75844	12	12	12	599290000	607380000	508500000	CAAX prenyl protease 1 homolog	ZMPSTE24		1	12	12	12	10	9	8	10	9	8	10	9	8	30.5	30.5	30.5	54.812	475	475	1	150	0	72.352	22.9	21.3	18.5	6601600000	538410000	515030000	481060000	7	4	4	76
O75874;C9J4N6;C9JLU6;C9JJE5	O75874	27;12;7;5	27;12;7;5	27;12;7;5	4647700000	4622700000	4766700000	Isocitrate dehydrogenase [NADP] cytoplasmic	IDH1		4	27	27	27	26	25	25	26	25	25	26	25	25	73.9	73.9	73.9	46.659	414	414;157;73;62	1	457	0	287.77	71.3	67.9	67.9	57697000000	4739500000	4326300000	4647700000	28	25	23	318
O75915;F8WF90;C9JQU6;F8WF33	O75915;F8WF90;C9JQU6;F8WF33	4;2;2;2	4;2;2;2	4;2;2;2	256620000	310640000	330350000	PRA1 family protein 3	ARL6IP5	;;;	4	4	4	4	4	4	3	4	4	3	4	4	3	24.5	24.5	24.5	21.614	188	188;59;88;93	1	68	0	59.166	24.5	24.5	19.7	3649200000	276350000	320180000	302040000	5	4	1	50
O75934	O75934	7	7	7	216880000	217440000	180520000	Pre-mRNA-splicing factor SPF27	BCAS2		1	7	7	7	5	6	7	5	6	7	5	6	7	48	48	48	26.131	225	225	1	82	0	34.506	38.7	40.9	48	2721500000	212970000	275360000	200710000	4	4	5	39
O75937;S4R3J5	O75937	12;2	12;2	12;2	635160000	785760000	866960000	DnaJ homolog subfamily C member 8	DNAJC8		2	12	12	12	10	12	10	10	12	10	10	12	10	55.7	55.7	55.7	29.841	253	253;106	1	178	0	158.17	41.1	55.7	44.3	8948300000	563220000	792070000	913710000	8	10	9	101
O75940	O75940	2	2	2	29366000	0	33602000	Survival of motor neuron-related-splicing factor 30	SMNDC1		1	2	2	2	2	1	2	2	1	2	2	1	2	20.2	20.2	20.2	26.711	238	238	1	21	0.00027137	3.7423	20.2	11.3	20.2	388470000	29381000	18738000	35497000	1	1	1	11
O75947;O75947-2;F5H608	O75947;O75947-2;F5H608	12;10;6	12;10;6	12;10;6	985660000	1052800000	999600000	ATP synthase subunit d, mitochondrial	ATP5H	;;	3	12	12	12	10	10	10	10	10	10	10	10	10	83.2	83.2	83.2	18.491	161	161;137;81	1	151	0	67.915	74.5	77	77	11973000000	1120700000	892750000	944130000	10	7	8	102
O75955;B4DVY7;A2AB09;A2AB12;A2AB10;A2AB13;A2AB11;A2ABJ5	O75955;B4DVY7;A2AB09;A2AB12;A2AB10	9;8;6;5;5;4;4;1	9;8;6;5;5;4;4;1	9;8;6;5;5;4;4;1	178790000	203950000	224950000	Flotillin-1	FLOT1	;;;;	8	9	9	9	8	8	9	8	8	9	8	8	9	28.3	28.3	28.3	47.355	427	427;379;238;235;252;185;192;145	1	118	0	41.709	25.1	25.1	28.3	2413300000	184520000	200160000	200630000	4	3	3	43
O75962-2;O75962;O75962-5;O75962-4;E7EWP2;E7EPJ7;F5H228;O75962-3	O75962-2;O75962;O75962-5;O75962-4;E7EWP2;E7EPJ7;F5H228	8;8;7;7;6;6;4;1	8;8;7;7;6;6;4;1	8;8;7;7;6;6;4;1	104390000	126710000	123430000	Triple functional domain protein	TRIO	;;;;;;	8	8	8	8	6	6	4	6	6	4	6	6	4	3	3	3	329.39	2921	2921;3097;2563;3038;2309;2546;1508;596	1	66	0	11.103	2.2	2.2	1.4	1668400000	112400000	122920000	111600000	5	1	2	29
O75964;E9PN17	O75964;E9PN17	6;5	6;5	6;5	725540000	630740000	543630000	ATP synthase subunit g, mitochondrial	ATP5L	;	2	6	6	6	6	5	6	6	5	6	6	5	6	52.4	52.4	52.4	11.428	103	103;76	1	99	0	38.994	52.4	51.5	52.4	7825200000	800330000	511490000	539010000	7	2	3	56
O75976-2;O75976;J3QRJ9;J3QQJ4	O75976-2;O75976	4;4;1;1	4;4;1;1	4;4;1;1	16919000	0	22905000	Carboxypeptidase D	CPD	;	4	4	4	4	2	1	2	2	1	2	2	1	2	4.1	4.1	4.1	126.49	1133	1133;1380;82;184	1	28	0	5.9916	2	1	2.3	245350000	11906000	12309000	11889000	1	0	0	10
O76003	O76003	16	16	16	1435200000	1369100000	1346500000	Glutaredoxin-3	GLRX3		1	16	16	16	13	13	11	13	13	11	13	13	11	54.9	54.9	54.9	37.432	335	335	1	228	0	250.62	43.3	46.9	34.9	17229000000	1295100000	1182600000	1158100000	9	10	11	135
O76031;H0YM48;H0YK07	O76031	14;3;2	14;3;2	14;3;2	179530000	227540000	216680000	ATP-dependent Clp protease ATP-binding subunit clpX-like, mitochondrial	CLPX		3	14	14	14	13	10	10	13	10	10	13	10	10	33.2	33.2	33.2	69.223	633	633;268;130	1	138	0	30.139	28.9	20.2	20.5	2496300000	228170000	192570000	209970000	5	5	6	46
O76070;F8W754	O76070	5;1	5;1	5;1	73139000	90052000	125460000	Gamma-synuclein	SNCG		2	5	5	5	4	3	4	4	3	4	4	3	4	42.5	42.5	42.5	13.331	127	127;126	1	40	0	12.382	35.4	33.9	35.4	833350000	49014000	48566000	63746000	0	1	2	7
O76071	O76071	9	9	9	130810000	133710000	133020000	Probable cytosolic iron-sulfur protein assembly protein CIAO1	CIAO1		1	9	9	9	8	8	7	8	8	7	8	8	7	38.6	38.6	38.6	37.84	339	339	1	91	0	17.461	36	35.1	28.6	1698400000	158490000	149240000	148260000	7	6	1	38
O76094;O76094-2;D6RDY6;R4GNC1	O76094;O76094-2	26;24;12;9	26;24;12;9	26;24;12;9	881080000	851570000	885620000	Signal recognition particle subunit SRP72	SRP72	;	4	26	26	26	20	20	21	20	20	21	20	20	21	51.6	51.6	51.6	74.605	671	671;610;357;220	1	287	0	242.12	39.3	38.7	40.8	10699000000	819250000	815370000	927170000	13	13	15	138
O94760;B4DYP1;B4DGT0;O94760-2	O94760;B4DYP1;B4DGT0;O94760-2	10;6;6;6	10;6;6;6	9;5;5;5	247430000	221380000	257940000	N(G),N(G)-dimethylarginine dimethylaminohydrolase 1	DDAH1	;;;	4	10	10	9	7	6	7	7	6	7	6	5	6	41.1	41.1	38.2	31.121	285	285;185;192;182	1	106	0	20.593	28.1	23.9	28.1	3094500000	308770000	270750000	335920000	4	3	6	52
O94766;G3V150;B7ZAB3;E9PNA1;Q9NPZ5	O94766;G3V150;B7ZAB3	5;4;4;2;1	5;4;4;2;1	5;4;4;2;1	35802000	0	36960000	Galactosylgalactosylxylosylprotein 3-beta-glucuronosyltransferase 3	B3GAT3	;;	5	5	5	5	3	1	3	3	1	3	3	1	3	21.5	21.5	21.5	37.121	335	335;319;315;223;323	1	32	0	9.809	14.3	4.2	14.3	424060000	37328000	10974000	41867000	2	1	3	19
O94776;O94776-2	O94776;O94776-2	17;9	17;9	17;9	468620000	502710000	493730000	Metastasis-associated protein MTA2	MTA2	;	2	17	17	17	15	15	15	15	15	15	15	15	15	33.5	33.5	33.5	75.022	668	668;495	1	189	0	58.807	29.6	28.6	28.1	5970700000	504040000	479020000	479890000	9	9	8	101
O94804;H0YB71	O94804	5;2	3;1	3;1	27273000	22534000	23496000	Serine/threonine-protein kinase 10	STK10		2	5	3	3	5	4	5	3	3	3	3	3	3	5.6	3.5	3.5	112.13	968	968;281	1	28	0	4.6786	5.6	4.4	5.6	270400000	27861000	25124000	23968000	0	2	1	7
O94808;E5RJP4	O94808	12;5	5;2	5;2	0	27670000	0	Glutamine--fructose-6-phosphate aminotransferase [isomerizing] 2	GFPT2		2	12	5	5	8	8	8	1	3	3	1	3	3	25.4	12.2	12.2	76.93	682	682;216	1	25	0	10.292	15.2	16.4	16.7	236410000	11784000	38711000	28615000	1	1	1	11
O94826	O94826	24	24	24	686380000	767600000	745730000	Mitochondrial import receptor subunit TOM70	TOMM70A		1	24	24	24	21	18	21	21	18	21	21	18	21	56.9	56.9	56.9	67.454	608	608	1	273	0	108.81	50.7	42.4	47	8759000000	772400000	667900000	740730000	12	12	11	134
O94855;O94855-2;E9PDM8;E9PC44	O94855;O94855-2;E9PDM8;E9PC44	21;21;18;14	21;21;18;14	21;21;18;14	531280000	511030000	519210000	Protein transport protein Sec24D	SEC24D	;;;	4	21	21	21	18	15	16	18	15	16	18	15	16	27	27	27	113.01	1032	1032;1033;663;393	1	228	0	83.493	22.8	19.7	21.6	6726500000	620580000	499140000	585970000	10	6	8	72
O94874;O94874-2;O94874-3	O94874;O94874-2;O94874-3	17;16;13	17;16;13	17;16;13	191310000	150200000	160220000	E3 UFM1-protein ligase 1	UFL1	;;	3	17	17	17	13	12	11	13	12	11	13	12	11	27.7	27.7	27.7	89.594	794	794;729;509	1	128	0	25.719	21.9	20.2	18.9	1990300000	247280000	181030000	202160000	7	3	4	49
O94875-7;O94875;O94875-11;H7BXR3;O94875-9;O94875-5;O94875-3;O94875-8;O94875-2;O94875-4;O94875-12;O94875-10;H7C1R7;H7BZK1;H7BZX1;O94875-6	O94875-7;O94875;O94875-11;H7BXR3;O94875-9;O94875-5;O94875-3;O94875-8;O94875-2;O94875-4;O94875-12;O94875-10;H7C1R7	5;5;5;4;4;4;4;4;4;4;4;4;3;2;1;1	5;5;5;4;4;4;4;4;4;4;4;4;3;2;1;1	5;5;5;4;4;4;4;4;4;4;4;4;3;2;1;1	78531000	76692000	75424000	Sorbin and SH3 domain-containing protein 2	SORBS2	;;;;;;;;;;;;	16	5	5	5	3	4	4	3	4	4	3	4	4	6.4	6.4	6.4	113.55	1004	1004;1100;1200;636;644;645;645;661;666;691;731;824;291;291;253;156	1	44	0	6.5784	4.2	5.3	5.3	1007800000	80621000	79139000	87411000	0	0	1	11
O94888;F8WB69;C9JAT7;F5GYB1	O94888;F8WB69;C9JAT7;F5GYB1	2;1;1;1	2;1;1;1	2;1;1;1	27454000	0	0	UBX domain-containing protein 7	UBXN7	;;;	4	2	2	2	2	1	1	2	1	1	2	1	1	5.3	5.3	5.3	54.862	489	489;75;327;341	1	16	0.000258	3.0637	5.3	2.7	2.7	301920000	17831000	38223000	16841000	0	0	1	5
O94903;E5RFX7;E5RG77;H0YBG2;E5RFZ4	O94903;E5RFX7;E5RG77	5;4;4;2;1	5;4;4;2;1	5;4;4;2;1	65705000	60739000	65616000	Proline synthase co-transcribed bacterial homolog protein	PROSC	;;	5	5	5	5	3	2	3	3	2	3	3	2	3	24.7	24.7	24.7	30.344	275	275;137;152;128;74	1	34	0	11.33	16.7	10.5	16.7	753080000	72710000	47629000	71251000	3	2	1	25
O94906;O94906-2	O94906;O94906-2	24;23	24;23	24;23	282510000	324710000	336090000	Pre-mRNA-processing factor 6	PRPF6	;	2	24	24	24	17	14	14	17	14	14	17	14	14	27.9	27.9	27.9	106.92	941	941;901	1	183	0	51.209	20.4	16.5	16.5	3619900000	373050000	292000000	294610000	3	3	3	44
O94925-3;B8ZZA8;B8ZZC5	O94925-3	19;5;4	19;5;4	3;3;3	942480000	1011300000	1069300000	Glutaminase kidney isoform, mitochondrial	GLS		3	19	19	3	16	16	18	16	16	18	2	3	3	43.6	43.6	6.9	65.459	598	598;169;103	1	265	0	193.35	39.6	39.1	43.6	12692000000	1115000000	807200000	1034300000	13	12	13	159
O94973;O94973-2;O94973-3;E9PR62;H0YDE9;H0YEG0;E9PQP4;E9PPY8	O94973;O94973-2;O94973-3	20;20;16;6;4;4;3;2	10;10;6;3;2;2;2;1	10;10;6;3;2;2;2;1	120400000	171300000	174660000	AP-2 complex subunit alpha-2	AP2A2	;;	8	20	10	10	17	17	15	9	9	7	9	9	7	28.6	16.2	16.2	103.96	939	939;940;656;378;184;185;90;138	1	97	0	40.346	25.1	25.1	22.8	2107500000	154180000	204090000	140440000	2	7	7	52
O94992;Q96MH2	O94992	8;1	8;1	8;1	121940000	129680000	119670000	Protein HEXIM1	HEXIM1		2	8	8	8	6	5	6	6	5	6	6	5	6	32.9	32.9	32.9	40.623	359	359;286	1	69	0	17.558	26.2	18.4	26.2	1644300000	142580000	122620000	133640000	2	1	1	23
O95084;B4E2J3;E9PRR2	O95084;B4E2J3	7;6;1	7;6;1	7;6;1	177730000	142420000	149870000	Serine protease 23	PRSS23	;	3	7	7	7	6	5	7	6	5	7	6	5	7	34.7	34.7	34.7	43.001	383	383;351;154	1	75	0	17.009	26.9	22.5	34.7	2008700000	169200000	124480000	189850000	2	2	2	35
O95104-2;O95104-3;O95104	O95104-2;O95104-3;O95104	4;4;4	4;4;4	1;1;1	59263000	53213000	48781000	Splicing factor, arginine/serine-rich 15	SCAF4	;;	3	4	4	1	4	3	3	4	3	3	1	0	0	3.5	3.5	1.2	123.64	1125	1125;1132;1147	1	42	0	5.3716	3.5	2.3	2.3	667780000	59251000	48163000	46593000	2	0	0	11
O95140;O95140-2;Q5JXC5	O95140;O95140-2	8;6;1	8;6;1	8;6;1	69222000	71357000	68059000	Mitofusin-2	MFN2	;	3	8	8	8	5	4	6	5	4	6	5	4	6	12.4	12.4	12.4	86.401	757	757;436;98	1	70	0	12.062	7.9	5.9	9.5	840470000	54301000	57637000	75460000	1	1	2	25
O95155-2;O95155;O95155-4;O95155-3;K7EP75;K7ERA7;B1AQ61	O95155-2;O95155;O95155-4;O95155-3	15;15;15;12;4;1;1	15;15;15;12;4;1;1	15;15;15;12;4;1;1	159480000	193560000	143170000	Ubiquitin conjugation factor E4 B	UBE4B	;;;	7	15	15	15	10	9	11	10	9	11	10	9	11	19.7	19.7	19.7	133.27	1173	1173;1302;1353;1061;276;98;100	1	132	0	30.404	11.5	9.6	14.2	2008000000	162050000	161980000	171980000	3	4	2	34
O95159;E9PMQ3;E9PQA5;E9PQ47;E9PNY1;H0YCU8;E9PJX1;E9PJ47	O95159;E9PMQ3;E9PQA5;E9PQ47;E9PNY1	4;2;2;2;2;1;1;1	4;2;2;2;2;1;1;1	4;2;2;2;2;1;1;1	39605000	0	0	Zinc finger protein-like 1	ZFPL1	;;;;	8	4	4	4	3	1	1	3	1	1	3	1	1	14.8	14.8	14.8	34.114	310	310;109;172;188;207;53;65;80	1	21	0	3.8217	11.6	2.9	2.9	385180000	39317000	24986000	22884000	1	1	1	14
O95163;F5H2T0;H0YDF3	O95163;F5H2T0	27;23;5	27;23;5	27;23;5	481310000	442900000	436210000	Elongator complex protein 1	IKBKAP	;	3	27	27	27	23	18	16	23	18	16	23	18	16	29.8	29.8	29.8	150.25	1332	1332;983;346	1	252	0	110.02	26.5	17.9	15.8	5722600000	569430000	376940000	412310000	5	9	9	94
O95197-3;O95197-5;O95197-4;O95197-7;O95197-2;O95197;B7Z4M1;F5H617;O95197-6;F5H891;F5GWG7	O95197-3;O95197-5;O95197-4;O95197-7;O95197-2;O95197;B7Z4M1;F5H617;O95197-6	4;3;3;3;3;3;2;2;2;1;1	4;3;3;3;3;3;2;2;2;1;1	4;3;3;3;3;3;2;2;2;1;1	739870000	1058800000	863100000	Reticulon-3;Reticulon	RTN3	;;;;;;;;	11	4	4	4	4	3	2	4	3	2	4	3	2	39	39	39	25.609	236	236;241;255;920;1013;1032;123;185;214;130;136	1	49	0	30.536	39	22.5	11	10835000000	792060000	897270000	822550000	4	3	2	32
O95202;O95202-2;O95202-3	O95202	16;3;3	16;3;3	16;3;3	428940000	460740000	447090000	LETM1 and EF-hand domain-containing protein 1, mitochondrial	LETM1		3	16	16	16	13	14	13	13	14	13	13	14	13	29	29	29	83.353	739	739;254;294	1	170	0	80.197	25	27.5	25.2	5459000000	417140000	504090000	384520000	7	6	5	75
O95218-2;O95218	O95218-2;O95218	7;7	7;7	7;7	140100000	166130000	168790000	Zinc finger Ran-binding domain-containing protein 2	ZRANB2	;	2	7	7	7	7	7	7	7	7	7	7	7	7	24.4	24.4	24.4	36.318	320	320;330	1	107	0	13.091	24.4	24.4	24.4	1900200000	184420000	191050000	182760000	3	7	4	50
O95239;O95239-2;Q2VIQ3	O95239;O95239-2;Q2VIQ3	4;3;2	4;3;2	3;2;1	13563000	0	23581000	Chromosome-associated kinesin KIF4A;Chromosome-associated kinesin KIF4B	KIF4A;KIF4B	;;	3	4	4	3	2	1	2	2	1	2	2	1	2	3.2	3.2	2.3	139.88	1232	1232;1127;1234	1	34	0.0017592	2.7148	1.4	0.6	1.4	405590000	11656000	6875800	17106000	1	0	1	5
O95274	O95274	1	1	1	41547000	37634000	37153000	Ly6/PLAUR domain-containing protein 3	LYPD3		1	1	1	1	1	1	1	1	1	1	1	1	1	3.2	3.2	3.2	35.97	346	346	1	22	0.0040767	2.2089	3.2	3.2	3.2	414580000	45121000	34125000	35797000	1	1	1	8
O95292;E5RK64;O95292-2	O95292	11;3;3	10;2;2	10;2;2	734010000	723160000	662630000	Vesicle-associated membrane protein-associated protein B/C	VAPB		3	11	10	10	10	8	9	9	7	8	9	7	8	50.2	50.2	50.2	27.228	243	243;71;99	1	126	0	32.78	49.4	33.3	41.6	8820200000	752640000	684000000	704970000	7	7	6	83
O95295	O95295	3	3	3	44006000	0	0	SNARE-associated protein Snapin	SNAPIN		1	3	3	3	3	0	1	3	0	1	3	0	1	34.6	34.6	34.6	14.874	136	136	1	17	0	30.447	34.6	0	10.3	261490000	44006000	0	5826500	1	0	0	7
O95297-4;O95297-2;O95297;Q9UEL6;O95297-5;O95297-3	O95297-4;O95297-2;O95297	4;4;4;1;1;1	4;4;4;1;1;1	4;4;4;1;1;1	97695000	118460000	116850000	Myelin protein zero-like protein 1	MPZL1	;;	6	4	4	4	3	3	4	3	3	4	3	3	4	33.8	33.8	33.8	15.947	145	145;268;269;183;119;209	1	42	0	10.914	26.9	26.9	33.8	1379100000	61232000	133790000	97778000	3	1	1	24
O95302;O95302-3;B7Z230;O95302-2;C9J4P8;Q75LS8	O95302;O95302-3;B7Z230	15;14;11;7;6;1	14;14;11;7;6;1	14;14;11;7;6;1	419120000	414980000	491830000	Peptidyl-prolyl cis-trans isomerase FKBP9	FKBP9	;;	6	15	14	14	14	13	11	13	12	10	13	12	10	38.2	37	37	63.083	570	570;623;432;338;225;142	1	138	0	99.174	34.9	32.8	27.5	5140800000	491230000	324670000	417740000	9	7	5	73
O95336;M0R261;M0R1L2;M0R0U3	O95336;M0R261;M0R1L2;M0R0U3	12;9;6;6	12;9;6;6	12;9;6;6	943880000	830820000	847370000	6-phosphogluconolactonase	PGLS	;;;	4	12	12	12	12	12	12	12	12	12	12	12	12	65.5	65.5	65.5	27.547	258	258;216;147;179	1	211	0	59.039	65.5	65.5	65.5	11077000000	946720000	730450000	792770000	8	8	9	117
O95347;O95347-2;Q5T821	O95347;O95347-2	32;30;5	32;30;5	32;30;5	546760000	550280000	497360000	Structural maintenance of chromosomes protein 2	SMC2	;	3	32	32	32	24	24	23	24	24	23	24	24	23	31.7	31.7	31.7	135.65	1197	1197;1099;145	1	295	0	101.68	23.4	24.1	23	6437000000	557670000	521520000	509190000	11	7	6	105
O95352;O95352-3;O95352-2;H7C059;C9JFF4;C9J415;H7C369;C9JNU2;C9JKA3;H7C2R3;H7BZ92;C9JE55;H7C2J8	O95352;O95352-3;O95352-2	13;12;12;3;3;2;1;1;1;1;1;1;1	13;12;12;3;3;2;1;1;1;1;1;1;1	13;12;12;3;3;2;1;1;1;1;1;1;1	99772000	131830000	115060000	Ubiquitin-like modifier-activating enzyme ATG7	ATG7	;;	13	13	13	13	10	7	10	10	7	10	10	7	10	25.2	25.2	25.2	77.959	703	703;623;676;105;176;152;77;89;93;95;96;126;139	1	117	0	32.41	17.9	12.1	17.5	1478000000	102680000	86734000	128520000	6	3	6	40
O95372;Q5QPQ0;Q5QPQ1;Q5QPQ3;Q5QPQ2;E7EPS4;Q5QPN9;Q5QPN5	O95372;Q5QPQ0;Q5QPQ1;Q5QPQ3;Q5QPQ2	7;5;4;4;4;3;3;2	7;5;4;4;4;3;3;2	7;5;4;4;4;3;3;2	587940000	608440000	552760000	Acyl-protein thioesterase 2	LYPLA2	;;;;	8	7	7	7	5	6	6	5	6	6	5	6	6	48.1	48.1	48.1	24.737	231	231;164;162;180;182;134;137;90	1	120	0	126.63	33.8	37.2	44.6	7430300000	533740000	510610000	458720000	3	5	8	68
O95373;E9PLB2;E9PLJ0	O95373	32;3;2	32;3;2	31;3;2	2565500000	2658000000	2686800000	Importin-7	IPO7		3	32	32	31	28	25	22	28	25	22	27	24	21	41.1	41.1	40.2	119.52	1038	1038;130;64	1	473	0	323.31	33.5	29.1	24	31397000000	2638400000	2625200000	2537300000	27	32	27	323
O95376	O95376	5	5	5	49944000	58450000	0	E3 ubiquitin-protein ligase ARIH2	ARIH2		1	5	5	5	3	3	1	3	3	1	3	3	1	15.4	15.4	15.4	57.818	493	493	1	42	0	13.956	8.1	8.1	1.4	610710000	48985000	49208000	8064500	2	0	0	14
O95394;O95394-3;O95394-4;J3KN95;D6RCQ8;D6RF77;D6RIS6;H0Y987;D6RCD1;H0Y8I3;D6RC77	O95394;O95394-3;O95394-4;J3KN95	22;22;21;16;8;7;6;5;4;4;4	22;22;21;16;8;7;6;5;4;4;4	22;22;21;16;8;7;6;5;4;4;4	1081500000	1119700000	1117900000	Phosphoacetylglucosamine mutase	PGM3	;;;	11	22	22	22	19	20	18	19	20	18	19	20	18	52.4	52.4	52.4	59.851	542	542;566;570;461;146;156;172;197;71;113;114	1	283	0	119.46	45	48.2	41.9	13570000000	1080900000	1076500000	995270000	12	11	13	157
O95400	O95400	4	4	4	0	145280000	127150000	CD2 antigen cytoplasmic tail-binding protein 2	CD2BP2		1	4	4	4	1	4	3	1	4	3	1	4	3	14.1	14.1	14.1	37.646	341	341	1	36	0	6.9436	3.2	14.1	10.9	1289500000	11930000	136840000	111880000	0	2	0	8
O95433;B4DUR9;G3V438;H0YJG7;G3V3W9;H0YJU2;H0YJ63;H0YJG6	O95433;B4DUR9;G3V438	15;11;8;7;5;5;3;3	15;11;8;7;5;5;3;3	15;11;8;7;5;5;3;3	734990000	751010000	670310000	Activator of 90 kDa heat shock protein ATPase homolog 1	AHSA1	;;	8	15	15	15	12	11	13	12	11	13	12	11	13	64.5	64.5	64.5	38.274	338	338;288;203;216;100;133;90;120	1	186	0	115.21	50.3	50.9	54.1	9044400000	939890000	709650000	706190000	12	9	6	107
O95456-2;O95456;F8WBH7	O95456-2;O95456	8;8;2	8;8;2	8;8;2	318220000	246800000	293320000	Proteasome assembly chaperone 1	PSMG1	;	3	8	8	8	5	6	5	5	6	5	5	6	5	46.1	46.1	46.1	30.288	267	267;288;63	1	104	0	28.092	33.3	30	26.2	3763300000	281400000	223780000	292480000	5	2	2	44
O95466-2;O95466;O95466-3;K7EK60;K7EJE6	O95466-2;O95466;O95466-3;K7EK60	13;12;12;8;6	13;12;12;8;6	13;12;12;8;6	115390000	128920000	135720000	Formin-like protein 1	FMNL1	;;;	5	13	13	13	4	6	8	4	6	8	4	6	8	15.4	15.4	15.4	122.41	1104	1104;1100;1158;682;488	1	77	0	22.29	4.6	7.5	10.3	1564900000	67284000	126500000	174860000	1	2	4	29
O95470;H0Y3V8;H7BXL7	O95470	5;2;2	5;2;2	5;2;2	109060000	106510000	113990000	Sphingosine-1-phosphate lyase 1	SGPL1		3	5	5	5	4	3	3	4	3	3	4	3	3	12.5	12.5	12.5	63.523	568	568;135;202	1	50	0	8.3336	8.1	5.1	5.1	1320000000	133020000	145050000	134490000	4	0	1	16
O95486;O95486-2	O95486	15;3	15;3	14;3	320870000	254300000	268750000	Protein transport protein Sec24A	SEC24A		2	15	15	14	13	10	13	13	10	13	12	10	13	17.2	17.2	16.5	119.75	1093	1093;613	1	168	0	45.887	15	12.3	15.5	3533400000	343480000	184710000	247470000	6	4	7	69
O95487-2;O95487;O95487-3	O95487-2;O95487;O95487-3	7;7;7	6;6;6	6;6;6	41887000	53420000	53905000	Protein transport protein Sec24B	SEC24B	;;	3	7	6	6	6	4	2	5	4	2	5	4	2	8	7.4	7.4	133.63	1233	1233;1268;1298	1	51	0	8.8567	7.1	4.4	1.7	554190000	66835000	53919000	28020000	3	2	1	19
O95544;O95544-2;O95544-3	O95544;O95544-2;O95544-3	3;3;2	3;3;2	3;3;2	0	31093000	49841000	NAD kinase	NADK	;;	3	3	3	3	2	2	2	2	2	2	2	2	2	9	9	9	49.228	446	446;591;423	1	24	0	4.2554	6.5	5.6	5.6	360610000	31552000	27722000	36923000	1	0	2	4
O95551;O95551-2;X6R5A3;O95551-3	O95551;O95551-2;X6R5A3;O95551-3	6;6;4;4	6;6;4;4	6;6;4;4	62272000	64861000	73175000	Tyrosyl-DNA phosphodiesterase 2	TDP2	;;;	4	6	6	6	5	6	5	5	6	5	5	6	5	25.4	25.4	25.4	40.929	362	362;392;304;284	1	57	0	30.497	20.2	25.4	20.2	807390000	67633000	76247000	74696000	1	3	2	27
O95571;M0QXB5;M0QY80;M0QX80	O95571;M0QXB5	12;11;3;1	12;11;3;1	12;11;3;1	388310000	386880000	342330000	Persulfide dioxygenase ETHE1, mitochondrial	ETHE1	;	4	12	12	12	11	11	9	11	11	9	11	11	9	74.4	74.4	74.4	27.873	254	254;260;95;51	1	152	0	74.97	70.5	70.5	55.5	4767100000	425870000	302810000	294180000	7	10	2	78
O95573;H7BYZ7;H7C260;F5GWH2;F5H062;C9JC11	O95573	32;7;7;5;3;2	32;7;7;5;3;2	30;6;7;5;3;2	1920500000	1774100000	1936000000	Long-chain-fatty-acid--CoA ligase 3	ACSL3		6	32	32	30	29	28	29	29	28	29	27	26	27	58.9	58.9	54.9	80.419	720	720;179;213;141;95;88	1	460	0	300.88	54.3	52.2	53.8	24093000000	2090900000	1834300000	1851900000	24	26	23	252
O95630;C9JK83	O95630;C9JK83	4;2	4;2	4;2	40995000	38739000	37072000	STAM-binding protein	STAMBP	;	2	4	4	4	3	3	2	3	3	2	3	3	2	10.1	10.1	10.1	48.076	424	424;318	1	37	0	8.2457	8.3	8.3	6.6	469050000	51609000	36554000	25856000	2	3	2	30
O95684-2;O95684;O95684-3;Q8N103-3	O95684-2;O95684;O95684-3	4;4;2;1	4;4;2;1	4;4;2;1	37750000	31477000	42339000	FGFR1 oncogene partner	FGFR1OP	;;	4	4	4	4	4	3	3	4	3	3	4	3	3	18.5	18.5	18.5	40.907	379	379;399;149;522	1	37	0	7.0808	18.5	15	15	479570000	50871000	25129000	36903000	0	2	2	13
O95747	O95747	18	18	5	959380000	889130000	896130000	Serine/threonine-protein kinase OSR1	OXSR1		1	18	18	5	15	16	15	15	16	15	3	4	4	41.4	41.4	12.1	58.022	527	527	1	212	0	142.87	34.9	37	32.3	11243000000	896100000	812300000	857820000	12	10	8	123
O95758-1;O95758-6;O95758-2;O95758;O95758-5;O95758-4;O95758-7	O95758-1;O95758-6;O95758-2;O95758;O95758-5;O95758-4;O95758-7	6;6;6;6;6;6;5	3;3;3;3;3;3;3	3;3;3;3;3;3;3	67181000	72661000	62082000	Polypyrimidine tract-binding protein 3	PTBP3	;;;;;;	7	6	3	3	6	6	6	3	3	3	3	3	3	20.3	15.5	15.5	56.501	521	521;524;547;552;555;558;457	1	30	0	29.431	20.3	20.3	20.3	819620000	74207000	75093000	70433000	0	1	3	16
O95777;F2Z2Y6;C9JIZ0;C9JNV3	O95777;F2Z2Y6;C9JIZ0;C9JNV3	7;5;5;4	7;5;5;4	7;5;5;4	213110000	200470000	231420000	U6 snRNA-associated Sm-like protein LSm8	LSM8	;;;	4	7	7	7	6	5	5	6	5	5	6	5	5	99	99	99	10.403	96	96;67;75;77	1	70	0	39.577	79.2	63.5	63.5	2390300000	192750000	188210000	202940000	4	2	4	39
O95782-2;O95782;M0R2D9;E9PPZ3;E9PS94;E9PNC4	O95782-2;O95782	36;36;1;1;1;1	36;36;1;1;1;1	26;26;0;0;0;0	1533800000	1347600000	1557500000	AP-2 complex subunit alpha-1	AP2A1	;	6	36	36	26	29	29	30	29	29	30	21	21	22	46.7	46.7	35.4	105.36	955	955;977;57;60;62;125	1	439	0	197.61	39.6	39.1	41.6	17894000000	1531300000	1176600000	1518000000	24	21	25	256
O95786;O95786-2;B3KWW1;A2A376;F5H5W6	O95786;O95786-2;B3KWW1;A2A376;F5H5W6	46;43;42;37;24	46;43;42;37;24	46;43;42;37;24	4924200000	4197100000	4300600000	Probable ATP-dependent RNA helicase DDX58	DDX58	;;;;	5	46	46	46	43	43	41	43	43	41	43	43	41	52	52	52	106.6	925	925;880;854;722;536	1	733	0	323.31	49.1	49.1	46.8	57484000000	5041100000	4191000000	3985400000	36	38	33	451
O95816;B4DXE2;A2A296	O95816;B4DXE2	11;10;5	11;10;5	11;10;5	607190000	617310000	639700000	BAG family molecular chaperone regulator 2	BAG2	;	3	11	11	11	9	10	9	9	10	9	9	10	9	62.6	62.6	62.6	23.772	211	211;178;108	1	138	0	116.63	55	55	48.3	7214900000	570040000	538960000	564810000	8	8	7	86
O95817;C9JFK9	O95817;C9JFK9	15;11	15;11	15;11	268810000	230160000	224980000	BAG family molecular chaperone regulator 3	BAG3	;	2	15	15	15	12	13	13	12	13	13	12	13	13	36.9	36.9	36.9	61.594	575	575;325	1	148	0	40.437	27.8	31.5	29.9	2781400000	282350000	241200000	236100000	5	9	7	57
O95831-3;O95831;O95831-2;E9PMA0;O95831-5;O95831-6;O95831-4	O95831-3;O95831;O95831-2;E9PMA0;O95831-5	20;20;12;11;10;8;8	20;20;12;11;10;8;8	20;20;12;11;10;8;8	1146100000	1042200000	1140500000	Apoptosis-inducing factor 1, mitochondrial	AIFM1	;;;;	7	20	20	20	16	17	16	16	17	16	16	17	16	44.7	44.7	44.7	66.294	609	609;613;326;274;261;237;324	1	242	0	76.386	34.2	36.8	35.6	13106000000	1147400000	1054800000	1025800000	10	8	10	124
O95833;Q5SQ17	O95833;Q5SQ17	8;5	8;5	8;5	162430000	139640000	121650000	Chloride intracellular channel protein 3	CLIC3	;	2	8	8	8	5	4	5	5	4	5	5	4	5	40.7	40.7	40.7	26.648	236	236;167	1	93	0	24.018	26.7	17.8	22.9	1725000000	160950000	98405000	100910000	4	4	2	43
O95834;O95834-2;O95834-3;C9JRL6;K7EIK7;K7EKU5;K7EIM1;K7ELI8;K7EQR0;K7ERY9;K7EKG3;K7ERR2;K7EII6;G3V500;G3V3N9;F8W717;Q05BV3-4;O00423;O00423-3	O95834;O95834-2;O95834-3;C9JRL6;K7EIK7	10;10;10;9;9;4;3;3;3;3;3;2;2;1;1;1;1;1;1	10;10;10;9;9;4;3;3;3;3;3;2;2;1;1;1;1;1;1	9;9;9;8;8;3;2;3;2;2;3;1;2;0;0;0;0;0;0	160630000	121800000	163700000	Echinoderm microtubule-associated protein-like 2	EML2	;;;;	19	10	10	9	7	8	7	7	8	7	6	7	6	21	21	19.7	70.678	649	649;796;850;603;773;225;111;121;133;148;223;98;181;285;379;803;622;815;834	1	94	0	34.016	16.3	17.6	14.6	1803200000	197220000	108200000	151880000	5	3	4	35
O95861;O95861-4;O95861-2;A6NF51;F8W1J0;F8VVW8;F8VZG4	O95861;O95861-4;O95861-2;A6NF51	14;13;13;12;6;5;5	14;13;13;12;6;5;5	4;4;4;4;4;4;4	740170000	684020000	779280000	3(2),5-bisphosphate nucleotidase 1	BPNT1	;;;	7	14	14	4	12	13	12	12	13	12	3	3	3	54.2	54.2	14.3	33.392	308	308;272;325;291;170;128;136	1	209	0	80.919	45.5	50.3	45.5	9283100000	680350000	701380000	854350000	12	11	13	118
O95864;O95864-4;O95864-2;O95864-3	O95864;O95864-4;O95864-2;O95864-3	7;5;5;4	7;5;5;4	7;5;5;4	67789000	71539000	91949000	Fatty acid desaturase 2	FADS2	;;;	4	7	7	7	5	4	6	5	4	6	5	4	6	20.3	20.3	20.3	52.259	444	444;413;422;386	1	55	0	13.813	12.6	9.5	15.3	977210000	94446000	73265000	126400000	1	2	3	19
O95865;Q5SSV3;Q5SRR8;H0Y7N1	O95865;Q5SSV3;Q5SRR8;H0Y7N1	9;6;6;5	8;5;5;4	8;5;5;4	167260000	152600000	165170000	N(G),N(G)-dimethylarginine dimethylaminohydrolase 2	DDAH2	;;;	4	9	8	8	8	7	5	7	6	4	7	6	4	42.8	40	40	29.644	285	285;226;236;188	1	70	0	12.972	40	30.9	20.7	1618900000	152490000	101000000	86462000	2	1	1	17
O95881;V9GY50;V9GYV4	O95881	7;1;1	7;1;1	7;1;1	449270000	521770000	457540000	Thioredoxin domain-containing protein 12	TXNDC12		3	7	7	7	3	4	6	3	4	6	3	4	6	62.8	62.8	62.8	19.206	172	172;55;56	1	98	0	28.24	25.6	30.8	57.6	5705300000	351950000	467250000	524090000	3	7	5	60
O96005;F5H8J3;B4DDS3;K7EQQ1;K7EJ16;K7ERL5	O96005;F5H8J3;B4DDS3	17;15;14;5;3;2	17;15;14;5;3;2	17;15;14;5;3;2	396650000	594910000	566930000	Cleft lip and palate transmembrane protein 1	CLPTM1	;;	6	17	17	17	14	11	13	14	11	13	14	11	13	36	36	36	76.096	669	669;655;567;171;152;209	1	150	0	60.748	31.8	20.6	23.2	6140200000	531890000	398510000	560620000	9	5	9	89
O96007	O96007	3	3	3	40637000	38480000	49749000	Molybdopterin synthase catalytic subunit	MOCS2		1	3	3	3	3	3	2	3	3	2	3	3	2	28.2	28.2	28.2	20.944	188	188	1	36	0	11.384	28.2	28.2	18.6	579680000	50021000	37644000	51564000	1	4	1	24
O96008;O96008-2;K7EJ57;K7EKG4	O96008;O96008-2;K7EJ57	9;8;5;4	9;8;5;4	9;8;5;4	686670000	705020000	708290000	Mitochondrial import receptor subunit TOM40 homolog	TOMM40	;;	4	9	9	9	8	9	9	8	9	9	8	9	9	51.8	51.8	51.8	37.893	361	361;329;214;168	1	146	0	60.285	47.6	51.8	51.8	8293100000	643970000	769170000	742130000	9	9	6	90
O96011-2;O96011;H7C3V6	O96011-2;O96011;H7C3V6	4;4;3	4;4;3	4;4;3	42020000	34790000	38073000	Peroxisomal membrane protein 11B	PEX11B	;;	3	4	4	4	4	3	4	4	3	4	4	3	4	16.3	16.3	16.3	26.724	245	245;259;81	1	43	0.00026954	3.6475	16.3	13.1	16.3	468190000	48708000	29707000	40362000	2	1	1	14
O96019;O96019-2;H7C5S0;C9JQT2;O94805	O96019;O96019-2;H7C5S0	11;9;7;3;1	11;9;7;3;1	11;9;7;3;1	443960000	354250000	371980000	Actin-like protein 6A	ACTL6A	;;	5	11	11	11	10	8	10	10	8	10	10	8	10	39.6	39.6	39.6	47.46	429	429;387;161;50;426	1	142	0	96.433	35.2	29.4	37.3	5105900000	482470000	334060000	481750000	7	4	7	76
P00167-2;P00167;P00167-3;J3KNC7	P00167-2;P00167;P00167-3	5;5;4;1	5;5;4;1	5;5;4;1	320670000	352310000	311460000	Cytochrome b5	CYB5A	;;	4	5	5	5	5	5	5	5	5	5	5	5	5	67.3	67.3	67.3	11.268	98	98;134;124;60	1	99	0	17.954	67.3	67.3	67.3	3900100000	339480000	341680000	348580000	8	7	6	64
P00338;P00338-3;P00338-4;P00338-5;P00338-2;F5GXY2;F5GYU2;F5GXH2;F5H5J4;F5H6W8;F5GZQ4;F5H8H6;F5GXC7;F5GWW2;F5GXU1;F5H5G7;F5H155;G3XAP5;F5H245;Q6ZMR3;P07864	P00338;P00338-3;P00338-4;P00338-5;P00338-2	23;23;19;15;15;10;9;8;6;6;4;3;3;3;2;1;1;1;1;1;1	23;23;19;15;15;10;9;8;6;6;4;3;3;3;2;1;1;1;1;1;1	22;22;18;14;14;10;9;8;6;6;4;3;3;3;2;0;0;0;0;0;0	37107000000	37309000000	36083000000	L-lactate dehydrogenase A chain	LDHA	;;;;	21	23	23	22	23	22	20	23	22	20	22	21	19	77.4	77.4	73.8	36.688	332	332;361;274;241;274;156;144;114;89;94;72;42;45;45;46;183;225;241;318;332;332	1	664	0	323.31	77.4	71.4	65.1	468720000000	49850000000	33707000000	34922000000	49	44	43	525
P00367;B4DGN5;B3KV55;P49448	P00367;B4DGN5;B3KV55;P49448	27;22;20;20	27;22;20;20	27;22;20;20	2390100000	2227000000	2244400000	Glutamate dehydrogenase 1, mitochondrial;Glutamate dehydrogenase 2, mitochondrial	GLUD1;GLUD2	;;;	4	27	27	27	24	27	27	24	27	27	24	27	27	56.3	56.3	56.3	61.397	558	558;425;391;558	1	414	0	224.31	54.3	56.3	56.3	27867000000	2359700000	2367200000	2378800000	21	18	21	244
P00374;B4DDD2;B4DM58;C9JJ68;Q86XF0	P00374;B4DDD2;B4DM58	6;5;4;1;1	6;5;4;1;1	6;5;4;1;1	90627000	151550000	193580000	Dihydrofolate reductase	DHFR	;;	5	6	6	6	5	4	4	5	4	4	5	4	4	44.4	44.4	44.4	21.452	187	187;135;129;114;187	1	42	0	10.598	39	27.3	27.3	1314200000	89601000	188370000	238720000	2	4	2	20
P00387-2;P00387;P00387-3;B1AHF3	P00387-2;P00387;P00387-3;B1AHF3	16;16;16;9	16;16;16;9	16;16;16;9	2565400000	2382300000	2462700000	NADH-cytochrome b5 reductase 3;NADH-cytochrome b5 reductase 3 membrane-bound form;NADH-cytochrome b5 reductase 3 soluble form	CYB5R3	;;;	4	16	16	16	15	13	13	15	13	13	15	13	13	77.1	77.1	77.1	31.76	279	279;301;335;147	1	298	0	168.88	77.1	56.6	63.4	30682000000	2641300000	2091300000	2319400000	17	16	18	233
P00390-2;P00390;P00390-3;P00390-4;P00390-5;H0YBD4;E5RI06;H0YC68	P00390-2;P00390;P00390-3;P00390-4;P00390-5	19;19;18;15;14;9;4;3	19;19;18;15;14;9;4;3	19;19;18;15;14;9;4;3	1153200000	1333800000	1425300000	Glutathione reductase, mitochondrial	GSR	;;;;	8	19	19	19	17	14	15	17	14	15	17	14	15	63.7	63.7	63.7	51.7	479	479;522;493;469;440;300;144;131	1	283	0	191.54	61	53.7	50.5	15602000000	1356700000	1029800000	1170900000	8	11	15	156
P00395	P00395	2	2	2	46096000	51394000	46187000	Cytochrome c oxidase subunit 1	MT-CO1		1	2	2	2	2	2	2	2	2	2	2	2	2	7.6	7.6	7.6	57.041	513	513	1	25	0.0017452	2.6264	7.6	7.6	7.6	570050000	33606000	50579000	29496000	1	2	0	9
P00403	P00403	4	4	4	259470000	295200000	282230000	Cytochrome c oxidase subunit 2	MT-CO2		1	4	4	4	4	4	4	4	4	4	4	4	4	24.7	24.7	24.7	25.565	227	227	1	49	0	21.619	24.7	24.7	24.7	3523100000	262120000	270430000	283490000	1	3	2	33
P00441;H7BYH4	P00441;H7BYH4	7;6	7;6	7;6	2766200000	2791300000	2977100000	Superoxide dismutase [Cu-Zn]	SOD1	;	2	7	7	7	7	7	7	7	7	7	7	7	7	64.9	64.9	64.9	15.936	154	154;135	1	180	0	156.58	64.9	64.9	64.9	36081000000	3072200000	2510400000	3076000000	13	15	14	168
P00491;G3V5M2;G3V2H3;G3V393	P00491;G3V5M2	19;12;7;3	19;12;7;3	19;12;7;3	3824000000	4291000000	3901400000	Purine nucleoside phosphorylase	PNP	;	4	19	19	19	17	18	17	17	18	17	17	18	17	84.4	84.4	84.4	32.118	289	289;221;93;61	1	357	0	289.54	74.7	78.5	74.7	48275000000	3577200000	3992700000	4115300000	26	25	22	300
P00492;Q9NRG1-2;Q9NRG1	P00492	13;1;1	13;1;1	13;1;1	1416100000	1386300000	1543300000	Hypoxanthine-guanine phosphoribosyltransferase	HPRT1		3	13	13	13	13	13	12	13	13	12	13	13	12	79.4	79.4	79.4	24.579	218	218;190;225	1	190	0	80.95	79.4	79.4	72.9	17723000000	1386000000	1348900000	1509300000	13	12	10	122
P00505;P00505-2	P00505;P00505-2	24;20	24;20	24;20	3736200000	3292200000	3560600000	Aspartate aminotransferase, mitochondrial	GOT2	;	2	24	24	24	23	23	21	23	23	21	23	23	21	64.4	64.4	64.4	47.517	430	430;387	1	353	0	195.93	64.4	59.1	55.3	43253000000	4451900000	3110300000	3518600000	17	15	14	188
P00533;E9PFD7;Q504U8;P00533-4;P00533-3;P00533-2;C9JYS6;J3KTI5;B4DTR1;J3QLU9;P04626-3;P04626-2;P04626-5;P04626-4;P04626	P00533;E9PFD7;Q504U8;P00533-4;P00533-3	31;30;25;18;18;13;5;1;1;1;1;1;1;1;1	31;30;25;18;18;13;5;1;1;1;1;1;1;1;1	29;28;23;18;18;13;5;0;0;0;0;0;0;0;0	1129800000	1130700000	1199600000	Epidermal growth factor receptor;Receptor protein-tyrosine kinase	EGFR	;;;;	15	31	31	29	27	26	25	27	26	25	26	24	23	36.1	36.1	34.2	134.28	1210	1210;1157;1091;628;705;405;128;251;979;1055;569;645;1225;1240;1255	1	385	0	148.17	32.4	29.2	28.7	14163000000	1281400000	1091900000	1129100000	20	13	16	199
P00558;B7Z7A9;E7ERH5	P00558;B7Z7A9;E7ERH5	34;32;21	34;32;21	29;28;18	31488000000	28963000000	29728000000	Phosphoglycerate kinase 1	PGK1	;;	3	34	34	29	33	33	33	33	33	33	28	28	28	80.1	80.1	70.3	44.614	417	417;389;281	1	811	0	323.31	79.9	78.4	78.4	360080000000	31640000000	26160000000	29641000000	56	49	50	639
P00918;E5RID5;E5RK37	P00918;E5RID5;E5RK37	4;2;2	4;2;2	4;2;2	44409000	41590000	40318000	Carbonic anhydrase 2	CA2	;;	3	4	4	4	1	3	3	1	3	3	1	3	3	21.5	21.5	21.5	29.246	260	260;97;101	1	30	0	7.7114	6.2	14.2	14.2	463820000	19872000	58507000	58386000	1	1	0	13
P00966;Q5T6L5;Q5T6L6	P00966;Q5T6L5;Q5T6L6	4;2;2	4;2;2	4;2;2	45298000	45612000	49314000	Argininosuccinate synthase	ASS1	;;	3	4	4	4	2	3	3	2	3	3	2	3	3	13.1	13.1	13.1	46.53	412	412;179;198	1	31	0	4.6361	5.3	10.9	10.9	509520000	35908000	48436000	61289000	0	3	1	20
P01024;M0QXZ3;M0QYC8	P01024	15;2;1	15;2;1	12;1;1	166530000	171450000	162710000	Complement C3;Complement C3 beta chain;C3-beta-c;Complement C3 alpha chain;C3a anaphylatoxin;Acylation stimulating protein;Complement C3b alpha chain;Complement C3c alpha chain fragment 1;Complement C3dg fragment;Complement C3g fragment;Complement C3d fragment;Complement C3f fragment;Complement C3c alpha chain fragment 2	C3		3	15	15	12	12	8	8	12	8	8	10	7	7	10.9	10.9	9.1	187.15	1663	1663;100;192	1	113	0	26.297	8.5	6.4	6.2	2040800000	189760000	132420000	97343000	3	4	3	39
P01111;G3V4K2;G3V5T7	P01111	6;1;1	6;1;1	1;0;0	426620000	417530000	379320000	GTPase NRas	NRAS		3	6	6	1	6	5	6	6	5	6	1	1	1	44.4	44.4	4.8	21.229	189	189;43;75	1	82	0	31.914	44.4	36.5	44.4	5034500000	428770000	353040000	387480000	4	4	3	52
P01137;M0R2S0	P01137;M0R2S0	4;2	4;2	4;2	0	0	15807000	Transforming growth factor beta-1;Latency-associated peptide	TGFB1	;	2	4	4	4	3	2	2	3	2	2	3	2	2	13.8	13.8	13.8	44.341	390	390;120	1	30	0	6.6772	10.5	5.4	5.4	269660000	26522000	12326000	16656000	1	0	1	5
P01891;P30459;P16189;P16190;P30512;P10314	P01891;P30459;P16189;P16190;P30512;P10314	21;12;12;11;11;11	21;12;12;11;11;11	3;0;0;0;0;0	9779700000	9131700000	10870000000	HLA class I histocompatibility antigen, A-68 alpha chain;HLA class I histocompatibility antigen, A-74 alpha chain;HLA class I histocompatibility antigen, A-31 alpha chain;HLA class I histocompatibility antigen, A-33 alpha chain;HLA class I histocompatibility antigen, A-29 alpha chain;HLA class I histocompatibility antigen, A-32 alpha chain	HLA-A	;;;;;	6	21	21	3	20	18	18	20	18	18	2	2	2	54.8	54.8	7.1	40.908	365	365;365;365;365;365;365	1	537	0	323.31	54.2	50.1	52.9	129710000000	10272000000	9469800000	11375000000	38	34	38	439
P02462-2;P02462;P29400;P29400-2	P02462-2;P02462;P29400;P29400-2	2;2;1;1	2;2;1;1	2;2;1;1	29656000	0	82861000	Collagen alpha-1(IV) chain;Arresten;Collagen alpha-5(IV) chain	COL4A1;COL4A5	;;;	4	2	2	2	1	1	2	1	1	2	1	1	2	2.2	2.2	2.2	127.98	1318	1318;1669;1685;1691	1	30	0	7.8963	1.1	1.1	2.2	801540000	37006000	10642000	81126000	1	0	2	15
P02545-2;Q5TCI8	P02545-2;Q5TCI8	51;40	1;1	1;1	153190000	271170000	234560000	Prelamin-A/C;Lamin-A/C	LMNA	;	2	51	1	1	50	48	48	1	1	1	1	1	1	77.4	4.5	4.5	65.134	572	572;491	1	48	0	18.906	77.4	74	74	2823500000	158080000	250360000	224200000	2	3	1	37
P02786;G3V0E5;F5H6B1;H7C3V5;F8WBE5	P02786;G3V0E5;F5H6B1	29;26;18;5;3	29;26;18;5;3	29;26;18;5;3	2651300000	2638100000	2581900000	Transferrin receptor protein 1;Transferrin receptor protein 1, serum form	TFRC	;;	5	29	29	29	28	26	26	28	26	26	28	26	26	46.2	46.2	46.2	84.87	760	760;679;478;118;81	1	480	0	248.58	43.9	40.8	41.1	31598000000	2584200000	2401800000	2400700000	32	27	22	299
P02792	P02792	12	12	12	1925500000	1635000000	1744700000	Ferritin light chain	FTL		1	12	12	12	10	10	11	10	10	11	10	10	11	62.9	62.9	62.9	20.019	175	175	1	245	0	47.469	52	46.9	55.4	21773000000	1764800000	1726100000	1905600000	12	8	12	122
P02794;G3V192;G3V1D1;E9PRK8;E9PKY7;E9PPQ4;E9PQR3;E9PKM5;E9PK45	P02794;G3V192;G3V1D1	11;9;8;4;4;3;2;2;2	11;9;8;4;4;3;2;2;2	11;9;8;4;4;3;2;2;2	10117000000	9477500000	10241000000	Ferritin heavy chain;Ferritin heavy chain, N-terminally processed;Ferritin	FTH1	;;	9	11	11	11	11	11	11	11	11	11	11	11	11	71.6	71.6	71.6	21.225	183	183;153;113;95;114;58;50;81;102	1	303	0	138.91	71.6	71.6	71.6	118980000000	10637000000	8558200000	9688900000	26	21	21	258
P04040	P04040	17	17	17	515220000	640130000	681520000	Catalase	CAT		1	17	17	17	13	14	13	13	14	13	13	14	13	39.5	39.5	39.5	59.755	527	527	1	165	0	57.711	33	31.9	30.6	6908900000	618520000	476510000	599470000	5	9	7	65
P04062-4;P04062-2;P04062;F5H241;P04062-5;P04062-3	P04062-4;P04062-2;P04062;F5H241;P04062-5;P04062-3	18;18;18;17;17;11	18;18;18;17;17;11	18;18;18;17;17;11	1555200000	1584200000	1698400000	Glucosylceramidase	GBA	;;;;;	6	18	18	18	18	15	17	18	15	17	18	15	17	54.8	54.8	54.8	50.316	449	449;516;536;423;487;263	1	278	0	161.73	54.8	48.3	51.9	20232000000	1716600000	1375400000	1601700000	16	16	14	187
P04075;P04075-2;J3KPS3;H3BQN4;H3BPS8;H3BUH7;H3BR04;H3BMQ8;H3BU78;H3BR68;Q5T7D5;P05062	P04075;P04075-2;J3KPS3;H3BQN4;H3BPS8	37;36;35;34;22;17;17;16;14;11;1;1	37;36;35;34;22;17;17;16;14;11;1;1	29;28;29;26;15;15;15;14;12;10;0;0	48206000000	46128000000	45573000000	Fructose-bisphosphate aldolase A;Fructose-bisphosphate aldolase	ALDOA	;;;;	12	37	37	29	37	34	33	37	34	33	29	27	25	90.9	90.9	77.2	39.42	364	364;418;368;361;278;155;162;140;204;130;223;364	1	964	0	323.31	90.9	90.9	89.8	557710000000	51315000000	42823000000	45728000000	75	69	68	871
P04080	P04080	6	6	6	786650000	652120000	607660000	Cystatin-B	CSTB		1	6	6	6	3	4	4	3	4	4	3	4	4	79.6	79.6	79.6	11.139	98	98	1	121	0	39.332	45.9	70.4	70.4	10292000000	699250000	624940000	600390000	4	6	6	73
P04083;Q5T3N1;Q5T3N0	P04083	26;11;8	26;11;8	26;11;8	18998000000	19115000000	19016000000	Annexin A1	ANXA1		3	26	26	26	26	23	24	26	23	24	26	23	24	72.5	72.5	72.5	38.714	346	346;204;115	1	623	0	323.31	72.5	71.1	72.5	236500000000	18449000000	17564000000	17700000000	47	42	40	522
P04114	P04114	4	3	3	0	50337000	34576000	Apolipoprotein B-100;Apolipoprotein B-48	APOB		1	4	3	3	1	2	3	1	2	3	1	2	3	1	0.7	0.7	515.6	4563	4563	1	21	0	5.2479	0.2	0.4	0.7	404060000	27475000	46122000	47037000	0	2	1	14
P04150-9;P04150-2;P04150-6;P04150-8;P04150-10;P04150;P04150-3;P04150-7;P04150-5;B7Z7I2;D6RDA9;Q3MSN4	P04150-9;P04150-2;P04150-6;P04150-8;P04150-10;P04150;P04150-3;P04150-7;P04150-5	5;5;5;5;5;5;5;3;3;2;1;1	5;5;5;5;5;5;5;3;3;2;1;1	5;5;5;5;5;5;5;3;3;2;1;1	63857000	78311000	66144000	Glucocorticoid receptor	NR3C1	;;;;;;;;	12	5	5	5	3	5	5	3	5	5	3	5	5	9.5	9.5	9.5	78.695	716	716;742;743;751;751;777;778;558;593;380;144;145	1	55	0	7.8678	6.1	9.5	9.5	854880000	73347000	80879000	76678000	0	0	1	10
P04179;P04179-4;F5H4R2;F5GYZ5;P04179-2;F5H3C5;P04179-3;G8JLJ2;G5E9P6;F5GXZ9	P04179;P04179-4;F5H4R2;F5GYZ5;P04179-2;F5H3C5;P04179-3;G8JLJ2	12;11;10;10;10;9;7;6;3;3	12;11;10;10;10;9;7;6;3;3	12;11;10;10;10;9;7;6;3;3	10463000000	12093000000	10933000000	Superoxide dismutase [Mn], mitochondrial	SOD2	;;;;;;;	10	12	12	12	12	12	12	12	12	12	12	12	12	66.2	66.2	66.2	24.722	222	222;176;183;190;183;111;162;61;140;141	1	315	0	323.31	66.2	66.2	66.2	136570000000	10801000000	11129000000	11323000000	23	24	23	281
P04181;P04181-2	P04181;P04181-2	5;4	5;4	5;4	39522000	39150000	47982000	Ornithine aminotransferase, mitochondrial;Ornithine aminotransferase, hepatic form;Ornithine aminotransferase, renal form	OAT	;	2	5	5	5	4	5	3	4	5	3	4	5	3	16.4	16.4	16.4	48.534	439	439;301	1	45	0	9.4224	13.9	16.4	8.9	554100000	42644000	44766000	42803000	1	4	0	17
P04183;K7ERV3;K7ES52;K7ERJ1;K7ENW5	P04183;K7ERV3;K7ES52;K7ERJ1	9;8;6;6;3	9;8;6;6;3	9;8;6;6;3	132800000	122040000	136090000	Thymidine kinase, cytosolic;Thymidine kinase	TK1	;;;	5	9	9	9	7	5	7	7	5	7	7	5	7	50	50	50	25.468	234	234;267;180;187;87	1	86	0	19.894	38	24.4	38.5	1490700000	160110000	101690000	170250000	3	1	2	27
P04259	P04259	21	7	0	0	80161000	106660000	Keratin, type II cytoskeletal 6B	KRT6B		1	21	7	0	9	16	16	1	5	5	0	0	0	36.3	16.8	0	60.066	564	564	1	40	0	13.716	14.9	32.1	30	685800000	16345000	72472000	100250000	0	3	4	18
P04406;P04406-2;E7EUT5	P04406;P04406-2;E7EUT5	21;18;17	21;18;17	20;17;16	103800000000	97162000000	91861000000	Glyceraldehyde-3-phosphate dehydrogenase	GAPDH	;;	3	21	21	20	21	21	21	21	21	21	20	20	20	82.1	82.1	80	36.053	335	335;293;260	1	1728	0	323.31	82.1	82.1	82.1	1313300000000	105900000000	102280000000	90208000000	137	118	130	1580
P04632;K7ELJ7;U3KQE2;K7EM73;K7EIV0;U3KPR7;K7ES78;K7EMQ1;Q96L46	P04632;K7ELJ7;U3KQE2;K7EM73;K7EIV0	11;10;7;7;7;4;2;2;2	11;10;7;7;7;4;2;2;2	3;3;2;3;3;0;0;0;0	2364800000	2055400000	2205000000	Calpain small subunit 1	CAPNS1	;;;;	9	11	11	3	11	10	10	11	10	10	3	2	2	77.6	77.6	23.1	28.315	268	268;278;161;163;196;100;72;94;248	1	232	0	323.31	77.6	69	69	29172000000	2692400000	1407600000	1728900000	10	10	13	153
P04792;F8WE04;C9J3N8	P04792;F8WE04	16;9;2	16;9;2	16;9;2	9018600000	9244200000	9696100000	Heat shock protein beta-1	HSPB1	;	3	16	16	16	15	15	16	15	15	16	15	15	16	84.9	84.9	84.9	22.782	205	205;186;37	1	361	0	323.31	81.5	81.5	84.9	117100000000	9353600000	8861000000	9832800000	30	28	25	348
P04818;P04818-2;P04818-3	P04818;P04818-2	5;3;2	5;3;2	5;3;2	32463000	61711000	62746000	Thymidylate synthase	TYMS	;	3	5	5	5	3	2	3	3	2	3	3	2	3	20.1	20.1	20.1	35.716	313	313;279;230	1	33	0	9.0524	13.7	10.2	13.7	684390000	27291000	44557000	59552000	3	0	1	9
P04843;B7Z4L4;F8WF32	P04843;B7Z4L4	36;28;5	36;28;5	36;28;5	9716100000	9651700000	9617600000	Dolichyl-diphosphooligosaccharide--protein glycosyltransferase subunit 1	RPN1	;	3	36	36	36	34	36	36	34	36	36	34	36	36	67.9	67.9	67.9	68.569	607	607;435;121	1	652	0	323.31	65.6	67.9	67.9	116750000000	9811200000	8929900000	9759000000	43	42	43	507
P04844;P04844-2;Q5JYR7;Q5JYR4;F2Z3K5;Q5JYR3;H0Y5M1	P04844;P04844-2	21;20;8;7;5;4;3	21;20;8;7;5;4;3	21;20;8;7;5;4;3	4100100000	4319700000	4243800000	Dolichyl-diphosphooligosaccharide--protein glycosyltransferase subunit 2	RPN2	;	7	21	21	21	20	19	20	20	19	20	20	19	20	51	51	51	69.283	631	631;615;344;166;162;138;147	1	425	0	323.31	45.8	43.6	48.8	52991000000	4162900000	3755900000	3748100000	36	31	33	377
P04899;P04899-4;P04899-6;P04899-3;P04899-5;P04899-2;F5GZL8	P04899;P04899-4;P04899-6;P04899-3;P04899-5;P04899-2;F5GZL8	16;15;14;14;14;14;12	16;15;14;14;14;14;12	8;8;8;8;8;8;6	1570200000	1652500000	1892700000	Guanine nucleotide-binding protein G(i) subunit alpha-2	GNAI2	;;;;;;	7	16	16	8	14	15	14	14	15	14	7	8	7	61.1	61.1	36.1	40.45	355	355;366;303;318;339;339;274	1	269	0	155.99	54.9	58	54.9	20972000000	1672400000	1334900000	1760300000	17	15	13	177
P05023-4;P05023;P05023-3;P05023-2;B1AKY9;P50993;H0Y7C1;Q13733;Q5TC01;P20648;Q5TC02;E9PRA5;Q5TC05;M0QXF2	P05023-4;P05023;P05023-3;P05023-2	44;44;39;30;15;15;13;9;5;5;4;4;2;1	44;44;39;30;15;15;13;9;5;5;4;4;2;1	28;28;23;24;2;2;2;1;4;0;4;1;1;0	4531600000	4434000000	4380400000	Sodium/potassium-transporting ATPase subunit alpha-1	ATP1A1	;;;	14	44	44	28	38	39	36	38	39	36	24	24	24	48.2	48.2	29.8	113	1023	1023;1023;992;681;1009;1020;714;1029;144;1035;106;517;157;178	1	641	0	323.31	41.7	44.1	38.8	52491000000	4615000000	4278000000	3996600000	36	36	33	402
P05091-2;P05091;S4R3S4;F8VP50	P05091-2;P05091	11;11;4;3	10;10;4;3	10;10;4;3	262060000	237530000	262520000	Aldehyde dehydrogenase, mitochondrial	ALDH2	;	4	11	10	10	9	10	9	8	9	8	8	9	8	29.6	27.9	27.9	50.989	470	470;517;117;261	1	91	0	28.558	25.1	26.8	25.5	3308000000	241910000	239340000	226930000	5	5	6	54
P05109	P05109	3	3	3	0	159960000	0	Protein S100-A8;Protein S100-A8, N-terminally processed	S100A8		1	3	3	3	0	3	1	0	3	1	0	3	1	31.2	31.2	31.2	10.834	93	93	1	7	0	5.2042	0	31.2	7.5	174890000	0	146730000	8821600	0	2	0	2
P05120;E7ERB5;E7EPJ9;E9PDK7;H7C004;H7BYS2	P05120	9;4;4;3;1;1	9;4;4;3;1;1	9;4;4;3;1;1	194200000	163590000	140350000	Plasminogen activator inhibitor 2	SERPINB2		6	9	9	9	5	4	5	5	4	5	5	4	5	29.6	29.6	29.6	46.596	415	415;132;161;113;253;280	1	75	0	33.014	16.9	10.6	12.8	2032800000	314970000	196060000	162800000	1	1	0	25
P05141;Q9H0C2	P05141	15;3	6;0	6;0	1997600000	2002300000	2110200000	ADP/ATP translocase 2;ADP/ATP translocase 2, N-terminally processed	SLC25A5		2	15	6	6	15	15	15	6	6	6	6	6	6	45.3	19.5	19.5	32.852	298	298;315	1	158	0	50.873	45.3	45.3	45.3	25122000000	2131900000	1967400000	1833600000	9	8	7	95
P05161	P05161	13	13	13	34618000000	34087000000	31818000000	Ubiquitin-like protein ISG15	ISG15		1	13	13	13	11	13	10	11	13	10	11	13	10	85.5	85.5	85.5	17.887	165	165	1	719	0	323.31	85.5	85.5	72.7	408310000000	35828000000	32513000000	31939000000	46	55	47	654
P05187;P10696;P09923	P05187;P10696	9;5;1	9;5;1	9;5;1	87638000	90471000	126910000	Alkaline phosphatase, placental type;Alkaline phosphatase, placental-like	ALPP;ALPPL2	;	3	9	9	9	5	5	5	5	5	5	5	5	5	26.9	26.9	26.9	57.953	535	535;532;528	1	70	0	22.73	13.6	16.4	15.1	1211700000	62270000	57645000	80723000	2	1	3	21
P05198;G3V4T5;H0YJS4	P05198;G3V4T5;H0YJS4	23;19;18	23;19;18	23;19;18	2482900000	2768200000	2611800000	Eukaryotic translation initiation factor 2 subunit 1	EIF2S1	;;	3	23	23	23	21	23	22	21	23	22	21	23	22	69.8	69.8	69.8	36.112	315	315;273;252	1	397	0	323.31	65.7	69.8	69.8	32796000000	2605300000	2719800000	3045100000	25	21	19	246
P05204	P05204	2	2	1	791640000	28137000	42143000	Non-histone chromosomal protein HMG-17	HMGN2		1	2	2	1	1	1	1	1	1	1	0	0	0	23.3	23.3	13.3	9.3926	90	90	1	29	0	8.2253	10	10	10	8614700000	856550000	364120000	428640000	2	2	2	22
P05362;E7ESS4;K7EKL8	P05362	13;6;5	13;6;5	13;6;5	389240000	311490000	320940000	Intercellular adhesion molecule 1	ICAM1		3	13	13	13	10	11	11	10	11	11	10	11	11	33.5	33.5	33.5	57.825	532	532;310;180	1	138	0	56.017	26.7	29.1	30.1	4122900000	335270000	337740000	331190000	6	4	4	68
P05386	P05386	3	2	2	1230100000	1474100000	1447800000	60S acidic ribosomal protein P1	RPLP1		1	3	2	2	3	3	3	2	2	2	2	2	2	66.7	51.8	51.8	11.514	114	114	1	52	0	75.101	66.7	66.7	66.7	18247000000	1421000000	1541800000	1295800000	5	5	5	65
P05387;H0YDD8;P05386-2	P05387	9;3;1	9;3;1	8;2;0	4857000000	5763200000	4732000000	60S acidic ribosomal protein P2	RPLP2		3	9	9	8	8	9	9	8	9	9	7	8	8	92.2	92.2	77.4	11.665	115	115;92;89	1	197	0	181.83	85.2	92.2	92.2	62323000000	5184100000	5443100000	4557500000	19	15	15	204
P05388;F8VWS0;Q3B7A4;F8VU65;F8VW21;F8VPE8;G3V210;F8VZS0;F8VQY6;F8VRK7;Q8NHW5;F8VS58;F8VWV4;F8W1K8	P05388;F8VWS0;Q3B7A4;F8VU65;F8VW21;F8VPE8;G3V210;F8VZS0;F8VQY6;F8VRK7;Q8NHW5;F8VS58	13;12;12;11;10;9;9;9;8;8;8;7;6;3	13;12;12;11;10;9;9;9;8;8;8;7;6;3	13;12;12;11;10;9;9;9;8;8;8;7;6;3	6829600000	6678900000	6650400000	60S acidic ribosomal protein P0;60S acidic ribosomal protein P0-like	RPLP0;RPLP0P6	;;;;;;;;;;;	14	13	13	13	12	13	13	12	13	13	12	13	13	58	58	58	34.273	317	317;281;255;247;244;153;166;246;142;156;317;121;111;107	1	238	0	201.84	49.8	58	58	79780000000	7078700000	5476900000	6811200000	21	19	22	242
P05455;E7ERC4;E9PFL9;E9PGX9	P05455;E7ERC4	27;17;12;10	27;17;12;10	27;17;12;10	1893800000	2016300000	2046900000	Lupus La protein	SSB	;	4	27	27	27	23	24	20	23	24	20	23	24	20	59.3	59.3	59.3	46.836	408	408;184;134;120	1	400	0	141.69	53.7	54.4	48	23490000000	1929000000	1933300000	2040700000	19	20	18	228
P05556;P05556-2;P05556-5;P05556-4;P05556-3;E7EQW5;C9JPK5;Q5T3E6;E9PLR6;E7EUI6;E7ERX5;C9JJP8;Q5T3E5;E9PQJ2;H7C4N8;C9JNE0	P05556;P05556-2;P05556-5;P05556-4;P05556-3	24;22;22;22;22;7;6;6;6;6;5;4;4;4;3;1	24;22;22;22;22;7;6;6;6;6;5;4;4;4;3;1	24;22;22;22;22;7;6;6;6;6;5;4;4;4;3;1	5099400000	4569000000	4855000000	Integrin beta-1	ITGB1	;;;;	16	24	24	24	22	22	22	22	22	22	22	22	22	35.2	35.2	35.2	88.414	798	798;789;801;819;825;163;98;136;143;152;124;31;89;104;108;14	1	439	0	233.82	33.1	33.1	32.7	56385000000	4705100000	4206700000	4879100000	31	23	27	321
P06132;H0Y5R6;Q5T446	P06132;H0Y5R6	10;6;4	10;6;4	10;6;4	327190000	292990000	297870000	Uroporphyrinogen decarboxylase	UROD	;	3	10	10	10	8	8	9	8	8	9	8	8	9	41.7	41.7	41.7	40.786	367	367;228;193	1	124	0	53.306	33.5	36	37.9	3948100000	293500000	268140000	340260000	4	9	5	65
P06280;V9GYN5	P06280	8;3	8;3	8;3	92394000	86087000	86928000	Alpha-galactosidase A	GLA		2	8	8	8	4	3	4	4	3	4	4	3	4	22.1	22.1	22.1	48.766	429	429;222	1	56	0	14.144	11	7	11.2	1054300000	94172000	47789000	49370000	1	1	3	22
P06493;P06493-2;E5RIU6;K7ELV5;G3V317;J3QSD7;Q96Q40-2;Q96Q40-4;Q96Q40-3;Q96Q40-5;Q96Q40;Q07002;Q07002-2;Q07002-3;Q9NYV4-3;Q14004-2;Q14004	P06493;P06493-2;E5RIU6	13;10;9;2;1;1;1;1;1;1;1;1;1;1;1;1;1	13;10;9;2;1;1;1;1;1;1;1;1;1;1;1;1;1	11;9;7;0;0;0;0;0;0;0;0;0;0;0;0;0;0	728710000	786400000	745320000	Cyclin-dependent kinase 1	CDK1	;;	17	13	13	11	12	10	9	12	10	9	10	8	7	54.5	54.5	48.1	34.095	297	297;240;189;164;39;1201;358;384;400;429;435;472;474;504;1273;1452;1512	1	150	0	41.493	47.8	38.4	35.4	9033100000	969610000	674590000	682880000	8	8	9	88
P06576;H0YH81;F8W0P7	P06576;H0YH81	26;21;9	26;21;9	2;2;2	14976000000	15143000000	15457000000	ATP synthase subunit beta, mitochondrial;ATP synthase subunit beta	ATP5B	;	3	26	26	2	24	23	23	24	23	23	2	1	1	72.4	72.4	5.7	56.559	529	529;362;270	1	724	0	323.31	66.5	63.5	63.5	197410000000	15821000000	13988000000	15014000000	58	53	52	625
P06702	P06702	3	3	3	0	97401000	0	Protein S100-A9	S100A9		1	3	3	3	0	3	1	0	3	1	0	3	1	33.3	33.3	33.3	13.242	114	114	1	10	0	46.629	0	33.3	13.2	149020000	0	91793000	3999600	0	4	0	5
P06733;K7EM90	P06733	27;11	27;11	7;7	58718000000	59458000000	58991000000	Alpha-enolase	ENO1		2	27	27	7	24	26	24	24	26	24	7	7	7	68	68	12	47.168	434	434;195	1	1497	0	323.31	62	62.9	66.4	731800000000	60987000000	57262000000	59706000000	111	102	109	1374
P06737-2;P06737;E9PK47	P06737-2;P06737;E9PK47	37;37;35	37;37;35	30;30;28	1831700000	1768300000	1848200000	Glycogen phosphorylase, liver form;Alpha-1,4 glucan phosphorylase	PYGL	;;	3	37	37	30	33	33	34	33	33	34	26	26	27	50.7	50.7	42.8	93.133	813	813;847;819	1	514	0	195.73	45.3	45.5	46.4	22325000000	1827400000	1728400000	1913700000	32	20	25	278
P06744;P06744-2;K7EQ48;K7EPY4;K7EP41;K7ELR7;K7ENA0;K7ERC6;K7ERK8;K7ESF4;K7EIL4;Q8N196	P06744;P06744-2;K7EQ48	22;21;19;7;6;4;4;3;2;2;1;1	22;21;19;7;6;4;4;3;2;2;1;1	16;15;14;6;5;3;4;3;2;2;1;1	11385000000	11315000000	10852000000	Glucose-6-phosphate isomerase	GPI	;;	12	22	22	16	20	20	18	20	20	18	15	14	12	51.6	51.6	38.2	63.146	558	558;569;474;166;159;146;162;161;133;209;110;739	1	420	0	323.31	48.9	44.3	39.4	140350000000	12093000000	10262000000	9872400000	33	35	28	357
P06748;P06748-3;P06748-2;E5RI98;E5RGW4	P06748;P06748-3;P06748-2	12;11;11;3;1	12;11;11;3;1	12;11;11;3;1	8691600000	10798000000	10541000000	Nucleophosmin	NPM1	;;	5	12	12	12	12	12	12	12	12	12	12	12	12	50	50	50	32.575	294	294;259;265;111;59	1	291	0	206.84	50	50	50	123630000000	9629800000	10005000000	10827000000	17	21	19	235
P06753-2;Q5VU59;P06753-3;Q5VU61;D6R904;D6RFM2	P06753-2;Q5VU59;P06753-3;Q5VU61	26;24;22;21;10;3	26;24;22;21;10;3	0;0;0;0;0;0	11047000000	11798000000	12589000000		DKFZp686J1372;TPM3	;;;	6	26	26	0	24	23	25	24	23	25	0	0	0	73.4	73.4	0	29.032	248	248;232;247;223;95;49	1	541	0	152.36	67.7	66.9	70.6	141290000000	11969000000	11383000000	12900000000	26	22	25	292
P06756-3;P06756-2;P06756;H7BZG1	P06756-3;P06756-2;P06756	21;21;21;3	21;21;21;3	21;21;21;3	598040000	569100000	601210000	Integrin alpha-V;Integrin alpha-V heavy chain;Integrin alpha-V light chain	ITGAV	;;	4	21	21	21	17	17	17	17	17	17	17	17	17	28.6	28.6	28.6	111.13	1002	1002;1012;1048;136	1	260	0	76.502	21.4	21.5	23.8	7549100000	604160000	624830000	599050000	12	8	11	122
P07093-2;P07093;P07093-3;C9JN98	P07093-2;P07093;P07093-3;C9JN98	8;8;8;4	8;8;8;4	8;8;8;4	134680000	156950000	167830000	Glia-derived nexin	SERPINE2	;;;	4	8	8	8	8	7	8	8	7	8	8	7	8	23.9	23.9	23.9	44	397	397;398;409;275	1	81	0	14.102	23.9	20.9	23.9	1891800000	156680000	168930000	189770000	1	2	1	21
P07099;B1AQP9;B1AQP8	P07099	24;8;6	24;8;6	24;8;6	2648900000	2651900000	2837900000	Epoxide hydrolase 1	EPHX1		3	24	24	24	20	21	22	20	21	22	20	21	22	65.3	65.3	65.3	52.948	455	455;161;136	1	371	0	259.72	57.6	59.1	63.1	31861000000	2345100000	2586600000	2823500000	13	20	20	229
P07108;P07108-3;P07108-2;P07108-4;P07108-5;P07108-6	P07108;P07108-3;P07108-2;P07108-4;P07108-5	7;6;6;6;6;2	7;6;6;6;6;2	7;6;6;6;6;2	1850900000	2605200000	2119100000	Acyl-CoA-binding protein	DBI	;;;;	6	7	7	7	6	5	7	6	5	7	6	5	7	72.4	72.4	72.4	10.044	87	87;88;104;129;148;123	1	141	0	100.29	70.1	58.6	72.4	24566000000	2186500000	2253200000	2171700000	8	6	7	78
P07195;A8MW50;C9J7H8;F5H793	P07195;A8MW50	21;11;10;9	20;10;10;9	20;10;10;9	22718000000	23084000000	23073000000	L-lactate dehydrogenase B chain;L-lactate dehydrogenase	LDHB	;	4	21	20	20	19	18	17	18	17	16	18	17	16	60.8	57.2	57.2	36.638	334	334;232;136;102	1	501	0	323.31	54.8	48.8	48.8	282050000000	23036000000	22747000000	23273000000	35	26	33	403
P07203;P07203-2	P07203	7;1	7;1	7;1	170910000	157450000	131250000	Glutathione peroxidase 1	GPX1		2	7	7	7	5	4	5	5	4	5	5	4	5	54.2	54.2	54.2	22.088	203	203;98	1	67	0	34.33	35	29.6	35	1865200000	232500000	152570000	91655000	5	4	3	27
P07205	P07205	7	2	2	0	0	42532000	Phosphoglycerate kinase 2	PGK2		1	7	2	2	6	6	7	1	1	2	1	1	2	17.7	3.6	3.6	44.796	417	417	1	20	0.0093671	1.713	16.1	16.1	17.7	351660000	13293000	12997000	42759000	1	1	1	7
P07237;H7BZ94;F5H8J2;H0Y3Z3;I3L398;I3L312;I3L3U6;I3L0S0;I3NI03;I3L4M2;I3L514;I3L3P5;I3L1Y5	P07237;H7BZ94;F5H8J2;H0Y3Z3	35;32;31;19;15;13;10;9;9;8;5;5;2	35;32;31;19;15;13;10;9;9;8;5;5;2	35;32;31;19;15;13;10;9;9;8;5;5;2	20375000000	18543000000	18883000000	Protein disulfide-isomerase	P4HB	;;;	13	35	35	35	34	33	32	34	33	32	34	33	32	69.7	69.7	69.7	57.116	508	508;464;451;274;200;208;188;148;166;117;106;156;54	1	823	0	323.31	66.7	60.8	59.1	237200000000	21315000000	17089000000	18561000000	55	47	46	611
P07305;P07305-2	P07305;P07305-2	4;3	4;3	4;3	323920000	275530000	285610000	Histone H1.0;Histone H1.0, N-terminally processed	H1F0	;	2	4	4	4	4	4	4	4	4	4	4	4	4	21.6	21.6	21.6	20.863	194	194;177	1	69	0	12.539	21.6	21.6	21.6	3033400000	294350000	268310000	304240000	3	1	1	25
P07311;G3V2U7;G3V3F8;G3V597;P07311-2	P07311;G3V2U7	5;4;1;1;1	5;4;1;1;1	5;4;1;1;1	1436200000	1489500000	1535700000	Acylphosphatase-1;Acylphosphatase	ACYP1	;	5	5	5	5	4	5	4	4	5	4	4	5	4	60.6	60.6	60.6	11.261	99	99;129;37;62;55	1	63	0	15.27	44.4	60.6	50.5	19541000000	1709100000	1232800000	2711500000	1	3	4	31
P07339;C9JH19;H7C469;F8WD96;H7C1V0;F8W787	P07339;C9JH19;H7C469;F8WD96	17;11;11;9;7;6	17;11;11;9;7;6	17;11;11;9;7;6	4637300000	4174200000	4324500000	Cathepsin D;Cathepsin D light chain;Cathepsin D heavy chain	CTSD	;;;	6	17	17	17	17	16	16	17	16	16	17	16	16	53.2	53.2	53.2	44.552	412	412;299;379;276;189;199	1	362	0	323.31	53.2	53.2	53.2	55266000000	4854400000	3973300000	4136800000	21	22	20	257
P07355;P07355-2;H0YN42;H0YMD0;H0YMU9;A6NMY6;H0YM50;H0YKS4;H0YNP5;H0YN28;H0YL33;H0YMM1;H0YKZ7;H0YLV6;H0YMT9;H0YKX9;H0YKL9;H0YMW4;H0YNA0;H0YN52;H0YKV8;H0YMD9;H0YNB8;H0YKN4;H0YLE2	P07355;P07355-2;H0YN42;H0YMD0;H0YMU9;A6NMY6;H0YM50;H0YKS4;H0YNP5	29;28;24;23;23;21;20;18;15;13;13;13;11;11;11;11;10;10;9;7;7;6;5;5;2	29;28;24;23;23;21;20;18;15;13;13;13;11;11;11;11;10;10;9;7;7;6;5;5;2	29;28;24;23;23;21;20;18;15;13;13;13;11;11;11;11;10;10;9;7;7;6;5;5;2	39180000000	39783000000	39938000000	Annexin A2;Annexin;Putative annexin A2-like protein	ANXA2;ANXA2P2	;;;;;;;;	25	29	29	29	28	29	27	28	29	27	28	29	27	74.6	74.6	74.6	38.604	339	339;357;256;227;230;339;248;176;175;139;142;149;119;132;133;134;110;146;79;59;81;65;47;69;45	1	622	0	323.31	69.6	74.6	67.6	481750000000	41352000000	35656000000	39504000000	42	39	43	511
P07384;E9PRM1;E9PLX0;E9PJJ3;E9PLC9;E9PMC6;E9PJA6;E9PSA6;E9PQB3;E9PL37;E9PIA9	P07384	31;5;4;4;4;4;4;4;4;4;3	31;5;4;4;4;4;4;4;4;4;3	31;5;4;4;4;4;4;4;4;4;3	1128400000	1154100000	1079100000	Calpain-1 catalytic subunit	CAPN1		11	31	31	31	27	25	24	27	25	24	27	25	24	53.4	53.4	53.4	81.889	714	714;201;122;135;148;152;161;163;191;191;63	1	369	0	144.55	44.4	39.5	38.1	13658000000	1183000000	1116400000	985910000	20	17	15	193
P07686;Q5URX0;H0YA83;H0Y9B6;D6REQ8;H0Y9M3	P07686;Q5URX0	15;12;6;6;1;1	15;12;6;6;1;1	15;12;6;6;1;1	829810000	736020000	763190000	Beta-hexosaminidase subunit beta;Beta-hexosaminidase subunit beta chain B;Beta-hexosaminidase subunit beta chain A	HEXB	;	6	15	15	15	15	13	13	15	13	13	15	13	13	37.1	37.1	37.1	63.111	556	556;331;170;202;35;52	1	211	0	60.552	37.1	28.1	30.2	9789400000	945280000	641260000	680770000	14	9	10	135
P07711;Q5T8F0;Q5QP40;P43235;O60911	P07711;Q5T8F0	8;4;1;1;1	8;4;1;1;1	7;3;0;0;0	1529100000	1354300000	1682900000	Cathepsin L1;Cathepsin L1 heavy chain;Cathepsin L1 light chain	CTSL	;	5	8	8	7	6	7	7	6	7	7	5	6	6	41.1	41.1	39	37.564	333	333;225;258;329;334	1	124	0	88.105	31.2	34.2	34.2	17968000000	1727300000	1555000000	1672600000	10	4	6	75
P07741;H3BQZ9;P07741-2;H3BQB1;H3BQF1;H3BSW3	P07741;H3BQZ9;P07741-2;H3BQB1;H3BQF1	10;8;8;7;6;4	10;8;8;7;6;4	10;8;8;7;6;4	526100000	590100000	586470000	Adenine phosphoribosyltransferase	APRT	;;;;	6	10	10	10	9	9	8	9	9	8	9	9	8	70.6	70.6	70.6	19.608	180	180;153;134;162;148;63	1	119	0	150.55	63.3	64.4	59.4	6767400000	595310000	660480000	577690000	7	9	5	67
P07814;V9GYZ6;V9GZ76	P07814;V9GYZ6	66;43;5	66;43;5	66;43;5	5983100000	5678400000	5694300000	Bifunctional glutamate/proline--tRNA ligase;Glutamate--tRNA ligase;Proline--tRNA ligase	EPRS	;	3	66	66	66	57	53	55	57	53	55	57	53	55	57.7	57.7	57.7	170.59	1512	1512;968;194	1	980	0	323.31	52	50	48.6	72363000000	6617600000	5622100000	5389600000	51	44	49	585
P07858;R4GMQ5;E9PR54;E9PJ67;E9PCB3;E9PKQ7;E9PNL5;E9PHZ5;E9PLY3;E9PSG5;E9PQM1;E9PS78	P07858	8;2;2;2;2;2;2;2;2;2;2;1	8;2;2;2;2;2;2;2;2;2;2;1	8;2;2;2;2;2;2;2;2;2;2;1	638880000	597470000	558970000	Cathepsin B;Cathepsin B light chain;Cathepsin B heavy chain	CTSB		12	8	8	8	8	7	8	8	7	8	8	7	8	31	31	31	37.821	339	339;76;98;101;110;136;143;148;165;170;175;92	1	126	0	38.266	31	25.7	31	7115400000	624270000	594760000	569970000	5	5	4	69
P07900;P07900-2;Q86U12;G3V2J8;Q14568;Q58FG0	P07900;P07900-2;Q86U12	45;45;31;10;8;7	28;28;19;5;2;3	27;27;18;5;2;3	18272000000	16107000000	16407000000	Heat shock protein HSP 90-alpha	HSP90AA1	;;	6	45	28	27	43	43	42	26	26	25	25	25	24	57.9	38.7	37.7	84.659	732	732;854;413;174;343;334	1	723	0	323.31	57.4	57.4	57.2	209030000000	20152000000	16249000000	16373000000	55	49	55	666
P07919	P07919	4	4	4	460230000	373160000	396050000	Cytochrome b-c1 complex subunit 6, mitochondrial	UQCRH		1	4	4	4	4	4	4	4	4	4	4	4	4	38.5	38.5	38.5	10.739	91	91	1	61	0	208.03	38.5	38.5	38.5	4966400000	450580000	389130000	444730000	2	4	5	38
P07954-2;P07954	P07954-2;P07954	20;19	20;19	20;19	1415200000	1586100000	1492200000	Fumarate hydratase, mitochondrial	FH	;	2	20	20	20	18	15	13	18	15	13	18	15	13	65.5	65.5	65.5	50.212	467	467;510	1	284	0	261.34	61.9	49.5	38.8	18152000000	1651200000	1535100000	1262500000	19	18	13	189
P08107;P08107-2;E7EP94;V9GZ37	P08107;P08107-2;E7EP94;V9GZ37	40;36;33;29	36;32;31;27	18;15;14;12	23325000000	23215000000	21894000000	Heat shock 70 kDa protein 1A	HSPA1A	;;;	4	40	36	18	35	38	35	31	34	31	14	17	15	72.7	67.4	36.3	70.051	641	641;586;550;476	1	783	0	323.31	64.6	69.6	59.6	275640000000	24385000000	23778000000	21537000000	68	54	59	705
P08133;P08133-2;E7EMC6	P08133;P08133-2;E7EMC6	31;30;16	31;30;16	1;1;1	1335600000	1299200000	1259700000	Annexin A6;Annexin	ANXA6	;;	3	31	31	1	27	29	26	27	29	26	1	1	1	53.9	53.9	3	75.872	673	673;641;330	1	421	0	142.01	48.4	51.7	44.4	16239000000	1397800000	1277500000	1311800000	14	16	14	197
P08237;P08237-3;P08237-2;F8VNX2;F8VZQ1;F8VX13;F8VP00;F8VSL1;F8W1J8;F8VSF7;F8VW30;F8VUB8;F8VYK8;F8VTQ3;F8VZI0;F8VVE3;F8VZ53;F8VSF5;H0YIS9	P08237;P08237-3;P08237-2	27;26;25;7;7;6;6;5;4;4;4;3;3;3;3;2;1;1;1	25;24;24;7;7;6;6;5;4;4;4;3;3;3;3;2;1;1;1	24;23;24;7;7;6;6;5;4;4;4;3;3;3;3;2;1;1;1	1380600000	1271800000	1431000000	ATP-dependent 6-phosphofructokinase, muscle type	PFKM	;;	19	27	25	24	23	22	22	21	21	21	20	20	20	45.9	43.6	42.4	85.182	780	780;851;749;157;161;156;176;139;84;102;116;141;149;149;152;165;59;73;97	1	328	0	248.43	40.3	37.8	39.2	17153000000	1557700000	1374000000	1468300000	19	11	16	186
P08238	P08238	54	53	20	49493000000	50046000000	50570000000	Heat shock protein HSP 90-beta	HSP90AB1		1	54	53	20	53	51	49	52	50	48	19	18	17	70.4	68.8	32.5	83.263	724	724	1	1641	0	323.31	70.4	65.2	65.2	639040000000	54608000000	47354000000	51560000000	114	107	112	1368
P08240;P08240-2	P08240;P08240-2	17;16	17;16	17;16	588320000	530540000	539590000	Signal recognition particle receptor subunit alpha	SRPR	;	2	17	17	17	16	14	14	16	14	14	16	14	14	31.5	31.5	31.5	69.81	638	638;610	1	213	0	57.102	29.2	26.3	26.5	6852000000	662050000	486440000	504830000	11	6	7	100
P08243-2;P08243;P08243-3;F8WEJ5;C9J057;C9JT45;C9JM09;C9JLN6	P08243-2;P08243;P08243-3;F8WEJ5	9;9;8;6;4;3;2;1	9;9;8;6;4;3;2;1	9;9;8;6;4;3;2;1	120620000	131220000	152520000	Asparagine synthetase [glutamine-hydrolyzing]	ASNS	;;;	8	9	9	9	7	6	7	7	6	7	7	6	7	25	25	25	62.168	540	540;561;478;401;214;162;118;63	1	79	0	20.581	20.7	15.4	18.1	1658700000	147760000	126410000	118040000	5	2	2	42
P08397-2;P08397;F5H345;F5GY90;P08397-4;P08397-3;F5H226;F5H0P4	P08397-2;P08397;F5H345;F5GY90;P08397-4;P08397-3;F5H226	6;6;5;4;4;4;3;1	6;6;5;4;4;4;3;1	6;6;5;4;4;4;3;1	35016000	0	45279000	Porphobilinogen deaminase	HMBS	;;;;;;	8	6	6	6	4	3	5	4	3	5	4	3	5	25.6	25.6	25.6	37.699	344	344;361;330;187;304;321;191;119	1	37	0	8.6752	20.9	7.8	23.3	569210000	39801000	18675000	59752000	2	1	4	17
P08559;P08559-4;P08559-3;P08559-2;Q5JPU3;Q5JPU0;Q5JPT9;Q5JPU1;P29803	P08559;P08559-4;P08559-3;P08559-2	16;16;15;15;4;4;4;4;3	16;16;15;15;4;4;4;4;3	16;16;15;15;4;4;4;4;3	828180000	740700000	842490000	Pyruvate dehydrogenase E1 component subunit alpha, somatic form, mitochondrial	PDHA1	;;;	9	16	16	16	13	12	12	13	12	12	13	12	12	57.2	57.2	57.2	43.295	390	390;428;359;397;109;180;203;205;388	1	195	0	93.257	44.4	37.2	37.2	9894500000	829320000	729320000	781070000	10	7	8	121
P08572	P08572	7	7	7	170560000	174430000	165070000	Collagen alpha-2(IV) chain;Canstatin	COL4A2		1	7	7	7	6	6	6	6	6	6	6	6	6	5.5	5.5	5.5	167.55	1712	1712	1	78	0	13.396	4.6	4.6	4.6	2445600000	187860000	195710000	182720000	1	1	0	21
P08574	P08574	12	12	12	1497800000	1570200000	1509900000	Cytochrome c1, heme protein, mitochondrial	CYC1		1	12	12	12	11	12	10	11	12	10	11	12	10	39.7	39.7	39.7	35.422	325	325	1	190	0	248.01	39.7	39.7	34.8	17233000000	1555800000	1455000000	1409600000	12	10	8	110
P08579	P08579	7	5	5	277830000	274350000	247270000	U2 small nuclear ribonucleoprotein B	SNRPB2		1	7	5	5	7	7	7	5	5	5	5	5	5	32	25.3	25.3	25.486	225	225	1	72	0	17.902	32	32	32	3060600000	305660000	268220000	278090000	1	2	2	26
P08581;P08581-2;P08581-3;B4DPY6;H7C174;H7C130;C9JKM5;H7C3Z8;H7C074;B4DY49;Q9H3Y6;P42685;P12931;P12931-2;Q04912-2;Q04912	P08581;P08581-2	33;32;15;9;7;2;2;1;1;1;1;1;1;1;1;1	33;32;15;9;7;2;2;1;1;1;1;1;1;1;1;1	33;32;15;9;7;2;2;1;1;1;1;1;1;1;1;1	802780000	767260000	761010000	Hepatocyte growth factor receptor	MET	;	16	33	33	33	28	25	26	28	25	26	28	25	26	30.6	30.6	30.6	155.54	1390	1390;1408;764;260;214;158;190;270;285;363;488;505;536;542;1351;1400	1	341	0	94.174	27.1	22.3	22.9	9627400000	857550000	702820000	817000000	16	12	15	178
P08621-2;P08621;P08621-3;M0QYR1;P08621-4;M0QX04	P08621-2;P08621;P08621-3	16;16;9;7;6;2	16;16;9;7;6;2	16;16;9;7;6;2	1472100000	1537100000	1364400000	U1 small nuclear ribonucleoprotein 70 kDa	SNRNP70	;;	6	16	16	16	13	11	14	13	11	14	13	11	14	31.1	31.1	31.1	50.617	428	428;437;166;94;341;33	1	220	0	56.776	30.4	25	27.3	16820000000	1488200000	1220900000	1303900000	12	9	10	120
P08648;H0YIV7	P08648	27;4	27;4	27;4	2308500000	2287000000	2378100000	Integrin alpha-5;Integrin alpha-5 heavy chain;Integrin alpha-5 light chain	ITGA5		2	27	27	27	25	23	26	25	23	26	25	23	26	40.1	40.1	40.1	114.54	1049	1049;119	1	395	0	235.33	37.2	32.5	38.8	29207000000	2293400000	2219400000	2506300000	22	17	24	255
P08651-4;P08651-5;P08651-3;P08651-6;P08651-2;P08651	P08651-4;P08651-5;P08651-3;P08651-6;P08651-2;P08651	4;4;4;4;4;4	4;4;4;4;4;4	3;3;3;3;3;3	0	62347000	0	Nuclear factor 1 C-type	NFIC	;;;;;	6	4	4	3	2	2	3	2	2	3	1	1	2	15.8	15.8	13.1	45.412	406	406;428;430;439;499;508	1	27	0	5.2891	5.2	5.4	13.3	655670000	37230000	43182000	63365000	1	0	2	12
P08670;B0YJC4;B0YJC5;Q5JVS8;H7C5W5;P41219;P41219-2;P14136-3;P14136;P14136-2;K7EKH6;F8W835;E7EMV2;E7ESP9;Q16352;P07197-2;P07196;P07197	P08670;B0YJC4;B0YJC5	37;35;19;11;4;4;4;2;2;2;1;1;1;1;1;1;1;1	34;32;17;11;2;2;2;1;1;1;1;1;1;1;1;1;1;1	31;29;16;11;2;2;2;1;1;1;1;1;0;0;0;0;0;0	4319400000	4742500000	4604200000	Vimentin	VIM	;;	18	37	34	31	35	33	34	32	30	31	29	28	28	77.9	74.5	69.7	53.651	466	466;431;228;173;200;470;471;431;432;438;191;207;698;877;499;541;543;916	1	551	0	260.83	74.2	70.6	75.5	52745000000	4263700000	4556100000	4724000000	36	29	33	367
P08754	P08754	14	7	7	253060000	293500000	269250000	Guanine nucleotide-binding protein G(k) subunit alpha	GNAI3		1	14	7	7	12	12	11	6	6	5	6	6	5	49.4	28	28	40.532	354	354	1	97	0	92.774	44.9	44.1	41.2	3336700000	275960000	285100000	294580000	7	5	5	70
P08758;D6RBL5;D6RBE9;E9PHT9;D6RCN3	P08758;D6RBL5;D6RBE9	25;18;17;11;3	25;18;17;11;3	25;18;17;11;3	16402000000	16230000000	15849000000	Annexin A5;Annexin	ANXA5	;;	5	25	25	25	22	23	23	22	23	23	22	23	23	78.8	78.8	78.8	35.936	320	320;260;220;163;35	1	545	0	323.31	76.6	76.6	76.6	200740000000	17727000000	15509000000	16369000000	40	39	35	466
P09012;M0R268;M0R221;M0R2B8;M0QZG7;M0QXK2;M0R0G9	P09012;M0R268;M0R221;M0R2B8;M0QZG7;M0QXK2	12;10;7;7;7;6;4	12;10;7;7;7;6;4	10;8;6;6;6;5;3	727970000	710910000	688350000	U1 small nuclear ribonucleoprotein A	SNRPA	;;;;;	7	12	12	10	9	11	11	9	11	11	7	9	9	45.7	45.7	40.4	31.279	282	282;256;142;148;184;128;87	1	161	0	108.3	42.6	42.9	42.9	8278800000	581810000	723030000	771660000	7	4	7	76
[truncated: 2,444 more rows]
