# Supplementary material for: Trimming nano delivery at the cell side by tuning ARF6 GTPases to the GTP-bound form
Source: Research Square preprint supplement (doi:10.21203/rs.3.rs-1884888/v1), 2022-08-11
Supplement: Supplementary file 5 [file eed496625bdee4603fdc5396.xlsx]

## Sheet: Table4
LFQ Proteomics identification (Search Result) of total cellular proteins of Hela cells after transfected with ARF6GDP plasmids
Protein IDs	Majority protein IDs	Peptide counts (all)	Peptide counts (razor+unique)	Peptide counts (unique)	LFQ intensity T27N-1	LFQ intensity T27N-2	LFQ intensity T27N-3	Protein names	Gene names	Fasta headers	Number of proteins	Peptides	Razor + unique peptides	Unique peptides	Peptides T27N-1	Peptides T27N-2	Peptides T27N-3	Razor + unique peptides T27N-1	Razor + unique peptides T27N-2	Razor + unique peptides T27N-3	Unique peptides T27N-1	Unique peptides T27N-2	Unique peptides T27N-3	Sequence coverage [%]	Unique + razor sequence coverage [%]	Unique sequence coverage [%]	Mol. weight [kDa]	Sequence length	Sequence lengths	Fraction average	Fraction 1	Q-value	Score	Sequence coverage T27N-1 [%]	Sequence coverage T27N-2 [%]	Sequence coverage T27N-3 [%]	Intensity	Intensity T27N-1	Intensity T27N-2	Intensity T27N-3	MS/MS count T27N-1	MS/MS count T27N-2	MS/MS count T27N-3	MS/MS count
A0MZ66;A0MZ66-3;A0MZ66-4;A0MZ66-6;A0MZ66-5;A0MZ66-8;A0MZ66-2;A0MZ66-7	A0MZ66;A0MZ66-3;A0MZ66-4;A0MZ66-6;A0MZ66-5;A0MZ66-8;A0MZ66-2	14;14;13;13;12;11;10;4	14;14;13;13;12;11;10;4	14;14;13;13;12;11;10;4	160820000	154470000	172570000	Shootin-1	KIAA1598	;;;;;;	8	14	14	14	9	7	8	9	7	8	9	7	8	29.6	29.6	29.6	71.639	631	631;649;558;601;571;498;456;219	1	107	0	31.07	19.7	16.3	18.9	1914600000	153180000	152620000	132340000	3	3	2	36
A1L0T0;M0R026;E9PJS0;E9PL44;M0QZX5;M0R1B5	A1L0T0;M0R026	11;9;4;3;3;2	11;9;4;3;3;2	11;9;4;3;3;2	183380000	179910000	174740000	Acetolactate synthase-like protein	ILVBL	;	6	11	11	11	7	7	8	7	7	8	7	7	8	30.7	30.7	30.7	67.867	632	632;525;262;166;229;165	1	133	0	38.709	20.4	18.8	21.4	2397800000	188760000	229180000	179710000	5	7	5	65
A1X283;G3V144;H0Y507;Q5TCZ1-3;Q5TCZ1	A1X283;G3V144	5;3;1;1;1	5;3;1;1;1	5;3;1;1;1	0	0	37096000	SH3 and PX domain-containing protein 2B	SH3PXD2B	;	5	5	5	5	2	2	2	2	2	2	2	2	2	6.4	6.4	6.4	101.58	911	911;430;1060;1105;1133	1	30	0.0012591	2.7415	2.5	2.5	2	330220000	5116900	4909600	22773000	2	1	1	12
A2A2Q9;Q9Y312	A2A2Q9;Q9Y312	5;5	5;5	5;5	44116000	31556000	20819000	Protein AAR2 homolog	AAR2	;	2	5	5	5	3	3	3	3	3	3	3	3	3	17.8	17.8	17.8	45.034	398	398;384	1	26	0	12.61	10.1	10.1	10.1	236950000	39174000	36243000	23001000	2	2	0	9
A2A2V1;P04156-2;P04156;X6RKS3	A2A2V1;P04156-2;P04156;X6RKS3	2;2;2;1	2;2;2;1	2;2;2;1	30618000	39403000	38143000	Major prion protein	PRNP	;;;	4	2	2	2	2	2	2	2	2	2	2	2	2	9.6	9.6	9.6	27.278	249	249;246;253;217	1	24	0	5.3416	9.6	9.6	9.6	392430000	28926000	41800000	39544000	1	2	1	11
A2A3N6;B4DY52	A2A3N6	5;2	3;2	0;0	24977000	27479000	0	Putative PIP5K1A and PSMD4-like protein	PIPSL		2	5	3	0	4	3	1	2	2	0	0	0	0	7.1	4.3	0	95.047	862	862;198	1	17	0	6.5469	6.1	5.3	2	231350000	23315000	30731000	0	1	2	0	11
A2ACR1;P28065-2;P28065;A2ACR0;B4DZW2;A2ACQ9	A2ACR1;P28065-2;P28065;A2ACR0	6;6;6;4;2;2	6;6;6;4;2;2	6;6;6;4;2;2	308300000	279050000	218810000	Proteasome subunit beta type;Proteasome subunit beta type-9	PSMB9	;;;	6	6	6	6	4	4	5	4	4	5	4	4	5	41.8	41.8	41.8	20.96	196	196;209;219;131;154;178	1	62	0	24.581	27	27	33.2	3111800000	302750000	306250000	232680000	3	3	1	37
A2AE51;A2AE48;Q12899;Q5SPU2	A2AE51;A2AE48;Q12899	3;3;3;1	3;3;3;1	3;3;3;1	0	28546000	0	Tripartite motif-containing protein 26	TRIM26	;;	4	3	3	3	2	3	0	2	3	0	2	3	0	19.5	19.5	19.5	18.35	159	159;248;539;157	1	19	0.009755	1.6486	13.2	19.5	0	220440000	28047000	34695000	0	0	1	0	3
A2AEA2;P10321;F8W9Z8	A2AEA2;P10321	14;14;3	1;1;0	1;1;0	828050000	1168300000	1360400000	HLA class I histocompatibility antigen, Cw-7 alpha chain	HLA-C	;	3	14	1	1	13	13	13	1	1	1	1	1	1	40.9	4.3	4.3	41.301	372	372;366;131	1	127	0	29.846	36.3	39.5	39.5	17767000000	1469800000	1394300000	1609000000	7	5	5	72
A2IDC6;Q4TT38;Q13084;A2IDC7;Q4TT37	A2IDC6;Q4TT38;Q13084;A2IDC7;Q4TT37	4;4;4;3;3	4;4;4;3;3	4;4;4;3;3	0	28323000	39756000	39S ribosomal protein L28, mitochondrial	MRPL28	;;;;	5	4	4	4	1	2	3	1	2	3	1	2	3	18.3	18.3	18.3	28.506	240	240;256;256;194;218	1	26	0.00315	2.317	3.8	7.9	13.3	359880000	15119000	23018000	35863000	1	2	2	11
A4D1E9;A4D1E9-2;C9J8R7;C9JNI1;C9JEQ8	A4D1E9;A4D1E9-2	5;4;2;2;2	5;4;2;2;2	5;4;2;2;2	36400000	34523000	0	GTP-binding protein 10	GTPBP10	;	5	5	5	5	3	4	1	3	4	1	3	4	1	17.3	17.3	17.3	42.932	387	387;308;210;236;242	1	52	0	13.909	10.6	14.5	5.7	491770000	24485000	44073000	13454000	2	1	1	12
A4D212;Q8N201	A4D212;Q8N201	3;3	3;3	3;3	0	0	268500000	Integrator complex subunit 1	DKFZP586J0619;INTS1	;	2	3	3	3	1	0	1	1	0	1	1	0	1	1.2	1.2	1.2	265.75	2394	2394;2190	1	8	0.00026096	3.225	0.3	0	0.4	518300000	5364700	0	238810000	0	0	0	3
A5YKK6;A5YKK6-2;A5YKK6-3;A5YKK6-4;B5MDN3;H3BMZ2;H3BVC9;H3BT18;H3BU44;H3BNB1;H3BR89;H3BMH0	A5YKK6;A5YKK6-2;A5YKK6-3;A5YKK6-4;B5MDN3	30;29;26;17;15;7;2;1;1;1;1;1	30;29;26;17;15;7;2;1;1;1;1;1	30;29;26;17;15;7;2;1;1;1;1;1	278380000	299040000	272800000	CCR4-NOT transcription complex subunit 1	CNOT1	;;;;	12	30	30	30	23	21	22	23	21	22	23	21	22	16.7	16.7	16.7	266.94	2376	2376;2371;2150;1551;1227;439;241;62;96;185;193;277	1	232	0	54.148	11.7	10.7	11.6	3491200000	345620000	325180000	269380000	5	9	5	83
A6NDG6;H3BV17	A6NDG6	13;2	13;2	13;2	602420000	502910000	602790000	Phosphoglycolate phosphatase	PGP		2	13	13	13	13	13	13	13	13	13	13	13	13	48.6	48.6	48.6	34.006	321	321;57	1	170	0	112.75	48.6	48.6	48.6	6497400000	723000000	632180000	480960000	11	8	9	103
A6NDU8	A6NDU8	5	5	5	86215000	85744000	94671000	UPF0600 protein C5orf51	C5orf51		1	5	5	5	5	4	2	5	4	2	5	4	2	26.5	26.5	26.5	33.62	294	294	1	40	0	14.691	26.5	23.1	8.5	1048500000	129210000	104770000	46819000	2	3	2	19
A6NEL0;P05114;A6NL93;F2Z2W6;F2Z2Y5;H7BXJ5	A6NEL0;P05114;A6NL93	4;4;3;1;1;1	4;4;3;1;1;1	4;4;3;1;1;1	84279000	0	120780000	Non-histone chromosomal protein HMG-14	HMGN1	;;	6	4	4	4	4	1	3	4	1	3	4	1	3	36.2	36.2	36.2	12.435	116	116;100;90;44;45;48	1	39	0	8.333	36.2	8.6	26.7	1490600000	103260000	76964000	109400000	1	1	2	19
A6NEM2;P51610-2;P51610;P51610-4;P51610-3;H7C1C4;Q9Y5Z7	A6NEM2;P51610-2;P51610;P51610-4	17;17;17;17;6;3;1	17;17;17;17;6;3;1	17;17;17;17;6;3;1	271570000	289800000	344620000	Host cell factor 1;HCF N-terminal chain 1;HCF N-terminal chain 2;HCF N-terminal chain 3;HCF N-terminal chain 4;HCF N-terminal chain 5;HCF N-terminal chain 6;HCF C-terminal chain 1;HCF C-terminal chain 2;HCF C-terminal chain 3;HCF C-terminal chain 4;HCF C-terminal chain 5;HCF C-terminal chain 6	HCFC1	;;;	7	17	17	17	10	13	11	10	13	11	10	13	11	12.4	12.4	12.4	213.47	2080	2080;1966;2035;2079;428;611;792	1	161	0	46.034	6.4	8.9	8.4	3482000000	238710000	352050000	274710000	3	5	7	62
A6NFX8;Q9UKK9;A6NJU6;A6NCQ0;H0YEY4;C9JYY9	A6NFX8;Q9UKK9;A6NJU6;A6NCQ0	14;14;10;8;5;3	14;14;10;8;5;3	14;14;10;8;5;3	1533700000	1560700000	1419300000	ADP-sugar pyrophosphatase	NUDT5	;;;	6	14	14	14	13	14	14	13	14	14	13	14	14	66.8	66.8	66.8	25.895	232	232;219;186;180;137;97	1	267	0	102.2	60.8	66.8	66.8	18592000000	1734900000	1671700000	1193800000	17	18	16	189
A6NG79;Q92733;H0YE12;H0Y679	A6NG79;Q92733;H0YE12;H0Y679	2;2;1;1	2;2;1;1	2;2;1;1	28433000	28836000	0	Proline-rich protein PRCC	PRCC	;;;	4	2	2	2	2	2	1	2	2	1	2	2	1	7	7	7	48.959	459	459;491;198;257	1	18	0	3.8262	7	7	4.6	291490000	30503000	33803000	19257000	0	0	1	8
A6NGJ0;P51808;F2Z328	A6NGJ0;P51808;F2Z328	2;2;1	2;2;1	2;2;1	0	44512000	0	Dynein light chain Tctex-type 3	DYNLT3	;;	3	2	2	2	1	2	1	1	2	1	1	2	1	33.6	33.6	33.6	16.979	152	152;116;122	1	10	0.00026853	3.5903	22.4	33.6	11.2	302500000	34898000	50012000	42534000	1	0	1	3
A6NGP5;Q9H910;B4DLH4;H3BU16;H3BMV3;Q9H910-2;H3BMT0;H3BTV5;H3BMM8;B4E1P3	A6NGP5;Q9H910;B4DLH4;H3BU16;H3BMV3;Q9H910-2;H3BMT0;H3BTV5	5;5;5;4;4;4;3;3;2;2	5;5;5;4;4;4;3;3;2;2	5;5;5;4;4;4;3;3;2;2	135040000	132630000	123410000	Hematological and neurological expressed 1-like protein	HN1L	;;;;;;;	10	5	5	5	4	4	4	4	4	4	4	4	4	43.3	43.3	43.3	18.906	178	178;190;218;167;190;174;115;116;70;98	1	57	0	16.793	29.8	29.8	38.8	1369400000	134130000	149070000	103020000	3	4	5	36
A6NGW1;O95070;E9PIZ0;C9JST7;E9PS11	A6NGW1;O95070;E9PIZ0;C9JST7	4;4;3;3;1	4;4;3;3;1	4;4;3;3;1	107840000	108960000	114910000	Protein YIF1A	YIF1A	;;;	5	4	4	4	3	4	4	3	4	4	3	4	4	24.1	24.1	24.1	26.377	241	241;293;160;199;79	1	49	0	15.697	19.1	24.1	24.1	1366200000	97541000	154870000	86512000	3	2	3	22
A6NHL2-2;A6NHL2	A6NHL2-2;A6NHL2	4;4	1;1	1;1	0	0	431640000	Tubulin alpha chain-like 3	TUBAL3	;	2	4	1	1	4	4	4	1	1	1	1	1	1	10.3	4.2	4.2	45.517	406	406;446	1	26	0	51.126	10.3	10.3	10.3	7073400000	716180000	469160000	383910000	3	1	1	18
A6NHN2;Q4VXB0;Q9HBD1-2;Q9HBD1-3;Q9HBD1-6;Q9HBD1-4;Q9HBD1;Q5TC82-2;Q5TC82	A6NHN2;Q4VXB0;Q9HBD1-2;Q9HBD1-3;Q9HBD1-6;Q9HBD1-4;Q9HBD1;Q5TC82-2;Q5TC82	2;2;2;2;2;2;2;1;1	2;2;2;2;2;2;2;1;1	2;2;2;2;2;2;2;1;1	0	0	59299000	Roquin-2;Roquin-1	RC3H2;RC3H1	;;;;;;;;	9	2	2	2	0	0	2	0	0	2	0	0	2	4.9	4.9	4.9	56.823	506	506;935;478;506;869;1064;1191;1125;1133	1	10	0.0017465	2.6317	0	0	4.9	293660000	0	0	52741000	0	0	0	1
A6NHR9;A6NHR9-2;J3KTL8;A6NHR9-3;J3KRK8;J3QSH1	A6NHR9;A6NHR9-2;J3KTL8;A6NHR9-3	16;15;12;10;1;1	16;15;12;10;1;1	16;15;12;10;1;1	126490000	160920000	114310000	Structural maintenance of chromosomes flexible hinge domain-containing protein 1	SMCHD1	;;;	6	16	16	16	10	13	8	10	13	8	10	13	8	9.9	9.9	9.9	226.37	2005	2005;1917;1388;762;49;150	1	118	0	25.937	5.7	8.3	4.2	1750700000	134520000	208070000	108330000	2	4	4	42
A6NLH6;Q9P003	A6NLH6;Q9P003	1;1	1;1	1;1	0	160280000	146770000	Protein cornichon homolog 4	CNIH4	;	2	1	1	1	1	1	1	1	1	1	1	1	1	14.6	14.6	14.6	15.771	137	137;139	1	36	0	24.982	14.6	14.6	14.6	1844800000	169640000	209970000	191150000	1	2	2	21
A6NML8;C9J6U3;K4DI95;O60879-2;O60879-3;O60879	A6NML8;C9J6U3;K4DI95;O60879-2;O60879-3;O60879	3;3;3;3;3;3	3;3;3;3;3;3	3;3;3;3;3;3	0	0	12936000	Protein diaphanous homolog 2	DIAPH2	;;;;;	6	3	3	3	0	1	2	0	1	2	0	1	2	3	3	3	124.85	1096	1096;1097;1101;1096;1097;1101	1	17	0.0069897	1.9163	0	0.6	1.9	113800000	0	5949800	11506000	0	0	0	3
A6NMQ1;P09884	A6NMQ1;P09884	5;5	5;5	5;5	31074000	34946000	0	DNA polymerase;DNA polymerase alpha catalytic subunit	POLA1	;	2	5	5	5	4	3	2	4	3	2	4	3	2	5.1	5.1	5.1	166.46	1468	1468;1462	1	38	0	14.699	4.4	2.5	2.2	287140000	28393000	31885000	18825000	3	0	1	12
A6NMQ3;C9JUF4;Q5T5H1;O43768-2;O43768;O43768-9;O43768-3;O43768-4;O43768-6;O43768-5;O43768-7;O43768-8;H3BQ52	A6NMQ3;C9JUF4;Q5T5H1;O43768-2;O43768;O43768-9;O43768-3;O43768-4;O43768-6;O43768-5;O43768-7;O43768-8	7;7;7;7;7;7;7;7;5;5;5;4;1	7;7;7;7;7;7;7;7;5;5;5;4;1	6;6;6;6;6;6;6;6;4;4;4;4;0	385640000	335230000	343850000	Alpha-endosulfine	ENSA	;;;;;;;;;;;	13	7	7	6	6	6	6	6	6	6	5	5	5	52.1	52.1	44.3	15.634	140	140;144;187;117;121;133;137;140;113;117;133;105;71	1	103	0	17.862	47.9	45.7	40	4737300000	447250000	317230000	301100000	2	2	5	47
A6NN80;E5RK69;E5RK63;E5RJF5;E5RI05;E5RFF0;E5RIU8;E5RJR0;H0YC77	A6NN80;E5RK69	31;19;9;8;7;6;5;5;1	1;1;0;0;0;0;0;0;0	1;1;0;0;0;0;0;0;0	0	0	5917300	Annexin	ANXA6	;	9	31	1	1	26	26	26	0	0	1	0	0	1	53.5	2.1	2.1	75.276	667	667;460;150;129;129;156;95;110;91	1	8	0.0036023	2.2184	45.1	46.6	47.2	69599000	0	0	5262900	0	0	0	2
A6NNI4;G8JLH6;P21926;F5GXT1	A6NNI4;G8JLH6;P21926	3;3;3;1	3;3;3;1	3;3;3;1	287310000	256790000	277850000	Tetraspanin;CD9 antigen	CD9	;;	4	3	3	3	3	3	3	3	3	3	3	3	3	26.4	26.4	26.4	17.764	159	159;228;228;141	1	52	0	25.556	26.4	26.4	26.4	2776200000	309040000	307280000	243810000	4	3	3	36
A6NNK5;Q12888;Q12888-3;Q12888-2;C9JXV0	A6NNK5;Q12888;Q12888-3;Q12888-2;C9JXV0	2;2;2;2;1	2;2;2;2;1	2;2;2;2;1	125800000	126750000	139250000	Tumor suppressor p53-binding protein 1	TP53BP1	;;;;	5	2	2	2	2	2	2	2	2	2	2	2	2	1.4	1.4	1.4	209.02	1927	1927;1972;1975;1977;1033	1	30	0	3.9121	1.4	1.4	1.4	1483200000	113390000	144020000	146680000	0	1	1	9
A6PVN5;Q15257-2;Q15257;Q15257-3;B4DZF8;Q15257-4;Q5T949;Q5T948;A6PVN9;Q68CR8;A6PVN6;B7ZBQ0;A6PVN8;A6PVN7;C9IZ76;B7ZBP9;B7ZBP7;B4DDQ6;H0Y6E5	A6PVN5;Q15257-2;Q15257;Q15257-3;B4DZF8;Q15257-4;Q5T949;Q5T948;A6PVN9;Q68CR8	11;11;11;10;9;9;7;7;7;6;5;4;4;3;3;2;2;2;2	11;11;11;10;9;9;7;7;7;6;5;4;4;3;3;2;2;2;2	11;11;11;10;9;9;7;7;7;6;5;4;4;3;3;2;2;2;2	642880000	566250000	673770000	Serine/threonine-protein phosphatase 2A activator	PPP2R4;DKFZp781M17165	;;;;;;;;;	19	11	11	11	8	9	10	8	9	10	8	9	10	39.5	39.5	39.5	37.375	329	329;323;358;294;374;281;250;253;263;104;176;61;129;64;132;41;77;151;218	1	129	0	59.502	26.1	32.5	35.6	7201000000	681470000	562990000	679430000	6	6	9	83
A6PW57;Q99755-2;Q99755-4;Q99755-3;Q99755;O60331-4;O60331;O60331-2;O60331-3;A6PW58;A2A5X0;O14986-3;O14986;O14986-2	A6PW57;Q99755-2;Q99755-4;Q99755-3;Q99755	5;5;5;5;5;2;2;2;2;1;1;1;1;1	2;2;2;2;2;1;1;1;1;1;1;1;1;1	2;2;2;2;2;1;1;1;1;1;1;1;1;1	0	15661000	0	Phosphatidylinositol 4-phosphate 5-kinase type-1 alpha	PIP5K1A	;;;;	14	5	2	2	3	3	0	1	1	0	1	1	0	11.3	4.5	4.5	61.257	550	550;500;522;549;562;640;668;700;707;86;101;502;540;549	1	13	0	8.6571	7.8	7.8	0	163390000	18332000	17596000	0	1	0	0	11
A8MT37;P49840;M0QYV0	A8MT37;P49840;M0QYV0	3;3;2	3;3;2	3;3;2	45979000	38791000	0	Glycogen synthase kinase-3 alpha	GSK3A	;;	3	3	3	3	3	2	1	3	2	1	3	2	1	10	10	10	44.919	401	401;483;167	1	26	0	6.4973	10	7.7	2.2	346110000	51200000	36798000	8148400	1	2	0	7
A8MT72;Q16799-3;Q16799-2;Q16799	A8MT72;Q16799-3;Q16799-2;Q16799	2;2;2;2	2;2;2;2	2;2;2;2	533720000	437240000	0	Reticulon;Reticulon-1	RTN1	;;;	4	2	2	2	2	2	1	2	2	1	2	2	1	8.3	8.3	8.3	21.862	193	193;208;356;776	1	46	0.0029084	2.321	8.3	8.3	4.1	6034600000	565150000	482940000	117640000	2	2	1	28
A8MTY9;E7EWN9;B7Z6B1;O14972;A8MY26;B7Z606	A8MTY9;E7EWN9;B7Z6B1;O14972;A8MY26;B7Z606	3;3;3;3;2;2	3;3;3;3;2;2	3;3;3;3;2;2	30571000	28327000	0	Down syndrome critical region protein 3	DSCR3	;;;;;	6	3	3	3	3	2	2	3	2	2	3	2	2	17.3	17.3	17.3	27.958	249	249;253;270;297;172;220	1	29	0	4.7126	17.3	12.4	12.4	321610000	34049000	27771000	15828000	1	1	1	12
A8MU21;Q9BVK8-2;Q9BVK8	A8MU21;Q9BVK8-2;Q9BVK8	2;2;2	2;2;2	2;2;2	0	0	22816000	Transmembrane protein 147	TMEM147	;;	3	2	2	2	2	1	2	2	1	2	2	1	2	13	13	13	21.141	184	184;175;224	1	19	0	5.5922	13	9.2	13	232240000	26129000	16054000	20293000	1	1	1	6
A8MUA9;A8MU27;P55854;P55854-2	A8MUA9;A8MU27;P55854;P55854-2	2;2;2;2	1;1;1;1	1;1;1;1	0	0	32722000	Small ubiquitin-related modifier 3	SUMO3	;;;	4	2	1	1	2	2	2	1	1	1	1	1	1	15.6	6.7	6.7	15.317	135	135;147;103;141	1	11	0.0040709	2.203	15.6	15.6	15.6	422960000	47645000	57077000	29103000	1	0	0	3
A8MUM1;Q53HC9;C9JVR6;F8WDX0;F8WB12;F8WDS8;C9J0U9;D3YTH5	A8MUM1;Q53HC9;C9JVR6	4;4;2;1;1;1;1;1	4;4;2;1;1;1;1;1	4;4;2;1;1;1;1;1	0	43539000	0	Protein TSSC1	TSSC1	;;	8	4	4	4	2	3	1	2	3	1	2	3	1	19.6	19.6	19.6	46.319	414	414;387;178;58;87;132;155;314	1	22	0	7.9276	7.2	15	3.1	369430000	42065000	49484000	14820000	1	0	0	8
A8MVQ8;O95749;C9J6G3;C9J7M1	A8MVQ8;O95749;C9J6G3;C9J7M1	3;3;2;2	3;3;2;2	3;3;2;2	24507000	34818000	29659000	Geranylgeranyl pyrophosphate synthase	GGPS1	;;;	4	3	3	3	3	2	3	3	2	3	3	2	3	15.9	15.9	15.9	28.423	246	246;300;230;242	1	28	0	6.4637	15.9	11	15.9	341130000	30582000	31485000	30037000	1	1	1	10
A8MVR0;Q9Y6Y0	A8MVR0;Q9Y6Y0	5;5	5;5	5;5	90071000	87675000	63082000	Influenza virus NS1A-binding protein	IVNS1ABP	;	2	5	5	5	5	3	4	5	3	4	5	3	4	18.4	18.4	18.4	46.759	424	424;642	1	47	0	12.385	18.4	9.7	15.8	876970000	115300000	78738000	66102000	2	1	2	24
A8MW61;O43660;O43660-2;H0YA24;D6RA26;H0YAA2;B7Z982	A8MW61;O43660;O43660-2	9;9;8;4;3;1;1	9;9;8;4;3;1;1	9;9;8;4;3;1;1	97448000	101520000	100500000	Pleiotropic regulator 1	PLRG1	;;	7	9	9	9	5	6	9	5	6	9	5	6	9	29.2	29.2	29.2	57.181	514	514;514;505;156;212;106;131	1	78	0	18.74	14	17.5	29.2	1340300000	83634000	109470000	136900000	1	2	1	28
A8MWK3;P19022;C9J8J8;P55283-2;P55283	A8MWK3;P19022	10;10;1;1;1	10;10;1;1;1	10;10;1;1;1	264470000	285660000	288590000	Cadherin-2	CDH2	;	5	10	10	10	8	7	7	8	7	7	8	7	7	23.4	23.4	23.4	97.039	875	875;906;191;842;916	1	91	0	48.592	17	18.9	15.9	3237900000	322780000	371610000	265780000	5	8	3	62
A8MXP9;P43243;D6REM6;D6R991;B3KM87;P43243-2;H0Y8T4;D6R8Z5;D6RAM9;D6RAY2;D6RCM3;D6REK4;D6RBI2;D6RE02;D6RIA2;D6RB45;D6RGW7;D6R9F3;D6RBS2;D6RBK5	A8MXP9;P43243;D6REM6;D6R991	20;20;17;13;9;9;8;3;2;2;2;2;2;2;2;1;1;1;1;1	20;20;17;13;9;9;8;3;2;2;2;2;2;2;2;1;1;1;1;1	20;20;17;13;9;9;8;3;2;2;2;2;2;2;2;1;1;1;1;1	882360000	1010600000	1023500000	Matrin-3	MATR3	;;;	20	20	20	20	16	18	14	16	18	14	16	18	14	32.4	32.4	32.4	99.966	895	895;847;794;433;509;559;334;107;81;86;99;100;109;124;172;47;77;78;87;121	1	287	0	67.895	24.1	30.3	20.6	12120000000	943400000	1224100000	876690000	9	12	10	148
A8MYQ9;J3KQW8;Q9BZG1-4;Q9BZG1;Q9BZG1-2;C9JBG0;E7ES60;C9JY26;V9GY61;K7EJW7;K7EIF2;H7C0Y7;J3QLC6	A8MYQ9;J3KQW8;Q9BZG1-4;Q9BZG1;Q9BZG1-2;C9JBG0;E7ES60;C9JY26	7;7;7;7;6;5;5;4;3;3;3;3;2	7;7;7;7;6;5;5;4;3;3;3;3;2	7;7;7;7;6;5;5;4;3;3;3;3;2	129080000	85207000	83339000	Ras-related protein Rab-34	RAB34	;;;;;;;	13	7	7	7	5	5	5	5	5	5	5	5	5	30.8	30.8	30.8	29.2	260	260;316;237;259;251;210;268;258;48;51;149;171;156	1	73	0	12.116	21.5	21.5	19.2	1164000000	115110000	108730000	97214000	4	2	1	31
A8MZF9;P55039;J3KRL5;J3QR71;J3QRI9;J3QKW7;J3QL90;J3QKV7;J3QLF3	A8MZF9;P55039	7;7;3;3;3;3;2;2;1	7;7;3;3;3;3;2;2;1	7;7;3;3;3;3;2;2;1	131580000	107800000	133220000	Developmentally-regulated GTP-binding protein 2	DRG2	;	9	7	7	7	4	5	5	4	5	5	4	5	5	23.6	23.6	23.6	38.129	343	343;364;113;158;172;244;112;161;90	1	66	0	13.575	12	14.6	14.6	1221300000	105350000	126580000	112440000	2	2	1	18
A9Z1X7;E9PCT1;Q8IYB3-2;Q8IYB3;M0R088;B4DED5;M0R1E7;M0QXG5	A9Z1X7;E9PCT1;Q8IYB3-2;Q8IYB3;M0R088;B4DED5	4;4;4;4;3;2;1;1	4;4;4;4;3;2;1;1	4;4;4;4;3;2;1;1	136670000	164960000	183890000	Serine/arginine repetitive matrix protein 1	SRRM1	;;;;;	8	4	4	4	4	3	4	4	3	4	4	3	4	8.1	8.1	8.1	103.39	913	913;916;902;904;681;318;79;101	1	55	0	20.969	8.1	4.4	8.1	1941700000	134110000	169620000	230510000	1	3	3	33
B0FLL2;O60825;O60825-2;B4DI16;B4DY91;F2Z2I2;Q5W015;Q5VX20;Q16875-3;Q16875-2;Q16875;Q16875-4;H0Y483;Q4VBA9;B7Z5C3;Q66S35;P16118-2;Q5XLC2;Q64EX5;Q16877;P16118	B0FLL2;O60825;O60825-2;B4DI16;B4DY91	7;7;5;4;4;2;2;2;2;2;2;2;1;1;1;1;1;1;1;1;1	7;7;5;4;4;2;2;2;2;2;2;2;1;1;1;1;1;1;1;1;1	7;7;5;4;4;2;2;2;2;2;2;2;1;1;1;1;1;1;1;1;1	0	43014000	0	6-phosphofructo-2-kinase/fructose-2,6-bisphosphatase 2;6-phosphofructo-2-kinase;Fructose-2,6-bisphosphatase	PFKFB2	;;;;	21	7	7	7	3	4	4	3	4	4	3	4	4	16.5	16.5	16.5	54.777	472	472;505;471;264;373;455;513;526;500;514;520;534;143;271;458;462;406;434;435;469;471	1	49	0	4.15	6.6	8.5	9.1	474010000	24837000	43790000	26691000	1	1	1	8
B0QY89;Q9Y262;Q9Y262-2;B0QY90;C9JHP4;C9K0Q7;H7C3A0;H0Y7E6	B0QY89;Q9Y262;Q9Y262-2;B0QY90	21;21;20;16;6;6;4;3	21;21;20;16;6;6;4;3	21;21;20;16;6;6;4;3	1013700000	1172100000	1124600000	Eukaryotic translation initiation factor 3 subunit L	EIF3L	;;;	8	21	21	21	18	18	17	18	18	17	18	18	17	38.2	38.2	38.2	70.901	607	607;564;516;466;150;183;127;109	1	268	0	262.1	33.1	33.3	31.3	14153000000	1233800000	1234100000	1014500000	16	18	14	166
B0QYK0;Q01844-6;Q01844-3;Q01844;Q01844-5;C9JGE3;Q01844-2;H7BY36;Q01844-4	B0QYK0;Q01844-6;Q01844-3;Q01844;Q01844-5;C9JGE3;Q01844-2;H7BY36	6;6;6;6;6;5;5;4;1	6;6;6;6;6;5;5;4;1	6;6;6;6;6;5;5;4;1	314090000	375370000	372250000	RNA-binding protein EWS	EWSR1	;;;;;;;	9	6	6	6	4	4	6	4	4	6	4	4	6	13.6	13.6	13.6	64.929	618	618;600;655;656;661;583;583;308;354	1	99	0	115.2	11.2	11.2	13.6	4443100000	293110000	343890000	401000000	6	7	5	61
B0S8I7;Q14657	B0S8I7;Q14657	1;1	1;1	1;1	0	25201000	0	EKC/KEOPS complex subunit LAGE3	LAGE3	;	2	1	1	1	0	1	0	0	1	0	0	1	0	21.7	21.7	21.7	10.42	106	106;143	1	8	0	3.9332	0	21.7	0	205960000	0	28316000	0	0	2	0	8
B0V3J0;A9C4B9;E7EQB3;Q9BSV6	B0V3J0;A9C4B9;E7EQB3;Q9BSV6	2;2;2;2	2;2;2;2	2;2;2;2	0	0	4517600	tRNA-splicing endonuclease subunit Sen34	TSEN34	;;;	4	2	2	2	1	0	2	1	0	2	1	0	2	11.6	11.6	11.6	26.101	242	242;251;312;310	1	12	0.0040748	2.2076	6.2	0	11.6	63964000	5910800	0	4018000	0	0	1	1
B0YIW2;P02656	B0YIW2;P02656	1;1	1;1	1;1	0	0	25575000	Apolipoprotein C-III	APOC3	;	2	1	1	1	1	1	1	1	1	1	1	1	1	13.7	13.7	13.7	12.815	117	117;99	1	12	0	34.303	13.7	13.7	13.7	288360000	24820000	32924000	22746000	1	1	1	12
B1AH87;P30536	B1AH87;P30536	3;3	3;3	3;3	589960000	694740000	646850000	Translocator protein	TSPO	;	2	3	3	3	2	3	2	2	3	2	2	3	2	36.4	36.4	36.4	11.896	107	107;169	1	42	0	7.3964	15	36.4	29	7899400000	614520000	789600000	411790000	2	3	2	30
B1AHD1;P55769	B1AHD1;P55769	4;4	4;4	4;4	151910000	175520000	180580000	NHP2-like protein 1;NHP2-like protein 1, N-terminally processed	NHP2L1	;	2	4	4	4	3	4	3	3	4	3	3	4	3	32.6	32.6	32.6	14.627	132	132;128	1	47	0	62.514	23.5	32.6	23.5	2093900000	101500000	213670000	116340000	2	2	2	23
B1AJY5;B1AJY7;O75832;B1AJY6;O75832-2	B1AJY5;B1AJY7;O75832	8;8;8;3;3	8;8;8;3;3	8;8;8;3;3	197790000	190130000	180490000	26S proteasome non-ATPase regulatory subunit 10	PSMD10	;;	5	8	8	8	5	6	5	5	6	5	5	6	5	53.5	53.5	53.5	20.217	185	185;193;226;110;151	1	94	0	27.472	35.1	41.6	35.1	2454300000	197100000	211060000	135700000	4	4	2	48
B1AK13;P35914	B1AK13;P35914	1;1	1;1	1;1	0	0	6804000	Hydroxymethylglutaryl-CoA lyase, mitochondrial	HMGCL	;	2	1	1	1	1	1	1	1	1	1	1	1	1	4.7	4.7	4.7	31.735	300	300;325	1	11	0.0031363	2.2709	4.7	4.7	4.7	128100000	9110300	11467000	6051600	1	1	0	8
B1AKD8;Q5TZA2;Q5TZA2-2	B1AKD8;Q5TZA2;Q5TZA2-2	5;5;3	5;5;3	5;5;3	869330000	724060000	693770000	Rootletin	CROCC	;;	3	5	5	5	3	3	3	3	3	3	3	3	3	3.2	3.2	3.2	149.06	1311	1311;2017;1313	1	46	0	6.3587	2	2	2	8478300000	794400000	857880000	651510000	3	1	1	19
B1AKJ5;O43847;O43847-2;G3V1R5;F5H7V1;H0Y5G9	B1AKJ5;O43847;O43847-2;G3V1R5;F5H7V1	32;32;32;30;20;12	32;32;32;30;20;12	32;32;32;30;20;12	1071600000	955930000	965340000	Nardilysin	NRD1	;;;;	6	32	32	32	27	25	19	27	25	19	27	25	19	32.6	32.6	32.6	139.41	1219	1219;1150;1218;1087;747;538	1	369	0	174	27.8	25.7	19.4	12184000000	1109600000	1166000000	780910000	20	13	11	208
B1AKJ6;J3KPA3;Q96SU4-7;Q96SU4-2;Q96SU4;Q96SU4-6;E9PJW9;Q96SU4-5;Q96SU4-4;Q96SU4-3;H0YE19;E9PKX6;H0YCW0;E9PJ80;E9PLH0;E9PNR1	B1AKJ6;J3KPA3;Q96SU4-7;Q96SU4-2;Q96SU4;Q96SU4-6;E9PJW9;Q96SU4-5;Q96SU4-4;Q96SU4-3	8;8;8;8;8;8;7;6;6;6;3;1;1;1;1;1	8;8;8;8;8;8;7;6;6;6;3;1;1;1;1;1	8;8;8;8;8;8;7;6;6;6;3;1;1;1;1;1	148210000	138920000	110530000	Oxysterol-binding protein;Oxysterol-binding protein-related protein 9	OSBPL9	;;;;;;;;;	16	8	8	8	6	8	5	6	8	5	6	8	5	12.1	12.1	12.1	83.785	741	741;754;719;723;736;746;655;558;571;626;196;32;34;41;92;109	1	76	0	18.026	8.1	12.1	6.7	1490400000	139350000	176840000	66114000	4	2	2	31
B1AKV3;Q9NVA1-2;Q9NVA1;B7Z314;B1AKV4;B1AKV2;B1AKV6;Q9NVA1-5;Q9NVA1-4;F8WCR2;B7Z1C6;F5H4C5;B7Z7J8;H7BYA2;Q9NVA1-3	B1AKV3;Q9NVA1-2;Q9NVA1;B7Z314;B1AKV4;B1AKV2;B1AKV6;Q9NVA1-5;Q9NVA1-4	3;3;3;2;2;2;2;2;2;1;1;1;1;1;1	3;3;3;2;2;2;2;2;2;1;1;1;1;1;1	3;3;3;2;2;2;2;2;2;1;1;1;1;1;1	0	17113000	0	Ubiquinol-cytochrome-c reductase complex assembly factor 1	UQCC1	;;;;;;;;	15	3	3	3	3	3	2	3	3	2	3	3	2	12.4	12.4	12.4	28.939	249	249;273;299;200;219;221;243;231;272;124;144;148;162;187;184	1	31	0	4.8078	12.4	12.4	8.4	226240000	15901000	26588000	16784000	1	0	1	6
B1ALK7;B7Z6G2;Q14155-1;Q14155-5;Q14155-6;Q14155-2;Q14155-3;Q14155;E7EUY6;E9PDQ5;B7Z6D9;E7EU80	B1ALK7;B7Z6G2;Q14155-1;Q14155-5;Q14155-6;Q14155-2;Q14155-3;Q14155;E7EUY6;E9PDQ5	9;9;9;9;8;8;8;8;7;6;2;1	9;9;9;9;8;8;8;8;7;6;2;1	9;9;9;9;8;8;8;8;7;6;2;1	96306000	111960000	92426000	Rho guanine nucleotide exchange factor 7	ARHGEF7	;;;;;;;;;	12	9	9	9	5	4	6	5	4	6	5	4	6	15.7	15.7	15.7	79.831	705	705;721;646;731;625;753;782;803;447;547;181;151	1	63	0	16.556	8.2	6.8	10.2	1257200000	93793000	84651000	92964000	3	2	1	27
B1ALM5;Q9P0T7;B1ALM7;B1ALM8;B1ALM4;Q9NQ34-2;Q9NQ34	B1ALM5;Q9P0T7	3;3;1;1;1;1;1	3;3;1;1;1;1;1	3;3;1;1;1;1;1	70123000	71261000	69378000	Transmembrane protein 9	TMEM9	;	7	3	3	3	2	3	2	2	3	2	2	3	2	21	21	21	20.958	186	186;183;138;151;163;124;198	1	28	0	4.6831	10.8	21	10.8	837170000	67018000	97540000	56988000	1	2	0	11
B1AMB1;B1AMB2;Q9BPZ7-5;Q9BPZ7-6;Q9BPZ7-3;Q9BPZ7-2;Q9BPZ7	B1AMB1;B1AMB2;Q9BPZ7-5;Q9BPZ7-6;Q9BPZ7-3;Q9BPZ7-2;Q9BPZ7	1;1;1;1;1;1;1	1;1;1;1;1;1;1	1;1;1;1;1;1;1	4265900	0	0	Target of rapamycin complex 2 subunit MAPKAP1	MAPKAP1	;;;;;;	7	1	1	1	1	0	0	1	0	0	1	0	0	15.1	15.1	15.1	10.36	93	93;132;323;372;475;486;522	1	4	0.0099615	1.6433	15.1	0	0	17661000	4443900	0	0	0	0	0	2
B1AMU3;Q9Y3B2;R4GNH9;R4GMQ7;B1AMU7;B1AMU4	B1AMU3;Q9Y3B2;R4GNH9;R4GMQ7;B1AMU7;B1AMU4	4;4;3;3;3;3	4;4;3;3;3;3	4;4;3;3;3;3	45540000	40106000	53072000	Exosome complex component CSL4	EXOSC1	;;;;;	6	4	4	4	3	4	3	3	4	3	3	4	3	31.2	31.2	31.2	18.816	170	170;195;139;143;165;178	1	45	0	11.451	24.7	31.2	22.9	507820000	43458000	35036000	43702000	1	3	3	23
B1AMW1;P19256-2;P19256-3;P19256;H0YDI1	B1AMW1;P19256-2;P19256-3;P19256	3;3;3;3;1	3;3;3;3;1	3;3;3;3;1	114490000	100830000	126190000	Lymphocyte function-associated antigen 3	CD58	;;;	5	3	3	3	3	3	3	3	3	3	3	3	3	14.6	14.6	14.6	27.018	240	240;237;248;250;131	1	35	0	9.9574	14.6	14.6	14.6	1140600000	127100000	121570000	113790000	2	3	2	27
B1AN89;B4DXR2;O43432-2;B1AN91;B1AN92	B1AN89;B4DXR2;O43432-2	7;5;5;2;2	2;0;0;0;0	2;0;0;0;0	0	0	17352000	Eukaryotic translation initiation factor 4 gamma 3	EIF4G3	;;	5	7	2	2	6	5	6	2	1	2	2	1	2	12.4	4.4	4.4	67.559	630	630;504;515;217;220	1	15	0.00026838	3.5813	11	9.4	11	170220000	34063000	12472000	15433000	0	0	1	3
B1ANH0;Q16774-2;B1ANG9;Q16774;Q16774-3;B1ANH5;B1ANH2;B1ANH6;B1ANH3	B1ANH0;Q16774-2;B1ANG9;Q16774;Q16774-3;B1ANH5;B1ANH2;B1ANH6;B1ANH3	8;8;7;7;7;6;6;5;4	8;8;7;7;7;6;6;5;4	8;8;7;7;7;6;6;5;4	288010000	276750000	370590000	Guanylate kinase	GUK1	;;;;;;;;	9	8	8	8	8	7	7	8	7	7	8	7	7	53.9	53.9	53.9	23.711	217	217;218;218;197;241;199;253;242;272	1	113	0	21.786	53.9	47.9	49.8	4216400000	405930000	360810000	264720000	6	4	4	52
B1AVQ5;P15941-4;P15941-3;P15941;P15941-2;P15941-7;P15941-17;P15941-11;P15941-8;B1AVQ7;P15941-15;P15941-6;P15941-12;P15941-16;P15941-9;P15941-13;P15941-10;V9GZ38;P15941-5	B1AVQ5;P15941-4;P15941-3;P15941;P15941-2;P15941-7;P15941-17;P15941-11;P15941-8;B1AVQ7;P15941-15;P15941-6	7;7;7;7;7;6;6;6;6;5;4;4;3;3;3;3;3;1;1	7;7;7;7;7;6;6;6;6;5;4;4;3;3;3;3;3;1;1	7;7;7;7;7;6;6;6;6;5;4;4;3;3;3;3;3;1;1	815000000	802840000	774740000	Mucin-1;Mucin-1 subunit alpha;Mucin-1 subunit beta	MUC1	;;;;;;;;;;;	19	7	7	7	7	7	7	7	7	7	7	7	7	20.2	20.2	20.2	49.224	475	475;1243;1252;1255;1264;255;259;264;273;229;224;230;159;166;168;198;203;251;1087	1	135	0	87.764	20.2	20.2	20.2	9829900000	838540000	872610000	723610000	5	6	7	80
B1P7G3;B4DNC9;F5H5N2;B3KQ30;Q9H1K1-2;Q9H1K1	B1P7G3;B4DNC9;F5H5N2;B3KQ30;Q9H1K1-2;Q9H1K1	2;2;1;1;1;1	2;2;1;1;1;1	2;2;1;1;1;1	0	0	18720000	Iron-sulfur cluster assembly enzyme ISCU, mitochondrial	ISCU	;;;;;	6	2	2	2	1	0	1	1	0	1	1	0	1	20.2	20.2	20.2	13.819	129	129;154;154;156;142;167	1	8	0.0012594	2.7444	13.2	0	13.2	234770000	24281000	0	16650000	1	0	1	5
B2WTI3;B2WTI4;K7EJU9;Q6NYC1-2;Q6NYC1;Q6NYC1-3	B2WTI3;B2WTI4;K7EJU9;Q6NYC1-2;Q6NYC1;Q6NYC1-3	6;6;6;6;6;6	6;6;6;6;6;6	6;6;6;6;6;6	96886000	78671000	91302000	Bifunctional arginine demethylase and lysyl-hydroxylase JMJD6	JMJD6	;;;;;	6	6	6	6	5	4	3	5	4	3	5	4	3	26	26	26	39.241	335	335;361;395;372;403;414	1	56	0	35.167	21.8	18.8	15.8	994920000	96327000	85548000	72161000	2	1	4	43
B3KMG4;Q9HCJ1	B3KMG4;Q9HCJ1	2;2	2;2	2;2	13831000	0	0	Progressive ankylosis protein homolog	ANKH	;	2	2	2	2	2	0	0	2	0	0	2	0	0	7.1	7.1	7.1	32.259	294	294;492	1	15	0.00026076	3.2138	7.1	0	0	80437000	14129000	0	0	2	0	0	10
B3KPJ4;Q8IXK0-2;Q8IXK0-4;Q8IXK0;Q8IXK0-5;C9J3D2;Q8IXK0-3;H7C528;Q8NDX5-2;Q8NDX5;Q8NDX5-7	B3KPJ4;Q8IXK0-2;Q8IXK0-4;Q8IXK0;Q8IXK0-5;C9J3D2;Q8IXK0-3	3;3;3;3;3;2;2;1;1;1;1	3;3;3;3;3;2;2;1;1;1;1	3;3;3;3;3;2;2;1;1;1;1	0	0	20617000	Polyhomeotic-like protein 2	PHC2	;;;;;;	11	3	3	3	2	3	2	2	3	2	2	3	2	7.3	7.3	7.3	50.403	464	464;323;829;858;859;317;267;161;964;983;995	1	18	0.00026788	3.5528	5.2	7.3	5.2	177760000	13287000	22352000	18337000	0	2	0	7
B3KRB7;O14920-4;O14920-2;O14920;E5RGW5;G3V105	B3KRB7;O14920-4;O14920-2;O14920	3;3;3;3;1;1	3;3;3;3;1;1	3;3;3;3;1;1	64004000	0	36757000	Inhibitor of nuclear factor kappa-B kinase subunit beta	IKBKB	;;;	6	3	3	3	3	0	3	3	0	3	3	0	3	6.2	6.2	6.2	60.819	533	533;697;754;756;375;562	1	23	0.00025582	2.9242	6.2	0	6.2	376570000	67056000	0	42955000	2	0	1	8
B3KS98;O15372;E5RJT0;E5RGU4;E5RFW7;E5RFH0;E5RHC7;E5RH59	B3KS98;O15372	15;15;7;4;3;3;2;2	15;15;7;4;3;3;2;2	15;15;7;4;3;3;2;2	743910000	860020000	870510000	Eukaryotic translation initiation factor 3 subunit H	EIF3H	;	8	15	15	15	15	13	14	15	13	14	15	13	14	43.7	43.7	43.7	41.581	366	366;352;244;235;97;170;46;56	1	222	0	76.477	43.7	36.3	39.1	10523000000	908440000	954940000	810030000	11	12	8	104
B3KSH1;O00303;B4DEW9;H0YDT6;E9PQV8	B3KSH1;O00303;B4DEW9	13;13;11;4;1	13;13;11;4;1	13;13;11;4;1	1369900000	1496900000	1309700000	Eukaryotic translation initiation factor 3 subunit F	EIF3F	;;	5	13	13	13	13	11	13	13	11	13	13	11	13	47.6	47.6	47.6	39.146	372	372;357;208;100;124	1	189	0	123.79	47.6	40.3	47.6	16646000000	2309400000	1630100000	1159400000	11	10	8	125
B3KUB4;O43570-2;O43570	B3KUB4;O43570-2;O43570	1;1;1	1;1;1	1;1;1	0	0	19594000	Carbonic anhydrase 12	CA12	;;	3	1	1	1	1	1	1	1	1	1	1	1	1	5.3	5.3	5.3	31.857	283	283;343;354	1	13	0.0051704	1.9898	5.3	5.3	5.3	266470000	24966000	26240000	17427000	0	0	0	3
B3KWN8;Q8WU10;B4DEW4	B3KWN8;Q8WU10;B4DEW4	4;4;2	4;4;2	4;4;2	27703000	28671000	30733000	Pyridine nucleotide-disulfide oxidoreductase domain-containing protein 1	PYROXD1	;;	3	4	4	4	2	2	3	2	2	3	2	2	3	12.8	12.8	12.8	48.338	429	429;500;139	1	27	0	6.0968	5.8	5.8	9.8	289330000	21100000	28357000	30400000	1	1	1	6
B3KY83;P19793;P48443	B3KY83;P19793;P48443	5;5;3	1;1;0	1;1;0	0	0	11812000	Retinoic acid receptor RXR-alpha;Retinoic acid receptor RXR-gamma	RXRA;RXRG	;;	3	5	1	1	4	5	2	0	1	1	0	1	1	17.3	4.7	4.7	41.06	365	365;462;463	1	5	0	3.9994	12.6	17.3	7.4	52465000	0	13897000	10506000	0	1	1	3
B3KY94;O14735-3;O14735;H3BUR9	B3KY94;O14735-3;O14735	4;4;4;1	4;4;4;1	4;4;4;1	136670000	90494000	100170000	CDP-diacylglycerol--inositol 3-phosphatidyltransferase	CDIPT	;;	4	4	4	4	4	4	2	4	4	2	4	4	2	19.8	19.8	19.8	25.946	237	237;168;213;157	1	54	0	8.9376	19.8	19.8	10.1	1665800000	220740000	178830000	100070000	4	4	2	28
B4DDF4;B4DUT8;Q99439;Q99439-2;H3BVI6;K7ES69;H3BQH0;U3KPS3	B4DDF4;B4DUT8;Q99439;Q99439-2;H3BVI6	13;13;13;10;8;6;4;2	13;13;13;10;8;6;4;2	12;12;12;9;8;5;4;2	1147200000	934950000	918220000	Calponin;Calponin-2	CNN2	;;;;	8	13	13	12	12	11	11	12	11	11	11	10	10	59.1	59.1	55.4	32.616	298	298;330;309;270;218;148;154;103	1	164	0	220.56	55.4	49.7	46.3	10700000000	1509300000	1108200000	978140000	11	9	9	103
B4DDM3;Q15036-2;Q15036	B4DDM3;Q15036-2;Q15036	3;3;3	3;3;3	3;3;3	14281000	0	0	Sorting nexin-17	SNX17	;;	3	3	3	3	2	2	0	2	2	0	2	2	0	13.7	13.7	13.7	28.505	256	256;445;470	1	11	0.002929	2.396	10.9	9.4	0	165050000	14754000	90665000	0	1	1	0	3
B4DEX5;F6QUN3;H0Y4B0;O43414-3;O43414-2;O43414;F6UGJ8	B4DEX5;F6QUN3;H0Y4B0;O43414-3;O43414-2;O43414;F6UGJ8	2;2;2;2;2;2;1	2;2;2;2;2;2;1	2;2;2;2;2;2;1	73522000	64235000	49096000	ERI1 exoribonuclease 3	PRNPIP;ERI3	;;;;;;	7	2	2	2	2	2	2	2	2	2	2	2	2	17.5	17.5	17.5	18.185	160	160;176;204;128;222;337;250	1	29	0	8.0075	17.5	17.5	17.5	577180000	82686000	76772000	48279000	1	0	2	16
B4DF47;Q9BUK6-5;Q9BUK6-7;Q9BUK6-3;Q9BUK6-2;Q9BUK6	B4DF47;Q9BUK6-5;Q9BUK6-7;Q9BUK6-3;Q9BUK6-2;Q9BUK6	3;3;3;3;3;3	3;3;3;3;3;3	3;3;3;3;3;3	22893000	28922000	0	Protein misato homolog 1	MSTO1	;;;;;	6	3	3	3	3	3	1	3	3	1	3	3	1	11.1	11.1	11.1	34.737	315	315;391;524;558;569;570	1	25	0	3.8995	11.1	11.1	2.9	226290000	24398000	37050000	2900200	1	1	0	7
B4DFL2;P48735;B4DSZ6;H0YL11	B4DFL2;P48735;B4DSZ6	10;10;6;4	10;10;6;4	10;10;6;4	79007000	96751000	116980000	Isocitrate dehydrogenase [NADP], mitochondrial	IDH2	;;	4	10	10	10	6	5	4	6	5	4	6	5	4	27.8	27.8	27.8	45.179	400	400;452;322;312	1	85	0	14.262	14.2	13.8	11.5	1146100000	84404000	71996000	73625000	3	3	1	31
B4DFM7;Q9BXR0	B4DFM7;Q9BXR0	1;1	1;1	1;1	12997000	0	0	Queuine tRNA-ribosyltransferase	QTRT1	;	2	1	1	1	1	0	0	1	0	0	1	0	0	6.2	6.2	6.2	24.015	225	225;403	1	3	0	20.709	6.2	0	0	39076000	13539000	0	0	0	0	0	0
B4DFQ4;Q8N668	B4DFQ4;Q8N668	2;2	2;2	2;2	38860000	35835000	33855000	COMM domain-containing protein 1	COMMD1	;	2	2	2	2	2	2	2	2	2	2	2	2	2	22	22	22	17.665	159	159;190	1	25	0	4.6413	22	22	22	405790000	39812000	41966000	30839000	1	1	1	12
B4DGL8;O75027;O75027-2;O75027-3;E9PJR8;E9PNQ5	B4DGL8;O75027;O75027-2;O75027-3	5;5;5;4;2;1	5;5;5;4;2;1	5;5;5;4;2;1	51771000	0	39731000	ATP-binding cassette sub-family B member 7, mitochondrial	ABCB7	;;;	6	5	5	5	3	2	3	3	2	3	3	2	3	9	9	9	77.12	702	702;752;753;712;188;171	1	42	0	14.894	4.8	3.1	5.8	618420000	45117000	41756000	33242000	1	1	1	20
B4DGU4;P35222	B4DGU4;P35222	11;11	6;6	6;6	132210000	114810000	111960000	Catenin beta-1	CTNNB1	;	2	11	6	6	10	9	10	5	4	5	5	4	5	17.4	10.3	10.3	84.765	774	774;781	1	91	0	19.219	15.1	14.5	15.1	1492000000	141200000	114940000	84242000	3	1	1	32
B4DGX2;P48426;H7BXS3;S4R320;Q5JUT3	B4DGX2;P48426;H7BXS3	4;4;3;1;1	3;3;2;1;1	3;3;2;1;1	33240000	23172000	0	Phosphatidylinositol 5-phosphate 4-kinase type-2 alpha	PIP4K2A	;;	5	4	3	3	4	4	3	3	3	2	3	3	2	16.4	11.5	11.5	39.802	347	347;406;266;142;215	1	28	0.0024631	2.5108	16.4	16.4	12.1	323470000	38894000	33130000	21879000	1	0	0	8
B4DH53;Q66K74;M0R1M7;M0QXQ9;M0QY41;M0QZ50;M0R1J2	B4DH53;Q66K74	13;13;3;2;2;1;1	13;13;3;2;2;1;1	13;13;3;2;2;1;1	207380000	216460000	198000000	Microtubule-associated protein 1S;MAP1S heavy chain;MAP1S light chain	MAP1S	;	7	13	13	13	11	8	10	11	8	10	11	8	10	16.1	16.1	16.1	109.79	1033	1033;1059;120;185;189;93;188	1	127	0	27.474	14.1	10.4	12	2303100000	235520000	214180000	183290000	4	2	4	27
B4DHD4;P26012	B4DHD4;P26012	3;3	3;3	3;3	28120000	0	0	Integrin beta-8	ITGB8	;	2	3	3	3	3	1	2	3	1	2	3	1	2	7.6	7.6	7.6	71.283	634	634;769	1	21	0	4.2142	7.6	2.7	5.4	274020000	29294000	9521800	19644000	0	0	1	4
B4DHE8;Q96DH6-2;Q96DH6;J3KTC1;J3QKT5;B4DM51;Q96DH6-3;H0YHB7;O43347	B4DHE8;Q96DH6-2;Q96DH6;J3KTC1;J3QKT5;B4DM51;Q96DH6-3	6;6;6;5;3;3;3;1;1	6;6;6;5;3;3;3;1;1	6;6;6;5;3;3;3;1;1	102320000	121060000	121990000	RNA-binding protein Musashi homolog 2	MSI2	;;;;;;	9	6	6	6	5	6	6	5	6	6	5	6	6	23.8	23.8	23.8	34.812	324	324;251;328;140;99;267;151;233;362	1	71	0	19.037	20.7	23.8	23.8	1512000000	104470000	142060000	128800000	1	1	3	18
B4DIR9;Q9NYJ8-2;Q9NYJ8	B4DIR9;Q9NYJ8-2;Q9NYJ8	1;1;1	1;1;1	1;1;1	0	0	5688500	TGF-beta-activated kinase 1 and MAP3K7-binding protein 2	TAB2	;;	3	1	1	1	1	1	1	1	1	1	1	1	1	2.3	2.3	2.3	72.804	661	661;536;693	1	10	0.0071876	1.8717	2.3	2.3	2.3	78725000	6585500	10215000	5059500	1	1	0	5
B4DJP7;P62318;H3BT13	B4DJP7;P62318;H3BT13	4;4;2	4;4;2	4;4;2	1053200000	1020400000	1035600000	Small nuclear ribonucleoprotein Sm D3	SNRPD3	;;	3	4	4	4	4	4	4	4	4	4	4	4	4	50	50	50	13.291	120	120;126;62	1	116	0	133.17	50	50	50	14330000000	1101900000	1179400000	935120000	8	9	7	99
B4DJV2;O75390;H0YIC4;F8VPA1;H0YH82;F8VRI6;F8VPF9;F8VR34;F8VTT8;F8W1S4;F8W4S1;F8VRP1;F8VX68;F8W642;F8VZK9;F8VX07;F8VWQ5;F8VU34;F8W0J2	B4DJV2;O75390	18;18;7;5;5;4;4;4;4;4;4;3;3;2;2;2;2;2;1	18;18;7;5;5;4;4;4;4;4;4;3;3;2;2;2;2;2;1	17;17;7;5;5;4;4;3;3;4;3;3;3;2;2;2;1;1;0	2636600000	2564900000	2365200000	Citrate synthase;Citrate synthase, mitochondrial	CS	;	19	18	18	17	14	14	14	14	14	14	13	13	13	52.5	52.5	50.6	50.431	453	453;466;123;144;190;140;140;146;149;157;178;117;120;66;80;114;132;142;75	1	299	0	114.99	39.3	39.5	36.6	30480000000	2403300000	2954900000	1980900000	15	17	13	188
B4DKB2;P42892-3;P42892-2;P42892-4;P42892;E9PJG1;E9PHZ1	B4DKB2;P42892-3;P42892-2;P42892-4;P42892	24;24;24;24;24;2;1	24;24;24;24;24;2;1	24;24;24;24;24;2;1	1324400000	1350000000	1393400000	Endothelin-converting enzyme 1	ECE1	;;;;	7	24	24	24	22	24	17	22	24	17	22	24	17	40.4	40.4	40.4	83.573	738	738;754;758;767;770;77;134	1	386	0	190.56	37.8	40.4	31.8	16376000000	1228100000	1583000000	1064400000	21	23	16	245
B4DKR0;Q13190-3;Q13190-2;Q13190-4;Q13190;H7C3X5;E9PNU4	B4DKR0;Q13190-3;Q13190-2;Q13190-4;Q13190;H7C3X5;E9PNU4	5;5;5;5;5;4;3	5;5;5;5;5;4;3	5;5;5;5;5;4;3	160650000	152400000	126290000	Syntaxin-5	STX5A;STX5	;;;;;;	7	5	5	5	5	4	4	5	4	4	5	4	4	32	32	32	29.233	259	259;267;301;321;355;158;250	1	62	0	52.377	32	25.9	28.6	1972600000	162500000	167780000	178640000	3	4	4	42
B4DKY1;P49589-2;P49589;P49589-3;A8MVQ3;C9JLN0;E9PRS8;E9PLP0	B4DKY1;P49589-2;P49589;P49589-3;A8MVQ3	16;16;16;16;14;2;2;2	16;16;16;16;14;2;2;2	16;16;16;16;14;2;2;2	303510000	298970000	299740000	Cysteine--tRNA ligase, cytoplasmic	CARS	;;;;	8	16	16	16	11	12	12	11	12	12	11	12	12	25.3	25.3	25.3	84.277	739	739;726;748;831;738;45;76;128	1	161	0	98.106	18.1	19.4	18.1	3625200000	262260000	363590000	294780000	8	8	6	83
B4DL37	B4DL37	13	1	1	0	0	20166000	Aldo-keto reductase family 1 member C3	AKR1C3		1	13	1	1	12	12	13	0	0	1	0	0	1	69.6	7.8	7.8	23.364	204	204	1	9	0	3.9855	61.8	61.8	69.6	377270000	0	0	17936000	0	0	0	2
B4DL54;H0YHI0;P49356-2;P49356	B4DL54;H0YHI0;P49356-2;P49356	2;2;2;2	2;2;2;2	2;2;2;2	0	10404000	0	Protein farnesyltransferase subunit beta	CHURC1-FNTB;FNTB	;;;	4	2	2	2	2	1	0	2	1	0	2	1	0	5.9	5.9	5.9	52.785	471	471;472;391;437	1	12	0.0036066	2.229	5.9	1.9	0	87477000	10437000	11690000	0	1	0	0	7
B4DLR2;Q12884;Q12884-2;H7C4D9	B4DLR2;Q12884	6;6;2;1	6;6;2;1	6;6;2;1	38990000	42796000	0	Prolyl endopeptidase FAP;Antiplasmin-cleaving enzyme FAP, soluble form	FAP	;	4	6	6	6	5	5	1	5	5	1	5	5	1	8.6	8.6	8.6	84.861	735	735;760;239;25	1	49	0	8.0611	6.8	6.8	1.2	510590000	46381000	52827000	10602000	2	1	0	14
B4DMQ3;Q9BW27;J3QL54;J3KT10;B4DPW1;J3QLD4;J3QLH0;J3QLV0;F5H0W7;J3QL91;J3KSH3;J3KRC0	B4DMQ3;Q9BW27;J3QL54;J3KT10;B4DPW1;J3QLD4;J3QLH0	7;7;6;6;5;4;4;3;3;1;1;1	7;7;6;6;5;4;4;3;3;1;1;1	7;7;6;6;5;4;4;3;3;1;1;1	69766000	0	0	Nuclear pore complex protein Nup85	NUP85	;;;;;;	12	7	7	7	5	3	1	5	3	1	5	3	1	15.1	15.1	15.1	69.799	610	610;656;544;611;462;272;302;191;259;114;120;169	1	52	0	11.964	11.3	6.1	2.1	609670000	68574000	36269000	13393000	1	0	0	11
B4DNM9;O15228;Q5TBH8	B4DNM9;O15228;Q5TBH8	5;5;4	5;5;4	5;5;4	48496000	47370000	0	Dihydroxyacetone phosphate acyltransferase	GNPAT	;;	3	5	5	5	4	3	3	4	3	3	4	3	3	14.1	14.1	14.1	69.906	619	619;680;587	1	38	0	4.8405	11.5	8.2	7.6	517700000	53729000	41539000	38394000	1	1	1	8
B4DNW0;Q03154;F8WC59;C9JYZ0;C9JMV9;Q03154-2;Q03154-3;Q03154-4	B4DNW0;Q03154;F8WC59;C9JYZ0;C9JMV9;Q03154-2;Q03154-3;Q03154-4	3;3;2;2;2;2;2;2	3;3;2;2;2;2;2;2	3;3;2;2;2;2;2;2	0	40350000	0	Aminoacylase-1	ACY1;ABHD14A-ACY1	;;;;;;;	8	3	3	3	1	2	2	1	2	2	1	2	2	10.4	10.4	10.4	55.994	498	498;408;201;228;509;336;343;373	1	15	0.00026171	3.2599	4.6	8.6	6.4	626270000	7941500	17896000	22480000	0	1	0	4
B4DQ14;Q9BY44;F8WAE5;B4DF96;Q9BY44-2;H7C5R5;C9IZE1;H7C5Q3;F8WF18;F8WAT3	B4DQ14;Q9BY44;F8WAE5;B4DF96;Q9BY44-2	21;21;20;18;12;9;8;5;1;1	21;21;20;18;12;9;8;5;1;1	21;21;20;18;12;9;8;5;1;1	1101300000	1011700000	832440000	Eukaryotic translation initiation factor 2A;Eukaryotic translation initiation factor 2A, N-terminally processed	EIF2A	;;;;	10	21	21	21	19	18	19	19	18	19	19	18	19	48.9	48.9	48.9	62.288	560	560;585;580;524;371;316;236;158;59;75	1	280	0	51.695	46.6	43.8	48.4	11927000000	1017200000	1042400000	775900000	8	7	5	91
B4DQJ8;P52209;F5H7U0;K7EM49;K7EPF6;K7EMN2;K7ELN9	B4DQJ8;P52209;F5H7U0	25;25;24;10;10;8;8	25;25;24;10;10;8;8	25;25;24;10;10;8;8	9075700000	8748800000	8985000000	6-phosphogluconate dehydrogenase, decarboxylating	PGD	;;	7	25	25	25	25	23	24	25	23	24	25	23	24	66	66	66	51.872	470	470;483;461;205;256;160;224	1	478	0	323.31	66	59.8	64.5	102910000000	10851000000	9651900000	8202400000	30	35	33	367
B4DQV4;O95219;F8W9T3	B4DQV4;O95219	3;3;1	3;3;1	3;3;1	42107000	0	0	Sorting nexin-4	SNX4	;	3	3	3	3	3	2	3	3	2	3	3	2	3	9.5	9.5	9.5	35.61	305	305;450;155	1	24	0.0002656	3.4445	9.5	6.2	9.5	259560000	43865000	23791000	20655000	1	0	2	10
B4DR61;P61619;P61619-3;F8W776;Q8TC24;Q9H9S3-2;Q9H9S3-3;Q9H9S3;H7C1Q9;H7C069;A6NK38;F2Z2C7;A6NIF9;C9JJV4	B4DR61;P61619;P61619-3	9;9;5;4;4;4;4;4;3;3;3;3;3;3	9;9;5;4;4;4;4;4;3;3;3;3;3;3	6;6;5;1;1;1;1;1;0;0;0;0;0;0	1358600000	1142900000	920020000	Protein transport protein Sec61 subunit alpha isoform 1	SEC61A1	;;	14	9	9	6	8	8	6	8	8	6	5	5	4	23.9	23.9	15.4	52.949	482	482;476;357;410;418;437;454;476;94;145;159;162;168;189	1	101	0	100.65	19.7	19.7	13.7	12818000000	1889700000	1487400000	691350000	8	5	4	49
B4DR80;Q9Y6E0-2;Q9Y6E0;H0Y630;Q5JV99;Q5JV98	B4DR80;Q9Y6E0-2;Q9Y6E0;H0Y630	11;11;10;8;5;4	11;11;10;8;5;4	6;6;5;4;3;2	245300000	236890000	199730000	Serine/threonine-protein kinase 24;Serine/threonine-protein kinase 24 36 kDa subunit;Serine/threonine-protein kinase 24 12 kDa subunit	STK24	;;;	6	11	11	6	8	10	8	8	10	8	5	6	5	34	34	23.3	45.835	412	412;431;443;369;142;209	1	95	0	98.442	24.8	30.1	25.2	2515600000	226110000	314250000	187180000	6	7	5	37
B4DRL9;P24386	B4DRL9;P24386	2;2	2;2	2;2	44346000	39021000	0	Rab proteins geranylgeranyltransferase component A 1	CHM	;	2	2	2	2	2	2	1	2	2	1	2	2	1	5.5	5.5	5.5	57.264	505	505;653	1	19	0	8.2788	5.5	5.5	3.8	346530000	43590000	56092000	21508000	2	1	0	7
B4DSJ8;Q5TCW7;O60942-3;O60942-4;O60942-2;O60942	B4DSJ8;Q5TCW7;O60942-3;O60942-4;O60942-2;O60942	3;3;3;3;3;3	3;3;3;3;3;3	3;3;3;3;3;3	25906000	22059000	0	mRNA-capping enzyme;Polynucleotide 5-triphosphatase;mRNA guanylyltransferase	RNGTT	;;;;;	6	3	3	3	3	2	1	3	2	1	3	2	1	8.4	8.4	8.4	59.083	514	514;541;457;541;574;597	1	20	0.00026371	3.364	8.4	6	2.9	169450000	26457000	23042000	8056100	2	1	1	4
B4DT77;P20073-2;P20073	B4DT77;P20073-2;P20073	21;21;21	21;21;21	21;21;21	1716200000	1571800000	1615000000	Annexin;Annexin A7	ANXA7	;;	3	21	21	21	17	16	15	17	16	15	17	16	15	61.6	61.6	61.6	37.805	336	336;466;488	1	288	0	120.67	53.3	50.9	48.2	20189000000	1975700000	1678900000	1313100000	14	16	16	183
B4DTG6;Q8ND56-2;Q8ND56;K7EMZ9;I3L4Q1	B4DTG6;Q8ND56-2;Q8ND56;K7EMZ9	5;5;5;4;1	5;5;5;4;1	5;5;5;4;1	71193000	86791000	82497000	Protein LSM14 homolog A	LSM14A	;;;	5	5	5	5	4	4	5	4	4	5	4	4	5	15.9	15.9	15.9	46.411	422	422;463;463;333;102	1	57	0	11.572	11.6	11.6	15.9	1101300000	71053000	92268000	92192000	0	1	0	14
B4DUX5;P50579;F8VRR3;F8VQZ7;G3XA91;G3V1U3;F8VSC4;F8VZX9;F8VY03	B4DUX5;P50579;F8VRR3;F8VQZ7;G3XA91	12;12;10;10;10;4;2;1;1	12;12;10;10;10;4;2;1;1	12;12;10;10;10;4;2;1;1	420680000	434310000	473020000	Methionine aminopeptidase 2	METAP2	;;;;	9	12	12	12	8	9	8	8	9	8	8	9	8	34.1	34.1	34.1	50.496	455	455;478;442;477;455;328;161;163;178	1	138	0	60.563	26.2	26.2	25.7	5428600000	358080000	485430000	342920000	4	6	7	75
B4DVD8;G3V169;P29466-2;P29466;H0YEC7;P29466-4;P29466-3;E9PQW1;Q5FBZ0;Q5EG05-2;Q5EG05	B4DVD8;G3V169;P29466-2;P29466;H0YEC7;P29466-4;P29466-3	3;3;3;3;2;2;2;1;1;1;1	3;3;3;3;2;2;2;1;1;1;1	3;3;3;3;2;2;2;1;1;1;1	25317000	0	0	Caspase;Caspase-1;Caspase-1 subunit p20;Caspase-1 subunit p10	CASP1	;;;;;;	11	3	3	3	2	2	2	2	2	2	2	2	2	15	15	15	33.009	301	301;367;383;404;236;263;311;95;110;97;197	1	18	0	8.6119	10	10	10	192710000	26321000	23091000	21612000	1	0	0	4
B4DVN3;E7ESC7;Q7L5Y9-3;Q7L5Y9-2;Q7L5Y9;D6RDW4;D6REW7;D6RIB6;B4DQT1;Q7L5Y9-5;Q7L5Y9-4;D6RID6;D6RE80;E7ENL1;D6RA86	B4DVN3;E7ESC7;Q7L5Y9-3;Q7L5Y9-2;Q7L5Y9;D6RDW4;D6REW7;D6RIB6;B4DQT1;Q7L5Y9-5;Q7L5Y9-4;D6RID6;D6RE80;E7ENL1	4;4;4;4;4;3;3;3;3;3;3;2;2;2;1	4;4;4;4;4;3;3;3;3;3;3;2;2;2;1	4;4;4;4;4;3;3;3;3;3;3;2;2;2;1	0	17835000	17331000	Macrophage erythroblast attacher	MAEA	;;;;;;;;;;;;;	15	4	4	4	2	2	2	2	2	2	2	2	2	11.1	11.1	11.1	45.073	395	395;434;355;360;396;245;274;328;348;245;328;115;183;317;107	1	26	0.00076007	2.821	4.3	6.8	5.3	179710000	9402900	18144000	11145000	0	1	0	5
B4DWW1;P40616;F8VYN9;B4DZG7;F8VP99;F8W1Z8;F8VP63	B4DWW1;P40616;F8VYN9;B4DZG7	6;6;5;4;1;1;1	6;6;5;4;1;1;1	6;6;5;4;1;1;1	338540000	299020000	293410000	ADP-ribosylation factor-like protein 1	ARL1	;;;	7	6	6	6	5	5	5	5	5	5	5	5	5	57.9	57.9	57.9	18.565	164	164;181;194;135;17;52;64	1	87	0	28.541	49.4	49.4	49.4	3737700000	454750000	352850000	267830000	7	7	4	65
B4DXZ6;P51114;P51114-2;E9PFF5;P51114-3;E7EU85;C9JZE0;C9JY20;C9JAJ4;C9IZ22;C9J5B4;H7C4S4	B4DXZ6;P51114;P51114-2;E9PFF5;P51114-3;E7EU85	15;15;14;12;12;11;4;4;4;2;1;1	15;15;14;12;12;11;4;4;4;2;1;1	13;13;12;10;10;9;4;4;4;2;1;1	287400000	316550000	313650000	Fragile X mental retardation syndrome-related protein 1	FXR1	;;;;;	12	15	15	13	9	8	10	9	8	10	8	7	8	33.6	33.6	30.9	68.326	608	608;621;539;490;536;454;119;123;151;94;75;246	1	135	0	46.846	20.6	16.4	21.9	3729600000	317210000	287910000	298720000	5	3	6	60
B4DZI8;P35606;D6RBT6;D6R997;D6RBZ7;D6RCL6;D6RBG7;H0Y938;H0YAC7	B4DZI8;P35606	38;38;6;6;5;5;5;3;2	38;38;6;6;5;5;5;3;2	38;38;6;6;5;5;5;3;2	2152400000	1959200000	2011000000	Coatomer subunit beta	COPB2	;	9	38	38	38	32	31	27	32	31	27	32	31	27	57.7	57.7	57.7	99.045	877	877;906;111;152;77;86;89;177;118	1	472	0	205.26	48.9	47.8	41.4	25002000000	2358300000	2218200000	1781700000	28	22	26	286
B4E1D7;Q9NVS9;B4E0V0;B4E152;J3QQV6	B4E1D7;Q9NVS9;B4E0V0;B4E152	6;6;5;5;2	6;6;5;5;2	6;6;5;5;2	107060000	87937000	106170000	Pyridoxine-5-phosphate oxidase	PNPO	;;;	5	6	6	6	5	5	5	5	5	5	5	5	5	35.4	35.4	35.4	27.822	243	243;261;166;218;120	1	70	0	30.081	29.2	29.2	29.2	1218500000	115010000	96262000	90337000	3	3	2	35
B4E1G1;Q9BUN8-2;Q9BUN8;E5RGY0	B4E1G1;Q9BUN8-2;Q9BUN8	3;3;3;1	3;3;3;1	3;3;3;1	82374000	64083000	75031000	Derlin-1	DERL1	;;	4	3	3	3	2	3	2	2	3	2	2	3	2	21.9	21.9	21.9	17.033	151	151;231;251;151	1	39	0	15.694	12.6	21.9	12.6	879660000	71592000	80561000	52547000	2	2	0	16
B4E1J0;F5H2F6;Q96AQ6-2;Q96AQ6;Q96AQ6-3;Q5T173	B4E1J0;F5H2F6;Q96AQ6-2;Q96AQ6;Q96AQ6-3	14;14;14;14;10;2	14;14;14;14;10;2	14;14;14;14;10;2	320080000	318850000	356050000	Pre-B-cell leukemia transcription factor-interacting protein 1	PBXIP1	;;;;	6	14	14	14	9	11	13	9	11	13	9	11	13	32.8	32.8	32.8	62.667	558	558;576;702;731;662;315	1	147	0	55.804	21.7	26.7	30.8	3745700000	256710000	350720000	311160000	6	5	5	57
B4E241;P84103	B4E241;P84103	7;7	6;6	6;6	583750000	456830000	407460000	Serine/arginine-rich splicing factor 3	SRSF3	;	2	7	6	6	6	6	6	5	5	5	5	5	5	46.8	46.8	46.8	14.203	124	124;164	1	60	0	11.357	37.1	37.1	37.1	6350400000	589800000	546430000	385190000	4	3	3	34
B4E2S7;P13473-2;P13473;P13473-3;B7Z2R9;H0YCG2	B4E2S7;P13473-2;P13473;P13473-3;B7Z2R9;H0YCG2	6;6;5;5;4;3	6;6;5;5;4;3	6;6;5;5;4;3	305220000	271360000	323850000	Lysosome-associated membrane glycoprotein 2	LAMP2	;;;;;	6	6	6	6	6	6	5	6	6	5	6	6	5	14.6	14.6	14.6	39.811	363	363;410;410;411;300;258	1	95	0	38.212	14.6	14.6	12.4	5227800000	384200000	342410000	267570000	4	4	4	57
B4E2V5;P27105;P27105-2	B4E2V5;P27105	10;10;3	10;10;3	10;10;3	992000000	1108100000	1109500000	Erythrocyte band 7 integral membrane protein	STOM	;	3	10	10	10	7	8	8	7	8	8	7	8	8	60.3	60.3	60.3	25.964	237	237;288;123	1	159	0	147.12	45.6	48.5	48.5	14013000000	937840000	1381900000	941430000	10	10	8	97
B4E2X3;Q8N6R0-3;Q8N6R0;Q8N6R0-4;Q8N6R0-1;Q8N6R0-2	B4E2X3;Q8N6R0-3;Q8N6R0;Q8N6R0-4;Q8N6R0-1;Q8N6R0-2	6;6;6;5;4;3	6;6;6;5;4;3	6;6;6;5;4;3	67387000	46816000	46147000	Methyltransferase-like protein 13	METTL13	;;;;;	6	6	6	6	3	4	3	3	4	3	3	4	3	11.7	11.7	11.7	78.687	698	698;613;699;642;543;396	1	49	0	20.43	5.3	6.7	7.4	643890000	65560000	46112000	34713000	0	0	1	9
B4E321;Q13438-8;Q13438-6;Q13438-5;Q13438-3;Q13438-2;Q13438-7;Q13438-4;Q13438	B4E321;Q13438-8;Q13438-6;Q13438-5;Q13438-3;Q13438-2;Q13438-7;Q13438-4;Q13438	1;1;1;1;1;1;1;1;1	1;1;1;1;1;1;1;1;1	1;1;1;1;1;1;1;1;1	0	15160000	0	Protein OS-9	OS9	;;;;;;;;	9	1	1	1	1	1	0	1	1	0	1	1	0	3.9	3.9	3.9	46.301	406	406;538;560;580;597;612;613;652;667	1	6	0.00026185	3.2622	3.9	3.9	0	64435000	13936000	17034000	0	1	0	0	3
B5MC22;H7C417;Q9UDX5	B5MC22;H7C417;Q9UDX5	1;1;1	1;1;1	1;1;1	0	11555000	0	Mitochondrial fission process protein 1	MTFP1	;;	3	1	1	1	1	1	0	1	1	0	1	1	0	7.7	7.7	7.7	15.556	143	143;338;166	1	7	0.001761	2.7262	7.7	7.7	0	56626000	6467400	12983000	0	0	0	0	2
B5MCF9;O00541-2;O00541;B3KXD6;H7C267	B5MCF9;O00541-2;O00541;B3KXD6	7;7;7;5;1	7;7;7;5;1	7;7;7;5;1	90846000	132390000	155530000	Pescadillo homolog	PES1	;;;	5	7	7	7	5	3	5	5	3	5	5	3	5	13.7	13.7	13.7	66.077	571	571;583;588;449;194	1	62	0	6.4954	9.6	6.5	9.6	1621800000	89788000	66874000	143360000	0	1	1	15
B5MCL5;G5E975;Q12824-2;Q12824;C9JTA6	B5MCL5;G5E975;Q12824-2;Q12824;C9JTA6	2;2;2;2;1	2;2;2;2;1	2;2;2;2;1	0	0	24663000	SWI/SNF-related matrix-associated actin-dependent regulator of chromatin subfamily B member 1	SMARCB1	;;;;	5	2	2	2	1	2	2	1	2	2	1	2	2	7.7	7.7	7.7	38.77	339	339;394;376;385;227	1	15	0.0031378	2.2762	5	7.7	7.7	179670000	9164000	27007000	21936000	0	0	0	2
B5MCZ3;P05231;B5MC21;B5MC14;B4DNQ5;B4DNV3;C9J5B0	B5MCZ3;P05231;B5MC21;B5MC14;B4DNQ5;B4DNV3;C9J5B0	7;7;6;5;5;4;4	7;7;6;5;5;4;4	7;7;6;5;5;4;4	83754000	107400000	69746000	Interleukin-6	IL6	;;;;;;	7	7	7	7	6	4	5	6	4	5	6	4	5	42.9	42.9	42.9	21.494	189	189;212;136;198;252;122;152	1	55	0	15.28	38.6	24.9	30.2	904500000	136100000	102970000	84315000	5	2	1	16
B5MD17;J3KS05;P83916;K7ELA4;C9JWS9	B5MD17;J3KS05;P83916;K7ELA4;C9JWS9	4;4;4;3;2	3;3;3;2;2	3;3;3;2;2	0	0	32282000	Chromobox protein homolog 1	CBX1	;;;;	5	4	3	3	2	3	3	1	2	2	1	2	2	37.5	28	28	19.325	168	168;173;185;138;110	1	21	0	4.3543	16.1	33.3	20.2	380960000	31110000	48006000	24894000	1	2	1	12
B5MDU6;Q9H6V9;Q9H6V9-2;C9JHU6;B5MCU4;Q9H6V9-4;Q9H6V9-3;C9JUM0;B5MCE2;B4DRG3	B5MDU6;Q9H6V9;Q9H6V9-2;C9JHU6;B5MCU4;Q9H6V9-4;Q9H6V9-3;C9JUM0	4;4;4;3;3;3;3;2;1;1	4;4;4;3;3;3;3;2;1;1	4;4;4;3;3;3;3;2;1;1	208650000	299840000	284750000	UPF0554 protein C2orf43	LDAH;C2orf43	;;;;;;;	10	4	4	4	3	2	3	3	2	3	3	2	3	18.9	18.9	18.9	42.668	370	370;325;331;130;240;195;277;159;146;166	1	36	0	6.7168	16.8	13	16.8	3288100000	162480000	611870000	350040000	1	1	1	13
B7WPF4;Q9UPU5	B7WPF4;Q9UPU5	16;16	16;16	16;16	76515000	71883000	92315000	Ubiquitin carboxyl-terminal hydrolase 24	USP24	;	2	16	16	16	11	10	7	11	10	7	11	10	7	8	8	8	277.41	2460	2460;2620	1	108	0	21.834	5.4	4.6	3.2	1046500000	170860000	83779000	60646000	1	4	3	43
B7WPG3;D6W592;Q8WVV9-5;Q8WVV9-4;Q8WVV9;H7C464;C9IYN3;Q8WVV9-3;Q8WVV9-2;H7BXH8;C9JJZ7	B7WPG3;D6W592;Q8WVV9-5;Q8WVV9-4;Q8WVV9	9;9;9;9;9;3;3;3;3;2;1	9;9;9;9;9;3;3;3;3;2;1	9;9;9;9;9;3;3;3;3;2;1	136060000	136010000	141420000	Heterogeneous nuclear ribonucleoprotein L-like	HNRNPLL;HNRPLL	;;;;	11	9	9	9	5	7	7	5	7	7	5	7	7	23.4	23.4	23.4	56.45	508	508;542;508;537;542;133;282;275;282;217;149	1	77	0	22.346	12.4	18.7	17.7	1615000000	94625000	189630000	144200000	0	4	2	24
B7Z1C4;P40123;B7Z385;E9PDI2;B7Z214;F8WEW0;F8WDB9	B7Z1C4;P40123;B7Z385;E9PDI2	10;10;8;8;3;2;2	9;9;7;7;2;2;2	9;9;7;7;2;2;2	158870000	136130000	152910000	Adenylyl cyclase-associated protein 2;Adenylyl cyclase-associated protein	CAP2	;;;	7	10	9	9	7	8	6	6	7	5	6	7	5	34.9	32.9	32.9	45.245	413	413;477;365;451;217;104;194	1	80	0	21.159	25.9	28.6	20.1	1708300000	152240000	158800000	87289000	2	4	2	24
B7Z2C3;P49593;B5MCT7;A8MX49;C9J2F3;C9JL74	B7Z2C3;P49593;B5MCT7;A8MX49	5;5;4;4;2;1	5;5;4;4;2;1	5;5;4;4;2;1	0	48773000	0	Protein phosphatase 1F	PPM1F	;;;	6	5	5	5	3	4	3	3	4	3	3	4	3	19.1	19.1	19.1	38.518	350	350;454;286;361;89;82	1	34	0	5.8897	10	13.7	12.6	400610000	39674000	51696000	23381000	0	2	0	3
B7Z2S5;Q16881-4;Q16881-3;Q16881;B2R5P6;E2QRB9;E9PNQ6;E7ESI6;E7EW10;Q16881-5;Q16881-2;Q16881-6;E9PIR7;Q16881-7;E9PKD3;E9PIZ5;E9PLT3;E9PKI4;E9PQI3;E9PRI8;E9PJU2	B7Z2S5;Q16881-4;Q16881-3;Q16881;B2R5P6;E2QRB9;E9PNQ6;E7ESI6;E7EW10;Q16881-5;Q16881-2;Q16881-6;E9PIR7;Q16881-7	32;32;32;32;30;30;30;30;30;30;30;30;28;25;14;8;6;6;5;2;1	32;32;32;32;30;30;30;30;30;30;30;30;28;25;14;8;6;6;5;2;1	31;31;31;31;29;29;29;29;29;29;29;29;27;24;13;7;5;5;5;2;1	7024100000	6682200000	7095100000	Thioredoxin reductase 1, cytoplasmic	TXNRD1	;;;;;;;;;;;;;	21	32	32	31	28	29	32	28	29	32	27	28	31	67.8	67.8	65.1	60.021	547	547;551;598;649;497;541;568;581;612;499;543;614;482;461;175;139;70;72;53;44;96	1	590	0	323.31	65.1	66.4	67.8	82292000000	7385200000	7739900000	6118600000	41	46	50	494
B7Z2X9;P09104;F5H0C8;F5H1C3;U3KQP4	B7Z2X9;P09104;F5H0C8	9;9;6;2;1	5;5;3;1;1	5;5;3;1;1	389020000	438770000	424290000	Gamma-enolase;Enolase	ENO2	;;	5	9	5	5	5	7	6	2	4	2	2	4	2	33	16.9	16.9	42.707	391	391;434;315;103;73	1	38	0	17.002	18.9	27.6	21.2	4505000000	40366000	86954000	32053000	1	3	1	16
B7Z358;Q8N5N7	B7Z358;Q8N5N7	4;4	4;4	4;4	63047000	73041000	62780000	39S ribosomal protein L50, mitochondrial	MRPL50	;	2	4	4	4	3	3	3	3	3	3	3	3	3	46.7	46.7	46.7	15.524	135	135;158	1	45	0	24.103	37	37	32.6	812660000	78651000	98026000	53512000	4	1	1	28
B7Z3K1;D3DVS1	B7Z3K1;D3DVS1	1;1	1;1	1;1	0	0	9332200		TMEM128	;	2	1	1	1	0	0	1	0	0	1	0	0	1	9.8	9.8	9.8	14.946	132	132;165	1	3	0.0080813	1.8191	0	0	9.8	22217000	0	0	8300200	0	0	0	1
B7Z3Z9;E7EPM6;P33121-2;P33121-3;P33121;H0Y9U7;D6RER0	B7Z3Z9;E7EPM6;P33121-2;P33121-3;P33121;H0Y9U7;D6RER0	2;2;2;2;2;1;1	2;2;2;2;2;1;1	2;2;2;2;2;1;1	10280000	0	0	Long-chain-fatty-acid--CoA ligase 1	ACSL1	;;;;;;	7	2	2	2	2	0	1	2	0	1	2	0	1	5.1	5.1	5.1	58.586	527	527;664;688;698;698;294;388	1	13	0.0040447	2.1171	5.1	0	3.4	115350000	10709000	0	3806900	1	0	0	3
B7Z468;B7Z574;P20810-4;P20810-8;P20810;E9PCH5;P20810-2;E7ES10;E9PDE4;P20810-3;H0Y7F0;E7EQ12;E7EQA0;H0Y944;D6RBR1;D6RGF7;E7EN75;D6RAA8;D6RC54;E7EQK6	B7Z468;B7Z574;P20810-4;P20810-8;P20810;E9PCH5;P20810-2;E7ES10;E9PDE4;P20810-3;H0Y7F0;E7EQ12;E7EQA0	40;33;33;33;33;32;32;30;29;29;26;23;22;11;9;8;7;4;4;3	40;33;33;33;33;32;32;30;29;29;26;23;22;11;9;8;7;4;4;3	1;0;0;0;0;0;0;0;0;0;0;0;0;0;1;1;1;0;0;0	4843900000	5612200000	5442600000	Calpastatin	CAST	;;;;;;;;;;;;	20	40	40	1	33	39	37	33	39	37	1	1	1	61.8	61.8	1.1	80.998	754	754;694;667;686;708;673;695;642;636;590;436;423;431;288;150;149;156;78;91;156	1	716	0	323.31	58.4	61.3	60.2	65149000000	4982100000	6125000000	4805300000	33	39	38	455
B7Z4B8;Q9BUJ2-4;Q9BUJ2-2;Q9BUJ2;M0R3F1;Q9BUJ2-3;M0QYZ0;M0R0K8;M0R203;M0QZV6;M0QYI8;Q9BUJ2-5;M0QYM5	B7Z4B8;Q9BUJ2-4;Q9BUJ2-2;Q9BUJ2;M0R3F1;Q9BUJ2-3;M0QYZ0	27;27;27;27;23;23;16;5;4;4;4;4;1	27;27;27;27;23;23;16;5;4;4;4;4;1	27;27;27;27;23;23;16;5;4;4;4;4;1	1241900000	1292500000	1345500000	Heterogeneous nuclear ribonucleoprotein U-like protein 1	HNRNPUL1	;;;;;;	13	27	27	27	20	23	23	20	23	23	20	23	23	45.1	45.1	45.1	86.121	767	767;756;804;856;641;752;371;158;81;118;172;390;90	1	329	0	104.4	31.3	40.8	35.7	16089000000	1183800000	1399700000	1103200000	18	21	16	240
B7Z4K6;O00115;K7ENE5	B7Z4K6;O00115;K7ENE5	3;3;2	3;3;2	3;3;2	47924000	42834000	49402000	Deoxyribonuclease-2-alpha	DNASE2	;;	3	3	3	3	3	2	2	3	2	2	3	2	2	10.8	10.8	10.8	33.615	305	305;360;218	1	30	0	6.279	10.8	6.9	6.9	553170000	62338000	40425000	37649000	2	1	1	9
B7Z588;O14763-2;O14763	B7Z588;O14763-2;O14763	2;2;2	2;2;2	2;2;2	0	19177000	0	Tumor necrosis factor receptor superfamily member 10B	TNFRSF10B	;;	3	2	2	2	0	2	0	0	2	0	0	2	0	12.3	12.3	12.3	28.674	260	260;411;440	1	16	0	7.191	0	12.3	0	125830000	0	20412000	0	0	1	0	8
B7Z5N5;Q15796-2;Q15796;K7EJX0;K7ESI8;K7EL92;K7ERC7;H3BVD1;P84022-3;P84022-2;P84022;O15198-2;O15198;H0YMP2;H0YNV1;H0YL71;H0YKE2;H3BP09;H0YAK7;F5GWU7;P84022-4;Q99717;Q15797	B7Z5N5;Q15796-2;Q15796;K7EJX0	5;5;5;4;2;2;2;2;2;2;2;2;2;1;1;1;1;1;1;1;1;1;1	5;5;5;4;2;2;2;2;2;2;2;2;2;1;1;1;1;1;1;1;1;1;1	5;5;5;4;2;2;2;2;2;2;2;2;2;1;1;1;1;1;1;1;1;1;1	173920000	140340000	107200000	Mothers against decapentaplegic homolog;Mothers against decapentaplegic homolog 2	SMAD2	;;;	23	5	5	5	4	4	4	4	4	4	4	4	4	13.5	13.5	13.5	48.669	431	431;437;467;217;108;109;137;213;320;381;425;430;467;63;84;92;112;114;174;464;230;465;465	1	60	0	10.457	10.7	10.7	11.1	1464100000	149130000	133990000	90668000	3	2	1	20
B7Z6B8;Q16698;E5RFV2;E5RJG7;E5RJD2;E5RID6;H0YAW3	B7Z6B8;Q16698;E5RFV2	12;12;6;5;3;2;1	12;12;6;5;3;2;1	12;12;6;5;3;2;1	548130000	596800000	502550000	2,4-dienoyl-CoA reductase, mitochondrial	DECR1	;;	7	12	12	12	8	8	7	8	8	7	8	8	7	44.2	44.2	44.2	34.994	326	326;335;205;181;151;95;43	1	132	0	80.485	27.6	29.8	24.5	6659500000	515680000	635100000	422580000	4	9	6	93
B7Z6Q6;Q99661;Q5JR91;B7Z7M6;Q99661-2;Q5JR89	B7Z6Q6;Q99661;Q5JR91;B7Z7M6;Q99661-2	4;4;3;3;3;1	4;4;3;3;3;1	4;4;3;3;3;1	41072000	63549000	0	Kinesin-like protein;Kinesin-like protein KIF2C	KIF2C	;;;;	6	4	4	4	3	3	2	3	3	2	3	3	2	5.7	5.7	5.7	76.982	684	684;725;336;612;671;287	1	32	0	5.1382	4.5	4.5	2.6	470110000	42015000	62223000	28378000	1	2	0	5
B7Z7A3;Q9BZE4;B4DY13;Q5T3R7	B7Z7A3;Q9BZE4;B4DY13;Q5T3R7	8;8;5;4	8;8;5;4	8;8;5;4	67221000	75637000	72302000	Nucleolar GTP-binding protein 1	GTPBP4	;;;	4	8	8	8	3	5	5	3	5	5	3	5	5	15	15	15	68.272	587	587;634;518;140	1	68	0	11.531	6.1	10.2	9.5	810470000	29164000	63101000	51108000	1	2	2	21
B7Z7F3;Q9H6Z4-3;Q9H6Z4-2;Q9H6Z4;F5H4C2;K7EIJ4;K7EJV3;K7ENJ2;K7EID7;K7ENB9;K7EPW1;K7ESQ0;K7EN31	B7Z7F3;Q9H6Z4-3;Q9H6Z4-2;Q9H6Z4;F5H4C2;K7EIJ4	9;9;9;9;8;5;2;1;1;1;1;1;1	9;9;9;9;8;5;2;1;1;1;1;1;1	9;9;9;9;8;5;2;1;1;1;1;1;1	141580000	153490000	121820000	Ran-binding protein 3	RANBP3	;;;;;	13	9	9	9	8	6	6	8	6	6	8	6	6	23.9	23.9	23.9	52.894	494	494;499;562;567;439;155;174;62;73;74;108;122;171	1	79	0	20.661	19.8	14.2	16.2	1537500000	144490000	144800000	103500000	6	4	3	43
B7Z7N2;F5H1E5;B7Z2Y2;Q14746-2;Q14746	B7Z7N2;F5H1E5;B7Z2Y2;Q14746-2;Q14746	2;2;2;2;2	2;2;2;2;2	2;2;2;2;2	26009000	29402000	0	Conserved oligomeric Golgi complex subunit 2	COG2	;;;;	5	2	2	2	2	2	1	2	2	1	2	2	1	10.1	10.1	10.1	48.1	427	427;622;679;737;738	1	11	0.0069638	1.8901	10.1	10.1	4.2	144520000	25160000	34297000	12038000	1	2	0	4
B7Z817;Q15392;F5H0H1;H7C4B7	B7Z817;Q15392;F5H0H1	16;16;10;7	16;16;10;7	16;16;10;7	877170000	781800000	805260000	Delta(24)-sterol reductase	DHCR24	;;	4	16	16	16	11	13	12	11	13	12	11	13	12	35.4	35.4	35.4	54.75	475	475;516;300;154	1	173	0	48.278	24	27.8	25.5	9005700000	838480000	954150000	875180000	8	10	8	80
B7Z8Z7;A0AV96-2;A0AV96	B7Z8Z7;A0AV96-2;A0AV96	1;1;1	1;1;1	1;1;1	0	0	11990000	RNA-binding protein 47	RBM47	;;	3	1	1	1	0	1	1	0	1	1	0	1	1	2.5	2.5	2.5	60.567	555	555;524;593	1	8	0.0033719	2.2501	0	2.5	2.5	63191000	0	9883800	10664000	0	1	0	3
B7Z934;Q9HAK2	B7Z934;Q9HAK2	1;1	1;1	1;1	0	0	377020000	Transcription factor COE2	EBF2	;	2	1	1	1	1	1	1	1	1	1	1	1	1	2.6	2.6	2.6	45.967	427	427;575	1	51	0.00050865	2.8788	2.6	2.6	2.6	6563400000	516900000	753790000	537420000	4	3	2	30
B7Z964;H7C3M8;H7BZK0;Q14BN4-5;Q14BN4-4;Q14BN4-2;Q14BN4-3;Q14BN4;C9JA20;C9JPE6;H7BZW9;B7Z863;Q14BN4-8	B7Z964;H7C3M8;H7BZK0;Q14BN4-5;Q14BN4-4;Q14BN4-2;Q14BN4-3;Q14BN4;C9JA20;C9JPE6;H7BZW9;B7Z863;Q14BN4-8	2;2;2;2;2;2;2;2;1;1;1;1;1	2;2;2;2;2;2;2;2;1;1;1;1;1	2;2;2;2;2;2;2;2;1;1;1;1;1	0	0	47452000	Sarcolemmal membrane-associated protein	SLMAP	;;;;;;;;;;;;	13	2	2	2	1	0	2	1	0	2	1	0	2	5.8	5.8	5.8	42.036	362	362;409;433;359;452;790;811;828;101;296;316;318;271	1	11	0.0010104	2.7796	3	0	5.8	119990000	11444000	0	42204000	1	0	0	3
B7Z9I3;O75787;H0Y750;B7Z1I9;B7Z413;H7C3E1;H7C240	B7Z9I3;O75787;H0Y750;B7Z1I9;B7Z413;H7C3E1	6;6;5;5;5;4;2	6;6;5;5;5;4;2	6;6;5;5;5;4;2	97612000	87689000	90559000	Renin receptor	ATP6AP2	;;;;;	7	6	6	6	4	6	6	4	6	6	4	6	6	27.4	27.4	27.4	35.612	318	318;350;243;272;274;259;203	1	56	0	30.1	18.6	27.4	27.4	1113400000	102850000	137330000	102560000	2	4	4	35
B7Z9S8;A6NGH2;P05026-2;P05026;V9GYR2	B7Z9S8;A6NGH2;P05026-2;P05026;V9GYR2	8;8;8;8;5	8;8;8;8;5	8;8;8;8;5	381110000	388570000	442780000	Sodium/potassium-transporting ATPase subunit beta-1	ATP1B1	;;;;	5	8	8	8	7	7	6	7	7	6	7	7	6	39.3	39.3	39.3	28.627	247	247;295;301;303;130	1	109	0	32.56	38.5	36.4	24.7	4526400000	403920000	440580000	368250000	8	7	6	79
B7ZAZ9;Q14142-3;Q14142	B7ZAZ9;Q14142-3;Q14142	1;1;1	1;1;1	1;1;1	0	5049400	0	Tripartite motif-containing protein 14	TRIM14	;;	3	1	1	1	1	1	0	1	1	0	1	1	0	4.5	4.5	4.5	24.84	223	223;406;442	1	7	0.0097772	1.6748	4.5	4.5	0	44363000	5628400	5673400	0	0	0	0	1
B7ZC38;Q9NR46;Q9NR46-2;B7ZC39;F8WFB9;G5E9J1;H7C1Z6	B7ZC38;Q9NR46;Q9NR46-2;B7ZC39	14;14;14;13;5;1;1	14;14;14;13;5;1;1	13;13;13;12;4;1;1	495200000	466220000	427520000	Endophilin-B2	SH3GLB2	;;;	7	14	14	13	12	11	11	12	11	11	11	10	10	44.2	44.2	42.2	44.361	400	400;395;404;374;127;24;59	1	171	0	84.065	34.5	31.8	33	5392600000	505150000	519200000	377290000	7	5	8	70
B7ZKQ9;Q8WTV0-4;Q8WTV0-2;Q8WTV0-3;F5H4X0;B3KW46;B4DZ71;Q8WTV0-5;Q8WTV0;F5H5E8	B7ZKQ9;Q8WTV0-4;Q8WTV0-2;Q8WTV0-3;F5H4X0;B3KW46;B4DZ71;Q8WTV0-5;Q8WTV0	10;10;10;9;8;8;8;8;8;1	10;10;10;9;8;8;8;8;8;1	10;10;10;9;8;8;8;8;8;1	235130000	204700000	216550000	Scavenger receptor class B member 1	SCARB1	;;;;;;;;	10	10	10	10	8	8	8	8	8	8	8	8	8	21.8	21.8	21.8	53.847	481	481;474;509;409;499;512;516;506;552;146	1	100	0	23.679	18.3	17.7	16	2686600000	317870000	232060000	240140000	6	5	1	35
B7ZLZ2;Q9BZQ6;H0Y498	B7ZLZ2;Q9BZQ6	4;4;1	4;4;1	4;4;1	0	1474700000	0	ER degradation-enhancing alpha-mannosidase-like protein 3	EDEM3	;	3	4	4	4	2	3	1	2	3	1	2	3	1	5.5	5.5	5.5	102	905	905;932;380	1	21	0.00026357	3.3588	3.2	4.5	1.3	3534300000	17568000	45026000	16522000	0	1	0	4
B8A4K4;A8MQ03	B8A4K4;A8MQ03	1;1	1;1	1;1	0	0	21586000	Cysteine-rich tail protein 1	CYSRT1	;	2	1	1	1	1	1	1	1	1	1	1	1	1	14.1	14.1	14.1	19.663	184	184;144	1	9	0.00075988	2.8158	14.1	14.1	14.1	148300000	20084000	29582000	19199000	1	1	2	6
B8ZZD4;Q86VP1-3;Q86VP1-4;Q86VP1-2;Q86VP1;H7C3L5	B8ZZD4;Q86VP1-3;Q86VP1-4;Q86VP1-2;Q86VP1	5;5;5;5;5;1	5;5;5;5;5;1	5;5;5;5;5;1	0	41277000	36714000	Tax1-binding protein 1	TAX1BP1	;;;;	6	5	5	5	3	4	3	3	4	3	3	4	3	6.4	6.4	6.4	93.609	813	813;563;590;747;789;326	1	34	0	4.3669	4.3	5	4.3	470520000	40377000	64662000	28670000	0	2	1	9
B8ZZF8;Q9Y4Y9	B8ZZF8;Q9Y4Y9	1;1	1;1	1;1	0	0	42119000	U6 snRNA-associated Sm-like protein LSm5	LSM5	;	2	1	1	1	0	0	1	0	0	1	0	0	1	29.7	29.7	29.7	7.0202	64	64;91	1	10	0	4.9824	0	0	29.7	340240000	0	0	37461000	0	0	0	8
B8ZZN6;P63165;B8ZZ67;P63165-2;B8ZZJ0;B9A032	B8ZZN6;P63165;B8ZZ67;P63165-2	5;5;3;3;2;2	5;5;3;3;2;2	5;5;3;3;2;2	310650000	303220000	286910000	Small ubiquitin-related modifier 1	SUMO1	;;;	6	5	5	5	5	5	5	5	5	5	5	5	5	35.6	35.6	35.6	16.645	146	146;101;62;76;58;77	1	57	0	12.901	35.6	35.6	35.6	3484800000	318030000	380360000	330370000	3	1	3	22
B8ZZQ6;P06454-2;P06454;B8ZZA1;B8ZZW7;H7C2N1	B8ZZQ6;P06454-2;P06454;B8ZZA1;B8ZZW7;H7C2N1	7;7;7;6;6;6	7;7;7;6;6;6	7;7;7;6;6;6	1592500000	2328700000	2298100000	Prothymosin alpha;Prothymosin alpha, N-terminally processed;Thymosin alpha-1	PTMA	;;;;;	6	7	7	7	7	7	7	7	7	7	7	7	7	37.4	37.4	37.4	11.758	107	107;110;111;131;136;148	1	155	0	133.89	37.4	37.4	37.4	30189000000	1931000000	2680200000	2230000000	11	13	15	157
B8ZZS4;Q9H8Y5	B8ZZS4;Q9H8Y5	5;5	5;5	5;5	32000000	0	42793000	Ankyrin repeat and zinc finger domain-containing protein 1	ANKZF1	;	2	5	5	5	3	1	4	3	1	4	3	1	4	15.9	15.9	15.9	57.572	516	516;726	1	29	0	19.577	9.9	4.8	11.8	381110000	35984000	12945000	44851000	2	0	3	13
B9A062;B8ZZU9;P13995;B4DY35;Q7Z650	B9A062;B8ZZU9;P13995;B4DY35;Q7Z650	2;2;2;1;1	2;2;2;1;1	2;2;2;1;1	0	0	25483000	Bifunctional methylenetetrahydrofolate dehydrogenase/cyclohydrolase, mitochondrial;NAD-dependent methylenetetrahydrofolate dehydrogenase;Methenyltetrahydrofolate cyclohydrolase	MTHFD2	;;;;	5	2	2	2	2	1	1	2	1	1	2	1	1	14.9	14.9	14.9	23.867	222	222;267;350;186;248	1	13	0	4.0449	14.9	5.4	5.4	198010000	5324500	23634000	22665000	2	1	1	12
B9ZVT1;Q8IXT5	B9ZVT1;Q8IXT5	2;2	2;2	2;2	0	0	18413000	RNA-binding protein 12B	RBM12B	;	2	2	2	2	2	1	2	2	1	2	2	1	2	2.6	2.6	2.6	102.7	881	881;1001	1	18	0.0017474	2.634	2.6	1	2.6	125850000	10293000	8978200	16377000	0	0	1	1
B9ZVX0;E9PHQ0;E7ET75;E9PEZ3;H9KV28;O60610-2;O60610-3;O60610;E7ERW8;E7EMV0;B4E2I7;E5RJ79	B9ZVX0;E9PHQ0;E7ET75;E9PEZ3;H9KV28;O60610-2;O60610-3;O60610;E7ERW8;E7EMV0	40;40;40;40;40;40;40;40;39;22;4;1	40;40;40;40;40;40;40;40;39;22;4;1	40;40;40;40;40;40;40;40;39;22;4;1	1117300000	1097000000	1123800000	Protein diaphanous homolog 1	DIAPH1	;;;;;;;;;	12	40	40	40	34	33	26	34	33	26	34	33	26	39.7	39.7	39.7	138.93	1248	1248;1260;1264;1269;1273;1248;1263;1272;1215;863;201;112	1	475	0	230.67	31.8	32.1	26.7	14403000000	1282100000	1454100000	978570000	24	28	16	232
C9IYF5;C9JEG3;F5GZK1;Q9UBQ6	C9IYF5;C9JEG3;F5GZK1;Q9UBQ6	1;1;1;1	1;1;1;1	1;1;1;1	0	14275000	0	Exostosin-like 2;Processed exostosin-like 2	EXTL2	;;;	4	1	1	1	0	1	0	0	1	0	0	1	0	9.4	9.4	9.4	13.253	117	117;266;317;330	1	3	0.0071859	1.8716	0	9.4	0	41207000	0	16039000	0	0	0	0	0
C9IYQ7;F8WCF5;F8WEL4;B4DYB4;Q8NFH5	C9IYQ7;F8WCF5;F8WEL4;B4DYB4;Q8NFH5	1;1;1;1;1	1;1;1;1;1	1;1;1;1;1	0	0	11909000	Nucleoporin NUP53	NUP35	;;;;	5	1	1	1	1	1	1	1	1	1	1	1	1	16.5	16.5	16.5	11.723	115	115;136;152;309;326	1	9	0.000259	3.1344	16.5	16.5	16.5	60177000	7505500	16608000	10592000	1	1	1	5
C9J0I9;Q86WB0-3;Q86WB0-2;Q86WB0	C9J0I9;Q86WB0-3;Q86WB0-2;Q86WB0	5;5;5;5	5;5;5;5	5;5;5;5	43879000	49409000	40215000	Nuclear-interacting partner of ALK	ZC3HC1	;;;	4	5	5	5	2	3	3	2	3	3	2	3	3	13.7	13.7	13.7	50.562	459	459;431;481;502	1	46	0	6.791	4.4	7.6	7.8	538560000	33002000	53377000	41968000	0	1	1	18
C9J0J7;G5E9Q6;P35080-2	C9J0J7;G5E9Q6;P35080-2	4;4;4	1;1;1	1;1;1	0	67256000	0	Profilin;Profilin-2	PFN2	;;	3	4	1	1	4	3	3	1	1	1	1	1	1	54.9	9.9	9.9	9.8402	91	91;188;140	1	12	0.0040738	2.2049	54.9	40.7	40.7	681950000	0	75567000	0	1	1	1	8
C9J0K6;P30626-3;P30626-2;P30626;B4DHQ6	C9J0K6;P30626-3;P30626-2;P30626;B4DHQ6	8;8;8;8;4	8;8;8;8;4	8;8;8;8;4	543560000	478040000	439000000	Sorcin	SRI	;;;;	5	8	8	8	7	5	6	7	5	6	7	5	6	51	51	51	17.605	155	155;180;183;198;158	1	90	0	22.899	43.9	29	36.1	4870800000	499060000	386190000	352290000	4	2	3	44
C9J173;B8ZZF6;E7ET59;E7EUX4;E7ENF2;P49441;C9J128;C9J2Z6	C9J173;B8ZZF6;E7ET59;E7EUX4;E7ENF2;P49441;C9J128;C9J2Z6	2;2;2;2;2;2;1;1	2;2;2;2;2;2;1;1	2;2;2;2;2;2;1;1	40779000	40038000	0	Inositol polyphosphate 1-phosphatase	INPP1	;;;;;;;	8	2	2	2	2	2	1	2	2	1	2	2	1	20.3	20.3	20.3	16.132	143	143;155;190;212;213;399;68;88	1	16	0	8.073	20.3	20.3	8.4	393180000	44289000	42421000	25574000	1	2	0	8
C9J2C0;Q9NY65-2;Q9NY65	C9J2C0;Q9NY65-2;Q9NY65	14;14;14	1;1;1	1;1;1	0	0	59656000	Tubulin alpha-8 chain	TUBA8	;;	3	14	1	1	13	13	13	1	1	1	1	1	1	32.8	1.5	1.5	51.984	467	467;383;449	1	11	1	-2	32.8	32.8	32.8	606310000	55413000	48802000	53059000	0	0	0	1
C9J2G3;C9JQQ2;Q9NWU1-2;Q9NWU1;F8VNS3	C9J2G3;C9JQQ2;Q9NWU1-2;Q9NWU1;F8VNS3	2;2;2;2;1	2;2;2;2;1	2;2;2;2;1	0	33016000	0	3-oxoacyl-[acyl-carrier-protein] synthase, mitochondrial	OXSM	;;;;	5	2	2	2	1	2	1	1	2	1	1	2	1	16.8	16.8	16.8	23.632	220	220;231;376;459;102	1	21	0	6.2101	6.8	16.8	10	293300000	11766000	37401000	22354000	0	1	0	14
C9J316;C9JGV1;O95905-2;O95905;O95905-3	C9J316;C9JGV1;O95905-2;O95905;O95905-3	1;1;1;1;1	1;1;1;1;1	1;1;1;1;1	0	7231200	0	Protein SGT1	ECD	;;;;	5	1	1	1	1	1	0	1	1	0	1	1	0	6.6	6.6	6.6	24.219	212	212;217;601;644;677	1	10	0.0002611	3.2341	6.6	6.6	0	63561000	11047000	8124800	0	1	2	0	12
C9J384;Q9BQ75-2;Q9BQ75;H7C515	C9J384;Q9BQ75-2;Q9BQ75;H7C515	2;2;2;1	2;2;2;1	2;2;2;1	0	0	17488000	Protein CMSS1	CMSS1	;;;	4	2	2	2	1	1	1	1	1	1	1	1	1	12.4	12.4	12.4	26.228	225	225;261;279;82	1	14	0.0040438	2.1136	4.9	4.9	4.9	168090000	14632000	17569000	15554000	0	1	0	4
C9J4K0;Q9BVC5-2;Q9BVC5	C9J4K0;Q9BVC5-2;Q9BVC5	1;1;1	1;1;1	1;1;1	0	0	14230000	Ashwin	C2orf49	;;	3	1	1	1	1	1	1	1	1	1	1	1	1	8.9	8.9	8.9	21.356	190	190;228;232	1	8	0.00025674	2.9746	8.9	8.9	8.9	120420000	16670000	19529000	12656000	0	0	1	2
C9J4M6;C9J2Y9;P30876	C9J4M6;C9J2Y9;P30876	8;8;8	8;8;8	8;8;8	68352000	56467000	79542000	DNA-directed RNA polymerase;DNA-directed RNA polymerase II subunit RPB2	POLR2B	;;	3	8	8	8	4	4	4	4	4	4	4	4	4	8.7	8.7	8.7	125.19	1099	1099;1167;1174	1	61	0	13.996	4.8	4.7	4.7	804270000	53310000	50821000	69977000	2	0	1	17
C9J4Z3;P61513;M0R0A1;Q6P4E4;E9PEL3;M0R2L6;G5E9R3;A6NKH3	C9J4Z3;P61513;M0R0A1;Q6P4E4;E9PEL3;M0R2L6;G5E9R3	5;5;4;4;4;4;3;1	5;5;4;4;4;4;3;1	5;5;4;4;4;4;3;1	1157100000	802900000	679170000	60S ribosomal protein L37a	RPL37A	;;;;;;	8	5	5	5	5	5	5	5	5	5	5	5	5	69.1	69.1	69.1	7.624	68	68;92;60;72;75;88;58;93	1	102	0	96.421	69.1	69.1	69.1	11698000000	1176900000	875880000	652870000	6	5	6	71
C9J5N1;Q9BTE6;Q9BTE6-2;Q9BTE6-3;K7EQ85;L7N2F4	C9J5N1;Q9BTE6;Q9BTE6-2;Q9BTE6-3;K7EQ85	4;4;4;4;3;1	4;4;4;4;3;1	4;4;4;4;3;1	28621000	23281000	35038000	Alanyl-tRNA editing protein Aarsd1	PTGES3L-AARSD1;AARSD1	;;;;	6	4	4	4	2	4	3	2	4	3	2	4	3	10.1	10.1	10.1	55.065	495	495;412;525;586;94;140	1	32	0	5.2951	6.1	10.1	7.5	290460000	23275000	32185000	30778000	2	3	2	18
C9J5W6;Q9UI15;H7C5N2	C9J5W6;Q9UI15	3;3;1	1;1;1	1;1;1	0	0	22748000	Transgelin-3	TAGLN3	;	3	3	1	1	3	3	2	1	1	1	1	1	1	30.4	12.2	12.2	12.886	115	115;199;78	1	10	0.0080664	1.7973	30.4	30.4	24.3	165800000	15805000	12368000	20232000	0	0	0	1
C9J6N5;C9JQ40;C9JW51;Q9H098;C9J3Q3;Q9H098-2;X6RET8;C9JP05;C9JYP1;C9J6Y8;F8WCJ2	C9J6N5;C9JQ40;C9JW51;Q9H098;C9J3Q3;Q9H098-2;X6RET8;C9JP05	5;5;5;5;4;4;3;3;2;2;1	5;5;5;5;4;4;3;3;2;2;1	5;5;5;5;4;4;3;3;2;2;1	80030000	93226000	91722000	Protein FAM107B	FAM107B	;;;;;;;	11	5	5	5	4	5	4	4	5	4	4	5	4	49.2	49.2	49.2	14.844	124	124;126;128;131;101;306;90;93;67;84;51	1	45	0	8.8687	41.1	49.2	38.7	1023700000	110940000	160820000	81564000	2	3	1	15
C9J712;P35080;C9JQ45;C9J2N0	C9J712;P35080;C9JQ45;C9J2N0	5;5;3;3	5;5;3;3	2;2;0;1	228680000	222530000	164200000	Profilin-2;Profilin	PFN2	;;;	4	5	5	2	5	4	4	5	4	4	2	2	2	64.8	64.8	19.8	9.7982	91	91;140;110;125	1	70	0	30.629	64.8	50.5	50.5	2915800000	351110000	292670000	180890000	3	3	1	42
C9J7K9;O15162-2;O15162;H7C5I5;C9J9P4;C9J0H3;C9JE06	C9J7K9;O15162-2;O15162;H7C5I5;C9J9P4	5;5;5;4;3;2;2	5;5;5;4;3;2;2	5;5;5;4;3;2;2	292990000	322560000	312200000	Phospholipid scramblase 1	PLSCR1	;;;;	7	5	5	5	4	4	3	4	4	3	4	4	3	18.3	18.3	18.3	34.217	311	311;237;318;171;248;171;249	1	65	0	24.66	15.1	15.1	12.9	4265800000	410870000	381960000	118300000	1	2	1	22
C9J7Y4;Q8WWK9-4;E9PD90;Q8WWK9-5;Q8WWK9	C9J7Y4;Q8WWK9-4;E9PD90;Q8WWK9-5;Q8WWK9	1;1;1;1;1	1;1;1;1;1	1;1;1;1;1	0	0	9682400	Cytoskeleton-associated protein 2	CKAP2	;;;;	5	1	1	1	0	1	1	0	1	1	0	1	1	13.4	13.4	13.4	10.865	97	97;494;634;682;683	1	6	0.005185	2.0084	0	13.4	13.4	60005000	0	11571000	8611600	0	0	0	2
C9J880;Q68CQ7-2;Q68CQ7;C9JA13	C9J880;Q68CQ7-2;Q68CQ7;C9JA13	2;2;2;1	2;2;2;1	2;2;2;1	0	0	15449000	Glycosyltransferase 8 domain-containing protein 1	GLT8D1	;;;	4	2	2	2	1	1	2	1	1	2	1	1	2	15.5	15.5	15.5	19.42	174	174;259;371;110	1	11	0.0029254	2.3865	6.3	6.3	15.5	92667000	8804200	10604000	13741000	0	0	0	0
C9J8Q1;F8W9P7;H7C537;Q9UMS0-2;Q9UMS0-3;Q9UMS0	C9J8Q1;F8W9P7;H7C537;Q9UMS0-2;Q9UMS0-3;Q9UMS0	1;1;1;1;1;1	1;1;1;1;1;1	1;1;1;1;1;1	41947000	45134000	44016000	NFU1 iron-sulfur cluster scaffold homolog, mitochondrial	NFU1	;;;;;	6	1	1	1	1	1	1	1	1	1	1	1	1	15.6	15.6	15.6	10.443	96	96;99;126;113;230;254	1	24	0.00050826	2.8694	15.6	15.6	15.6	528580000	44406000	49018000	38692000	2	2	2	20
C9J8T0;P57772	C9J8T0;P57772	4;4	4;4	4;4	52033000	0	41318000	Selenocysteine-specific elongation factor	EEFSEC	;	2	4	4	4	4	1	3	4	1	3	4	1	3	11	11	11	47.876	436	436;596	1	42	0	5.7994	11	2.5	7.8	539150000	79856000	9920000	27363000	2	1	0	14
C9J8T6;Q14061;H7C4E5	C9J8T6;Q14061;H7C4E5	2;2;1	2;2;1	2;2;1	48436000	37032000	0	Cytochrome c oxidase copper chaperone	COX17	;;	3	2	2	2	2	2	1	2	2	1	2	2	1	29.6	29.6	29.6	10.853	98	98;63;58	1	22	0	10.935	29.6	29.6	16.3	486230000	51412000	41748000	17828000	1	1	0	9
C9J9K3;P08865;A6NE09;C9JQR9	C9J9K3;P08865;A6NE09	15;15;13;4	15;15;13;4	15;15;13;4	8612400000	8681000000	8491800000	40S ribosomal protein SA	RPSA;RPSAP58	;;	4	15	15	15	15	15	15	15	15	15	15	15	15	70	70	70	29.404	263	263;295;295;73	1	366	0	323.31	70	70	70	101650000000	8791600000	9853900000	7969600000	26	30	20	278
C9JA08;Q96D46;C9J0B9;C9IZW9;C9K0C2;C9IY70	C9JA08;Q96D46	10;10;3;2;2;1	10;10;3;2;2;1	10;10;3;2;2;1	176450000	153310000	152730000	60S ribosomal export protein NMD3	NMD3	;	6	10	10	10	7	5	8	7	5	8	7	5	8	31.4	31.4	31.4	60.125	529	529;503;218;155;162;98	1	89	0	23.179	15.9	12.9	27.6	1944300000	269320000	170950000	203140000	4	6	4	46
C9JA28;Q9UNL2;B4E2P2;C9J365	C9JA28;Q9UNL2;B4E2P2;C9J365	2;2;2;1	2;2;2;1	2;2;2;1	349990000	460470000	563950000	Translocon-associated protein subunit gamma	SSR3	;;;	4	2	2	2	2	2	2	2	2	2	2	2	2	12.6	12.6	12.6	20.161	174	174;185;198;133	1	35	0	22.868	12.6	12.6	12.6	5797700000	427530000	558080000	423330000	3	2	2	25
C9JA33;D3YTA4;B1ALY0;Q8IXS6;Q8IXS6-2	C9JA33;D3YTA4;B1ALY0;Q8IXS6;Q8IXS6-2	1;1;1;1;1	1;1;1;1;1	1;1;1;1;1	0	0	11602000	Paralemmin-2	PALM2;PALM2-AKAP2	;;;;	5	1	1	1	1	1	1	1	1	1	1	1	1	3.7	3.7	3.7	41.924	377	377;413;433;379;411	1	10	0.0099502	1.6347	3.7	3.7	3.7	137770000	16680000	15401000	10319000	0	0	1	2
C9JAB2;Q16629-3;Q16629-2;Q16629-4;Q16629;F8WEA1	C9JAB2;Q16629-3;Q16629-2;Q16629-4;Q16629	8;8;8;8;8;3	8;8;8;8;8;3	7;7;7;7;7;3	1001600000	1130900000	1098300000	Serine/arginine-rich splicing factor 7	SRSF7	;;;;	6	8	8	7	7	7	7	7	7	7	6	6	6	31.9	31.9	31.9	26.928	235	235;132;135;226;238;51	1	136	0	33.443	28.1	28.1	28.1	14011000000	1043600000	1338600000	1037700000	7	6	9	91
C9JAG1;Q9C0D9	C9JAG1;Q9C0D9	2;2	2;2	2;2	0	46396000	0	Ethanolaminephosphotransferase 1	EPT1	;	2	2	2	2	1	2	1	1	2	1	1	2	1	21.7	21.7	21.7	20.557	180	180;397	1	15	0	14.786	12.8	21.7	8.9	385680000	37786000	71230000	28869000	1	2	1	9
C9JAW5;C9JNU6;Q9Y241;A8MV81;Q9Y241-2	C9JAW5;C9JNU6;Q9Y241;A8MV81;Q9Y241-2	2;2;2;1;1	2;2;2;1;1	2;2;2;1;1	48220000	51613000	0	HIG1 domain family member 1A, mitochondrial;HIG1 domain family member 1C	HIGD1A;HIGD1C	;;;;	5	2	2	2	2	2	1	2	2	1	2	2	1	32.5	32.5	32.5	8.8131	83	83;96;93;97;107	1	20	0	28.755	32.5	32.5	21.7	483390000	51903000	57751000	26894000	1	2	2	21
C9JC60;G5E977;Q6XQN6;Q6XQN6-2;C9J8U2;Q6XQN6-3;H0YF31;H0YDA6	C9JC60;G5E977;Q6XQN6;Q6XQN6-2;C9J8U2;Q6XQN6-3	12;12;12;12;10;10;3;1	12;12;12;12;10;10;3;1	12;12;12;12;10;10;3;1	234040000	254050000	227810000	Nicotinate phosphoribosyltransferase	NAPRT	;;;;;	8	12	12	12	10	10	8	10	10	8	10	10	8	36.6	36.6	36.6	60.234	566	566;584;538;567;490;525;163;128	1	114	0	51.968	30	27.7	19.8	2826300000	282280000	311370000	179290000	8	4	4	48
C9JCC6;Q14919;Q14919-2;E9PQX9;E9PNC7;E9PMW2	C9JCC6;Q14919;Q14919-2;E9PQX9	5;5;5;4;2;1	5;5;5;4;2;1	5;5;5;4;2;1	208390000	222190000	249820000	Dr1-associated corepressor	DRAP1	;;;	6	5	5	5	4	4	5	4	4	5	4	4	5	24.5	24.5	24.5	23.205	212	212;205;211;185;155;161	1	50	0	9.0943	24.1	24.1	24.5	2506200000	220020000	258710000	241680000	2	4	4	36
C9JCN0;Q9NZM1-3;H0YD14;Q9NZM1-7;Q9NZM1-8;Q9NZM1-4;O75923-15;O75923-3;O75923-9;O75923;O75923-14;O75923-6;O75923-12;O75923-5;O75923-11;O75923-4;O75923-10;O75923-2;O75923-8;O75923-7;O75923-13	C9JCN0;Q9NZM1-3;H0YD14	92;91;51;22;19;9;2;2;2;2;2;2;2;2;2;2;2;2;2;2;2	1;0;0;0;0;0;0;0;0;0;0;0;0;0;0;0;0;0;0;0;0	1;0;0;0;0;0;0;0;0;0;0;0;0;0;0;0;0;0;0;0;0	0	0	25474000	Myoferlin	MYOF	;;	21	92	1	1	79	79	76	1	1	1	1	1	1	55.9	0.6	0.6	233.43	2051	2051;2050;1177;445;419;160;1954;2066;2067;2080;2081;2087;2088;2097;2098;2101;2102;2111;2112;2118;2119	1	12	1	-2	49	48.6	45.9	403340000	29908000	34606000	22657000	0	0	0	1
C9JCN8;P15408-3;P15408;P15408-2	C9JCN8;P15408-3;P15408;P15408-2	3;3;3;2	3;3;3;2	3;3;3;2	0	0	48029000	Fos-related antigen 2	FOSL2	;;;	4	3	3	3	2	1	3	2	1	3	2	1	3	25.2	25.2	25.2	22.254	202	202;287;326;318	1	21	0	7.4606	14.9	5.9	25.2	402610000	43247000	31925000	73755000	0	0	1	8
C9JDG0;Q9NSV4-7;Q9NSV4-6;Q9NSV4-5;Q9NSV4-4;Q9NSV4;Q9NSV4-2;Q9NSV4-1	C9JDG0;Q9NSV4-7;Q9NSV4-6;Q9NSV4-5;Q9NSV4-4;Q9NSV4;Q9NSV4-2;Q9NSV4-1	7;7;7;7;7;7;4;4	7;7;7;7;7;7;4;4	7;7;7;7;7;7;4;4	80903000	71098000	60810000	Protein diaphanous homolog 3	DIAPH3	;;;;;;;	8	7	7	7	5	4	6	5	4	6	5	4	6	7.2	7.2	7.2	136.88	1193	1193;1112;1123;1147;1182;1193;691;849	1	64	0	13.256	5.4	3.4	6.2	877120000	91101000	61569000	66947000	2	1	2	22
C9JE12;C9JCW7;Q9BVT8	C9JE12;C9JCW7;Q9BVT8	1;1;1	1;1;1	1;1;1	0	0	15325000	Transmembrane and ubiquitin-like domain-containing protein 1	TMUB1	;;	3	1	1	1	0	0	1	0	0	1	0	0	1	19.1	19.1	19.1	16.12	152	152;170;246	1	6	0.009948	1.6312	0	0	19.1	94242000	0	0	13630000	0	0	1	5
C9JES6;Q14012	C9JES6;Q14012	2;2	2;2	2;2	11894000	0	0	Calcium/calmodulin-dependent protein kinase type 1	CAMK1	;	2	2	2	2	2	1	0	2	1	0	2	1	0	16.4	16.4	16.4	14.021	122	122;370	1	16	0.0033702	2.242	16.4	8.2	0	94256000	12390000	6687700	0	0	0	0	1
C9JEV0;P25311	C9JEV0;P25311	1;1	1;1	1;1	0	13059000	0	Zinc-alpha-2-glycoprotein	AZGP1	;	2	1	1	1	0	1	0	0	1	0	0	1	0	5.3	5.3	5.3	26.353	227	227;298	1	6	0.00050994	2.9066	0	5.3	0	78117000	0	14673000	0	0	0	0	1
C9JEV9;O95639-3;O95639-2;O95639;B7Z7B0;H7C419	C9JEV9;O95639-3;O95639-2;O95639;B7Z7B0;H7C419	2;2;2;2;1;1	2;2;2;2;1;1	2;2;2;2;1;1	0	26160000	0	Cleavage and polyadenylation specificity factor subunit 4	CPSF4	;;;;;	6	2	2	2	1	2	1	1	2	1	1	2	1	10	10	10	23.653	211	211;243;244;269;191;193	1	10	0.00026817	3.5646	4.3	10	4.3	113380000	15309000	29393000	6131000	0	1	0	3
C9JFE4;Q13098-5;Q13098;Q13098-7;Q13098-6;J3KSA5;J3QLT0;J3KRJ4;J3QS88;J3KTB0;J3QQX0;J3QS84;J3QLE8;J3QL53;J3KRE8	C9JFE4;Q13098-5;Q13098;Q13098-7;Q13098-6	16;16;16;16;11;7;5;5;4;4;3;3;3;3;3	16;16;16;16;11;7;5;5;4;4;3;3;3;3;3	16;16;16;16;11;7;5;5;4;4;3;3;3;3;3	546120000	519230000	555250000	COP9 signalosome complex subunit 1	GPS1	;;;;	15	16	16	16	14	13	15	14	13	15	14	13	15	48.2	48.2	48.2	53.371	471	471;487;491;527;549;210;168;253;134;139;79;101;166;168;186	1	190	0	88.385	45.6	43.5	42.3	6320000000	655960000	679370000	522890000	10	9	7	80
C9JFV4;Q8IZL8;I3L3A8;F8WDZ1;I3L4M7;I3L445;E7EV54;I3L1P4	C9JFV4;Q8IZL8;I3L3A8;F8WDZ1	10;10;9;8;4;4;4;3	10;10;9;8;4;4;4;3	10;10;9;8;4;4;4;3	83284000	81165000	50647000	Proline-, glutamic acid- and leucine-rich protein 1	PELP1	;;;	8	10	10	10	7	6	5	7	6	5	7	6	5	14.8	14.8	14.8	135.51	1274	1274;1130;1180;1040;151;301;906;148	1	89	0	29.432	9.3	7.5	6.9	983720000	72475000	70703000	26407000	4	5	2	37
C9JG87;Q9NYK5;Q9NYK5-2	C9JG87;Q9NYK5;Q9NYK5-2	5;5;5	5;5;5	5;5;5	73807000	78400000	83895000	39S ribosomal protein L39, mitochondrial	MRPL39	;;	3	5	5	5	4	5	3	4	5	3	4	5	3	20.5	20.5	20.5	34.032	297	297;338;353	1	45	0	12.329	16.5	20.5	13.8	954890000	85647000	121960000	56876000	1	3	2	19
C9JG97;C9JEH3;Q13685;C9JTS3;H7C0R2	C9JG97;C9JEH3;Q13685;C9JTS3	6;6;6;4;2	6;6;6;4;2	6;6;6;4;2	93843000	113080000	56537000	Angio-associated migratory cell protein	AAMP	;;;	5	6	6	6	4	5	2	4	5	2	4	5	2	21.2	21.2	21.2	44.693	415	415;435;434;200;189	1	59	0	10.957	12	18.1	5.8	1031600000	91149000	162110000	27596000	3	1	1	18
C9JIF9;P13798;H7C393;H7C1U0;C9JLK2;F8WEH5	C9JIF9;P13798	18;18;8;7;4;2	18;18;8;7;4;2	18;18;8;7;4;2	549440000	525710000	511590000	Acylamino-acid-releasing enzyme	APEH	;	6	18	18	18	13	13	10	13	13	10	13	13	10	37.2	37.2	37.2	81.673	737	737;732;284;308;232;50	1	195	0	78.863	29	27.3	25.4	6488400000	603650000	492730000	411770000	11	11	6	108
C9JIZ6;B1AVU8;P07602;P07602-2;P07602-3	C9JIZ6;B1AVU8;P07602;P07602-2;P07602-3	17;17;17;17;17	17;17;17;17;17	17;17;17;17;17	1120500000	1151100000	1079000000	Prosaposin;Saposin-A;Saposin-B-Val;Saposin-B;Saposin-C;Saposin-D	PSAP	;;;;	5	17	17	17	14	12	12	14	12	12	14	12	12	33.3	33.3	33.3	58.353	526	526;559;524;526;527	1	191	0	26.242	28.7	22.6	22.2	14775000000	1105400000	1465000000	886840000	8	6	6	91
C9JJ19;P82930	C9JJ19;P82930	9;9	9;9	9;9	141710000	124410000	120540000	28S ribosomal protein S34, mitochondrial	MRPS34	;	2	9	9	9	6	5	6	6	5	6	6	5	6	48.9	48.9	48.9	26.332	225	225;218	1	70	0	9.338	24.4	21.8	33.8	1560500000	131360000	139770000	120230000	4	4	3	37
C9JLU1;P52434;P52434-3;P52434-4;P52434-2;P52434-5	C9JLU1;P52434;P52434-3;P52434-4;P52434-2	4;4;3;3;2;1	4;4;3;3;2;1	4;4;3;3;2;1	76620000	78834000	84768000	DNA-directed RNA polymerases I, II, and III subunit RPABC3	POLR2H	;;;;	6	4	4	4	2	2	3	2	2	3	2	2	3	35.1	35.1	35.1	16.925	148	148;150;114;175;122;86	1	31	0	7.6133	19.6	19.6	27.7	986600000	83892000	83888000	169240000	1	1	2	16
C9JME2;Q9Y4F1;Q9Y4F1-2;M0QYB0;H0Y783;M0QXT1;M0R262;Q9Y4F1-3	C9JME2;Q9Y4F1;Q9Y4F1-2	8;8;8;3;2;2;1;1	8;8;8;3;2;2;1;1	8;8;8;3;2;2;1;1	50246000	44611000	0	FERM, RhoGEF and pleckstrin domain-containing protein 1	FARP1	;;	8	8	8	8	4	2	3	4	2	3	4	2	3	10.9	10.9	10.9	122.09	1076	1076;1045;1076;203;215;248;171;129	1	45	0	9.9514	5.9	2.5	4	490040000	52549000	29690000	31364000	2	1	0	13
C9JNA8;Q92551-2;Q92551	C9JNA8;Q92551-2;Q92551	1;1;1	1;1;1	1;1;1	8947100	0	0	Inositol hexakisphosphate kinase 1	IP6K1	;;	3	1	1	1	1	0	0	1	0	0	1	0	0	4.4	4.4	4.4	31.293	274	274;276;441	1	10	0.0099525	1.6383	4.4	0	0	65863000	9604300	0	0	0	0	0	2
C9JNK6;O75431-2;O75431;C9JAZ1	C9JNK6;O75431-2;O75431;C9JAZ1	3;3;3;2	3;3;3;2	3;3;3;2	71095000	83444000	103400000	Metaxin-2	MTX2	;;;	4	3	3	3	3	3	3	3	3	3	3	3	3	21.7	21.7	21.7	23.643	207	207;253;263;229	1	51	0	16.05	21.7	21.7	21.7	1244500000	85433000	111380000	109550000	4	4	3	35
C9JNW5;P83731;C9JXB8	C9JNW5;P83731;C9JXB8	10;10;9	10;10;9	10;10;9	2488100000	2578900000	2473600000	60S ribosomal protein L24	RPL24	;;	3	10	10	10	9	9	7	9	9	7	9	9	7	52.7	52.7	52.7	17.542	150	150;157;121	1	170	0	31.782	48	46	40.7	30981000000	3096500000	3458100000	2461400000	8	6	8	87
C9JP00;Q9NR56;Q9NR56-3;Q9NR56-4;Q9NR56-7;Q9NR56-6;Q9NR56-2;Q9NR56-5;H7C4T5;O95205;Q86VM6;Q5VZF2-3;Q5VZF2-2;Q5VZF2;C9JCX1;B4E3F7;H7C4Y1	C9JP00;Q9NR56;Q9NR56-3;Q9NR56-4;Q9NR56-7;Q9NR56-6;Q9NR56-2;Q9NR56-5;H7C4T5;O95205;Q86VM6;Q5VZF2-3;Q5VZF2-2;Q5VZF2	6;6;5;5;5;5;5;5;4;3;3;3;3;3;2;2;2	6;6;5;5;5;5;5;5;4;3;3;3;3;3;2;2;2	6;6;5;5;5;5;5;5;4;3;3;3;3;3;2;2;2	175190000	179990000	190540000	Muscleblind-like protein 1;Muscleblind-like protein 2	MBNL1;MBLL;MBNL2	;;;;;;;;;;;;;	17	6	6	6	5	4	4	5	4	4	5	4	4	23.6	23.6	23.6	37.898	348	348;388;302;314;340;342;370;382;329;255;343;361;367;373;155;206;210	1	58	0	10.214	17.5	19	18.7	2017700000	217820000	229810000	140300000	2	0	1	23
C9JP51;C9JPT9;Q6UXB0-2;Q6UXB0;Q6UXB0-3	C9JP51;C9JPT9;Q6UXB0-2;Q6UXB0;Q6UXB0-3	1;1;1;1;1	1;1;1;1;1	1;1;1;1;1	0	20053000	0	Protein FAM131A	FAM131A	;;;;	5	1	1	1	1	1	0	1	1	0	1	1	0	6.1	6.1	6.1	24.738	231	231;251;281;335;366	1	10	0.0022228	2.5539	6.1	6.1	0	326480000	31738000	22531000	0	0	1	0	3
C9JP85;Q16656-2;Q16656;Q16656-4	C9JP85;Q16656-2;Q16656;Q16656-4	1;1;1;1	1;1;1;1	1;1;1;1	0	0	14518000	Nuclear respiratory factor 1	NRF1	;;;	4	1	1	1	0	0	1	0	0	1	0	0	1	5.7	5.7	5.7	22.689	209	209;437;503;522	1	6	0.0010096	2.7661	0	0	5.7	73788000	0	0	12912000	0	0	1	2
C9JPX5;C9JKL2;O95772-2;O95772;C9JJ39;C9J3F5	C9JPX5;C9JKL2;O95772-2;O95772;C9JJ39;C9J3F5	2;2;2;2;1;1	2;2;2;2;1;1	2;2;2;2;1;1	0	0	11324000	MLN64 N-terminal domain homolog	STARD3NL	;;;;;	6	2	2	2	2	0	2	2	0	2	2	0	2	11.7	11.7	11.7	23.505	206	206;216;227;234;172;184	1	9	0.0040641	2.1861	11.7	0	11.7	86255000	29978000	0	10072000	1	0	0	2
C9JQ41;H7C525;Q4VC31	C9JQ41;H7C525;Q4VC31	3;3;3	3;3;3	3;3;3	54554000	58069000	0	Coiled-coil domain-containing protein 58	CCDC58	;;	3	3	3	3	2	2	1	2	2	1	2	2	1	21.5	21.5	21.5	15.296	130	130;141;144	1	27	0.00027012	3.6801	13.1	13.1	6.9	545010000	41341000	47426000	8786800	2	0	0	11
C9JQV0;Q9BRJ6;H7C0T1;H7C2R9	C9JQV0;Q9BRJ6	3;3;1;1	3;3;1;1	3;3;1;1	67322000	112900000	84515000	Uncharacterized protein C7orf50	C7orf50	;	4	3	3	3	3	3	3	3	3	3	3	3	3	29.7	29.7	29.7	21.883	192	192;194;162;179	1	37	0	7.7894	29.7	29.7	29.7	1140200000	68019000	125970000	91904000	1	3	2	15
C9JQV3;Q8N1F8	C9JQV3;Q8N1F8	1;1	1;1	1;1	0	0	7187700	Serine/threonine-protein kinase 11-interacting protein	STK11IP	;	2	1	1	1	1	1	1	1	1	1	1	1	1	1	1	1	120.26	1088	1088;1099	1	9	0.0069881	1.9159	1	1	1	57917000	6769600	5889400	6392800	0	0	0	2
C9JRA9;C9JCM6;C9JWU9;C9JSW2;C9JW74;Q5EB52-3;Q5EB52-2;Q5EB52	C9JRA9;C9JCM6;C9JWU9;C9JSW2;C9JW74;Q5EB52-3;Q5EB52-2;Q5EB52	1;1;1;1;1;1;1;1	1;1;1;1;1;1;1;1	1;1;1;1;1;1;1;1	0	0	15865000	Mesoderm-specific transcript homolog protein	MEST	;;;;;;;	8	1	1	1	0	0	1	0	0	1	0	0	1	11.9	11.9	11.9	18.537	160	160;169;207;232;296;292;326;335	1	8	0	4.9447	0	0	11.9	103230000	0	0	14110000	0	0	0	1
C9JRP1;E9PFN4;Q9Y6M7-11;Q9Y6M7-14;Q9Y6M7-10;Q9Y6M7-4;Q9Y6M7-3;Q9Y6M7-2;Q9Y6M7-9;Q9Y6M7-6;Q9Y6M7-13;Q9Y6M7-12;Q9Y6M7;Q9Y6M7-8;Q9Y6M7-7;H7C3C4;Q9Y6M7-5	C9JRP1;E9PFN4;Q9Y6M7-11;Q9Y6M7-14;Q9Y6M7-10;Q9Y6M7-4;Q9Y6M7-3;Q9Y6M7-2;Q9Y6M7-9;Q9Y6M7-6;Q9Y6M7-13;Q9Y6M7-12;Q9Y6M7;Q9Y6M7-8;Q9Y6M7-7;H7C3C4;Q9Y6M7-5	3;3;3;3;3;3;3;3;3;3;3;3;3;3;3;2;2	3;3;3;3;3;3;3;3;3;3;3;3;3;3;3;2;2	3;3;3;3;3;3;3;3;3;3;3;3;3;3;3;2;2	11990000	0	0	Anion exchange protein;Sodium bicarbonate cotransporter 3	SLC4A7	;;;;;;;;;;;;;;;;	17	3	3	3	2	2	1	2	2	1	2	2	1	4.4	4.4	4.4	118.46	1051	1051;1210;463;467;574;1000;1018;1090;1095;1131;1135;1206;1214;1246;1259;801;800	1	16	0	4.5365	2.8	2.8	1.7	85334000	12490000	7949700	8073400	1	2	0	9
C9JRZ6;Q9NX63;F8WAR4;G3V1K1;F8WD73	C9JRZ6;Q9NX63;F8WAR4;G3V1K1	12;12;8;6;2	12;12;8;6;2	12;12;8;6;2	574400000	579870000	526440000	MICOS complex subunit MIC19	CHCHD3	;;;	5	12	12	12	10	10	10	10	10	10	10	10	10	51.3	51.3	51.3	26.694	232	232;227;241;138;63	1	133	0	46.904	37.9	40.9	40.9	7350900000	916540000	697360000	485380000	7	9	5	74
C9JS50;Q687X5;Q687X5-2	C9JS50;Q687X5;Q687X5-2	2;2;1	2;2;1	2;2;1	36732000	0	31471000	Metalloreductase STEAP4	STEAP4	;;	3	2	2	2	2	1	2	2	1	2	2	1	2	5.9	5.9	5.9	38.579	339	339;459;283	1	17	0.0029091	2.3283	5.9	2.9	5.9	316760000	40562000	25544000	27353000	2	0	0	5
C9JT64;C9J679;C9JN15;E9PG73;Q13427-2;Q13427	C9JT64;C9J679;C9JN15;E9PG73;Q13427-2;Q13427	1;1;1;1;1;1	1;1;1;1;1;1	1;1;1;1;1;1	0	0	21259000	Peptidyl-prolyl cis-trans isomerase;Peptidyl-prolyl cis-trans isomerase G	PPIG	;;;;;	6	1	1	1	1	1	1	1	1	1	1	1	1	20.3	20.3	20.3	6.6177	59	59;104;246;739;357;754	1	12	0.00026309	3.3349	20.3	20.3	20.3	233720000	18932000	21410000	18908000	0	1	0	8
C9JVN9;Q9H9P8-2;Q9H9P8	C9JVN9;Q9H9P8-2;Q9H9P8	3;3;3	3;3;3	3;3;3	29352000	0	0	L-2-hydroxyglutarate dehydrogenase, mitochondrial	L2HGDH	;;	3	3	3	3	3	2	3	3	2	3	3	2	3	8.6	8.6	8.6	48.475	441	441;441;463	1	36	0	5.5747	8.6	5.2	8.6	316010000	29260000	21665000	20622000	1	1	1	8
C9JXC6	C9JXC6	4	1	1	0	2130100	0		SEC61A1		1	4	1	1	4	4	2	1	1	0	1	1	0	52.5	11.9	11.9	10.817	101	101	1	2	0.0040418	2.1062	52.5	52.5	15.8	16089000	13695000	2393300	0	1	0	0	1
C9JYM0;O75817	C9JYM0;O75817	2;2	2;2	2;2	0	0	29480000	Ribonuclease P protein subunit p20	POP7	;	2	2	2	2	1	1	1	1	1	1	1	1	1	24.8	24.8	24.8	15.324	137	137;140	1	12	0	7.3632	10.9	10.9	10.9	240340000	21002000	24797000	26220000	1	1	1	11
C9JZ85;A8MV29;E7EU78;C9J1R1;Q9Y6K9;Q9Y6K9-2;F8W9A9;C9JN51;Q9Y6K9-3;C9J2V2;C9JH59	C9JZ85;A8MV29;E7EU78;C9J1R1;Q9Y6K9;Q9Y6K9-2;F8W9A9;C9JN51	5;5;5;5;5;5;4;3;2;1;1	5;5;5;5;5;5;4;3;2;1;1	5;5;5;5;5;5;4;3;2;1;1	65498000	0	71768000	NF-kappa-B essential modulator	IKBKG	;;;;;;;	11	5	5	5	4	4	4	4	4	4	4	4	4	36.3	36.3	36.3	21.653	190	190;411;412;418;419;487;368;250;320;195;205	1	50	0	8.7466	25.8	25.8	29.5	698630000	76124000	66583000	81553000	1	2	1	12
C9JZR2;O60716-5;O60716-3;O60716-2;O60716;O60716-8;O60716-7;O60716-6;O60716-4;O60716-21;O60716-19;O60716-18;O60716-17;O60716-13;O60716-11;O60716-10;O60716-9;O60716-24;O60716-23;O60716-22;O60716-20;O60716-16;O60716-15;O60716-14;O60716-12;O60716-29;O60716-27;O60716-26;O60716-25;O60716-32;O60716-31;O60716-30;O60716-28;E9PRE2;H0YC95;E9PKY0;E9PKL1	C9JZR2;O60716-5;O60716-3;O60716-2;O60716;O60716-8;O60716-7;O60716-6;O60716-4;O60716-21;O60716-19;O60716-18;O60716-17;O60716-13;O60716-11;O60716-10;O60716-9;O60716-24;O60716-23;O60716-22;O60716-20;O60716-16;O60716-15;O60716-14;O60716-12;O60716-29;O60716-27;O60716-26;O60716-25;O60716-32;O60716-31;O60716-30;O60716-28	22;22;22;22;22;21;21;21;21;20;20;20;20;20;20;20;20;19;19;19;19;19;19;19;19;14;14;14;14;13;13;13;13;6;2;2;1	22;22;22;22;22;21;21;21;21;20;20;20;20;20;20;20;20;19;19;19;19;19;19;19;19;14;14;14;14;13;13;13;13;6;2;2;1	22;22;22;22;22;21;21;21;21;20;20;20;20;20;20;20;20;19;19;19;19;19;19;19;19;14;14;14;14;13;13;13;13;6;2;2;1	669950000	645020000	646940000	Catenin delta-1	CTNND1	;;;;;;;;;;;;;;;;;;;;;;;;;;;;;;;;	37	22	22	22	18	20	21	18	20	21	18	20	21	33	33	33	104.85	938	938;933;939;962;968;912;918;941;947;832;838;861;867;879;885;908;914;811;817;840;846;858;864;887;893;610;616;639;645;589;595;618;624;261;123;126;128	1	296	0	194.51	25.7	29.2	30	7776100000	686740000	791820000	594840000	15	10	14	156
C9JZY6;P62256;H7C4M9;C9JZG9;P62256-2;C9J8Q9	C9JZY6;P62256;H7C4M9;C9JZG9;P62256-2	5;5;4;4;4;2	5;5;4;4;4;2	5;5;4;4;4;2	408640000	347220000	364360000	Ubiquitin-conjugating enzyme E2 H	UBE2H	;;;;	6	5	5	5	4	5	4	4	5	4	4	5	4	46.3	46.3	46.3	13.818	123	123;183;62;103;152;149	1	66	0	91.05	39	46.3	39	4215500000	407200000	445450000	339090000	4	3	3	38
D3YTI9;A2AB90;O15533-2;O15533;O15533-3;O15533-4;C9JA35	D3YTI9;A2AB90;O15533-2;O15533;O15533-3;O15533-4	8;8;8;8;8;4;3	8;8;8;8;8;4;3	8;8;8;8;8;4;3	845950000	937120000	923700000	Tapasin	TAPBP	;;;;;	7	8	8	8	7	8	7	7	8	7	7	8	7	26.8	26.8	26.8	47.551	448	448;466;412;448;504;361;192	1	146	0	47.199	24.6	26.8	25	10772000000	938440000	1094900000	641740000	9	9	8	107
D6R938;E9PBG7;E9PF82;Q13557-8;Q13557-12;Q13557-10;Q13557;Q13557-6;Q13557-11;Q13557-9;Q13557-5;Q13557-3;Q13557-4;H0Y9J2;H0Y9C2;H7BXS4;B7Z1Z6;Q9UQM7;Q9UQM7-2;E9PBE8;E7EQE4;D6RHX9;D6RFJ0;E7ERS6;E7ETC9;B4DVQ3;H7BZC6	D6R938;E9PBG7;E9PF82;Q13557-8;Q13557-12;Q13557-10;Q13557;Q13557-6;Q13557-11;Q13557-9;Q13557-5;Q13557-3;Q13557-4	14;14;14;14;14;14;14;14;14;13;13;13;13;6;6;4;3;3;3;2;2;1;1;1;1;1;1	14;14;14;14;14;14;14;14;14;13;13;13;13;6;6;4;3;3;3;2;2;1;1;1;1;1;1	10;10;10;10;10;10;10;10;10;9;9;9;9;6;4;0;0;0;0;0;0;0;0;0;0;0;0	368110000	313070000	307750000	Calcium/calmodulin-dependent protein kinase type II subunit delta	CAMK2D	;;;;;;;;;;;;	27	14	14	10	10	9	10	10	9	10	6	6	6	34.7	34.7	25.3	56.298	498	498;512;533;478;478;492;499;513;524;489;498;510;519;182;194;362;305;478;489;168;173;24;90;112;180;180;184	1	135	0	45.584	25.1	23.3	27.1	3814700000	358960000	310460000	255450000	6	5	5	50
D6R992;Q01201;D6RIV7	D6R992;Q01201	5;5;1	5;5;1	5;5;1	44331000	45567000	61183000	Transcription factor RelB	RELB	;	3	5	5	5	3	4	4	3	4	4	3	4	4	15.6	15.6	15.6	61.776	576	576;579;58	1	41	0	23.169	10.1	12.7	12.7	607360000	36118000	64178000	59466000	0	1	2	18
D6R9Z7;P15954	D6R9Z7;P15954	2;2	2;2	2;2	110900000	117700000	88282000	Cytochrome c oxidase subunit 7C, mitochondrial	COX7C	;	2	2	2	2	2	2	2	2	2	2	2	2	2	32.1	32.1	32.1	6.3824	56	56;63	1	34	0	5.0723	32.1	32.1	32.1	1268100000	129540000	97265000	98116000	1	0	1	12
D6RA70;Q9H6S0;D6RF50	D6RA70;Q9H6S0	6;6;1	6;6;1	6;6;1	27234000	33898000	31202000	Probable ATP-dependent RNA helicase YTHDC2	YTHDC2	;	3	6	6	6	4	2	3	4	2	3	4	2	3	11.5	11.5	11.5	82.988	739	739;1430;98	1	33	0	9.3091	8.7	3.8	5.4	302550000	28402000	16567000	19357000	1	2	2	12
D6RB81;Q9UHK6;Q9UHK6-5;V9GZ45;V9GYP4	D6RB81;Q9UHK6;Q9UHK6-5;V9GZ45;V9GYP4	3;3;3;2;2	3;3;3;2;2	3;3;3;2;2	43284000	0	45177000	Alpha-methylacyl-CoA racemase	AMACR	;;;;	5	3	3	3	2	1	2	2	1	2	2	1	2	10.6	10.6	10.6	40.674	367	367;382;394;260;288	1	30	0	8.8718	6.8	2.2	6.8	399250000	50830000	7669600	34618000	1	0	2	10
D6RB92;Q5JS54-3;Q5JS54;Q5JS54-2;D6REN3;E2QRC7;H7C465	D6RB92;Q5JS54-3;Q5JS54;Q5JS54-2;D6REN3;E2QRC7;H7C465	5;5;5;5;4;4;3	5;5;5;5;4;4;3	5;5;5;5;4;4;3	71975000	79640000	60957000	Proteasome assembly chaperone 4	PSMG4	;;;;;;	7	5	5	5	4	4	4	4	4	4	4	4	4	75.9	75.9	75.9	11.655	108	108;104;123;162;76;82;117	1	58	0	33.92	67.6	67.6	64.8	932570000	75060000	95698000	87890000	2	3	1	30
D6RBM3;D6RHU3;P55212	D6RBM3;D6RHU3;P55212	1;1;1	1;1;1	1;1;1	0	0	10882000	Caspase-6;Caspase-6 subunit p18;Caspase-6 subunit p11	CASP6	;;	3	1	1	1	0	1	1	0	1	1	0	1	1	12.5	12.5	12.5	9.3895	80	80;143;293	1	3	0.0097928	1.6877	0	12.5	12.5	21702000	0	9170900	9678500	0	1	0	1
D6RBW1;P06730;P06730-3;P06730-2;H0Y8J7;D6RHE2;H0Y8X3;A6NMX2	D6RBW1;P06730;P06730-3;P06730-2;H0Y8J7	6;6;6;6;3;1;1;1	6;6;6;6;3;1;1;1	6;6;6;6;3;1;1;1	294540000	329610000	387810000	Eukaryotic translation initiation factor 4E	EIF4E	;;;;	8	6	6	6	6	6	5	6	6	5	6	6	5	23.7	23.7	23.7	28.512	245	245;217;237;248;155;90;171;242	1	74	0	32.29	23.7	23.7	18	3732700000	394250000	334550000	277530000	2	3	4	37
D6RCM8;O95379-3;O95379-2;O95379;O95379-4	D6RCM8;O95379-3;O95379-2;O95379;O95379-4	3;3;3;3;3	3;3;3;3;3	3;3;3;3;3	0	0	92442000	Tumor necrosis factor alpha-induced protein 8	TNFAIP8	;;;;	5	3	3	3	2	2	2	2	2	2	2	2	2	15.5	15.5	15.5	23.257	200	200;188;190;198;210	1	29	0	6.4277	8.5	8.5	8.5	1029700000	99775000	92289000	70324000	0	0	1	10
D6RE58;D6RHG0;D6RB73;P78383;P78383-2	D6RE58;D6RHG0;D6RB73;P78383;P78383-2	1;1;1;1;1	1;1;1;1;1	1;1;1;1;1	0	10749000	0	Solute carrier family 35 member B1	SLC35B1	;;;;	5	1	1	1	1	1	0	1	1	0	1	1	0	5.3	5.3	5.3	20.803	187	187;248;254;322;359	1	11	0.0017606	2.7236	5.3	5.3	0	138510000	17143000	12077000	0	1	0	0	7
D6REA1;Q9H173;D6RIU8;D6R940;D6RG16;D6RBP7;D6RAI3	D6REA1;Q9H173	6;6;2;1;1;1;1	6;6;2;1;1;1;1	6;6;2;1;1;1;1	93459000	76202000	83416000	Nucleotide exchange factor SIL1	SIL1	;	7	6	6	6	5	4	4	5	4	4	5	4	4	19.9	19.9	19.9	52.748	468	468;461;163;94;123;123;125	1	49	0	20.774	12.4	15.2	9.4	1056500000	113670000	86053000	86292000	3	2	2	17
D6REK3;Q6UX04-2;Q6UX04	D6REK3;Q6UX04-2;Q6UX04	2;2;2	2;2;2	2;2;2	23199000	0	0	Peptidyl-prolyl cis-trans isomerase CWC27 homolog	CWC27	;;	3	2	2	2	2	0	1	2	0	1	2	0	1	7.6	7.6	7.6	42.996	381	381;390;472	1	13	0.0017469	2.6323	7.6	0	2.9	208390000	24016000	0	20169000	1	0	1	10
D6RER8;E7ESU6;D6RG31;D6RHF5;D6R9Q7;Q8NBW4-2;Q8NBW4-4;Q8NBW4-3;Q8NBW4	D6RER8;E7ESU6;D6RG31;D6RHF5;D6R9Q7;Q8NBW4-2;Q8NBW4-4;Q8NBW4-3;Q8NBW4	1;1;1;1;1;1;1;1;1	1;1;1;1;1;1;1;1;1	1;1;1;1;1;1;1;1;1	0	0	11590000	Sodium-coupled neutral amino acid transporter 9	SLC38A9	;;;;;;;;	9	1	1	1	1	0	1	1	0	1	1	0	1	25.5	25.5	25.5	11.365	102	102;131;187;397;455;462;498;498;561	1	5	0.0029275	2.3883	25.5	0	25.5	45152000	9766000	0	10308000	1	0	0	2
D6REX3;O94979-6;O94979-3;O94979-10;O94979-4;O94979-9;O94979-2;O94979;O94979-8;D6RHZ5;H7BXG7;O94979-7;O94979-5;H0YAB3;H0Y8V7;H0Y9T9;H0Y9K1;H0Y8W8;D6RE64;D6RCQ9;H0YAF5;D6RBT0;D6RHE8;H0Y9V3	D6REX3;O94979-6;O94979-3;O94979-10;O94979-4;O94979-9;O94979-2;O94979;O94979-8;D6RHZ5;H7BXG7;O94979-7;O94979-5	34;33;33;33;33;33;33;33;33;27;25;25;20;16;10;8;8;6;4;4;4;2;2;2	34;33;33;33;33;33;33;33;33;27;25;25;20;16;10;8;8;6;4;4;4;2;2;2	34;33;33;33;33;33;33;33;33;27;25;25;20;16;10;8;8;6;4;4;4;2;2;2	1621000000	1604000000	1420800000	Protein transport protein Sec31A	SEC31A	;;;;;;;;;;;;	24	34	34	34	29	28	26	29	28	26	29	28	26	35.9	35.9	35.9	136.22	1251	1251;1067;1106;1166;1181;1200;1205;1220;1233;877;969;969;509;443;285;235;237;383;164;166;181;81;92;219	1	420	0	96.617	30.5	27.3	23.7	18603000000	1735100000	1804100000	1263700000	22	19	12	206
D6RF62	D6RF62	17	1	1	0	0	7420300		PAICS		1	17	1	1	15	16	15	1	1	1	1	1	1	58.3	3	3	37.111	333	333	1	11	1	-2	49.2	49.5	46.5	183740000	15456000	18799000	6599700	0	0	0	1
D6RGG3;Q99715;Q99715-4;Q99715-2;H0Y5N9;H0Y4P7;H0Y991	D6RGG3;Q99715;Q99715-4	38;38;37;14;6;5;4	38;38;37;14;6;5;4	38;38;37;14;6;5;4	517240000	542100000	500470000	Collagen alpha-1(XII) chain	COL12A1	;;	7	38	38	38	27	27	24	27	27	24	27	27	24	17.2	17.2	17.2	333.2	3062	3062;3063;2987;1899;756;638;207	1	373	0	93.23	12.8	12.4	10.8	6513500000	487660000	621750000	433800000	11	13	8	127
D6RGI3;D6RER5;Q9NVA2;Q9NVA2-2;D6RDU5;H0Y961;B1AMS2;F5H1J5;Q14141-2;Q14141-4;Q14141;D6RDP1;D6R9Y6;B4E049;H0Y9G8;Q14141-3	D6RGI3;D6RER5;Q9NVA2;Q9NVA2-2;D6RDU5	16;16;16;15;13;7;7;7;7;7;7;6;6;6;3;2	16;16;16;15;13;7;7;7;7;7;7;6;6;6;3;2	13;13;13;12;10;6;5;5;5;5;5;6;6;4;3;1	458310000	579010000	553060000	Septin-11	11\Sep	;;;;	16	16	16	13	12	9	11	12	9	11	9	6	8	50.1	50.1	42.1	49.005	425	425;432;429;439;372;160;431;457;427;429;434;126;136;369;82;267	1	184	0	114.52	38.1	30.4	36	6945800000	695430000	660020000	521900000	11	7	9	112
D6RGY8;D6RFI3;E7EQR8;Q9GZM5;H0Y9A1	D6RGY8;D6RFI3;E7EQR8;Q9GZM5;H0Y9A1	3;3;3;3;2	3;3;3;3;2	3;3;3;3;2	60889000	67984000	58148000	Protein YIPF3;Protein YIPF3, 36 kDa form III	YIPF3	;;;;	5	3	3	3	3	2	2	3	2	2	3	2	2	39.4	39.4	39.4	12.29	109	109;262;356;350;135	1	28	0	10.979	39.4	29.4	29.4	710400000	83311000	67755000	41166000	3	1	1	13
D6RHW1;D6RIY1;D6RGK3;D6RIV9;D6RIE8;Q9HBM6;Q16594	D6RHW1;D6RIY1;D6RGK3;D6RIV9;D6RIE8;Q9HBM6;Q16594	2;2;2;2;2;2;2	2;2;2;2;2;2;2	2;2;2;2;2;2;2	0	16672000	0	Transcription initiation factor TFIID subunit 9B;Transcription initiation factor TFIID subunit 9	TAF9;TAF9B	;;;;;;	7	2	2	2	1	2	2	1	2	2	1	2	2	18.6	18.6	18.6	11.57	102	102;127;135;166;197;251;264	1	20	0.00025767	3.0517	10.8	18.6	18.6	157990000	7879700	18575000	10513000	1	2	2	15
D6RIE3;P14406;D6RGV5;H0UI06;D6R9C3;D6RA35	D6RIE3;P14406;D6RGV5;H0UI06	3;3;2;2;1;1	3;3;2;2;1;1	3;3;2;2;1;1	151240000	160210000	140750000	Cytochrome c oxidase subunit 7A2, mitochondrial	COX7A2	;;;	6	3	3	3	2	2	2	2	2	2	2	2	2	34.1	34.1	34.1	10.264	91	91;83;103;115;53;76	1	29	0	8.9087	25.3	25.3	25.3	1510800000	136130000	158540000	133140000	2	2	1	24
D6RIW8;Q9NW82	D6RIW8;Q9NW82	3;3	3;3	3;3	0	24871000	27248000	WD repeat-containing protein 70	WDR70	;	2	3	3	3	1	2	3	1	2	3	1	2	3	13.7	13.7	13.7	43.24	387	387;654	1	21	0	6.4632	3.1	6.2	13.7	223630000	13439000	27914000	26602000	1	1	2	15
D6RIY6;Q06265;Q06265-2;D6R905;Q06265-3;Q06265-4;D6RAP4;D6RA17;H0Y9L5	D6RIY6;Q06265;Q06265-2;D6R905;Q06265-3;Q06265-4	5;5;5;3;3;3;2;2;1	5;5;5;3;3;3;2;2;1	5;5;5;3;3;3;2;2;1	120460000	129800000	130010000	Exosome complex component RRP45	EXOSC9	;;;;;	9	5	5	5	5	5	4	5	5	4	5	5	4	14.4	14.4	14.4	46.977	423	423;439;456;226;355;372;86;242;172	1	57	0	12.491	14.4	14.4	10.6	1508100000	143430000	155010000	113710000	5	1	2	30
D6RIZ4;D6RA47;D6RE79;Q14728	D6RIZ4;D6RA47;D6RE79;Q14728	2;2;2;2	2;2;2;2	2;2;2;2	0	0	37451000	Major facilitator superfamily domain-containing protein 10	MFSD10	;;;	4	2	2	2	1	1	2	1	1	2	1	1	2	6.2	6.2	6.2	38.247	356	356;366;480;455	1	14	0	4.9466	2.5	2.5	6.2	209610000	17128000	17551000	33309000	0	0	0	3
E1P5H9;Q96BD0-3;Q96BD0-4;Q96BD0;Q96BD0-2	E1P5H9;Q96BD0-3;Q96BD0-4;Q96BD0	3;3;3;3;1	3;3;3;3;1	3;3;3;3;1	36988000	35764000	0	Solute carrier organic anion transporter family member 4A1	SLCO4A1	;;;	5	3	3	3	3	3	1	3	3	1	3	3	1	4.7	4.7	4.7	65.837	620	620;661;722;722;583	1	24	0.0002578	3.0569	4.7	4.7	1.8	328250000	43808000	43614000	9536700	1	2	0	7
E2QRB3;P32322-2;P32322;P32322-3;J3QR88;J3QLK9;J3QL23;J3QL32;J3QL24;J3KQ22;J3QKT4;J3KTA8;J3QKT3;J3QRZ0;J3KSA9	E2QRB3;P32322-2;P32322;P32322-3;J3QR88;J3QLK9;J3QL23;J3QL32;J3QL24;J3KQ22;J3QKT4	6;6;6;6;4;4;4;4;4;4;3;2;2;2;1	5;5;5;5;4;4;4;4;4;4;2;2;2;2;1	5;5;5;5;4;4;4;4;4;4;2;2;2;2;1	50131000	50859000	0	Pyrroline-5-carboxylate reductase 1, mitochondrial;Pyrroline-5-carboxylate reductase	PYCR1	;;;;;;;;;;	15	6	5	5	5	4	2	4	3	1	4	3	1	30.2	25.7	25.7	30.213	288	288;316;319;346;132;165;173;217;225;253;242;84;94;115;109	1	37	0	7.4162	26.7	20.8	10.8	666860000	71859000	65878000	23489000	1	2	0	18
E2QRF9;O75496;H7C608;C9K0U5	E2QRF9;O75496;H7C608	3;3;2;1	3;3;2;1	3;3;2;1	66766000	54640000	67705000	Geminin	GMNN	;;	4	3	3	3	3	2	3	3	2	3	3	2	3	29.6	29.6	29.6	20.539	179	179;209;102;65	1	27	0	14.272	29.6	17.3	29.6	528300000	89561000	45650000	54515000	3	2	2	16
E2QRH7;Q9NYP7;Q9NYP7-2;Q9NYP7-3	E2QRH7;Q9NYP7;Q9NYP7-2	3;3;3;1	3;3;3;1	3;3;3;1	222420000	138770000	177650000	Elongation of very long chain fatty acids protein 5	ELOVL5	;;	4	3	3	3	3	2	2	3	2	2	3	2	2	10.4	10.4	10.4	34.202	289	289;299;326;88	1	30	0	21.781	10.4	5.9	7.6	1665500000	202280000	94473000	119980000	2	1	1	8
E2QRM6;Q9H2U2;Q9H2U2-2;H0Y9D8;Q9H2U2-6;Q9H2U2-3;D6R967;D6RGV9;B4DFH3;Q9H2U2-4;D6RGI1;H0YAK2;D6RAD3	E2QRM6;Q9H2U2;Q9H2U2-2;H0Y9D8;Q9H2U2-6;Q9H2U2-3;D6R967	12;12;12;8;8;8;7;5;5;5;2;1;1	12;12;12;8;8;8;7;5;5;5;2;1;1	12;12;12;8;8;8;7;5;5;5;2;1;1	860220000	727310000	834270000	Inorganic pyrophosphatase 2, mitochondrial	PPA2	;;;;;;	13	12	12	12	10	12	10	10	12	10	10	12	10	48.7	48.7	48.7	35.731	316	316;334;349;226;232;305;191;195;202;168;88;69;113	1	193	0	41.836	39.9	48.7	41.5	9327800000	780740000	915070000	711960000	9	8	5	102
E5KLJ6;E5KLJ5;O60313;O60313-2;E5KLK1;E5KLJ9;H7C141;H7C321;C9JY58;C9JMB8	E5KLJ6;E5KLJ5;O60313;O60313-2;E5KLK1;E5KLJ9	15;15;15;15;14;14;3;2;1;1	15;15;15;15;14;14;3;2;1;1	15;15;15;15;14;14;3;2;1;1	200090000	199450000	180060000	Dynamin-like 120 kDa protein, mitochondrial;Dynamin-like 120 kDa protein, form S1	OPA1	;;;;;	10	15	15	15	11	12	7	11	12	7	11	12	7	19.1	19.1	19.1	113.49	978	978;1015;960;997;961;979;183;185;84;243	1	148	0	34.683	13.6	15.4	8.2	2391300000	232250000	217580000	108350000	7	5	2	54
E5RFP0;Q8WVJ2	E5RFP0;Q8WVJ2	4;4	4;4	4;4	0	0	121030000	NudC domain-containing protein 2	NUDCD2	;	2	4	4	4	3	3	3	3	3	3	3	3	3	36.4	36.4	36.4	14.745	132	132;157	1	40	0	9.5474	28.8	28.8	28.8	1217600000	96878000	92398000	95394000	2	2	2	24
E5RG17;Q6P1N9;G5EA19;U3KQS5;E5RGF2;Q6P1N9-2;H0YBX2;E5RG62;E5RK70;E5RH86	E5RG17;Q6P1N9;G5EA19;U3KQS5;E5RGF2;Q6P1N9-2;H0YBX2	5;5;4;4;4;4;3;2;2;1	5;5;4;4;4;4;3;2;2;1	5;5;4;4;4;4;3;2;2;1	90808000	72038000	71656000	Putative deoxyribonuclease TATDN1	TATDN1	;;;;;;	10	5	5	5	3	2	4	3	2	4	3	2	4	18.9	18.9	18.9	36.418	322	322;297;207;210;210;250;202;93;110;40	1	38	0	13.428	11.5	8.4	15.5	869500000	68073000	54072000	82435000	2	1	3	22
E5RGS9;Q9NRG0	E5RGS9;Q9NRG0	3;3	3;3	3;3	82917000	74607000	63590000	Chromatin accessibility complex protein 1	CHRAC1	;	2	3	3	3	3	3	3	3	3	3	3	3	3	58.9	58.9	58.9	6.2643	56	56;131	1	36	0	10.811	58.9	58.9	58.9	966490000	92686000	88711000	74335000	1	1	0	12
E5RGX5;Q93045;Q93045-2	E5RGX5;Q93045;Q93045-2	4;4;4	1;1;1	1;1;1	0	0	419900000	Stathmin;Stathmin-2	STMN2	;;	3	4	1	1	4	4	4	1	1	1	1	1	1	16.1	6	6	19.574	168	168;179;187	1	12	0	4.049	16.1	16.1	16.1	4931600000	4473900	461290000	373470000	0	0	1	4
E5RHG8;Q15369;Q15369-2;R4GMY8	E5RHG8;Q15369;Q15369-2;R4GMY8	6;6;5;3	6;6;5;3	6;6;5;3	1296800000	1298200000	1219400000	Transcription elongation factor B polypeptide 1	TCEB1	;;;	4	6	6	6	6	6	6	6	6	6	6	6	6	82	82	82	9.9601	89	89;112;96;65	1	117	0	131.97	82	82	82	15246000000	1414500000	1461100000	1181900000	8	7	6	93
E5RHV4;H0YAP1;E5RHR6;Q9Y5V0	E5RHV4;H0YAP1;E5RHR6;Q9Y5V0	1;1;1;1	1;1;1;1	1;1;1;1	16162000	0	0	Zinc finger protein 706	ZNF706	;;;	4	1	1	1	1	0	0	1	0	0	1	0	0	22.9	22.9	22.9	5.2721	48	48;51;53;76	1	7	0.0093843	1.7402	22.9	0	0	88855000	16836000	0	0	1	0	0	3
E5RHW4;O94905;E5RJ09;O94905-2;O94905-3	E5RHW4;O94905;E5RJ09	11;11;6;2;2	11;11;6;2;2	8;8;5;1;1	484840000	503350000	437950000	Erlin-2	ERLIN2	;;	5	11	11	8	10	11	10	10	11	10	7	8	7	39.3	39.3	30.2	37.725	338	338;339;197;152;206	1	133	0	75.507	34.3	39.3	34.3	5912000000	476880000	558950000	417380000	6	7	5	75
E5RHX8;Q9NPA8-2;Q9NPA8	E5RHX8;Q9NPA8-2;Q9NPA8	1;1;1	1;1;1	1;1;1	0	0	12561000	Transcription and mRNA export factor ENY2	ENY2	;;	3	1	1	1	1	1	1	1	1	1	1	1	1	17	17	17	11.315	100	100;96;101	1	11	0.00026413	3.3741	17	17	17	129500000	8977200	3034100	11172000	0	0	0	1
E5RIH5;Q6NXR4	E5RIH5;Q6NXR4	2;2	2;2	2;2	0	0	26503000	TELO2-interacting protein 2	TTI2	;	2	2	2	2	1	2	2	1	2	2	1	2	2	5	5	5	53.305	477	477;508	1	18	0.0069719	1.8998	2.9	5	5	203810000	15327000	28866000	23572000	0	0	1	4
E5RIM7;O00244;E5RGN3	E5RIM7;O00244;E5RGN3	4;4;3	4;4;3	4;4;3	389120000	295660000	263470000	Copper transport protein ATOX1	ATOX1	;;	3	4	4	4	3	3	3	3	3	3	3	3	3	71.2	71.2	71.2	7.8741	73	73;68;59	1	51	0	65.317	46.6	46.6	46.6	4345800000	430600000	332910000	138330000	3	4	2	40
E5RIP4;Q15043-2;Q15043-3;Q15043;E5RFZ8;E5RGA7;E5RJ40;E5RJG5	E5RIP4;Q15043-2;Q15043-3;Q15043;E5RFZ8;E5RGA7;E5RJ40;E5RJG5	3;3;3;3;2;2;2;2	3;3;3;3;2;2;2;2	3;3;3;3;2;2;2;2	412450000	394340000	415130000	Zinc transporter ZIP14	SLC39A14	;;;;;;;	8	3	3	3	3	3	2	3	3	2	3	3	2	29	29	29	17	155	155;481;492;492;89;90;122;127	1	53	0	78.962	29	29	20.6	5101500000	534030000	579960000	179970000	3	3	2	44
E5RIW3;E5RJD8;O75347;E5RHG6;B4DT30;E5RIX8	E5RIW3;E5RJD8;O75347;E5RHG6;B4DT30	10;10;10;8;7;3	10;10;10;8;7;3	10;10;10;8;7;3	1176800000	1385500000	1515900000	Tubulin-specific chaperone A	TBCA	;;;;	6	10	10	10	9	9	9	9	9	9	9	9	9	76.2	76.2	76.2	10.08	84	84;119;108;131;129;79	1	152	0	80.583	67.9	67.9	76.2	17443000000	1270300000	1474600000	1475500000	4	7	11	105
E5RJL4;F8WAR3;E5RJN3;Q6IBW4-5;Q6IBW4-2;Q6IBW4;Q6IBW4-4	E5RJL4;F8WAR3;E5RJN3;Q6IBW4-5;Q6IBW4-2;Q6IBW4;Q6IBW4-4	1;1;1;1;1;1;1	1;1;1;1;1;1;1	1;1;1;1;1;1;1	0	0	3710000	Condensin-2 complex subunit H2	NCAPH2	;;;;;;	7	1	1	1	0	0	1	0	0	1	0	0	1	23.7	23.7	23.7	4.3839	38	38;62;292;299;583;605;606	1	8	0.0029297	2.4059	0	0	23.7	63877000	0	0	3299700	0	0	0	2
E5RJR5;P63208;E7ERH2;F8W8N3;P63208-2;E5RGM3;E5RHM3;E5RGM4	E5RJR5;P63208;E7ERH2;F8W8N3;P63208-2	11;11;8;8;8;5;1;1	11;11;8;8;8;5;1;1	9;9;6;6;6;3;0;0	886450000	800100000	1043400000	S-phase kinase-associated protein 1	SKP1	;;;;	8	11	11	9	9	9	7	9	9	7	8	7	6	77.3	77.3	49.7	18.72	163	163;163;142;158;160;102;39;41	1	141	0	81.243	60.1	73	39.3	9500800000	1062300000	845790000	726250000	9	8	4	76
E7EM64;Q7L5N1;H7C3T0	E7EM64;Q7L5N1	12;12;3	12;12;3	12;12;3	623230000	619670000	616810000	COP9 signalosome complex subunit 6	COPS6	;	3	12	12	12	12	11	10	12	11	10	12	11	10	46.9	46.9	46.9	36.064	326	326;327;123	1	186	0	82.993	46.9	39.9	32.5	7663500000	742190000	684380000	456110000	9	10	3	91
E7EM96;E9PNR2;Q13671-2;Q13671	E7EM96;E9PNR2;Q13671-2;Q13671	2;2;2;2	2;2;2;2	2;2;2;2	0	0	16244000	Ras and Rab interactor 1	RIN1	;;;	4	2	2	2	1	1	2	1	1	2	1	1	2	4.5	4.5	4.5	65.396	605	605;617;721;783	1	17	0	6.5081	1.8	1.8	4.5	131980000	10392000	7979500	14447000	0	0	1	4
E7EMM4;Q13510;Q13510-2;E7ERV9;Q13510-3	E7EMM4;Q13510;Q13510-2;E7ERV9;Q13510-3	5;5;5;4;3	5;5;5;4;3	5;5;5;4;3	76997000	81634000	84928000	Acid ceramidase;Acid ceramidase subunit alpha;Acid ceramidase subunit beta	ASAH1	;;;;	5	5	5	5	3	3	4	3	3	4	3	3	4	18.1	18.1	18.1	41.796	370	370;395;411;305;389	1	50	0	7.6369	10.3	10.3	14.9	1009900000	54833000	67019000	76865000	0	1	0	19
E7EN19;E7ESS2;E7ENQ1;G3XAA2;H7C360;O95819-4;O95819-2;O95819-5;G5E948;O95819;O95819-3;E7EX83;C9J840;H7C0P6;Q9UKE5-7;Q9UKE5-3;Q9UKE5-4;Q9UKE5;F5H5M9;Q9UKE5-8;Q9UKE5-5;Q9UKE5-6;Q9UKE5-2;C9J338;F5H865;H7C3Z6;E7ETN6	E7EN19;E7ESS2;E7ENQ1;G3XAA2;H7C360;O95819-4;O95819-2;O95819-5;G5E948;O95819;O95819-3;E7EX83;C9J840;H7C0P6	17;17;16;16;16;16;16;16;15;15;15;12;12;10;6;6;6;6;5;5;5;5;5;4;4;2;1	17;17;16;16;16;16;16;16;15;15;15;12;12;10;6;6;6;6;5;5;5;5;5;4;4;2;1	10;10;9;9;9;9;9;9;8;8;8;7;7;7;0;0;0;0;0;0;0;0;0;0;0;1;0	188660000	188190000	183080000	Mitogen-activated protein kinase kinase kinase kinase 4	MAP4K4	;;;;;;;;;;;;;	27	17	17	10	13	10	11	13	10	11	7	7	7	17.6	17.6	13.1	144.92	1272	1272;1279;1154;1166;1170;1165;1211;1242;1320;1239;1319;1038;1042;1056;1297;1305;1352;1360;1312;1268;1276;1323;1331;350;1338;258;102	1	158	0	33.495	13.8	11	12.3	2379500000	223570000	188500000	157670000	3	5	6	58
E7ENC1;F8WBI9;E7ETT4;E7EUY3;E7ETT1;E9PDR0;C9JQS9;E7EX59;P05166;P05166-2;C9JVY9;E9PEC3;H7C5C9	E7ENC1;F8WBI9;E7ETT4;E7EUY3;E7ETT1;E9PDR0;C9JQS9;E7EX59;P05166;P05166-2;C9JVY9;E9PEC3	3;3;3;3;3;3;3;3;3;3;2;2;1	3;3;3;3;3;3;3;3;3;3;2;2;1	3;3;3;3;3;3;3;3;3;3;2;2;1	168400000	0	157370000	Propionyl-CoA carboxylase beta chain, mitochondrial	PCCB	;;;;;;;;;;;	13	3	3	3	2	1	2	2	1	2	2	1	2	14.2	14.2	14.2	32.468	303	303;405;482;516;520;550;559;570;539;559;191;423;163	1	28	0	4.5658	8.9	2.3	8.9	2695700000	191970000	149280000	107310000	1	0	1	7
E7ENU4;P55265;P55265-4;P55265-5;H0YCK3;P55265-3;P55265-2	E7ENU4;P55265;P55265-4;P55265-5;H0YCK3;P55265-3;P55265-2	22;22;22;21;20;20;20	22;22;22;21;20;20;20	22;22;22;21;20;20;20	354560000	423440000	359150000	Double-stranded RNA-specific adenosine deaminase	ADAR	;;;;;;	7	22	22	22	20	16	11	20	16	11	20	16	11	21.7	21.7	21.7	140.83	1269	1269;1226;1269;931;1195;1181;1200	1	221	0	65.971	20.3	16.1	12	4854200000	466110000	498530000	205480000	7	7	2	96
E7EP00;G5EA31;P53992;B4DZT4	E7EP00;G5EA31;P53992	17;17;17;6	17;17;17;6	17;17;17;6	435350000	410970000	412350000	Protein transport protein Sec24C	SEC24C	;;	4	17	17	17	15	15	16	15	15	16	15	15	16	25.3	25.3	25.3	106.62	975	975;1042;1094;342	1	211	0	57.178	22.3	21.8	23.4	5309700000	431990000	430960000	400820000	11	9	8	106
E7EP42;E9PB91;B1APJ0;O14925;Q5SRD1;H0Y6X5;S4R2X5	E7EP42;E9PB91;B1APJ0;O14925;Q5SRD1;H0Y6X5;S4R2X5	2;2;2;2;2;1;1	2;2;2;2;2;1;1	2;2;2;2;2;1;1	0	38845000	0	Mitochondrial import inner membrane translocase subunit Tim23;Putative mitochondrial import inner membrane translocase subunit Tim23B	TIMM23B;TIMM23	;;;;;;	7	2	2	2	1	2	0	1	2	0	1	2	0	49.6	49.6	49.6	12.701	123	123;161;172;209;257;107;118	1	18	0	13.733	16.3	49.6	0	229010000	11713000	47219000	0	1	2	0	7
E7EPB3;P50914	E7EPB3;P50914	6;6	6;6	6;6	2171400000	2247500000	2185100000	60S ribosomal protein L14	RPL14	;	2	6	6	6	6	6	6	6	6	6	6	6	6	44.4	44.4	44.4	14.558	124	124;215	1	111	0	14.814	44.4	44.4	44.4	27983000000	2609800000	2663600000	1899800000	7	7	5	66
E7EPN9;Q9Y520-6;Q9Y520-4;Q9Y520-5;Q9Y520;Q9Y520-7;Q9Y520-3;Q9Y520-2;H7C5N8	E7EPN9;Q9Y520-6;Q9Y520-4;Q9Y520-5;Q9Y520;Q9Y520-7;Q9Y520-3;Q9Y520-2	29;29;29;29;29;29;27;26;7	29;29;29;29;29;29;27;26;7	28;28;28;28;28;28;26;26;7	598620000	677230000	638180000	Protein PRRC2C	PRRC2C	;;;;;;;	9	29	29	28	23	24	23	23	24	23	22	23	22	13.7	13.7	13.4	308.77	2819	2819;2752;2817;2849;2896;2898;2700;2653;1300	1	307	0	46.98	10.7	10.6	11	7414300000	667360000	793270000	598250000	10	14	11	120
E7EPT4;P19404	E7EPT4;P19404	2;2	2;2	2;2	0	29000000	0	NADH dehydrogenase [ubiquinone] flavoprotein 2, mitochondrial	NDUFV2	;	2	2	2	2	1	2	1	1	2	1	1	2	1	9.1	9.1	9.1	27.907	252	252;249	1	12	0	4.7897	5.2	9.1	5.2	204330000	18548000	32584000	15153000	0	0	1	2
E7EPV7;P37840-2;P37840;P37840-3;D6RA31;Q16143	E7EPV7;P37840-2;P37840;P37840-3;D6RA31	6;6;6;4;3;1	6;6;6;4;3;1	6;6;6;4;3;1	645190000	632290000	573420000	Alpha-synuclein	SNCA	;;;;	6	6	6	6	6	6	6	6	6	6	6	6	6	60	60	60	11.777	115	115;112;140;126;66;134	1	105	0	177.22	60	60	60	8305400000	789870000	656950000	518030000	4	5	6	63
E7EPW2;B4DQG6;B4DFJ5;P82663	E7EPW2;B4DQG6;B4DFJ5;P82663	3;3;3;3	3;3;3;3	3;3;3;3	50773000	49764000	40108000	28S ribosomal protein S25, mitochondrial	MRPS25	;;;	4	3	3	3	3	2	2	3	2	2	3	2	2	38.2	38.2	38.2	12.946	110	110;129;145;173	1	32	0	12.479	38.2	22.7	27.3	665250000	57134000	34016000	35256000	1	0	1	9
E7EQ69;Q9GZZ1;C9J5D1;Q9GZZ1-2;B0AZT5;C9JZU6;C9J5J3;F8WCK0	E7EQ69;Q9GZZ1;C9J5D1;Q9GZZ1-2;B0AZT5	12;12;10;8;6;4;4;3	12;12;10;8;6;4;4;3	12;12;10;8;6;4;4;3	178820000	179650000	206940000	N-alpha-acetyltransferase 50	NAA50	;;;;	8	12	12	12	9	9	7	9	9	7	9	9	7	64.3	64.3	64.3	19.311	168	168;169;129;81;95;57;58;48	1	100	0	39.767	57.7	57.7	35.1	2297600000	228230000	231900000	211990000	5	5	5	47
E7EQJ3;H0YBZ8;E7ESL3;H0YBZ2;P04233-3;P04233-2;P04233	E7EQJ3;H0YBZ8;E7ESL3;H0YBZ2;P04233-3;P04233-2;P04233	1;1;1;1;1;1;1	1;1;1;1;1;1;1	1;1;1;1;1;1;1	0	0	20314000	HLA class II histocompatibility antigen gamma chain	CD74	;;;;;;	7	1	1	1	1	0	1	1	0	1	1	0	1	11.5	11.5	11.5	13.917	122	122;145;152;316;160;232;296	1	10	0.0024564	2.48	11.5	0	11.5	199760000	21484000	0	18068000	0	0	1	1
E7EQS0;P20839;P20839-3;P20839-7;P20839-5;P20839-6;C9K0R9;C9J381;P20839-2;P20839-4	E7EQS0;P20839;P20839-3;P20839-7;P20839-5;P20839-6;C9K0R9;C9J381;P20839-2;P20839-4	4;4;4;4;4;4;3;3;3;3	3;3;3;3;3;3;2;2;2;2	3;3;3;3;3;3;2;2;2;2	47909000	57050000	0	Inosine-5-monophosphate dehydrogenase 1;Inosine-5-monophosphate dehydrogenase	IMPDH1	;;;;;;;;;	10	4	3	3	2	3	2	2	2	2	2	2	2	10.9	9.4	9.4	57.015	530	530;514;563;566;589;599;289;513;489;509	1	28	0	13.961	7.4	8.9	4.5	544600000	46300000	52704000	41691000	1	3	1	15
E7EQT3;E7ETM3;Q9BY07-6;Q9BY07-5;Q9BY07-7;Q9BY07-4;Q9BY07-8;Q9BY07-3;Q9BY07;Q9BY07-2	E7EQT3;E7ETM3;Q9BY07-6;Q9BY07-5;Q9BY07-7;Q9BY07-4;Q9BY07-8;Q9BY07-3;Q9BY07;Q9BY07-2	1;1;1;1;1;1;1;1;1;1	1;1;1;1;1;1;1;1;1;1	1;1;1;1;1;1;1;1;1;1	0	0	9554900	Anion exchange protein;Electrogenic sodium bicarbonate cotransporter 4	SLC4A5	;;;;;;;;;	10	1	1	1	1	1	1	1	1	1	1	1	1	0.7	0.7	0.7	105.59	963	963;993;968;993;1019;1040;1067;1121;1137;1143	1	9	1	-2	0.7	0.7	0.7	78187000	9411000	9780500	8498200	0	0	0	0
E7ER68;Q658Y4;G3V120	E7ER68;Q658Y4;G3V120	4;4;3	4;4;3	4;4;3	0	29781000	0	Protein FAM91A1	FAM91A1	;;	3	4	4	4	1	3	1	1	3	1	1	3	1	6.7	6.7	6.7	88.986	789	789;838;218	1	15	0	5.3422	1.4	4.8	1.4	184680000	14631000	33461000	19803000	1	0	0	4
E7ER89;O95340;O95340-2	E7ER89;O95340;O95340-2	7;7;7	7;7;7	7;7;7	177780000	163450000	178310000	Bifunctional 3-phosphoadenosine 5-phosphosulfate synthase 2;Sulfate adenylyltransferase;Adenylyl-sulfate kinase	PAPSS2	;;	3	7	7	7	6	5	7	6	5	7	6	5	7	15	15	15	69.997	618	618;614;619	1	110	0	17.752	12.8	11	15	1782800000	191230000	138290000	140260000	1	2	3	38
E7ERB7;B7ZLZ0;Q9P107;K7EJC2	E7ERB7;B7ZLZ0;Q9P107	5;5;5;2	5;5;5;2	5;5;5;2	41833000	0	0	GEM-interacting protein	GMIP	;;	4	5	5	5	4	2	3	4	2	3	4	2	3	7.1	7.1	7.1	103.7	941	941;944;970;303	1	27	0	8.3469	5.5	2.7	4.9	275760000	53612000	29204000	25041000	3	0	1	12
E7ERH3;Q68CZ2-2;Q68CZ2;Q68CZ2-4;Q68CZ2-3;C9JHU5;E9PCX8;C9JWN9;C9JTD0	E7ERH3;Q68CZ2-2;Q68CZ2;Q68CZ2-4;Q68CZ2-3;C9JHU5;E9PCX8	6;6;6;4;4;3;3;2;2	6;6;6;4;4;3;3;2;2	6;6;6;4;4;3;3;2;2	64611000	69041000	67201000	Tensin-3	TNS3	;;;;;;	9	6	6	6	5	4	3	5	4	3	5	4	3	8.5	8.5	8.5	129.07	1205	1205;1205;1445;250;391;544;1249;108;138	1	57	0	12.711	6.1	4.9	5.4	798210000	74208000	93242000	50779000	1	3	2	17
E7ERI8;E7EW49;F5H604;E3W994;J3KR49;O75122;E9PBA6;F5H3X0;H7C4X8;H7C5M8;H7C4I5;B3KR06;E7ENG2;O75122-2;C9J668;D6RBU8	E7ERI8;E7EW49;F5H604;E3W994;J3KR49;O75122;E9PBA6;F5H3X0	15;15;15;14;13;13;12;11;4;3;2;2;2;2;1;1	15;15;15;14;13;13;12;11;4;3;2;2;2;2;1;1	11;11;11;10;9;9;8;8;3;2;2;2;2;2;1;1	159360000	157060000	146970000	CLIP-associating protein 2	CLASP2	;;;;;;;	16	15	15	11	8	7	11	8	7	11	5	3	8	12.1	12.1	9.5	165.63	1513	1513;1514;1505;1273;1293;1294;995;1063;184;220;205;454;458;431;178;233	1	136	0	27.081	6.9	5.4	9.4	1717900000	153210000	137840000	152820000	5	5	3	58
E7ERK9;Q9UI10-3;Q9UI10;Q9UI10-2;H7C2L8;F8W8L6	E7ERK9;Q9UI10-3;Q9UI10;Q9UI10-2;H7C2L8	4;4;4;4;2;1	4;4;4;4;2;1	4;4;4;4;2;1	39071000	52053000	37092000	Translation initiation factor eIF-2B subunit delta	EIF2B4	;;;;	6	4	4	4	3	3	3	3	3	3	3	3	3	13.6	13.6	13.6	59.714	544	544;522;523;543;194;235	1	35	0	13.158	10.1	10.1	11.2	496280000	43558000	58082000	41626000	1	2	2	18
E7ERS3;Q86VM9-2;Q86VM9	E7ERS3;Q86VM9-2;Q86VM9	2;2;2	2;2;2	2;2;2	0	0	10645000	Zinc finger CCCH domain-containing protein 18	ZC3H18	;;	3	2	2	2	0	1	1	0	1	1	0	1	1	3.2	3.2	3.2	108.94	977	977;757;953	1	7	0.00051125	2.9215	0	1.8	1.8	64701000	0	11151000	9467500	0	0	0	3
E7ES43;O95757;E9PDE8;D6RJ96	E7ES43;O95757;E9PDE8;D6RJ96	30;30;28;17	26;26;24;13	26;26;24;13	769620000	790000000	828190000	Heat shock 70 kDa protein 4L	HSPA4L	;;;	4	30	26	26	22	22	27	18	18	23	18	18	23	44.3	38.4	38.4	97.658	870	870;839;813;531	1	283	0	206.48	33	33.2	39.1	9110700000	740690000	796920000	902730000	14	12	10	145
E7ESC6;E9PEN8;Q9UIA9;E5RIW1;H0YBE1	E7ESC6;E9PEN8;Q9UIA9	19;19;19;6;4	19;19;19;6;4	18;18;18;6;4	328100000	287260000	305520000	Exportin-7	XPO7	;;	5	19	19	18	14	15	10	14	15	10	13	14	9	20.7	20.7	19.7	124.07	1088	1088;1096;1087;237;190	1	181	0	45.01	14.6	16.1	10.2	3891800000	327060000	359810000	282350000	11	7	7	82
E7ESD5;E9PLN6;F2Z2Y1;O95677-5;O95677-2;O95677-4;O95677	E7ESD5;E9PLN6;F2Z2Y1;O95677-5;O95677-2;O95677-4;O95677	1;1;1;1;1;1;1	1;1;1;1;1;1;1	1;1;1;1;1;1;1	0	0	9931700	Eyes absent homolog;Eyes absent homolog 4	EYA4	;;;;;;	7	1	1	1	1	1	1	1	1	1	1	1	1	2.8	2.8	2.8	61.993	570	570;616;645;585;616;639;639	1	10	0	3.8373	2.8	2.8	2.8	101040000	11385000	10068000	8833400	1	0	1	8
E7ESK6;E9PBI9;P34741;E5RJB8;E5RHU3	E7ESK6;E9PBI9;P34741;E5RJB8;E5RHU3	2;2;2;1;1	2;2;2;1;1	2;2;2;1;1	0	36883000	0	Syndecan;Syndecan-2	SDC2	;;;;	5	2	2	2	1	2	1	1	2	1	1	2	1	14.5	14.5	14.5	18.388	165	165;172;201;137;145	1	18	0.00026035	3.2032	5.5	14.5	9.1	318420000	23044000	41643000	17867000	0	0	0	5
E7ESM9;P20810-9;P20810-7;P20810-6;P20810-5;F8W7E0;H0YA91;E9PSG1	E7ESM9;P20810-9;P20810-7;P20810-6;P20810-5	40;40;40;40;39;18;14;12	1;1;1;1;1;1;1;1	1;1;1;1;1;1;1;1	0	0	27760000	Calpastatin	CAST	;;;;	8	40	1	1	33	39	37	1	1	1	1	1	1	60.7	1.2	1.2	82.436	769	769;750;772;791;756;393;301;304	1	5	1	-2	57.3	60.2	59.2	27840000	754170	568050	24690000	0	0	1	1
E7ESP4;E7EMF1;E9PB77;D6RG08	E7ESP4;E7EMF1;E9PB77	26;22;15;3	1;1;1;0	1;1;1;0	139830000	216320000	0		ITGA2	;;	4	26	1	1	24	24	23	1	1	1	1	1	1	37.9	2.1	2.1	102.83	942	942;815;641;175	1	24	0	83.367	35.2	34.7	33.5	2067700000	153440000	236090000	52950000	1	2	1	20
E7EST9;B5MEG5;O94966-7;O94966-6;O94966-5;E7ESU0;O94966-4;O94966-3;O94966;O94966-2	E7EST9;B5MEG5;O94966-7;O94966-6;O94966-5;E7ESU0;O94966-4;O94966-3;O94966	6;6;6;6;6;5;5;5;5;2	6;6;6;6;6;5;5;5;5;2	6;6;6;6;6;5;5;5;5;2	28877000	0	24064000	Ubiquitin carboxyl-terminal hydrolase;Ubiquitin carboxyl-terminal hydrolase 19	USP19	;;;;;;;;	10	6	6	6	3	2	4	3	2	4	3	2	4	6.1	6.1	6.1	145.56	1321	1321;1358;1372;1384;1419;1089;1268;1281;1318;660	1	33	0	4.2529	2.8	2.1	4.2	220210000	21192000	15716000	20309000	1	0	1	7
E7ESZ7;O95299;Q8WXC9;C9J6X0;H7C2W5;H7C1Y7;H7C2X4;Q8N1B9	E7ESZ7;O95299;Q8WXC9;C9J6X0	5;5;5;3;2;2;2;2	5;5;5;3;2;2;2;2	5;5;5;3;2;2;2;2	0	74859000	65949000	NADH dehydrogenase [ubiquinone] 1 alpha subcomplex subunit 10, mitochondrial	NDUFA10	;;;	8	5	5	5	1	2	2	1	2	2	1	2	2	21	21	21	44.738	390	390;355;429;244;129;133;138;201	1	34	0	22.919	5.6	8.7	8.7	710410000	24511000	49871000	43639000	1	2	2	17
E7ET49;Q8NCG7-2;Q8NCG7-4;Q8NCG7;B4DVJ1;E7EVQ4	E7ET49;Q8NCG7-2;Q8NCG7-4;Q8NCG7	5;5;5;5;2;2	5;5;5;5;2;2	5;5;5;5;2;2	47752000	49168000	36572000	Sn1-specific diacylglycerol lipase beta	DAGLB	;;;	6	5	5	5	4	3	4	4	3	4	4	3	4	11.4	11.4	11.4	68.951	631	631;391;543;672;220;379	1	43	0	8.7351	9.7	6.8	8.6	467340000	54444000	53488000	34005000	2	2	3	21
E7ETB3;Q9ULA0;E7EPX3;B9ZVU2;F8WAN0;C9JBE1;E7EMB6;E5RJ35;C9JRG3;C9J1E2	E7ETB3;Q9ULA0;E7EPX3;B9ZVU2;F8WAN0;C9JBE1;E7EMB6	5;5;4;4;4;4;3;2;2;2	5;5;4;4;4;4;3;2;2;2	5;5;4;4;4;4;3;2;2;2	0	55684000	93323000	Aspartyl aminopeptidase	DNPEP	;;;;;;	10	5	5	5	2	3	4	2	3	4	2	3	4	12.6	12.6	12.6	54.53	493	493;475;224;270;273;331;410;89;117;137	1	49	0	9.8983	4.9	8.1	10.1	778730000	40218000	61672000	69234000	0	1	2	18
E7ETK0;P62847-2;P62847-3;P62847;P62847-4	E7ETK0;P62847-2;P62847-3;P62847;P62847-4	6;6;6;6;6	6;6;6;6;6	6;6;6;6;6	2146200000	1925100000	2115800000	40S ribosomal protein S24	RPS24	;;;;	5	6	6	6	5	6	6	5	6	6	5	6	6	41.2	41.2	41.2	15.197	131	131;130;132;133;289	1	153	0	43.261	35.9	41.2	41.2	24631000000	2130000000	1982900000	2236600000	11	13	11	138
E7ETU5;B4DN88;P29558-2;P29558;E7EPF2;C9J9B2;J3QT21;C9JIJ9;Q6XE24-3;Q6XE24-4;Q6XE24-5;Q6XE24-2;Q6XE24	E7ETU5;B4DN88;P29558-2;P29558;E7EPF2	3;3;3;3;2;1;1;1;1;1;1;1;1	3;3;3;3;2;1;1;1;1;1;1;1;1	2;2;2;2;1;1;1;1;1;1;1;1;1	84972000	100070000	101900000	RNA-binding motif, single-stranded-interacting protein 1	RBMS1	;;;;	13	3	3	2	3	3	3	3	3	3	2	2	2	10.8	10.8	8.1	40.147	370	370;419;403;406;127;264;434;436;419;420;421;433;437	1	41	0	6.6767	10.8	10.8	10.8	1253600000	81755000	128670000	100050000	2	2	1	19
E7ETY4;E9PC69;Q7KZI7-10;Q7KZI7-13;Q7KZI7-7;Q7KZI7-2;Q7KZI7-15;Q7KZI7-5;Q7KZI7-16;Q7KZI7-4;Q7KZI7-9;Q7KZI7-12;Q7KZI7-14;Q7KZI7-3;Q7KZI7-6;Q7KZI7-11;Q7KZI7-8;Q7KZI7	E7ETY4;E9PC69;Q7KZI7-10;Q7KZI7-13;Q7KZI7-7;Q7KZI7-2;Q7KZI7-15;Q7KZI7-5;Q7KZI7-16;Q7KZI7-4;Q7KZI7-9;Q7KZI7-12;Q7KZI7-14;Q7KZI7-3;Q7KZI7-6;Q7KZI7-11;Q7KZI7-8;Q7KZI7	5;5;5;5;5;5;5;5;5;5;5;5;5;5;5;5;5;5	5;5;5;5;5;5;5;5;5;5;5;5;5;5;5;5;5;5	5;5;5;5;5;5;5;5;5;5;5;5;5;5;5;5;5;5	0	29918000	0	Serine/threonine-protein kinase MARK2	MARK2	;;;;;;;;;;;;;;;;;	18	5	5	5	3	3	2	3	3	2	3	3	2	9.7	9.7	9.7	78.452	699	699;778;686;691;692;701;709;719;724;725;734;740;745;746;755;773;779;788	1	37	0	6.8757	5.3	5.3	2.9	359450000	24945000	34637000	13163000	0	1	0	5
E7ETY7;Q8TED1	E7ETY7;Q8TED1	4;4	4;4	4;4	102170000	114860000	110180000	Glutathione peroxidase;Probable glutathione peroxidase 8	GPX8	;	2	4	4	4	4	4	4	4	4	4	4	4	4	29.1	29.1	29.1	18.09	158	158;209	1	60	0	6.1534	29.1	29.1	29.1	1374300000	123030000	110660000	90169000	3	1	1	19
E7ETZ4;Q9Y6E2;B5MCH7;B5MCE7;Q75MG1;E7EMS9;E9PFD4;C9JF98;F8WDX8	E7ETZ4;Q9Y6E2;B5MCH7;B5MCE7;Q75MG1	17;17;14;11;11;7;6;6;6	16;16;13;10;11;7;6;6;6	16;16;13;10;11;7;6;6;6	884160000	831250000	903580000	Basic leucine zipper and W2 domain-containing protein 2	BZW2	;;;;	9	17	16	16	14	17	15	13	16	14	13	16	14	39.7	38	38	46.913	408	408;419;343;225;274;208;161;162;170	1	235	0	89.148	31.1	39.7	35.8	11283000000	1013300000	1107000000	918160000	8	10	8	108
E7EU23;P50395;P50395-2;Q5SX87;V9GYF8;Q5SX90;Q5SX86;Q5SX91;V9GYJ7	E7EU23;P50395;P50395-2;Q5SX87	32;32;28;16;10;10;10;10;9	32;32;28;16;10;10;10;10;9	22;22;20;9;5;5;6;5;4	7401300000	6570000000	6792400000	Rab GDP dissociation inhibitor beta	GDI2	;;;	9	32	32	22	29	26	25	29	26	25	20	20	19	79.7	79.7	56.8	51.18	449	449;445;400;263;130;148;155;203;125	1	513	0	323.31	73.5	66.8	69	81876000000	7966700000	6612400000	6641700000	29	17	30	311
E7EU96;P68400;Q8NEV1;P68400-2;V9GYA2;V9GY80;V9GYW6	E7EU96;P68400;Q8NEV1;P68400-2	15;15;12;10;2;2;1	15;15;12;10;2;2;1	15;15;12;10;2;2;1	517270000	550660000	558290000	Casein kinase II subunit alpha;Casein kinase II subunit alpha 3	CSNK2A1;CSNK2A3	;;;	7	15	15	15	10	12	10	10	12	10	10	12	10	53.2	53.2	53.2	45.31	385	385;391;391;255;74;79;27	1	158	0	135.21	35.6	46.2	39.2	6210600000	457350000	726330000	372220000	8	9	5	82
E7EUI7;E7EMN6;P41236;Q6NXS1	E7EUI7;E7EMN6;P41236;Q6NXS1	4;4;4;2	4;4;4;2	4;4;4;2	75610000	78767000	69571000	Protein phosphatase inhibitor 2;Protein phosphatase inhibitor 2-like protein 3	PPP1R2;PPP1R2P3	;;;	4	4	4	4	3	3	3	3	3	3	3	3	3	70	70	70	8.9811	80	80;170;205;205	1	42	0	7.886	58.8	58.8	58.8	853650000	75878000	83564000	61982000	2	2	1	24
E7EUM5;Q7Z3B4-3;Q7Z3B4;Q7Z3B4-2	E7EUM5;Q7Z3B4-3;Q7Z3B4;Q7Z3B4-2	8;8;8;7	8;8;8;7	8;8;8;7	54531000	62079000	78356000	Nucleoporin p54	NUP54	;;;	4	8	8	8	5	3	5	5	3	5	5	3	5	30	30	30	37.349	327	327;459;507;291	1	61	0	12.331	19	12.5	19.3	856010000	61085000	46576000	82658000	2	2	2	21
E7EV46;Q03468;D6R9X7	E7EV46;Q03468;D6R9X7	2;2;1	2;2;1	2;2;1	14221000	0	0	DNA excision repair protein ERCC-6	ERCC6-PGBD3;ERCC6	;;	3	2	2	2	2	1	1	2	1	1	2	1	1	2.4	2.4	2.4	119.49	1061	1061;1493;179	1	15	0.001757	2.6961	2.4	1.2	1.2	98526000	14814000	9131300	4804200	1	0	1	8
E7EV99;E7ENY0;P35611-2;P35611-4;A2A3N8;P35611;P35611-3;H0Y9H2;H0YFD8;D6RF25	E7EV99;E7ENY0;P35611-2;P35611-4;A2A3N8;P35611;P35611-3;H0Y9H2	3;3;3;3;3;3;3;2;1;1	3;3;3;3;3;3;3;2;1;1	3;3;3;3;3;3;3;2;1;1	27798000	0	0	Alpha-adducin	ADD1	;;;;;;;	10	3	3	3	2	1	2	2	1	2	2	1	2	7	7	7	70.055	632	632;663;631;662;662;737;768;444;105;142	1	21	0.0002681	3.5565	4.1	2.5	4.4	302400000	28958000	22057000	23953000	1	0	0	2
E7EVA0;P27816;P27816-6;P27816-2;B9ZVR1;P27816-5;E9PGM5;P27816-4;B5MEG9;H7C4C5;H0Y2V1;B4DSQ1;H7C456;P27816-7	E7EVA0;P27816;P27816-6;P27816-2;B9ZVR1;P27816-5	49;43;42;35;27;26;22;21;17;15;12;9;8;3	49;43;42;35;27;26;22;21;17;15;12;9;8;3	37;31;30;23;17;16;10;10;9;5;0;0;8;3	2272600000	2734500000	2546700000	Microtubule-associated protein;Microtubule-associated protein 4	MAP4	;;;;;	14	49	49	37	40	39	44	40	39	44	30	29	32	25.9	25.9	20.3	245.44	2297	2297;1152;1135;979;811;809;887;872;711;493;463;249;290;99	1	598	0	249.84	22.5	20.3	22.9	31132000000	2389000000	3175400000	2441100000	27	29	34	314
E7EVC7;Q676U5-3;Q676U5-2;Q676U5;Q676U5-5;C9J8C6;C9JAY7;C9J1B2;Q676U5-4	E7EVC7;Q676U5-3;Q676U5-2;Q676U5;Q676U5-5	6;6;6;6;4;1;1;1;1	6;6;6;6;4;1;1;1;1	6;6;6;6;4;1;1;1;1	23192000	28905000	0	Autophagy-related protein 16-1	ATG16L1	;;;;	9	6	6	6	3	2	3	3	2	3	3	2	3	18.3	18.3	18.3	70.01	624	624;470;588;607;444;55;164;187;428	1	29	0	11.098	7.7	6.9	8.7	354080000	25035000	20731000	40288000	1	2	1	10
E7EVD1;O43395;B4DSY9	E7EVD1;O43395	8;8;3	8;8;3	8;8;3	93400000	100570000	108100000	U4/U6 small nuclear ribonucleoprotein Prp3	PRPF3	;	3	8	8	8	6	5	6	6	5	6	6	5	6	18.9	18.9	18.9	72.075	634	634;683;281	1	65	0	15.072	15.1	12.1	13.1	1206200000	100180000	88835000	94644000	3	5	2	25
E7EVH9;Q08623-2;Q08623-3;Q08623;Q08623-4	E7EVH9;Q08623-2;Q08623-3;Q08623;Q08623-4	1;1;1;1;1	1;1;1;1;1	1;1;1;1;1	0	0	20289000	Pseudouridine-5-phosphatase	HDHD1	;;;;	5	1	1	1	1	1	1	1	1	1	1	1	1	6.3	6.3	6.3	21.466	191	191;185;208;228;251	1	11	0	10.817	6.3	6.3	6.3	170300000	24370000	19124000	18045000	1	1	0	4
E7EVL4;Q9H490-2;Q9H490	E7EVL4;Q9H490-2;Q9H490	2;2;2	2;2;2	2;2;2	0	59407000	0	Phosphatidylinositol glycan anchor biosynthesis class U protein	PIGU	;;	3	2	2	2	1	2	1	1	2	1	1	2	1	6.4	6.4	6.4	48.22	423	423;415;435	1	25	0	10.442	2.4	6.4	2.4	434980000	15331000	65918000	12588000	0	2	0	11
E7EVQ6;Q14534;H0YBN7;E5RJH9	E7EVQ6;Q14534	7;7;2;1	7;7;2;1	7;7;2;1	184580000	148690000	154380000	Squalene monooxygenase	SQLE	;	4	7	7	7	4	6	5	4	6	5	4	6	5	22.5	22.5	22.5	53.067	479	479;574;163;184	1	68	0	27.219	14	19.8	17.1	1920500000	124970000	181490000	141110000	2	3	3	36
E7EVX8;Q8WWY3;Q8WWY3-2;E7ESA8;E7EU94;E7ESX0;E7EN72;Q8WWY3-3	E7EVX8;Q8WWY3;Q8WWY3-2;E7ESA8;E7EU94;E7ESX0;E7EN72	10;10;6;6;5;5;5;4	10;10;6;6;5;5;5;4	10;10;6;6;5;5;5;4	96677000	116920000	121550000	U4/U6 small nuclear ribonucleoprotein Prp31	PRPF31	;;;;;;	8	10	10	10	6	8	6	6	8	6	6	8	6	35.5	35.5	35.5	54.766	493	493;499;364;450;260;276;284;278	1	82	0	20.081	19.3	27.2	20.1	1351600000	97889000	166310000	115180000	1	1	3	39
E7EVY3;H0Y9H6;H0YD33	E7EVY3;H0Y9H6;H0YD33	32;26;21	1;1;1	1;1;1	0	0	22318000		CAST	;;	3	32	1	1	26	31	30	1	1	1	1	1	1	58.2	3.2	3.2	74.918	693	693;465;450	1	13	0.0069946	1.9214	54.5	57.6	56.6	235020000	13758000	21354000	19850000	0	0	0	3
E7EW05;Q9NVU7;Q9NVU7-2	E7EW05;Q9NVU7;Q9NVU7-2	6;6;5	6;6;5	6;6;5	55083000	108090000	258960000	Protein SDA1 homolog	SDAD1	;;	3	6	6	6	3	4	3	3	4	3	3	4	3	9.1	9.1	9.1	75.44	650	650;687;590	1	54	0	5.9794	4.9	6.3	5.1	1571500000	27163000	57371000	216770000	2	4	1	18
E7EW20;Q9UM54-5;Q9UM54-2;Q9UM54-6;Q9UM54-4;Q9UM54-1;Q9UM54	E7EW20;Q9UM54-5;Q9UM54-2;Q9UM54-6;Q9UM54-4;Q9UM54-1;Q9UM54	5;5;5;5;5;5;5	5;5;5;5;5;5;5	5;5;5;5;5;5;5	0	164940000	182600000	Unconventional myosin-VI	MYO6	;;;;;;	7	5	5	5	3	4	2	3	4	2	3	4	2	4.7	4.7	4.7	148.83	1286	1286;1253;1262;1285;1285;1285;1294	1	31	0	7.7861	3.2	3.9	2	1340400000	34642000	70666000	49219000	1	1	1	11
E7EW40;Q9H3H5-3;Q9H3H5-2;Q9H3H5	E7EW40;Q9H3H5-3;Q9H3H5-2;Q9H3H5	1;1;1;1	1;1;1;1	1;1;1;1	0	0	10351000	UDP-N-acetylglucosamine--dolichyl-phosphate N-acetylglucosaminephosphotransferase	DPAGT1	;;;	4	1	1	1	1	1	1	1	1	1	1	1	1	3.4	3.4	3.4	37.209	327	327;301;400;408	1	13	0.005174	1.995	3.4	3.4	3.4	130370000	10548000	10824000	9205900	1	0	1	9
E7EW69;B5ME97;Q9P0V9-3;Q9P0V9;Q9P0V9-2;E7EX04;B7Z371;B7Z277;C9JEQ7;F5H1W3;F8WC85;C9JEW2;C9JNR7;F5H1F2	E7EW69;B5ME97;Q9P0V9-3;Q9P0V9;Q9P0V9-2;E7EX04;B7Z371;B7Z277	13;13;13;13;13;12;8;7;2;1;1;1;1;1	12;12;12;12;12;11;7;6;2;1;1;1;1;1	12;12;12;12;12;11;7;6;2;1;1;1;1;1	445780000	396240000	393860000	Septin-10	10\Sep	;;;;;;;	14	13	12	12	10	8	11	9	7	10	9	7	10	42.2	38	38	52.145	450	450;544;431;454;503;473;321;283;97;38;48;57;61;98	1	151	0	116	34	27.3	38.2	5003400000	440800000	391800000	344640000	6	3	5	78
E7EWK3;Q9H2U1-3;Q9H2U1;F5GZS0;Q9H2U1-2	E7EWK3;Q9H2U1-3;Q9H2U1;F5GZS0;Q9H2U1-2	9;9;9;8;8	9;9;9;8;8	8;8;8;7;7	104700000	96370000	85531000	ATP-dependent RNA helicase DHX36	DHX36	;;;;	5	9	9	8	5	5	7	5	5	7	5	5	6	17.3	17.3	16.2	91.43	797	797;979;1008;994;994	1	68	0	32.257	9	11.2	12.9	1144500000	71908000	105350000	109040000	2	2	5	24
E7EWM1	E7EWM1	1	1	1	0	0	30679000		NCOA2		1	1	1	1	1	1	1	1	1	1	1	1	1	1.3	1.3	1.3	102.73	946	946	1	10	1	-2	1.3	1.3	1.3	343230000	25252000	41331000	27286000	1	0	0	3
E7EX17;P23588;B4DS13;F8VX11;F8VSC7;F8VP89;F8W0K0;F8VYE9;F8VRU1	E7EX17;P23588;B4DS13;F8VX11	22;22;21;11;9;9;7;6;5	22;22;21;11;9;9;7;6;5	22;22;21;11;9;9;7;6;5	1027200000	1112700000	1116900000	Eukaryotic translation initiation factor 4B	EIF4B	;;;	9	22	22	22	21	22	17	21	22	17	21	22	17	39.9	39.9	39.9	69.697	616	616;611;572;360;227;275;169;185;175	1	278	0	136.38	38.5	39.9	31.5	13653000000	1173100000	1448200000	1102600000	15	14	10	130
E7EX90;Q14203-3;Q14203-4;Q14203-6;Q14203;Q14203-5;Q14203-2;Q6AWB1;E7EWF7;C9JZA4;C9JTE5;C9JJN7;C9JJD0;C9JKG6;E9PCY0;C9J1B7	E7EX90;Q14203-3;Q14203-4;Q14203-6;Q14203;Q14203-5;Q14203-2;Q6AWB1	29;29;29;29;29;27;27;16;9;2;2;2;2;2;2;1	29;29;29;29;29;27;27;16;9;2;2;2;2;2;2;1	29;29;29;29;29;27;27;16;9;2;2;2;2;2;2;1	565360000	606140000	589730000	Dynactin subunit 1	DCTN1;DKFZp686E0752	;;;;;;;	16	29	29	29	20	18	20	20	18	20	20	18	20	32.2	32.2	32.2	139.09	1256	1256;1236;1253;1271;1278;1139;1144;890;191;76;76;87;121;135;186;64	1	284	0	105.33	22	20.3	20.4	6985100000	676270000	522820000	495750000	9	15	11	132
E9PAU2;Q8IY67-2;Q8IY67;K7EKR9;Q8IY67-3	E9PAU2;Q8IY67-2;Q8IY67	10;10;9;3;2	10;10;9;3;2	10;10;9;3;2	133280000	166670000	160620000	Ribonucleoprotein PTB-binding 1	RAVER1	;;	5	10	10	10	8	7	5	8	7	5	8	7	5	25.3	25.3	25.3	79.578	756	756;739;606;96;75	1	93	0	47.226	21.4	16.8	13.1	1860400000	173950000	204920000	115260000	7	6	3	41
E9PAV3;F8VZJ2;H0YHX9;Q13765;E9PAV3-2;F8W1N5;F8VNW4;F8W0W4;F8VZ58;Q9BZK3	E9PAV3;F8VZJ2;H0YHX9;Q13765;E9PAV3-2;F8W1N5;F8VNW4;F8W0W4	6;5;5;5;5;4;4;4;2;1	6;5;5;5;5;4;4;4;2;1	6;5;5;5;5;4;4;4;2;1	2725800000	2582500000	2408100000	Nascent polypeptide-associated complex subunit alpha, muscle-specific form;Nascent polypeptide-associated complex subunit alpha	NACA	;;;;;;;	10	6	6	6	5	6	6	5	6	6	5	6	6	3.4	3.4	3.4	205.42	2078	2078;136;213;215;925;71;148;198;126;213	1	105	0	131.7	2.7	3.4	3.4	31939000000	2844500000	3139300000	2342100000	6	7	6	78
E9PC74;Q13144;C9JRD9	E9PC74;Q13144	8;8;1	8;8;1	8;8;1	74288000	72455000	65112000	Translation initiation factor eIF-2B subunit epsilon	EIF2B5	;	3	8	8	8	5	5	3	5	5	3	5	5	3	16	16	16	78.346	705	705;721;107	1	44	0	12.837	11.8	8.8	8.7	858300000	75020000	140440000	37250000	2	4	0	17
E9PCY4;P61962;P61962-2	E9PCY4;P61962	3;3;1	3;3;1	3;3;1	0	0	44168000	DDB1- and CUL4-associated factor 7	DCAF7	;	3	3	3	3	2	1	2	2	1	2	2	1	2	21.2	21.2	21.2	19.258	165	165;342;142	1	21	0	4.8509	17	9.1	17	440740000	98792000	40022000	39283000	1	1	0	9
E9PD53;Q9NTJ3;Q9NTJ3-2;C9JR83;C9J578;C9JVD8;C9J9E4;C9JWF0;C9IYK2;C9JJ64;F8WCB7	E9PD53;Q9NTJ3;Q9NTJ3-2	34;34;31;12;5;4;4;2;2;2;1	34;34;31;12;5;4;4;2;2;2;1	34;34;31;12;5;4;4;2;2;2;1	696410000	701540000	718620000	Structural maintenance of chromosomes protein;Structural maintenance of chromosomes protein 4	SMC4	;;	11	34	34	34	22	24	21	22	24	21	22	24	21	31.3	31.3	31.3	144.45	1263	1263;1288;1230;423;139;119;157;170;173;180;50	1	315	0	172.17	20.3	21.4	18.1	8793800000	738930000	807890000	658610000	9	14	9	133
E9PDM3;P31641;C9JPV1;F8WF95;P31641-2	E9PDM3;P31641;C9JPV1;F8WF95;P31641-2	2;2;1;1;1	2;2;1;1;1	2;2;1;1;1	48950000	55589000	49169000	Sodium- and chloride-dependent taurine transporter;Transporter	SLC6A6	;;;;	5	2	2	2	2	2	2	2	2	2	2	2	2	7.2	7.2	7.2	40.516	359	359;620;109;112;200	1	23	0	9.2191	7.2	7.2	7.2	578820000	50024000	65015000	42158000	0	1	1	11
E9PDN5;P11532-3;P11532-2;P11532-4;P11532;E7EQS5;F8VX32;E7ESB2;H0Y304;P11532-8;P11532-7;P11532-5;P11532-6;F5GZY3;E7EQR9;P11532-10;P11532-9;H0Y3E8	E9PDN5;P11532-3;P11532-2;P11532-4;P11532;E7EQS5;F8VX32;E7ESB2;H0Y304;P11532-8;P11532-7;P11532-5;P11532-6;F5GZY3;E7EQR9;P11532-10;P11532-9	5;5;5;5;5;4;4;4;4;4;4;4;4;3;3;3;3;2	5;5;5;5;5;4;4;4;4;4;4;4;4;3;3;3;3;2	5;5;5;5;5;4;4;4;4;4;4;4;4;3;3;3;3;2	87051000	73999000	65073000	Dystrophin	DMD	;;;;;;;;;;;;;;;;	18	5	5	5	4	4	3	4	4	3	4	4	3	1.6	1.6	1.6	426.02	3681	3681;2341;2344;3677;3685;1225;1230;1243;1386;604;617;622;635;1115;1133;507;525;238	1	47	0	12.017	1.4	1.4	1.1	927430000	111500000	96795000	33005000	2	2	1	27
E9PE17;I3L0E3;Q9Y2R5	E9PE17;I3L0E3;Q9Y2R5	2;2;2	2;2;2	2;2;2	31895000	0	0	28S ribosomal protein S17, mitochondrial	MRPS17;hCG_1984214	;;	3	2	2	2	2	1	1	2	1	1	2	1	1	22.5	22.5	22.5	14.374	129	129;225;130	1	17	0	6.3481	22.5	7	7	359460000	34477000	30019000	21908000	1	1	0	13
E9PEM5;F5H1X8;P50851-2;P50851;H0YAC6;Q5T321;F5GXV7;Q8NFP9;H0Y9N9	E9PEM5;F5H1X8;P50851-2;P50851	20;20;20;19;8;2;2;2;1	20;20;20;19;8;2;2;2;1	20;20;20;19;8;2;2;2;1	165070000	185990000	190370000	Lipopolysaccharide-responsive and beige-like anchor protein	LRBA	;;;	9	20	20	20	15	11	8	15	11	8	15	11	8	9.4	9.4	9.4	286.97	2575	2575;2852;2851;2863;1505;2943;2946;2946;134	1	144	0	25.868	7	5.3	4.1	1932200000	169400000	166780000	97802000	4	5	3	34
E9PES6;E7ES08;E7EQU1;O15347	E9PES6;E7ES08;E7EQU1;O15347	5;5;5;5	5;5;5;5	5;5;5;5	157340000	168330000	226490000	High mobility group protein B3	HMGB3	;;;	4	5	5	5	3	3	4	3	3	4	3	3	4	26.8	26.8	26.8	17.522	153	153;188;193;200	1	49	0	8.3469	26.1	26.1	26.8	2073600000	155850000	173910000	158400000	1	1	2	20
E9PF18;Q16836;Q16836-3;Q16836-2	E9PF18;Q16836;Q16836-3;Q16836-2	12;12;12;12	12;12;12;12	12;12;12;12	987860000	780510000	830210000	Hydroxyacyl-coenzyme A dehydrogenase, mitochondrial	HADH	;;;	4	12	12	12	8	8	10	8	8	10	8	8	10	50.3	50.3	50.3	35.236	318	318;314;331;390	1	137	0	87.444	33.3	34	39.3	10663000000	952430000	765840000	815360000	7	6	6	76
E9PF19;Q9Y4P3;C9JVF0;F8WCR3;F8WDI9	E9PF19;Q9Y4P3;C9JVF0	12;12;6;2;2	12;12;6;2;2	12;12;6;2;2	220840000	184420000	198920000	Transducin beta-like protein 2	TBL2	;;	5	12	12	12	10	9	10	10	9	10	10	9	10	38	38	38	45.935	411	411;447;270;107;176	1	109	0	66.103	32.4	28.7	32.4	2528800000	295050000	206740000	223100000	8	4	8	58
E9PFH1;P61587	E9PFH1;P61587	1;1	1;1	1;1	0	0	20248000	Rho-related GTP-binding protein RhoE	RND3	;	2	1	1	1	0	0	1	0	0	1	0	0	1	11.3	11.3	11.3	12.679	115	115;244	1	1	0.0044928	2.0432	0	0	11.3	18009000	0	0	18009000	0	0	1	1
E9PFK9;E7ERJ8;Q9UJ41-2;Q9UJ41-4;Q9UJ41-3;Q9UJ41	E9PFK9;E7ERJ8;Q9UJ41-2;Q9UJ41-4;Q9UJ41-3;Q9UJ41	4;4;4;4;4;4	4;4;4;4;4;4	4;4;4;4;4;4	31087000	0	37551000	Rab5 GDP/GTP exchange factor	RABGEF1	;;;;;	6	4	4	4	2	1	2	2	1	2	2	1	2	10.9	10.9	10.9	58.394	504	504;531;491;505;531;708	1	23	0	6.0627	3.8	2	6	307730000	30382000	19948000	26524000	1	1	2	10
E9PFQ4;Q86SQ0-2;Q86SQ0-3;Q86SQ0;G5E9V3;E9PGF6;E9PDY7	E9PFQ4;Q86SQ0-2;Q86SQ0-3;Q86SQ0;G5E9V3;E9PGF6	4;4;4;4;2;2;1	4;4;4;4;2;2;1	4;4;4;4;2;2;1	46202000	28788000	38742000	Pleckstrin homology-like domain family B member 2	PHLDB2	;;;;;	7	4	4	4	3	4	4	3	4	4	3	4	4	5.4	5.4	5.4	125.47	1115	1115;1210;1237;1253;581;744;519	1	32	0	7.3495	4.3	5.4	5.4	421000000	56201000	56416000	52672000	1	1	1	10
E9PFR3;Q14738-3;Q14738-2;Q14738;H0Y8C4;H7C5Q9;H0YJ35;Q15173-2;Q15173	E9PFR3;Q14738-3;Q14738-2;Q14738;H0Y8C4	11;11;11;11;9;4;1;1;1	11;11;11;11;9;4;1;1;1	6;6;6;6;5;2;0;0;0	219410000	225080000	225130000	Serine/threonine-protein phosphatase 2A 56 kDa regulatory subunit delta isoform	PPP2R5D	;;;;	9	11	11	6	10	10	8	10	10	8	5	5	5	25.9	25.9	13.8	69.116	594	594;496;570;602;504;154;71;494;497	1	116	0	27.286	24.1	21.7	19	2508100000	245080000	285040000	140580000	6	4	2	49
E9PFT7;P25054-2;P25054;D6RFL6;E7EMH9;B7Z2B6	E9PFT7;P25054-2;P25054;D6RFL6;E7EMH9;B7Z2B6	2;2;2;1;1;1	2;2;2;1;1;1	2;2;2;1;1;1	0	6280100	0	Adenomatous polyposis coli protein	APC	;;;;;	6	2	2	2	1	1	1	1	1	1	1	1	1	1.3	1.3	1.3	145.69	1304	1304;2742;2843;118;287;1135	1	8	1	-2	0.6	0.6	0.7	147430000	3790900	7056200	3325000	0	0	0	4
E9PFW2;O00462	E9PFW2;O00462	3;3	3;3	3;3	0	0	24382000	Beta-mannosidase	MANBA	;	2	3	3	3	1	0	2	1	0	2	1	0	2	4.5	4.5	4.5	94.411	822	822;879	1	12	0.00076065	2.828	1.2	0	3.3	204160000	4036900	0	20332000	0	0	1	4
E9PFW3;Q96CW1-2;Q96CW1;C9JJ47;C9JTK4;C9JGT8;C9JJD3;C9JPV8;H7C4C3	E9PFW3;Q96CW1-2;Q96CW1;C9JJ47	20;20;20;12;9;9;8;8;3	20;20;20;12;9;9;8;8;3	20;20;20;12;9;9;8;8;3	1055600000	1010100000	1114800000	AP-2 complex subunit mu	AP2M1	;;;	9	20	20	20	18	16	17	18	16	17	18	16	17	50	50	50	52.303	460	460;433;435;252;160;195;113;136;122	1	286	0	139.95	47	38.9	44.6	12216000000	1095400000	1120900000	1025300000	11	11	10	144
E9PG35;E9PHF7;Q96RQ3;F5GYT8;G5E9X5	E9PG35;E9PHF7;Q96RQ3;F5GYT8;G5E9X5	5;5;5;4;3	5;5;5;4;3	5;5;5;4;3	45851000	51273000	71729000	Methylcrotonoyl-CoA carboxylase subunit alpha, mitochondrial	MCCC1	;;;;	5	5	5	5	4	2	3	4	2	3	4	2	3	13.2	13.2	13.2	66.467	598	598;616;725;426;434	1	38	0	9.4439	11	4.8	8.9	622640000	52210000	45304000	52547000	0	1	2	11
E9PG39;E9PC15;Q53H12	E9PG39;E9PC15;Q53H12	4;4;4	4;4;4	4;4;4	85516000	106090000	122180000	Acylglycerol kinase, mitochondrial	AGK	;;	3	4	4	4	4	3	4	4	3	4	4	3	4	23.8	23.8	23.8	26.925	244	244;394;422	1	51	0	35.826	23.8	20.5	23.8	1153900000	104800000	119860000	108630000	2	1	1	18
E9PG40;P05067-7;P05067-11;P05067-8;P05067-9;P05067;H7C104;H7C0V9;E9PEV0;P05067-10;P05067-3;P05067-4;P05067-5;P05067-6;H7C2L2	E9PG40;P05067-7;P05067-11;P05067-8;P05067-9;P05067;H7C104;H7C0V9;E9PEV0;P05067-10;P05067-3;P05067-4;P05067-5;P05067-6	5;5;5;5;5;5;4;4;4;4;4;4;4;4;1	5;5;5;5;5;5;4;4;4;4;4;4;4;4;1	5;5;5;5;5;5;4;4;4;4;4;4;4;4;1	46071000	70242000	52338000	Amyloid beta A4 protein;N-APP;Soluble APP-alpha;Soluble APP-beta;C99;Beta-amyloid protein 42;Beta-amyloid protein 40;C83;P3(42);P3(40);C80;Gamma-secretase C-terminal fragment 59;Gamma-secretase C-terminal fragment 57;Gamma-secretase C-terminal fragment 50;C31	APP	;;;;;;;;;;;;;	15	5	5	5	2	5	4	2	5	4	2	5	4	8	8	8	80.832	714	714;733;746;751;752;770;280;485;660;639;677;695;696;714;181	1	53	0	7.3811	2.5	8	5.6	730340000	39265000	94479000	41664000	1	2	0	16
E9PGC0;P20936-2;B4DTL2;P20936;Q68CU6	E9PGC0;P20936-2;B4DTL2;P20936	4;4;4;4;1	4;4;4;4;1	4;4;4;4;1	24243000	0	0	Ras GTPase-activating protein 1	RASA1	;;;	5	4	4	4	4	1	0	4	1	0	4	1	0	5.3	5.3	5.3	101.79	881	881;870;880;1047;539	1	28	0	4.8972	5.3	1.2	0	183580000	31336000	5314700	0	2	0	0	9
E9PGM1;C9J987	E9PGM1	58;1	1;1	0;0	24638000	22286000	25978000		EIF4G1		2	58	1	0	47	52	50	1	1	1	0	0	0	42	1.5	0	166.75	1513	1513;92	1	16	0	5.2453	36.6	38.9	37.6	182860000	23828000	24806000	24859000	1	3	1	8
E9PGT3;Q15418-3;E9PRI4;Q15418;Q15418-2;B7Z3B5;F2Z2J1;Q15349;Q15349-3;Q15349-2;E9PMM7;Q5SVM7;Q5SVM6;E9PAN7	E9PGT3;Q15418-3;E9PRI4;Q15418;Q15418-2	14;14;14;14;14;4;4;4;4;4;3;3;3;2	10;10;10;10;10;1;1;1;1;1;1;2;3;1	10;10;10;10;10;1;1;1;1;1;1;2;3;1	143710000	141750000	119420000	Ribosomal protein S6 kinase;Ribosomal protein S6 kinase alpha-1	RPS6KA1	;;;;	14	14	10	10	9	12	10	7	8	6	7	8	6	24.9	18.9	18.9	81.471	724	724;643;719;735;744;644;758;733;741;758;112;115;166;204	1	99	0	21.786	14.8	21.1	17.5	1692700000	92417000	132100000	92172000	3	3	1	37
E9PGT6;Q99627-2;Q99627;H7C3S9;B8ZZP3	E9PGT6;Q99627-2;Q99627;H7C3S9;B8ZZP3	5;5;5;4;4	5;5;5;4;4	5;5;5;4;4	250100000	212370000	259100000	COP9 signalosome complex subunit 8	COPS8	;;;;	5	5	5	5	4	5	5	4	5	5	4	5	5	42.2	42.2	42.2	19.344	173	173;160;209;83;206	1	60	0	80.939	36.4	42.2	42.2	2805200000	242870000	195190000	181010000	2	3	3	34
E9PH64;E7EWZ0;E9PF49;Q9Y6M9	E9PH64;E7EWZ0;E9PF49;Q9Y6M9	3;3;3;3	3;3;3;3	3;3;3;3	39725000	48894000	48479000	NADH dehydrogenase [ubiquinone] 1 beta subcomplex subunit 9	NDUFB9	;;;	4	3	3	3	3	3	2	3	3	2	3	3	2	19	19	19	20.383	168	168;178;221;179	1	29	0	5.2292	19	19	13.7	626720000	44469000	66843000	35741000	1	2	0	13
E9PHA2;Q15003;C9J470;Q15003-2;C9JZP1;H7C415	E9PHA2;Q15003;C9J470;Q15003-2	16;16;14;12;6;2	16;16;14;12;6;2	16;16;14;12;6;2	192870000	190880000	253110000	Condensin complex subunit 2	NCAPH	;;;	6	16	16	16	9	12	10	9	12	10	9	12	10	30.3	30.3	30.3	81.572	730	730;741;607;605;216;182	1	122	0	26.419	16	21.6	16.6	2293900000	186520000	245390000	189730000	2	5	6	47
E9PHH9;Q9BUI4	E9PHH9;Q9BUI4	1;1	1;1	1;1	19493000	21021000	0	DNA-directed RNA polymerase III subunit RPC3	POLR3C	;	2	1	1	1	1	1	1	1	1	1	1	1	1	4.1	4.1	4.1	46.189	411	411;534	1	25	0	13.245	4.1	4.1	4.1	260680000	25929000	23490000	13087000	3	2	2	23
E9PHV4;O15514	E9PHV4;O15514	1;1	1;1	1;1	0	0	11308000	DNA-directed RNA polymerase II subunit RPB4	POLR2D	;	2	1	1	1	1	1	1	1	1	1	1	1	1	18.2	18.2	18.2	12.777	110	110;142	1	9	0.00075911	2.8049	18.2	18.2	18.2	88207000	9527000	13287000	10057000	1	1	1	6
E9PHY8;Q8NDA8;Q8NDA8-3;Q8NDA8-2	E9PHY8;Q8NDA8;Q8NDA8-3;Q8NDA8-2	2;2;1;1	2;2;1;1	2;2;1;1	0	0	7575900	Maestro heat-like repeat-containing protein family member 1	MROH1	;;;	4	2	2	2	1	1	1	1	1	1	1	1	1	1.3	1.3	1.3	180.28	1632	1632;1641;615;1147	1	13	0.008072	1.805	0.7	0.7	0.7	77583000	9606800	7289500	6738100	0	0	0	3
E9PI68;Q15005;E9PL01;E9PRB9;H0YE04	E9PI68;Q15005;E9PL01;E9PRB9	10;10;9;5;3	10;10;9;5;3	10;10;9;5;3	995480000	928120000	954460000	Signal peptidase complex subunit 2	SPCS2	;;;	5	10	10	10	9	10	9	9	10	9	9	10	9	43.6	43.6	43.6	28.503	257	257;226;157;87;166	1	163	0	151.27	39.3	43.6	39.3	11757000000	1068200000	1088400000	652440000	6	7	7	101
E9PIE3;Q969G5	E9PIE3;Q969G5	6;6	6;6	6;6	159930000	184230000	171110000	Protein kinase C delta-binding protein	PRKCDBP	;	2	6	6	6	5	5	6	5	5	6	5	5	6	21.5	21.5	21.5	31.088	293	293;261	1	77	0	31.726	19.1	18.1	21.5	1826400000	173820000	252260000	190910000	3	4	3	35
E9PJ55;Q9NUJ3;R4GNF5;E9PP52;E9PMB0;E7EN41	E9PJ55;Q9NUJ3	3;3;1;1;1;1	3;3;1;1;1;1	3;3;1;1;1;1	27843000	0	21239000	T-complex protein 11-like protein 1	TCP11L1	;	6	3	3	3	2	2	3	2	2	3	2	2	3	6.6	6.6	6.6	67.238	595	595;509;106;144;154;374	1	28	0	12.224	4.9	4.9	6.6	274110000	26593000	12819000	19011000	2	2	3	17
E9PJ81;Q04323;Q04323-2;E9PRQ7;E9PS08	E9PJ81;Q04323;Q04323-2;E9PRQ7	9;9;9;8;1	9;9;9;8;1	9;9;9;8;1	679700000	657360000	560220000	UBX domain-containing protein 1	UBXN1	;;;	5	9	9	9	8	9	8	8	9	8	8	9	8	40	40	40	32.611	290	290;297;312;293;100	1	122	0	316.62	30	40	37.2	7527300000	1008700000	844190000	505610000	5	7	5	60
E9PJB8;Q6GYA4;E9PN30;Q9BQE4	E9PJB8;Q6GYA4;E9PN30;Q9BQE4	1;1;1;1	1;1;1;1	1;1;1;1	0	0	15568000	Selenoprotein S	VIMP;SELS	;;;	4	1	1	1	1	1	1	1	1	1	1	1	1	7.2	7.2	7.2	18.494	166	166;187;218;189	1	11	0.0076318	1.8419	7.2	7.2	7.2	142870000	12070000	15727000	13847000	1	1	0	3
E9PJF0;E9PQW4;P27361-3;P27361;P27361-2;E9PBK7;B3KR49;H0YDH9;H0YEX6;E9PRH7;K7ELV1;K7EN18	E9PJF0;E9PQW4;P27361-3;P27361;P27361-2;E9PBK7;B3KR49	8;8;8;8;7;5;4;2;1;1;1;1	4;4;4;4;3;2;1;0;1;1;0;0	4;4;4;4;3;2;1;0;1;1;0;0	79606000	63574000	77251000	Mitogen-activated protein kinase;Mitogen-activated protein kinase 3	MAPK3	;;;;;;	12	8	4	4	7	7	6	3	3	3	3	3	3	34.5	19.9	19.9	35.737	316	316;339;357;379;335;311;265;87;121;136;233;281	1	49	0	17.534	27.2	27.2	27.2	958940000	65094000	74547000	76287000	0	1	1	14
E9PJK1;E9PRJ8;H0YDL9;H0YDJ9;E9PIF1;A6NMH8;P60033;E9PM31;H0YEE2	E9PJK1;E9PRJ8;H0YDL9;H0YDJ9;E9PIF1;A6NMH8;P60033;E9PM31;H0YEE2	2;2;2;2;2;2;2;1;1	2;2;2;2;2;2;2;1;1	2;2;2;2;2;2;2;1;1	104430000	88527000	112310000	Tetraspanin;CD81 antigen	CD81	;;;;;;;;	9	2	2	2	2	2	2	2	2	2	2	2	2	26.1	26.1	26.1	17.963	165	165;209;221;225;242;274;236;92;148	1	33	0	104.03	26.1	26.1	26.1	1285500000	128880000	109340000	111360000	2	2	2	18
E9PK54	E9PK54	14	1	1	177710000	156480000	146520000		HSPA8		1	14	1	1	14	14	14	1	1	1	1	1	1	82	6.6	6.6	19.955	183	183	1	24	0.0042715	2.0935	82	82	82	1975400000	202740000	159600000	121440000	0	1	0	9
E9PK67;E9PNI7;Q53GL7;E9PPE7;F8W8G7;E9PJI2;E9PPV8;E9PM86;E9PSE7;E9PIA6;E9PIK9	E9PK67;E9PNI7;Q53GL7;E9PPE7	12;12;12;8;3;2;2;1;1;1;1	12;12;12;8;3;2;2;1;1;1;1	12;12;12;8;3;2;2;1;1;1;1	144460000	157060000	152860000	Poly [ADP-ribose] polymerase 10	PARP10	;;;	11	12	12	12	9	9	9	9	9	9	9	9	9	19.1	19.1	19.1	109.1	1016	1016;1037;1025;764;339;172;178;128;135;144;146	1	115	0	27.045	14.8	14.2	13.6	1926800000	183830000	193480000	149810000	4	1	4	32
E9PK91;Q9NYF8-3;Q9NYF8-2;Q9NYF8;E9PK09;E9PQN2;E9PKI6;Q9NYF8-4;E9PJA7;H0YF00;H0YF63;B0AZU3;H0YF14	E9PK91;Q9NYF8-3;Q9NYF8-2;Q9NYF8;E9PK09;E9PQN2;E9PKI6;Q9NYF8-4	13;13;13;13;12;12;12;8;6;2;1;1;1	13;13;13;13;12;12;12;8;6;2;1;1;1	13;13;13;13;12;12;12;8;6;2;1;1;1	378990000	464040000	429480000	Bcl-2-associated transcription factor 1	BCLAF1	;;;;;;;	13	13	13	13	8	10	10	8	10	10	8	10	10	17.7	17.7	17.7	100.4	871	871;869;918;920;725;750;752;747;467;118;126;138;187	1	149	0	23.339	11.4	14.1	14.5	4817900000	416160000	582380000	357450000	4	5	6	77
E9PK95;P28702;P28702-3	E9PK95;P28702;P28702-3	5;5;5	5;5;5	1;1;1	0	31330000	0	Retinoic acid receptor RXR-beta	RXRB	;;	3	5	5	1	4	5	1	4	5	1	0	1	0	18.2	18.2	4.9	38.516	347	347;533;537	1	41	0	9.2815	13.3	18.2	2.9	509370000	47331000	46701000	13389000	0	0	0	10
E9PKG1;H7C2I1;Q99873-3;Q99873-2;Q99873-4;Q99873;E9PIX6;E9PQ98;H0YDE4;E9PNR9;E9PMW9;E9PI83;Q9NR22-2;Q9NR22;E9PMZ2	E9PKG1;H7C2I1;Q99873-3;Q99873-2;Q99873-4;Q99873;E9PIX6;E9PQ98;H0YDE4;E9PNR9	20;20;20;20;20;20;14;13;11;10;5;5;3;3;2	20;20;20;20;20;20;14;13;11;10;5;5;3;3;2	20;20;20;20;20;20;14;13;11;10;5;5;3;3;2	1230300000	1182700000	1432600000	Protein arginine N-methyltransferase 1	PRMT1	;;;;;;;;;	15	20	20	20	17	17	17	17	17	17	17	17	17	68	68	68	37.709	325	325;371;343;347;353;361;209;205;238;160;110;113;385;394;63	1	314	0	97.697	59.4	60	57.2	16341000000	1310600000	1330200000	1173800000	17	18	16	220
E9PKH6;E9PPW7;O00217;E9PN51;F8W9K7;H0YDT4	E9PKH6;E9PPW7;O00217;E9PN51;F8W9K7	5;5;5;4;4;1	5;5;5;4;4;1	5;5;5;4;4;1	52496000	65907000	0	NADH dehydrogenase [ubiquinone] iron-sulfur protein 8, mitochondrial	NDUFS8	;;;;	6	5	5	5	3	2	2	3	2	2	3	2	2	41.3	41.3	41.3	15.892	138	138;184;210;110;124;93	1	39	0	13.213	25.4	12.3	19.6	658450000	60918000	59181000	29920000	1	1	2	20
E9PKP7;P17480-2;P17480;E9PMM2;H0YDH7	E9PKP7;P17480-2;P17480;E9PMM2	6;6;6;3;1	6;6;6;3;1	6;6;6;3;1	95330000	90875000	105420000	Nucleolar transcription factor 1	UBTF	;;;	5	6	6	6	4	5	5	4	5	5	4	5	5	8.6	8.6	8.6	87.435	745	745;727;764;149;36	1	67	0	14.176	5.9	7.7	7.7	1300300000	80086000	109240000	90200000	2	1	4	21
E9PKS9;E9PQE8;E9PN70;B4DME1;Q9Y296;G3V1A0;G5EA23;J3KP27	E9PKS9;E9PQE8;E9PN70;B4DME1;Q9Y296	3;3;3;3;3;1;1;1	3;3;3;3;3;1;1;1	3;3;3;3;3;1;1;1	25629000	45085000	30200000	Trafficking protein particle complex subunit 4	TRAPPC4	;;;;	8	3	3	3	2	2	3	2	2	3	2	2	3	28.6	28.6	28.6	14.15	126	126;176;257;165;219;117;126;181	1	29	0.00025927	3.145	17.5	17.5	28.6	369650000	23022000	50360000	27941000	1	2	1	4
E9PL10;Q96K17;Q96K17-2	E9PL10;Q96K17;Q96K17-2	6;6;4	6;6;4	6;6;4	276570000	348870000	335830000	Transcription factor BTF3;Transcription factor BTF3 homolog 4	BTF3L4	;;	3	6	6	6	2	5	2	2	5	2	2	5	2	37.9	37.9	37.9	15.779	145	145;158;100	1	81	0	41.646	32.4	37.9	24.8	3599800000	235000000	338970000	194270000	3	2	1	28
E9PL47;F8W860;Q9UBF8-3;Q9UBF8-2;Q9UBF8	E9PL47;F8W860;Q9UBF8-3;Q9UBF8-2;Q9UBF8	1;1;1;1;1	1;1;1;1;1	1;1;1;1;1	0	0	16075000	Phosphatidylinositol 4-kinase beta	PI4KB	;;;;	5	1	1	1	1	1	1	1	1	1	1	1	1	11.6	11.6	11.6	10.825	95	95;191;484;801;816	1	12	0.0093886	1.743	11.6	11.6	11.6	131950000	14709000	8217900	14297000	1	1	0	7
E9PLD3;E9PRG8	E9PLD3;E9PRG8	1;1	1;1	1;1	0	0	35024000	Uncharacterized protein C11orf98	C11orf98	;	2	1	1	1	1	1	1	1	1	1	1	1	1	13.1	13.1	13.1	11.6	99	99;122	1	12	0.00025853	3.1056	13.1	13.1	13.1	401690000	38691000	28026000	31150000	0	0	0	4
E9PLK3;P55786;B7Z463;E5RJ24;E7EWZ2;I3L083;A6NEC2;F5GZY4;H0YAQ6;H0YDG0;E9PP11;A6NEC2-2;E9PJ74;H0YCQ5;E9PJY4;E9PPD4;E9PRQ5;A6NEC2-3;E9PJF9;E9PPZ2;E9PI82	E9PLK3;P55786;B7Z463	45;45;41;15;15;15;15;12;11;8;8;8;5;4;4;4;4;3;2;2;1	45;45;41;15;15;15;15;12;11;8;8;8;5;4;4;4;4;3;2;2;1	45;45;41;15;15;15;15;12;11;8;8;8;5;4;4;4;4;3;2;2;1	3699500000	3404000000	3565700000	Puromycin-sensitive aminopeptidase	NPEPPS	;;	21	45	45	45	37	39	35	37	39	35	37	39	35	62.4	62.4	62.4	102.99	915	915;919;839;471;477;478;478;324;431;169;201;263;158;65;141;163;172;163;134;178;127	1	642	0	323.31	48	51.3	47.4	41151000000	3699800000	3878900000	3077500000	32	33	36	363
E9PLL0;E9PQA6;Q96EY5-2;Q96EY5-3;Q96EY5	E9PLL0;E9PQA6;Q96EY5-2;Q96EY5-3;Q96EY5	1;1;1;1;1	1;1;1;1;1	1;1;1;1;1	0	0	19219000	Multivesicular body subunit 12A	MVB12A	;;;;	5	1	1	1	1	1	1	1	1	1	1	1	1	12.4	12.4	12.4	12.987	121	121;273;233;257;273	1	11	0.004065	2.1889	12.4	12.4	12.4	198450000	23088000	19339000	17094000	0	1	0	1
E9PLL2;E9PMH7;Q9BQC3-2;Q9BQC3	E9PLL2;E9PMH7;Q9BQC3-2;Q9BQC3	1;1;1;1	1;1;1;1	1;1;1;1	0	12555000	0	Diphthamide biosynthesis protein 2	DPH2	;;;	4	1	1	1	0	1	0	0	1	0	0	1	0	19	19	19	10.705	100	100;147;261;489	1	6	0.00026695	3.5168	0	19	0	65168000	0	14106000	0	0	0	0	2
E9PLY5	E9PLY5	10	1	1	0	0	8138400		MACF1		1	10	1	1	7	6	5	1	0	1	1	0	1	8.6	0.9	0.9	159.92	1375	1375	1	6	0.0017579	2.6997	5.7	5.2	3.8	93006000	14313000	0	7238400	0	0	0	1
E9PM04;Q9BTE7;H0YCN4;H0Y9C5;E9PLH8;E9PM78;H0YD80;E9PLS2;E9PQV9;H0Y907;B4DH26;Q92564-2;Q92564;Q92564-3	E9PM04;Q9BTE7;H0YCN4	5;5;3;1;1;1;1;1;1;1;1;1;1;1	5;5;3;1;1;1;1;1;1;1;1;1;1;1	5;5;3;1;1;1;1;1;1;1;1;1;1;1	248630000	193520000	226740000	DCN1-like protein;DCN1-like protein 5	DCUN1D5	;;	14	5	5	5	4	4	4	4	4	4	4	4	4	34.2	34.2	34.2	17.855	152	152;237;195;21;30;67;68;71;84;116;232;257;292;336	1	42	0	9.3844	27.6	27.6	24.3	2131700000	305670000	439260000	61062000	3	2	1	17
E9PM46;Q96K76-2;Q96K76;Q96K76-3	E9PM46;Q96K76-2;Q96K76	20;19;19;1	20;19;19;1	20;19;19;1	222500000	229250000	263810000	Ubiquitin carboxyl-terminal hydrolase 47	USP47	;;	4	20	20	20	11	14	13	11	14	13	11	14	13	19.3	19.3	19.3	154.7	1355	1355;1287;1375;157	1	155	0	45.386	10.9	14.1	12.3	3026200000	169970000	195580000	228050000	2	3	5	49
E9PM92;O00193;E9PRZ9;E3W975;E9PQA1	E9PM92;O00193;E9PRZ9;E3W975	4;4;3;3;1	4;4;3;3;1	4;4;3;3;1	293080000	300670000	404590000	Small acidic protein	C11orf58;SMAP	;;;	5	4	4	4	4	4	3	4	4	3	4	4	3	30.1	30.1	30.1	17.506	156	156;183;90;139;86	1	73	0	12.819	30.1	30.1	29.5	3666600000	375330000	347250000	299450000	4	4	4	41
E9PMG4;Q9BUR4;E9PMR3	E9PMG4;Q9BUR4;E9PMR3	2;2;1	2;2;1	2;2;1	18037000	0	16245000	Telomerase Cajal body protein 1	WRAP53	;;	3	2	2	2	2	1	2	2	1	2	2	1	2	7.8	7.8	7.8	55.397	515	515;548;287	1	12	0.0026895	2.4267	7.8	4.9	7.8	94375000	19477000	14941000	13861000	1	0	1	4
E9PMM3;Q9Y5Y5;Q9Y5Y5-2;E9PMS3;E9PQW0;E9PLS4;E9PP98	E9PMM3;Q9Y5Y5;Q9Y5Y5-2;E9PMS3;E9PQW0;E9PLS4;E9PP98	2;2;2;1;1;1;1	2;2;2;1;1;1;1	2;2;2;1;1;1;1	31383000	0	33078000	Peroxisomal membrane protein PEX16	PEX16	;;;;;;	7	2	2	2	2	1	2	2	1	2	2	1	2	13.1	13.1	13.1	21.165	183	183;336;346;52;60;160;241	1	25	0.00025694	2.9914	13.1	6	13.1	352390000	40847000	13852000	19226000	1	1	0	10
E9PMQ6;Q00613-2;Q00613;E9PI02	E9PMQ6;Q00613-2;Q00613;E9PI02	2;2;2;1	2;2;2;1	2;2;2;1	0	0	41416000	Heat shock factor protein 1	HSF1	;;;	4	2	2	2	2	1	2	2	1	2	2	1	2	6.5	6.5	6.5	46.536	430	430;489;529;138	1	19	0	4.0819	6.5	3.7	6.5	273720000	8544000	33130000	40169000	1	1	1	8
E9PMR4;P48509;E9PRJ3	E9PMR4;P48509;E9PRJ3	4;4;3	4;4;3	4;4;3	394910000	410190000	447190000	Tetraspanin;CD151 antigen	CD151	;;	3	4	4	4	3	3	4	3	3	4	3	3	4	13.9	13.9	13.9	28.067	251	251;253;178	1	42	0	7.6754	10	10	13.9	5354400000	411200000	436610000	371050000	1	0	2	15
E9PMS6;Q8WWI1-3;F8WD26;J3KP06;Q8WWI1-4;Q8WWI1-2;Q8WWI1;E9PMT2;E9PLH4;E9PMP7;H0Y424;E9PLU6;E9PK58;E9PJ10;H0YDQ3;H0YDG6;H0YE95	E9PMS6;Q8WWI1-3;F8WD26;J3KP06;Q8WWI1-4;Q8WWI1-2;Q8WWI1;E9PMT2;E9PLH4;E9PMP7;H0Y424	15;15;14;14;14;14;14;13;13;10;8;2;2;2;2;2;1	15;15;14;14;14;14;14;13;13;10;8;2;2;2;2;2;1	15;15;14;14;14;14;14;13;13;10;8;2;2;2;2;2;1	202100000	199950000	186720000	LIM domain only protein 7	LMO7	;;;;;;;;;;	17	15	15	15	10	10	12	10	10	12	10	10	12	14	14	14	145.42	1275	1275;1349;1614;1670;1614;1670;1683;1398;1385;1045;1055;121;165;191;292;305;179	1	125	0	23.601	9.6	9.6	11.5	2625500000	186570000	171220000	284920000	5	3	4	52
E9PN41;A8MVV6;J3KQ42;O14817;E9PSH3;E9PPX8;J3KNL1	E9PN41;A8MVV6;J3KQ42;O14817;E9PSH3;E9PPX8	3;3;3;3;2;2;1	3;3;3;3;2;2;1	3;3;3;3;2;2;1	142760000	107340000	93909000	Tetraspanin;Tetraspanin-4	TSPAN4	;;;;;	7	3	3	3	2	2	2	2	2	2	2	2	2	30.3	30.3	30.3	15.195	132	132;174;257;238;100;159;204	1	32	0	33.086	25	25	25	1258600000	106790000	74407000	55521000	1	2	2	20
E9PNA6;Q13488;E9PM12;E9PMC5;H0YCE3;Q13488-2	E9PNA6;Q13488;E9PM12;E9PMC5;H0YCE3	4;4;3;2;2;1	4;4;3;2;2;1	4;4;3;2;2;1	0	0	29598000	V-type proton ATPase subunit a;V-type proton ATPase 116 kDa subunit a isoform 3	TCIRG1	;;;;	6	4	4	4	1	2	2	1	2	2	1	2	2	21.4	21.4	21.4	33.777	299	299;830;217;174;290;614	1	22	0	5.0009	5	8.7	11	256610000	20327000	12156000	28561000	0	0	1	7
E9PNK6;E9PPQ1;J3KNE7;Q16890-5;Q16890;Q16890-4;Q16890-3;Q16890-2;E9PNQ9	E9PNK6;E9PPQ1;J3KNE7;Q16890-5;Q16890;Q16890-4;Q16890-3;Q16890-2;E9PNQ9	7;7;7;7;7;6;6;6;5	7;7;7;7;7;6;6;6;5	7;7;7;7;7;6;6;6;5	564620000	543400000	438660000	Tumor protein D53	TPD52L1	;;;;;;;;	9	7	7	7	6	7	6	6	7	6	6	7	6	42.8	42.8	42.8	18.661	166	166;191;209;175;204;102;131;144;92	1	122	0	36.66	34.3	42.8	34.3	6139900000	659410000	676360000	425310000	6	6	5	69
E9PNP3;Q9H7C9;E9PJP1;E9PLK9;K4DI89;E9PR47;Q9H7C9-3;Q9H7C9-2	E9PNP3;Q9H7C9;E9PJP1;E9PLK9;K4DI89;E9PR47;Q9H7C9-3;Q9H7C9-2	2;2;1;1;1;1;1;1	2;2;1;1;1;1;1;1	2;2;1;1;1;1;1;1	45079000	42575000	0	Mth938 domain-containing protein	AAMDC	;;;;;;;	8	2	2	2	2	2	1	2	2	1	2	2	1	18.4	18.4	18.4	15.588	141	141;122;93;137;147;168;88;118	1	30	0	5.2495	18.4	18.4	11.3	543390000	55365000	53801000	8311600	1	1	0	15
E9PNW4;E9PR17;P13987;H0YET2	E9PNW4;E9PR17;P13987;H0YET2	4;4;4;2	4;4;4;2	4;4;4;2	1306000000	1136900000	1063100000	CD59 glycoprotein	CD59	;;;	4	4	4	4	4	4	4	4	4	4	4	4	4	29.6	29.6	29.6	11.985	108	108;130;128;52	1	71	0	14.317	29.6	29.6	29.6	14910000000	1379500000	1335000000	904590000	4	5	4	49
E9PP15;Q14114-2;Q14114-4;Q14114-3;Q14114;H0YCA4	E9PP15;Q14114-2;Q14114-4;Q14114-3;Q14114	3;3;3;3;3;1	2;2;2;2;2;1	2;2;2;2;2;1	0	20738000	0	Low-density lipoprotein receptor-related protein 8	LRP8	;;;;	6	3	2	2	3	3	1	2	2	1	2	2	1	7.2	5.7	5.7	50.913	457	457;700;793;904;963;121	1	10	0	8.6278	7.2	7.2	3.5	69196000	9482900	23301000	8571000	1	1	0	5
E9PPU0	E9PPU0	75	1	1	0	32277000	0				1	75	1	1	63	63	52	1	1	0	1	1	0	46.2	0.4	0.4	264.62	2420	2420	1	10	0.0040728	2.2049	39.9	39.4	34.2	330970000	34305000	36266000	0	1	0	0	2
E9PQ57;P78406;E9PPG9;B0QZ36;B0QZ37	E9PQ57;P78406;E9PPG9;B0QZ36	7;7;6;4;2	7;7;6;4;2	7;7;6;4;2	113390000	151430000	147220000	mRNA export factor	RAE1	;;;	5	7	7	7	6	5	4	6	5	4	6	5	4	27.9	27.9	27.9	47.831	437	437;368;217;137;87	1	65	0	30.523	24.9	22	13.7	1738000000	144630000	168350000	81229000	1	2	1	18
E9PQD0;E9PS30;E9PLI6;E9PS76;Q8N9N8	E9PQD0;E9PS30;E9PLI6;E9PS76;Q8N9N8	2;2;2;2;2	2;2;2;2;2	2;2;2;2;2	75590000	79071000	78634000	Probable RNA-binding protein EIF1AD	EIF1AD	;;;;	5	2	2	2	2	2	2	2	2	2	2	2	2	51.6	51.6	51.6	7.3314	64	64;78;113;114;165	1	29	0	22.149	51.6	51.6	51.6	826970000	78256000	96067000	63387000	2	1	2	14
E9PQM0;Q8WUK0-2;Q8WUK0-3;Q8WUK0	E9PQM0;Q8WUK0-2;Q8WUK0-3;Q8WUK0	2;2;2;2	2;2;2;2	2;2;2;2	17308000	14428000	16719000	Phosphatidylglycerophosphatase and protein-tyrosine phosphatase 1	PTPMT1	;;;	4	2	2	2	2	2	2	2	2	2	2	2	2	14.9	14.9	14.9	18.215	168	168;137;151;201	1	25	0	10.424	14.9	14.9	14.9	231590000	15630000	15957000	13611000	0	1	1	8
E9PQY2;Q9NQP4	E9PQY2;Q9NQP4	2;2	2;2	2;2	48169000	49524000	114120000	Prefoldin subunit 4	PFDN4	;	2	2	2	2	2	2	2	2	2	2	2	2	2	16.9	16.9	16.9	15.598	136	136;134	1	35	0	26.442	16.9	16.9	16.9	1070000000	37829000	29304000	105900000	0	0	2	12
E9PQY3;P11117;E9PHY0;B7Z7D2;F5GWV7;E9PP23;G5EA28;E9PKW9;E9PQW9;B7Z6U3;P11117-2	E9PQY3;P11117;E9PHY0;B7Z7D2;F5GWV7;E9PP23	11;11;10;8;7;6;3;3;3;3;3	11;11;10;8;7;6;3;3;3;3;3	11;11;10;8;7;6;3;3;3;3;3	650260000	606850000	561440000	Lysosomal acid phosphatase	ACP2	;;;;;	11	11	11	11	11	10	11	11	10	11	11	10	11	29.9	29.9	29.9	45.306	395	395;423;360;391;236;305;122;151;160;162;160	1	143	0	49.205	29.9	27.1	29.9	7343400000	703990000	613910000	529200000	9	7	9	85
E9PR38;H0YEH2;Q14671-4;Q14671	E9PR38;H0YEH2;Q14671-4;Q14671	7;7;7;7	1;1;1;1	1;1;1;1	0	0	9966700	Pumilio homolog 1	PUM1	;;;	4	7	1	1	6	4	4	1	1	1	1	1	1	10.5	1.6	1.6	100.5	944	944;1125;1127;1186	1	11	0.0099638	1.6441	8.4	5.9	4.9	142170000	16350000	17719000	8864500	0	1	0	3
E9PR71;Q9P2Y5	E9PR71;Q9P2Y5	1;1	1;1	1;1	0	0	8782500	UV radiation resistance-associated gene protein	UVRAG	;	2	1	1	1	1	1	1	1	1	1	1	1	1	1.7	1.7	1.7	66.997	598	598;699	1	12	0.0012601	2.7476	1.7	1.7	1.7	100670000	9428500	8623700	7811200	0	0	1	7
E9PRM7;Q96BI1	E9PRM7;Q96BI1	2;2	2;2	2;2	0	50269000	0	Solute carrier family 22 member 18	SLC22A18	;	2	2	2	2	2	2	2	2	2	2	2	2	2	7.4	7.4	7.4	34.952	326	326;424	1	24	0	5.6217	7.4	7.4	7.4	624550000	56904000	54849000	38810000	0	1	0	8
E9PS17;E9PK59;Q96KG9-5;Q96KG9-3;Q96KG9-4;Q96KG9-6;Q96KG9-2;Q96KG9;E9PPN3;H0YCI6	E9PS17;E9PK59;Q96KG9-5;Q96KG9-3;Q96KG9-4;Q96KG9-6;Q96KG9-2;Q96KG9;E9PPN3	10;10;10;10;10;10;10;10;7;3	10;10;10;10;10;10;10;10;7;3	10;10;10;10;10;10;10;10;7;3	348910000	299020000	381980000	N-terminal kinase-like protein	SCYL1	;;;;;;;;	10	10	10	10	7	8	4	7	8	4	7	8	4	16.1	16.1	16.1	85.718	775	775;780;626;707;781;787;791;808;665;175	1	96	0	26.464	11.4	12.1	6.5	4326800000	403060000	400650000	115740000	2	4	3	42
E9PS74;Q8NBI5;E7EQD2;H0YD64	E9PS74;Q8NBI5;E7EQD2;H0YD64	3;3;3;2	3;3;3;2	3;3;3;2	58261000	70841000	68960000	Solute carrier family 43 member 3	SLC43A3	;;;	4	3	3	3	3	3	3	3	3	3	3	3	3	8.2	8.2	8.2	36.797	331	331;491;504;137	1	34	0	3.8744	8.2	8.2	8.2	714750000	70730000	88033000	57857000	2	1	1	15
E9PSH2;B1AP13;P08174-4;P08174;P08174-3;P08174-5;P08174-2;P08174-6;P08174-7;H3BLV0;B1AP15;H7BY55	E9PSH2;B1AP13;P08174-4;P08174;P08174-3;P08174-5;P08174-2;P08174-6;P08174-7;H3BLV0;B1AP15	19;19;19;19;19;19;19;19;19;18;10;6	19;19;19;19;19;19;19;19;19;18;10;6	19;19;19;19;19;19;19;19;19;18;10;6	6429300000	6106900000	6100400000	Complement decay-accelerating factor	CD55	;;;;;;;;;;	12	19	19	19	17	18	18	17	18	18	17	18	18	55.4	55.4	55.4	41.227	377	377;444;364;381;384;439;440;525;551;326;317;129	1	326	0	323.31	52.5	53.1	48.5	70654000000	7883700000	8357900000	4229400000	33	27	28	341
E9PSI1;E9PL78;E9PJM1;E9PMQ9;O15321-2;O15321;E9PQY7;E9PS99;G3V1B9;E9PNW2;E9PQI5;E9PJC4;E9PQ80;H0YI89	E9PSI1;E9PL78;E9PJM1;E9PMQ9;O15321-2;O15321;E9PQY7;E9PS99;G3V1B9	14;9;9;9;9;9;8;8;7;6;5;5;5;2	14;9;9;9;9;9;8;8;7;6;5;5;5;2	9;9;9;9;9;9;8;8;7;6;0;5;0;0	350640000	340870000	380890000	Transmembrane 9 superfamily member 1	TM9SF1	;;;;;;;;	14	14	14	9	12	12	8	12	12	8	8	8	5	20.2	20.2	12.5	92.386	815	815;300;420;589;489;606;242;257;519;207;166;210;213;61	1	170	0	119.02	19.1	19.3	10.9	4523900000	416210000	457240000	235010000	10	8	6	94
F2Z2V0;B0QZ18;Q99829;E7ENH5;A6PVH9;Q5JX58;Q5JX59;Q5JX60;Q5JX44;Q5JX45;Q5JX56;Q5JX61;Q5JX52;Q5JX55;Q5JX54;Q5JX57;E7EV27;H0Y524	F2Z2V0;B0QZ18;Q99829;E7ENH5;A6PVH9;Q5JX58;Q5JX59;Q5JX60;Q5JX44;Q5JX45;Q5JX56;Q5JX61;Q5JX52	7;7;7;6;6;5;5;5;5;5;4;4;4;3;2;2;2;2	7;7;7;6;6;5;5;5;5;5;4;4;4;3;2;2;2;2	7;7;7;6;6;5;5;5;5;5;4;4;4;3;2;2;2;2	539860000	437350000	499530000	Copine-1	CPNE1	;;;;;;;;;;;;	18	7	7	7	7	7	6	7	7	6	7	7	6	12.6	12.6	12.6	58.634	533	533;542;537;427;481;201;209;231;304;386;174;213;305;152;136;137;138;208	1	104	0	15.368	12.6	12.6	11.3	5411100000	606230000	555470000	399320000	5	5	5	52
F2Z2X4;Q9C0E2	F2Z2X4;Q9C0E2	5;5	5;5	5;5	26241000	0	0	Exportin-4	XPO4	;	2	5	5	5	4	3	1	4	3	1	4	3	1	5.6	5.6	5.6	130.15	1151	1151;1151	1	27	0	9.0921	4.3	3.5	0.9	154890000	27336000	18174000	4503000	2	1	0	9
F2Z363;F8WFB7;G5E9R6;H3BUI7;F8WB39;F8WDQ9;F8WD80;H3BSR4;C9JF62;C9JFD2;C9JSK8;C9IZ93;C9J9P8;Q969M7-5;Q969M7-4;Q969M7-3;C9J212;Q969M7;Q969M7-2	F2Z363;F8WFB7;G5E9R6;H3BUI7;F8WB39;F8WDQ9;F8WD80;H3BSR4;C9JF62;C9JFD2;C9JSK8;C9IZ93;C9J9P8;Q969M7-5;Q969M7-4;Q969M7-3;C9J212;Q969M7;Q969M7-2	1;1;1;1;1;1;1;1;1;1;1;1;1;1;1;1;1;1;1	1;1;1;1;1;1;1;1;1;1;1;1;1;1;1;1;1;1;1	1;1;1;1;1;1;1;1;1;1;1;1;1;1;1;1;1;1;1	0	0	124650000	NEDD8-conjugating enzyme UBE2F	UBE2F;UBE2F-SCLY	;;;;;;;;;;;;;;;;;;	19	1	1	1	1	1	1	1	1	1	1	1	1	21.3	21.3	21.3	5.17	47	47;48;63;73;86;101;123;131;139;142;153;163;171;102;120;153;164;185;211	1	15	0.002919	2.3638	21.3	21.3	21.3	541220000	5785200	22158000	110870000	0	0	0	8
F5GWH5;P61165	F5GWH5;P61165	1;1	1;1	1;1	115250000	0	103060000	Transmembrane protein 258	TMEM258	;	2	1	1	1	1	1	1	1	1	1	1	1	1	16.3	16.3	16.3	5.7065	49	49;79	1	30	0.00938	1.7356	16.3	16.3	16.3	1202600000	115540000	94096000	95843000	2	1	2	17
F5GWJ1;O60245;O60245-2;H0YAH0	F5GWJ1;O60245;O60245-2;H0YAH0	13;13;13;7	13;13;13;7	13;13;13;7	332200000	340270000	287470000	Protocadherin-7	PCDH7	;;;	4	13	13	13	8	8	11	8	8	11	8	8	11	15	15	15	136.57	1255	1255;1069;1072;937	1	111	0	62.052	8.5	8.2	12.1	3734800000	333520000	346960000	322560000	2	3	8	55
F5GWP8;C9JK18;C9JKY1;C9JTX4;C9J826;C9JPI2;K7ERP3	F5GWP8	40;13;13;12;12;3;3	40;13;13;12;12;3;3	0;0;0;0;0;0;0	8144200000	8348800000	8961300000		KRT17		7	40	40	0	39	39	38	39	39	38	0	0	0	73.3	73.3	0	66.35	591	591;295;297;235;276;86;104	1	813	0	323.31	73.1	73.3	69.9	105410000000	9631400000	9311300000	10734000000	45	38	42	511
F5GWS3;Q6P9B6;H3BM75;H3BUB0	F5GWS3;Q6P9B6	5;5;2;1	5;5;2;1	5;5;2;1	67798000	57290000	68114000	TLD domain-containing protein 1	TLDC1	;	4	5	5	5	2	4	3	2	4	3	2	4	3	18.2	18.2	18.2	48.035	429	429;456;193;148	1	44	0	10.515	6.8	13.5	10.5	705440000	64243000	72763000	74876000	0	1	1	10
F5GWT4;F5H2M7;Q9H4A3-2;Q9H4A3;Q9H4A3-5;Q9H4A3-6;Q9H4A3-7;Q9H4A3-4;F6UYG0;K7ENT7;Q96J92-2;Q96J92-3;Q96J92	F5GWT4;F5H2M7;Q9H4A3-2;Q9H4A3;Q9H4A3-5;Q9H4A3-6;Q9H4A3-7	17;17;17;17;17;17;17;8;7;1;1;1;1	17;17;17;17;17;17;17;8;7;1;1;1;1	15;15;15;15;15;15;15;8;5;1;1;1;1	221230000	266760000	249130000	Serine/threonine-protein kinase WNK1	WNK1	;;;;;;	13	17	17	15	11	13	12	11	13	12	10	12	12	9.7	9.7	8.7	225.5	2134	2134;2880;2135;2382;2634;2642;2833;1975;393;469;663;1165;1243	1	147	0	39.496	6.2	7.4	6.9	3180900000	196370000	295220000	251390000	7	7	4	69
F5GWX5;Q14839;Q14839-2;Q8TDI0;Q12873-2;Q12873;Q12873-3;K7EMY3;Q5TG85;F5H6N4;F2Z2R5;K7EPV1;K7ESA5;I3L229;H7C3H7;H7C0J3	F5GWX5;Q14839;Q14839-2	44;44;44;9;9;9;9;7;6;3;3;1;1;1;1;1	44;44;44;9;9;9;9;7;6;3;3;1;1;1;1;1	44;44;44;9;9;9;9;7;6;3;3;1;1;1;1;1	729210000	852200000	817480000	Chromodomain-helicase-DNA-binding protein 4	CHD4	;;	16	44	44	44	29	35	32	29	35	32	29	35	32	32.4	32.4	32.4	217.1	1905	1905;1912;1940;1954;1966;2000;2059;1060;808;354;1225;63;127;249;277;383	1	392	0	173.05	19.6	25.2	22.6	8878200000	874240000	1218200000	789830000	11	21	20	151
F5GWY5;O00592-2;O00592;F5H7A2	F5GWY5;O00592-2;O00592;F5H7A2	8;8;8;7	8;8;8;7	8;8;8;7	1267400000	1097100000	1159300000	Podocalyxin	PODXL	;;;	4	8	8	8	8	8	6	8	8	6	8	8	6	18.4	18.4	18.4	58.865	560	560;526;558;526	1	94	0	82.627	18.4	18.4	13	14495000000	1371500000	1310500000	1021800000	4	4	6	60
F5GXF0;P22736;P22736-2	F5GXF0;P22736;P22736-2	3;3;3	3;3;3	3;3;3	20216000	22334000	25832000	Nuclear receptor subfamily 4 group A member 1	NR4A1	;;	3	3	3	3	3	3	2	3	3	2	3	3	2	5.4	5.4	5.4	70.451	652	652;598;611	1	26	0	4.9455	5.4	5.4	3.4	234170000	25706000	27829000	18590000	1	2	1	11
F5GXI4;Q5TG12;E9PGC5;Q15262;Q15262-2;Q15262-3;Q15262-4;H0Y6V4;H0Y6P5	F5GXI4;Q5TG12;E9PGC5;Q15262;Q15262-2;Q15262-3;Q15262-4;H0Y6V4;H0Y6P5	2;2;2;2;2;2;2;1;1	2;2;2;2;2;2;2;1;1	2;2;2;2;2;2;2;1;1	0	0	20017000	Protein-tyrosine-phosphatase;Receptor-type tyrosine-protein phosphatase kappa	PTPRK	;;;;;;;;	9	2	2	2	1	1	2	1	1	2	1	1	2	2.1	2.1	2.1	163.91	1457	1457;1458;1472;1439;1440;1446;1462;260;343	1	10	0.0002633	3.3481	0.8	1.2	2.1	78539000	7798600	7433500	17804000	1	1	1	3
F5GXX5;P61803;F5H895	F5GXX5;P61803;F5H895	4;4;2	4;4;2	4;4;2	759470000	742490000	646070000	Dolichyl-diphosphooligosaccharide--protein glycosyltransferase subunit DAD1	DAD1	;;	3	4	4	4	4	4	3	4	4	3	4	4	3	47.1	47.1	47.1	9.5541	85	85;113;65	1	62	0	20.115	47.1	47.1	37.6	9037200000	794240000	823020000	545350000	5	4	3	33
F5GYC1;E7EUE1;P28288;P28288-2;P28288-3	F5GYC1;E7EUE1;P28288;P28288-2	13;13;13;8;2	13;13;13;8;2	13;13;13;8;2	200450000	216830000	237420000	ATP-binding cassette sub-family D member 3	ABCD3	;;;	5	13	13	13	8	7	10	8	7	10	8	7	10	24.2	24.2	24.2	67.315	586	586;683;659;549;236	1	130	0	55.948	15.4	13.8	18.3	2507000000	209940000	172480000	238540000	5	6	6	68
F5GYC4;B4DG22;B7ZB17;P51812;B1AXG1;B1AXG2;Q9UK32;B7ZL90;D6R910;D6RHW7;D6RA62;Q5TI62;D6RE03	F5GYC4;B4DG22;B7ZB17;P51812	16;16;16;16;5;3;3;3;2;1;1;1;1	16;16;16;16;5;3;3;3;2;1;1;1;1	12;12;12;12;2;2;1;1;0;0;0;0;0	345840000	298540000	288650000	Ribosomal protein S6 kinase alpha-3	RPS6KA3	;;;	13	16	16	12	12	14	12	12	14	12	10	10	8	27.9	27.9	21.8	80.622	710	710;711;712;740;227;133;745;745;125;96;141;166;171	1	171	0	22.048	19.7	22.7	19.2	3875000000	445750000	408180000	228040000	5	6	3	62
F5GYJ5;Q9NX18;F8W679;M0QYN2;F5GXW4;M0R060;F5H5T6;F5H8E2	F5GYJ5;Q9NX18;F8W679;M0QYN2;F5GXW4;M0R060;F5H5T6	4;4;2;2;2;2;2;1	4;4;2;2;2;2;2;1	4;4;2;2;2;2;2;1	0	0	88064000	Succinate dehydrogenase assembly factor 2, mitochondrial	SDHAF2	;;;;;;	8	4	4	4	3	2	4	3	2	4	3	2	4	31.2	31.2	31.2	18.388	154	154;166;129;133;133;141;163;88	1	32	0	11.333	23.4	17.5	31.2	885010000	89429000	58549000	92894000	0	1	2	12
F5GYK2;Q9NRL3;F8VYA6;M0R317;M0QZM0	F5GYK2;Q9NRL3;F8VYA6;M0R317	6;6;6;5;2	6;6;6;5;2	5;5;5;4;2	90309000	93192000	93394000	Striatin-4	STRN4	;;;	5	6	6	5	3	2	4	3	2	4	2	1	3	18.8	18.8	17.2	68.584	634	634;753;760;198;317	1	57	0	8.8047	10.3	8.2	9.9	1124800000	60994000	44889000	109590000	3	1	3	29
F5GYQ1;P61421;J3QL14;R4GN72;H3BQB4;H3BSG7;H3BQJ1	F5GYQ1;P61421;J3QL14;R4GN72	7;7;5;5;2;2;1	7;7;5;5;2;2;1	7;7;5;5;2;2;1	174680000	183000000	178890000	V-type proton ATPase subunit d 1	ATP6V0D1	;;;	7	7	7	7	6	6	7	6	6	7	6	6	7	29.6	29.6	29.6	44.659	392	392;351;232;274;113;115;227	1	79	0	48.276	27.8	27.8	29.6	2208100000	233590000	261320000	196820000	4	4	4	43
F5GYV5;H7BZV4;F8WCT1;Q66PJ3-7;Q66PJ3-4;Q66PJ3-3;Q66PJ3-2;Q66PJ3;F8WEP2;F5H7X4;Q66PJ3-5	F5GYV5;H7BZV4;F8WCT1;Q66PJ3-7;Q66PJ3-4;Q66PJ3-3;Q66PJ3-2;Q66PJ3;F8WEP2;F5H7X4;Q66PJ3-5	2;2;2;2;2;2;2;2;1;1;1	2;2;2;2;2;2;2;2;1;1;1	2;2;2;2;2;2;2;2;1;1;1	11959000	0	0	ADP-ribosylation factor-like protein 6-interacting protein 4	ARL6IP4	;;;;;;;;;;	11	2	2	2	2	1	1	2	1	1	2	1	1	13.3	13.3	13.3	23.687	211	211;216;229;226;399;402;413;421;170;307;365	1	15	0	4.5741	13.3	7.6	7.6	190580000	12962000	17698000	9430000	2	0	0	7
F5GZP8;Q5JVZ5;B4DRL5;Q7Z5G9;Q96JJ3;B4DZ20;Q5JW01;H0YCM7;Q5JVZ8;Q5JVZ4	F5GZP8;Q5JVZ5;B4DRL5;Q7Z5G9;Q96JJ3;B4DZ20;Q5JW01;H0YCM7	5;5;5;5;5;4;3;3;2;1	5;5;5;5;5;4;3;3;2;1	5;5;5;5;5;4;3;3;2;1	34548000	39113000	0	Engulfment and cell motility protein 2	ELMO2	;;;;;;;	10	5	5	5	3	2	2	3	2	2	3	2	2	14.5	14.5	14.5	62.135	537	537;718;732;632;720;452;283;441;267;338	1	33	0	20.23	9.3	6	7.8	455850000	32027000	38142000	42354000	2	2	0	13
F5GZS6;P08195;J3KPF3;P08195-3;P08195-4;H0YFS2;F5GZI0;H0YFX4	F5GZS6;P08195;J3KPF3;P08195-3;P08195-4	33;33;32;32;32;11;8;4	33;33;32;32;32;11;8;4	2;2;1;1;1;0;0;0	11980000000	12843000000	14968000000	4F2 cell-surface antigen heavy chain	SLC3A2	;;;;	8	33	33	2	31	32	27	31	32	27	1	1	1	56.9	56.9	5.7	64.872	599	599;630;631;568;661;247;175;122	1	717	0	323.31	54.1	54.1	50.4	162720000000	13395000000	15353000000	12957000000	47	51	49	545
F5GZU5;G3V1P5;Q96RN5-3;Q96RN5-2;Q96RN5;B4DM43;H7C308	F5GZU5;G3V1P5;Q96RN5-3;Q96RN5-2;Q96RN5;B4DM43;H7C308	2;2;2;2;2;1;1	2;2;2;2;2;1;1	2;2;2;2;2;1;1	18871000	20719000	0	Mediator of RNA polymerase II transcription subunit 15	MED15	;;;;;;	7	2	2	2	2	2	1	2	2	1	2	2	1	4.4	4.4	4.4	71.462	637	637;722;677;748;788;189;194	1	15	0.0044939	2.0489	4.4	4.4	1.6	141520000	17997000	22960000	8097500	0	1	0	5
F5H012;P19474;P19474-2;H0YDP8	F5H012;P19474;P19474-2	13;13;11;3	13;13;11;3	13;13;11;3	320060000	332250000	292390000	E3 ubiquitin-protein ligase TRIM21	TRIM21	;;	4	13	13	13	11	9	7	11	9	7	11	9	7	34.5	34.5	34.5	54.081	475	475;475;398;90	1	116	0	97.346	31.2	26.9	18.5	3660100000	404270000	373350000	199560000	5	3	4	46
F5H0B0;H0YC44;P55327-8;H0YC42;U3KQQ8	F5H0B0;H0YC44;P55327-8	10;5;5;2;1	2;0;0;2;1	0;0;0;0;0	40253000	45258000	33877000	Tumor protein D52	TPD52	;;	5	10	2	0	8	9	8	2	2	2	0	0	0	42.8	7.6	0	31.17	278	278;148;151;94;83	1	25	0	4.9827	30.2	41.4	31.3	505990000	41891000	52737000	24798000	1	1	1	7
F5H0L8;Q9Y6Y8;Q9Y6Y8-2;H7C0V8;H7C4C4	F5H0L8;Q9Y6Y8;Q9Y6Y8-2	10;10;9;3;2	10;10;9;3;2	10;10;9;3;2	119340000	115780000	79197000	SEC23-interacting protein	SEC23IP	;;	5	10	10	10	7	5	3	7	5	3	7	5	3	16.7	16.7	16.7	89.666	789	789;1000;924;194;153	1	71	0	17.608	12.5	7.6	4.6	1118800000	152980000	106140000	31698000	6	2	2	32
F5H0U5;Q9NZD2;H0YFS9;F5GZ49	F5H0U5;Q9NZD2;H0YFS9	3;3;2;1	3;3;2;1	3;3;2;1	36560000	0	0	Glycolipid transfer protein	GLTP	;;	4	3	3	3	3	1	1	3	1	1	3	1	1	20.5	20.5	20.5	21.659	190	190;209;183;67	1	24	0	5.3374	20.5	6.3	6.3	304160000	47334000	11100000	11708000	2	0	0	3
F5H144;Q9Y653-5;Q9Y653-2;Q9Y653-3;Q9Y653;H3BSJ6;H3BRH0;Q9Y653-4;H3BNH4;H3BV52	F5H144;Q9Y653-5;Q9Y653-2;Q9Y653-3;Q9Y653;H3BSJ6;H3BRH0;Q9Y653-4	5;5;5;5;5;3;3;3;1;1	5;5;5;5;5;3;3;3;1;1	5;5;5;5;5;3;3;3;1;1	116790000	127980000	126480000	G-protein coupled receptor 56;GPR56 N-terminal fragment;GPR56 C-terminal fragment	GPR56;ADGRG1	;;;;;;;	10	5	5	5	4	4	5	4	4	5	4	4	5	12.5	12.5	12.5	57.375	512	512;518;687;692;693;187;256;523;198;199	1	69	0	16.514	10.2	10.2	12.5	1486500000	99075000	138850000	142320000	1	2	0	20
F5H170;Q8WW22-3;Q8WW22;Q8WW22-2	F5H170;Q8WW22-3;Q8WW22;Q8WW22-2	2;2;2;2	2;2;2;2	2;2;2;2	0	158100000	0	DnaJ homolog subfamily A member 4	DNAJA4	;;;	4	2	2	2	1	2	1	1	2	1	1	2	1	4.1	4.1	4.1	24.377	219	219;370;397;426	1	22	0.0093586	1.7043	4.1	4.1	3.7	1557500000	84978000	187940000	133410000	0	1	0	11
F5H1F6;F5H4M0;Q9H9H4	F5H1F6;F5H4M0;Q9H9H4	5;5;5	5;5;5	5;5;5	23521000	0	34478000	Vacuolar protein sorting-associated protein 37B	VPS37B	;;	3	5	5	5	3	3	3	3	3	3	3	3	3	40.2	40.2	40.2	20.654	184	184;271;285	1	27	0	3.8773	25	21.2	26.6	247470000	30053000	31266000	27594000	2	1	0	8
F5H1G9;F8WA55;F8WA56;A6NFN2;Q8IZP0-10;Q8IZP0-8;Q8IZP0-7;Q8IZP0-2;Q8IZP0-4;Q8IZP0-3;Q8IZP0-5;Q8IZP0-6;Q8IZP0-9;Q8IZP0;Q8IZP0-12;Q8IZP0-11;E9PEZ7;E7EW77;E7EP65;J3KNB2;Q9NYB9-3;Q9NYB9-2;Q9NYB9-4;Q9NYB9;H0Y6B5;F8WAL6	F5H1G9;F8WA55;F8WA56;A6NFN2;Q8IZP0-10;Q8IZP0-8;Q8IZP0-7;Q8IZP0-2;Q8IZP0-4;Q8IZP0-3;Q8IZP0-5;Q8IZP0-6;Q8IZP0-9;Q8IZP0;Q8IZP0-12;Q8IZP0-11	8;8;8;8;8;8;8;8;8;8;8;8;8;8;7;6;2;2;2;2;2;2;2;2;1;1	8;8;8;8;8;8;8;8;8;8;8;8;8;8;7;6;2;2;2;2;2;2;2;2;1;1	8;8;8;8;8;8;8;8;8;8;8;8;8;8;7;6;2;2;2;2;2;2;2;2;1;1	112390000	112480000	126030000	Abl interactor 1	ABI1	;;;;;;;;;;;;;;;	26	8	8	8	6	6	2	6	6	2	6	6	2	26.9	26.9	26.9	43.473	394	394;423;482;509;388;393;422;446;451;452;476;480;481;508;496;329;458;480;486;513;401;475;507;513;293;299	1	52	0	19.025	20.8	22.3	6.9	1438000000	134380000	155480000	56007000	4	4	2	28
F5H1H0;F5H025;P32004-3;P32004-2;P32004;H0Y5C3;E7EVM4;E7EPI4;E9PHJ4;H3BLW5	F5H1H0;F5H025;P32004-3;P32004-2;P32004	35;35;35;35;35;6;4;4;3;1	35;35;35;35;35;6;4;4;3;1	32;32;32;32;32;6;1;1;0;1	2620200000	2835800000	3115100000	Neural cell adhesion molecule L1	L1CAM	;;;;	10	35	35	32	33	33	30	33	33	30	30	30	27	37.4	37.4	35.4	139.67	1255	1255;1259;1248;1253;1257;190;128;150;83;153	1	531	0	323.31	35.2	35.3	33.1	34856000000	2934000000	3290800000	2790300000	32	27	26	318
F5H1S8;Q14165;H0YG07;F5GX14	F5H1S8;Q14165;H0YG07	6;6;3;2	6;6;3;2	6;6;3;2	177950000	193370000	209490000	Malectin	MLEC	;;	4	6	6	6	4	6	5	4	6	5	4	6	5	54.1	54.1	54.1	16.729	146	146;292;173;217	1	78	0	11.132	27.4	54.1	49.3	2431800000	125790000	221180000	137780000	2	2	2	33
F5H1S9;G8JLB3;Q9Y606-2;Q9Y606;F5GY32	F5H1S9;G8JLB3;Q9Y606-2;Q9Y606	4;4;4;4;1	4;4;4;4;1	4;4;4;4;1	44124000	47199000	42481000	tRNA pseudouridine synthase;tRNA pseudouridine synthase A, mitochondrial	PUS1	;;;	5	4	4	4	3	3	3	3	3	3	3	3	3	11.8	11.8	11.8	41.729	374	374;384;399;427;153	1	38	0	5.032	8.3	8.3	8.3	507590000	43069000	51354000	29657000	0	0	0	7
F5H1Y4;Q9HD26-2;Q9HD26;Q9HD26-3	F5H1Y4;Q9HD26-2;Q9HD26;Q9HD26-3	12;12;12;7	12;12;12;7	12;12;12;7	216280000	210480000	212770000	Golgi-associated PDZ and coiled-coil motif-containing protein	GOPC	;;;	4	12	12	12	8	9	8	8	9	8	8	9	8	36.4	36.4	36.4	50.584	462	462;454;462;319	1	98	0	55.786	21.6	25.8	23.2	2486300000	254980000	234430000	230320000	5	4	4	53
F5H1Z7;Q99985;B4DRL8	F5H1Z7;Q99985	8;8;2	8;8;2	8;8;2	105260000	118130000	102150000	Semaphorin-3C	SEMA3C	;	3	8	8	8	4	4	4	4	4	4	4	4	4	15.2	15.2	15.2	87.284	769	769;751;233	1	57	0	21.125	8.5	7.2	8.5	1290600000	110770000	117660000	81380000	2	3	2	26
F5H2A7;P61758	F5H2A7;P61758	9;9	9;9	9;9	535370000	512230000	588750000	Prefoldin subunit 3	VBP1	;	2	9	9	9	8	8	7	8	8	7	8	8	7	45.3	45.3	45.3	22.286	192	192;197	1	114	0	55.995	40.6	40.6	35.4	6489100000	578390000	568970000	551370000	5	5	2	44
F5H2D5;Q9UHV5-2;Q9UHV5-3;Q9UHV5	F5H2D5;Q9UHV5-2;Q9UHV5-3;Q9UHV5	1;1;1;1	1;1;1;1	1;1;1;1	0	7110800	0	Rap guanine nucleotide exchange factor-like 1	RAPGEFL1	;;;	4	1	1	1	1	1	0	1	1	0	1	1	0	1.4	1.4	1.4	58.002	505	505;456;511;662	1	11	1	-2	1.4	1.4	0	188790000	11569000	7989500	0	0	0	0	0
F5H2H5;Q86XL3;Q86XL3-2;F5H6J0;F5H417;F5H1D4;Q86XL3-3	F5H2H5;Q86XL3;Q86XL3-2	9;9;7;2;2;1;1	9;9;7;2;2;1;1	9;9;7;2;2;1;1	92108000	81241000	97329000	Ankyrin repeat and LEM domain-containing protein 2	ANKLE2	;;	7	9	9	9	7	5	3	7	5	3	7	5	3	16	16	16	97.722	876	876;938;648;129;251;258;293	1	65	0	21.491	12	10.6	5.4	1058400000	140400000	101180000	37919000	4	3	1	31
F5H2J3;Q96GC9;K7EL93;K7EL74;K7ENU2;K7EK01;K7EMI0;K7ELS2;K7EL46;K7EPE7;B4DED7;B4DGZ7;B4DVV9	F5H2J3;Q96GC9;K7EL93;K7EL74;K7ENU2;K7EK01;K7EMI0;K7ELS2	3;3;2;2;2;2;2;2;1;1;1;1;1	3;3;2;2;2;2;2;2;1;1;1;1;1	3;3;2;2;2;2;2;2;1;1;1;1;1	54743000	73862000	75502000	Vacuole membrane protein 1	VMP1	;;;;;;;	13	3	3	3	2	3	3	2	3	3	2	3	3	15.1	15.1	15.1	40.075	350	350;406;74;75;78;92;138;167;58;225;272;309;214	1	32	0	5.2626	10.6	15.1	15.1	751490000	61074000	82876000	62387000	1	2	2	14
F5H2S7;Q13561;Q13561-3;Q13561-2;F5H223;H0YI98;F8W1I6;F8VW18;F8VX93;F8VRV7;H0YHL1;F8W0U6	F5H2S7;Q13561;Q13561-3;Q13561-2;F5H223;H0YI98;F8W1I6	17;17;17;17;16;12;12;8;4;4;3;1	17;17;17;17;16;12;12;8;4;4;3;1	17;17;17;17;16;12;12;8;4;4;3;1	819380000	906880000	936200000	Dynactin subunit 2	DCTN2	;;;;;;	12	17	17	17	15	13	14	15	13	14	15	13	14	62.3	62.3	62.3	44.809	406	406;401;403;406;378;268;315;278;135;152;128;45	1	218	0	134.88	53.2	48.5	49.3	10788000000	877500000	1092100000	848470000	10	6	10	88
F5H2V0;D3YTF9;Q9NNW7;F5H1L4;E7ENA2;D3YTF8;Q9NNW7-2;E7EWK1;Q9NNW7-3;Q9NNW7-4	F5H2V0;D3YTF9;Q9NNW7;F5H1L4;E7ENA2;D3YTF8;Q9NNW7-2;E7EWK1;Q9NNW7-3	13;13;13;12;12;12;12;10;8;4	12;12;12;11;11;11;11;9;8;4	12;12;12;11;11;11;11;9;8;4	118240000	122420000	0	Thioredoxin reductase 2, mitochondrial	TXNRD2	;;;;;;;;	10	13	12	12	9	9	3	8	8	2	8	8	2	42.6	39.7	39.7	56.228	521	521;523;524;492;494;499;498;338;428;277	1	79	0	20.128	25.9	27.4	8.6	1198500000	145300000	146660000	28713000	4	3	0	28
F5H315;Q9HCS7	F5H315;Q9HCS7	3;3	3;3	3;3	0	27260000	27705000	Pre-mRNA-splicing factor SYF1	XAB2	;	2	3	3	3	2	2	2	2	2	2	2	2	2	4.5	4.5	4.5	99.679	852	852;855	1	25	0	10.547	3.3	3.3	2.5	328480000	30861000	30955000	20524000	0	1	0	7
F5H325;P34059	F5H325;P34059	2;2	2;2	2;2	15797000	14987000	15022000	N-acetylgalactosamine-6-sulfatase	GALNS	;	2	2	2	2	2	2	2	2	2	2	2	2	2	5.4	5.4	5.4	49.794	447	447;522	1	19	0.00026582	3.457	5.4	5.4	5.4	126940000	16817000	16491000	13310000	1	2	1	11
F5H357;B4E3T4;Q93062-4;Q93062-5;Q93062;Q93062-2;Q93062-3;H0YBU9;Q6ZRY4	F5H357;B4E3T4;Q93062-4;Q93062-5;Q93062;Q93062-2;Q93062-3	3;3;3;3;3;3;3;1;1	3;3;3;3;3;3;3;1;1	3;3;3;3;3;3;3;1;1	21367000	21297000	0	RNA-binding protein with multiple splicing	RBPMS	;;;;;;	9	3	3	3	2	2	1	2	2	1	2	2	1	23.5	23.5	23.5	17.135	153	153;224;143;152;196;204;219;119;209	1	27	0	6.9173	13.7	14.4	9.2	202410000	19950000	16202000	7946000	0	2	0	10
F5H365;Q15436;F5H6C4;B3KXI2;G3V5X8;G3V4Q2;G3V4V1;G3V1W4;G3V3G5;G3V2R6;G3V5K1	F5H365;Q15436;F5H6C4;B3KXI2	26;26;21;20;4;4;4;4;4;4;2	26;26;21;20;4;4;4;4;4;4;2	24;24;20;19;3;3;3;3;3;3;1	1336100000	1279000000	1234600000	Protein transport protein Sec23A	SEC23A	;;;	11	26	26	24	24	22	22	24	22	22	22	20	20	50.5	50.5	47.3	82.968	736	736;765;663;563;85;86;93;108;140;169;40	1	336	0	323.01	43.3	39.8	41.6	14313000000	1428500000	1434000000	1197300000	20	20	18	182
F5H442;Q99816;Q99816-2;J3QRU6;J3QKS4	F5H442;Q99816	7;7;3;1;1	7;7;3;1;1	7;7;3;1;1	123760000	112670000	114710000	Tumor susceptibility gene 101 protein	TSG101	;	5	7	7	7	3	5	5	3	5	5	3	5	5	27.4	27.4	27.4	40.917	365	365;390;285;63;77	1	45	0	35.471	9.6	19.7	18.6	1152900000	95010000	156040000	105570000	2	2	3	16
F5H4G7;F5GYL8;O60684;Q5TFJ7;O15131;S4R3E5	F5H4G7;F5GYL8;O60684	15;15;15;7;7;4	15;15;15;7;7;4	9;9;9;3;2;4	534890000	421350000	435840000	Importin subunit alpha-7	KPNA6	;;	6	15	15	9	13	10	10	13	10	10	8	5	6	34.9	34.9	25.3	59.667	533	533;541;536;321;536;186	1	162	0	104.97	31	24.2	31	5106800000	571940000	476520000	344430000	10	8	7	94
F5H4J2;O75381-2;O75381	F5H4J2;O75381-2;O75381	5;5;5	5;5;5	5;5;5	67343000	93375000	88471000	Peroxisomal membrane protein PEX14	PEX14	;;	3	5	5	5	5	5	5	5	5	5	5	5	5	22	22	22	34.216	313	313;334;377	1	64	0	11.438	22	22	22	1230300000	51870000	160370000	132050000	2	3	1	28
F5H4K0;Q5T9L3;Q5T9L3-2;Q5T9L3-3;E9PM62;E9PKJ0;E9PJW4;H0YCG9;E9PQK1;Q7Z430;E9PM23;H0YDL2	F5H4K0;Q5T9L3;Q5T9L3-2;Q5T9L3-3;E9PM62;E9PKJ0;E9PJW4;H0YCG9	7;7;7;6;5;4;4;4;3;2;1;1	7;7;7;6;5;4;4;4;3;2;1;1	7;7;7;6;5;4;4;4;3;2;1;1	234900000	221630000	267290000	Protein wntless homolog	WLS	;;;;;;;	12	7	7	7	6	7	5	6	7	5	6	7	5	14.7	14.7	14.7	62.719	545	545;541;543;450;222;122;134;200;152;127;38;152	1	89	0	13.556	13	14.7	9.7	2565200000	249870000	269010000	169080000	4	6	3	41
F5H4R4;Q8IZD4	F5H4R4;Q8IZD4	1;1	1;1	1;1	0	0	10176000	mRNA-decapping enzyme 1B	DCP1B	;	2	1	1	1	1	1	1	1	1	1	1	1	1	13.4	13.4	13.4	13.544	119	119;617	1	11	0.0049563	2.024	13.4	13.4	13.4	115440000	10157000	8786800	9050800	0	0	0	1
F5H4Z3;Q5QPM7;Q92530;H0Y555;Q5QPM9;E7ER20	F5H4Z3;Q5QPM7;Q92530;H0Y555;Q5QPM9;E7ER20	2;2;2;1;1;1	2;2;2;1;1;1	2;2;2;1;1;1	98795000	84333000	95049000	Proteasome inhibitor PI31 subunit	PSMF1	;;;;;	6	2	2	2	2	2	2	2	2	2	2	2	2	15.4	15.4	15.4	19.29	175	175;263;271;107;183;201	1	36	0	5.6877	15.4	15.4	15.4	802520000	102230000	88564000	83773000	0	1	0	14
F5H569;Q93050-1;Q93050;Q93050-3;B7Z641;B7Z2A9;K7EM24;K7EN36;K7EPG4;F5H1T6	F5H569;Q93050-1;Q93050;Q93050-3;B7Z641;B7Z2A9	4;4;4;4;3;3;1;1;1;1	4;4;4;4;3;3;1;1;1;1	3;3;3;3;2;2;1;1;1;0	46978000	36042000	52812000	V-type proton ATPase 116 kDa subunit a isoform 1;V-type proton ATPase subunit a	ATP6V0A1	;;;;;	10	4	4	3	4	4	4	4	4	4	3	3	3	5.7	5.7	4.8	96.313	837	837;831;837;838;788;794;130;195;198;483	1	42	0	7.1765	5.7	5.7	5.7	523090000	54303000	50127000	57083000	2	1	1	15
F5H577;Q8WUW1;Q8WUW1-2	F5H577;Q8WUW1;Q8WUW1-2	3;3;3	3;3;3	3;3;3	122100000	83987000	103640000	Protein BRICK1	BRK1	;;	3	3	3	3	3	2	3	3	2	3	3	2	3	30.5	30.5	30.5	11.945	105	105;75;106	1	33	0	8.8139	30.5	22.9	30.5	1104200000	128130000	70971000	93036000	1	0	3	10
F5H5D3;Q9BQE3;F8VVB9;F8VS66;F8VRZ4;F8VWV9;F8VX09;C9K0S6;F8VRK0;F8W0F6;Q9H853;F8VXZ7	F5H5D3;Q9BQE3;F8VVB9	29;29;15;8;7;5;4;2;2;2;2;1	2;2;0;0;0;0;0;0;0;0;0;0	2;2;0;0;0;0;0;0;0;0;0;0	1095500000	895290000	1144900000	Tubulin alpha-1C chain	TUBA1C;TUBA1B	;;	12	29	2	2	24	26	26	2	2	2	2	2	2	66.1	7.9	7.9	57.73	519	519;449;246;130;112;81;75;47;49;231;241;26	1	90	0	188.27	65.7	66.1	65.9	15722000000	1189000000	1117400000	1171400000	7	6	7	79
F5H5I6;H0Y8R1;H0YAK1;Q12849-5;Q12849;H0YAM1	F5H5I6;H0Y8R1;H0YAK1;Q12849-5;Q12849	12;12;12;12;12;4	12;12;12;12;12;4	12;12;12;12;12;4	194210000	272320000	226330000	G-rich sequence factor 1	GRSF1	;;;;	6	12	12	12	7	9	11	7	9	11	7	9	11	49.7	49.7	49.7	41.634	362	362;417;453;318;480;114	1	112	0	52.028	28.5	36.2	43.9	2881100000	145470000	206550000	283510000	1	4	5	60
F5H5P2;P12694;B4DP47;H0YH31;F5GXU9	F5H5P2;P12694;B4DP47	3;3;2;1;1	3;3;2;1;1	3;3;2;1;1	0	36555000	0	2-oxoisovalerate dehydrogenase subunit alpha, mitochondrial	BCKDHA	;;	5	3	3	3	2	2	0	2	2	0	2	2	0	8.1	8.1	8.1	54.202	479	479;445;448;211;328	1	19	0.0065405	1.9388	4.8	4.8	0	257240000	27226000	41073000	0	1	0	0	2
F5H5Y2;P43307-2;P43307;C9J3L8;C9J5W0;E9PAL7;C9IZQ1;C9JBX5;C9JY01	F5H5Y2;P43307-2;P43307;C9J3L8;C9J5W0;E9PAL7;C9IZQ1	6;6;6;5;5;5;5;2;1	6;6;6;5;5;5;5;2;1	6;6;6;5;5;5;5;2;1	1089000000	1184000000	945790000	Translocon-associated protein subunit alpha	SSR1	;;;;;;	9	6	6	6	5	6	6	5	6	6	5	6	6	29.7	29.7	29.7	29.42	259	259;259;286;265;266;291;298;218;103	1	118	0	129.1	29.7	29.7	29.7	13931000000	1293100000	1489900000	1044100000	6	9	10	91
F5H619;Q86XA9-2;Q86XA9;B5MC49;H7C5W6;E9PB09;F8VQQ6;H0YIW3;Q86XA9-3	F5H619;Q86XA9-2;Q86XA9;B5MC49;H7C5W6;E9PB09	7;7;7;6;4;4;2;2;2	7;7;7;6;4;4;2;2;2	6;6;6;5;4;4;1;2;1	0	0	37978000	HEAT repeat-containing protein 5A	HEATR5A	;;;;;	9	7	7	6	4	3	4	4	3	4	4	3	4	5	5	3.9	222.7	2046	2046;1965;2040;1140;1599;1753;87;896;113	1	39	0	7.0311	2.2	2	2.6	357950000	41024000	29386000	35065000	0	1	2	9
F5H698;Q9P2J5;B4DER1;B4DJ10	F5H698;Q9P2J5;B4DER1;B4DJ10	42;42;41;41	42;42;41;41	42;42;41;41	2181500000	2225300000	2039900000	Leucine--tRNA ligase, cytoplasmic	LARS	;;;	4	42	42	42	37	36	32	37	36	32	37	36	32	46.9	46.9	46.9	129.21	1130	1130;1176;1149;1122	1	507	0	241.88	42.7	41.2	36	25222000000	2398000000	2576000000	1746400000	32	26	22	309
F5H6E2;O00159-3;O00159;O00159-2;I3L501;I3L204;I3L168;I3L3F5;I3L4D4;I3L3Y6	F5H6E2;O00159-3;O00159;O00159-2	17;17;17;16;3;3;2;2;2;2	17;17;17;16;3;3;2;2;2;2	17;17;17;16;3;3;2;2;2;2	273710000	194010000	192310000	Unconventional myosin-Ic	MYO1C	;;;	10	17	17	17	12	10	10	12	10	10	12	10	10	23	23	23	118.99	1039	1039;1044;1063;1028;168;267;134;137;164;170	1	144	0	47.083	15.9	12.7	13.7	2366500000	318220000	252870000	156230000	6	5	4	65
F5H6I0;P61769	F5H6I0;P61769	4;4	4;4	1;1	5659200000	5878300000	6124300000	Beta-2-microglobulin;Beta-2-microglobulin form pI 5.3	B2M	;	2	4	4	1	3	3	3	3	3	3	1	1	1	53.3	53.3	18	13.972	122	122;119	1	83	0	56.628	34.4	34.4	34.4	72760000000	6035300000	6448600000	5623800000	5	6	5	70
F5H6U7;Q9Y3E0;G3V1U5;F5GWD8;F5GXH6	F5H6U7;Q9Y3E0;G3V1U5	3;3;2;1;1	3;3;2;1;1	3;3;2;1;1	201710000	75388000	99265000	Vesicle transport protein GOT1B	GOLT1B	;;	5	3	3	3	3	3	3	3	3	3	3	3	3	18.8	18.8	18.8	14.307	128	128;138;74;40;42	1	59	0	20.312	18.8	18.8	18.8	1594500000	162140000	93107000	103510000	6	5	4	47
F5H6Y0;H3BMM5;Q96AX1;F5H7N5	F5H6Y0;H3BMM5;Q96AX1	4;4;4;1	4;4;4;1	4;4;4;1	21934000	22546000	18468000	Vacuolar protein sorting-associated protein 33A	VPS33A	;;	4	4	4	4	4	3	2	4	3	2	4	3	2	23.7	23.7	23.7	21.226	186	186;538;596;42	1	38	0	5.5082	23.7	19.9	14	249070000	21496000	24705000	11435000	3	2	1	19
F5H715;Q96BJ3;Q96BJ3-2;Q96BJ3-3	F5H715;Q96BJ3	7;7;3;3	7;7;3;3	7;7;3;3	82519000	84722000	82853000	Axin interactor, dorsalization-associated protein	AIDA	;	4	7	7	7	5	5	5	5	5	5	5	5	5	35.5	35.5	35.5	32.021	282	282;306;141;224	1	66	0	13.821	24.8	21.6	25.9	1049900000	85386000	99513000	77786000	1	1	1	22
F5H7B0;Q15477;H7C5N0;H7C4L3	F5H7B0;Q15477	13;13;2;1	13;13;2;1	13;13;2;1	105440000	106370000	108800000	Helicase SKI2W	SKIV2L	;	4	13	13	13	8	10	6	8	10	6	8	10	6	16	16	16	116.48	1053	1053;1246;156;182	1	107	0	22.482	10	12.4	6.7	1369900000	110070000	144350000	48432000	2	5	0	24
F5H7P7;Q96BP3;Q96BP3-2;D6R9Q1;D6RD43;D6RB19;D6RHV0;H0Y8N5	F5H7P7;Q96BP3;Q96BP3-2	5;5;4;2;1;1;1;1	5;5;4;2;1;1;1;1	5;5;4;2;1;1;1;1	34299000	46159000	0	Peptidylprolyl isomerase domain and WD repeat-containing protein 1	PPWD1	;;	8	5	5	5	3	3	2	3	3	2	3	3	2	10.2	10.2	10.2	70.276	616	616;646;490;241;107;107;108;132	1	14	0.000271	3.7173	6.3	7.3	5	211150000	48018000	38611000	14695000	2	1	0	4
F5H843;O60669	F5H843;O60669	2;2	2;2	2;2	42288000	44145000	32178000	Monocarboxylate transporter 2	SLC16A7	;	2	2	2	2	2	2	2	2	2	2	2	2	2	5	5	5	41.718	379	379;478	1	24	0.0002635	3.3582	5	5	5	501170000	42573000	47779000	28864000	2	2	0	14
F5H867	F5H867	9	1	1	11329000	0	0		SLC3A2		1	9	1	1	9	8	4	1	0	0	1	0	0	60	7.4	7.4	14.757	135	135	1	5	1	-2	60	52.6	39.3	123080000	11801000	0	0	0	0	0	0
F5H8E5;Q93009-3;Q93009;H3BND8;F5H2X1	F5H8E5;Q93009-3;Q93009;H3BND8	16;16;16;13;5	16;16;16;13;5	16;16;16;13;5	283040000	295440000	272320000	Ubiquitin carboxyl-terminal hydrolase 7;Ubiquitin carboxyl-terminal hydrolase	USP7	;;;	5	16	16	16	15	11	9	15	11	9	15	11	9	20.2	20.2	20.2	117	1003	1003;1086;1102;909;509	1	152	0	80.933	19.4	15.1	11	3248700000	359260000	345990000	222280000	9	7	5	63
F5H8F7;Q9UBL3-2;Q9UBL3-3;Q9UBL3;H0YBF6	F5H8F7;Q9UBL3-2;Q9UBL3-3;Q9UBL3	4;4;4;4;1	4;4;4;4;1	4;4;4;4;1	37095000	27506000	42450000	Set1/Ash2 histone methyltransferase complex subunit ASH2	ASH2L	;;;	5	4	4	4	3	3	3	3	3	3	3	3	3	10.6	10.6	10.6	55.324	489	489;501;534;628;192	1	31	0	9.9211	6.7	6.7	7	399300000	38588000	26921000	40998000	1	1	1	13
F5H8H2;Q03426;F5H092;B7Z1C2;F5H163;F5H368;F5GXC0	F5H8H2;Q03426;F5H092;B7Z1C2	4;4;2;2;1;1;1	4;4;2;2;1;1;1	4;4;2;2;1;1;1	68989000	66910000	70985000	Mevalonate kinase	MVK	;;;	7	4	4	4	3	3	3	3	3	3	3	3	3	17.4	17.4	17.4	37.171	344	344;396;200;202;83;117;170	1	49	0	4.5414	15.1	15.1	15.1	763570000	63632000	75074000	54318000	0	1	0	6
F6S0T5;O60341;O60341-2;R4GMQ1;R4GMP9	F6S0T5;O60341;O60341-2	13;13;13;3;3	13;13;13;3;3	13;13;13;3;3	90581000	89168000	97110000	Lysine-specific histone demethylase 1A	KDM1A	;;	5	13	13	13	6	6	6	6	6	6	6	6	6	24.7	24.7	24.7	95.222	876	876;852;876;189;301	1	76	0	40.341	11.4	9.7	11.9	1248000000	79396000	112100000	88314000	1	2	2	25
F6T1Q0;Q6L8Q7-2;Q6L8Q7	F6T1Q0;Q6L8Q7-2;Q6L8Q7	8;8;8	8;8;8	8;8;8	156300000	121620000	100630000	2,5-phosphodiesterase 12	PDE12	;;	3	8	8	8	5	6	4	5	6	4	5	6	4	30.9	30.9	30.9	52.175	472	472;535;609	1	65	0	17.097	14.6	22.7	11.9	1355700000	125380000	86951000	100760000	3	5	0	28
F6TR53;Q53T59;B5MC96	F6TR53;Q53T59;B5MC96	3;3;2	3;3;2	3;3;2	0	0	46561000	HCLS1-binding protein 3	HS1BP3	;;	3	3	3	3	2	2	3	2	2	3	2	2	3	16.9	16.9	16.9	23.6	213	213;392;199	1	28	0	7.3297	13.1	13.1	16.9	418140000	32690000	32614000	30842000	0	0	1	5
F6U1T9;D3YTA9;P63098;H7BYZ3	F6U1T9;D3YTA9;P63098;H7BYZ3	8;8;8;6	8;8;8;6	8;8;8;6	250020000	232990000	233690000	Calcineurin subunit B type 1	PPP3R1	;;;	4	8	8	8	7	7	6	7	7	6	7	7	6	65.6	65.6	65.6	18.208	160	160;189;170;331	1	86	0	39.36	60.6	60.6	50.6	2982300000	309400000	278980000	183840000	6	4	7	60
F6UJY9;J9JIE9;E7EWH8;F6UJY1;Q5T013-3;Q5T013;H0YB18;H0YB70;Q5T015;Q5T013-2;Q5T013-4	F6UJY9;J9JIE9;E7EWH8;F6UJY1;Q5T013-3;Q5T013;H0YB18;H0YB70;Q5T015;Q5T013-2;Q5T013-4	2;2;2;2;2;2;1;1;1;1;1	2;2;2;2;2;2;1;1;1;1;1	2;2;2;2;2;2;1;1;1;1;1	23541000	30030000	28595000	Hydroxypyruvate isomerase;Putative hydroxypyruvate isomerase	HYI	;;;;;;;;;;	11	2	2	2	2	2	2	2	2	2	2	2	2	15	15	15	23.031	213	213;238;276;302;247;277;161;186;229;174;204	1	28	0	10.224	15	15	15	377100000	21894000	32681000	34278000	1	1	1	16
F6V6Z1;Q969Z3-2;Q969Z3;Q5VT66;Q5VT66-2	F6V6Z1;Q969Z3-2;Q969Z3;Q5VT66;Q5VT66-2	1;1;1;1;1	1;1;1;1;1	1;1;1;1;1	0	0	16101000	Mitochondrial amidoxime reducing component 2;Mitochondrial amidoxime-reducing component 1	MARC2;MARC1	;;;;	5	1	1	1	1	1	1	1	1	1	1	1	1	16	16	16	10.2	94	94;257;335;337;354	1	6	0.0026921	2.4355	16	16	16	92766000	22051000	23547000	14321000	0	1	1	2
F6XY72	F6XY72	7	1	1	0	36932000	0		NME2		1	7	1	1	6	6	5	1	1	0	1	1	0	90.9	13	13	8.6687	77	77	1	11	0.0029176	2.3595	79.2	90.9	66.2	439120000	4684300	41496000	0	0	0	0	3
F8VQ10;Q13838;Q13838-2;Q5STU3;B4DP52;F6WLT2;F6UJC5;F6S4E6;F6TRA5;B4DIJ6;H0Y400;F6QYI9;F6R6M7;H0YCC6;K7EN69;K7ENP6;F6QWI5;K7EL56;K7EIL8;F6U6E2;F6S2B7;F6SXL5;E7EMX2;K7EN25	F8VQ10;Q13838;Q13838-2;Q5STU3;B4DP52;F6WLT2;F6UJC5;F6S4E6;F6TRA5	22;22;22;19;18;15;12;11;11;9;7;6;6;5;4;3;3;3;3;3;3;3;3;3	22;22;22;19;18;15;12;11;11;9;7;6;6;5;4;3;3;3;3;3;3;3;3;3	10;10;10;9;10;6;7;3;3;4;3;1;1;4;0;0;0;0;0;0;0;0;0;0	4247700000	4449900000	4664800000	Spliceosome RNA helicase DDX39B	DDX39B;hCG_2005638	;;;;;;;;	24	22	22	10	21	22	20	21	22	20	10	10	9	57.1	57.1	27.8	50.745	443	443;428;443;425;350;289;245;231;238;243;187;187;197;141;130;92;96;108;125;125;132;136;139;176	1	391	0	247.38	56.9	57.1	56.7	54106000000	4744800000	5204300000	4363800000	25	29	24	298
F8VQD9;Q9BSB4	F8VQD9;Q9BSB4	1;1	1;1	1;1	0	0	19353000	Autophagy-related protein 101	ATG101	;	2	1	1	1	1	1	1	1	1	1	1	1	1	5.3	5.3	5.3	21.926	190	190;218	1	10	0.00025615	2.9346	5.3	5.3	5.3	99598000	16420000	17965000	17213000	1	1	1	10
F8VSC5;Q6P3W7;F8VPW3;H0YIK6	F8VSC5;Q6P3W7	5;5;1;1	5;5;1;1	5;5;1;1	51558000	48071000	0	SCY1-like protein 2	SCYL2	;	4	5	5	5	4	4	1	4	4	1	4	4	1	10.6	10.6	10.6	77.053	681	681;929;76;115	1	38	0	9.6591	7.9	8.2	1.8	485400000	62477000	76070000	23512000	3	3	1	12
F8VU90;Q9NYL4-2;Q9NYL4;H0YHM7;E9PAR0	F8VU90;Q9NYL4-2;Q9NYL4	3;3;3;1;1	3;3;3;1;1	3;3;3;1;1	0	74802000	0	Peptidyl-prolyl cis-trans isomerase;Peptidyl-prolyl cis-trans isomerase FKBP11	FKBP11	;;	5	3	3	3	1	3	1	1	3	1	1	3	1	21.4	21.4	21.4	19.814	182	182;146;201;63;99	1	32	0	31.963	5.5	21.4	9.9	766070000	49540000	132760000	18825000	1	2	0	14
F8VV49;F5H7C2;F8VVY5;B7Z2Q5;P78560	F8VV49;F5H7C2;F8VVY5;B7Z2Q5;P78560	1;1;1;1;1	1;1;1;1;1	1;1;1;1;1	2901300	0	0	Death domain-containing protein CRADD	CRADD	;;;;	5	1	1	1	1	0	0	1	0	0	1	0	0	9.6	9.6	9.6	13.168	115	115;121;130;103;199	1	3	0.0044917	2.0386	9.6	0	0	9435200	3022300	0	0	0	0	0	1
F8VV52;Q9NZN8-4;Q9NZN8-5;Q9NZN8;H0YHT8;H0YI80;F8VQD8;H0YI11;F8VVY1;H0YH84;F8VUB4;F8VX63;F8VP97;Q9NZN8-3;Q9NZN8-2	F8VV52;Q9NZN8-4;Q9NZN8-5;Q9NZN8;H0YHT8;H0YI80;F8VQD8;H0YI11;F8VVY1;H0YH84;F8VUB4;F8VX63;F8VP97;Q9NZN8-3;Q9NZN8-2	2;2;2;2;1;1;1;1;1;1;1;1;1;1;1	2;2;2;2;1;1;1;1;1;1;1;1;1;1;1	2;2;2;2;1;1;1;1;1;1;1;1;1;1;1	0	18565000	0	CCR4-NOT transcription complex subunit 2	CNOT2	;;;;;;;;;;;;;;	15	2	2	2	1	2	1	1	2	1	1	2	1	8.3	8.3	8.3	58.62	531	531;475;490;540;46;99;131;182;182;186;196;217;321;191;365	1	12	0.0049575	2.0243	5.6	8.3	2.6	137970000	20963000	20859000	0	1	1	1	5
F8VV56;F8W022;F8VWK8;C9JV86;P08962-3;P08962-2;P08962;F8VNT9	F8VV56;F8W022;F8VWK8;C9JV86;P08962-3;P08962-2;P08962;F8VNT9	5;5;5;5;5;5;5;3	5;5;5;5;5;5;5;3	5;5;5;5;5;5;5;3	1036500000	938430000	791660000	Tetraspanin;CD63 antigen	CD63	;;;;;;;	8	5	5	5	2	2	3	2	2	3	2	2	3	29	29	29	16.021	145	145;215;217;236;156;215;238;133	1	54	0	25.062	12.4	12.4	13.8	13503000000	1193500000	1093200000	767040000	3	3	2	38
F8VVA7;P61923;F8VYZ4;P61923-5;P61923-4;F8VXB1;F8W156;F8W651;F8VUC5;F8VXR1;P61923-3;F8VYK5;F8VYE0;P61923-2	F8VVA7;P61923;F8VYZ4;P61923-5;P61923-4;F8VXB1;F8W156;F8W651;F8VUC5;F8VXR1;P61923-3	6;6;5;5;5;4;4;4;3;3;3;2;2;2	6;6;5;5;5;4;4;4;3;3;3;2;2;2	6;6;5;5;5;4;4;4;3;3;3;2;2;2	355920000	388480000	323450000	Coatomer subunit zeta-1	COPZ1	;;;;;;;;;;	14	6	6	6	4	4	5	4	4	5	4	4	5	52	52	52	22.34	198	198;177;163;160;185;92;107;119;95;138;154;89;164;126	1	84	0	170.88	29.8	29.8	35.4	4715300000	360470000	388590000	337730000	6	8	6	78
F8VW96;Q16527;F8VQR7	F8VW96;Q16527;F8VQR7	5;5;4	5;5;4	5;5;4	158620000	146260000	142600000	Cysteine and glycine-rich protein 2	CSRP2	;;	3	5	5	5	4	3	5	4	3	5	4	3	5	25.9	25.9	25.9	26.736	243	243;193;187	1	57	0	15.228	21.8	15.6	25.9	1623100000	138360000	67667000	180480000	1	2	2	21
F8VX04;Q9H2H9;F8VX12	F8VX04;Q9H2H9	4;4;1	4;4;1	4;4;1	0	0	114790000	Sodium-coupled neutral amino acid transporter 1	SLC38A1	;	3	4	4	4	1	1	3	1	1	3	1	1	3	7.2	7.2	7.2	56.195	503	503;487;78	1	29	0	9.4182	1.6	1.6	5.6	1170500000	26983000	23185000	115240000	1	0	2	20
F8VXC8;Q8TAQ2-2;Q8TAQ2-3;Q8TAQ2;F8VZW6	F8VXC8;Q8TAQ2-2;Q8TAQ2-3;Q8TAQ2	11;11;11;11;1	11;11;11;11;1	4;4;4;4;1	124740000	137040000	176960000	SWI/SNF complex subunit SMARCC2	SMARCC2	;;;	5	11	11	4	8	7	6	8	7	6	2	2	3	9.9	9.9	4.4	136.18	1245	1245;1130;1152;1214;105	1	88	0	18.705	6.1	5.6	5.3	1650900000	170220000	156660000	109890000	2	2	1	24
F8VXG7;Q99590-2;Q99590	F8VXG7;Q99590-2;Q99590	2;2;2	2;2;2	2;2;2	0	0	14690000	Protein SCAF11	SCAF11	;;	3	2	2	2	0	1	2	0	1	2	0	1	2	1.7	1.7	1.7	142.6	1271	1271;1148;1463	1	6	0.0024558	2.4786	0	1	1.7	49300000	0	9225500	13066000	0	0	1	2
F8VXI9;Q14161-4;Q14161-3;Q14161;R4GNG3;F8W7V0;F8WAK2;Q14161-9;Q14161-10;Q14161-8;Q14161-5;Q14161-11;Q14161-7;Q14161-6	F8VXI9;Q14161-4;Q14161-3;Q14161;R4GNG3;F8W7V0;F8WAK2;Q14161-9;Q14161-10;Q14161-8;Q14161-5;Q14161-11;Q14161-7;Q14161-6	6;6;6;6;5;5;5;5;5;5;5;4;4;4	6;6;6;6;5;5;5;5;5;5;5;4;4;4	5;5;5;5;4;4;4;4;4;4;4;3;3;3	37388000	0	39467000	ARF GTPase-activating protein GIT2	GIT2	;;;;;;;;;;;;;	14	6	6	5	3	3	2	3	3	2	2	2	2	8.8	8.8	7.6	78.866	708	708;709;744;759;641;649;681;648;681;694;729;631;646;661	1	37	0	6.6974	4	4.5	2.5	394620000	37065000	41890000	26139000	1	1	2	12
F8VXY3;P00973-2;P00973-4;P00973;P00973-3;H0YI20;H0YIB8;F8VUC8;F8VPW7	F8VXY3;P00973-2;P00973-4;P00973;P00973-3;H0YI20	6;6;6;6;6;4;2;2;1	6;6;6;6;6;4;2;2;1	6;6;6;6;6;4;2;2;1	158240000	137180000	121150000	2-5-oligoadenylate synthase 1	OAS1	;;;;;	9	6	6	6	6	5	4	6	5	4	6	5	4	22.8	22.8	22.8	41.474	360	360;364;382;400;414;302;130;177;83	1	69	0	27.146	22.8	18.3	16.1	1641200000	211580000	189890000	109100000	4	4	2	36
F8VY35;F5H4R6;H0YIV4;P55209-2;P55209;F8W0J6;H0YH88;F8W020;F8VUX1;H0YHC3;F8VXI6;F8VVB5;F8VUC3;B7Z4K9	F8VY35;F5H4R6;H0YIV4;P55209-2;P55209;F8W0J6;H0YH88;F8W020;F8VUX1;H0YHC3;F8VXI6	10;10;10;10;10;8;7;7;7;6;6;4;1;1	9;9;9;9;9;7;6;6;6;5;5;3;1;1	1;1;1;1;1;1;0;1;1;0;1;1;0;0	1545100000	1681900000	2042200000	Nucleosome assembly protein 1-like 1	NAP1L1	;;;;;;;;;;	14	10	9	1	10	9	8	9	8	7	1	1	1	55.3	51.5	7.2	31.02	264	264;383;385;368;391;379;177;207;237;198;215;161;200;208	1	165	0	265.84	55.3	48.5	51.1	20640000000	1819300000	1979600000	1137400000	9	8	7	112
F8VYH9;F8VTV8;F8VWX7;P11802;F8VXD2;F8VZZ0;F8VZ51;F8W1L8;B4DNF9;F8VYY1;Q96BE9	F8VYH9;F8VTV8;F8VWX7;P11802;F8VXD2;F8VZZ0;F8VZ51;F8W1L8;B4DNF9	6;6;6;6;4;4;4;3;3;2;2	5;5;5;5;3;3;3;3;2;2;2	5;5;5;5;3;3;3;3;2;2;2	130130000	108180000	119210000	Cyclin-dependent kinase 4	CDK4	;;;;;;;;	11	6	5	5	5	4	6	4	3	5	4	3	5	46.5	41.8	41.8	18.685	170	170;201;203;303;132;186;208;115;183;74;111	1	55	0	14.528	36.5	29.4	46.5	1416800000	142460000	69508000	114030000	2	2	1	20
F8W111;P14384;F8VVI6;H0YHN7	F8W111;P14384;F8VVI6	4;4;2;1	4;4;2;1	4;4;2;1	41883000	45263000	38953000	Carboxypeptidase M	CPM	;;	4	4	4	4	2	4	3	2	4	3	2	4	3	21.7	21.7	21.7	28.314	249	249;443;136;198	1	37	0	12.636	11.2	21.7	15.3	492050000	29417000	83183000	36996000	2	3	3	23
F8W1A4;P54819-2;P54819;P54819-3;F8VZG5;F8VY04;P54819-5;P54819-6;P54819-4;G3V213;F8VPP1	F8W1A4;P54819-2;P54819;P54819-3;F8VZG5;F8VY04;P54819-5;P54819-6;P54819-4;G3V213	11;11;11;10;9;9;9;8;7;6;2	11;11;11;10;9;9;9;8;7;6;2	11;11;11;10;9;9;9;8;7;6;2	965280000	996660000	934110000	Adenylate kinase 2, mitochondrial;Adenylate kinase 2, mitochondrial;Adenylate kinase 2, mitochondrial, N-terminally processed	AK2	;;;;;;;;;	11	11	11	11	11	10	11	11	10	11	11	10	11	60.8	60.8	60.8	25.63	232	232;232;239;202;162;190;224;192;131;133;42	1	214	0	103.27	60.8	55.2	60.8	11672000000	1266300000	1332100000	884540000	8	10	10	121
F8W1T6;Q15434;F8VZR4;F8VQS9	F8W1T6;Q15434	3;3;1;1	2;2;1;1	2;2;1;1	0	21755000	0	RNA-binding motif, single-stranded-interacting protein 2	RBMS2	;	4	3	2	2	1	3	1	0	2	0	0	2	0	9.6	6.7	6.7	37.186	344	344;407;60;84	1	10	0.00026261	3.3092	2.9	9.6	2.9	67294000	0	24443000	0	0	2	0	2
F8W1Z6;Q7Z3U7-2;F8VWA6;Q7Z3U7-5;Q7Z3U7-4;Q7Z3U7;Q7Z3U7-3;F8VZV1	F8W1Z6;Q7Z3U7-2;F8VWA6;Q7Z3U7-5;Q7Z3U7-4;Q7Z3U7;Q7Z3U7-3	7;7;7;7;7;7;4;2	7;7;7;7;7;7;4;2	7;7;7;7;7;7;4;2	71585000	70270000	81057000	Protein MON2 homolog	MON2	;;;;;;	8	7	7	7	6	6	4	6	6	4	6	6	4	4.7	4.7	4.7	185.85	1675	1675;1676;1688;1711;1717;1718;586;1072	1	71	0	10.027	4.2	3.9	2.6	860940000	81378000	69351000	41728000	5	2	2	32
F8W6I7;P09651-3;P09651-2;P09651;F8VZ49;Q32P51;F8VTQ5;H0YH80;F8W646;F8VYN5	F8W6I7;P09651-3;P09651-2;P09651;F8VZ49;Q32P51;F8VTQ5;H0YH80	17;17;17;17;12;12;10;9;6;5	16;16;16;16;11;11;9;9;6;4	15;15;15;15;11;10;9;8;6;4	4020300000	4789400000	4733800000	Heterogeneous nuclear ribonucleoprotein A1;Heterogeneous nuclear ribonucleoprotein A1, N-terminally processed;Heterogeneous nuclear ribonucleoprotein A1-like 2	HNRNPA1;HNRNPA1L2	;;;;;;;	10	17	16	15	15	16	16	14	15	15	13	14	14	59.9	57	54.7	33.155	307	307;267;320;372;231;320;145;191;156;113	1	323	0	323.31	55.7	59.3	59.6	61643000000	4258500000	4879300000	4366300000	21	24	21	234
F8W726;Q14157-4;Q14157-1;Q14157-3;Q14157;Q14157-5;Q5VU77;Q5VU79;Q5VU78;Q5VU81;Q5VU80;H0Y5H6;H7C2T8	F8W726;Q14157-4;Q14157-1;Q14157-3;Q14157;Q14157-5	25;25;25;25;25;25;12;9;9;8;8;2;2	25;25;25;25;25;25;12;9;9;8;8;2;2	25;25;25;25;25;25;12;9;9;8;8;2;2	940790000	1040300000	1088200000	Ubiquitin-associated protein 2-like	UBAP2L	;;;;;	13	25	25	25	24	20	21	24	20	21	24	20	21	39.2	39.2	39.2	113.5	1078	1078;976;983;1068;1087;1104;350;265;280;182;234;383;399	1	321	0	141.21	39.2	32.2	34.2	11218000000	1163400000	1327700000	1001900000	17	14	19	169
F8W727;P62910;D3YTB1;D3YTI8	F8W727;P62910;D3YTB1	10;10;9;2	10;10;9;2	10;10;9;2	2574000000	2601100000	2798600000	60S ribosomal protein L32	RPL32	;;	4	10	10	10	9	10	7	9	10	7	9	10	7	54.2	54.2	54.2	17.962	153	153;135;133;62	1	150	0	110.99	52.9	54.2	43.1	32364000000	3003600000	3192000000	2247100000	7	7	7	86
F8W733;Q9NXR7-4;Q9NXR7-3;Q9NXR7;Q9NXR7-1	F8W733;Q9NXR7-4;Q9NXR7-3;Q9NXR7;Q9NXR7-1	1;1;1;1;1	1;1;1;1;1	1;1;1;1;1	0	0	34231000	BRCA1-A complex subunit BRE	BRE	;;;;	5	1	1	1	1	1	1	1	1	1	1	1	1	4.9	4.9	4.9	31.972	284	284;376;379;383;415	1	12	0	7.3125	4.9	4.9	4.9	411790000	44954000	45100000	30446000	1	1	1	9
F8W7C6;H7C123;H7C2C5;Q96L21;H7C2U2	F8W7C6;H7C123;H7C2C5	11;6;6;5;1	1;0;0;0;0	1;0;0;0;0	223320000	218110000	175860000		RPL10	;;	5	11	1	1	10	9	10	1	1	1	1	1	1	54.6	11	11	18.592	163	163;91;131;214;28	1	24	0	51.549	54.6	54.6	54.6	2732500000	232160000	245250000	154980000	2	3	2	25
F8W7D6;F5H039;Q9NQX3;Q9NQX3-2;H0YJR5;H0YJ30;G3V582	F8W7D6;F5H039;Q9NQX3;Q9NQX3-2	3;3;3;3;1;1;1	3;3;3;3;1;1;1	3;3;3;3;1;1;1	38027000	38414000	37106000	Gephyrin;Molybdopterin adenylyltransferase;Molybdopterin molybdenumtransferase	GPHN	;;;	7	3	3	3	2	2	2	2	2	2	2	2	2	6.1	6.1	6.1	76.331	705	705;782;736;769;201;280;380	1	27	0	5.9719	4.8	4.8	4.1	360150000	28473000	34224000	27078000	0	1	0	11
F8W7G7;P02751-5;P02751-17;P02751-3;P02751;P02751-7;P02751-15;P02751-4;P02751-6;P02751-11;P02751-10;P02751-9;P02751-14;P02751-13;P02751-8;P02751-12;H0Y7Z1;P02751-2;P02751-16;H0Y4K8	F8W7G7;P02751-5;P02751-17;P02751-3;P02751;P02751-7;P02751-15;P02751-4;P02751-6;P02751-11;P02751-10;P02751-9;P02751-14;P02751-13;P02751-8;P02751-12	19;19;19;19;19;19;19;18;18;18;17;17;17;17;17;14;8;2;2;1	19;19;19;19;19;19;19;18;18;18;17;17;17;17;17;14;8;2;2;1	19;19;19;19;19;19;19;18;18;18;17;17;17;17;17;14;8;2;2;1	177540000	184330000	190700000	Fibronectin;Anastellin;Ugl-Y1;Ugl-Y2;Ugl-Y3	FN1	;;;;;;;;;;;;;;;	20	19	19	19	13	11	11	13	11	11	13	11	11	13.7	13.7	13.7	243.23	2211	2211;2211;2330;2355;2386;2446;2477;2031;2184;2386;2176;2240;2265;2267;2296;2008;1103;642;657;241	1	160	0	61.88	9.5	7.8	7.6	2323200000	231830000	193260000	123850000	7	7	3	76
F8W7Q4;Q96A26;E9PH05	F8W7Q4;Q96A26;E9PH05	4;4;3	4;4;3	4;4;3	123870000	180580000	156970000	Protein FAM162A	FAM162A	;;	3	4	4	4	3	3	2	3	3	2	3	3	2	25	25	25	16.515	144	144;154;141	1	43	0	24.764	24.3	24.3	19.4	1902100000	150570000	218360000	107990000	3	5	2	35
F8W8J4;Q9NZM1-6;Q9NZM1;Q9NZM1-2;Q9NZM1-5	F8W8J4;Q9NZM1-6;Q9NZM1;Q9NZM1-2;Q9NZM1-5	94;94;94;87;68	94;94;94;87;68	3;3;3;3;3	5060100000	5185700000	5244800000	Myoferlin	MYOF	;;;;	5	94	94	3	80	80	78	80	80	78	2	2	3	56.8	56.8	1.8	234.65	2061	2061;2048;2061;2019;1577	1	1259	0	323.31	49.5	49.1	46.9	62137000000	4996200000	5565100000	4593700000	57	65	67	763
F8W8R3;P49005;C9JLE1;C9JHC7;C9IZD2;C9J8Z7	F8W8R3;P49005;C9JLE1;C9JHC7	5;5;3;3;1;1	5;5;3;3;1;1	5;5;3;3;1;1	43640000	40051000	49231000	DNA polymerase delta subunit 2	POLD2	;;;	6	5	5	5	3	3	4	3	3	4	3	3	4	18.2	18.2	18.2	49.612	455	455;469;220;257;148;155	1	45	0	11.745	9.9	9.9	14.7	460200000	49415000	37958000	52202000	2	2	1	16
F8W8S0;Q13409-3;Q13409-7;Q13409-2;Q13409;Q13409-6;Q13409-5;E7EQL5;E7EV09;E7ET01;E7ETL8;E7EQU2;E7ESD3;E7EMU4;E9PGG1;E7EUM4;E7ERR6;E7ERH4;E7EU01	F8W8S0;Q13409-3;Q13409-7;Q13409-2;Q13409;Q13409-6;Q13409-5;E7EQL5	17;17;17;17;17;16;16;11;8;5;5;5;5;5;3;3;3;3;2	17;17;17;17;17;16;16;11;8;5;5;5;5;5;3;3;3;3;2	17;17;17;17;17;16;16;11;8;5;5;5;5;5;3;3;3;3;2	426340000	644400000	561910000	Cytoplasmic dynein 1 intermediate chain 2	DYNC1I2	;;;;;;;	19	17	17	17	15	13	11	15	13	11	15	13	11	41.7	41.7	41.7	71.349	638	638;612;630;632;638;611;637;305;250;173;184;185;187;214;110;137;139;151;121	1	230	0	115.07	35.6	30.7	23.4	7178100000	512760000	795780000	548750000	10	14	6	133
F8W8S3;H0YKT5;H0YKN8;H0YL70;Q04726-2;Q04726-7;Q04726-3;Q04726-6;Q04726-5;Q04726-4;Q04726;F5H7D6;H0YNT2;H0YNI7;H0YLI3;B3KQ29;H0YKH0;H0YLW9;G8JLG4;F8W9R0;Q04727-2;Q04727-4;Q04727;Q04727-3;B4DE62;K7EMK7;Q04725-2;Q04725;K7EJR7;Q04725-3	F8W8S3;H0YKT5;H0YKN8;H0YL70;Q04726-2;Q04726-7;Q04726-3;Q04726-6;Q04726-5;Q04726-4;Q04726;F5H7D6;H0YNT2;H0YNI7;H0YLI3	7;7;7;7;7;7;7;7;7;7;7;6;6;5;4;3;3;3;3;3;3;3;3;3;2;2;2;2;1;1	7;7;7;7;7;7;7;7;7;7;7;6;6;5;4;3;3;3;3;3;3;3;3;3;2;2;2;2;1;1	4;4;4;4;4;4;4;4;4;4;4;3;3;2;4;0;3;3;0;0;0;0;0;0;0;0;0;0;0;0	76843000	80413000	71113000	Transducin-like enhancer protein 3	TLE3	;;;;;;;;;;;;;;	30	7	7	4	2	4	4	2	4	4	2	4	3	14.5	14.5	9	82.611	764	764;774;778;782;760;762;764;767;769;772;772;699;716;353;611;410;445;448;704;805;704;748;773;805;410;744;621;743;280;706	1	57	0	9.8305	3.1	9	10.1	1034000000	30896000	76421000	96029000	2	2	1	23
F8W8Z9;Q8N4H5;Q8N4H5-3;Q8N4H5-2;H3BUX3;H0YFG9	F8W8Z9;Q8N4H5;Q8N4H5-3;Q8N4H5-2	5;5;5;5;2;2	5;5;5;5;2;2	5;5;5;5;2;2	246810000	199880000	240220000	Mitochondrial import receptor subunit TOM5 homolog	TOMM5	;;;	6	5	5	5	4	4	5	4	4	5	4	4	5	35.7	35.7	35.7	10.976	98	98;51;85;92;64;71	1	52	0	6.8785	27.6	27.6	35.7	3188700000	282480000	261540000	274620000	3	2	4	34
F8W998;H9KV37;O14936-3;O14936-4;O14936-6;O14936-2;O14936;Q5JS79;Q5JS72;Q5JS74;O14936-5	F8W998;H9KV37;O14936-3;O14936-4;O14936-6;O14936-2;O14936;Q5JS79;Q5JS72;Q5JS74;O14936-5	4;4;4;4;4;4;4;2;2;2;2	4;4;4;4;4;4;4;2;2;2;2	4;4;4;4;4;4;4;2;2;2;2	36577000	37927000	54526000	Peripheral plasma membrane protein CASK	CASK	;;;;;;;;;;	11	4	4	4	2	2	3	2	2	3	2	2	3	6.6	6.6	6.6	103.28	909	909;921;897;898;909;921;926;381;518;590;518	1	33	0	15.667	3.3	3.3	4.4	512240000	28843000	30741000	47370000	1	2	2	17
F8W9B5;O43663-3;O43663-2;O43663-4;O43663;H0YL53	F8W9B5;O43663-3;O43663-2;O43663-4;O43663;H0YL53	2;2;2;2;2;1	2;2;2;2;2;1	2;2;2;2;2;1	0	0	16127000	Protein regulator of cytokinesis 1	PRC1	;;;;;	6	2	2	2	1	2	1	1	2	1	1	2	1	3.2	3.2	3.2	66.147	566	566;525;576;606;620;195	1	13	0.0097439	1.6455	1.2	3.2	1.2	223020000	22043000	22289000	14343000	1	2	0	10
F8W9U3;Q96IU4;B4DQI4;Q96IU4-2	F8W9U3;Q96IU4;B4DQI4	7;7;6;2	7;7;6;2	7;7;6;2	275010000	231120000	222930000	Alpha/beta hydrolase domain-containing protein 14B	ABHD14B	;;	4	7	7	7	4	6	6	4	6	6	4	6	6	38.5	38.5	38.5	22.38	208	208;210;188;172	1	79	0	13.279	26.9	33.7	35.1	2795600000	201580000	280820000	178730000	3	5	4	38
F8W9X7;Q567U6;H7C050	F8W9X7;Q567U6	8;8;1	8;8;1	8;8;1	56117000	63114000	56654000	Coiled-coil domain-containing protein 93	CCDC93	;	3	8	8	8	3	3	4	3	3	4	3	3	4	15.2	15.2	15.2	73.041	630	630;631;91	1	53	0	13.822	5.4	4.6	6.7	686540000	43012000	40807000	48932000	1	3	1	22
F8WA11;Q7Z460-2;Q7Z460-4;F5GWS0;Q7Z460-3;Q7Z460;F5H2E2;F5GWM7;H0Y5T1;C9J151	F8WA11;Q7Z460-2;Q7Z460-4;F5GWS0;Q7Z460-3;Q7Z460;F5H2E2;F5GWM7	11;11;11;11;11;11;8;8;3;1	7;7;7;7;7;7;4;4;1;1	7;7;7;7;7;7;4;4;1;1	47645000	55495000	52044000	CLIP-associating protein 1	CLASP1	;;;;;;;	10	11	7	7	7	7	8	4	3	5	4	3	5	9.4	6.8	6.8	164.49	1494	1494;1471;1477;1478;1494;1538;1245;1255;704;150	1	50	0	17.399	6.4	5.6	7.6	565770000	46165000	42615000	62122000	1	1	4	22
F8WAJ0;Q9H8H2;Q9H8H2-2;Q9H8H2-4;B4E3G7;Q9H8H2-3	F8WAJ0;Q9H8H2;Q9H8H2-2;Q9H8H2-4	4;4;3;2;1;1	4;4;3;2;1;1	4;4;3;2;1;1	0	32327000	0	Probable ATP-dependent RNA helicase DDX31	DDX31	;;;	6	4	4	4	2	2	0	2	2	0	2	2	0	6.8	6.8	6.8	80.945	722	722;851;778;585;160;319	1	22	0	3.8697	3.6	4.4	0	240010000	6033500	36564000	0	1	2	0	8
F8WAK8;Q8N3U4;Q8N3U4-2;B1AMT4;B1AMT1;B1AMT2;B1AMT3;B1AMT0;C9JJQ0;Q9UJ98-2;Q9UJ98-3;Q9UJ98	F8WAK8;Q8N3U4;Q8N3U4-2;B1AMT4;B1AMT1;B1AMT2;B1AMT3	4;4;4;3;2;2;2;1;1;1;1;1	4;4;4;3;2;2;2;1;1;1;1;1	3;3;3;2;1;1;1;0;0;1;1;1	27625000	29056000	31767000	Cohesin subunit SA-2	STAG2	;;;;;;	12	4	4	3	2	3	3	2	3	3	2	3	3	4	4	2.7	134.07	1162	1162;1231;1268;548;154;169;207;115;232;888;1167;1225	1	23	0	6.261	1.9	2.7	2.7	221670000	21820000	35945000	28161000	1	1	2	8
F8WAS3;Q16718;C9IZN5;H7BYD0;Q16718-2	F8WAS3;Q16718;C9IZN5;H7BYD0;Q16718-2	4;4;3;3;3	4;4;3;3;3	4;4;3;3;3	92950000	105350000	114050000	NADH dehydrogenase [ubiquinone] 1 alpha subcomplex subunit 5	NDUFA5	;;;;	5	4	4	4	3	3	4	3	3	4	3	3	4	51.4	51.4	51.4	7.8423	70	70;116;93;112;116	1	54	0	12.176	37.1	37.1	51.4	1315000000	57830000	142020000	92262000	1	2	1	28
F8WAX7;A8K0M9;Q9Y6D0	F8WAX7;A8K0M9;Q9Y6D0	2;2;2	2;2;2	2;2;2	20770000	0	0	Selenoprotein K	SELK	;;	3	2	2	2	2	1	1	2	1	1	2	1	1	29.2	29.2	29.2	8.2912	72	72;91;94	1	13	0.0022217	2.5483	29.2	12.5	12.5	131070000	20199000	11617000	5632300	1	0	0	4
F8WBS7	F8WBS7	1	1	1	0	0	22592000		HNF4A		1	1	1	1	0	0	1	0	0	1	0	0	1	14	14	14	11.953	107	107	1	6	0.0040428	2.1117	0	0	14	327950000	0	0	20094000	0	0	0	5
F8WCF6;P59998;P59998-3;F8WDD7;P59998-2;H7C0A3;R4GN08;P59998-4;F8WE39;F8WDW3	F8WCF6;P59998;P59998-3;F8WDD7;P59998-2;H7C0A3	11;11;10;7;7;6;5;5;3;2	11;11;10;7;7;6;5;5;3;2	11;11;10;7;7;6;5;5;3;2	1558900000	1458300000	1322600000	Actin-related protein 2/3 complex subunit 4	ARPC4-TTLL3;ARPC4	;;;;;	10	11	11	11	11	9	10	11	9	10	11	9	10	70.7	70.7	70.7	21.058	181	181;168;187;113;625;167;77;78;47;44	1	163	0	118.3	70.7	53.6	59.7	17915000000	1669900000	1709900000	1191300000	9	10	7	98
F8WCP6;Q7Z4S6-6;Q7Z4S6-3;Q7Z4S6-5;Q7Z4S6-2;Q7Z4S6;Q7Z4S6-4;H0YIM7;H0YI78;H0YHT2;Q2M1P5;O75037-3;O75037-4;O75037-2;O75037	F8WCP6;Q7Z4S6-6;Q7Z4S6-3;Q7Z4S6-5;Q7Z4S6-2;Q7Z4S6;Q7Z4S6-4;H0YIM7	6;6;6;6;6;6;6;3;1;1;1;1;1;1;1	6;6;6;6;6;6;6;3;1;1;1;1;1;1;1	5;5;5;5;5;5;5;2;1;1;0;0;0;0;0	56129000	58159000	0	Kinesin-like protein KIF21A;Kinesin-like protein	KIF21A	;;;;;;;	15	6	6	5	5	4	2	5	4	2	4	4	1	5.7	5.7	5	187.46	1675	1675;1621;1627;1637;1661;1674;1675;290;655;975;1343;1610;1623;1624;1637	1	38	0	7.5608	3.9	4.2	1.4	516240000	64368000	69427000	25363000	2	1	1	15
F8WE41;P52298-3;P52298	F8WE41;P52298-3;P52298	1;1;1	1;1;1	1;1;1	0	47576000	0	Nuclear cap-binding protein subunit 2	NCBP2	;;	3	1	1	1	1	1	1	1	1	1	1	1	1	20.4	20.4	20.4	6.199	54	54;103;156	1	11	0	5.4043	20.4	20.4	20.4	368330000	38084000	53455000	0	1	1	1	6
F8WF27;F8WBG6;P30408	F8WF27;F8WBG6;P30408	1;1;1	1;1;1	1;1;1	203510000	0	131490000	Transmembrane 4 L6 family member 1	TM4SF1	;;	3	1	1	1	1	1	1	1	1	1	1	1	1	8.9	8.9	8.9	10.989	101	101;103;202	1	20	0.0031416	2.2895	8.9	8.9	8.9	1169400000	196080000	56116000	119330000	1	0	1	5
F8WF49;Q9Y2H0-3;Q9Y2H0-1;Q9Y2H0	F8WF49;Q9Y2H0-3;Q9Y2H0-1;Q9Y2H0	3;3;3;3	3;3;3;3	3;3;3;3	0	0	15025000	Disks large-associated protein 4	DLGAP4	;;;	4	3	3	3	2	1	2	2	1	2	2	1	2	16.4	16.4	16.4	26.941	244	244;453;989;992	1	21	0	6.2263	10.2	4.5	10.7	347040000	22054000	23458000	13363000	2	0	0	5
F8WJN3;Q16630-3;Q16630;Q16630-2;F8W084	F8WJN3;Q16630-3;Q16630;Q16630-2	14;14;14;14;2	14;14;14;14;2	14;14;14;14;2	550910000	521990000	452570000	Cleavage and polyadenylation specificity factor subunit 6	CPSF6	;;;	5	14	14	14	12	8	7	12	8	7	12	8	7	35.4	35.4	35.4	52.269	478	478;478;551;588;107	1	129	0	188.9	30.5	16.7	18	5724000000	788080000	461780000	323150000	9	4	3	63
G3V0G5;Q8IV38;F8WB95	G3V0G5;Q8IV38	3;3;1	3;3;1	3;3;1	0	49687000	0	Ankyrin repeat and MYND domain-containing protein 2	ANKMY2	;	3	3	3	3	3	3	2	3	3	2	3	3	2	11.7	11.7	11.7	38.072	341	341;441;69	1	25	0	6.1132	11.7	11.7	7.9	319500000	43138000	64783000	32006000	0	1	1	7
G3V0I5;P49821-2;P49821;E9PQP1;B4DE93;E9PMX3;E9PJL9;E9PLC6;E9PPR0;E9PPS5;E9PPD6;H0YD04;H0YE81	G3V0I5;P49821-2;P49821;E9PQP1;B4DE93;E9PMX3	7;7;7;5;5;4;3;3;3;2;1;1;1	7;7;7;5;5;4;3;3;3;2;1;1;1	7;7;7;5;5;4;3;3;3;2;1;1;1	68560000	0	72093000	NADH dehydrogenase [ubiquinone] flavoprotein 1, mitochondrial	NDUFV1	;;;;;	13	7	7	7	4	2	5	4	2	5	4	2	5	20.4	20.4	20.4	50.054	457	457;455;464;178;363;178;95;136;144;75;52;127;133	1	55	0	14.941	9	5.5	11.2	778820000	57238000	28473000	61145000	1	0	1	18
G3V126;Q9UI12-2;Q9UI12;E5RG49;E5RHH0	G3V126;Q9UI12-2;Q9UI12	8;8;8;2;2	8;8;8;2;2	8;8;8;2;2	101460000	115300000	154210000	V-type proton ATPase subunit H	ATP6V1H	;;	5	8	8	8	7	4	5	7	4	5	7	4	5	28.2	28.2	28.2	51.57	443	443;465;483;101;102	1	66	0	40.63	24.8	12.9	14.2	1449200000	145810000	79432000	61995000	3	2	4	37
G3V1D3;G3V180;Q9NY33-4;Q9NY33;E9PQ14;Q9NY33-2;E9PKK8;E9PPK9;E9PNX5;E9PQF2	G3V1D3;G3V180;Q9NY33-4;Q9NY33	23;23;23;23;9;7;6;6;4;2	23;23;23;23;9;7;6;6;4;2	23;23;23;23;9;7;6;6;4;2	830640000	765070000	694560000	Dipeptidyl peptidase 3	DPP3	;;;	10	23	23	23	21	22	16	21	22	16	21	22	16	42.3	42.3	42.3	84.304	756	756;757;707;737;177;317;170;201;104;90	1	265	0	112.47	40.2	40.3	30.4	9560600000	873860000	977030000	614220000	17	18	10	154
G3V1K3;J3QT77;Q15165-3;Q15165-1;Q15165;G3XAK4	G3V1K3;J3QT77;Q15165-3;Q15165-1;Q15165;G3XAK4	12;11;11;11;11;7	12;11;11;11;11;7	12;11;11;11;11;7	787430000	732940000	832360000	Serum paraoxonase/arylesterase 2	PON2	;;;;;	6	12	12	12	11	10	10	11	10	10	11	10	10	48.3	48.3	48.3	41.527	375	375;342;342;354;354;219	1	194	0	124.46	48.3	42.4	42.4	9335700000	826300000	898810000	731470000	13	12	11	140
G3V1N2;P69905	G3V1N2;P69905	5;5	1;1	1;1	0	0	306000000	Hemoglobin subunit alpha	HBA2;HBA1	;	2	5	1	1	5	5	5	1	1	1	1	1	1	41.8	10.9	10.9	11.948	110	110;142	1	17	0.00051073	2.9119	41.8	41.8	41.8	2076100000	130900000	111340000	287520000	1	2	1	15
G3V1Q4;Q5JXL7;Q6ZU15	G3V1Q4	19;4;1	1;0;0	0;0;0	0	0	40094000		7\Sep		3	19	1	0	17	15	13	1	1	1	0	0	0	54.2	2.3	0	44.842	384	384;88;432	1	12	0.0097528	1.6478	52.9	46.9	36.7	618510000	55230000	56342000	35660000	1	0	0	3
G3V2F7;Q13404-1;Q13404;Q13404-7;Q13404-2;Q13404-8;Q13404-6	G3V2F7;Q13404-1;Q13404;Q13404-7;Q13404-2;Q13404-8;Q13404-6	10;9;8;8;8;6;5	10;9;8;8;8;6;5	3;3;3;3;3;1;3	1129300000	1036800000	1077700000	Ubiquitin-conjugating enzyme E2 variant 1	UBE2V1	;;;;;;	7	10	10	3	8	7	8	8	7	8	3	2	2	31.9	31.9	10	42.208	370	370;221;147;170;170;105;103	1	131	0	27.538	26.8	22.4	25.4	12163000000	1154600000	1200300000	937980000	5	4	6	61
G3V2V6;H0YJH8;G3V2S6;Q9Y5K8	G3V2V6;H0YJH8;G3V2S6;Q9Y5K8	1;1;1;1	1;1;1;1	1;1;1;1	0	0	21202000	V-type proton ATPase subunit D	ATP6V1D	;;;	4	1	1	1	1	1	1	1	1	1	1	1	1	7.4	7.4	7.4	17.422	148	148;153;192;247	1	13	0.0017539	2.6811	7.4	7.4	7.4	218680000	23488000	18754000	18857000	1	1	1	11
G3V325;C9JJT5;F5H4H2;C9JU26;P56134-4;P56134-2;O75127	G3V325;C9JJT5;F5H4H2;C9JU26;P56134-4;P56134-2	3;2;2;2;2;2;1	1;0;0;0;0;0;1	1;0;0;0;0;0;1	0	6006200	0	ATP synthase subunit f, mitochondrial	ATP5J2-PTCD1;ATP5J2	;;;;;	7	3	1	1	3	3	2	1	1	0	1	1	0	4.9	1.7	1.7	84.109	749	749;54;88;98;49;88;700	1	7	0.0058562	1.9709	4.9	4.9	3.2	46922000	6583900	6748400	0	0	0	0	2
G3V4F2;Q86TX2;P49753;B3KSA0;P49753-2	G3V4F2;Q86TX2;P49753;B3KSA0;P49753-2	8;8;7;4;4	8;8;7;4;4	8;8;7;4;4	385920000	369040000	269110000	Acyl-coenzyme A thioesterase 1;Acyl-coenzyme A thioesterase 2, mitochondrial	ACOT1;ACOT2	;;;;	5	8	8	8	4	4	5	4	4	5	4	4	5	28.9	28.9	28.9	43.733	395	395;421;483;286;301	1	53	0	23.447	11.9	11.9	16.2	3660900000	394780000	373660000	363140000	1	1	2	16
G3V4W0;B4DY08;G3V4C1;P07910-2;P07910-4;G3V2D6;P07910-3;G3V5X6;G3V3K6;G3V251;G3V5V7;B4DSU6;G3V4M8;O60812;G3V2H6;E5RG71;B3KT61;Q86SE5;Q86SE5-3	G3V4W0;B4DY08;G3V4C1;P07910-2;P07910-4;G3V2D6;P07910-3;G3V5X6;G3V3K6;G3V251;G3V5V7	12;12;12;12;11;7;7;6;6;6;6;5;4;4;3;1;1;1;1	12;12;12;12;11;7;7;6;6;6;6;5;4;4;3;1;1;1;1	1;1;1;1;1;1;0;1;1;1;0;0;0;0;0;0;0;0;0	693450000	825130000	791050000	Heterogeneous nuclear ribonucleoproteins C1/C2	HNRNPC	;;;;;;;;;;	19	12	12	1	11	12	12	11	12	12	1	1	1	48.5	48.5	6.9	28.916	262	262;288;292;293;250;214;226;117;121;126;180;147;66;293;54;85;280;291;304	1	192	0	55.563	45.8	48.5	48.5	10251000000	703380000	1003100000	776000000	6	11	8	111
G3V529;Q9GZR7-2;Q9GZR7;F5GYL3	G3V529;Q9GZR7-2;Q9GZR7;F5GYL3	7;7;7;5	7;7;7;5	7;7;7;5	72025000	85539000	70088000	ATP-dependent RNA helicase DDX24	DDX24	;;;	4	7	7	7	5	6	3	5	6	3	5	6	3	10.7	10.7	10.7	91.48	816	816;804;859;609	1	64	0	10.955	7.1	8.9	4.2	908250000	85225000	117140000	35987000	2	1	2	17
G3V572;G3V3R9;G3V3Y4;G3V256;Q6PJT7-4;Q6PJT7-3;Q6PJT7-5;Q6PJT7-9;Q6PJT7-2;Q6PJT7;Q6PJT7-11;G3V473;G3V240;Q6PJT7-10;H0YJA2;G3V2X4	G3V572;G3V3R9;G3V3Y4;G3V256;Q6PJT7-4;Q6PJT7-3;Q6PJT7-5;Q6PJT7-9;Q6PJT7-2;Q6PJT7;Q6PJT7-11;G3V473;G3V240;Q6PJT7-10	5;5;5;5;5;5;5;5;5;5;4;3;3;3;2;1	5;5;5;5;5;5;5;5;5;5;4;3;3;3;2;1	5;5;5;5;5;5;5;5;5;5;4;3;3;3;2;1	36240000	0	87848000	Zinc finger CCCH domain-containing protein 14	ZC3H14	;;;;;;;;;;;;;	16	5	5	5	2	2	4	2	2	4	2	2	4	47.7	47.7	47.7	14.68	132	132;209;215;605;571;579;711;730;735;736;585;72;94;543;651;64	1	32	0	6.412	15.2	15.2	33.3	286180000	19699000	12934000	37284000	2	2	2	9
G3V599;O15320-9;O15320-8;O15320-6;O15320-7;O15320-2;O15320-4;O15320-3;O15320-10;O15320;O15320-5	G3V599;O15320-9;O15320-8;O15320-6;O15320-7;O15320-2;O15320-4;O15320-3;O15320-10;O15320;O15320-5	3;3;3;3;3;3;3;3;3;3;3	3;3;3;3;3;3;3;3;3;3;3	3;3;3;3;3;3;3;3;3;3;3	0	43061000	40048000	cTAGE family member 5	CTAGE5	;;;;;;;;;;	11	3	3	3	1	2	2	1	2	2	1	2	2	4.2	4.2	4.2	151.72	1339	1339;672;724;729;732;761;771;775;792;804;809	1	28	0	4.3604	1	2.7	2.7	483330000	15594000	33311000	22873000	0	0	0	8
G3V5T9;P24941-2;P24941;E7ESI2;Q00526;K7EJ83	G3V5T9;P24941-2;P24941;E7ESI2	12;12;12;10;3;2	10;10;10;8;1;1	10;10;10;8;1;1	287930000	284020000	296390000	Cyclin-dependent kinase 2	CDK2	;;;	6	12	10	10	11	10	12	9	8	10	9	8	10	45.7	40.2	40.2	39.178	346	346;264;298;238;305;213	1	112	0	62.867	38.4	34.7	45.7	3135700000	275110000	272940000	310470000	4	3	7	51
G3V5V3;O60524-4;O60524-5;O60524-3;O60524;G3V547;G3V4D9;O60524-2	G3V5V3;O60524-4;O60524-5;O60524-3;O60524	7;7;7;7;7;2;2;1	7;7;7;7;7;2;2;1	7;7;7;7;7;2;2;1	49641000	52367000	50949000	Nuclear export mediator factor NEMF	NEMF	;;;;	8	7	7	7	5	5	3	5	5	3	5	5	3	8.1	8.1	8.1	113.95	998	998;1034;1051;1055;1076;121;178;276	1	56	0	6.6226	6.1	6.1	3.6	584790000	58953000	65372000	33080000	0	1	0	17
G3V5Z7;P60900;G3V295;P60900-2;G3V3I1;G3V3U4;P60900-3;H0YJC4;G3V4S5;G3V2S7	G3V5Z7;P60900;G3V295;P60900-2;G3V3I1	15;15;13;12;11;7;7;3;2;2	15;15;13;12;11;7;7;3;2;2	15;15;13;12;11;7;7;3;2;2	2703600000	2610200000	2477000000	Proteasome subunit alpha type;Proteasome subunit alpha type-6	PSMA6	;;;;	10	15	15	15	15	15	13	15	15	13	15	15	13	60.7	60.7	60.7	28.147	252	252;246;203;227;148;107;167;85;41;67	1	247	0	246.71	60.7	60.7	55.6	33293000000	2936600000	3127500000	1915800000	17	18	14	180
G3XAH6;P51003;P51003-2;G3V3I9;G3V457;G3V2A0;H7C3W0;H0YJL4;H0YJ00;F8WAT4;Q9NRJ5;Q9BWT3-2;Q9BWT3	G3XAH6;P51003;P51003-2	7;7;4;3;2;2;1;1;1;1;1;1;1	7;7;4;3;2;2;1;1;1;1;1;1;1	7;7;4;3;2;2;1;1;1;1;1;1;1	0	0	39042000	Poly(A) polymerase alpha	PAPOLA	;;	13	7	7	7	1	1	3	1	1	3	1	1	3	14.6	14.6	14.6	80.625	724	724;745;285;177;111;475;168;181;203;234;636;714;736	1	24	0	12.689	1.9	1.4	6.8	222130000	6366800	1270600	35081000	0	0	1	7
G3XAI2;P07942;E7EPA6	G3XAI2;P07942;E7EPA6	12;12;6	12;12;6	12;12;6	134140000	150770000	151500000	Laminin subunit beta-1	LAMB1	;;	3	12	12	12	8	9	7	8	9	7	8	9	7	9.3	9.3	9.3	200.48	1810	1810;1786;850	1	111	0	45.082	7	6.7	6.2	1912200000	143260000	193660000	119490000	6	6	4	57
G3XAN4;B4E0K2;Q15629	G3XAN4;B4E0K2;Q15629	6;6;6	6;6;6	6;6;6	196320000	123930000	179820000	Translocating chain-associated membrane protein 1	TRAM1	;;	3	6	6	6	5	4	4	5	4	4	5	4	4	25	25	25	33.435	288	288;343;374	1	65	0	33.017	18.1	15.3	15.3	2145700000	242620000	104320000	149020000	0	3	2	32
G5E994;Q5VW38-2;Q5VW38;U3KQD2;Q5VW38-3	G5E994;Q5VW38-2;Q5VW38;U3KQD2;Q5VW38-3	2;2;2;1;1	2;2;2;1;1	2;2;2;1;1	0	0	30581000	Protein GPR107	GPR107	;;;;	5	2	2	2	1	1	2	1	1	2	1	1	2	3.7	3.7	3.7	63.984	571	571;552;600;128;300	1	18	0	4.7493	1.8	1.8	3.7	221360000	8462500	8688600	21807000	0	0	1	9
G5E9E7;G3V1L9;Q07157-2;Q07157;H0YKB1;H0Y3R8;H0YLT6	G5E9E7;G3V1L9;Q07157-2;Q07157	14;14;14;14;4;1;1	14;14;14;14;4;1;1	14;14;14;14;4;1;1	127380000	126660000	135420000	Tight junction protein ZO-1	TJP1	;;;	7	14	14	14	11	12	10	11	12	10	11	12	10	9.9	9.9	9.9	189.67	1692	1692;1768;1668;1748;383;227;231	1	130	0	17.466	7.9	8.6	6.9	1624900000	174990000	154900000	105580000	5	4	3	45
G5E9I3;F5H7K1;E7EWW0;Q7Z3J2;C9J7I2;Q7Z3J2-2;H3BV68;H3BVG8;H3BUS7;H3BTI5;H3BNX2;F6S1J4	G5E9I3;F5H7K1;E7EWW0;Q7Z3J2;C9J7I2;Q7Z3J2-2;H3BV68	12;12;12;12;10;10;9;5;2;1;1;1	12;12;12;12;10;10;9;5;2;1;1;1	12;12;12;12;10;10;9;5;2;1;1;1	131610000	122350000	145630000	UPF0505 protein C16orf62	C16orf62	;;;;;;	12	12	12	12	8	9	7	8	9	7	8	9	7	18.7	18.7	18.7	98.889	870	870;959;1052;963;813;813;712;453;116;73;170;273	1	102	0	30.074	14.1	14.8	12	1474900000	136830000	116120000	106370000	5	5	2	37
G5E9S8;G3V2E7;F8W6L3;G3V3H3;G3V5R9;E7EVH7;Q07866-8;Q07866-2;Q07866-3;Q07866;Q07866-7;Q07866-5;Q07866-10;Q07866-6;Q07866-4;Q07866-9;G3V2P7;H0YJU9;H0YJL0;H0YJT3;H0YG16;H0YGB8	G5E9S8;G3V2E7;F8W6L3;G3V3H3;G3V5R9;E7EVH7;Q07866-8;Q07866-2;Q07866-3;Q07866;Q07866-7;Q07866-5;Q07866-10;Q07866-6;Q07866-4;Q07866-9	17;17;17;17;17;17;17;17;17;17;17;17;17;17;17;17;7;3;3;3;3;1	17;17;17;17;17;17;17;17;17;17;17;17;17;17;17;17;7;3;3;3;3;1	13;13;13;13;13;13;13;13;13;13;13;13;13;13;13;13;6;3;3;3;3;1	398670000	366430000	348310000	Kinesin light chain 1	KLC1	;;;;;;;;;;;;;;;	22	17	17	13	12	11	11	12	11	11	9	8	9	35	35	25.7	62.506	549	549;551;576;609;630;732;551;560;564;573;584;616;618;628;637;639;150;131;150;161;268;60	1	164	0	41.816	26	23.5	23.3	4105700000	421190000	432130000	254480000	7	6	8	73
G5E9W2;Q9P2E5;Q9P2E5-2;C9JZF7	G5E9W2;Q9P2E5;Q9P2E5-2	7;7;4;1	7;7;4;1	7;7;4;1	30800000	33396000	31566000	Chondroitin sulfate glucuronyltransferase	CHPF2	;;	4	7	7	7	5	6	3	5	6	3	5	6	3	11	11	11	85.146	764	764;772;666;90	1	49	0	7.4021	7.5	8.6	4.3	452770000	42600000	45976000	23748000	1	2	2	21
G5E9W7;G5E9V5;P82650;H7C5F2;H7C5H3;Q9H3I1;C9J5D8	G5E9W7;G5E9V5;P82650;H7C5F2;H7C5H3;Q9H3I1	8;8;8;4;4;4;1	8;8;8;4;4;4;1	8;8;8;4;4;4;1	82788000	89618000	89152000	28S ribosomal protein S22, mitochondrial	MRPS22	;;;;;	7	8	8	8	4	5	6	4	5	6	4	5	6	38.6	38.6	38.6	36.805	319	319;359;360;165;200;168;51	1	56	0	21.448	22.3	24.8	29.8	981910000	84136000	72526000	127900000	2	2	0	21
G5E9Z2	G5E9Z2	12	1	1	0	0	61792000		CLPTM1L		1	12	1	1	10	12	9	1	1	1	1	1	1	43.4	6.5	6.5	43.28	369	369	1	12	0	17.033	34.1	43.4	36.9	772790000	40921000	80790000	54959000	1	1	1	12
G5EA30;Q92879-5;Q92879-2;Q92879-3;Q92879-6;Q92879;Q92879-4;E9PSH0;E9PQK4;E9PKU1;E9PKA1;F5H4Y5;F5H0D8;B4DIB6;V9GYD9;Q5VZZ6;E9PC62;O95319-5;O95319-2;O95319;O95319-4;O95319-3	G5EA30;Q92879-5;Q92879-2;Q92879-3;Q92879-6;Q92879;Q92879-4	12;12;12;12;12;12;12;5;4;4;2;2;2;1;1;1;1;1;1;1;1;1	12;12;12;12;12;12;12;5;4;4;2;2;2;1;1;1;1;1;1;1;1;1	12;12;12;12;12;12;12;5;4;4;2;2;2;1;1;1;1;1;1;1;1;1	478350000	439640000	410630000	CUGBP Elav-like family member 1	CELF1	;;;;;;	22	12	12	12	12	9	9	12	9	9	12	9	9	23.3	23.3	23.3	55.142	514	514;468;482;483;485;486;512;95;87;114;56;78;103;403;440;502;521;488;490;508;509;521	1	169	0	44.168	23.3	17.5	18.9	5459700000	623890000	410200000	352830000	13	3	7	70
G5EA36;P30260;P30260-2;B4DL80;I3L394;I3L2Z8;I3L328;I3L3H6;F6QPS0	G5EA36;P30260;P30260-2;B4DL80;I3L394	6;6;6;5;3;1;1;1;1	6;6;6;5;3;1;1;1;1	6;6;6;5;3;1;1;1;1	37494000	39452000	39347000	Cell division cycle protein 27 homolog	CDC27	;;;;	9	6	6	6	5	4	4	5	4	4	5	4	4	7.2	7.2	7.2	91.737	823	823;824;830;763;163;86;113;233;343	1	55	0	5.7074	6	4.9	4.9	425290000	52392000	37623000	21360000	1	3	2	18
G5EA48;Q7Z6B7-2;Q7Z6B7	G5EA48;Q7Z6B7-2;Q7Z6B7	3;3;3	2;2;2	2;2;2	0	0	25642000	SLIT-ROBO Rho GTPase-activating protein 1	SRGAP1	;;	3	3	2	2	2	2	3	1	1	2	1	1	2	4.1	2.9	2.9	116.84	1022	1022;1062;1085	1	15	0	9.7786	2.7	2.7	4.1	114800000	10979000	2466000	22794000	0	0	2	8
G5EA52;P30101	G5EA52;P30101	38;38	37;37	31;31	16185000000	16180000000	16888000000	Protein disulfide-isomerase A3	PDIA3	;	2	38	37	31	37	35	34	36	35	34	30	30	28	72.8	72.8	61.9	54.963	485	485;505	1	720	0	323.31	72.8	72.8	69.5	198340000000	18244000000	19543000000	15447000000	48	60	51	569
G8JLB6;P31943;E9PCY7;D6RBM0;D6RIT2;D6RIU0;D6RAM1;D6R9T0;D6RFM3;E7EN40;D6RDU3;D6RJ04;D6RIH9;H0YB39;E7EQJ0;E5RGV0;H0YBD7;D6RDL0;H0YBG7;D6RF17;E5RGH4;H0YAQ2;F5GZT4;D6R9D3;E5RJ94	G8JLB6;P31943;E9PCY7;D6RBM0;D6RIT2;D6RIU0;D6RAM1;D6R9T0;D6RFM3;E7EN40;D6RDU3;D6RJ04;D6RIH9;H0YB39	20;20;19;13;11;11;10;10;10;10;10;10;10;10;9;9;8;7;5;4;4;4;4;3;2	20;20;19;13;11;11;10;10;10;10;10;10;10;10;9;9;8;7;5;4;4;4;4;3;2	11;11;10;7;8;7;7;7;7;6;7;7;7;4;7;4;3;6;2;4;1;1;2;3;2	4087800000	4782600000	5043300000	Heterogeneous nuclear ribonucleoprotein H;Heterogeneous nuclear ribonucleoprotein H, N-terminally processed	HNRNPH1	;;;;;;;;;;;;;	25	20	20	11	18	19	18	18	19	18	10	11	9	52.8	52.8	32.2	51.229	472	472;449;429;212;164;168;130;161;163;166;171;172;184;277;115;155;194;84;185;49;100;131;159;40;28	1	441	0	323.31	52.1	52.8	46.6	57690000000	3964000000	5363600000	4288300000	23	28	23	333
H0Y329;G8JLI5;Q9Y484;Q9Y484-3;Q9Y484-2;H7C5B4;C9J5L0;C9JE01;C9JUS5;C9JBX7;C9J471;C9JYH8	H0Y329;G8JLI5;Q9Y484;Q9Y484-3;Q9Y484-2;H7C5B4;C9J5L0;C9JE01;C9JUS5;C9JBX7;C9J471;C9JYH8	2;2;2;2;2;1;1;1;1;1;1;1	2;2;2;2;2;1;1;1;1;1;1;1	2;2;2;2;2;1;1;1;1;1;1;1	0	0	16833000	WD repeat domain phosphoinositide-interacting protein 4	WDR45	;;;;;;;;;;;	12	2	2	2	1	1	2	1	1	2	1	1	2	8.7	8.7	8.7	31.781	287	287;346;360;361;371;81;142;158;190;213;256;325	1	17	0	4.1264	3.8	4.9	8.7	84924000	0	9276600	14972000	1	0	0	9
H0Y4G9;Q99836-5;Q99836;Q99836-6;Q99836-2;Q99836-3;Q99836-4	H0Y4G9;Q99836-5;Q99836;Q99836-6;Q99836-2	8;8;8;8;6;3;2	8;8;8;8;6;3;2	8;8;8;8;6;3;2	105230000	98439000	101760000	Myeloid differentiation primary response protein MyD88	MYD88	;;;;	7	8	8	8	8	7	5	8	7	5	8	7	5	32.3	32.3	32.3	35.312	316	316;275;296;304;251;191;146	1	81	0	16.244	32.3	28.2	23.1	1193700000	124890000	125760000	85761000	4	0	3	31
H0Y517;H7C1U3;Q5T0F9-3;Q5T0F9-2;Q5T0F9;Q5T0F9-4	H0Y517;H7C1U3;Q5T0F9-3;Q5T0F9-2;Q5T0F9;Q5T0F9-4	5;5;5;5;5;3	5;5;5;5;5;3	5;5;5;5;5;3	53831000	45849000	0	Coiled-coil and C2 domain-containing protein 1B	CC2D1B	;;;;;	6	5	5	5	3	3	1	3	3	1	3	3	1	10.2	10.2	10.2	69.548	628	628;672;532;852;858;214	1	22	0	7.7474	5.7	5.7	2.5	394900000	53433000	42727000	21160000	1	1	0	10
H0Y5H9;P48594;F8W9L1;C9JZ65	H0Y5H9;P48594;F8W9L1	10;10;9;3	3;3;3;1	3;3;3;1	0	0	20527000	Serpin B4	SERPINB4;SERPINB3	;;	4	10	3	3	8	6	8	2	2	2	2	2	2	31.8	11.3	11.3	42.388	371	371;390;338;211	1	20	0	31.478	24.5	20.8	25.1	222340000	34475000	11224000	17422000	2	1	0	9
H0Y612;Q9UPN9-2;Q9UPN9;E7EN20	H0Y612;Q9UPN9-2;Q9UPN9	6;6;6;2	6;6;6;2	6;6;6;2	0	52302000	0	E3 ubiquitin-protein ligase TRIM33	TRIM33	;;	4	6	6	6	1	3	3	1	3	3	1	3	3	7.5	7.5	7.5	98.891	888	888;1110;1127;759	1	42	0	24.059	1.5	3.5	4.7	606590000	12881000	44581000	49673000	0	0	1	16
H0Y621;H7BXI5;H0Y5K5;E9PFA8;Q9Y282-2;Q9Y282;Q9Y282-3;A6PVJ2	H0Y621;H7BXI5;H0Y5K5;E9PFA8;Q9Y282-2;Q9Y282;Q9Y282-3	4;4;4;4;4;4;4;1	4;4;4;4;4;4;4;1	4;4;4;4;4;4;4;1	128030000	111500000	92725000	Endoplasmic reticulum-Golgi intermediate compartment protein 3	ERGIC3	;;;;;;	8	4	4	4	3	3	4	3	3	4	3	3	4	16	16	16	36.851	326	326;388;397;398;230;383;388;118	1	33	0	9.8414	11.3	11.3	16	1249600000	141210000	131230000	137510000	1	1	2	13
H0Y626;O95361;B3KP96;K7ENN8;J3KPT5;O95361-2;J3QKY5;K7EL43;I3L1X9;I3L3K9;I3L2F3;Q309B1;J3QL38	H0Y626;O95361;B3KP96;K7ENN8;J3KPT5;O95361-2	7;7;6;4;4;4;3;3;2;2;2;2;1	7;7;6;4;4;4;3;3;2;2;2;2;1	7;7;6;4;4;4;3;3;2;2;2;2;1	203400000	180410000	161000000	Tripartite motif-containing protein 16	TRIM16	;;;;;	13	7	7	7	7	5	5	7	5	5	7	5	5	9.4	9.4	9.4	107.97	953	953;564;434;232;402;348;115;184;115;224;232;348;96	1	84	0	37.776	9.4	6.1	7.8	2093900000	245120000	202530000	138710000	4	3	2	31
H0Y6A0	H0Y6A0	3	1	1	0	0	12444000		ARFGAP3		1	3	1	1	1	2	2	1	1	1	1	1	1	19	5.5	5.5	29.956	273	273	1	12	0	6.0244	5.5	9.2	15.4	166520000	14636000	12605000	11068000	1	0	1	8
H0Y6C3;Q53H96;B5MD87;F8WEI0	H0Y6C3;Q53H96;B5MD87	5;5;3;1	5;5;3;1	5;5;3;1	72271000	93391000	73640000	Pyrroline-5-carboxylate reductase 3	PYCRL	;;	4	5	5	5	3	5	3	3	5	3	3	5	3	27.6	27.6	27.6	27.138	261	261;274;137;44	1	50	0	21.457	18.4	27.6	18.4	1033100000	61404000	136320000	76532000	2	4	2	31
H0Y6I0;Q13439-3;Q13439-4;Q13439;Q13439-5;E7EVX2	H0Y6I0;Q13439-3;Q13439-4;Q13439;Q13439-5	4;4;4;4;4;1	4;4;4;4;4;1	4;4;4;4;4;1	24341000	30875000	26855000	Golgin subfamily A member 4	GOLGA4	;;;;	6	4	4	4	3	3	2	3	3	2	3	3	2	2.5	2.5	2.5	246.6	2099	2099;2223;2228;2230;2243;445	1	30	0	14.702	2	2	1.6	321190000	31920000	30335000	19302000	2	1	0	13
H0Y6Y8;B1AL05;Q8N983-4;Q8N983-3;Q8N983-2;Q8N983;Q8N983-6;Q8N983-7;M0R051;H0YBU8	H0Y6Y8;B1AL05;Q8N983-4;Q8N983-3;Q8N983-2;Q8N983;Q8N983-6;Q8N983-7;M0R051;H0YBU8	2;2;2;2;2;2;2;2;1;1	2;2;2;2;2;2;2;2;1;1	2;2;2;2;2;2;2;2;1;1	22206000	0	0	39S ribosomal protein L43, mitochondrial	MRPL43	;;;;;;;;;	10	2	2	2	1	0	1	1	0	1	1	0	1	10.7	10.7	10.7	18.657	169	169;184;159;164;202;215;235;261;44;148	1	5	0.00026008	3.1905	4.1	0	6.5	73137000	23132000	0	0	1	0	1	4
H0Y7A7;P62158;E7ETZ0;E7EMB3;M0QZ52;Q96HY3;F8WBR5;G3V479;G3V361;G3V226;P27482;C9J7T9;P02585	H0Y7A7;P62158;E7ETZ0;E7EMB3;M0QZ52;Q96HY3	11;11;10;10;6;6;5;5;5;3;2;1;1	11;11;10;10;6;6;5;5;5;3;2;1;1	11;11;10;10;6;6;5;5;5;3;2;1;1	6293700000	7071700000	7330200000	Calmodulin	CALM2;CALM1;CALM3	;;;;;	13	11	11	11	11	10	10	11	10	10	11	10	10	48.1	48.1	48.1	20.762	187	187;149;150;196;83;113;65;83;98;76;149;145;160	1	246	0	323.31	48.1	48.1	48.1	81621000000	6716700000	7807100000	6571400000	13	13	12	162
H0Y7H8;G3XAA0;Q8NFD5-4;Q8NFD5;Q8NFD5-2;Q8NFD5-3	H0Y7H8;G3XAA0;Q8NFD5-4;Q8NFD5;Q8NFD5-2;Q8NFD5-3	1;1;1;1;1;1	1;1;1;1;1;1	1;1;1;1;1;1	0	4713600	0	AT-rich interactive domain-containing protein 1B	ARID1B	;;;;;	6	1	1	1	1	1	0	1	1	0	1	1	0	0.7	0.7	0.7	190.69	1758	1758;2231;1486;2236;2249;2289	1	5	0.00025661	2.9667	0.7	0.7	0	19009000	3737100	5296100	0	0	0	0	1
H0Y818;P40692;P40692-2;P40692-3;H0Y806;B7Z821	H0Y818;P40692;P40692-2;P40692-3	4;4;2;2;1;1	4;4;2;2;1;1	4;4;2;2;1;1	28701000	0	0	DNA mismatch repair protein Mlh1	MLH1	;;;	6	4	4	4	3	1	1	3	1	1	3	1	1	10.6	10.6	10.6	75.747	679	679;756;515;658;114;460	1	24	0	23.481	8	3.4	3.4	267920000	26791000	18618000	14123000	2	1	1	17
H0Y842;E9PGX5;P30511;P30511-3;P30511-2	H0Y842;E9PGX5;P30511;P30511-3;P30511-2	5;5;5;5;3	1;1;1;1;1	1;1;1;1;1	0	0	6207200	HLA class I histocompatibility antigen, alpha chain F	HLA-F	;;;;	5	5	1	1	3	3	4	0	0	1	0	0	1	22.2	5.3	5.3	25.092	225	225;259;346;442;254	1	6	0.0017518	2.6622	9.3	14.7	20	31085000	0	0	5520800	0	0	0	2
H0Y8C3;Q9NZJ7-2;Q9NZJ7;Q5TDC2;B4E0C5;Q9NZJ7-3	H0Y8C3;Q9NZJ7-2;Q9NZJ7;Q5TDC2	7;7;7;5;3;2	7;7;7;5;3;2	7;7;7;5;3;2	232740000	185880000	192970000	Mitochondrial carrier homolog 1	MTCH1	;;;	6	7	7	7	6	5	5	6	5	5	6	5	5	21.3	21.3	21.3	43.121	394	394;372;389;357;254;171	1	110	0	16.103	18.5	16.5	16.2	2683700000	205350000	157490000	183980000	5	4	3	48
H0Y8L3;G8JLA8;Q15582;H0YAB8;H0Y9D7;S4R3C6	H0Y8L3;G8JLA8;Q15582	3;3;3;1;1;1	3;3;3;1;1;1	3;3;3;1;1;1	23297000	25438000	0	Transforming growth factor-beta-induced protein ig-h3	TGFBI	;;	6	3	3	3	2	2	1	2	2	1	2	2	1	12.3	12.3	12.3	39.793	366	366;683;683;59;194;219	1	24	0	5.8716	7.4	7.4	4.1	214280000	21064000	27097000	11843000	0	2	1	12
H0Y8P4;Q8TED0-2;Q8TED0-3;Q8TED0	H0Y8P4;Q8TED0-2;Q8TED0-3;Q8TED0	1;1;1;1	1;1;1;1	1;1;1;1	0	0	4589400	U3 small nucleolar RNA-associated protein 15 homolog	UTP15	;;;	4	1	1	1	1	1	1	1	1	1	1	1	1	1.8	1.8	1.8	61.32	545	545;328;499;518	1	12	0.0091659	1.7455	1.8	1.8	1.8	68350000	6385200	5770100	4081900	0	1	0	5
H0Y8X4;O43598;O43598-2	H0Y8X4;O43598;O43598-2	6;6;3	6;6;3	6;6;3	186910000	158850000	173560000	2-deoxynucleoside 5-phosphate N-hydrolase 1	DNPH1	;;	3	6	6	6	5	6	5	5	6	5	5	6	5	28	28	28	25.868	243	243;174;148	1	58	0	35.989	27.6	28	27.6	2037900000	190350000	173400000	247370000	2	4	3	27
H0Y990	H0Y990	3	1	1	0	0	27560000		ABCE1		1	3	1	1	2	2	2	1	1	1	1	1	1	21.1	9.5	9.5	16.236	147	147	1	11	0	4.0129	16.3	16.3	16.3	369910000	32243000	35876000	24512000	0	1	0	6
H0Y9G6;E7ETU7;P09001;D6RC14;E9PF06;D6RBQ5	H0Y9G6;E7ETU7;P09001;D6RC14;E9PF06	5;5;5;4;4;1	5;5;5;4;4;1	5;5;5;4;4;1	80602000	81097000	77357000	39S ribosomal protein L3, mitochondrial	MRPL3	;;;;	6	5	5	5	5	5	3	5	5	3	5	5	3	17.4	17.4	17.4	40.47	363	363;375;348;155;176;28	1	47	0	9.2565	17.4	17.4	7.2	882430000	105420000	105040000	42477000	3	3	1	21
H0Y9V7;P98194-2;P98194-4;P98194;P98194-3;P98194-5;P98194-9;P98194-6;P98194-7;E7ERC6;P98194-8;H0Y8X9;D6RGE9;D6REJ1;D6RHV9;H0Y9S7	H0Y9V7;P98194-2;P98194-4;P98194;P98194-3;P98194-5;P98194-9;P98194-6;P98194-7;E7ERC6;P98194-8	7;7;7;7;7;7;7;7;7;6;6;3;1;1;1;1	7;7;7;7;7;7;7;7;7;6;6;3;1;1;1;1	7;7;7;7;7;7;7;7;7;6;6;3;1;1;1;1	41486000	0	0	Calcium-transporting ATPase type 2C member 1	ATP2C1	;;;;;;;;;;	16	7	7	7	3	1	2	3	1	2	3	1	2	11.1	11.1	11.1	98.938	903	903;888;903;919;923;939;949;959;973;894;944;215;82;102;120;314	1	31	0	10.294	4.2	1.2	3	291240000	36545000	20295000	9971700	1	0	1	10
H0YA80;P63146;H0Y9V2	H0YA80;P63146;H0Y9V2	2;2;1	1;1;1	1;1;1	0	0	46689000	Ubiquitin-conjugating enzyme E2 B	UBE2B	;;	3	2	1	1	2	2	2	1	1	1	1	1	1	26.8	12.3	12.3	15.38	138	138;152;141	1	14	0.0029169	2.359	26.8	26.8	26.8	442620000	42418000	52725000	44067000	1	1	1	5
H0YAN8;O15013-7;O15013-4;O15013-5;O15013;O15013-6;E9PB39;B4DTE2;Q5VXI4;Q9HCE6-5;Q9HCE6-3;Q9HCE6-2;Q9HCE6	H0YAN8;O15013-7;O15013-4;O15013-5;O15013;O15013-6;E9PB39	4;4;4;4;4;3;2;1;1;1;1;1;1	4;4;4;4;4;3;2;1;1;1;1;1;1	4;4;4;4;4;3;2;1;1;1;1;1;1	20716000	17626000	0	Rho guanine nucleotide exchange factor 10	ARHGEF10	;;;;;;	13	4	4	4	3	4	2	3	4	2	3	4	2	4.1	4.1	4.1	109.65	988	988;1306;1340;1344;1369;1368;610;488;1052;1067;1235;1240;1279	1	32	0	3.8086	2.4	4.1	1.5	231650000	21405000	26258000	13870000	1	1	0	11
H0YAZ3;O60504-2;O60504;H0YB51;E5RHI2;H0YBA2	H0YAZ3;O60504-2;O60504;H0YB51;E5RHI2;H0YBA2	2;2;2;1;1;1	2;2;2;1;1;1	2;2;2;1;1;1	0	0	27889000	Vinexin	SORBS3	;;;;;	6	2	2	2	1	1	2	1	1	2	1	1	2	17.7	17.7	17.7	20.442	186	186;329;671;226;260;286	1	19	0.000762	2.8582	8.6	9.1	17.7	244940000	13653000	19450000	24635000	0	0	1	3
H0YAZ4	H0YAZ4	1	1	1	0	1478600000	0		CNGB3		1	1	1	1	0	1	0	0	1	0	0	1	0	10.8	10.8	10.8	12.342	111	111	1	6	0.0022222	2.5504	0	10.8	0	5157900000	0	1661400000	0	0	1	0	5
H0YB13;O76061;E5RG57	H0YB13;O76061	3;3;1	3;3;1	3;3;1	69695000	57833000	78532000	Stanniocalcin-2	STC2	;	3	3	3	3	3	3	3	3	3	3	3	3	3	23.6	23.6	23.6	13.775	123	123;302;53	1	35	0	4.3019	23.6	23.6	23.6	763230000	74940000	69957000	62616000	2	2	1	18
H0YB89;H0YC13;H0YB84;Q9UQ53-2;Q9UQ53;Q9UQ53-3	H0YB89;H0YC13;H0YB84;Q9UQ53-2;Q9UQ53;Q9UQ53-3	1;1;1;1;1;1	1;1;1;1;1;1	1;1;1;1;1;1	0	0	91006000	Alpha-1,3-mannosyl-glycoprotein 4-beta-N-acetylglucosaminyltransferase B	MGAT4B	;;;;;	6	1	1	1	1	1	1	1	1	1	1	1	1	7.5	7.5	7.5	27.715	240	240;322;373;547;548;563	1	15	0.0044907	2.0373	7.5	7.5	7.5	897580000	64010000	87079000	80942000	0	0	1	6
H0YBP1;E7ESA6;Q8IYN9;Q05397;Q05397-5;J3QT16;E9PEI4;Q8N9D7;H0YB16;H0YBZ1;Q05397-2;B4DWJ1;Q05397-6;E5RG86;E5RHD8;E5RGA6;Q05397-3	H0YBP1;E7ESA6;Q8IYN9;Q05397;Q05397-5;J3QT16;E9PEI4;Q8N9D7;H0YB16;H0YBZ1;Q05397-2;B4DWJ1;Q05397-6	4;4;4;4;4;4;3;3;3;3;3;2;2;1;1;1;1	4;4;4;4;4;4;3;3;3;3;3;2;2;1;1;1;1	4;4;4;4;4;4;3;3;3;3;3;2;2;1;1;1;1	0	20548000	0	Focal adhesion kinase 1	PTK2	;;;;;;;;;;;;	17	4	4	4	1	2	2	1	2	2	1	2	2	5.9	5.9	5.9	115.45	1017	1017;1096;1006;1052;1065;1065;680;720;724;753;879;362;360;59;115;156;554	1	16	0	9.6274	2.1	3	2.9	187760000	29188000	23087000	20601000	1	1	1	6
H0YD13;E7EPC6;P16070-18;P16070-12;P16070-14;P16070-13;P16070-11;P16070-10;P16070-16;P16070-8;P16070-17;P16070-6;P16070-4;P16070-3;P16070-7;P16070-5;P16070;H0Y2P0;H0YE40;H0YDW7;H0YCV9;H0Y5E4;P16070-15;P16070-9;E9PKC6;H0YDX6;J3KN83;Q86UZ1;H0YD17;P16070-19	H0YD13;E7EPC6;P16070-18;P16070-12;P16070-14;P16070-13;P16070-11;P16070-10;P16070-16;P16070-8;P16070-17;P16070-6;P16070-4;P16070-3;P16070-7;P16070-5;P16070;H0Y2P0;H0YE40	10;10;10;10;10;10;10;10;10;10;10;10;10;10;10;10;10;9;6;4;4;4;4;4;3;3;3;2;2;2	10;10;10;10;10;10;10;10;10;10;10;10;10;10;10;10;10;9;6;4;4;4;4;4;3;3;3;2;2;2	10;10;10;10;10;10;10;10;10;10;10;10;10;10;10;10;10;9;6;4;4;4;4;4;3;3;3;2;2;2	5663300000	5223400000	5078900000	CD44 antigen	CD44	;;;;;;;;;;;;;;;;;;	30	10	10	10	9	9	9	9	9	9	9	9	9	47.6	47.6	47.6	22.683	206	206;714;340;361;396;425;429;493;668;674;691;699;699;711;713;734;742;287;82;240;249;294;294;675;78;181;232;80;229;139	1	215	0	62.169	42.7	43.7	43.7	60373000000	5667800000	5646100000	4594500000	9	13	8	136
H0YDJ3;F5H2U2;Q13523	H0YDJ3;F5H2U2;Q13523	4;4;4	4;4;4	4;4;4	27358000	36086000	0	Serine/threonine-protein kinase PRP4 homolog	PRPF4B	;;	3	4	4	4	3	4	1	3	4	1	3	4	1	9	9	9	68.4	587	587;993;1007	1	38	0	7.845	7.2	9	1.7	403270000	29601000	44346000	10528000	1	2	1	15
H0YDK8;E7EWT3;Q5T1Z4;Q5T1Z8;Q14671-2;Q14671-3;H0YC97;H0YDC5	H0YDK8;E7EWT3;Q5T1Z4;Q5T1Z8;Q14671-2;Q14671-3	7;7;7;7;7;7;3;1	7;7;7;7;7;7;3;1	1;1;1;1;1;1;1;0	81908000	87347000	107540000	Pumilio homolog 1	PUM1	;;;;;	8	7	7	1	6	4	3	6	4	3	1	1	0	11.2	11.2	1.9	95.696	900	900;1044;1189;1224;1162;1188;227;217	1	55	0	10.759	9	6.4	3.4	1069200000	110150000	60972000	80351000	2	1	1	16
H0YDR3;Q8N5M4;E9PKV8	H0YDR3;Q8N5M4;E9PKV8	3;3;2	3;3;2	3;3;2	166940000	149520000	157030000	Tetratricopeptide repeat protein 9C	TTC9C	;;	3	3	3	3	2	2	3	2	2	3	2	2	3	55.1	55.1	55.1	8.1571	69	69;171;140	1	49	0	24.709	42	42	55.1	1887800000	138430000	138080000	142090000	2	3	3	32
H0YDU8;P53041;A8MU39;M0R196;E7EU14	H0YDU8;P53041;A8MU39	20;20;13;1;1	20;20;13;1;1	20;20;13;1;1	1235700000	1184500000	1369000000	Serine/threonine-protein phosphatase;Serine/threonine-protein phosphatase 5	PPP5C	;;	5	20	20	20	20	16	19	20	16	19	20	16	19	49.1	49.1	49.1	55.096	485	485;499;371;125;171	1	316	0	164.09	49.1	38.1	47.2	15296000000	1243600000	1189600000	1326900000	14	12	16	174
H0YEB6;O60232;G3V1B8;H0YEK1;E9PN57;E9PK41	H0YEB6;O60232;G3V1B8	6;6;5;2;1;1	6;6;5;2;1;1	6;6;5;2;1;1	169530000	290730000	303510000	Sjoegren syndrome/scleroderma autoantigen 1	SSSCA1	;;	6	6	6	6	5	5	6	5	5	6	5	5	6	61.1	61.1	61.1	20.916	193	193;199;162;107;60;81	1	77	0	17.05	47.2	47.2	61.1	2670900000	247990000	251270000	206230000	4	4	4	45
H0YEF3;E9PN81;Q8TDP1-2;Q8TDP1;H0YE52;H0YCP5;E9PKP0	H0YEF3;E9PN81;Q8TDP1-2;Q8TDP1;H0YE52;H0YCP5;E9PKP0	4;4;4;4;3;3;2	4;4;4;4;3;3;2	4;4;4;4;3;3;2	55235000	0	0	Ribonuclease H2 subunit C	RNASEH2C	;;;;;;	7	4	4	4	3	2	2	3	2	2	3	2	2	43.7	43.7	43.7	17.12	158	158;247;163;164;124;129;81	1	28	0	9.1203	31	21.5	15.8	389150000	55636000	35508000	21227000	1	1	0	6
H0YEF7;H0YD48;H0YEH1;H0YE97;H0YEY8	H0YEF7;H0YD48;H0YEH1;H0YE97;H0YEY8	4;3;3;2;2	1;1;1;1;1	1;1;1;1;1	0	0	52023000		PICALM	;;;;	5	4	1	1	3	3	3	1	1	1	1	1	1	27.5	9.3	9.3	31.358	302	302;264;308;134;215	1	12	0.00026164	3.2598	15.9	15.9	24.2	454050000	38033000	48208000	46270000	1	0	0	9
H0YFA4;P52943;P52943-2;H0YHD8	H0YFA4;P52943;P52943-2	3;3;3;1	3;3;3;1	3;3;3;1	148970000	144210000	174250000	Cysteine-rich protein 2	CRIP2	;;	4	3	3	3	3	3	2	3	3	2	3	3	2	34.9	34.9	34.9	20.6	192	192;208;282;104	1	41	0	17.189	34.9	34.9	26.6	1842700000	144590000	197070000	145930000	2	3	2	15
H0YGN0;F5GWI9;F5GXZ7;F5GZ97;Q9Y3C0	H0YGN0;F5GWI9;F5GXZ7;F5GZ97;Q9Y3C0	1;1;1;1;1	1;1;1;1;1	1;1;1;1;1	0	0	20904000	WASH complex subunit CCDC53	CCDC53	;;;;	5	1	1	1	1	1	1	1	1	1	1	1	1	13.1	13.1	13.1	11.414	107	107;169;173;193;194	1	11	0	3.9195	13.1	13.1	13.1	219190000	21429000	28829000	18592000	0	0	0	1
H0YH87;F8WB06;F8VQP2;V9GY86;Q99700-2;Q99700-4;Q99700;Q24JQ7;F8VVY6;F8VRK6;F8W0B5	H0YH87;F8WB06;F8VQP2;V9GY86;Q99700-2;Q99700-4;Q99700;Q24JQ7	6;6;6;6;6;6;6;5;1;1;1	5;5;5;5;5;5;5;4;1;1;1	5;5;5;5;5;5;5;4;1;1;1	45536000	44399000	0	Ataxin-2	ATXN2	;;;;;;;	11	6	5	5	4	4	2	4	3	2	4	3	2	8.2	7.3	7.3	98.004	916	916;1050;1073;1153;995;1243;1313;1006;184;235;285	1	43	0	6.2648	6.2	5.1	3.1	518540000	50334000	35028000	17842000	1	1	0	16
H0YJ75;Q13362-2;Q13362-3;Q13362;Q13362-4;Q13362-5;Q96B13;H0YN84;H0YJ49;H0YJU0;G3V2U3	H0YJ75;Q13362-2;Q13362-3;Q13362;Q13362-4;Q13362-5;Q96B13	9;9;9;9;9;9;7;4;2;2;2	4;4;4;4;4;4;3;2;1;1;1	4;4;4;4;4;4;3;2;1;1;1	57042000	56133000	68265000	Serine/threonine-protein phosphatase 2A 56 kDa regulatory subunit gamma isoform	PPP2R5C	;;;;;;	11	9	4	4	7	8	7	2	3	4	2	3	4	20.6	7.6	7.6	64.063	553	553;449;485;524;540;555;384;89;151;153;216	1	45	0	4.6875	17.5	18.8	15.2	691140000	44115000	53720000	57694000	1	0	1	9
H0YJM6	H0YJM6	1	1	1	0	0	33816000		GLRX5		1	1	1	1	1	1	1	1	1	1	1	1	1	12.4	12.4	12.4	15.123	137	137	1	16	0.0080701	1.8039	12.4	12.4	12.4	648850000	46354000	49340000	30077000	1	0	0	8
H0YJN8;G3V267;G3V5T0;G3V4T6;O43708-2;O43708	H0YJN8;G3V267;G3V5T0;G3V4T6;O43708-2;O43708	1;1;1;1;1;1	1;1;1;1;1;1	1;1;1;1;1;1	18165000	0	17733000	Maleylacetoacetate isomerase	GSTZ1	;;;;;	6	1	1	1	1	1	1	1	1	1	1	1	1	28.6	28.6	28.6	7.5454	70	70;189;202;217;161;216	1	16	0	4.246	28.6	28.6	28.6	118870000	18747000	19729000	16602000	2	0	1	6
H0YK36;C9JSG1;J3KPT0;Q6V1X1-6;Q6V1X1-4;Q6V1X1-2;Q6V1X1-5;Q6V1X1-3;Q6V1X1	H0YK36;C9JSG1;J3KPT0;Q6V1X1-6;Q6V1X1-4;Q6V1X1-2;Q6V1X1-5;Q6V1X1-3;Q6V1X1	1;1;1;1;1;1;1;1;1	1;1;1;1;1;1;1;1;1	1;1;1;1;1;1;1;1;1	0	0	11978000	Dipeptidyl peptidase 8	DPP8	;;;;;;;;	9	1	1	1	1	0	1	1	0	1	1	0	1	4.2	4.2	4.2	41.085	361	361;725;729;725;782;847;849;882;898	1	7	0.00026546	3.4428	4.2	0	4.2	95354000	13421000	0	10653000	0	0	0	0
H0YLF3	H0YLF3	4	1	1	0	0	13132000		B2M		1	4	1	1	2	2	3	0	0	1	0	0	1	78.9	18.3	18.3	8.4984	71	71	1	9	0.00025628	2.9369	28.2	28.2	46.5	105110000	0	0	11680000	0	0	0	3
H0YLW7;H0YMW8;H0YNF3;H0YMR6;H0YLE6;H0YL55;H7BXE3;Q9NWH9	H0YLW7;H0YMW8;H0YNF3;H0YMR6;H0YLE6;H0YL55;H7BXE3;Q9NWH9	1;1;1;1;1;1;1;1	1;1;1;1;1;1;1;1	1;1;1;1;1;1;1;1	0	12677000	0	SAFB-like transcription modulator	SLTM	;;;;;;;	8	1	1	1	1	1	0	1	1	0	1	1	0	30.6	30.6	30.6	6.6127	62	62;89;161;177;192;229;453;1034	1	5	0	11.359	30.6	30.6	0	48004000	11665000	14244000	0	1	0	0	1
H0YM21;H0YMJ0;H0YLJ3;B3KTM8;Q9UBU8-3;Q9UBU8-2;Q9UBU8;H0YLV1;H0YMT8;H0YNE0;H0YNX3	H0YM21;H0YMJ0;H0YLJ3;B3KTM8;Q9UBU8-3;Q9UBU8-2;Q9UBU8;H0YLV1;H0YMT8;H0YNE0	3;3;3;3;3;3;3;2;2;2;1	2;2;2;2;2;2;2;2;2;2;1	2;2;2;2;2;2;2;2;2;2;1	12195000	13358000	0	Mortality factor 4-like protein 1	MORF4L1	;;;;;;;;;	11	3	2	2	3	3	1	2	2	0	2	2	0	28.2	20.5	20.5	17.894	156	156;245;269;348;235;323;362;113;118;213;74	1	11	0.00050942	2.8857	28.2	28.2	7.7	86525000	11967000	16153000	0	1	1	0	4
H0YM23;O75179-6;O75179-7;O75179-2;O75179;H0YLQ3;O75179-5;O75179-3;O75179-4;H0YMS3	H0YM23;O75179-6;O75179-7;O75179-2;O75179;H0YLQ3;O75179-5;O75179-3;O75179-4	10;10;10;10;10;5;5;5;5;4	3;3;3;3;3;2;1;1;1;1	3;3;3;3;3;2;1;1;1;1	26359000	23032000	22072000	Ankyrin repeat domain-containing protein 17	ANKRD17	;;;;;;;;	10	10	3	3	7	7	6	2	2	2	2	2	2	5.6	1.4	1.4	263.25	2487	2487;2352;2490;2602;2603;862;751;1187;2010;828	1	23	0	5.5601	4.1	4.1	3.9	226730000	19969000	18824000	16019000	2	1	0	11
H0YMB3;H0YLV5;Q6PKC0;H0YNJ6;Q9P2T1;Q9P2T1-2;H0YL68;H0YKE1;H0YNS9;H0YMR9;H0YMV5;H0YLB8;H0YNH0;Q9P2T1-3	H0YMB3;H0YLV5;Q6PKC0;H0YNJ6;Q9P2T1;Q9P2T1-2;H0YL68;H0YKE1;H0YNS9;H0YMR9;H0YMV5;H0YLB8;H0YNH0;Q9P2T1-3	2;2;2;2;2;2;1;1;1;1;1;1;1;1	2;2;2;2;2;2;1;1;1;1;1;1;1;1	2;2;2;2;2;2;1;1;1;1;1;1;1;1	15487000	0	0	GMP reductase;GMP reductase 2	GMPR2	;;;;;;;;;;;;;	14	2	2	2	2	1	1	2	1	1	2	1	1	8.3	8.3	8.3	33.921	315	315;333;409;427;348;366;57;64;125;131;151;169;239;320	1	16	0.0002586	3.1119	8.3	2.9	2.9	127110000	13738000	9575600	6796800	1	1	0	7
H0YMG7;O94788-2;O94788-3;O94788;O94788-4;Q9UED3;H0YKL3;H0Y2X5;P00352;P47895	H0YMG7;O94788-2;O94788-3;O94788;O94788-4	5;5;5;5;4;1;1;1;1;1	3;3;3;3;3;1;1;0;0;0	3;3;3;3;3;1;1;0;0;0	0	0	24547000	Retinal dehydrogenase 2	ALDH1A2	;;;;	10	5	3	3	3	3	4	1	1	2	1	1	2	10	7	7	53.762	489	489;480;497;518;422;25;85;405;501;512	1	18	0	3.8358	4.5	4.5	7.4	256550000	9780600	55555000	21833000	0	0	0	1
H0YMK9;P39880-9;Q13948-9;Q13948-10;Q13948-2;Q13948	H0YMK9;P39880-9;Q13948-9;Q13948-10;Q13948-2;Q13948	1;1;1;1;1;1	1;1;1;1;1;1	1;1;1;1;1;1	0	3604900	0	Protein CASP	CUX1	;;;;;	6	1	1	1	1	1	0	1	1	0	1	1	0	7.1	7.1	7.1	27.451	241	241;632;639;662;676;678	1	5	0.0097749	1.673	7.1	7.1	0	26414000	6474800	4050300	0	0	1	0	1
H0YMV8;Q71UM5;C9JLI6	H0YMV8;Q71UM5;C9JLI6	3;3;2	1;1;1	1;1;1	132720000	144850000	0	40S ribosomal protein S27;40S ribosomal protein S27-like	RPS27L	;;	3	3	1	1	3	3	3	1	1	1	1	1	1	32	11	11	11.345	100	100;84;97	1	23	0	33.624	32	32	32	1462600000	135110000	171140000	63913000	2	1	1	12
H0YNG3;P67812-4;P67812;P67812-3;H0YNX5;P67812-2;H0YKT4;H0YNA5;P0C7V7	H0YNG3;P67812-4;P67812;P67812-3;H0YNX5;P67812-2;H0YKT4;H0YNA5	6;6;6;6;4;4;3;3;1	6;6;6;6;4;4;3;3;1	6;6;6;6;4;4;3;3;1	461460000	461000000	407900000	Signal peptidase complex catalytic subunit SEC11;Signal peptidase complex catalytic subunit SEC11A;Signal peptidase I	SEC11A	;;;;;;;	9	6	6	6	6	6	6	6	6	6	6	6	6	27.6	27.6	27.6	18.651	163	163;164;179;185;106;153;129;135;166	1	77	0	11.975	27.6	27.6	27.6	5579100000	495040000	511000000	353400000	3	4	2	35
H0YNP1;O94923	H0YNP1;O94923	3;3	3;3	3;3	19082000	0	0	D-glucuronyl C5-epimerase	GLCE	;	2	3	3	3	3	1	1	3	1	1	3	1	1	7.6	7.6	7.6	62.886	553	553;617	1	15	0	5.3926	7.6	3.8	1.6	106710000	19878000	8828900	5845900	1	1	0	6
H0YNW5;P33316-2;P33316;H0YKC5;H0YMM5;H0YNJ9;H0YKI0;H0YMP1	H0YNW5;P33316-2;P33316;H0YKC5;H0YMM5;H0YNJ9;H0YKI0	9;9;9;8;6;6;6;3	9;9;9;8;6;6;6;3	9;9;9;8;6;6;6;3	887860000	866090000	901830000	Deoxyuridine 5-triphosphate nucleotidohydrolase, mitochondrial	DUT	;;;;;;	8	9	9	9	9	9	7	9	9	7	9	9	7	61.7	61.7	61.7	17.827	167	167;164;252;221;133;143;226;107	1	156	0	119.02	61.7	61.7	55.7	11143000000	998400000	978780000	705690000	6	11	8	98
H3BLU7;O43488;H7C5H7;Q8NHP1	H3BLU7;O43488	8;8;1;1	8;8;1;1	8;8;1;1	385280000	336240000	270280000	Aflatoxin B1 aldehyde reductase member 2	AKR7A2	;	4	8	8	8	8	7	7	8	7	7	8	7	7	45.2	45.2	45.2	34.684	314	314;359;205;331	1	109	0	54.383	45.2	34.7	41.7	3450200000	536250000	498650000	289760000	8	7	4	56
H3BLV9;B4DS61;Q96SB4;Q96SB4-3;Q5R363;A8MPP7;A8MPY5;E7ETV6;Q9UPE1-2;Q9UPE1-3;Q9UPE1-4;Q9UPE1;H7C2I2	H3BLV9;B4DS61;Q96SB4;Q96SB4-3;Q5R363	12;12;12;12;9;2;2;2;2;2;2;2;1	12;12;12;12;9;2;2;2;2;2;2;2;1	9;9;9;9;8;0;0;0;0;0;0;0;0	151960000	130100000	194960000	SRSF protein kinase 1	SRPK1	;;;;	13	12	12	9	11	9	10	11	9	10	9	7	7	22.8	22.8	17.6	76.039	671	671;639;655;826;547;492;534;634;491;533;566;567;129	1	106	0	32.499	21	16.2	19.2	2032600000	202190000	163490000	185240000	4	6	3	46
H3BLZ8;Q92841;Q92841-1;Q92841-3;C9JMU5;Q92841-2;G5E9L5	H3BLZ8;Q92841;Q92841-1;Q92841-3;C9JMU5;Q92841-2	28;28;27;27;26;26;2	19;19;18;18;18;18;2	19;19;18;18;18;18;2	1660300000	1654800000	1719600000	Probable ATP-dependent RNA helicase DDX17	DDX17	;;;;;	7	28	19	19	27	25	28	18	17	19	18	17	19	42	30.2	30.2	80.439	731	731;729;650;652;652;652;181	1	315	0	199.61	40.2	38.6	42	19551000000	1725200000	1768700000	1524400000	16	17	13	166
H3BM14;H3BM74;Q9Y5A7-2;Q9Y5A7;H7C5N1;H7C5E1;C9J7X7;C9JRT6;F8WDB6	H3BM14;H3BM74;Q9Y5A7-2;Q9Y5A7;H7C5N1	4;4;4;4;2;1;1;1;1	4;4;4;4;2;1;1;1;1	4;4;4;4;2;1;1;1;1	33653000	33361000	38485000	NEDD8 ultimate buster 1	NUB1	;;;;	9	4	4	4	4	2	4	4	2	4	4	2	4	7.7	7.7	7.7	71.921	625	625;639;601;615;202;128;154;254;267	1	34	0	6.5572	7.7	3.8	7.7	422810000	53946000	26962000	51729000	0	0	2	7
H3BM67;H3BUP2;H3BUN4;O60936-2;O60936-3;O60936;J3QLT7;H3BQJ5	H3BM67;H3BUP2;H3BUN4;O60936-2;O60936-3;O60936	5;5;5;5;5;3;1;1	5;5;5;5;5;3;1;1	5;5;5;5;5;3;1;1	94906000	99422000	86131000	Nucleolar protein 3	NOL3	;;;;;	8	5	5	5	5	4	4	5	4	4	5	4	4	59.4	59.4	59.4	14.924	138	138;174;206;208;270;219;131;216	1	52	0	20.189	59.4	45.7	40.6	1003400000	118970000	113030000	82741000	5	4	2	30
H3BMF4;Q9H2V7-3;Q9H2V7-2;Q9H2V7;Q9H2V7-4;H3BR82;H3BPT8;H3BPQ9;Q9H2V7-5;H3BT44	H3BMF4;Q9H2V7-3;Q9H2V7-2;Q9H2V7;Q9H2V7-4;H3BR82	5;5;5;5;4;3;2;2;2;1	5;5;5;5;4;3;2;2;2;1	5;5;5;5;4;3;2;2;2;1	122900000	125470000	135050000	Protein spinster homolog 1	SPNS1	;;;;;	10	5	5	5	5	5	3	5	5	3	5	5	3	11.9	11.9	11.9	61.105	573	573;454;476;528;455;538;179;274;229;178	1	70	0	27.653	11.9	11.9	6.8	1507300000	143530000	165830000	85773000	5	5	4	39
H3BNK8;H3BU96;H3BNT4;Q99547	H3BNK8;H3BU96;H3BNT4;Q99547	1;1;1;1	1;1;1;1	1;1;1;1	0	0	20218000	M-phase phosphoprotein 6	MPHOSPH6	;;;	4	1	1	1	1	1	1	1	1	1	1	1	1	27.3	27.3	27.3	6.7357	55	55;97;142;160	1	7	0.0017509	2.6519	27.3	27.3	27.3	144790000	20874000	23435000	17982000	0	0	1	3
H3BNT2;O75208;H3BPY0;H3BPC6;H3BSJ5;H3BPW3;H3BVA5;H3BRC0;O75208-2	H3BNT2;O75208;H3BPY0;H3BPC6;H3BSJ5	3;3;2;2;2;1;1;1;1	3;3;2;2;2;1;1;1;1	3;3;2;2;2;1;1;1;1	0	34133000	22722000	Ubiquinone biosynthesis protein COQ9, mitochondrial	COQ9	;;;;	9	3	3	3	1	2	2	1	2	2	1	2	2	15.8	15.8	15.8	33.886	303	303;318;89;188;283;102;172;207;135	1	29	0	4.377	3.6	10.6	12.2	301110000	17983000	27609000	15971000	1	3	1	14
H3BNX8;P20674;H3BRM5;H3BV69;H3BRI0	H3BNX8;P20674;H3BRM5;H3BV69	5;5;3;3;1	5;5;3;3;1	5;5;3;3;1	866940000	1063400000	1032600000	Cytochrome c oxidase subunit 5A, mitochondrial	COX5A	;;;	5	5	5	5	5	5	4	5	5	4	5	5	4	31.4	31.4	31.4	17.235	153	153;150;69;111;84	1	104	0	8.8711	31.4	31.4	30.7	11223000000	915680000	1021000000	812980000	2	2	2	35
H3BP20;P06865;H3BS10;E9PGL4;H3BU85;H3BTD4;B4DKE7	H3BP20;P06865;H3BS10;E9PGL4;H3BU85;H3BTD4	10;10;9;6;5;5;3	10;10;9;6;5;5;3	10;10;9;6;5;5;3	236270000	217410000	188640000	Beta-hexosaminidase;Beta-hexosaminidase subunit alpha	HEXA	;;;;;	7	10	10	10	8	7	6	8	7	6	8	7	6	20.6	20.6	20.6	61.999	540	540;529;509;301;318;373;168	1	99	0	22.726	14.8	12.8	10.7	2680100000	258430000	225020000	130450000	4	4	2	44
H3BP71;O75150;O75150-4;F8W8Z4;O75150-3;H3BQ99;H3BUL6;I3L332;H3BS50	H3BP71;O75150;O75150-4;F8W8Z4;O75150-3	12;12;11;9;8;2;2;2;2	12;12;11;9;8;2;2;2;2	11;11;10;8;7;2;2;2;2	142910000	173320000	145520000	E3 ubiquitin-protein ligase BRE1B	RNF40	;;;;	9	12	12	11	9	10	9	9	10	9	8	9	8	15.6	15.6	14.2	109.02	961	961;1001;901;693;838;111;129;144;174	1	103	0	20.836	11.2	12.6	10.9	1885400000	227180000	224520000	136440000	2	5	0	35
H3BPJ9;O96000;H3BV16;Q96II6	H3BPJ9;O96000;H3BV16;Q96II6	5;5;4;4	5;5;4;4	5;5;4;4	259390000	272050000	357910000	NADH dehydrogenase [ubiquinone] 1 beta subcomplex subunit 10	NDUFB10	;;;	4	5	5	5	5	5	5	5	5	5	5	5	5	38.5	38.5	38.5	19.258	161	161;172;142;168	1	73	0	25.656	38.5	38.5	38.5	3334700000	279250000	317230000	345940000	4	6	4	47
H3BPM8;Q2TA70;B4DFF3;Q13286-4;Q13286-2;B4DXL3;Q13286-3;Q13286;O95090;Q9UBD8;H3BQ48;B4DMY6;Q13286-5;Q13286-6	H3BPM8;Q2TA70;B4DFF3;Q13286-4;Q13286-2;B4DXL3;Q13286-3;Q13286;O95090;Q9UBD8;H3BQ48;B4DMY6;Q13286-5;Q13286-6	2;2;2;2;2;2;2;2;1;1;1;1;1;1	2;2;2;2;2;2;2;2;1;1;1;1;1;1	2;2;2;2;2;2;2;2;1;1;1;1;1;1	72992000	78318000	63034000	Battenin	CLN3	;;;;;;;;;;;;;	14	2	2	2	2	2	2	2	2	2	2	2	2	9.4	9.4	9.4	36.272	341	341;360;384;321;390;414;421;438;167;181;184;338;253;339	1	36	0	4.692	9.4	9.4	9.4	996610000	68191000	98243000	65643000	0	1	1	10
H3BPX2;Q5VST9-5;Q5VST9-3;Q5VST9;Q5VST9-2;Q5VST9-6	H3BPX2;Q5VST9-5;Q5VST9-3;Q5VST9;Q5VST9-2;Q5VST9-6	1;1;1;1;1;1	1;1;1;1;1;1	1;1;1;1;1;1	0	81866000	0	Obscurin	OBSCN	;;;;;	6	1	1	1	1	1	0	1	1	0	1	1	0	0.2	0.2	0.2	972.99	8923	8923;3911;6620;7968;7969;8483	1	8	1	-2	0.2	0.2	0	456040000	69195000	91982000	0	1	1	0	5
H3BQG3;Q8NCN5;A8MT40	H3BQG3;Q8NCN5;A8MT40	4;4;2	4;4;2	4;4;2	0	0	32384000	Pyruvate dehydrogenase phosphatase regulatory subunit, mitochondrial	PDPR	;;	3	4	4	4	2	4	2	2	4	2	2	4	2	9.2	9.2	9.2	54.79	491	491;879;779	1	30	0.00026896	3.5988	6.3	9.2	5.1	306730000	20122000	48472000	23278000	0	0	1	4
H3BQK0;Q9UMR2;Q9UMR2-2;Q9UMR2-4;Q9UMR2-3;H3BN59;H3BMQ5;H3BTB3	H3BQK0;Q9UMR2;Q9UMR2-2;Q9UMR2-4;Q9UMR2-3	17;17;16;16;15;8;7;2	2;2;1;1;2;2;2;0	2;2;1;1;2;2;2;0	0	0	11570000	ATP-dependent RNA helicase DDX19B	DDX19B	;;;;	8	17	2	2	12	13	14	1	1	1	1	1	1	48.3	9.1	9.1	54.499	484	484;479;448;454;371;261;233;129	1	9	0	3.995	32.9	39.3	38.4	94998000	9794800	19680000	10291000	1	1	1	8
H3BQZ7;Q1KMD3	H3BQZ7;Q1KMD3	14;14	14;14	14;14	185220000	256500000	241100000	Heterogeneous nuclear ribonucleoprotein U-like protein 2	HNRNPUL2-BSCL2;HNRNPUL2	;	2	14	14	14	7	11	9	7	11	9	7	11	9	26.8	26.8	26.8	84.69	746	746;747	1	116	0	75.074	17.2	22.8	17.7	2893300000	180780000	361280000	184650000	2	3	4	48
H3BR25;H3BPT1;H3BN58;H3BSZ4;Q9BVC4-4;Q9BVC4;H3BR38;H3BM50;H3BPU5;Q9BVC4-3;Q9BVC4-5	H3BR25;H3BPT1;H3BN58;H3BSZ4;Q9BVC4-4;Q9BVC4;H3BR38;H3BM50;H3BPU5;Q9BVC4-3;Q9BVC4-5	2;2;2;2;2;2;1;1;1;1;1	2;2;2;2;2;2;1;1;1;1;1	2;2;2;2;2;2;1;1;1;1;1	0	0	29710000	Target of rapamycin complex subunit LST8	MLST8	;;;;;;;;;;	11	2	2	2	1	0	2	1	0	2	1	0	2	31.9	31.9	31.9	18.42	166	166;198;202;275;217;326;72;116;131;260;325	1	9	0.002924	2.384	21.1	0	31.9	151260000	5981100	0	26424000	0	0	0	2
H3BR94;Q9BTE1-2;Q9BTE1;H3BUD2;H3BS05;Q9BTE1-3	H3BR94;Q9BTE1-2;Q9BTE1;H3BUD2;H3BS05;Q9BTE1-3	3;3;3;2;2;2	3;3;3;2;2;2	3;3;3;2;2;2	0	0	73421000	Dynactin subunit 5	DCTN5	;;;;;	6	3	3	3	2	2	3	2	2	3	2	2	3	20	20	20	16.91	155	155;152;182;53;75;84	1	33	0	4.1896	13.5	13.5	20	775090000	45981000	40313000	63449000	0	1	0	8
H3BRB1;F5H0R1;Q9H6E5	H3BRB1;F5H0R1;Q9H6E5	1;1;1	1;1;1	1;1;1	20419000	0	0	Speckle targeted PIP5K1A-regulated poly(A) polymerase	TUT1	;;	3	1	1	1	1	0	0	1	0	0	1	0	0	2.9	2.9	2.9	56.516	525	525;912;874	1	4	0.00025747	3.035	2.9	0	0	58571000	21271000	0	0	1	0	0	2
H3BRL3;O14562;H3BUM8	H3BRL3;O14562	3;3;1	3;3;1	3;3;1	81057000	63246000	75486000	Ubiquitin domain-containing protein UBFD1	UBFD1	;	3	3	3	3	2	2	3	2	2	3	2	2	3	13.7	13.7	13.7	32.64	300	300;309;190	1	37	0	15.67	9.7	9.7	13.7	733480000	52273000	67503000	77551000	2	2	3	23
H3BRW3;H3BRD2;P55789	H3BRW3;H3BRD2;P55789	1;1;1	1;1;1	1;1;1	0	8277500	0	Sulfhydryl oxidase;FAD-linked sulfhydryl oxidase ALR	GFER	;;	3	1	1	1	0	1	0	0	1	0	0	1	0	11	11	11	11.66	109	109;139;205	1	1	0.0080738	1.807	0	11	0	9300400	0	9300400	0	0	1	0	1
H3BSH7;Q969X6-2;Q969X6	H3BSH7;Q969X6-2;Q969X6	1;1;1	1;1;1	1;1;1	0	9384400	0	Cirhin	CIRH1A	;;	3	1	1	1	1	1	0	1	1	0	1	1	0	2	2	2	77.942	700	700;571;686	1	5	0.0097661	1.6626	2	2	0	41534000	8556400	10544000	0	0	0	0	1
H3BSM5;P60520;H3BU36;H3BQ50;F5GZY7;Q9H0R8;Q9H0R8-2	H3BSM5;P60520	3;3;1;1;1;1;1	3;3;1;1;1;1;1	2;2;1;1;0;0;0	0	270640000	240980000	Gamma-aminobutyric acid receptor-associated protein-like 2	GABARAPL2	;	7	3	3	2	1	3	3	1	3	3	1	2	2	26.1	26.1	18.2	10.401	88	88;117;42;57;70;117;146	1	39	0.004496	2.0566	9.1	26.1	26.1	2591300000	11921000	327290000	221710000	0	2	2	17
H3BSZ7;Q8NCF5-3;Q8NCF5-2;Q8NCF5	H3BSZ7;Q8NCF5-3;Q8NCF5-2;Q8NCF5	1;1;1;1	1;1;1;1	1;1;1;1	0	10196000	0	NFATC2-interacting protein	NFATC2IP	;;;	4	1	1	1	0	1	0	0	1	0	0	1	0	10.7	10.7	10.7	15.338	140	140;127;138;419	1	5	0.0031431	2.2942	0	10.7	0	44407000	0	11456000	0	0	0	0	1
H3BT71;P38159;H3BR27;H0Y6E7;P38159-2;H3BNC1;Q96E39;O75526;Q8N7X1	H3BT71;P38159;H3BR27;H0Y6E7;P38159-2;H3BNC1;Q96E39;O75526	6;6;5;5;5;3;3;3;1	6;6;5;5;5;3;3;3;1	1;1;0;1;1;0;0;0;0	253780000	316650000	318090000	RNA-binding motif protein, X chromosome;RNA-binding motif protein, X chromosome, N-terminally processed;RNA binding motif protein, X-linked-like-1;RNA-binding motif protein, X-linked-like-2	RBMX;RBMXL1;RBMXL2	;;;;;;;	9	6	6	1	5	5	6	5	5	6	1	1	1	21.6	21.6	4.4	32.197	296	296;391;78;292;378;37;390;392;1067	1	97	0	20.585	18.9	18.9	21.6	3547000000	254430000	348130000	302410000	4	5	3	49
H3BTD3;H3BMD8;P56211-2;P56211	H3BTD3;H3BMD8;P56211-2;P56211	2;2;2;2	1;1;1;1	1;1;1;1	0	0	27070000	cAMP-regulated phosphoprotein 19	ARPP19	;;;	4	2	1	1	2	2	2	1	1	1	1	1	1	26.4	11.1	11.1	8.1272	72	72;131;96;112	1	10	1	-2	26.4	26.4	26.4	274810000	30373000	28353000	24076000	0	0	0	2
H3BTL1;Q9GZQ8;A6NCE7;Q9H492;Q9H492-2	H3BTL1;Q9GZQ8;A6NCE7;Q9H492;Q9H492-2	2;2;2;1;1	2;2;2;1;1	2;2;2;1;1	309120000	294140000	358390000	Microtubule-associated proteins 1A/1B light chain 3B;Microtubule-associated proteins 1A/1B light chain 3 beta 2;Microtubule-associated proteins 1A/1B light chain 3A	MAP1LC3B;MAP1LC3B2;MAP1LC3A	;;;;	5	2	2	2	2	2	2	2	2	2	2	2	2	28	28	28	9.0115	75	75;125;125;121;125	1	36	0	13.079	28	28	28	3771700000	317270000	329160000	320210000	1	3	2	26
H3BU22;Q9NZC3	H3BU22;Q9NZC3	1;1	1;1	1;1	6387300	0	0	Glycerophosphodiester phosphodiesterase 1	GDE1	;	2	1	1	1	1	0	0	1	0	0	1	0	0	13.9	13.9	13.9	12.06	108	108;331	1	7	0.0084901	1.76	13.9	0	0	97434000	6653900	0	0	0	0	0	1
H3BU93;Q9GZU8;H3BNK9;H3BUL4;H3BMX9;H3BQQ6;H3BTI2;H3BTP8;H3BSY6;H3BP64	H3BU93;Q9GZU8;H3BNK9;H3BUL4;H3BMX9	3;3;2;2;2;1;1;1;1;1	3;3;2;2;2;1;1;1;1;1	3;3;2;2;2;1;1;1;1;1	81790000	99671000	87843000	Protein FAM192A	FAM192A	;;;;	10	3	3	3	2	3	3	2	3	3	2	3	3	16.4	16.4	16.4	19.351	177	177;254;154;160;165;96;106;130;140;148	1	34	0	6.8186	7.9	16.4	16.4	836590000	98480000	105340000	71887000	1	2	2	13
H3BUF6;Q8WWM7-6;Q8WWM7-8;Q8WWM7-5;Q8WWM7-4;Q8WWM7-9;Q8WWM7-2;Q8WWM7;Q8WWM7-3;H3BSK9;Q8WWM7-7;H3BSQ5;H3BUE3;S4R3J6;H3BRB0;F8WB05	H3BUF6;Q8WWM7-6;Q8WWM7-8;Q8WWM7-5;Q8WWM7-4;Q8WWM7-9;Q8WWM7-2;Q8WWM7;Q8WWM7-3;H3BSK9	23;23;23;23;23;23;23;23;23;12;11;5;5;1;1;1	23;23;23;23;23;23;23;23;23;12;11;5;5;1;1;1	22;22;22;22;22;22;22;22;22;12;11;5;5;0;1;0	665490000	712520000	629710000	Ataxin-2-like protein	ATXN2L	;;;;;;;;;	16	23	23	22	19	22	17	19	22	17	19	21	17	24.6	24.6	23.9	112.71	1068	1068;968;1044;1044;1044;1062;1062;1075;1097;336;399;91;217;107;401;424	1	268	0	68.976	20.5	22.9	18.1	7778400000	628720000	772870000	502970000	11	11	9	124
H3BUK6;H3BP13;Q9UL33-2;Q9UL33;H3BPN3;H3BQQ8	H3BUK6;H3BP13;Q9UL33-2;Q9UL33;H3BPN3;H3BQQ8	2;2;2;2;1;1	2;2;2;2;1;1	2;2;2;2;1;1	0	23189000	0	Trafficking protein particle complex subunit 2-like protein	TRAPPC2L	;;;;;	6	2	2	2	0	2	0	0	2	0	0	2	0	24.8	24.8	24.8	12.561	109	109;241;139;140;75;129	1	8	0	4.8482	0	24.8	0	106330000	0	25670000	0	0	1	0	5
H3BUX2;O43169;D6RFH4	H3BUX2;O43169;D6RFH4	5;5;4	1;1;1	1;1;1	0	22908000	0	Cytochrome b5 type B	CYB5B	;;	3	5	1	1	4	5	4	0	1	0	0	1	0	60.7	7.9	7.9	15.716	140	140;146;131	1	7	0.0002584	3.096	52.9	60.7	52.9	183710000	0	25739000	0	0	0	0	1
H3BV80;H3BMM9;H3BTC0;Q15287;H3BMS0;Q15287-3;Q15287-2;H3BPG5;H3BRK4;H3BTV0;H3BNI3;H3BP82;H3BTR6;H3BUG0;H3BTY0;H3BNU7;H3BUL0	H3BV80;H3BMM9;H3BTC0;Q15287;H3BMS0;Q15287-3;Q15287-2;H3BPG5	4;4;4;4;3;3;3;2;1;1;1;1;1;1;1;1;1	4;4;4;4;3;3;3;2;1;1;1;1;1;1;1;1;1	4;4;4;4;3;3;3;2;1;1;1;1;1;1;1;1;1	78414000	95844000	108570000	RNA-binding protein with serine-rich domain 1	RNPS1	;;;;;;;	17	4	4	4	4	4	3	4	4	3	4	4	3	19.9	19.9	19.9	24.561	211	211;284;302;305;257;268;282;128;29;45;85;98;127;139;150;156;169	1	45	0	20.059	19.9	19.9	16.6	1034900000	90341000	107990000	107320000	2	4	4	24
H3BVF7;Q0P6H9;H3BPV2	H3BVF7;Q0P6H9	6;6;2	6;6;2	6;6;2	53659000	35642000	35373000	Transmembrane protein 62	TMEM62	;	3	6	6	6	4	3	3	4	3	3	4	3	3	13.7	13.7	13.7	61.933	540	540;643;129	1	45	0	9.9565	8.1	5.6	6.1	411160000	47369000	32694000	25740000	2	0	0	9
H3BVG0;Q8N1F7;Q8N1F7-2;H3BRI8;H3BM93;H3BNN5;H3BV11;H3BPA9;H3BP95;H3BMX0;H3BVE2;H3BRD9;H3BNG7;H3BV15	H3BVG0;Q8N1F7;Q8N1F7-2	18;18;13;6;6;5;5;5;4;3;2;2;1;1	18;18;13;6;6;5;5;5;4;3;2;2;1;1	18;18;13;6;6;5;5;5;4;3;2;2;1;1	226520000	240950000	254200000	Nuclear pore complex protein Nup93	NUP93	;;	14	18	18	18	16	14	15	16	14	15	16	14	15	26	26	26	99.554	880	880;819;696;151;178;132;136;229;156;125;117;140;40;84	1	172	0	33.921	23.5	20.9	22.7	2832400000	268920000	311280000	220340000	6	3	6	59
H3BVI4	H3BVI4	2	2	2	0	0	916680000	Lipase maturation factor	LMF1		1	2	2	2	1	1	2	1	1	2	1	1	2	2.3	2.3	2.3	40.147	350	350	1	47	1	-2	2	2	2.3	14490000000	1178500000	1196700000	884460000	1	0	1	16
H7BXH2;E9PKF6;G8JLI3;Q5H9R7-6;Q5H9R7-2;Q5H9R7;Q5H9R7-5;Q5H9R7-3;Q5H9R7-4;E9PQP7;E9PK08;H0YEN2;E9PNN8;E9PJD8;E9PKG4;H0YDW1	H7BXH2;E9PKF6;G8JLI3;Q5H9R7-6;Q5H9R7-2;Q5H9R7;Q5H9R7-5;Q5H9R7-3;Q5H9R7-4;E9PQP7	18;18;18;18;18;18;18;17;17;11;7;7;6;2;2;2	18;18;18;18;18;18;18;17;17;11;7;7;6;2;2;2	18;18;18;18;18;18;18;17;17;11;7;7;6;2;2;2	369770000	320740000	333730000	Serine/threonine-protein phosphatase 6 regulatory subunit 3	PPP6R3	;;;;;;;;;	16	18	18	18	12	10	12	12	10	12	12	10	12	25.6	25.6	25.6	92.407	827	827;838;879;844;867;873;879;791;793;641;140;580;186;39;75;112	1	214	0	47.996	17	15	18	4444200000	281890000	264350000	272720000	6	5	7	73
H7BXI1;A0FGR8-2;A0FGR8;A0FGR8-6;A0FGR8-4;F2Z3K9;A0FGR8-5	H7BXI1;A0FGR8-2;A0FGR8;A0FGR8-6;A0FGR8-4;F2Z3K9;A0FGR8-5	16;16;16;16;9;8;8	16;16;16;16;9;8;8	16;16;16;16;9;8;8	242560000	276910000	289370000	Extended synaptotagmin-2	ESYT2	;;;;;;	7	16	16	16	12	12	13	12	12	13	12	12	13	28.6	28.6	28.6	98.008	884	884;893;921;942;527;328;328	1	179	0	69.467	21.2	21	23.1	3548400000	262360000	313920000	294560000	5	4	9	70
H7BXY3;Q7L2E3-3;Q7L2E3;Q7L2E3-2	H7BXY3;Q7L2E3-3;Q7L2E3;Q7L2E3-2	21;21;21;21	21;21;21;21	21;21;21;21	286880000	312360000	253160000	Putative ATP-dependent RNA helicase DHX30	DHX30	;;;	4	21	21	21	14	13	11	14	13	11	14	13	11	20.8	20.8	20.8	130.55	1166	1166;1155;1194;1222	1	187	0	42.981	13.6	14	11.7	3284200000	284180000	366910000	214690000	5	9	4	74
H7BY58;P22061;P22061-2;B7Z972;F8WDT3;F8WAV5;F8WAX2;C9J0F2;H7C4X2	H7BY58;P22061;P22061-2;B7Z972	11;11;11;9;3;3;3;2;1	11;11;11;9;3;3;3;2;1	11;11;11;9;3;3;3;2;1	1549000000	1294100000	1494000000	Protein-L-isoaspartate O-methyltransferase;Protein-L-isoaspartate(D-aspartate) O-methyltransferase	PCMT1	;;;	9	11	11	11	9	10	11	9	10	11	9	10	11	49.7	49.7	49.7	30.358	286	286;227;228;192;120;124;130;96;67	1	191	0	85.322	45.1	49.7	49.7	17580000000	1792400000	1267000000	1369600000	10	11	12	123
H7BY81;Q9BZ19	H7BY81;Q9BZ19	1;1	1;1	1;1	0	0	16314000	Ankyrin repeat domain-containing protein 60	ANKRD60	;	2	1	1	1	0	1	1	0	1	1	0	1	1	2.6	2.6	2.6	37.028	341	341;345	1	11	1	-2	0	2.6	2.6	332510000	0	9344900	14510000	0	0	0	3
H7BZ77;A8MWR6;Q9Y3Q8;Q5JRJ0;E7EWD5;Q99576-4;Q99576;Q99576-3	H7BZ77;A8MWR6;Q9Y3Q8	3;3;3;1;1;1;1;1	2;2;2;0;0;0;0;0	2;2;2;0;0;0;0;0	20601000	0	0	TSC22 domain family protein 4	TSC22D4	;;	8	3	2	2	2	0	1	2	0	1	2	0	1	18.5	14.2	14.2	21.739	211	211;156;395;110;132;122;134;200	1	15	0	3.9161	14.2	0	8.5	119850000	21461000	0	7756100	0	0	0	1
H7BZJ3	H7BZJ3	7	1	1	599540000	1048100000	951670000		PDIA3		1	7	1	1	7	6	7	1	1	1	1	1	1	54.5	11.4	11.4	13.519	123	123	1	24	0	21.937	54.5	54.5	54.5	10465000000	664900000	1256100000	822840000	1	2	2	14
H7BZT4;P61956-2;P61956;Q6EEV6	H7BZT4;P61956-2;P61956;Q6EEV6	2;2;2;1	2;2;2;1	1;1;1;0	1401400000	1315400000	1065700000	Small ubiquitin-related modifier 2;Small ubiquitin-related modifier 4	SUMO2;SUMO4	;;;	4	2	2	1	2	2	2	2	2	2	1	1	1	23.2	23.2	10.5	10.839	95	95;71;95;95	1	45	0	17.775	23.2	23.2	23.2	15147000000	1602200000	1698900000	787470000	2	3	2	28
H7BZW6;X6RAL5;O00422;U3KPY7	H7BZW6;X6RAL5;O00422	5;5;5;2	5;5;5;2	5;5;5;2	0	62051000	82270000	Histone deacetylase complex subunit SAP18	SAP18	;;	4	5	5	5	3	2	4	3	2	4	3	2	4	49.7	49.7	49.7	16.036	143	143;172;153;78	1	54	0	9.3276	28.7	24.5	39.9	768890000	48567000	18469000	98182000	1	0	4	13
H7C022;Q8WVS4	H7C022;Q8WVS4	2;2	2;2	2;2	0	31710000	0	WD repeat-containing protein 60	WDR60	;	2	2	2	2	1	2	1	1	2	1	1	2	1	3.3	3.3	3.3	60.659	522	522;1066	1	15	0.0097995	1.6914	1.3	3.3	1.3	255670000	15936000	35629000	14209000	0	1	0	2
H7C0D5;Q9BSR8	H7C0D5;Q9BSR8	2;2	2;2	2;2	68664000	0	100930000	Protein YIPF4	YIPF4	;	2	2	2	2	2	1	2	2	1	2	2	1	2	31	31	31	6.447	58	58;244	1	18	0.00026947	3.6191	31	15.5	31	693350000	70730000	46491000	81199000	1	0	2	8
H7C0E5;O75312;H7BZM7	H7C0E5;O75312;H7BZM7	7;7;6	7;7;6	7;7;6	84194000	68485000	74324000	Zinc finger protein ZPR1	ZPR1	;;	3	7	7	7	6	6	7	6	6	7	6	6	7	23.1	23.1	23.1	42.542	386	386;459;430	1	58	0	21.522	19.9	19.4	23.1	857230000	101170000	102920000	89477000	0	1	3	17
H7C0X4;Q92685;B4DS50;C9J7S5;Q92685-2;F8WF93;H7BZZ2;F8WE30	H7C0X4;Q92685;B4DS50;C9J7S5;Q92685-2	4;4;3;3;3;1;1;1	4;4;3;3;3;1;1;1	4;4;3;3;3;1;1;1	51364000	34924000	0	Dol-P-Man:Man(5)GlcNAc(2)-PP-Dol alpha-1,3-mannosyltransferase	ALG3	;;;;	8	4	4	4	3	3	1	3	3	1	3	3	1	13.3	13.3	13.3	36.898	323	323;438;382;398;390;65;105;107	1	32	0	5.9824	10.2	9.6	3.1	442460000	49915000	23118000	2115300	2	1	0	14
H7C144	H7C144	25	1	1	0	0	9749000		ACTN4		1	25	1	1	23	23	25	1	1	1	1	1	1	78.7	3.2	3.2	39.001	342	342	1	11	1	-2	78.4	78.4	78.7	119670000	12475000	13137000	8670900	0	0	0	1
H7C173;H7C202;B8ZZ87;Q6P582;Q6NZ67;H7BZ50	H7C173;H7C202;B8ZZ87;Q6P582;Q6NZ67;H7BZ50	3;3;3;3;3;2	3;3;3;3;3;2	3;3;3;3;3;2	0	37569000	0	Mitotic-spindle organizing protein 2A;Mitotic-spindle organizing protein 2B	MZT2B;MZT2A	;;;;;	6	3	3	3	1	3	1	1	3	1	1	3	1	34.4	34.4	34.4	12.395	122	122;140;218;158;158;121	1	30	0	4.879	10.7	34.4	10.7	358350000	20576000	48235000	12852000	0	0	1	18
H7C1N3;O15155;C9JTT8;Q68DU7;Q96EA0	H7C1N3;O15155;C9JTT8;Q68DU7;Q96EA0	2;2;1;1;1	2;2;1;1;1	2;2;1;1;1	99240000	128880000	90877000	BET1 homolog	BET1;DKFZp781C0425	;;;;	5	2	2	2	2	2	2	2	2	2	2	2	2	21.8	21.8	21.8	14.872	133	133;118;98;127;83	1	41	0	28.957	21.8	21.8	21.8	1444300000	129580000	155140000	67797000	4	3	3	32
H7C1U8;C9J574;Q9BUR5-2;Q9BUR5;G3V1B6	H7C1U8;C9J574;Q9BUR5-2;Q9BUR5;G3V1B6	4;4;4;4;2	4;4;4;4;2	4;4;4;4;2	86079000	81912000	101160000	Apolipoprotein O	APOO	;;;;	5	4	4	4	4	4	4	4	4	4	4	4	4	24.2	24.2	24.2	20.08	178	178;179;180;198;114	1	42	0	9.2131	24.2	24.2	24.2	1050000000	108690000	106790000	98371000	1	2	2	23
H7C286;E9PPU6;H0YF44;H0YC94	H7C286;E9PPU6	7;4;2;2	1;1;0;0	1;1;0;0	0	0	17802000		NAGK	;	4	7	1	1	7	7	5	1	1	1	1	1	1	48	8.7	8.7	21.977	196	196;94;109;136	1	14	0.0036058	2.2283	48	48	36.7	236520000	28942000	24504000	24803000	0	1	0	6
H7C2P7;A6NJD9;A8MVT4;A8MYK1;Q16540	H7C2P7;A6NJD9;A8MVT4;A8MYK1;Q16540	1;1;1;1;1	1;1;1;1;1	1;1;1;1;1	0	12768000	0	39S ribosomal protein L23, mitochondrial	MRPL23	;;;;	5	1	1	1	1	1	1	1	1	1	1	1	1	7.6	7.6	7.6	13.669	118	118;163;166;191;153	1	9	0.0040553	2.1492	7.6	7.6	7.6	65962000	16655000	14346000	0	1	1	1	8
H7C2Q8;Q99848	H7C2Q8;Q99848	4;4	4;4	4;4	31625000	62113000	53922000	Probable rRNA-processing protein EBP2	EBNA1BP2	;	2	4	4	4	3	4	2	3	4	2	3	4	2	14.7	14.7	14.7	40.684	361	361;306	1	34	0	8.2446	8.6	14.7	5.5	597650000	44422000	99292000	38713000	2	4	2	22
H7C2Y7;E7EPB4;E9PDF6;O43795-2;O43795	H7C2Y7;E7EPB4;E9PDF6;O43795-2;O43795	1;1;1;1;1	1;1;1;1;1	1;1;1;1;1	0	0	11085000	Unconventional myosin-Ib	MYO1B	;;;;	5	1	1	1	1	1	1	1	1	1	1	1	1	7.8	7.8	7.8	21.74	192	192;381;1107;1078;1136	1	12	0.0065451	1.9406	7.8	7.8	7.8	166100000	19757000	19026000	9859000	0	0	0	0
H7C389;Q8ND98;Q96MX6-2;Q96MX6	H7C389;Q8ND98;Q96MX6-2;Q96MX6	3;3;3;3	3;3;3;3	3;3;3;3	0	40694000	0	WD repeat-containing protein 92	WDR92;DKFZp434B156	;;;	4	3	3	3	2	2	2	2	2	2	2	2	2	34.8	34.8	34.8	10.392	92	92;187;288;357	1	31	0.00051138	2.9217	27.2	27.2	27.2	396040000	34673000	41390000	15429000	0	1	0	8
H7C5F7;H0Y8A7;Q9NV92	H7C5F7;H0Y8A7;Q9NV92	1;1;1	1;1;1	1;1;1	0	71121000	0	NEDD4 family-interacting protein 2	NDFIP2	;;	3	1	1	1	1	1	1	1	1	1	1	1	1	9	9	9	16.76	156	156;233;336	1	17	0.0010098	2.7691	9	9	9	628920000	13582000	66621000	17826000	0	1	0	5
H7C5G1;B4DMV3;Q2TAA2;C9JDY4;C9J5J2;C9JE02	H7C5G1;B4DMV3;Q2TAA2;C9JDY4;C9J5J2;C9JE02	3;3;3;2;2;2	3;3;3;2;2;2	3;3;3;2;2;2	0	0	4169500	Isoamyl acetate-hydrolyzing esterase 1 homolog	IAH1	;;;;;	6	3	3	3	1	1	1	1	1	1	1	1	1	20.6	20.6	20.6	25.085	228	228;135;248;47;74;160	1	12	0	5.4075	6.6	6.6	6.6	83838000	15922000	13581000	3708400	1	1	0	8
H7C5U3;H7C593;Q9H3U5-2;Q9H3U5-3;Q9H3U5;Q9H3U5-5;Q9H3U5-6	H7C5U3;H7C593;Q9H3U5-2;Q9H3U5-3;Q9H3U5;Q9H3U5-5;Q9H3U5-6	1;1;1;1;1;1;1	1;1;1;1;1;1;1	1;1;1;1;1;1;1	0	22481000	0	Major facilitator superfamily domain-containing protein 1	MFSD1	;;;;;;	7	1	1	1	1	1	0	1	1	0	1	1	0	18.8	18.8	18.8	6.8219	64	64;78;78;426;465;475;514	1	7	0.00050955	2.8955	18.8	18.8	0	112120000	22097000	25259000	0	1	1	0	6
H9KV44;Q14156-3;Q14156-2;Q14156	H9KV44;Q14156-3;Q14156-2;Q14156	2;2;2;2	2;2;2;2	2;2;2;2	0	0	14402000	Protein EFR3 homolog A	EFR3A	;;;	4	2	2	2	0	1	2	0	1	2	0	1	2	3.3	3.3	3.3	92.94	821	821;777;785;821	1	13	0.0080831	1.8243	0	1.6	3.3	102390000	0	6566600	12809000	0	1	0	3
H9KV75;H7C5W8;G3V2W4;H0YJW3;H0YJ11;G3V2X9;G3V2E8;B7Z4P8	H9KV75	50;18;16;13;11;9;5;2	1;0;1;0;0;1;1;0	1;0;1;0;0;1;1;0	9513500	0	0		ACTN1		8	50	1	1	46	46	44	1	0	0	1	0	0	73	1.2	1.2	94.825	822	822;297;238;251;207;144;85;388	1	7	1	-2	70	64	66.1	49433000	9910600	0	0	0	0	0	0
H9KV85;Q8N4C6-11;Q8N4C6-9;Q8N4C6-2;Q8N4C6;Q8N4C6-5;Q8N4C6-10;Q8N4C6-7;H0YDJ4;C9J066;Q8N4C6-4	H9KV85;Q8N4C6-11;Q8N4C6-9;Q8N4C6-2;Q8N4C6;Q8N4C6-5;Q8N4C6-10;Q8N4C6-7;H0YDJ4;C9J066;Q8N4C6-4	3;3;3;3;3;3;3;3;2;2;2	2;2;2;2;2;2;2;2;1;1;1	2;2;2;2;2;2;2;2;1;1;1	186090000	0	0	Ninein	NIN	;;;;;;;;;;	11	3	2	2	3	1	1	2	1	1	2	1	1	2.8	2.3	2.3	184.49	1581	1581;1377;2052;2073;2090;2096;2116;2133;1537;2046;2029	1	22	0.0069654	1.8932	2.8	0.9	0.9	2890700000	170990000	456120000	356270000	1	0	0	2
H9KVB8;F6XEV2;Q9BPX6;Q9BPX6-3;S4R3V1;S4R3D7;Q9BPX6-5;Q9BPX6-4;Q9BPX6-2	H9KVB8;F6XEV2;Q9BPX6;Q9BPX6-3;S4R3V1;S4R3D7;Q9BPX6-5;Q9BPX6-4;Q9BPX6-2	2;2;2;2;1;1;1;1;1	2;2;2;2;1;1;1;1;1	2;2;2;2;1;1;1;1;1	0	0	10207000	Calcium uptake protein 1, mitochondrial	MICU1	;;;;;;;;	9	2	2	2	0	1	1	0	1	1	0	1	1	5.7	5.7	5.7	54.308	476	476;478;476;478;212;212;278;278;403	1	11	0	5.2014	0	4	4	111210000	0	10002000	9078000	0	0	1	9
I1E4Y6;Q6Y7W6-4;Q6Y7W6-5;Q6Y7W6;Q6Y7W6-3;E9PC50;C9JHW1;E7ESB6;C9JH18;F8WCD5;C9JPV7;C9JXQ0;C9J0V6;C9JHT0;C9JRZ2;C9J7G1;B8ZZD2	I1E4Y6;Q6Y7W6-4;Q6Y7W6-5;Q6Y7W6;Q6Y7W6-3;E9PC50;C9JHW1;E7ESB6	15;15;15;15;14;10;8;8;2;1;1;1;1;1;1;1;1	15;15;15;15;14;10;8;8;2;1;1;1;1;1;1;1;1	15;15;15;15;14;10;8;8;2;1;1;1;1;1;1;1;1	204490000	207000000	215230000	PERQ amino acid-rich with GYF domain-containing protein 2	GIGYF2	;;;;;;;	17	15	15	15	12	13	11	12	13	11	12	13	11	16.1	16.1	16.1	152.53	1321	1321;1286;1293;1299;1320;872;720;836;149;92;93;99;106;112;115;143;176	1	190	0	33.715	12	13.9	11.2	2897200000	258790000	306880000	202830000	4	3	7	62
I3L0N3;P46459;B4DFA2;I3L2G1;K7EQD6;I3L0L3;I3L338;I3L4Q9	I3L0N3;P46459;B4DFA2	27;27;25;7;6;5;2;2	27;27;25;7;6;5;2;2	27;27;25;7;6;5;2;2	494620000	480620000	395080000	Vesicle-fusing ATPase	NSF	;;	8	27	27	27	15	17	21	15	17	21	15	17	21	40.9	40.9	40.9	82.091	739	739;744;644;136;180;161;44;81	1	226	0	62.205	24	25.8	31.1	5299100000	506800000	556210000	351810000	7	7	7	79
I3L0U2;Q9Y6M0-3;Q9Y6M0-2;Q9Y6M0;I3L3C7	I3L0U2;Q9Y6M0-3;Q9Y6M0-2;Q9Y6M0;I3L3C7	4;4;4;4;3	4;4;4;4;3	4;4;4;4;3	0	91905000	79423000	Testisin	PRSS21	;;;;	5	4	4	4	1	2	3	1	2	3	1	2	3	20.2	20.2	20.2	24.706	218	218;300;312;314;256	1	36	0	7.3993	5	11	16.1	894660000	29705000	87718000	80950000	1	1	0	12
I3L0X5;O75391;I3L4C3	I3L0X5;O75391;I3L4C3	3;3;2	3;3;2	3;3;2	0	0	41808000	Sperm-associated antigen 7	SPAG7	;;	3	3	3	3	2	1	2	2	1	2	2	1	2	24.4	24.4	24.4	20.083	176	176;227;194	1	21	0	4.8787	13.1	7.4	13.1	289230000	15253000	15987000	37184000	0	1	0	4
I3L1D4;B0QYY7;S4R469;F8VR27;F8VZY7;B0QYV1;B0QYY4;J3KNW3;B7Z1U7;F8VZG9;O43251-9;Q9NWB1-3;O43251-4;O43251-5;O43251-10;O43251-2;O43251;Q9NWB1-4;Q9NWB1-5;Q9NWB1;O43251-7;Q9NWB1-2;O43251-6;O43251-8;B0QYY6;S4R3K7;J3QQZ2;J3QRF4;F8VRS4;A6NFN3;B4DF29;O43251-3	I3L1D4;B0QYY7;S4R469;F8VR27;F8VZY7;B0QYV1;B0QYY4;J3KNW3;B7Z1U7;F8VZG9;O43251-9;Q9NWB1-3;O43251-4;O43251-5;O43251-10;O43251-2;O43251;Q9NWB1-4;Q9NWB1-5;Q9NWB1;O43251-7;Q9NWB1-2;O43251-6;O43251-8;B0QYY6;S4R3K7;J3QQZ2;J3QRF4;F8VRS4;A6NFN3;B4DF29;O43251-3	2;2;2;2;2;2;2;2;2;2;2;2;2;2;2;2;2;2;2;2;2;2;2;2;1;1;1;1;1;1;1;1	2;2;2;2;2;2;2;2;2;2;2;2;2;2;2;2;2;2;2;2;2;2;2;2;1;1;1;1;1;1;1;1	2;2;2;2;2;2;2;2;2;2;2;2;2;2;2;2;2;2;2;2;2;2;2;2;1;1;1;1;1;1;1;1	19413000	0	0	RNA binding protein fox-1 homolog;RNA binding protein fox-1 homolog 2;RNA binding protein fox-1 homolog 1;RNA binding protein fox-1 homolog 3	RBFOX1;RBFOX2;RBFOX3	;;;;;;;;;;;;;;;;;;;;;;;;;;;;;;;	32	2	2	2	2	1	1	2	1	1	2	1	1	12.7	12.7	12.7	20.66	189	189;200;234;262;263;357;370;402;425;466;367;370;370;376;380;381;390;392;395;397;400;418;450;451;128;230;328;358;391;312;325;358	1	20	0.0051753	1.9965	12.7	7.9	7.9	213860000	16484000	11232000	8923800	0	0	1	11
I3L1G1;I3NI44;B4DUW5;J3KQU4;I3L4I4;Q8N749;B7Z9E2;O75674	I3L1G1;I3NI44;B4DUW5;J3KQU4;I3L4I4;Q8N749;B7Z9E2;O75674	1;1;1;1;1;1;1;1	1;1;1;1;1;1;1;1	1;1;1;1;1;1;1;1	0	0	23280000	TOM1-like protein 1	TOM1L1	;;;;;;;	8	1	1	1	0	1	1	0	1	1	0	1	1	9.5	9.5	9.5	28.125	252	252;326;364;465;469;346;399;476	1	6	0.0017491	2.6445	0	9.5	9.5	99668000	0	19680000	20705000	0	1	0	1
I3L1P8;Q02978;Q02978-2	I3L1P8;Q02978;Q02978-2	11;11;8	11;11;8	11;11;8	361540000	372140000	347180000	Mitochondrial 2-oxoglutarate/malate carrier protein	SLC25A11	;;	3	11	11	11	6	8	7	6	8	7	6	8	7	46.6	46.6	46.6	32.182	296	296;314;263	1	116	0	62.778	29.4	35.8	33.1	4955400000	340920000	426060000	279200000	4	4	3	74
I3L1R7;Q99447;Q99447-3;I3L3V9;I3L2Q1;I3L1L9;Q99447-2;Q99447-4;I3L102	I3L1R7;Q99447;Q99447-3;I3L3V9;I3L2Q1;I3L1L9;Q99447-2;Q99447-4	4;4;4;3;3;3;3;3;1	4;4;4;3;3;3;3;3;1	4;4;4;3;3;3;3;3;1	41494000	45592000	44291000	Ethanolamine-phosphate cytidylyltransferase	PCYT2	;;;;;;;	9	4	4	4	3	3	3	3	3	3	3	3	3	12.5	12.5	12.5	41.395	367	367;389;407;207;286;314;311;357;44	1	36	0	7.5587	8.4	10.4	8.7	504820000	47216000	53535000	38430000	0	2	3	14
I3L1Y9;Q96CP2	I3L1Y9;Q96CP2	1;1	1;1	1;1	0	0	9691900	FLYWCH family member 2	FLYWCH2	;	2	1	1	1	1	1	1	1	1	1	1	1	1	8.3	8.3	8.3	15.604	144	144;140	1	12	0.008494	1.7611	8.3	8.3	8.3	130050000	7891100	12236000	8620100	1	1	1	5
I3L2C7;P57678;I3L399;E7EN12;I3L4M4;I3L4A4	I3L2C7;P57678	12;12;2;1;1;1	12;12;2;1;1;1	12;12;2;1;1;1	98246000	80111000	65029000	Gem-associated protein 4	GEMIN4	;	6	12	12	12	10	6	5	10	6	5	10	6	5	15.1	15.1	15.1	118.82	1047	1047;1058;296;184;189;271	1	81	0	13.813	13	8.1	6.5	1065300000	117350000	108840000	69887000	6	2	1	30
I3L2X1;Q9BYC9;B7Z746	I3L2X1;Q9BYC9;B7Z746	1;1;1	1;1;1	1;1;1	0	0	43198000	39S ribosomal protein L20, mitochondrial	MRPL20	;;	3	1	1	1	1	1	1	1	1	1	1	1	1	16.7	16.7	16.7	7.5961	66	66;149;155	1	20	0.004066	2.1934	16.7	16.7	16.7	480990000	18352000	24532000	38712000	0	0	2	10
I3L3C4;I3L3U9;J3QSV6;O76021;I3L234	I3L3C4;I3L3U9;J3QSV6;O76021;I3L234	3;3;3;3;2	3;3;3;3;2	3;3;3;3;2	43311000	0	0	Ribosomal L1 domain-containing protein 1	RSL1D1	;;;;	5	3	3	3	3	2	3	3	2	3	3	2	3	20.9	20.9	20.9	18.535	158	158;296;430;490;98	1	25	0.00026759	3.5346	20.9	15.8	20.9	468660000	54975000	57915000	56123000	1	1	0	8
I3L3V4;I3L4Z6;I3L0K1;E7EQ34;O14653;O14653-2;I3NI02;I3L1K7;O14653-3	I3L3V4;I3L4Z6;I3L0K1;E7EQ34;O14653;O14653-2;I3NI02;I3L1K7;O14653-3	2;2;2;2;2;2;1;1;1	2;2;2;2;2;2;1;1;1	2;2;2;2;2;2;1;1;1	20391000	17576000	17228000	Golgi SNAP receptor complex member 2	GOSR2	;;;;;;;;	9	2	2	2	1	2	1	1	2	1	1	2	1	18.1	18.1	18.1	17.794	149	149;165;199;232;212;213;98;143;195	1	19	0	6.8955	10.7	18.1	10.7	143150000	22530000	18659000	16217000	1	3	0	9
I3L3Z2;I3L4V0;Q9BRA0;Q9BRA0-2	I3L3Z2;I3L4V0;Q9BRA0;Q9BRA0-2	1;1;1;1	1;1;1;1	1;1;1;1	0	19519000	0	N-alpha-acetyltransferase 38, NatC auxiliary subunit	NAA38	;;;	4	1	1	1	1	1	0	1	1	0	1	1	0	22.9	22.9	22.9	8.9492	83	83;99;125;173	1	9	0.00075815	2.7903	22.9	22.9	0	124780000	15472000	21931000	0	0	1	0	2
I3L443;Q9HC36	I3L443;Q9HC36	1;1	1;1	1;1	0	0	10639000	rRNA methyltransferase 3, mitochondrial	RNMTL1	;	2	1	1	1	0	1	1	0	1	1	0	1	1	9.6	9.6	9.6	19.584	177	177;420	1	5	0	4.1338	0	9.6	9.6	81688000	0	17430000	9462700	0	0	0	1
I3L4N6;Q9UP95-5;Q9UP95-2;Q9UP95-6;Q9UP95;Q9UP95-7;Q9UP95-3;Q9UP95-4;B3KXX3;Q9UHW9-6;Q9UHW9-5;Q9UHW9-2;Q9H2X9-2;Q9UHW9-3;Q9H2X9;Q9UHW9-4;Q9UHW9;H0YMQ9;H0YKQ8	I3L4N6;Q9UP95-5;Q9UP95-2;Q9UP95-6;Q9UP95;Q9UP95-7;Q9UP95-3;Q9UP95-4	7;7;7;7;7;7;6;4;3;3;3;3;3;3;3;3;3;2;2	7;7;7;7;7;7;6;4;3;3;3;3;3;3;3;3;3;2;2	7;7;7;7;7;7;6;4;3;3;3;3;3;3;3;3;3;2;2	27349000	27925000	0	Solute carrier family 12 member 4	SLC12A4	;;;;;;;	19	7	7	7	4	4	2	4	4	2	4	4	2	7.3	7.3	7.3	115.05	1037	1037;1054;1068;1079;1085;1087;1011;780;962;1084;1091;1099;1116;1135;1139;1141;1150;906;942	1	33	0	9.1105	4.6	4.7	2.2	333640000	39792000	48398000	64114000	3	1	1	20
I3L533;I3L2R9;Q9NXR1-2;Q9NXR1;I3L2R3;I3L2T8;I3L522;J3QSD2;J3QRZ1;A6NIZ0;Q9GZM8-3;Q9GZM8;Q9GZM8-2	I3L533;I3L2R9;Q9NXR1-2;Q9NXR1;I3L2R3;I3L2T8;I3L522	3;3;3;3;2;2;2;1;1;1;1;1;1	3;3;3;3;2;2;2;1;1;1;1;1;1	3;3;3;3;2;2;2;1;1;1;1;1;1	0	0	21659000	Nuclear distribution protein nudE homolog 1	NDE1	;;;;;;	13	3	3	3	1	1	2	1	1	2	1	1	2	26.8	26.8	26.8	15.744	153	153;173;335;346;137;139;192;194;196;269;328;345;367	1	17	0	7.1072	6.5	12.4	20.3	168050000	0	13841000	19208000	1	0	2	12
J3KMX1;Q99567;I3L245	J3KMX1;Q99567	7;7;3	7;7;3	7;7;3	138340000	101010000	69305000	Nuclear pore complex protein Nup88	NUP88	;	3	7	7	7	5	5	7	5	5	7	5	5	7	16.1	16.1	16.1	78.77	696	696;741;153	1	60	0	17.226	10.1	11.9	16.1	985210000	118390000	100170000	95336000	1	2	3	16
J3KMX2;Q92925-3;Q92925-2;Q92925;J3QWB6;F8VW95;F8VZ70;F8VUB0;Q6STE5	J3KMX2;Q92925-3;Q92925-2;Q92925;J3QWB6	4;4;4;4;2;1;1;1;1	4;4;4;4;2;1;1;1;1	3;3;3;3;2;0;0;0;0	24717000	28856000	37988000	SWI/SNF-related matrix-associated actin-dependent regulator of chromatin subfamily D member 2	SMARCD2	;;;;	9	4	4	3	4	2	3	4	2	3	3	1	2	15.8	15.8	12.1	52.238	456	456;483;510;531;231;113;278;289;483	1	31	0	9.9725	15.8	8.1	13.6	375350000	28841000	48612000	50401000	1	1	1	15
J3KMY5;H0YIZ1;G3V3E8;E7EMS2;G3V3D1;P61916;G3V2V8;B4DQV7	J3KMY5;H0YIZ1;G3V3E8;E7EMS2;G3V3D1;P61916;G3V2V8;B4DQV7	5;5;5;5;5;5;4;4	5;5;5;5;5;5;4;4	5;5;5;5;5;5;4;4	312490000	274750000	273680000	Epididymal secretory protein E1	NPC2	;;;;;;;	8	5	5	5	4	5	4	4	5	4	4	5	4	43.2	43.2	43.2	16.23	148	148;173;174;201;221;151;122;125	1	86	0	59.045	37.2	43.2	38.5	4397700000	241870000	300890000	231260000	3	6	5	54
J3KMZ9;P01130-3;P01130-4;P01130;P01130-2;P01130-6	J3KMZ9;P01130-3;P01130-4;P01130;P01130-2;P01130-6	13;13;13;13;12;12	13;13;13;13;12;12	1;1;1;1;1;1	510230000	473320000	416870000	Low-density lipoprotein receptor	LDLR	;;;;;	6	13	13	1	12	13	8	12	13	8	1	1	1	18.2	18.2	2.1	104.56	945	945;692;819;860;682;739	1	169	0	63.355	16.8	18.2	11.9	5659100000	500470000	579720000	312430000	7	7	5	85
J3KN16;Q5VYK3;R4GMY1;Q5VYK5;F6XAQ5;R4GMY3	J3KN16;Q5VYK3	39;39;17;5;5;2	39;39;17;5;5;2	39;39;17;5;5;2	732380000	724010000	760560000	Proteasome-associated protein ECM29 homolog	KIAA0368;ECM29	;	6	39	39	39	26	29	29	26	29	29	26	29	29	26.8	26.8	26.8	223.69	2017	2017;1845;890;129;142;128	1	347	0	114.94	16.5	20.4	19.2	8317300000	744810000	849960000	837790000	12	17	16	154
J3KN36;Q5JPE7-2;P69849;Q5JPE7;F5H826;Q5JPE7-3;H3BPS9;I3L0Q6;H3BTW1;I3L1G6	J3KN36;Q5JPE7-2;P69849;Q5JPE7;F5H826;Q5JPE7-3	37;37;37;37;33;33;5;2;2;1	37;37;37;37;33;33;5;2;2;1	3;3;3;3;3;3;1;0;0;1	1296500000	1329700000	1367800000	Nodal modulator 2;Nodal modulator 3	NOMO3;NOMO2	;;;;;	10	37	37	3	29	29	25	29	29	25	1	2	2	41.4	41.4	3.1	139.38	1267	1267;1222;1222;1267;1100;1100;223;138;138;95	1	445	0	236.24	33.5	30.4	28.3	16301000000	1379000000	1602900000	1112800000	22	28	21	288
J3KN66;Q5JTV8;H0Y4R4;Q5JTV8-2;H0YD16;H0YDU3	J3KN66;Q5JTV8;H0Y4R4	14;13;8;5;4;3	14;13;8;5;4;3	13;12;7;4;4;3	518920000	608070000	553370000	Torsin-1A-interacting protein 1	TOR1AIP1	;;	6	14	14	13	13	12	11	13	12	11	12	11	10	30.9	30.9	29.2	67.821	599	599;583;296;378;198;193	1	165	0	109.41	28.5	26	24.4	6796800000	599080000	715580000	423240000	9	9	8	94
J3KN67;H0YLS7;D6RGJ6	J3KN67	22;1;1	1;1;1	0;0;0	589490000	577690000	490970000		TPM3		3	22	1	0	20	19	21	1	1	1	0	0	0	53.3	3.2	0	33.222	285	285;40;75	1	33	1	-2	48.4	48.4	50.9	6580300000	601080000	691900000	431290000	1	1	2	12
J3KN69;Q6PIU2;Q6PIU2-2;H7C046;Q6PIU2-3;F8WE33	J3KN69;Q6PIU2;Q6PIU2-2;H7C046;Q6PIU2-3	8;8;8;6;5;1	8;8;8;6;5;1	8;8;8;6;5;1	342720000	326800000	343560000	Neutral cholesterol ester hydrolase 1	NCEH1	;;;;	6	8	8	8	7	7	6	7	7	6	7	7	6	24.8	24.8	24.8	49.062	440	440;408;416;307;275;93	1	110	0	55.573	23.2	22.7	19.5	4091200000	316220000	377960000	287620000	4	7	3	68
J3KN82;Q96GX9;S4R3D6;Q96GX9-3	J3KN82;Q96GX9;S4R3D6;Q96GX9-3	4;4;3;3	4;4;3;3	4;4;3;3	118450000	98579000	100770000	Methylthioribulose-1-phosphate dehydratase	APIP	;;;	4	4	4	4	3	4	4	3	4	4	3	4	4	20.8	20.8	20.8	29.3	259	259;242;195;204	1	54	0	23.887	14.3	20.8	20.8	1277700000	127800000	78705000	110910000	3	4	5	38
J3KNC0;P52655	J3KNC0;P52655	2;2	2;2	2;2	0	0	33411000	Transcription initiation factor IIA subunit 1;Transcription initiation factor IIA alpha chain;Transcription initiation factor IIA beta chain	GTF2A1	;	2	2	2	2	1	1	2	1	1	2	1	1	2	47.5	47.5	47.5	6.7407	59	59;376	1	17	0	11.398	18.6	28.8	47.5	335850000	22156000	15267000	29300000	0	1	1	11
J3KNF4;O14618;E9PP76;E9PK03	J3KNF4;O14618;E9PP76	3;3;2;1	3;3;2;1	3;3;2;1	24998000	32415000	31020000	Copper chaperone for superoxide dismutase;Superoxide dismutase [Cu-Zn]	CCS	;;	4	3	3	3	2	3	2	2	3	2	2	3	2	9	9	9	27.086	255	255;274;68;249	1	25	0.0026882	2.419	6.3	9	5.9	309190000	24972000	39665000	42103000	0	2	0	8
J3KNF8;J3QR91	J3KNF8	5;1	5;1	1;0	1458100000	1784300000	2106700000		CYB5B		2	5	5	1	5	5	5	5	5	5	1	1	1	59.3	59.3	10	16.694	150	150;64	1	125	0	133.12	59.3	59.3	59.3	21668000000	1597500000	2004000000	1823600000	9	8	12	116
J3KNH7;Q9H4L4	J3KNH7;Q9H4L4	1;1	1;1	1;1	0	0	7359500	Sentrin-specific protease 3	SENP3	;	2	1	1	1	1	1	1	1	1	1	1	1	1	2.4	2.4	2.4	64.881	573	573;574	1	7	0.0065497	1.9549	2.4	2.4	2.4	44672000	6570400	7413900	6545700	0	0	0	0
J3KNI1;Q9H9E3-3;Q9H9E3;Q9H9E3-2	J3KNI1;Q9H9E3-3;Q9H9E3;Q9H9E3-2	2;2;2;1	2;2;2;1	2;2;2;1	0	17592000	0	Conserved oligomeric Golgi complex subunit 4	COG4	;;;	4	2	2	2	1	2	1	1	2	1	1	2	1	3.8	3.8	3.8	89.5	789	789;712;785;337	1	16	0.0065375	1.9381	1.6	3.8	1.6	104250000	5915600	19766000	6603300	0	1	0	3
J3KNK0;Q8TDC3;Q8TDC3-2	J3KNK0;Q8TDC3;Q8TDC3-2	1;1;1	1;1;1	1;1;1	0	0	41528000	Serine/threonine-protein kinase BRSK1	BRSK1	;;	3	1	1	1	1	1	1	1	1	1	1	1	1	1.5	1.5	1.5	50.736	473	473;778;794	1	19	0.0042725	2.0939	1.5	1.5	1.5	1158500000	63967000	67709000	43892000	1	1	0	11
J3KNK4;Q9Y587;G3V4P7;G3V5J6;G3V3X7;Q9Y587-3;Q9Y587-4;Q9Y587-2	J3KNK4;Q9Y587;G3V4P7;G3V5J6;G3V3X7;Q9Y587-3;Q9Y587-4;Q9Y587-2	2;2;1;1;1;1;1;1	2;2;1;1;1;1;1;1	2;2;1;1;1;1;1;1	0	0	28709000	AP-4 complex subunit sigma-1	AP4S1	;;;;;;;	8	2	2	2	2	1	2	2	1	2	2	1	2	13.2	13.2	13.2	16.982	144	144;144;98;102;133;135;149;159	1	22	0.0022316	2.5835	13.2	6.9	13.2	321400000	29112000	6440000	25534000	0	0	0	1
J3KNK7;H3BND4;E7EMH5;E7EPL4;H3BNZ1;Q6P996;Q86XE2;Q6P996-2;H3BNL6;Q6P474	J3KNK7;H3BND4;E7EMH5;E7EPL4;H3BNZ1;Q6P996	18;18;18;18;18;18;6;5;2;2	18;18;18;18;18;18;6;5;2;2	18;18;18;18;18;18;6;5;2;2	506840000	469600000	407550000	Pyridoxal-dependent decarboxylase domain-containing protein 1	PDXDC1	;;;;;	10	18	18	18	15	15	11	15	15	11	15	15	11	35.4	35.4	35.4	85.12	773	773;806;697;760;761;788;498;429;271;469	1	196	0	64.331	27.9	27	21.9	5313700000	428470000	533810000	278790000	5	10	5	84
J3KNL6;O15027;O15027-5;O15027-2;O15027-4;O15027-3;X6RGP5;Q8N9G1	J3KNL6;O15027;O15027-5;O15027-2;O15027-4;O15027-3;X6RGP5	30;27;27;26;26;26;17;3	30;27;27;26;26;26;17;3	30;27;27;26;26;26;17;3	545030000	579930000	537540000	Protein transport protein Sec16A	SEC16A	;;;;;;	8	30	30	30	17	22	21	17	22	21	17	22	21	21.6	21.6	21.6	251.89	2357	2357;2179;2201;2134;2154;2159;1059;385	1	263	0	56.883	11.7	15.7	14.3	6507800000	408930000	594070000	486370000	8	9	6	109
J3KNQ4;Q9NVD7;F5H1R9;B7Z952;E9PS97;Q9NVD7-2	J3KNQ4;Q9NVD7;F5H1R9;B7Z952;E9PS97	9;9;8;6;5;2	9;9;8;6;5;2	7;7;6;5;5;2	258030000	268980000	275650000	Alpha-parvin	PARVA	;;;;	6	9	9	7	7	7	6	7	7	6	5	5	4	27.7	27.7	22.6	46.589	412	412;372;372;290;209;182	1	107	0	55.23	19.4	19.4	16	3273900000	269030000	305850000	210890000	5	4	5	63
J3KNW4;Q14192	J3KNW4;Q14192	9;9	9;9	9;9	337250000	204240000	238740000	Four and a half LIM domains protein 2	FHL2	;	2	9	9	9	7	8	8	7	8	8	7	8	8	26.5	26.5	26.5	44.205	389	389;279	1	100	0	21.513	21.9	24.7	24.2	2793800000	249800000	230650000	241560000	6	5	5	55
J3KNX9;Q92614-2;Q92614-3;Q92614-4;Q92614;Q92614-5;H0YEV9	J3KNX9;Q92614-2;Q92614-3;Q92614-4;Q92614;Q92614-5	10;10;10;10;10;8;2	10;10;10;10;10;8;2	10;10;10;10;10;8;2	73164000	56633000	0	Unconventional myosin-XVIIIa	MYO18A	;;;;;	7	10	10	10	8	8	4	8	8	4	8	8	4	6.5	6.5	6.5	233.14	2054	2054;1723;2002;2039;2054;1581;197	1	65	0	15.719	5.5	5.2	3	711300000	77507000	155710000	48781000	2	1	0	12
J3KP15;Q01130;J3QL05;B4DN89;Q9BRL6-2;Q9BRL6	J3KP15;Q01130;J3QL05;B4DN89	7;7;6;6;2;2	7;7;6;6;2;2	7;7;6;6;2;2	1471300000	1650300000	1580000000	Serine/arginine-rich splicing factor 2	SRSF2	;;;	6	7	7	7	7	7	7	7	7	7	7	7	7	55.6	55.6	55.6	15.371	133	133;221;130;209;275;282	1	138	0	210.16	55.6	55.6	55.6	19354000000	1602300000	1854400000	1470200000	6	6	7	90
J3KPN1;Q96BS2;Q96BS2-3;Q96BS2-2;E9PQ58;H0YIX4	J3KPN1;Q96BS2;Q96BS2-3;Q96BS2-2	7;7;6;5;3;1	7;7;6;5;3;1	7;7;6;5;3;1	228300000	213290000	247330000	Calcineurin B homologous protein 3	TESC	;;;	6	7	7	7	5	4	6	5	4	6	5	4	6	30	30	30	30.289	267	267;214;187;163;135;81	1	76	0	24.602	21.3	15.4	27.3	2491500000	251490000	164840000	211330000	5	3	6	44
J3KPP4;O95232;B4DJ96;D6RDI2;C9JL41;O95232-2;E7EN55;H0YA81;D6RHH0;H7C5U7;U3KQT3;H0YBV7;H0YAR4	J3KPP4;O95232;B4DJ96;D6RDI2	14;14;10;7;3;3;2;2;1;1;1;1;1	14;14;10;7;3;3;2;2;1;1;1;1;1	14;14;10;7;3;3;2;2;1;1;1;1;1	295090000	315820000	315370000	Luc7-like protein 3	LUC7L3	;;;	13	14	14	14	9	9	8	9	9	8	9	9	8	31.7	31.7	31.7	58.22	489	489;432;356;184;79;79;54;207;36;39;46;118;123	1	129	0	111.23	21.3	21.7	18.4	3847500000	351500000	368920000	223420000	6	6	2	62
J3KPS0;Q9NXW2;Q9NXW2-2;V9GYN7	J3KPS0;Q9NXW2;Q9NXW2-2	4;4;4;1	4;4;4;1	4;4;4;1	0	49365000	58081000	DnaJ homolog subfamily B member 12	DNAJB12	;;	4	4	4	4	2	3	3	2	3	3	2	3	3	13.9	13.9	13.9	45.489	409	409;375;377;276	1	36	0	5.289	4.9	11.7	11.7	600350000	43125000	61956000	45268000	0	0	0	4
J3KPT4;Q9H4I3;Q9H4I3-2	J3KPT4;Q9H4I3;Q9H4I3-2	4;4;2	4;4;2	4;4;2	37975000	50113000	0	TraB domain-containing protein	TRABD	;;	3	4	4	4	2	3	1	2	3	1	2	3	1	16.4	16.4	16.4	42.692	379	379;376;330	1	20	0	4.2046	9	14	3.2	393630000	32287000	57397000	18703000	1	2	0	7
J3KPX7;Q99623;F5GY37;Q99623-2;F5GWA7;F5H3X6;F5H0C5;F5H2D2;U3KPZ5	J3KPX7;Q99623;F5GY37;Q99623-2;F5GWA7;F5H3X6	16;16;14;13;10;8;4;3;3	16;16;14;13;10;8;4;3;3	16;16;14;13;10;8;4;3;3	3140500000	3543300000	3562500000	Prohibitin-2	PHB2	;;;;;	9	16	16	16	15	16	16	15	16	16	15	16	16	59.9	59.9	59.9	33.402	299	299;299;267;261;261;213;112;87;103	1	244	0	323.31	57.5	59.9	59.9	43872000000	3690000000	4294600000	3264000000	12	19	15	179
J3KQ32;Q9NTK5;Q9NTK5-3;Q9NTK5-2;C9JTK6;C9JCJ9	J3KQ32;Q9NTK5;Q9NTK5-3;Q9NTK5-2	24;24;16;14;7;6	24;24;16;14;7;6	24;24;16;14;7;6	1864100000	1789300000	1678100000	Obg-like ATPase 1	OLA1	;;;	6	24	24	24	18	20	18	18	20	18	18	20	18	65.6	65.6	65.6	46.937	416	416;396;278;238;116;103	1	295	0	69.965	54.8	58.4	51.9	20547000000	1586900000	2294200000	1223100000	12	16	9	158
J3KQ34;Q9H9Q2;J3QT73;Q9H9Q2-2;J3KQ41;Q9H9Q2-3	J3KQ34;Q9H9Q2;J3QT73;Q9H9Q2-2	3;3;2;2;1;1	3;3;2;2;1;1	3;3;2;2;1;1	34242000	47758000	43175000	COP9 signalosome complex subunit 7b	COPS7B	;;;	6	3	3	3	2	3	2	2	3	2	2	3	2	18.7	18.7	18.7	26.424	230	230;264;172;157;278;273	1	25	0	15.383	11.3	18.7	13	497490000	38601000	66945000	34217000	1	2	1	13
J3KQ48;Q9Y3E5	J3KQ48;Q9Y3E5	5;5	5;5	5;5	198580000	244610000	237880000	Peptidyl-tRNA hydrolase 2, mitochondrial	PTRH2	;	2	5	5	5	5	5	5	5	5	5	5	5	5	47.2	47.2	47.2	19.325	180	180;179	1	92	0	57.381	47.2	47.2	47.2	2799000000	217130000	288250000	211570000	3	4	5	57
J3KQ73;Q14318;U3KQ64;Q14318-3;U3KQI1;M0R1Q0;M0R1S6	J3KQ73;Q14318;U3KQ64	10;9;5;4;2;1;1	10;9;5;4;2;1;1	1;0;0;0;0;0;0	306580000	301030000	329610000	Peptidyl-prolyl cis-trans isomerase FKBP8	FKBP8	;;	7	10	10	1	7	6	7	7	6	7	0	0	0	27.4	27.4	1.6	47.143	441	441;412;182;253;103;163;167	1	107	0	78.391	18.4	15.9	18.4	3898000000	286800000	240320000	296500000	6	4	6	60
J3KQJ1;Q8NBJ7;C9JL30;A8MXB9;C9J660;Q8NBJ7-2;E9PBT8;H7C3B2;F8WA42;Q8NBJ7-3;J3QT17;Q8NBJ7-5;F8WEX5;E9PG02;F8WEV7;F8WES7;Q8NBJ7-4	J3KQJ1;Q8NBJ7;C9JL30;A8MXB9;C9J660;Q8NBJ7-2;E9PBT8;H7C3B2;F8WA42;Q8NBJ7-3;J3QT17;Q8NBJ7-5	6;6;5;5;5;5;4;4;4;4;3;3;2;2;1;1;1	6;6;5;5;5;5;4;4;4;4;3;3;2;2;1;1;1	6;6;5;5;5;5;4;4;4;4;3;3;2;2;1;1;1	275770000	246900000	235830000	Sulfatase-modifying factor 2	SUMF2	;;;;;;;;;;;	17	6	6	6	6	6	5	6	6	5	6	6	5	20	20	20	35.922	320	320;301;293;305;352;213;232;304;358;339;236;217;165;183;102;150;321	1	80	0	34.508	20	20	19.7	2914200000	343850000	328610000	208180000	5	3	2	40
J3KQN4;P83881;H7BZ11;H0Y5B4;H7BY91;H0Y3V9	J3KQN4;P83881;H7BZ11;H0Y5B4	7;7;6;6;3;3	2;2;2;2;2;2	2;2;2;2;2;2	0	0	131860000	60S ribosomal protein L36a	RPL36A;RPL36A-HNRNPH2	;;;	6	7	2	2	6	4	6	1	1	2	1	1	2	31	7	7	16.378	142	142;106;129;131;80;88	1	10	0.0031356	2.2692	29.6	23.9	24.6	355110000	7768700	87150000	117280000	0	1	0	4
J3KQS6;Q9NWV8;M0QX07;M0R3F4;M0R2A4;M0R2K3;M0R193;M0R0I0;M0R2I2;M0QY17;Q9NWV8-3;M0QXG9;Q9NWV8-2	J3KQS6;Q9NWV8;M0QX07;M0R3F4;M0R2A4;M0R2K3;M0R193;M0R0I0;M0R2I2	5;5;4;3;3;3;3;3;3;2;2;1;1	5;5;4;3;3;3;3;3;3;2;2;1;1	5;5;4;3;3;3;3;3;3;2;2;1;1	81919000	70358000	56399000	BRISC and BRCA1-A complex member 1	BABAM1	;;;;;;;;	13	5	5	5	3	4	4	3	4	4	3	4	4	23.7	23.7	23.7	36.426	329	329;329;254;181;193;200;218;225;237;108;171;184;184	1	52	0	20.847	9.4	16.4	16.4	820260000	66474000	61871000	48018000	3	3	1	23
J3KQU9;B3KXW5;O43747;O43747-2;H3BNR4;H3BR36;H3BUN9;H3BRM7;H3BN71;B4DGE1;B3KNW1;H3BN75;H3BS13;H3BV30	J3KQU9;B3KXW5;O43747;O43747-2	17;17;17;17;7;5;5;3;3;3;2;1;1;1	17;17;17;17;7;5;5;3;3;3;2;1;1;1	17;17;17;17;7;5;5;3;3;3;2;1;1;1	551590000	499080000	487980000	AP-1 complex subunit gamma-1	AP1G1	;;;	14	17	17	17	14	16	15	14	16	15	14	16	15	27.8	27.8	27.8	91.695	825	825;845;822;825;236;187;208;139;144;176;247;53;85;91	1	234	0	115.47	22.3	24.8	24.7	6243700000	553740000	537540000	455380000	10	10	10	126
J3KR97;Q9BTW9;Q9BTW9-4;Q9BTW9-5;I3L439;I3L163;C9J1U4;I3L4D2;I3L3H4;I3L131;I3L143;I3L0V3;I3L500;Q9BTW9-3;I3L1S3;I3L120	J3KR97;Q9BTW9;Q9BTW9-4;Q9BTW9-5	14;14;14;8;5;4;4;3;3;3;3;3;3;3;2;2	14;14;14;8;5;4;4;3;3;3;3;3;3;3;2;2	14;14;14;8;5;4;4;3;3;3;3;3;3;3;2;2	169210000	144770000	157460000	Tubulin-specific chaperone D	TBCD	;;;	16	14	14	14	12	9	9	12	9	9	12	9	9	15.6	15.6	15.6	136.55	1230	1230;1192;1248;757;256;244;311;109;134;141;211;237;251;151;117;260	1	124	0	38.056	13	9.2	9.4	1962700000	229200000	152260000	132400000	6	4	4	48
J3KS15;Q14197	J3KS15;Q14197	3;3	3;3	3;3	63323000	69700000	77261000	Peptidyl-tRNA hydrolase ICT1, mitochondrial	ICT1	;	2	3	3	3	3	3	2	3	3	2	3	3	2	18.2	18.2	18.2	21.905	192	192;206	1	34	0	15.391	18.2	18.2	12.5	881820000	69265000	56035000	50343000	1	2	1	16
J3KSN0;J3QQU6;J3QKK2;J3KTR4;Q8WVN6	J3KSN0;J3QQU6;J3QKK2;J3KTR4;Q8WVN6	1;1;1;1;1	1;1;1;1;1	1;1;1;1;1	0	0	31663000	Secreted and transmembrane protein 1	SECTM1	;;;;	5	1	1	1	1	1	1	1	1	1	1	1	1	13	13	13	15.845	146	146;149;170;178;248	1	8	0	3.8748	13	13	13	134800000	29533000	18047000	28162000	1	0	1	3
J3KSY6;Q8TCD5;J3KSX6;J3KRC4;J3KSF0;J3QQX8;Q8TCD5-2	J3KSY6;Q8TCD5;J3KSX6;J3KRC4	3;3;2;2;1;1;1	3;3;2;2;1;1;1	3;3;2;2;1;1;1	67636000	69107000	0	5(3)-deoxyribonucleotidase, cytosolic type	NT5C	;;;	7	3	3	3	3	3	1	3	3	1	3	3	1	26.1	26.1	26.1	13.618	115	115;201;153;182;39;87;117	1	31	0.00027027	3.6882	26.1	26.1	7	698860000	87464000	110350000	6186400	0	0	0	8
J3KTA4;P17844;B4DLW8;J3KRZ1;J3QSF1;J3QRQ7;J3KRX8;J3QR02;J3QRN5;X6RLV5;J3QLG9;J3QR62	J3KTA4;P17844;B4DLW8	31;31;28;12;11;10;5;4;2;2;1;1	30;30;27;11;10;10;5;4;2;2;1;1	22;22;19;5;6;8;5;4;2;2;1;1	4113800000	4221700000	4075100000	Probable ATP-dependent RNA helicase DDX5	DDX5	;;	12	31	30	22	30	27	28	29	26	27	21	19	19	59.6	57.8	45.6	69.086	614	614;614;535;166;153;212;120;99;65;96;46;52	1	447	0	231.68	57.7	51.5	49.2	48982000000	4363900000	4579500000	3717800000	25	28	33	318
J3KTD2;C9JTR3;Q86VV8-2;Q86VV8-4;Q86VV8-3;Q86VV8	J3KTD2;C9JTR3;Q86VV8-2;Q86VV8-4;Q86VV8-3;Q86VV8	2;1;1;1;1;1	2;1;1;1;1;1	2;1;1;1;1;1	604610000	599610000	607380000	Rotatin	RTTN	;;;;;	6	2	2	2	2	2	2	2	2	2	2	2	2	3	3	3	56.318	500	500;1593;601;879;2200;2226	1	35	0.0065314	1.934	3	3	3	7417300000	611430000	648190000	539210000	1	1	0	12
J3KTL2;Q07955;Q07955-3;Q07955-2;J3KSR8;J3QQV5;J3KSW7	J3KTL2;Q07955;Q07955-3;Q07955-2	15;15;14;14;6;5;5	15;15;14;14;6;5;5	14;14;13;13;6;5;5	1285700000	1299800000	1332600000	Serine/arginine-rich splicing factor 1	SRSF1	;;;	7	15	15	14	15	15	14	15	15	14	14	14	13	49.8	49.8	47	28.329	253	253;248;201;292;143;65;73	1	227	0	70.516	49.8	49.8	49.8	16211000000	1468300000	1596000000	968570000	14	19	15	201
J3KTL7;Q5QPR4;J3QR29;Q5QPR3;J3QKR5;J3QR44;P21127-6;P21127-9;Q9UQ88-4;P21127-8;Q9UQ88-3;Q9UQ88-2;P21127-3;P21127-2;Q9UQ88;P21127;J3QL65;Q9UQ88-10;P21127-12;P21127-4;P21127-5;P21127-10;Q9UQ88-5;Q9UQ88-9;X6R529;E9PFJ2;G8JLH1;J3KS35;E7ESP2	J3KTL7;Q5QPR4;J3QR29;Q5QPR3;J3QKR5;J3QR44;P21127-6;P21127-9;Q9UQ88-4;P21127-8;Q9UQ88-3;Q9UQ88-2;P21127-3;P21127-2;Q9UQ88;P21127;J3QL65;Q9UQ88-10;P21127-12;P21127-4;P21127-5;P21127-10;Q9UQ88-5;Q9UQ88-9	12;12;12;12;12;12;12;12;12;12;12;12;12;12;12;12;11;11;11;11;11;11;10;7;1;1;1;1;1	12;12;12;12;12;12;12;12;12;12;12;12;12;12;12;12;11;11;11;11;11;11;10;7;1;1;1;1;1	9;9;9;9;9;9;9;9;9;9;9;9;9;9;9;9;8;8;8;8;8;8;7;7;1;1;1;1;1	279620000	286520000	252370000	Cyclin-dependent kinase 11B;Cyclin-dependent kinase 11A	CDC2L1;CDK11A;CDK11B	;;;;;;;;;;;;;;;;;;;;;;;	29	12	12	9	6	6	8	6	6	8	4	4	5	19	19	12.5	85.243	738	738;746;772;779;783;785;738;748;770;772;779;780;781;782;783;795;618;439;439;461;526;565;397;531;75;151;232;407;420	1	117	0	27.184	11.5	11.5	13.7	2921700000	211350000	202910000	219560000	4	2	6	42
J3QK89;Q8IWX8	J3QK89;Q8IWX8	4;4	4;4	4;4	91981000	99944000	137240000	Calcium homeostasis endoplasmic reticulum protein	CHERP	;	2	4	4	4	4	4	4	4	4	4	4	4	4	5.8	5.8	5.8	104.93	927	927;916	1	67	0	17.126	5.8	5.8	5.8	1423600000	92665000	145810000	122520000	2	3	0	20
J3QK90;Q9UNZ2;Q9UNZ2-5;Q9UNZ2-4;F2Z2K0;Q9UNZ2-6;R4GNE6;G3V4V8;R4GMY2	J3QK90;Q9UNZ2;Q9UNZ2-5;Q9UNZ2-4;F2Z2K0;Q9UNZ2-6	16;16;16;15;11;11;3;1;1	16;16;16;15;11;11;3;1;1	16;16;16;15;11;11;3;1;1	440690000	429730000	436620000	NSFL1 cofactor p47	NSFL1C	;;;;;	9	16	16	16	13	10	10	13	10	10	13	10	10	58.9	58.9	58.9	40.844	372	372;370;372;339;274;259;105;35;71	1	162	0	78.737	48.4	40.9	34.4	5065500000	482550000	370500000	257800000	5	7	6	79
J3QL56;O75880	J3QL56;O75880	3;3	3;3	3;3	0	98375000	0	Protein SCO1 homolog, mitochondrial	SCO1	;	2	3	3	3	2	2	2	2	2	2	2	2	2	10.7	10.7	10.7	30.178	270	270;301	1	20	0	4.1546	7.8	7.8	5.9	889260000	69432000	110530000	68280000	0	0	1	6
J3QL71;Q96FV2-2;Q96FV2;J3QQM9;J3QRJ1	J3QL71;Q96FV2-2;Q96FV2;J3QQM9	3;3;3;2;1	3;3;3;2;1	3;3;3;2;1	0	38812000	25204000	Secernin-2	SCRN2	;;;	5	3	3	3	1	2	2	1	2	2	1	2	2	12.9	12.9	12.9	47.493	433	433;378;425;269;271	1	21	0	9.3319	4.6	11.3	6.2	364640000	17789000	38304000	23275000	0	2	1	11
J3QLD9;E7EMK3;Q14254;K7EKW9	J3QLD9;E7EMK3;Q14254;K7EKW9	7;7;7;5	7;7;7;5	7;7;7;5	111620000	123490000	100880000	Flotillin-2	FLOT2	;;;	4	7	7	7	6	5	3	6	5	3	6	5	3	16.1	16.1	16.1	47.142	428	428;483;428;249	1	60	0	13.524	14.3	12.1	7	1232100000	124520000	107180000	66666000	2	2	1	27
J3QLE5;P14678-2;P63162;P14678;B3KVR1;P14678-3;J3KRY3;S4R3P3	J3QLE5;P14678-2;P63162;P14678;B3KVR1;P14678-3;J3KRY3;S4R3P3	8;8;8;8;8;8;5;5	8;8;8;8;8;8;5;5	8;8;8;8;8;8;5;5	1125100000	1116400000	1198600000	Small nuclear ribonucleoprotein-associated proteins B and B;Small nuclear ribonucleoprotein-associated protein N	SNRPN;SNRPB	;;;;;;;	8	8	8	8	7	8	7	7	8	7	7	8	7	35.5	35.5	35.5	17.546	169	169;231;240;240;244;289;59;70	1	163	0	52.125	35.5	35.5	35.5	14818000000	1063300000	1205100000	1055500000	8	11	7	109
J3QLR8;Q9Y3D9	J3QLR8;Q9Y3D9	5;5	5;5	5;5	67664000	66432000	0	28S ribosomal protein S23, mitochondrial	MRPS23	;	2	5	5	5	4	4	2	4	4	2	4	4	2	33.6	33.6	33.6	17.517	152	152;190	1	40	0	5.9897	28.9	28.3	17.1	679970000	83217000	84691000	31544000	1	2	0	7
J3QQ67;Q07020;G3V203;H0YHA7;Q07020-2;F8VYV2;F8VUA6;F8VXR6	J3QQ67;Q07020;G3V203;H0YHA7;Q07020-2;F8VYV2;F8VUA6	9;9;8;8;8;7;6;1	9;9;8;8;8;7;6;1	9;9;8;8;8;7;6;1	3941300000	4300100000	3660600000	60S ribosomal protein L18	RPL18	;;;;;;	8	9	9	9	9	9	8	9	9	8	9	9	8	42.1	42.1	42.1	21.728	190	190;188;164;167;159;133;130;84	1	171	0	76.999	42.1	42.1	35.3	49372000000	4277700000	4630200000	3303600000	5	8	9	93
J3QQT2;J3KRX5;P18621;P18621-3;J3QLC8;P18621-2;J3QS96;J3KRB3;J3KSJ0	J3QQT2;J3KRX5;P18621;P18621-3;J3QLC8;P18621-2;J3QS96;J3KRB3	8;8;8;8;7;7;6;5;1	8;8;8;8;7;7;6;5;1	8;8;8;8;7;7;6;5;1	2125700000	2405800000	2390800000	60S ribosomal protein L17	RPL17	;;;;;;;	9	8	8	8	8	8	7	8	8	7	8	8	7	50.3	50.3	50.3	19.786	171	171;174;184;228;174;146;138;105;56	1	154	0	87.92	50.3	50.3	44.4	30859000000	2327800000	2910800000	2073400000	8	10	8	117
J3QQW9;Q15022	J3QQW9;Q15022	2;2	2;2	2;2	0	19818000	0	Polycomb protein SUZ12	SUZ12	;	2	2	2	2	1	2	1	1	2	1	1	2	1	2.8	2.8	2.8	80.321	716	716;739	1	15	0.0044992	2.0665	1.4	2.8	1.4	109700000	12922000	22267000	4950300	0	1	0	4
J3QR09;J3KTE4;P84098;J3QL15	J3QR09;J3KTE4;P84098	9;9;9;4	9;9;9;4	9;9;9;4	2698800000	3798900000	3726500000	Ribosomal protein L19;60S ribosomal protein L19	RPL19	;;	4	9	9	9	9	9	8	9	9	8	9	9	8	35.8	35.8	35.8	23.134	193	193;194;196;128	1	182	0	77.329	35.8	35.8	31.1	36388000000	3275900000	4173400000	2144000000	10	11	9	129
J3QRD6;J3QRR4;J3QLW7;Q9Y221-2;Q9Y221	J3QRD6;J3QRR4;J3QLW7;Q9Y221-2;Q9Y221	1;1;1;1;1	1;1;1;1;1	1;1;1;1;1	0	0	22439000	60S ribosome subunit biogenesis protein NIP7 homolog	NIP7	;;;;	5	1	1	1	1	1	1	1	1	1	1	1	1	20	20	20	7.9962	70	70;79;110;133;180	1	9	0.00025981	3.1815	20	20	20	149960000	19540000	19974000	19958000	0	0	0	0
J3QRG6;P42771;P42771-4;K7ES20;G3XAG3;K7ENC6;P42771-2;P42771-3;P42772	J3QRG6;P42771;P42771-4;K7ES20;G3XAG3;K7ENC6;P42771-2;P42771-3	6;6;6;3;3;3;3;3;2	6;6;6;3;3;3;3;3;2	6;6;6;3;3;3;3;3;2	1314400000	1183500000	993490000	Cyclin-dependent kinase inhibitor 2A	CDKN2A	;;;;;;;	9	6	6	6	5	6	5	5	6	5	5	6	5	66.7	66.7	66.7	14.968	138	138;156;167;104;116;121;105;116;138	1	113	0	53.887	50.7	66.7	50.7	13039000000	1294000000	1343200000	815230000	7	8	5	71
J3QRS3;P19105;O14950;J3KTJ1	J3QRS3;P19105;O14950;J3KTJ1	8;8;8;4	8;8;8;4	3;3;3;0	1030900000	1117800000	1057700000	Myosin regulatory light chain 12A;Myosin regulatory light chain 12B	MYL12A;MYL12B	;;;	4	8	8	3	7	8	7	7	8	7	3	3	3	60.5	60.5	23.2	20.457	177	177;171;172;114	1	147	0	247.5	55.4	60.5	55.4	14219000000	1157400000	1254800000	986690000	10	11	9	133
J3QRS9;X6R4W8;O43670-2;O43670;O43670-4;O43670-3;J3KS31;J3QS27;J3KTL1;J3KRB6;J3KRW6;H0Y3M2	J3QRS9;X6R4W8;O43670-2;O43670;O43670-4;O43670-3;J3KS31	5;5;5;5;5;4;3;1;1;1;1;1	5;5;5;5;5;4;3;1;1;1;1;1	5;5;5;5;5;4;3;1;1;1;1;1	428060000	488230000	403050000	BUB3-interacting and GLEBS motif-containing protein ZNF207	ZNF207	;;;;;;	12	5	5	5	5	4	4	5	4	4	5	4	4	10.8	10.8	10.8	52.541	493	493;497;463;478;494;395;341;46;74;93;95;198	1	53	0	17.753	10.8	9.1	9.1	4756600000	543740000	519300000	353350000	5	4	4	41
J3QRU4;F8WCA0;L7N2F9;P63027	J3QRU4;F8WCA0;L7N2F9;P63027	4;4;4;4	2;2;2;2	1;1;1;1	36647000	27624000	41535000	Vesicle-associated membrane protein 2	VAMP2	;;;	4	4	2	1	3	3	3	1	1	1	1	1	1	61.1	39.8	14.2	12.251	113	113;118;121;116	1	23	0.00026178	3.261	35.4	35.4	35.4	421520000	38701000	31124000	37709000	2	2	1	16
J3QRZ2;J3QLB7;J3QKS6;J3QRG5;J3KSJ5;Q9BQA9-2;Q9BQA9;J3QKZ6;J3KTI1;J3KSB6;J3KS78;J3QS53;J3KTF4	J3QRZ2;J3QLB7;J3QKS6;J3QRG5;J3KSJ5;Q9BQA9-2;Q9BQA9;J3QKZ6;J3KTI1;J3KSB6;J3KS78;J3QS53;J3KTF4	2;2;2;2;2;2;2;1;1;1;1;1;1	2;2;2;2;2;2;2;1;1;1;1;1;1	2;2;2;2;2;2;2;1;1;1;1;1;1	42959000	26684000	0	Uncharacterized protein C17orf62	C17orf62	;;;;;;;;;;;;	13	2	2	2	2	2	1	2	2	1	2	2	1	18.8	18.8	18.8	13.235	117	117;119;130;148;190;173;187;51;78;78;80;85;88	1	25	0	4.0213	18.8	18.8	12	425030000	58890000	41088000	11879000	1	1	0	11
J3QS48;I3L295;J3KTK8;J3QQZ4;J3KT75;J3QW43;J3QRD5;B4DT74;O75352;I3L405;I3L261;I3L1D2;J3KSI4;I3L4E0	J3QS48;I3L295;J3KTK8;J3QQZ4;J3KT75;J3QW43;J3QRD5;B4DT74;O75352;I3L405;I3L261;I3L1D2	3;3;3;3;3;3;3;3;3;2;2;2;1;1	3;3;3;3;3;3;3;3;3;2;2;2;1;1	3;3;3;3;3;3;3;3;3;2;2;2;1;1	99365000	85416000	88562000	Mannose-P-dolichol utilization defect 1 protein	MPDU1	;;;;;;;;;;;	14	3	3	3	3	3	3	3	3	3	3	3	3	41.6	41.6	41.6	10.978	101	101;109;116;152;154;192;193;186;247;54;61;61;52;75	1	35	0	6.4381	41.6	41.6	41.6	1200700000	105840000	110420000	87359000	0	2	1	8
J3QTA2;Q99933-4;Q99933-3;Q99933;Q99933-2;C9JYK5;F1LLU6	J3QTA2;Q99933-4;Q99933-3;Q99933;Q99933-2	8;8;8;8;7;3;1	8;8;8;8;7;3;1	8;8;8;8;7;3;1	111360000	117800000	137750000	BAG family molecular chaperone regulator 1	BAG1	;;;;	7	8	8	8	6	6	5	6	6	5	6	6	5	30.4	30.4	30.4	38.76	345	345;230;274;345;311;150;160	1	75	0	33.503	20.3	23.5	16.2	1599000000	153800000	150960000	128650000	3	3	3	28
J9JID7;Q03252	J9JID7;Q03252	16;16	12;12	12;12	92980000	126270000	115010000	Lamin-B2	LMNB2	;	2	16	12	12	13	12	10	10	8	7	10	8	7	25.2	21.1	21.1	69.948	620	620;600	1	82	0	16.366	20.8	17.4	15.8	1333100000	137830000	165730000	127950000	6	2	5	33
J9JIE6;Q9UM00-2;Q9UM00;J3QQY2;J3KS45;J3KTQ7	J9JIE6;Q9UM00-2;Q9UM00;J3QQY2;J3KS45	4;4;4;3;2;1	4;4;4;3;2;1	4;4;4;3;2;1	500760000	547770000	582670000	Transmembrane and coiled-coil domain-containing protein 1	TMCO1	;;;;	6	4	4	4	4	4	4	4	4	4	4	4	4	19.2	19.2	19.2	27.079	239	239;169;188;104;143;152	1	60	0	41.184	19.2	19.2	19.2	6941800000	548870000	610940000	542510000	3	5	5	44
K4DI93;Q13620-1;Q13620;Q13620-3;A6NE76	K4DI93;Q13620-1;Q13620;Q13620-3	32;32;32;31;10	32;32;32;31;10	20;20;20;19;7	734090000	734800000	749940000	Cullin-4B	CUL4B	;;;	5	32	32	20	25	25	24	25	25	24	16	18	14	34	34	22.1	102.75	900	900;895;913;717;234	1	335	0	103.12	28.2	27.7	26.9	9547300000	724210000	1413800000	588760000	8	17	15	166
K7EIE8;O95983-2;O95983	K7EIE8;O95983-2;O95983	3;3;3	3;3;3	3;3;3	0	37407000	0	Methyl-CpG-binding domain protein 3	MBD3	;;	3	3	3	3	1	3	1	1	3	1	1	3	1	16.6	16.6	16.6	26.322	235	235;259;291	1	23	0	7.7488	6	16.6	6	301410000	14159000	35449000	0	1	3	1	14
K7EIG1;O75153;I3L318;I3L4B5	K7EIG1;O75153	16;16;2;1	16;16;2;1	2;2;0;0	183210000	211240000	183470000	Clustered mitochondria protein homolog	CLUH	;	4	16	16	2	11	10	11	11	10	11	1	1	1	16.5	16.5	1.9	140.49	1251	1251;1309;164;160	1	130	0	25.392	10.7	9.8	10.5	2542400000	145830000	148450000	136370000	4	6	6	61
K7EIT2;Q9Y5L4	K7EIT2;Q9Y5L4	3;3	3;3	3;3	0	0	72741000	Mitochondrial import inner membrane translocase subunit Tim13	TIMM13	;	2	3	3	3	2	3	3	2	3	3	2	3	3	46.2	46.2	46.2	8.8941	80	80;95	1	26	0	6.2853	32.5	46.2	46.2	514130000	63956000	69580000	64697000	1	1	0	5
K7EIU8;Q13485;K7ES96;K7ELK2;K7ENG1;K7EL15;K7EL18;K7EIJ2;K7ENG8;L7N2F7;Q12772	K7EIU8;Q13485;K7ES96	4;4;2;1;1;1;1;1;1;1;1	4;4;2;1;1;1;1;1;1;1;1	4;4;2;1;1;1;1;1;1;1;1	0	47619000	0	Mothers against decapentaplegic homolog;Mothers against decapentaplegic homolog 4	SMAD4	;;	11	4	4	4	3	3	2	3	3	2	3	3	2	11.2	11.2	11.2	50.052	456	456;552;320;82;90;120;126;140;151;177;1141	1	30	0.0069963	1.9245	5.9	5.9	7	446370000	52184000	53503000	10944000	0	0	1	3
K7EJC8;E9PCW1;O95249;F6RU00;B4DQA8;G5E9T8;O95249-2	K7EJC8;E9PCW1;O95249;F6RU00;B4DQA8;G5E9T8;O95249-2	2;2;2;1;1;1;1	2;2;2;1;1;1;1	2;2;2;1;1;1;1	34922000	33479000	32042000	Golgi SNAP receptor complex member 1	GOSR1	;;;;;;	7	2	2	2	2	2	2	2	2	2	2	2	2	8.5	8.5	8.5	26.989	236	236;248;250;81;174;255;185	1	22	0.009957	1.6427	8.5	8.5	8.5	353850000	33918000	38288000	29056000	2	0	0	2
K7EJH8	K7EJH8	11	1	1	0	35969000	0		ACTN4		1	11	1	1	10	10	9	1	1	0	1	1	0	61.5	8.8	8.8	21.43	182	182	1	3	0.00026274	3.3269	61.5	61.5	52.7	102340000	38022000	40414000	0	0	1	0	2
K7EJQ7;Q9BY50	K7EJQ7;Q9BY50	4;4	4;4	4;4	74528000	84332000	76648000	Signal peptidase complex catalytic subunit SEC11;Signal peptidase complex catalytic subunit SEC11C	SEC11C	;	2	4	4	4	4	3	2	4	3	2	4	3	2	24.2	24.2	24.2	18.095	161	161;192	1	33	0	8.5929	24.2	19.3	18.6	873720000	104180000	117280000	43900000	1	2	2	18
K7EK00;Q96ND0	K7EK00;Q96ND0	2;2	2;2	2;2	0	29524000	28064000	Protein FAM210A	FAM210A	;	2	2	2	2	1	2	2	1	2	2	1	2	2	9.3	9.3	9.3	30.292	268	268;272	1	13	0	4.9174	4.9	9.3	9.3	199080000	17792000	32802000	25254000	1	1	1	8
K7EKE6;K7EJE8;P36776-2;P36776;P36776-3;K7ER27;K7ERR6;K7ER56;K7EQF8	K7EKE6;K7EJE8;P36776-2;P36776;P36776-3	32;31;31;31;29;10;7;3;2	32;31;31;31;29;10;7;3;2	32;31;31;31;29;10;7;3;2	1045400000	1135000000	1220200000	Lon protease homolog, mitochondrial	LONP1	;;;;	9	32	32	32	19	22	22	19	22	22	19	22	22	52.2	52.2	52.2	95.179	845	845;829;895;959;763;242;264;210;185	1	338	0	136.99	31.1	37.8	32.2	14463000000	1065700000	1226800000	926930000	12	19	12	178
K7EKI0;Q92817	K7EKI0;Q92817	3;3	3;3	3;3	0	17137000	22782000	Envoplakin	EVPL	;	2	3	3	3	2	3	3	2	3	3	2	3	3	1.5	1.5	1.5	233.83	2055	2055;2033	1	34	0.0036049	2.225	1	1.5	1.5	198670000	12873000	21350000	17016000	0	1	0	6
K7EKI8;O60437;K7EQ71	K7EKI8;O60437;K7EQ71	27;27;20	27;27;20	27;27;20	158950000	200110000	181260000	Periplakin	PPL	;;	3	27	27	27	12	15	12	12	15	12	12	15	12	17.6	17.6	17.6	204.49	1754	1754;1756;1115	1	186	0	45.38	7.9	9.1	7.4	2632100000	149880000	206050000	122500000	3	3	7	64
K7ELC2;P62841;K7EM56;K7EQJ5;K7EJ78;S4R456	K7ELC2;P62841;K7EM56;K7EQJ5;K7EJ78;S4R456	8;8;7;7;5;4	8;8;7;7;5;4	8;8;7;7;5;4	2424600000	2225000000	1973600000	40S ribosomal protein S15	RPS15	;;;;;	6	8	8	8	6	8	8	6	8	8	6	8	8	66.4	66.4	66.4	17.723	152	152;145;112;141;129;68	1	174	0	83.326	51.3	66.4	66.4	26983000000	1961000000	2647200000	2317900000	12	13	11	134
K7ELL7;P14314;K7EPW7;K7EKX1;K7EJ70;K7EIP3	K7ELL7;P14314	25;24;10;6;6;2	1;0;0;0;0;0	1;0;0;0;0;0	0	26037000	0	Glucosidase 2 subunit beta	PRKCSH	;	6	25	1	1	23	24	21	0	1	0	0	1	0	55	7.1	7.1	60.192	535	535;528;168;140;144;62	1	2	1	-2	46.5	50.1	46.5	46448000	0	29254000	0	0	1	0	1
K7ELQ9;Q6UW68;K7EM09;K7EPR0;K7ER05;K7EJQ9	K7ELQ9;Q6UW68;K7EM09;K7EPR0	3;3;2;2;1;1	3;3;2;2;1;1	3;3;2;2;1;1	0	136530000	0	Transmembrane protein 205	TMEM205	;;;	6	3	3	3	2	2	2	2	2	2	2	2	2	22.9	22.9	22.9	19.27	170	170;189;120;128;88;107	1	37	0	21.258	17.6	15.3	17.6	1945000000	209320000	172300000	117300000	1	0	2	12
K7ELX4;P22830;P22830-2;K7EJM8;K7EJX5;K7EKP7	K7ELX4;P22830;P22830-2	3;3;3;1;1;1	3;3;3;1;1;1	3;3;3;1;1;1	27631000	0	0	Ferrochelatase, mitochondrial	FECH	;;	6	3	3	3	2	1	0	2	1	0	2	1	0	16.6	16.6	16.6	37.01	326	326;423;429;111;143;165	1	11	0	4.8551	12	4.9	0	153990000	28784000	19648000	0	0	1	0	2
K7EM02;K7EIJ8;Q8IYT4-2;Q8IYT4	K7EM02;K7EIJ8;Q8IYT4-2;Q8IYT4	1;1;1;1	1;1;1;1	1;1;1;1	0	0	433720000	Katanin p60 ATPase-containing subunit A-like 2	KATNAL2	;;;	4	1	1	1	1	1	1	1	1	1	1	1	1	9.4	9.4	9.4	13.999	128	128;341;466;538	1	12	0.00051046	2.9111	9.4	9.4	9.4	3818100000	433670000	489210000	385760000	1	1	1	14
K7EM18;P41567;K7EQP2	K7EM18;P41567	9;9;1	9;9;1	4;4;0	602780000	573260000	573730000	Eukaryotic translation initiation factor 1	EIF1	;	3	9	9	4	9	8	7	9	8	7	4	3	3	71.9	71.9	38.8	13.607	121	121;113;53	1	108	0	211.48	71.9	71.9	71.1	7257900000	729580000	686180000	491120000	5	7	5	67
K7EM62;O95427	K7EM62;O95427	1;1	1;1	1;1	120260000	90843000	0	GPI ethanolamine phosphate transferase 1	PIGN	;	2	1	1	1	1	1	1	1	1	1	1	1	1	6.2	6.2	6.2	29.306	257	257;931	1	22	0.0024655	2.519	6.2	6.2	6.2	1605100000	132040000	116640000	27538000	1	0	0	8
K7EM93;K7EIL9;K7ES22;K7ELW9;Q9NVP2	K7EM93;K7EIL9;K7ES22;K7ELW9;Q9NVP2	2;1;1;1;1	2;1;1;1;1	2;1;1;1;1	60536000	0	0	Histone chaperone ASF1B	ASF1B	;;;;	5	2	2	2	2	1	1	2	1	1	2	1	1	75	75	75	5.3901	48	48;81;143;165;202	1	13	0.0029261	2.388	75	33.3	41.7	356140000	65457000	49170000	9386200	0	0	1	5
K7EMV3;B4DEB1;K7EK07;K7ES00;Q71DI3;Q16695;P84243;P68431;K7EP01;Q5TEC6;Q6NXT2	K7EMV3;B4DEB1;K7EK07;K7ES00;Q71DI3;Q16695;P84243;P68431;K7EP01;Q5TEC6;Q6NXT2	3;3;3;3;3;3;3;3;2;2;2	3;3;3;3;3;3;3;3;2;2;2	3;3;3;3;3;3;3;3;2;2;2	1231200000	1107700000	1167500000	Histone H3;Histone H3.2;Histone H3.1t;Histone H3.3;Histone H3.1;Histone H3.3C	H3F3B;H3F3A;HIST2H3A;HIST3H3;HIST1H3A;HIST2H3PS2;H3F3C	;;;;;;;;;;	11	3	3	3	3	3	3	3	3	3	3	3	3	25	25	25	10.334	92	92;123;132;151;136;136;136;136;113;136;135	1	54	0	36.757	25	25	25	15794000000	1126800000	1091200000	1012300000	3	3	2	36
K7EMY9;K7EPM4;K7EQR7;D6W5Y5;Q14011;B4E2X2;K7ELV6;K7ENX8;K7EJV5;K7ELT6;K7ER40;K7EQX4;K7ENN6;K7EIF7;K7EQL0;K7ELL4;B3KT17	K7EMY9;K7EPM4;K7EQR7;D6W5Y5;Q14011;B4E2X2;K7ELV6;K7ENX8;K7EJV5;K7ELT6;K7ER40	3;3;3;3;3;3;2;2;2;2;2;1;1;1;1;1;1	3;3;3;3;3;3;2;2;2;2;2;1;1;1;1;1;1	3;3;3;3;3;3;2;2;2;2;2;1;1;1;1;1;1	39502000	38310000	42391000	Cold-inducible RNA-binding protein	CIRBP	;;;;;;;;;;	17	3	3	3	2	3	2	2	3	2	2	3	2	25.8	25.8	25.8	17.045	159	159;168;202;297;172;263;70;89;105;135;173;32;37;60;79;85;244	1	35	0	7.6846	18.9	25.8	20.1	479980000	19147000	40676000	25425000	1	0	1	15
K7ENB4;K7EKX7;K7EJ20;P36969-2;P36969;R4GNE4;K7ERP4	K7ENB4;K7EKX7;K7EJ20;P36969-2;P36969;R4GNE4;K7ERP4	4;4;4;4;4;3;3	4;4;4;4;4;3;3	4;4;4;4;4;3;3	64468000	58935000	66968000	Glutathione peroxidase;Phospholipid hydroperoxide glutathione peroxidase, mitochondrial	GPX4	;;;;;;	7	4	4	4	3	4	4	3	4	4	3	4	4	28.9	28.9	28.9	19.944	180	180;194;260;170;197;145;155	1	41	0	10.802	22.8	28.9	28.9	833380000	64008000	62242000	97646000	1	3	1	22
K7END9;K7EK68;Q6UWP2-2;Q6UWP2	K7END9;K7EK68;Q6UWP2-2;Q6UWP2	1;1;1;1	1;1;1;1	1;1;1;1	0	0	51193000	Dehydrogenase/reductase SDR family member 11	DHRS11	;;;	4	1	1	1	1	0	1	1	0	1	1	0	1	10.1	10.1	10.1	12.177	109	109;150;181;260	1	4	0.004961	2.0281	10.1	0	10.1	97568000	4685300	0	45532000	0	0	1	3
K7ENI6;K7ERE1;Q8N2U0	K7ENI6;K7ERE1;Q8N2U0	1;1;1	1;1;1	1;1;1	0	0	53471000	Transmembrane protein 256	TMEM256	;;	3	1	1	1	1	1	1	1	1	1	1	1	1	68.3	68.3	68.3	3.9694	41	41;68;113	1	13	0	4.2243	68.3	68.3	68.3	522300000	33503000	50269000	47558000	0	0	1	9
K7ENL2;K7EMC9;Q969T9;K7EIJ0;B4DFG2;A6NG10;K7EIN1;K7ESN4;K7EIK1	K7ENL2;K7EMC9;Q969T9;K7EIJ0;B4DFG2;A6NG10	4;4;4;3;3;3;1;1;1	4;4;4;3;3;3;1;1;1	4;4;4;3;3;3;1;1;1	132160000	143270000	0	WW domain-binding protein 2	WBP2	;;;;;	9	4	4	4	3	3	2	3	3	2	3	3	2	22.1	22.1	22.1	24.71	231	231;257;261;167;216;239;114;152;205	1	32	0	9.8638	22.1	22.1	8.7	835320000	116270000	120710000	37137000	1	1	0	12
K7ENL3;P40763;P40763-2;G8JLH9;K7EP08	K7ENL3;P40763;P40763-2;G8JLH9	24;24;23;19;3	24;24;23;19;3	24;24;23;19;3	1225000000	1300200000	1280200000	Signal transducer and activator of transcription 3;Signal transducer and activator of transcription	STAT3	;;;	5	24	24	24	19	19	20	19	19	20	19	19	20	51.9	51.9	51.9	83.125	722	722;770;769;672;84	1	359	0	321.62	40.2	42.1	41.4	15269000000	1434700000	1236100000	1130100000	18	16	20	215
K7ENP1;Q7Z4G4-3;Q7Z4G4-2;Q7Z4G4;Q5JY01;Q5JY02;K7EPZ4;K7EJQ4	K7ENP1;Q7Z4G4-3;Q7Z4G4-2;Q7Z4G4;Q5JY01;Q5JY02	4;4;4;4;2;2;1;1	4;4;4;4;2;2;1;1	4;4;4;4;2;2;1;1	49263000	0	0	tRNA (guanine(10)-N2)-methyltransferase homolog	TRMT11	;;;;;	8	4	4	4	3	3	1	3	3	1	3	3	1	21.3	21.3	21.3	26.453	230	230;257;458;463;93;134;82;86	1	23	0	13.795	20.9	21.3	5.7	281980000	51319000	42967000	5004800	0	0	1	5
K7ENR6;V9GYH7;Q969U7;V9GZ55;K7ER45	K7ENR6;V9GYH7;Q969U7;V9GZ55	8;8;8;7;2	8;8;8;7;2	8;8;8;7;2	381700000	312380000	403260000	Proteasome assembly chaperone 2	PSMG2	;;;	5	8	8	8	8	8	7	8	8	7	8	8	7	28.3	28.3	28.3	26.696	240	240;233;264;209;98	1	111	0	20.691	28.3	28.3	27.9	4305100000	382360000	366650000	374340000	7	7	4	62
K7EQ02;Q96EP5-2;Q96EP5	K7EQ02;Q96EP5-2;Q96EP5	9;9;9	9;9;9	9;9;9	382470000	390120000	409800000	DAZ-associated protein 1	DAZAP1	;;	3	9	9	9	6	9	8	6	9	8	6	9	8	60.9	60.9	60.9	24.805	225	225;378;407	1	140	0	33.518	39.6	60.9	54.2	5061500000	356930000	575990000	407260000	2	5	5	57
K7EQ03;K7EP90;Q9BTD8-4;Q9BTD8-2;Q9BTD8-3;Q9BTD8;K7ER08	K7EQ03;K7EP90;Q9BTD8-4;Q9BTD8-2;Q9BTD8-3;Q9BTD8;K7ER08	4;4;4;4;4;4;3	4;4;4;4;4;4;3	4;4;4;4;4;4;3	59128000	65810000	68097000	RNA-binding protein 42	RBM42	;;;;;;	7	4	4	4	3	4	4	3	4	4	3	4	4	10.6	10.6	10.6	44.638	426	426;458;446;450;451;480;386	1	48	0	23.917	8.9	10.6	10.6	878200000	66612000	84092000	65173000	0	1	2	25
K7EQ95;K7EKF7;O00555-5;O00555-6	K7EQ95;K7EKF7;O00555-5;O00555-6	1;1;1;1	1;1;1;1	1;1;1;1	0	0	152940000		CACNA1A	;;;	4	1	1	1	1	1	1	1	1	1	1	1	1	1.5	1.5	1.5	110.38	981	981;1180;2249;2493	1	12	0.0040515	2.1341	1.5	1.5	1.5	1313500000	99567000	144210000	136020000	1	1	1	9
K7EQG1;Q9NXS2-3;Q9NXS2	K7EQG1;Q9NXS2-3;Q9NXS2	2;2;2	2;2;2	2;2;2	44720000	0	0	Glutaminyl-peptide cyclotransferase-like protein	QPCTL	;;	3	2	2	2	2	1	1	2	1	1	2	1	1	18.2	18.2	18.2	13.98	121	121;288;382	1	19	0.00051112	2.9182	18.2	9.1	9.1	378120000	46586000	21592000	12097000	0	0	0	2
K7ER15;Q9H0R4;K7EMY7;Q9H0R4-2;K7EJQ8;K7ENF3;K7EQD2	K7ER15;Q9H0R4;K7EMY7;Q9H0R4-2	3;3;2;2;1;1;1	3;3;2;2;1;1;1	3;3;2;2;1;1;1	29961000	28860000	27434000	Haloacid dehalogenase-like hydrolase domain-containing protein 2	HDHD2	;;;	7	3	3	3	3	3	2	3	3	2	3	3	2	19.6	19.6	19.6	22.49	204	204;259;146;169;122;131;132	1	32	0	9.7303	19.6	19.6	15.7	363000000	30997000	33209000	18662000	2	3	1	25
K7ER90;K7EL60	K7ER90	10;1	1;0	1;0	0	0	10786000		EIF3G		2	10	1	1	7	7	8	0	0	1	0	0	1	44.1	4.8	4.8	25.441	227	227;149	1	10	1	-2	35.2	35.2	36.1	148360000	0	0	9593000	0	0	0	2
K7ERA3;Q92791	K7ERA3;Q92791	3;3	3;3	3;3	0	33415000	0	Synaptonemal complex protein SC65	P3H4;LEPREL4	;	2	3	3	3	1	3	1	1	3	1	1	3	1	14.9	14.9	14.9	25.874	221	221;437	1	21	0.0031477	2.314	5	14.9	5	258520000	9814300	37545000	8425800	0	0	0	1
K7ERC8;Q06136;K7EQS7;B4DMX0	K7ERC8;Q06136;K7EQS7;B4DMX0	4;4;2;2	4;4;2;2	4;4;2;2	107770000	88618000	113850000	3-ketodihydrosphingosine reductase	KDSR	;;;	4	4	4	4	2	3	2	2	3	2	2	3	2	29.1	29.1	29.1	22.62	203	203;332;155;268	1	28	0	9.5632	16.7	22.2	12.3	994100000	43593000	83057000	161940000	2	1	1	13
K7ERD8;Q15555-2;G5E9I6;Q15555-3;Q15555;K7EL66;Q15555-4;M0QX52;K7ENB3	K7ERD8;Q15555-2;G5E9I6;Q15555-3;Q15555;K7EL66;Q15555-4;M0QX52	8;8;8;8;8;7;7;5;2	8;8;8;8;8;7;7;5;2	7;7;7;7;7;6;6;4;1	221050000	170720000	151350000	Microtubule-associated protein RP/EB family member 2	MAPRE2	;;;;;;;	9	8	8	7	6	8	6	6	8	6	5	7	5	39.7	39.7	34.5	21.594	194	194;259;284;315;327;134;274;127;78	1	97	0	14.831	34.5	39.7	26.3	2156900000	189620000	220540000	182960000	6	4	1	35
K7ERN7;Q9NVX2	K7ERN7;Q9NVX2	2;2	2;2	2;2	0	14561000	0	Notchless protein homolog 1	NLE1	;	2	2	2	2	2	2	0	2	2	0	2	2	0	18.9	18.9	18.9	13.717	127	127;485	1	14	0.00025727	3.0154	18.9	18.9	0	133100000	15946000	16361000	0	1	1	0	2
K7ES54;O95633-2;O95633	K7ES54;O95633-2;O95633	3;3;3	3;3;3	3;3;3	0	8860500	0	Follistatin-related protein 3	FSTL3	;;	3	3	3	3	2	1	0	2	1	0	2	1	0	24	24	24	18.833	179	179;237;263	1	14	0.00026455	3.3981	16.8	10.1	0	143110000	15902000	9955400	0	1	0	0	4
K7ES61;Q9BYD3;X6RAY8;Q9BYD3-2;K7ELQ0;K7EKI4;K7ELF1;K7EJ73	K7ES61;Q9BYD3;X6RAY8;Q9BYD3-2;K7ELQ0;K7EKI4;K7ELF1	6;6;5;5;4;3;3;1	6;6;5;5;4;3;3;1	6;6;5;5;4;3;3;1	106680000	116770000	109330000	39S ribosomal protein L4, mitochondrial	MRPL4	;;;;;;	8	6	6	6	2	5	4	2	5	4	2	5	4	33.3	33.3	33.3	33.792	300	300;311;357;263;220;127;163;119	1	62	0	24.326	14	28	21.7	1426900000	73497000	115120000	82974000	2	3	1	39
K7ES92;F5H4A3;F5H1R4;K7ES98;K7EM85;Q92619;Q92619-2	K7ES92;F5H4A3;F5H1R4;K7ES98;K7EM85;Q92619;Q92619-2	3;3;3;3;3;3;3	3;3;3;3;3;3;3	3;3;3;3;3;3;3	86031000	80145000	87315000	Minor histocompatibility protein HA-1;Minor histocompatibility antigen HA-1	HMHA1	;;;;;;	7	3	3	3	2	3	3	2	3	3	2	3	3	4.2	4.2	4.2	84.622	771	771;1004;1019;1140;1163;1136;1152	1	32	0	4.4692	3	4.2	4.2	973760000	25670000	119930000	100120000	2	2	2	18
K7ESE6;Q9BUM1	K7ESE6;Q9BUM1	1;1	1;1	1;1	0	0	22795000	Glucose-6-phosphatase 3	G6PC3	;	2	1	1	1	0	0	1	0	0	1	0	0	1	8.6	8.6	8.6	27.607	243	243;346	1	7	0	5.8379	0	0	8.6	120420000	0	0	20275000	0	0	1	4
L0R819	L0R819	2	2	2	21900000	0	0		ASNSD1		1	2	2	2	2	1	1	2	1	1	2	1	1	18.8	18.8	18.8	11.25	96	96	1	12	0.0076301	1.8407	18.8	8.3	8.3	89431000	22814000	8262200	5944200	0	1	0	2
M0QWZ7;Q9NP81;E7EX87;M0R2C6;Q9NP81-2;M0R259;B4DJM9;M0QX29;M0R2H5;M0R1C0	M0QWZ7;Q9NP81;E7EX87;M0R2C6;Q9NP81-2;M0R259	12;12;10;10;10;6;5;4;2;1	12;12;10;10;10;6;5;4;2;1	12;12;10;10;10;6;5;4;2;1	156750000	163730000	166820000	Serine--tRNA ligase, mitochondrial	SARS2	;;;;;	10	12	12	12	7	8	9	7	8	9	7	8	9	33.4	33.4	33.4	58.182	518	518;518;518;588;520;328;236;187;135;90	1	111	0	57.889	21	22.4	26.6	1976900000	147700000	166150000	137540000	5	3	5	52
M0QX35;Q8N7H5;F8W9Q2;Q8N7H5-2;B4DGJ5	M0QX35;Q8N7H5;F8W9Q2;Q8N7H5-2;B4DGJ5	7;7;6;6;4	7;7;6;6;4	7;7;6;6;4	0	82310000	66986000	RNA polymerase II-associated factor 1 homolog	PAF1	;;;;	5	7	7	7	2	4	3	2	4	3	2	4	3	18.6	18.6	18.6	55.472	485	485;531;462;485;288	1	49	0	24.271	4.1	8.9	7	826650000	36951000	93346000	43316000	0	2	1	13
M0QXZ5;Q96B54	M0QXZ5;Q96B54	3;3	3;3	3;3	14171000	0	0	Zinc finger protein 428	ZNF428	;	2	3	3	3	2	1	0	2	1	0	2	1	0	19.3	19.3	19.3	23.568	218	218;188	1	14	0	5.8852	14.2	5	0	158860000	18679000	15793000	0	1	0	0	7
M0QY97;Q9UPT8	M0QY97;Q9UPT8	4;4	4;4	4;4	48339000	40454000	61412000	Zinc finger CCCH domain-containing protein 4	ZC3H4	;	2	4	4	4	3	3	2	3	3	2	3	3	2	10.5	10.5	10.5	95.425	910	910;1303	1	35	0	4.1779	8.5	8.2	5.2	578640000	43116000	46479000	24559000	2	1	1	12
M0QYA2;Q9NWS0;M0R2P8;M0R3A4;M0QXD5;M0R0J2;M0QYF4;Q9NWS0-3	M0QYA2;Q9NWS0;M0R2P8;M0R3A4;M0QXD5	4;4;2;2;2;1;1;1	4;4;2;2;2;1;1;1	3;3;2;2;1;0;0;0	70286000	62479000	77439000	PIH1 domain-containing protein 1	PIH1D1	;;;;	8	4	4	3	2	3	3	2	3	3	1	2	2	28.6	28.6	19.8	30.672	273	273;290;114;183;236;82;164;199	1	37	0	8.5752	18.3	23.4	23.4	836740000	45541000	60027000	76085000	0	0	2	12
M0QYH2;Q96T60;M0QX49;M0QYI1	M0QYH2;Q96T60	5;5;1;1	5;5;1;1	1;1;0;0	57012000	51207000	54024000	Bifunctional polynucleotide phosphatase/kinase;Polynucleotide 3-phosphatase;Polynucleotide 5-hydroxyl-kinase	PNKP	;	4	5	5	1	4	4	3	4	4	3	1	1	1	16.7	16.7	2.7	53.64	490	490;521;51;66	1	43	0	11.908	14.3	14.3	10.8	715840000	63200000	64503000	36430000	3	3	3	31
M0QYM7;M0R042	M0QYM7;M0R042	5;4	1;1	1;1	0	0	55244000		TUBB4A	;	2	5	1	1	5	4	5	1	0	1	1	0	1	68.1	8.8	8.8	17.763	160	160;144	1	11	1	-2	68.1	59.4	68.1	418060000	5706000	0	49135000	0	0	0	5
M0QYZ2;M0R0N4;P53680;X6R390;P53680-2;M0QZ21;M0R1S0	M0QYZ2;M0R0N4;P53680;X6R390;P53680-2;M0QZ21	7;6;6;5;5;4;2	7;6;6;5;5;4;2	7;6;6;5;5;4;2	238160000	208860000	240130000	AP-2 complex subunit sigma	AP2S1	;;;;;	7	7	7	7	5	5	3	5	5	3	5	5	3	44.3	44.3	44.3	18.929	158	158;144;142;156;104;122;92	1	65	0	9.2007	32.3	27.2	17.7	2514800000	198760000	426700000	110250000	4	4	2	36
M0QZ22;Q5PRF9;M0R0X3;M0QY61;M0QXV2	M0QZ22;Q5PRF9;M0R0X3	5;5;3;2;1	5;5;3;2;1	5;5;3;2;1	38436000	39873000	37645000	Protein Smaug homolog 2	SAMD4B	;;	5	5	5	5	5	5	4	5	5	4	5	5	4	12.6	12.6	12.6	75.292	692	692;694;325;219;75	1	44	0	4.8257	12.6	12.6	9.1	445340000	55213000	64264000	40788000	0	2	0	9
M0QZR4;Q92888;Q92888-3;Q92888-2;Q6NX52;M0QYC1;M0QYS3;M0QZH8;M0R2C7;M0R3H5	M0QZR4;Q92888;Q92888-3;Q92888-2;Q6NX52;M0QYC1	16;16;16;15;12;9;5;4;3;1	16;16;16;15;12;9;5;4;3;1	16;16;16;15;12;9;5;4;3;1	236310000	244760000	286120000	Rho guanine nucleotide exchange factor 1	ARHGEF1	;;;;;	10	16	16	16	13	14	9	13	14	9	13	14	9	19.6	19.6	19.6	108.32	968	968;912;927;879;948;702;307;275;291;88	1	175	0	83.67	17.3	18.3	12.3	3295100000	276350000	265000000	228460000	3	9	7	76
M0QZW1;Q9BZL6;M0R2R2;M0QXC6	M0QZW1;Q9BZL6;M0R2R2	5;5;3;1	5;5;3;1	4;4;2;1	0	0	26415000	Serine/threonine-protein kinase;Serine/threonine-protein kinase D2	PRKD2	;;	4	5	5	4	1	4	3	1	4	3	1	3	2	9.2	9.2	7.7	97.77	888	888;878;721;73	1	25	0	10.878	1.9	7.3	5.2	226030000	12976000	23578000	25800000	1	1	2	10
M0R0F0;P46782;M0R0R2;M0QZN2	M0R0F0;P46782;M0R0R2;M0QZN2	12;12;11;7	12;12;11;7	12;12;11;7	2441000000	2392800000	2728900000	40S ribosomal protein S5;40S ribosomal protein S5, N-terminally processed	RPS5	;;;	4	12	12	12	10	10	9	10	10	9	10	10	9	59	59	59	22.391	200	200;204;225;134	1	209	0	84.458	55	55.5	50.5	29780000000	2870100000	2704600000	2303300000	14	12	8	143
M0R0P9;Q0VAN0;P31751;J3QKW1;J3QL45;M0QZW8;M0R283;J3QLS6;C9JHS6;J3KTP4;G3V4I6;C9J258;J3QQM6;J3KSY8;G3V3K5;C9JC83;C9JIJ1;M0R275;J3KRI8;F6YBB4;A8MX96;E7EVP8;F8VS91;M0QZK3;Q9Y243-2;Q9Y243	M0R0P9;Q0VAN0;P31751;J3QKW1;J3QL45	6;6;6;4;3;2;2;2;2;1;1;1;1;1;1;1;1;1;1;1;1;1;1;1;1;1	6;6;6;4;3;2;2;2;2;1;1;1;1;1;1;1;1;1;1;1;1;1;1;1;1;1	4;4;4;3;2;1;2;1;1;0;0;0;0;0;0;0;0;1;0;0;0;0;0;0;0;0	61482000	62484000	64237000	RAC-beta serine/threonine-protein kinase	AKT2	;;;;	26	6	6	4	5	3	5	5	3	5	3	3	4	14	14	9.3	51.571	450	450;438;481;292;106;56;117;157;184;51;91;95;96;99;105;107;119;129;130;132;133;134;139;151;465;479	1	50	0	10.32	11.1	6.4	11.6	712070000	93738000	56077000	71912000	0	0	2	17
M0R165;Q9UBC2-3;Q9UBC2;Q9UBC2-2;Q9UBC2-4;M0R2S2;M0R1V5;M0QX30;M0R3I1;K7EJR2;M0R330	M0R165;Q9UBC2-3;Q9UBC2;Q9UBC2-2;Q9UBC2-4;M0R2S2	11;11;11;11;10;7;3;2;2;1;1	11;11;11;11;10;7;3;2;2;1;1	11;11;11;11;10;7;3;2;2;1;1	169280000	148390000	149620000	Epidermal growth factor receptor substrate 15-like 1	EPS15L1	;;;;;	11	11	11	11	8	9	8	8	9	8	8	9	8	21.7	21.7	21.7	83.474	756	756;754;864;910;601;447;110;90;213;79;83	1	96	0	22.686	16.9	17.7	17.1	1958300000	163590000	158710000	158780000	3	1	5	39
M0R208;Q16740;M0QYV5	M0R208;Q16740	7;7;3	7;7;3	7;7;3	170500000	120970000	141260000	ATP-dependent Clp protease proteolytic subunit;ATP-dependent Clp protease proteolytic subunit, mitochondrial	CLPP	;	3	7	7	7	5	5	4	5	5	4	5	5	4	47.9	47.9	47.9	20.568	190	190;277;160	1	69	0	41.864	31.6	32.1	25.8	1824200000	138160000	88446000	83580000	3	2	0	34
M0R2A0;Q5UCC4-2;Q5UCC4	M0R2A0;Q5UCC4-2;Q5UCC4	3;3;3	3;3;3	3;3;3	70823000	83637000	68830000	ER membrane protein complex subunit 10	EMC10	;;	3	3	3	3	2	3	3	2	3	3	2	3	3	13.2	13.2	13.2	38.975	371	371;254;262	1	31	0	53.537	11.3	13.2	13.2	1077100000	54248000	125610000	79204000	3	3	2	27
M0R2B7;P28340;M0QZR8;M0QXE6;M0QZB4;M0QXQ2;M0R3H8	M0R2B7;P28340;M0QZR8	10;10;9;3;2;1;1	10;10;9;3;2;1;1	10;10;9;3;2;1;1	72809000	69679000	83666000	DNA polymerase;DNA polymerase delta catalytic subunit	POLD1	;;	7	10	10	10	7	8	5	7	8	5	7	8	5	11.9	11.9	11.9	126.39	1133	1133;1107;1009;289;188;291;397	1	78	0	30.615	8.5	8.6	5.8	1066100000	93283000	106270000	59014000	3	3	3	33
M0R2F1;O15554	M0R2F1;O15554	1;1	1;1	1;1	0	7708300	0	Intermediate conductance calcium-activated potassium channel protein 4	KCNN4	;	2	1	1	1	1	1	0	1	1	0	1	1	0	21.1	21.1	21.1	6.0952	57	57;427	1	4	0.0080682	1.8038	21.1	21.1	0	26631000	7909900	8660900	0	0	0	0	0
M0R300;M0R0P8;Q13459-2;Q13459;M0QZY4	M0R300;M0R0P8;Q13459-2;Q13459;M0QZY4	2;2;2;2;1	2;2;2;2;1	2;2;2;2;1	13725000	11852000	0	Unconventional myosin-IXb	MYO9B	;;;;	5	2	2	2	2	2	0	2	2	0	2	2	0	1.4	1.4	1.4	234.07	2071	2071;2157;2022;2157;154	1	9	0.00698	1.909	1.4	1.4	0	46809000	17673000	13698000	0	1	1	0	5
M0R3A8;M0R1R3;Q9NWS0-2	M0R3A8;M0R1R3;Q9NWS0-2	2;1;1	1;1;1	1;1;1	0	0	115120000	PIH1 domain-containing protein 1	PIH1D1	;;	3	2	1	1	2	2	2	1	1	1	1	1	1	29.6	8.7	8.7	12.517	115	115;95;180	1	12	0.0051826	2.005	29.6	29.6	29.6	1533900000	160820000	126500000	102390000	0	0	1	3
M0R3D4;Q9UI14;M0QXH1;M0R1H9	M0R3D4;Q9UI14;M0QXH1;M0R1H9	2;2;1;1	2;2;1;1	2;2;1;1	61520000	75843000	69836000	Prenylated Rab acceptor protein 1	RABAC1	;;;	4	2	2	2	2	2	2	2	2	2	2	2	2	19.2	19.2	19.2	17.056	151	151;185;109;149	1	21	0	20.243	19.2	19.2	19.2	535840000	72023000	81313000	68246000	1	2	1	14
O00116;B8ZZ81	O00116	23;5	23;5	23;5	990640000	939230000	1040600000	Alkyldihydroxyacetonephosphate synthase, peroxisomal	AGPS		2	23	23	23	20	20	19	20	20	19	20	20	19	49.7	49.7	49.7	72.911	658	658;189	1	301	0	171.3	39.5	44.5	43.5	11724000000	955600000	1098500000	937610000	13	17	12	158
O00139-2;O00139-1;O00139-5;O00139;O00139-4;D6R9M0;H0Y8H2;Q8N4N8	O00139-2;O00139-1;O00139-5;O00139;O00139-4	10;10;10;10;10;2;1;1	10;10;10;10;10;2;1;1	10;10;10;10;10;2;1;1	69890000	73051000	129590000	Kinesin-like protein KIF2A	KIF2A	;;;;	8	10	10	10	7	6	7	7	6	7	7	6	7	16.7	16.7	16.7	75.042	660	660;679;686;706;744;284;130;673	1	99	0	17.921	12.1	10.2	12.1	936440000	76531000	57543000	77402000	3	2	1	34
O00148;O00148-2;B1Q2N1;K7EQN7;K7EPJ3	O00148;O00148-2;B1Q2N1	21;14;11;10;7	9;5;3;3;2	9;5;3;3;2	931470000	989340000	919450000	ATP-dependent RNA helicase DDX39A	DDX39A	;;	5	21	9	9	19	20	19	8	8	8	8	8	8	57.6	27.2	27.2	49.129	427	427;322;267;255;189	1	157	0	119.45	52.2	52.5	52.2	10840000000	1003700000	1109900000	843410000	11	12	7	112
O00151	O00151	13	13	13	638750000	597580000	539310000	PDZ and LIM domain protein 1	PDLIM1		1	13	13	13	13	12	11	13	12	11	13	12	11	63.8	63.8	63.8	36.071	329	329	1	159	0	83.219	63.8	60.5	54.4	6707000000	748700000	805460000	558760000	8	8	8	95
O00154-4;O00154-6;O00154-7;O00154;O00154-5;B4DUX0;K7EKP8;O00154-2;O00154-3;F5GWE2;Q6ZUV0	O00154-4;O00154-6;O00154-7;O00154;O00154-5;B4DUX0;K7EKP8;O00154-2;O00154-3	14;13;13;13;12;11;10;9;9;5;1	14;13;13;13;12;11;10;9;9;5;1	14;13;13;13;12;11;10;9;9;5;1	869770000	877300000	957010000	Cytosolic acyl coenzyme A thioester hydrolase	ACOT7	;;;;;;;;	11	14	14	14	12	10	12	12	10	12	12	10	12	56.5	56.5	56.5	37.419	338	338;329;370;380;350;265;279;246;283;223;252	1	208	0	122.78	47.6	38.5	46.4	10628000000	1055000000	820110000	950280000	9	7	11	109
O00161;H3BM38;O00161-2;H3BNE1;H3BR18;H3BPJ0;H3BNG6;H3BU94;H3BR99;H3BV99;H3BP15;H3BQY9	O00161;H3BM38;O00161-2;H3BNE1;H3BR18;H3BPJ0	4;3;3;2;2;2;1;1;1;1;1;1	4;3;3;2;2;2;1;1;1;1;1;1	4;3;3;2;2;2;1;1;1;1;1;1	0	0	36983000	Synaptosomal-associated protein 23;Synaptosomal-associated protein	SNAP23	;;;;;	12	4	4	4	3	2	3	3	2	3	3	2	3	21.8	21.8	21.8	23.354	211	211;125;158;97;109;127;44;53;90;142;149;154	1	22	0.00025595	2.9285	15.6	11.4	15.6	341720000	58507000	30914000	32893000	0	0	1	4
O00165-5;O00165-3;O00165;O00165-2;E9PIQ7;Q5VYD6;O00165-4	O00165-5;O00165-3;O00165;O00165-2;E9PIQ7	4;4;4;3;2;1;1	4;4;4;3;2;1;1	4;4;4;3;2;1;1	0	0	69429000	HCLS1-associated protein X-1	HAX1	;;;;	7	4	4	4	3	3	3	3	3	3	3	3	3	28.6	28.6	28.6	26.099	231	231;253;279;287;151;255;124	1	33	0	4.3514	23.8	23.8	14.7	543120000	41132000	39073000	62642000	0	1	0	4
O00170;E9PMH2;V9GYQ3	O00170;E9PMH2	14;10;4	14;10;4	14;10;4	362610000	395540000	380370000	AH receptor-interacting protein	AIP	;	3	14	14	14	13	12	11	13	12	11	13	12	11	58.5	58.5	58.5	37.636	330	330;232;188	1	168	0	58.799	54.8	49.1	48.8	4258600000	307050000	471210000	352740000	8	13	6	87
O00178;F5H257;F5H716;B0QY59	O00178	7;1;1;1	7;1;1;1	7;1;1;1	89465000	78023000	79743000	GTP-binding protein 1	GTPBP1		4	7	7	7	5	4	4	5	4	4	5	4	4	17	17	17	72.453	669	669;86;152;349	1	54	0	25.098	11.2	9.1	9.9	917480000	120920000	76808000	80159000	3	3	3	24
O00180;Q5T5E7	O00180	3;1	3;1	3;1	0	0	51108000	Potassium channel subfamily K member 1	KCNK1		2	3	3	3	1	0	2	1	0	2	1	0	2	15.2	15.2	15.2	38.143	336	336;220	1	17	0	18.191	5.7	0	11.6	889690000	119120000	0	45456000	1	0	0	7
O00186	O00186	11	11	11	278860000	256550000	244210000	Syntaxin-binding protein 3	STXBP3		1	11	11	11	10	9	10	10	9	10	10	9	10	26.7	26.7	26.7	67.764	592	592	1	148	0	25.501	20.9	18.1	20.9	3060200000	299330000	268880000	218170000	8	3	6	63
O00194;K7ES41;H3BU81;H3BUD9;H3BS49;H3BVH7;H3BN55;P51159-2;P51159	O00194	5;2;1;1;1;1;1;1;1	5;2;1;1;1;1;1;1;1	5;2;1;1;1;1;1;1;1	156850000	164020000	149480000	Ras-related protein Rab-27B	RAB27B		9	5	5	5	5	4	5	5	4	5	5	4	5	27.1	27.1	27.1	24.608	218	218;87;71;95;136;146;185;213;221	1	60	0	11.937	27.1	23.9	27.1	1628100000	176730000	192010000	163730000	3	3	0	17
O00203-3;O00203;Q13367;Q13367-4;Q13367-3;F5GYB0;H0YBD0;F5GWU4	O00203-3;O00203	23;23;4;4;3;1;1;1	23;23;4;4;3;1;1;1	23;23;4;4;3;1;1;1	490850000	465920000	529810000	AP-3 complex subunit beta-1	AP3B1	;	8	23	23	23	17	17	18	17	17	18	17	17	18	26.5	26.5	26.5	116.19	1045	1045;1094;1082;1101;1050;141;154;193	1	216	0	83.119	19.4	18.7	20.9	5948600000	806730000	565440000	366000000	8	6	7	88
O00231;O00231-2;J3QRY4;J3QS13;J3KSW3	O00231;O00231-2	22;21;7;5;1	22;21;7;5;1	22;21;7;5;1	1985100000	2045400000	1966600000	26S proteasome non-ATPase regulatory subunit 11	PSMD11	;	5	22	22	22	20	21	20	20	21	20	20	21	20	62.3	62.3	62.3	47.463	422	422;423;187;90;45	1	346	0	172.13	58.5	61.6	59.7	24851000000	2169400000	2314300000	1741500000	19	25	17	229
O00232;O00232-2;J3KTJ5;J3KSK1	O00232;O00232-2	23;21;1;1	23;21;1;1	23;21;1;1	1141900000	1183900000	1154200000	26S proteasome non-ATPase regulatory subunit 12	PSMD12	;	4	23	23	23	21	20	18	21	20	18	21	20	18	59.4	59.4	59.4	52.904	456	456;436;38;42	1	292	0	161.34	55.5	51.3	46.5	14140000000	1184200000	1405700000	1045000000	17	17	12	174
O00233;J3KN29;F5H5V4;F5GX23;F8W7V8;O00233-2;F5H7X1;O00233-3;F5H169	O00233;J3KN29;F5H5V4;F5GX23;F8W7V8;O00233-2;F5H7X1	7;6;5;5;5;5;4;3;2	7;6;5;5;5;5;4;3;2	7;6;5;5;5;5;4;3;2	275830000	269560000	371730000	26S proteasome non-ATPase regulatory subunit 9	PSMD9	;;;;;;	9	7	7	7	4	6	7	4	6	7	4	6	7	34.5	34.5	34.5	24.682	223	223;222;153;179;207;209;85;118;128	1	98	0	26.593	21.5	30.5	34.5	3391000000	233650000	327770000	311910000	3	3	4	43
O00264;O00264-2	O00264;O00264-2	7;4	6;4	6;4	588380000	696810000	630850000	Membrane-associated progesterone receptor component 1	PGRMC1	;	2	7	6	6	7	7	7	6	6	6	6	6	6	41.5	36.9	36.9	21.671	195	195;143	1	88	0	27.306	41.5	41.5	41.5	7370000000	616160000	707150000	581140000	4	6	4	54
O00267-2;O00267;M0QYL9	O00267-2;O00267	24;24;1	24;24;1	24;24;1	608350000	612700000	563030000	Transcription elongation factor SPT5	SUPT5H	;	3	24	24	24	18	19	19	18	19	19	18	19	19	31.4	31.4	31.4	120.5	1083	1083;1087;164	1	277	0	127.82	24.5	27.5	26.4	7202200000	647840000	727420000	470920000	9	12	14	150
O00273;O00273-2;K7ERT1	O00273;O00273-2	6;5;2	6;5;2	6;5;2	89587000	81788000	101940000	DNA fragmentation factor subunit alpha	DFFA	;	3	6	6	6	6	6	4	6	6	4	6	6	4	22.1	22.1	22.1	36.521	331	331;268;159	1	63	0	29.002	22.1	22.1	15.1	926720000	112680000	102230000	67417000	1	2	2	28
O00299	O00299	14	14	14	5918000000	6066200000	6977200000	Chloride intracellular channel protein 1	CLIC1		1	14	14	14	13	14	14	13	14	14	13	14	14	77.6	77.6	77.6	26.922	241	241	1	290	0	200.44	73.9	77.6	77.6	74872000000	6135900000	6513800000	6343700000	27	27	24	286
O00330-3;O00330;H0YD97;O00330-2;E9PLU0;E9PRI6	O00330-3;O00330;H0YD97;O00330-2	4;4;2;2;1;1	4;4;2;2;1;1	4;4;2;2;1;1	46286000	51261000	65150000	Pyruvate dehydrogenase protein X component, mitochondrial	PDHX	;;;	6	4	4	4	4	4	4	4	4	4	4	4	4	12.8	12.8	12.8	51.459	486	486;501;189;274;151;182	1	45	0	7.9362	12.8	12.8	12.8	633640000	51260000	62980000	56166000	1	1	2	27
O00399;E5RK00;E5RIK5;E5RGW9;E5RFU3	O00399;E5RK00	4;2;1;1;1	4;2;1;1;1	4;2;1;1;1	70197000	55078000	0	Dynactin subunit 6	DCTN6	;	5	4	4	4	2	3	2	2	3	2	2	3	2	26.8	26.8	26.8	20.747	190	190;170;37;46;73	1	27	0	7.8355	14.2	19.5	16.8	595080000	54121000	49779000	30862000	2	2	0	13
O00400;H7C562	O00400	3;1	3;1	3;1	21832000	0	0	Acetyl-coenzyme A transporter 1	SLC33A1		2	3	3	3	2	1	2	2	1	2	2	1	2	6.4	6.4	6.4	60.908	549	549;269	1	15	0	5.146	4.9	2.4	3.8	205340000	23788000	15241000	11310000	1	0	1	11
O00401	O00401	3	3	3	48494000	43562000	48890000	Neural Wiskott-Aldrich syndrome protein	WASL		1	3	3	3	2	2	2	2	2	2	2	2	2	11.5	11.5	11.5	54.826	505	505	1	27	0	6.9268	9.9	9.9	9.9	518550000	48295000	45220000	43355000	0	0	1	11
O00410;O00410-3;H0Y8C6;O00410-2;B4E0R6;E7ETV3;C9JMV5;E7EQT5;E7EV12;H0Y3V4;E7EWK4;E7EX05;C9JZD8;C9JQT6;E7ESA1;E7ESZ1;E7ETV8;C9JZ53;C9J875;C9JXE0	O00410;O00410-3;H0Y8C6;O00410-2;B4E0R6	48;48;46;43;40;10;9;8;8;8;6;6;5;5;5;5;5;4;3;2	48;48;46;43;40;10;9;8;8;8;6;6;5;5;5;5;5;4;3;2	46;46;44;41;38;10;9;8;8;8;6;6;5;5;5;5;5;4;3;2	4995100000	4520900000	4481000000	Importin-5	IPO5	;;;;	20	48	48	46	44	44	40	44	44	40	43	43	38	61.8	61.8	60.1	123.63	1097	1097;1115;1099;1037;972;170;165;126;142;182;117;119;74;88;98;106;128;77;75;64	1	800	0	323.31	56.9	56.4	48.7	54628000000	5398800000	5041300000	3506500000	45	50	42	520
O00411;K7EMH3	O00411	3;1	3;1	3;1	15705000	22655000	0	DNA-directed RNA polymerase, mitochondrial	POLRMT		2	3	3	3	2	3	0	2	3	0	2	3	0	3.5	3.5	3.5	138.62	1230	1230;349	1	17	0.0012604	2.7481	2.8	3.5	0	185600000	18201000	22109000	0	1	2	0	9
O00425;O00425-2;F8WD15	O00425	20;8;4	20;8;4	18;7;4	720210000	775650000	814920000	Insulin-like growth factor 2 mRNA-binding protein 3	IGF2BP3		3	20	20	18	16	17	14	16	17	14	14	15	12	42.7	42.7	38.7	63.704	579	579;198;81	1	251	0	151.29	34.5	35.9	32.1	9262100000	780820000	872390000	713070000	11	11	12	133
O00429-4;O00429-2;G8JLD5;O00429-5;O00429-3;O00429;O00429-8;O00429-6;O00429-7;F8VZ52;F8W1W3;B4DDQ3;B4DPZ9;F8VUJ9;F8VR28;F8VYL3;H0YHY4;H0YI79	O00429-4;O00429-2;G8JLD5;O00429-5;O00429-3;O00429;O00429-8;O00429-6;O00429-7	34;34;33;33;33;33;33;32;19;14;9;9;8;7;4;4;3;1	34;34;33;33;33;33;33;32;19;14;9;9;8;7;4;4;3;1	34;34;33;33;33;33;33;32;19;14;9;9;8;7;4;4;3;1	1147500000	1116500000	1035900000	Dynamin-1-like protein	DNM1L	;;;;;;;;	18	34	34	34	28	27	25	28	27	25	28	27	25	61.7	61.7	61.7	78.099	699	699;725;712;710;710;736;738;749;533;261;168;180;156;172;97;117;54;48	1	424	0	212.95	51.1	47.1	44.2	13331000000	1131600000	1332900000	890170000	17	15	16	172
O00442;O00442-2;A6NIC1	O00442;O00442-2	10;9;1	10;9;1	10;9;1	242230000	192480000	225300000	RNA 3-terminal phosphate cyclase	RTCA	;	3	10	10	10	5	6	6	5	6	6	5	6	6	34.2	34.2	34.2	39.336	366	366;379;49	1	99	0	31.612	19.4	20.8	21.6	2456300000	157040000	170270000	231040000	2	2	4	37
O00461;F8W785	O00461;F8W785	7;6	7;6	7;6	117450000	128520000	93304000	Golgi integral membrane protein 4	GOLIM4	;	2	7	7	7	5	7	3	5	7	3	5	7	3	11.9	11.9	11.9	81.879	696	696;668	1	83	0	22.203	7.6	11.9	4.9	1619400000	164000000	170050000	74960000	2	1	3	33
O00468-6;O00468-3;O00468-7;O00468-5;O00468-4;O00468;O00468-2;H0Y5U1	O00468-6;O00468-3;O00468-7;O00468-5;O00468-4;O00468;O00468-2	13;12;12;11;11;11;10;1	13;12;12;11;11;11;10;1	13;12;12;11;11;11;10;1	96282000	90864000	98608000	Agrin;Agrin N-terminal 110 kDa subunit;Agrin C-terminal 110 kDa subunit;Agrin C-terminal 90 kDa fragment;Agrin C-terminal 22 kDa fragment	AGRN	;;;;;;	8	13	13	13	6	4	4	6	4	4	6	4	4	9.1	9.1	9.1	214.84	2045	2045;2049;2063;2057;2059;2067;1963;271	1	82	0	23.514	4	3.2	2.8	1152800000	80038000	64164000	54045000	3	4	2	33
O00469;O00469-2;E7ETU9;B3KWS3;C9JXZ0;F8WEW3	O00469;O00469-2;E7ETU9;B3KWS3	13;13;12;7;4;1	13;13;12;7;4;1	13;13;12;7;4;1	338450000	352220000	352200000	Procollagen-lysine,2-oxoglutarate 5-dioxygenase 2	PLOD2	;;;	6	13	13	13	10	12	10	10	12	10	10	12	10	21.3	21.3	21.3	84.685	737	737;758;703;418;229;98	1	181	0	44.012	15.5	20.1	15.9	4107800000	356290000	379590000	293160000	7	8	5	76
O00471	O00471	9	9	1	80462000	78791000	67882000	Exocyst complex component 5	EXOC5		1	9	9	1	6	6	7	6	6	7	0	0	0	18.1	18.1	2.1	81.852	708	708	1	69	0	18.567	12.3	12.1	14.7	1001400000	79646000	97611000	78583000	3	3	2	30
O00483	O00483	1	1	1	0	0	56573000	Cytochrome c oxidase subunit NDUFA4	NDUFA4		1	1	1	1	0	1	1	0	1	1	0	1	1	14.8	14.8	14.8	9.3697	81	81	1	10	0.000257	3.0022	0	14.8	14.8	442920000	0	58691000	50317000	0	1	2	8
O00487	O00487	11	11	11	628840000	679370000	673760000	26S proteasome non-ATPase regulatory subunit 14	PSMD14		1	11	11	11	9	9	9	9	9	9	9	9	9	44.8	44.8	44.8	34.577	310	310	1	159	0	63.232	38.1	38.1	42.6	7447100000	535610000	741320000	571030000	7	10	8	96
O00488	O00488	1	1	1	0	7042800	0	Zinc finger protein 593	ZNF593		1	1	1	1	0	1	0	0	1	0	0	1	0	10.4	10.4	10.4	15.199	134	134	1	4	0.0042745	2.0967	0	10.4	0	28393000	0	7913200	0	0	1	0	3
O00499-9;O00499-10;O00499-7;O00499-8;O00499-4;O00499-6;O00499-11;O00499-3;O00499-2;O00499-5;O00499;S4R418;F5H0W4;F5H533;Q9UBW5-2;Q9UBW5;P49418-2;P49418	O00499-9;O00499-10;O00499-7;O00499-8;O00499-4;O00499-6;O00499-11;O00499-3;O00499-2;O00499-5;O00499	12;12;12;12;12;12;12;12;12;12;12;1;1;1;1;1;1;1	12;12;12;12;12;12;12;12;12;12;12;1;1;1;1;1;1;1	12;12;12;12;12;12;12;12;12;12;12;1;1;1;1;1;1;1	282050000	283050000	299870000	Myc box-dependent-interacting protein 1	BIN1	;;;;;;;;;;	18	12	12	12	7	10	8	7	10	8	7	10	8	45.5	45.5	45.5	45.563	409	409;424;439;454;475;482;497;506;518;550;593;531;539;653;533;565;653;695	1	131	0	50.903	25.7	38.1	32	3505100000	279900000	356080000	200950000	5	12	6	70
O00505;H0Y4S9	O00505	7;1	5;1	5;1	151720000	150730000	180440000	Importin subunit alpha-4	KPNA3		2	7	5	5	5	7	6	3	5	4	3	5	4	21.9	17.5	17.5	57.81	521	521;91	1	54	0	7.6595	15.2	21.9	17.1	1642900000	142730000	205020000	159480000	2	6	3	22
O00507;O00507-2	O00507;O00507-2	20;17	2;1	2;1	0	38434000	0	Probable ubiquitin carboxyl-terminal hydrolase FAF-Y	USP9Y	;	2	20	2	2	16	14	13	1	2	2	1	2	2	9.2	1.3	1.3	291.07	2555	2555;2070	1	16	0.0022272	2.5646	6.9	6.2	6.4	287770000	21258000	44903000	18942000	0	1	0	2
O00560;O00560-3;B4DHN5;E9PBU7	O00560;O00560-3;B4DHN5;E9PBU7	10;9;7;7	10;9;7;7	1;1;0;0	814010000	814790000	700670000	Syntenin-1	SDCBP	;;;	4	10	10	1	9	9	9	9	9	9	1	1	1	57.7	57.7	6	32.444	298	298;292;239;244	1	174	0	163.91	46.3	54.4	54.4	8669600000	864920000	855060000	629970000	12	10	10	123
O00560-2;G5EA09	O00560-2;G5EA09	10;9	1;1	1;1	0	0	58534000	Syntenin-1	SDCBP	;	2	10	1	1	9	9	9	1	1	1	1	1	1	57.6	5.7	5.7	32.316	297	297;318	1	12	0.0051716	1.9938	46.1	54.2	54.2	533980000	49164000	57168000	52061000	0	0	0	0
O00571;O00571-2;B4E3C4;B4DLA0	O00571;O00571-2	34;33;7;5	34;33;7;5	10;9;3;4	3202200000	3305000000	3373000000	ATP-dependent RNA helicase DDX3X	DDX3X	;	4	34	34	10	30	33	32	30	33	32	7	10	9	60.4	60.4	19.3	73.243	662	662;646;308;139	1	593	0	308.89	53.9	60.4	53.6	39020000000	2990600000	3943000000	3186200000	25	30	27	309
O00622	O00622	6	6	6	185090000	177410000	128360000	Protein CYR61	CYR61		1	6	6	6	5	6	4	5	6	4	5	6	4	19.2	19.2	19.2	42.026	381	381	1	68	0	19.77	16.5	19.2	13.9	1652400000	218240000	245430000	120280000	4	3	0	18
O00625	O00625	10	10	10	771090000	617970000	947730000	Pirin	PIR		1	10	10	10	10	9	8	10	9	8	10	9	8	54.8	54.8	54.8	32.113	290	290	1	142	0	36.205	54.8	50.3	37.6	8664200000	1019600000	569590000	549150000	6	6	5	70
O00629;H7C4F6	O00629	9;3	9;3	7;3	649220000	637320000	582140000	Importin subunit alpha-3	KPNA4		2	9	9	7	8	9	8	8	9	8	6	7	6	31.7	31.7	27.3	57.886	521	521;170	1	105	0	41.044	26.1	31.7	28.4	7845300000	561370000	1854900000	382420000	9	8	7	66
O00743;O00743-2;O00743-3;B7Z3E2;Q5T1S7	O00743;O00743-2;O00743-3;B7Z3E2	12;11;11;7;2	12;11;11;7;2	12;11;11;7;2	361600000	345000000	422860000	Serine/threonine-protein phosphatase 6 catalytic subunit;Serine/threonine-protein phosphatase 6 catalytic subunit, N-terminally processed	PPP6C	;;;	5	12	12	12	10	11	10	10	11	10	10	11	10	48.5	48.5	48.5	35.144	305	305;283;342;158;125	1	141	0	84.145	43.6	46.2	41	4235500000	412930000	442810000	354530000	11	6	7	91
O00762;O00762-2;O00762-3;K4DI81;O00762-4	O00762;O00762-2;O00762-3	4;3;3;1;1	4;3;3;1;1	4;3;3;1;1	0	0	71028000	Ubiquitin-conjugating enzyme E2 C	UBE2C	;;	5	4	4	4	1	2	2	1	2	2	1	2	2	37.4	37.4	37.4	19.652	179	179;140;150;50;161	1	27	0	10.933	12.3	19	15.6	535700000	20017000	43195000	48758000	0	2	2	11
O00764;F2Z2Y4;O00764-3;O00764-2;A8MV33	O00764;F2Z2Y4;O00764-3;O00764-2	16;14;13;12;1	16;14;13;12;1	16;14;13;12;1	994660000	917500000	997540000	Pyridoxal kinase	PDXK	;;;	5	16	16	16	11	12	9	11	12	9	11	12	9	63.1	63.1	63.1	35.102	312	312;272;239;284;87	1	178	0	140.38	45.2	48.7	28.2	11091000000	1086800000	934500000	696020000	8	12	11	120
O00767	O00767	5	5	5	198330000	199540000	221730000	Acyl-CoA desaturase	SCD		1	5	5	5	5	4	3	5	4	3	5	4	3	17.8	17.8	17.8	41.522	359	359	1	56	0	12.102	17.8	14.2	14.2	2737400000	267800000	320060000	245980000	2	2	3	32
O14548;E5RJZ1;H0YBD2	O14548;E5RJZ1;H0YBD2	3;2;2	3;2;2	3;2;2	42628000	81595000	80265000	Cytochrome c oxidase subunit 7A-related protein, mitochondrial	COX7A2L	;;	3	3	3	3	3	3	3	3	3	3	3	3	3	48.2	48.2	48.2	12.615	114	114;79;95	1	32	0	7.4104	48.2	48.2	48.2	807560000	52086000	97087000	76566000	1	3	3	21
O14561;I3L505;H3BNK3	O14561;I3L505;H3BNK3	4;2;2	4;2;2	4;2;2	374630000	315150000	361500000	Acyl carrier protein, mitochondrial;Acyl carrier protein	NDUFAB1	;;	3	4	4	4	4	4	4	4	4	4	4	4	4	21.2	21.2	21.2	17.417	156	156;70;111	1	67	0	14.914	21.2	21.2	21.2	4292200000	446250000	445800000	248510000	2	2	4	33
O14579;M0QXB4;O14579-3;O14579-2;M0R061	O14579;M0QXB4;O14579-3;O14579-2;M0R061	10;9;8;8;5	10;9;8;8;5	10;9;8;8;5	701970000	766950000	789000000	Coatomer subunit epsilon	COPE	;;;;	5	10	10	10	10	9	9	10	9	9	10	9	9	44.5	44.5	44.5	34.482	308	308;331;256;257;146	1	190	0	160.78	44.5	39.9	39.9	9271000000	866590000	855490000	709660000	11	14	11	147
O14613	O14613	3	3	3	39256000	47051000	0	Cdc42 effector protein 2	CDC42EP2		1	3	3	3	3	3	1	3	3	1	3	3	1	29.5	29.5	29.5	22.483	210	210	1	14	0	26.499	29.5	29.5	12.4	224810000	46744000	48672000	22608000	2	2	1	9
O14617-4;O14617;O14617-5;G5E988;O14617-2;E7EMM2;O14617-3;K7ELX8;K7ERW8	O14617-4;O14617;O14617-5;G5E988;O14617-2;E7EMM2;O14617-3	27;27;27;21;21;19;19;3;2	27;27;27;21;21;19;19;3;2	27;27;27;21;21;19;19;3;2	443480000	412090000	445580000	AP-3 complex subunit delta-1	AP3D1	;;;;;;	9	27	27	27	20	22	18	20	22	18	20	22	18	37.1	37.1	37.1	114.71	1021	1021;1153;1215;1112;1112;984;984;193;155	1	251	0	81.593	26	30	24.4	5301100000	436270000	489180000	444000000	13	14	9	123
O14646-2;O14646;H3BTW3	O14646-2;O14646	5;5;1	5;5;1	2;2;0	32257000	39017000	32222000	Chromodomain-helicase-DNA-binding protein 1	CHD1	;	3	5	5	2	3	3	3	3	3	3	1	0	0	3.2	3.2	1.3	196.59	1709	1709;1710;1098	1	37	0	6.0905	1.9	1.9	1.9	328240000	28999000	43138000	30589000	2	3	1	22
O14656;O14656-2	O14656;O14656-2	6;3	6;3	6;3	98440000	98358000	87356000	Torsin-1A	TOR1A	;	2	6	6	6	4	4	5	4	4	5	4	4	5	18.7	18.7	18.7	37.808	332	332;197	1	48	0	9.1733	11.7	11.7	18.1	1115200000	96005000	100150000	111080000	2	2	2	20
O14657;H0Y7C8	O14657;H0Y7C8	4;2	4;2	4;2	213990000	66713000	131420000	Torsin-1B	TOR1B	;	2	4	4	4	4	4	4	4	4	4	4	4	4	14.3	14.3	14.3	37.978	336	336;141	1	50	0	30.05	14.3	14.3	14.3	1813200000	253880000	81758000	118500000	1	1	2	17
O14672;H0YK87;C9J9B4;B4DU28	O14672	6;2;2;1	6;2;2;1	6;2;2;1	45283000	57110000	0	Disintegrin and metalloproteinase domain-containing protein 10	ADAM10		4	6	6	6	4	4	2	4	4	2	4	4	2	12.8	12.8	12.8	84.141	748	748;115;125;447	1	43	0	15.266	7	9.2	3.5	577960000	38803000	73912000	50385000	1	2	1	19
O14684	O14684	6	6	6	2177800000	1746100000	1628100000	Prostaglandin E synthase	PTGES		1	6	6	6	5	5	5	5	5	5	5	5	5	31.6	31.6	31.6	17.102	152	152	1	89	0	25.453	23.7	23.7	23.7	23015000000	2121600000	1852400000	1365000000	7	6	6	73
O14737;B4DE64;K7EQA1;K7ESJ4;Q3HM38;X6R2P6	O14737;B4DE64;K7EQA1	9;7;6;4;3;3	9;7;6;4;3;3	9;7;6;4;3;3	941440000	963970000	888430000	Programmed cell death protein 5	PDCD5	;;	6	9	9	9	8	9	8	8	9	8	8	9	8	69.6	69.6	69.6	14.285	125	125;129;87;65;40;55	1	133	0	42.604	69.6	69.6	69.6	11649000000	1006600000	849350000	822540000	7	4	6	77
O14744-5;O14744;O14744-3;O14744-2;B4DV00;O14744-4;G3V580;H0YJX6;G3V2X6;C9JSX3;G3V5L5;G3V2L6;H0YJ77;H0YJD3;H7BZ44;G3V507;G3V2F5;G3V5T6	O14744-5;O14744;O14744-3;O14744-2;B4DV00;O14744-4	17;17;15;15;13;10;8;7;6;5;4;4;3;3;3;2;2;1	17;17;15;15;13;10;8;7;6;5;4;4;3;3;3;2;2;1	17;17;15;15;13;10;8;7;6;5;4;4;3;3;3;2;2;1	808180000	760090000	787630000	Protein arginine N-methyltransferase 5;Protein arginine N-methyltransferase 5, N-terminally processed;Protein arginine N-methyltransferase 5	PRMT5	;;;;;	18	17	17	17	13	15	13	13	15	13	13	15	13	43.3	43.3	43.3	67.673	593	593;637;576;620;531;466;180;279;185;186;169;183;138;177;179;42;86;104	1	214	0	91.35	28.5	35.8	30.5	9499100000	756470000	907390000	696780000	9	9	11	134
O14745;J3QRP6;B3KY21;J3QRA3	O14745;J3QRP6;B3KY21	14;9;8;1	14;9;8;1	14;9;8;1	637360000	750170000	723160000	Na(+)/H(+) exchange regulatory cofactor NHE-RF1	SLC9A3R1	;;	4	14	14	14	11	10	7	11	10	7	11	10	7	54.5	54.5	54.5	38.868	358	358;215;202;35	1	168	0	101.24	44.7	39.7	26	9128700000	815380000	935150000	600300000	9	10	8	99
O14773;O14773-2;E7EV34	O14773;O14773-2	8;7;1	8;7;1	8;7;1	157270000	136500000	153920000	Tripeptidyl-peptidase 1	TPP1	;	3	8	8	8	5	5	6	5	5	6	5	5	6	19.5	19.5	19.5	61.247	563	563;320;177	1	74	0	14.436	12.8	12.1	14	2004700000	171680000	161290000	143000000	1	2	2	30
O14776-2;O14776;G3V220	O14776-2;O14776;G3V220	15;15;12	15;15;12	15;15;12	295160000	294950000	364970000	Transcription elongation regulator 1	TCERG1	;;	3	15	15	15	11	12	13	11	12	13	11	12	13	16.4	16.4	16.4	121.69	1077	1077;1098;1032	1	146	0	29.133	12.8	13.6	14.9	3706900000	278040000	375060000	360430000	8	7	10	75
O14787-2;O14787;K7ENW1;K7ESC1	O14787-2;O14787	13;12;3;3	4;4;0;0	4;4;0;0	59552000	0	0	Transportin-2	TNPO2	;	4	13	4	4	10	9	11	2	1	2	2	1	2	15.9	6.3	6.3	100.41	887	887;897;85;109	1	24	0.0051801	2.0028	10.5	9.7	13.1	408840000	65362000	42991000	58906000	1	0	1	3
O14818;O14818-2;H0Y586;O14818-4;Q8TAA3-2;Q8TAA3-5;Q8TAA3;F5GY34	O14818;O14818-2;H0Y586;O14818-4	16;9;8;8;5;5;5;2	16;9;8;8;5;5;5;2	16;9;8;8;5;5;5;2	2925000000	3036900000	3028800000	Proteasome subunit alpha type-7	PSMA7	;;;	8	16	16	16	16	16	15	16	16	15	16	16	15	67.3	67.3	67.3	27.887	248	248;178;187;149;212;250;256;63	1	285	0	214.42	67.3	67.3	64.1	36911000000	3024200000	3449300000	2742800000	15	18	18	191
O14828;O14828-2	O14828	7;3	7;3	7;3	461450000	557160000	523060000	Secretory carrier-associated membrane protein 3	SCAMP3		2	7	7	7	6	7	6	6	7	6	6	7	6	32.6	32.6	32.6	38.287	347	347;321	1	113	0	109.68	32.6	32.6	25.1	6161500000	344590000	647600000	557400000	2	7	6	51
O14879	O14879	25	25	25	6187300000	6637200000	6841100000	Interferon-induced protein with tetratricopeptide repeats 3	IFIT3		1	25	25	25	22	22	23	22	22	23	22	22	23	69	69	69	55.984	490	490	1	434	0	323.31	63.5	59.4	65.5	76941000000	6045500000	8118500000	5960900000	24	26	26	306
O14907	O14907	3	3	3	35942000	0	95405000	Tax1-binding protein 3	TAX1BP3		1	3	3	3	3	1	2	3	1	2	3	1	2	39.5	39.5	39.5	13.735	124	124	1	16	0	6.5342	39.5	11.3	25	439090000	66685000	33294000	59802000	1	1	2	6
O14908;O14908-2;K7EM11;K7ELJ2;K7ESN1	O14908;O14908-2;K7EM11	8;5;4;1;1	8;5;4;1;1	7;4;3;1;1	287480000	294250000	227350000	PDZ domain-containing protein GIPC1	GIPC1	;;	5	8	8	7	8	8	7	8	8	7	7	7	6	36.9	36.9	33.3	36.049	333	333;236;128;40;159	1	105	0	22.629	36.9	36.9	34.2	3320100000	344540000	372750000	241890000	4	5	2	42
O14929;O14929-2;F8W9G7;F8WEW1	O14929;O14929-2	15;11;3;2	15;11;3;2	15;11;3;2	464060000	483760000	463870000	Histone acetyltransferase type B catalytic subunit	HAT1	;	4	15	15	15	14	11	10	14	11	10	14	11	10	59.7	59.7	59.7	49.512	419	419;334;125;46	1	152	0	133.65	57.3	44.4	37	5654700000	593130000	565560000	390830000	8	12	9	90
O14933;O14933-2;E9PQT7;E9PKW8	O14933;O14933-2	6;4;2;1	6;4;2;1	6;4;2;1	277670000	296540000	313750000	Ubiquitin/ISG15-conjugating enzyme E2 L6	UBE2L6	;	4	6	6	6	6	6	5	6	6	5	6	6	5	49	49	49	17.769	153	153;87;127;65	1	94	0	45.832	49	49	48.4	3393700000	252250000	356240000	331690000	4	4	3	48
O14949	O14949	5	5	5	208470000	243100000	237160000	Cytochrome b-c1 complex subunit 8	UQCRQ		1	5	5	5	4	3	3	4	3	3	4	3	3	54.9	54.9	54.9	9.9062	82	82	1	54	0	8.3832	45.1	32.9	26.8	2815800000	187580000	279680000	164140000	1	2	2	32
O14964;O14964-2;I3L1P5;I3L2H4;I3L165;I3L1E3	O14964;O14964-2;I3L1P5	8;7;5;2;2;2	8;7;5;2;2;2	8;7;5;2;2;2	242340000	215940000	160770000	Hepatocyte growth factor-regulated tyrosine kinase substrate	HGS	;;	6	8	8	8	7	8	7	7	8	7	7	8	7	12	12	12	86.191	777	777;690;263;59;71;292	1	91	0	21.236	8.6	12	10.9	2427800000	274040000	273410000	156650000	5	6	5	46
O14967;D6RAZ4	O14967	11;4	11;4	11;4	231840000	213310000	217550000	Calmegin	CLGN		2	11	11	11	8	10	8	8	10	8	8	10	8	30.7	30.7	30.7	70.038	610	610;179	1	100	0	42.895	20.7	28.4	21.6	2514000000	267150000	290490000	209930000	5	7	4	40
O14974;O14974-4;O14974-5;O14974-3;O14974-2;F8VZN8;H0YHI8;H0YIS3;H0YIS4;H0YIM2;H0YHL8;F8VW28;H0YIL7	O14974;O14974-4;O14974-5;O14974-3;O14974-2;F8VZN8	17;16;15;15;15;11;7;5;5;4;2;1;1	17;16;15;15;15;11;7;5;5;4;2;1;1	17;16;15;15;15;11;7;5;5;4;2;1;1	285280000	274340000	237590000	Protein phosphatase 1 regulatory subunit 12A	PPP1R12A	;;;;;	13	17	17	17	11	12	10	11	12	10	11	12	10	20.6	20.6	20.6	115.28	1030	1030;971;943;974;995;692;367;234;299;188;210;97;161	1	156	0	32.374	14.6	15.6	12.1	3113100000	267810000	278350000	175770000	2	5	4	48
O14976-2;O14976;D6RAW3;H0Y8H5	O14976-2;O14976	6;6;2;1	6;6;2;1	6;6;2;1	33795000	30781000	30170000	Cyclin-G-associated kinase	GAK	;	4	6	6	6	4	3	3	4	3	3	4	3	3	6.7	6.7	6.7	134.46	1232	1232;1311;138;467	1	39	0	10.841	4.3	3	2.9	406500000	38722000	29680000	30136000	3	0	0	14
O14979-3;O14979-2;O14979	O14979-3;O14979-2;O14979	9;9;8	8;8;7	8;8;7	376540000	411900000	402960000	Heterogeneous nuclear ribonucleoprotein D-like	HNRNPDL	;;	3	9	8	8	9	9	8	8	8	7	8	8	7	40.2	36.9	36.9	27.191	244	244;301;420	1	98	0	64.364	40.2	40.2	40.2	4659800000	460990000	487880000	351840000	7	7	6	61
O14980;C9JKM9;C9J673;C9IZS4;C9JQ02;C9JV99;F8WF71;C9IYM2;H7BZC5;C9JF49	O14980	40;11;9;6;6;6;5;4;4;3	40;11;9;6;6;6;5;4;4;3	40;11;9;6;6;6;5;4;4;3	4073800000	3598300000	3870700000	Exportin-1	XPO1		10	40	40	40	39	36	36	39	36	36	39	36	36	47.2	47.2	47.2	123.38	1071	1071;179;132;94;95;100;82;62;72;59	1	719	0	323.31	45.5	41.9	41.7	44845000000	4414300000	4236500000	3407700000	41	40	37	484
O15031;E2PU09;A6QRG9;A6QRH1;H0Y7X5;H0Y6J7;H0YAM9;F5H3A2;B4DHQ7;O60486;Q9Y4D7	O15031	32;7;5;2;1;1;1;1;1;1;1	32;7;5;2;1;1;1;1;1;1;1	32;7;5;2;1;1;1;1;1;1;1	490940000	482700000	506490000	Plexin-B2	PLXNB2		11	32	32	32	25	23	22	25	23	22	25	23	22	26.6	26.6	26.6	205.12	1838	1838;477;234;161;84;189;231;307;615;1568;1925	1	321	0	110.74	19.8	19.1	17	5930300000	524790000	507570000	350250000	13	13	15	163
O15042-2;O15042;E7ET15;O15042-3;C9JB80;E7EW00;H0Y8D9;U3KPT1;C9JDJ7;C9J5L1;H7C4V2;H7C4P4	O15042-2;O15042;E7ET15;O15042-3;C9JB80	9;9;8;6;5;3;3;2;2;2;2;1	9;9;8;6;5;3;3;2;2;2;2;1	9;9;8;6;5;3;3;2;2;2;2;1	338580000	313600000	420450000	U2 snRNP-associated SURP motif-containing protein	U2SURP	;;;;	12	9	9	9	5	6	6	5	6	6	5	6	6	10.3	10.3	10.3	118.23	1028	1028;1029;1028;620;487;425;439;125;130;161;290;94	1	106	0	19.298	5.3	7	7.1	4523900000	416090000	146370000	141090000	3	4	4	49
O15067;F5GWT9;H0YGH1;J3KT98;J3QSG0;J3QSH6;J3KTL4;J3KTQ5;J3QL39	O15067;F5GWT9	28;17;4;3;3;3;2;1;1	28;17;4;3;3;3;2;1;1	28;17;4;3;3;3;2;1;1	740610000	655140000	643980000	Phosphoribosylformylglycinamidine synthase	PFAS	;	9	28	28	28	21	22	20	21	22	20	21	22	20	32.1	32.1	32.1	144.73	1338	1338;914;385;116;131;135;103;62;87	1	277	0	160.83	24.3	23.6	22.5	8197300000	826400000	857710000	574560000	11	11	8	134
O15091-4;O15091-2;O15091;O15091-3	O15091-4;O15091-2;O15091	3;3;3;1	3;3;3;1	3;3;3;1	27951000	33286000	30820000	Mitochondrial ribonuclease P protein 3	KIAA0391	;;	4	3	3	3	2	3	3	2	3	3	2	3	3	7	7	7	56.486	488	488;567;583;211	1	31	0	4.9118	4.7	7	7	340080000	26470000	43857000	30492000	1	0	1	15
O15116;E5RJ47;E5RH18	O15116;E5RJ47;E5RH18	2;1;1	2;1;1	2;1;1	94959000	91750000	122790000	U6 snRNA-associated Sm-like protein LSm1	LSM1	;;	3	2	2	2	2	2	2	2	2	2	2	2	2	17.3	17.3	17.3	15.179	133	133;44;44	1	27	0	5.2561	17.3	17.3	17.3	1276600000	102890000	104520000	109320000	2	1	0	13
O15118;K7EQ23;B4DET3	O15118;K7EQ23;B4DET3	11;7;7	11;7;7	11;7;7	447570000	466300000	438740000	Niemann-Pick C1 protein	NPC1	;;	3	11	11	11	10	8	10	10	8	10	10	8	10	11.9	11.9	11.9	142.17	1278	1278;971;960	1	156	0	79.244	10.4	8.5	11.3	5353100000	422780000	423500000	483140000	8	10	7	84
O15120-2;O15120	O15120-2;O15120	2;2	2;2	2;2	0	0	11021000	1-acyl-sn-glycerol-3-phosphate acyltransferase beta	AGPAT2	;	2	2	2	2	1	1	1	1	1	1	1	1	1	15	15	15	27.279	246	246;278	1	8	0.00075853	2.7937	9.8	9.8	5.3	37484000	7351200	6779000	9801800	0	0	1	5
O15121;E7EMA0	O15121	4;1	4;1	4;1	199000000	147390000	138870000	Sphingolipid delta(4)-desaturase DES1	DEGS1		2	4	4	4	4	4	4	4	4	4	4	4	4	17	17	17	37.866	323	323;261	1	61	0	27.864	17	17	17	1679500000	151550000	159500000	154300000	2	2	4	30
O15127;H3BV04;H3BN93;H3BUB6;H3BPL9	O15127;H3BV04;H3BN93;H3BUB6;H3BPL9	2;1;1;1;1	2;1;1;1;1	2;1;1;1;1	70263000	65218000	87170000	Secretory carrier-associated membrane protein 2	SCAMP2	;;;;	5	2	2	2	2	2	2	2	2	2	2	2	2	9.7	9.7	9.7	36.648	329	329;194;236;254;278	1	45	0	16.637	9.7	9.7	9.7	857400000	71014000	38877000	79415000	2	2	4	23
O15143;C9J4Z7;F8VXW2;C9JEY1;C9JQM8;C9JFG9;C9J6C8;C9JBJ7;C9K057;C9JTT6;C9JM51;F8WEB3	O15143	15;6;6;6;6;6;6;5;5;4;1;1	15;6;6;6;6;6;6;5;5;4;1;1	14;6;6;6;6;6;6;5;5;4;1;1	1523200000	1422500000	1188000000	Actin-related protein 2/3 complex subunit 1B	ARPC1B		12	15	15	14	15	14	14	15	14	14	14	13	13	48.7	48.7	42.5	40.949	372	372;128;130;130;132;132;132;102;108;82;21;32	1	280	0	133.33	48.7	48.7	48.4	16921000000	1616900000	1728700000	1152600000	17	17	16	191
O15144;C9JTV5;G5E9J0;H7C3F9;G5E9S7	O15144	17;6;6;4;2	17;6;6;4;2	17;6;6;4;2	1877200000	1874200000	1654000000	Actin-related protein 2/3 complex subunit 2	ARPC2		5	17	17	17	14	15	13	14	15	13	14	15	13	67.7	67.7	67.7	34.333	300	300;89;91;165;38	1	285	0	77.981	62.3	62.3	51	20376000000	2019900000	2206100000	1335600000	13	14	14	175
O15145;C9JZD1;F8VR50	O15145;C9JZD1	8;4;3	8;4;3	8;4;3	648150000	695680000	651870000	Actin-related protein 2/3 complex subunit 3	ARPC3	;	3	8	8	8	8	7	6	8	7	6	8	7	6	42.7	42.7	42.7	20.546	178	178;99;84	1	122	0	35.487	42.7	36.5	32.6	7998100000	858140000	828550000	486360000	7	7	4	72
O15160-2;O15160;E7EQB9;D6RDJ3;H0Y723	O15160-2;O15160;E7EQB9	5;5;4;2;1	5;5;4;2;1	5;5;4;2;1	47677000	56975000	62629000	DNA-directed RNA polymerases I and III subunit RPAC1	POLR1C	;;	5	5	5	5	3	3	5	3	3	5	3	3	5	24.9	24.9	24.9	38.646	342	342;346;296;124;140	1	46	0	23.655	13.7	13.7	24.9	624310000	34754000	59731000	86187000	0	1	2	13
O15173;O15173-2;U3KQM0;D3DNX8	O15173;O15173-2;U3KQM0	10;10;5;1	10;10;5;1	9;9;4;1	788360000	818560000	813020000	Membrane-associated progesterone receptor component 2	PGRMC2	;;	4	10	10	9	8	8	9	8	8	9	7	7	8	39.5	39.5	39.5	23.818	223	223;247;91;44	1	151	0	113.08	33.2	33.2	39.5	9675900000	598310000	818030000	700980000	5	6	4	81
O15212;A2AB88	O15212;A2AB88	10;7	10;7	10;7	726230000	779520000	786790000	Prefoldin subunit 6	PFDN6	;	2	10	10	10	9	9	10	9	9	10	9	9	10	55	55	55	14.582	129	129;103	1	154	0	78.274	55	55	55	9525900000	721160000	840000000	706210000	6	8	6	91
O15258;Q5T093;Q5T092;Q5T091	O15258;Q5T093;Q5T092;Q5T091	4;3;3;3	4;3;3;3	4;3;3;3	253150000	267990000	261220000	Protein RER1	RER1	;;;	4	4	4	4	4	4	4	4	4	4	4	4	4	19.4	19.4	19.4	22.958	196	196;117;158;187	1	78	0	15.64	19.4	19.4	19.4	3349300000	221980000	252850000	292030000	4	4	2	43
O15269;O15269-2	O15269	10;3	10;3	10;3	160590000	101130000	90067000	Serine palmitoyltransferase 1	SPTLC1		2	10	10	10	5	7	3	5	7	3	5	7	3	26	26	26	52.743	473	473;143	1	71	0	20.019	11.4	19.2	8.5	1244800000	143740000	159700000	59998000	2	2	2	22
O15270;H0YJV2	O15270	3;1	3;1	3;1	19081000	0	0	Serine palmitoyltransferase 2	SPTLC2		2	3	3	3	2	2	0	2	2	0	2	2	0	7.5	7.5	7.5	62.924	562	562;407	1	20	0	10.338	5.5	5.5	0	183180000	20179000	18654000	0	1	0	0	6
O15294;O15294-3;O15294-2;O15294-4;C9JZL3;H7C2T7	O15294;O15294-3;O15294-2;O15294-4	17;15;12;9;4;2	17;15;12;9;4;2	17;15;12;9;4;2	229460000	298190000	311640000	UDP-N-acetylglucosamine--peptide N-acetylglucosaminyltransferase 110 kDa subunit	OGT	;;;	6	17	17	17	14	12	7	14	12	7	14	12	7	21.9	21.9	21.9	116.92	1046	1046;1036;920;665;156;211	1	164	0	57.034	19	15.8	10.4	3510200000	204100000	221120000	165830000	2	4	1	41
O15305;H3BRM0;H3BV55;B7Z6R0;H3BR08;H3BM92;H3BV34;H3BT06;H3BNY9;H3BPH4;B7Z419;F5H0W0	O15305;H3BRM0;H3BV55;B7Z6R0;H3BR08;H3BM92;H3BV34;H3BT06;H3BNY9;H3BPH4	4;3;3;3;2;2;2;2;2;2;1;1	4;3;3;3;2;2;2;2;2;2;1;1	4;3;3;3;2;2;2;2;2;2;1;1	172140000	165560000	166050000	Phosphomannomutase 2;Phosphomannomutase	PMM2	;;;;;;;;;	12	4	4	4	3	4	4	3	4	4	3	4	4	22.8	22.8	22.8	28.082	246	246;155;219;119;65;66;70;90;91;142;121;163	1	50	0	24.615	18.3	22.8	22.8	2037100000	116380000	238950000	163960000	3	4	4	43
O15355	O15355	16	16	16	538660000	621150000	697800000	Protein phosphatase 1G	PPM1G		1	16	16	16	11	12	15	11	12	15	11	12	15	43.4	43.4	43.4	59.271	546	546	1	176	0	64.139	31.1	31.5	41.6	7364800000	440080000	656510000	589610000	5	10	9	99
O15357;O15357-2;F5GY16;H7BXR2;F5H588;H0YFZ4;F5GXI6;H0Y5Q9;H7C2V3;H7C292;Q92835-3;Q92835-2;Q92835	O15357;O15357-2	38;33;6;3;1;1;1;1;1;1;1;1;1	38;33;6;3;1;1;1;1;1;1;1;1;1	38;33;6;3;1;1;1;1;1;1;1;1;1	1211700000	1152700000	1100700000	Phosphatidylinositol 3,4,5-trisphosphate 5-phosphatase 2	INPPL1	;	13	38	38	38	31	29	25	31	29	25	31	29	25	38.4	38.4	38.4	138.6	1258	1258;1016;127;149;33;197;596;810;941;941;976;1188;1189	1	453	0	194.53	32	29.2	23.8	13567000000	1333100000	1389000000	862330000	19	22	14	222
O15371;B4DVY1;B0QYA5;B0QYA6;B0QYA7;B0QYA4;B0QYA8	O15371;B4DVY1;B0QYA5	20;19;10;5;4;3;3	20;19;10;5;4;3;3	20;19;10;5;4;3;3	1409400000	1317400000	1274500000	Eukaryotic translation initiation factor 3 subunit D	EIF3D	;;	7	20	20	20	16	15	15	16	15	15	16	15	15	60	60	60	63.972	548	548;499;269;173;186;105;123	1	261	0	224.53	45.6	41.8	42.5	15947000000	1570300000	1545400000	1166500000	15	15	14	169
O15382;B3KSI3;M0QXF9;M0QZ10;O15382-2;M0QZP4;M0R2K7	O15382;B3KSI3;M0QXF9;M0QZ10;O15382-2;M0QZP4	12;11;11;10;10;8;2	12;11;11;10;10;8;2	12;11;11;10;10;8;2	221470000	202090000	200730000	Branched-chain-amino-acid aminotransferase, mitochondrial;Branched-chain-amino-acid aminotransferase	BCAT2	;;;;;	7	12	12	12	9	8	8	9	8	8	9	8	8	42.9	42.9	42.9	44.287	392	392;352;445;405;300;313;108	1	123	0	43.707	34.7	26.3	29.3	2591700000	203780000	197520000	196880000	4	2	4	56
O15397;O15397-2;F5H244;F5H2I3;H0YH64	O15397;O15397-2	13;10;3;2;1	12;9;3;2;1	12;9;3;2;1	184210000	154940000	168600000	Importin-8	IPO8	;	5	13	12	12	12	11	8	11	10	7	11	10	7	14.6	13.6	13.6	119.94	1037	1037;832;167;46;167	1	114	0	34.044	13.5	12.7	9.6	1987100000	230220000	177520000	164640000	7	3	5	49
O15400-2;O15400	O15400-2;O15400	4;4	4;4	4;4	118250000	136960000	114700000	Syntaxin-7	STX7	;	2	4	4	4	3	4	3	3	4	3	3	4	3	24.3	24.3	24.3	27.4	239	239;261	1	47	0	10.983	17.6	24.3	17.6	1549200000	154820000	229160000	128200000	1	1	0	9
O15427;J3QQV2;J3QSC3;J3QQS9;J3KTI8;J3KT83;J3QRA0;J3QLE3;J3KTM6;J3QRU2;J3QRP8	O15427;J3QQV2;J3QSC3	11;7;7;5;5;4;4;2;2;2;1	11;7;7;5;5;4;4;2;2;2;1	11;7;7;5;5;4;4;2;2;2;1	2294400000	1852300000	2026300000	Monocarboxylate transporter 4	SLC16A3	;;	11	11	11	11	10	10	9	10	10	9	10	10	9	23.4	23.4	23.4	49.469	465	465;263;291;235;306;219;223;135;157;163;79	1	169	0	40.154	21.7	21.7	20.2	23514000000	2210900000	2041800000	1662400000	8	7	6	92
O15438;O15438-4;O15438-2;O15438-5	O15438;O15438-4;O15438-2	6;6;3;1	6;6;3;1	6;6;3;1	49350000	42411000	35295000	Canalicular multispecific organic anion transporter 2	ABCC3	;;	4	6	6	6	5	5	6	5	5	6	5	5	6	5.2	5.2	5.2	169.34	1527	1527;1578;1238;572	1	48	0	9.5271	4.3	4.3	5.2	478730000	45987000	56676000	40932000	2	1	1	11
O15460-2;O15460;E7ENX0;E7EPI9;C9JX45;A8MXE0;E7ERI1;C9JCP0;C9JN43;C9JIG4;C9JFJ1	O15460-2;O15460	17;17;5;5;4;4;4;3;2;2;1	17;17;5;5;4;4;4;3;2;2;1	17;17;5;5;4;4;4;3;2;2;1	756500000	756270000	770510000	Prolyl 4-hydroxylase subunit alpha-2	P4HA2	;	11	17	17	17	12	12	14	12	12	14	12	12	14	37	37	37	60.632	533	533;535;204;236;153;167;184;146;101;114;50	1	188	0	38.051	28.7	27.2	32.6	8983900000	842310000	844040000	809830000	10	6	7	87
O15498;B4DR94;H7C3K7	O15498;B4DR94	8;6;1	8;6;1	8;6;1	267790000	207560000	233760000	Synaptobrevin homolog YKT6	YKT6	;	3	8	8	8	8	6	7	8	6	7	8	6	7	51.5	51.5	51.5	22.417	198	198;164;29	1	123	0	49.342	51.5	33.8	42.9	3295500000	285520000	274150000	288960000	5	2	5	41
O15511;B1ALC0;O15511-2	O15511;B1ALC0;O15511-2	6;5;5	6;5;5	5;4;4	508960000	452530000	469820000	Actin-related protein 2/3 complex subunit 5	ARPC5	;;	3	6	6	5	4	3	5	4	3	5	3	2	4	62.3	62.3	57	16.32	151	151;135;154	1	58	0	42.819	34.4	25.8	39.1	5155600000	482790000	410590000	472570000	3	3	4	41
O43143	O43143	32	32	31	1453800000	1368100000	1383700000	Pre-mRNA-splicing factor ATP-dependent RNA helicase DHX15	DHX15		1	32	32	31	28	25	26	28	25	26	27	24	25	50.2	50.2	49.1	90.932	795	795	1	415	0	161.28	44.9	41.1	41.8	16446000000	1797900000	1716000000	1261200000	25	25	18	247
O43148;O43148-2;K7EP06;K7EPP5;F5H2D9;K7ERH6	O43148;O43148-2;K7EP06	6;6;3;2;2;1	6;6;3;2;2;1	6;6;3;2;2;1	58479000	86833000	107290000	mRNA cap guanine-N7 methyltransferase	RNMT	;;	6	6	6	6	4	6	4	4	6	4	4	6	4	15.8	15.8	15.8	54.843	476	476;504;298;101;234;114	1	68	0	10.366	10.5	15.8	11.8	1099700000	81421000	144680000	72036000	0	5	3	25
O43156	O43156	6	6	6	66591000	69412000	0	TELO2-interacting protein 1 homolog	TTI1		1	6	6	6	6	5	3	6	5	3	6	5	3	6.3	6.3	6.3	122.07	1089	1089	1	55	0	15.293	6.3	5.1	3.2	737340000	73521000	67337000	46727000	0	1	0	13
O43172-2;O43172	O43172-2;O43172	11;11	11;11	11;11	213650000	257690000	220070000	U4/U6 small nuclear ribonucleoprotein Prp4	PRPF4	;	2	11	11	11	9	7	8	9	7	8	9	7	8	29.9	29.9	29.9	58.32	521	521;522	1	100	0	23.489	24.6	19.4	22.6	2805600000	154420000	205990000	196310000	3	5	3	40
O43175;Q5SZU1	O43175;Q5SZU1	16;13	16;13	16;13	1528500000	1372900000	1420000000	D-3-phosphoglycerate dehydrogenase	PHGDH	;	2	16	16	16	14	14	14	14	14	14	14	14	14	37.1	37.1	37.1	56.65	533	533;499	1	238	0	82.951	32.1	29.8	32.6	16779000000	1658500000	1567200000	1192600000	12	14	11	159
O43237;O43237-2;J3KRI4;B4E2E0;E7EPL8;J3KRZ2;H3BUM4	O43237;O43237-2	12;10;5;5;3;2;2	11;10;5;4;2;2;2	11;10;5;4;2;2;2	316460000	361040000	372330000	Cytoplasmic dynein 1 light intermediate chain 2	DYNC1LI2	;	7	12	11	11	11	10	11	10	9	10	10	9	10	37.8	35.2	35.2	54.099	492	492;415;167;271;209;92;186	1	126	0	43.684	37.8	34.6	35.8	4020900000	335150000	394610000	385230000	3	8	7	66
O43242;B4DT72;H0YGV8;F5H8K4	O43242;B4DT72	28;20;4;1	28;20;4;1	28;20;4;1	1393400000	1532100000	1408500000	26S proteasome non-ATPase regulatory subunit 3	PSMD3	;	4	28	28	28	23	21	20	23	21	20	23	21	20	55.1	55.1	55.1	60.977	534	534;356;117;86	1	347	0	155.76	47.8	42.3	41.6	17789000000	1611100000	1661100000	1164800000	13	21	16	176
O43252	O43252	19	19	19	767970000	744760000	727040000	Bifunctional 3-phosphoadenosine 5-phosphosulfate synthase 1;Sulfate adenylyltransferase;Adenylyl-sulfate kinase	PAPSS1		1	19	19	19	16	14	15	16	14	15	16	14	15	45	45	45	70.832	624	624	1	238	0	63.124	38.8	34.3	36.2	8867800000	854640000	770860000	657250000	13	8	9	85
O43264;A1A528;F5H3C1	O43264;A1A528	9;8;1	9;8;1	9;8;1	100840000	80066000	59773000	Centromere/kinetochore protein zw10 homolog	ZW10	;	3	9	9	9	7	6	7	7	6	7	7	6	7	15	15	15	88.828	779	779;672;135	1	75	0	20.525	10.7	8.9	11.4	966430000	134900000	81711000	87953000	2	4	2	30
O43286	O43286	1	1	1	0	0	193820000	Beta-1,4-galactosyltransferase 5	B4GALT5		1	1	1	1	1	1	1	1	1	1	1	1	1	2.1	2.1	2.1	45.118	388	388	1	25	0.0080423	1.773	2.1	2.1	2.1	2158300000	194330000	207730000	172380000	1	1	1	13
O43290;E9PQI8	O43290	5;1	5;1	5;1	54363000	52104000	55834000	U4/U6.U5 tri-snRNP-associated protein 1	SART1		2	5	5	5	4	4	5	4	4	5	4	4	5	9.1	9.1	9.1	90.254	800	800;164	1	41	0	9.6157	6.6	6.6	9.1	546510000	46856000	49462000	66378000	2	2	1	14
O43292;O43292-2;E9PPZ9;E9PQ31;E9PLV6;E9PM11;E9PLG8;E9PM94	O43292;O43292-2;E9PPZ9;E9PQ31	8;7;4;4;3;2;1;1	8;7;4;4;3;2;1;1	8;7;4;4;3;2;1;1	176060000	112140000	113330000	Glycosylphosphatidylinositol anchor attachment 1 protein	GPAA1	;;;	8	8	8	8	6	6	6	6	6	6	6	6	6	13	13	13	67.622	621	621;561;260;265;234;158;81;98	1	65	0	12.002	10.3	10.5	9.3	1529500000	164330000	121340000	115670000	1	1	0	18
O43293;O43293-2	O43293;O43293-2	2;1	2;1	2;1	0	0	18336000	Death-associated protein kinase 3	DAPK3	;	2	2	2	2	1	1	2	1	1	2	1	1	2	4.8	4.8	4.8	52.535	454	454;322	1	19	0.0002588	3.132	2	2	4.8	122850000	7542000	6022700	18021000	1	1	2	12
O43314-2;O43314	O43314-2;O43314	1;1	1;1	1;1	5794400	0	0	Inositol hexakisphosphate and diphosphoinositol-pentakisphosphate kinase 2	PPIP5K2	;	2	1	1	1	1	0	0	1	0	0	1	0	0	1.1	1.1	1.1	138.1	1222	1222;1243	1	1	0.0099458	1.6307	1.1	0	0	6036200	6036200	0	0	1	0	0	1
O43324;D6RBD7;C9J1V9;O43324-2;H0YAL7;D6RCQ0;H0YAH9	O43324;D6RBD7;C9J1V9;O43324-2;H0YAL7	9;7;7;7;6;2;1	9;7;7;7;6;2;1	9;7;7;7;6;2;1	425620000	478880000	480140000	Eukaryotic translation elongation factor 1 epsilon-1	EEF1E1;EEF1E1-BLOC1S5	;;;;	7	9	9	9	6	9	9	6	9	9	6	9	9	60.9	60.9	60.9	19.81	174	174;150;151;139;136;94;56	1	131	0	28.113	34.5	60.9	60.9	5303000000	439140000	495540000	353920000	5	4	2	56
O43353-2;O43353	O43353-2;O43353	2;2	2;2	2;2	34751000	0	0	Receptor-interacting serine/threonine-protein kinase 2	RIPK2	;	2	2	2	2	2	1	1	2	1	1	2	1	1	6.9	6.9	6.9	45.581	403	403;540	1	16	0	19.543	6.9	3.2	3.2	241990000	36201000	14149000	12176000	1	0	0	8
O43379;O43379-4	O43379;O43379-4	2;2	2;2	2;2	0	0	15116000	WD repeat-containing protein 62	WDR62	;	2	2	2	2	0	1	2	0	1	2	0	1	2	1.9	1.9	1.9	165.95	1518	1518;1523	1	15	0.00025893	3.1333	0	1.1	1.9	101890000	0	8926100	13445000	0	1	0	5
O43390;O43390-2;O43390-3;O43390-4;B4DT28;E7ETM7	O43390;O43390-2;O43390-3;O43390-4;B4DT28;E7ETM7	25;24;22;20;18;14	19;18;17;15;14;10	19;18;17;15;14;10	514000000	591810000	547960000	Heterogeneous nuclear ribonucleoprotein R	HNRNPR	;;;;;	6	25	19	19	20	19	22	14	13	16	14	13	16	47.1	37.8	37.8	70.942	633	633;636;595;535;494;473	1	243	0	72.523	35.7	37.1	40.9	6807200000	476510000	514600000	484930000	5	8	11	104
O43396;K7ER96;G3V1K0;K7EML9;K7EPB7;K7EME7;K7EKG2	O43396;K7ER96;G3V1K0	14;13;8;6;2;2;1	14;13;8;6;2;2;1	14;13;8;6;2;2;1	841270000	1029600000	1009800000	Thioredoxin-like protein 1	TXNL1	;;	7	14	14	14	13	12	11	13	12	11	13	12	11	76.8	76.8	76.8	32.251	289	289;281;166;138;69;103;27	1	173	0	113.51	76.8	68.2	61.2	11727000000	973660000	1128300000	831540000	11	10	7	118
O43399;O43399-5;O43399-7	O43399;O43399-5;O43399-7	13;13;13	13;13;13	3;3;3	1353600000	1364200000	1306400000	Tumor protein D54	TPD52L2	;;	3	13	13	3	12	13	11	12	13	11	3	3	3	62.6	62.6	13.6	22.237	206	206;220;229	1	196	0	225.08	62.6	62.6	61.7	15276000000	1489100000	1566600000	1127700000	10	11	9	116
O43399-2;O43399-4;O43399-3;O43399-6	O43399-2;O43399-4;O43399-3;O43399-6	11;11;11;9	1;1;1;1	1;1;1;1	20348000	0	0	Tumor protein D54	TPD52L2	;;;	4	11	1	1	10	10	9	1	0	1	1	0	1	60.8	6.5	6.5	19.901	186	186;200;209;163	1	4	0.00050981	2.9023	60.8	54.3	59.7	46642000	21197000	0	0	1	0	1	2
O43402;M0R1B0;O43402-2	O43402;M0R1B0	3;2;1	3;2;1	3;2;1	0	0	17520000	ER membrane protein complex subunit 8	EMC8	;	3	3	3	3	1	1	1	1	1	1	1	1	1	16.7	16.7	16.7	23.773	210	210;100;126	1	12	0	3.9522	7.6	7.6	7.6	299020000	16365000	13389000	15582000	0	1	2	6
O43427-2;O43427;E9PSD3;H0YCE7;E9PJW6	O43427-2;O43427;E9PSD3	5;5;3;2;2	5;5;3;2;2	5;5;3;2;2	42319000	0	0	Acidic fibroblast growth factor intracellular-binding protein	FIBP	;;	5	5	5	5	4	2	2	4	2	2	4	2	2	17.4	17.4	17.4	41.21	357	357;364;348;137;146	1	39	0	7.7978	14.8	7.3	6.7	432470000	55218000	30761000	14455000	3	1	0	17
O43432;O43432-3;O43432-4;F5H564;F5H8J4;Q5SWD0	O43432;O43432-3;O43432-4;F5H564;F5H8J4	21;21;18;17;16;1	15;15;12;12;11;1	11;11;11;11;11;1	183210000	202860000	194450000	Eukaryotic translation initiation factor 4 gamma 3	EIF4G3	;;;;	6	21	15	11	15	17	18	9	11	12	6	8	9	15.5	11.9	9.3	176.65	1585	1585;1591;1305;1189;1075;164	1	143	0	28.795	10.7	12.2	12.9	2545500000	214310000	264840000	186390000	2	3	2	31
O43447;C9JQD4;A6NNE7;H0YEL5;A6NM32	O43447;C9JQD4;A6NNE7;H0YEL5	8;7;6;5;2	8;7;6;5;2	8;7;6;5;2	331760000	283900000	266300000	Peptidyl-prolyl cis-trans isomerase H;Peptidyl-prolyl cis-trans isomerase	PPIH	;;;	5	8	8	8	6	7	6	6	7	6	6	7	6	62.1	62.1	62.1	19.208	177	177;144;134;96;57	1	71	0	19.395	34.5	49.7	34.5	3359600000	379270000	375920000	273030000	5	3	3	41
O43464-2;O43464-3;O43464;O43464-4;P83110-2;P83110	O43464-2;O43464-3;O43464;O43464-4	6;6;6;3;1;1	6;6;6;3;1;1	6;6;6;3;1;1	56589000	54811000	59489000	Serine protease HTRA2, mitochondrial	HTRA2	;;;	6	6	6	6	3	3	4	3	3	4	3	3	4	28	28	28	38.493	361	361;436;458;377;357;453	1	42	0	44.993	13	13	16.6	725460000	58517000	58754000	61904000	1	1	1	18
O43491;E9PHY5;O43491-4;E9PK52;O43491-3;E9PII3;O43491-2;H0Y5B0;Q6R5J7;E9PMV8;E9PQD2;E9PRG1;E9PIG0;Q6ZSX4;E9PMG5;E9PPC9;E9PJP4;E9PQN0;J3QS55;E9PN54	O43491;E9PHY5;O43491-4;E9PK52;O43491-3;E9PII3;O43491-2	25;24;22;21;19;18;18;9;7;6;4;3;3;3;3;2;1;1;1;1	25;24;22;21;19;18;18;9;7;6;4;3;3;3;3;2;1;1;1;1	23;22;20;19;17;16;16;9;7;6;4;3;3;3;3;2;1;1;0;1	541040000	656000000	608540000	Band 4.1-like protein 2	EPB41L2	;;;;;;	20	25	25	23	19	20	17	19	20	17	17	18	15	33.3	33.3	31.1	112.59	1005	1005;935;852;811;747;706;673;380;383;268;179;153;162;201;224;126;118;127;162;240	1	279	0	81.482	26.8	26.1	20.5	7198700000	652610000	791840000	422510000	11	15	7	99
O43504;R4GMU8;E9PLX3	O43504;R4GMU8;E9PLX3	5;4;4	5;4;4	5;4;4	247930000	222130000	280150000	Ragulator complex protein LAMTOR5	LAMTOR5	;;	3	5	5	5	4	4	4	4	4	4	4	4	4	96.7	96.7	96.7	9.6138	91	91;79;90	1	68	0	191.54	70.3	70.3	70.3	3322800000	371810000	289480000	140640000	3	3	4	43
O43583;F8VVL1	O43583;F8VVL1	7;5	7;5	7;5	50813000	84440000	82052000	Density-regulated protein	DENR	;	2	7	7	7	4	5	4	4	5	4	4	5	4	38.4	38.4	38.4	22.092	198	198;160	1	52	0	16.626	23.7	28.3	23.7	1010600000	57503000	106770000	73451000	0	5	0	22
O43592;F8WDU6;F5GYW6;F5GZM3	O43592	23;8;4;3	23;8;4;3	23;8;4;3	437430000	391720000	407570000	Exportin-T	XPOT		4	23	23	23	18	17	15	18	17	15	18	17	15	33.2	33.2	33.2	109.96	962	962;201;60;228	1	239	0	96.923	24.2	23.4	20.5	4957500000	547270000	399840000	396150000	11	10	8	98
O43615;M0QXU7;M0R301;M0QXM9;M0R124	O43615;M0QXU7	16;10;4;4;2	16;10;4;4;2	16;10;4;4;2	346930000	332490000	434370000	Mitochondrial import inner membrane translocase subunit TIM44	TIMM44	;	5	16	16	16	11	13	13	11	13	13	11	13	13	38.9	38.9	38.9	51.355	452	452;273;126;133;139	1	163	0	32.997	25.4	32.7	31.2	4542700000	345590000	391960000	369790000	2	3	5	39
O43617;O43617-2;A6NKE1	O43617;O43617-2	5;4;2	5;4;2	5;4;2	169900000	169270000	185400000	Trafficking protein particle complex subunit 3	TRAPPC3	;	3	5	5	5	4	4	4	4	4	4	4	4	4	24.4	24.4	24.4	20.274	180	180;134;118	1	57	0	6.8967	18.9	20.6	18.9	2337700000	219890000	172880000	170780000	1	2	3	27
O43633;M0R1T5;M0R1L7;M0QXX8	O43633;M0R1T5;M0R1L7	6;5;4;1	6;5;4;1	6;5;4;1	343160000	282530000	259790000	Charged multivesicular body protein 2a	CHMP2A	;;	4	6	6	6	4	4	5	4	4	5	4	4	5	23.4	23.4	23.4	25.104	222	222;227;159;55	1	57	0	19.015	14.9	14.9	23.4	3160900000	346120000	320870000	243860000	2	3	1	24
O43657	O43657	3	3	3	95279000	93253000	0	Tetraspanin-6	TSPAN6		1	3	3	3	3	2	1	3	2	1	3	2	1	15.5	15.5	15.5	27.563	245	245	1	34	0	6.0696	15.5	9.8	4.5	997140000	141300000	61215000	20591000	1	2	1	14
O43674;E7EWP0;H0Y886;O43674-2;F8WDZ2;F8WDD2;H7C568	O43674;E7EWP0;H0Y886;O43674-2;F8WDZ2;F8WDD2	4;3;3;3;2;2;1	4;3;3;3;2;2;1	4;3;3;3;2;2;1	0	291130000	321860000	NADH dehydrogenase [ubiquinone] 1 beta subcomplex subunit 5, mitochondrial	NDUFB5	;;;;;	7	4	4	4	2	3	4	2	3	4	2	3	4	18.5	18.5	18.5	21.75	189	189;177;206;137;42;66;100	1	32	0.00026596	3.464	8.5	14.3	18.5	3457700000	358700000	335160000	249950000	0	1	1	8
O43676;C9JKQ2	O43676;C9JKQ2	2;1	2;1	2;1	36838000	28669000	39752000	NADH dehydrogenase [ubiquinone] 1 beta subcomplex subunit 3	NDUFB3	;	2	2	2	2	2	2	2	2	2	2	2	2	2	21.4	21.4	21.4	11.402	98	98;65	1	25	0	4.624	21.4	21.4	21.4	474200000	38171000	32556000	36899000	2	2	2	17
O43681;K7ERW9	O43681	11;5	11;5	11;5	702420000	770830000	842410000	ATPase ASNA1	ASNA1		2	11	11	11	10	9	10	10	9	10	10	9	10	47.7	47.7	47.7	38.792	348	348;200	1	189	0	81.703	44	37.9	44	9119100000	779140000	840820000	693080000	11	9	12	125
O43684-2;O43684;J3QT28;B4DDM6;J3QSX4	O43684-2;O43684;J3QT28;B4DDM6	15;15;14;10;7	15;15;14;10;7	15;15;14;10;7	1437100000	1296200000	1612700000	Mitotic checkpoint protein BUB3	BUB3	;;;	5	15	15	15	14	14	14	14	14	14	14	14	14	66.6	66.6	66.6	36.954	326	326;328;278;248;145	1	218	0	103.94	64.4	64.4	62.6	17550000000	1626400000	1572400000	1349100000	10	12	9	139
O43688;O43688-2;K7EMK9;O43688-3;K7ENH4	O43688;O43688-2;K7EMK9;O43688-3	4;4;3;3;1	4;4;3;3;1	4;4;3;3;1	100430000	0	0	Lipid phosphate phosphohydrolase 2	PPAP2C	;;;	5	4	4	4	2	1	2	2	1	2	2	1	2	18.1	18.1	18.1	32.573	288	288;309;166;232;136	1	30	0	38.772	10.4	3.5	6.9	1041500000	104760000	46254000	59349000	1	0	0	14
O43707;O43707-2;F5GXS2;O43707-3;K7EP19;D6RH00	O43707;O43707-2;F5GXS2;O43707-3	68;49;39;39;7;1	68;49;39;39;7;1	19;12;12;12;4;0	43570000000	45677000000	46345000000	Alpha-actinin-4	ACTN4	;;;	6	68	68	19	64	64	65	64	64	65	19	18	18	79.1	79.1	24.7	104.85	911	911;692;521;521;105;72	1	1632	0	323.31	78.9	74.9	73.7	531730000000	46316000000	51188000000	41562000000	115	123	126	1418
O43709;O43709-3;H7C170	O43709;O43709-3;H7C170	3;3;2	3;3;2	3;3;2	58033000	59691000	81799000	Probable 18S rRNA (guanine-N(7))-methyltransferase	WBSCR22	;;	3	3	3	3	3	2	2	3	2	2	3	2	2	16.4	16.4	16.4	31.88	281	281;298;128	1	37	0	7.5196	16.4	10.7	10.7	775760000	62786000	56393000	56824000	1	1	1	19
O43719;Q5H919;Q5H918	O43719	12;5;5	12;5;5	12;5;5	141960000	150750000	148310000	HIV Tat-specific factor 1	HTATSF1		3	12	12	12	6	8	10	6	8	10	6	8	10	24	24	24	85.852	755	755;223;244	1	103	0	54.542	8.3	16.6	17.7	1774200000	106520000	192240000	123740000	2	4	4	31
O43752;O43752-2	O43752;O43752-2	4;2	4;2	4;2	44034000	36962000	54243000	Syntaxin-6	STX6	;	2	4	4	4	2	3	3	2	3	3	2	3	3	24.7	24.7	24.7	29.176	255	255;154	1	28	0	9.8864	9.8	20.4	20.4	490360000	32539000	52206000	48488000	1	2	0	10
O43760;Q3KQZ2;K7ELS8;K7ELD9;K7ENG9;K7EJ35	O43760;Q3KQZ2;K7ELS8;K7ELD9;K7ENG9	4;4;3;2;2;1	4;4;3;2;2;1	4;4;3;2;2;1	113220000	108820000	75936000	Synaptogyrin-2	SYNGR2	;;;;	6	4	4	4	2	3	3	2	3	3	2	3	3	16.1	16.1	16.1	24.81	224	224;275;135;65;113;168	1	40	0	5.7733	8	11.6	12.5	1392800000	92092000	109720000	95839000	0	0	0	17
O43765;K7EMD6;K7ERW5	O43765;K7EMD6	8;6;1	8;6;1	8;6;1	338810000	245810000	331490000	Small glutamine-rich tetratricopeptide repeat-containing protein alpha	SGTA	;	3	8	8	8	6	6	6	6	6	6	6	6	6	30	30	30	34.063	313	313;162;68	1	99	0	33.499	24	24	24	3498000000	349400000	302160000	279830000	4	4	6	52
O43772;C9JPE1;B4DWZ5	O43772;C9JPE1;B4DWZ5	5;4;4	5;4;4	5;4;4	44872000	52321000	65128000	Mitochondrial carnitine/acylcarnitine carrier protein	SLC25A20	;;	3	5	5	5	4	4	3	4	4	3	4	4	3	20.9	20.9	20.9	32.943	301	301;228;251	1	23	0	5.5415	18.3	15.6	13	399670000	66347000	72967000	55647000	1	1	2	9
O43809;H3BND3;H3BV41	O43809;H3BND3	12;9;5	12;9;5	12;9;5	996660000	1114600000	1119000000	Cleavage and polyadenylation specificity factor subunit 5	NUDT21	;	3	12	12	12	12	11	12	12	11	12	12	11	12	54.6	54.6	54.6	26.227	227	227;149;71	1	201	0	71.477	54.6	46.3	54.6	13107000000	1114600000	1263300000	1156400000	8	13	9	106
O43813;E9PHS0;F8WDS9;H7C2E3	O43813;E9PHS0	12;7;3;3	12;7;3;3	12;7;3;3	282290000	206040000	301550000	LanC-like protein 1	LANCL1	;	4	12	12	12	6	5	7	6	5	7	6	5	7	41.6	41.6	41.6	45.283	399	399;196;82;147	1	91	0	50.692	26.3	21.6	24.3	2902500000	254000000	208640000	244270000	5	5	6	50
O43815-2;O43815	O43815-2;O43815	6;6	6;6	6;6	59623000	0	0	Striatin	STRN	;	2	6	6	6	3	2	2	3	2	2	3	2	2	13.1	13.1	13.1	80.76	731	731;780	1	29	0	11.256	7.5	5.1	4	429490000	62112000	60505000	28829000	1	1	0	9
O43819;C9JBU1	O43819;C9JBU1	2;1	2;1	2;1	36454000	37364000	39600000	Protein SCO2 homolog, mitochondrial	SCO2	;	2	2	2	2	2	2	2	2	2	2	2	2	2	10.5	10.5	10.5	29.81	266	266;136	1	23	0	3.9459	10.5	10.5	10.5	435350000	34120000	38031000	37330000	1	1	0	11
O43837;O43837-2;O43837-3	O43837;O43837-2	10;9;4	10;9;4	10;9;4	162110000	227090000	195250000	Isocitrate dehydrogenase [NAD] subunit beta, mitochondrial	IDH3B	;	3	10	10	10	8	9	9	8	9	9	8	9	9	32.5	32.5	32.5	42.183	385	385;383;233	1	124	0	24.616	21.8	30.4	28.3	2473500000	162220000	247380000	194110000	7	4	6	67
O43852;O43852-3;O43852-6;O43852-5;O43852-15;O43852-10;H0Y875;O43852-9;O43852-13;O43852-14;O43852-11;O43852-12	O43852;O43852-3;O43852-6;O43852-5;O43852-15;O43852-10;H0Y875;O43852-9	22;22;16;15;13;13;12;12;9;9;9;4	22;22;16;15;13;13;12;12;9;9;9;4	5;5;5;5;0;5;0;2;5;5;5;0	4088700000	4913000000	5054900000	Calumenin	CALU	;;;;;;;	12	22	22	5	19	20	19	19	20	19	4	4	5	72.4	72.4	13.7	37.106	315	315;323;265;229;164;224;147;154;139;147;170;74	1	455	0	323.31	63.2	63.2	63.2	56438000000	4680600000	5440200000	4367000000	25	29	22	296
O43852-2;O43852-4;O43852-8;O43852-7	O43852-2;O43852-4;O43852-8	20;20;10;7	3;3;3;3	3;3;3;3	237040000	244420000	254670000	Calumenin	CALU	;;	4	20	3	3	18	18	16	3	2	2	3	2	2	74.3	15.6	15.6	37.134	315	315;323;201;161	1	36	0	17.907	65.1	56.5	56.5	2887700000	265790000	297500000	185700000	2	1	1	17
O43854-2;O43854	O43854-2;O43854	11;11	11;11	11;11	140740000	158140000	116870000	EGF-like repeat and discoidin I-like domain-containing protein 3	EDIL3	;	2	11	11	11	6	6	4	6	6	4	6	6	4	34.5	34.5	34.5	52.747	470	470;480	1	91	0	28.522	18.7	16.2	13	1800400000	112710000	148060000	62977000	2	3	4	48
O43865;O43865-2	O43865;O43865-2	11;9	11;9	6;4	270000000	204890000	256300000	Putative adenosylhomocysteinase 2	AHCYL1	;	2	11	11	6	8	10	6	8	10	6	4	5	3	26.6	26.6	16.4	58.951	530	530;483	1	102	0	29.235	17.4	22.6	12.1	2686600000	226850000	272860000	164950000	5	4	3	44
O43913;B4DXT8;O43913-2	O43913;B4DXT8;O43913-2	2;1;1	2;1;1	2;1;1	10037000	0	0	Origin recognition complex subunit 5	ORC5	;;	3	2	2	2	2	1	1	2	1	1	2	1	1	4.8	4.8	4.8	50.282	435	435;303;324	1	15	0	3.9606	4.8	2.1	2.1	117040000	10456000	10811000	6646400	0	0	0	3
O43920	O43920	1	1	1	0	12447000	0	NADH dehydrogenase [ubiquinone] iron-sulfur protein 5	NDUFS5		1	1	1	1	1	1	0	1	1	0	1	1	0	11.3	11.3	11.3	12.517	106	106	1	9	0.0026915	2.435	11.3	11.3	0	142570000	16447000	13985000	0	0	0	0	3
O43924;B8ZZK5;C9IZ52	O43924;B8ZZK5;C9IZ52	3;2;2	3;2;2	3;2;2	0	0	72001000	Retinal rod rhodopsin-sensitive cGMP 3,5-cyclic phosphodiesterase subunit delta	PDE6D	;;	3	3	3	3	2	1	2	2	1	2	2	1	2	28.7	28.7	28.7	17.42	150	150;93;104	1	19	0	4.8521	20.7	12.7	20.7	690900000	50772000	47758000	69041000	1	1	0	7
O43929;O43929-2;O43929-3;B7Z632;C9JGH7;C9J2X8;Q53SE3;Q5THS9;Q96NJ5-3;Q96NJ5-2;Q96NJ5	O43929;O43929-2;O43929-3	7;5;5;3;2;2;2;1;1;1;1	7;5;5;3;2;2;2;1;1;1;1	5;3;3;2;2;2;2;1;1;1;1	33828000	50601000	35683000	Origin recognition complex subunit 4	ORC4	;;	11	7	7	5	6	4	3	6	4	3	4	2	1	20.4	20.4	15.1	50.377	436	436;352;362;219;127;128;145;176;551;584;620	1	50	0	9.0642	17.7	10.6	8.9	465760000	63029000	57328000	30024000	1	2	0	19
O60216;E5RJW1;E5RJK5;E5RFV8;E5RIN7;Q9H4I0;E5RG18;E5RI01;E5RFZ5;Q9H4I0-2	O60216	5;2;2;2;2;2;1;1;1;1	5;2;2;2;2;2;1;1;1;1	5;2;2;2;2;2;1;1;1;1	31454000	30822000	37962000	Double-strand-break repair protein rad21 homolog	RAD21		10	5	5	5	2	4	4	2	4	4	2	4	4	9	9	9	71.689	631	631;120;124;225;228;556;69;135;176;521	1	38	0	7.0025	3	7.4	6.7	403270000	18122000	41945000	38537000	1	2	2	22
O60220	O60220	4	4	4	128880000	129020000	121460000	Mitochondrial import inner membrane translocase subunit Tim8 A	TIMM8A		1	4	4	4	3	3	3	3	3	3	3	3	3	68	68	68	10.998	97	97	1	49	0	35.473	38.1	56.7	38.1	1499900000	96524000	126810000	130130000	1	2	4	30
O60231;Q5SQH5;A2AB15	O60231	13;6;1	12;6;1	12;6;1	207400000	244910000	231690000	Putative pre-mRNA-splicing factor ATP-dependent RNA helicase DHX16	DHX16		3	13	12	12	11	11	9	10	10	8	10	10	8	17	16.1	16.1	119.26	1041	1041;560;295	1	135	0	40.918	14.2	14.3	12	2668500000	171060000	196770000	92708000	5	7	4	63
O60256;O60256-3;O60256-2;E7EPA1;O60256-4;C9K0K7;I3L0S1;C9JJS3;C9JDU5;I3L331;I3L164;C9JDH0;E7EW35;I3L4G9;I3L1T1;I3L3B8;I3L2J4	O60256;O60256-3;O60256-2;E7EPA1;O60256-4;C9K0K7;I3L0S1;C9JJS3	14;11;11;10;10;9;9;8;6;4;4;4;4;3;1;1;1	14;11;11;10;10;9;9;8;6;4;4;4;4;3;1;1;1	12;9;9;8;8;8;7;7;6;4;4;4;4;2;1;1;1	320310000	280810000	312370000	Phosphoribosyl pyrophosphate synthase-associated protein 2	PRPSAP2	;;;;;;;	17	14	14	12	12	10	11	12	10	11	10	8	9	55.3	55.3	49.6	40.925	369	369;320;329;268;283;244;260;194;176;93;104;140;161;143;47;57;78	1	155	0	46.165	43.9	37.7	42	3746500000	386570000	351010000	268640000	4	5	6	53
O60264;P28370-2;P28370	O60264	6;2;2	6;2;2	6;2;2	40417000	53438000	39431000	SWI/SNF-related matrix-associated actin-dependent regulator of chromatin subfamily A member 5	SMARCA5		3	6	6	6	5	4	3	5	4	3	5	4	3	6	6	6	121.9	1052	1052;1042;1054	1	42	0	8.8758	4.8	3.8	2.9	515020000	51824000	60411000	32767000	1	2	1	10
O60271-4;O60271-2;O60271;O60271-5;O60271-3;O60271-9;H0YBE9;H0YBS5;E9PFH7;Q9UPT6;Q9UPT6-2;H0Y981;D6RHI8	O60271-4;O60271-2;O60271;O60271-5;O60271-3;O60271-9	28;28;27;22;21;21;3;3;3;3;2;1;1	28;28;27;22;21;21;3;3;3;3;2;1;1	28;28;27;22;21;21;3;3;3;3;2;1;1	610820000	655770000	602330000	C-Jun-amino-terminal kinase-interacting protein 4	SPAG9	;;;;;	13	28	28	28	22	22	21	22	22	21	22	22	21	29.3	29.3	29.3	144.68	1307	1307;1311;1321;931;945;1177;174;250;1330;1336;250;152;156	1	311	0	148.94	22.9	23.5	22.1	7672800000	644950000	723130000	523940000	8	11	11	140
O60306;H0YH15	O60306	10;4	10;4	10;4	79687000	52270000	85394000	Intron-binding protein aquarius	AQR		2	10	10	10	6	3	6	6	3	6	6	3	6	10	10	10	171.29	1485	1485;646	1	67	0	24.764	5.1	2.7	5.5	770290000	74038000	35701000	61833000	3	1	3	32
O60333-2;O60333-3;O60333;O60333-4	O60333-2;O60333-3;O60333;O60333-4	2;1;1;1	2;1;1;1	2;1;1;1	0	0	26050000	Kinesin-like protein KIF1B	KIF1B	;;;	4	2	2	2	2	1	2	2	1	2	2	1	2	1.1	1.1	1.1	199.26	1770	1770;1153;1816;1823	1	17	0.0078595	1.8382	1.1	0.6	1.1	422020000	25030000	15534000	18727000	0	0	1	3
O60343;O60343-2;O60343-3;O60343-4;O60343-5;Q5JU47	O60343;O60343-2;O60343-3	12;11;11;5;5;2	12;11;11;5;5;2	12;11;11;5;5;2	111610000	166830000	115380000	TBC1 domain family member 4	TBC1D4	;;	6	12	12	12	8	4	5	8	4	5	8	4	5	10.8	10.8	10.8	146.56	1298	1298;1235;1290;462;515;282	1	77	0	19.097	7.5	3.5	4.6	1449600000	171130000	67489000	47709000	3	2	1	27
O60361	O60361	9	1	1	132410000	0	0	Putative nucleoside diphosphate kinase	NME2P1		1	9	1	1	8	8	8	1	1	1	1	1	1	66.4	7.3	7.3	15.529	137	137	1	15	1	-2	59.9	66.4	59.9	878540000	137940000	55152000	32616000	0	0	0	3
O60427;O60427-2;F5H8G5;F5H3P6;F5H3U5;H7C2V0	O60427;O60427-2	4;2;1;1;1;1	4;2;1;1;1;1	4;2;1;1;1;1	71051000	58548000	54040000	Fatty acid desaturase 1	FADS1	;	6	4	4	4	3	3	3	3	3	3	3	3	3	12.8	12.8	12.8	51.964	444	444;360;124;146;192;228	1	33	0	14.179	8.1	8.1	11	602010000	71402000	64441000	61132000	3	3	1	24
O60443;O60443-3;H7C3W1;O60443-2;H7C147;H7BZJ0	O60443;O60443-3	12;7;5;4;3;2	12;7;5;4;3;2	12;7;5;4;3;2	132440000	141000000	157690000	Non-syndromic hearing impairment protein 5	DFNA5	;	6	12	12	12	7	7	10	7	7	10	7	7	10	31	31	31	54.554	496	496;332;216;101;192;155	1	110	0	33.086	21.4	21.8	26.6	1971800000	124360000	116810000	166900000	1	3	5	54
O60488-2;O60488;D6RF95;H0Y9A0;D6RD96;D6RFW9;D6RDA8	O60488-2;O60488	24;24;8;7;6;5;5	22;22;8;7;6;5;5	22;22;8;7;6;5;5	529250000	451570000	457840000	Long-chain-fatty-acid--CoA ligase 4	ACSL4	;	7	24	22	22	17	17	15	15	15	13	15	15	13	46.1	41.8	41.8	74.435	670	670;711;154;156;145;126;128	1	203	0	90.033	33.6	33.7	30.3	5934900000	699780000	578780000	359330000	10	10	7	103
O60493;O60493-2;O60493-4;O60493-3	O60493;O60493-2;O60493-4	9;8;7;4	9;8;7;4	9;8;7;4	716590000	686200000	691770000	Sorting nexin-3	SNX3	;;	4	9	9	9	7	7	9	7	7	9	7	7	9	69.8	69.8	69.8	18.762	162	162;130;140;113	1	116	0	31.195	41.4	41.4	69.8	8669600000	759470000	745290000	641190000	5	8	8	74
O60502-4;O60502;O60502-2;O60502-3;H7C3X0;B4DYV7	O60502-4;O60502;O60502-2;O60502-3	16;16;15;11;7;3	16;16;15;11;7;3	16;16;15;11;7;3	292310000	251160000	243640000	Protein O-GlcNAcase	MGEA5	;;;	6	16	16	16	14	13	9	14	13	9	14	13	9	25.6	25.6	25.6	96.931	863	863;916;849;677;256;151	1	117	0	24.451	23.5	20.9	12.2	2630000000	338880000	288770000	215680000	5	4	3	36
O60503	O60503	1	1	1	0	9052900	0	Adenylate cyclase type 9	ADCY9		1	1	1	1	1	1	0	1	1	0	1	1	0	1.1	1.1	1.1	150.7	1353	1353	1	2	0.0093929	1.7453	1.1	1.1	0	17734000	7562800	10172000	0	0	0	0	0
O60506;O60506-2;O60506-3;O60506-4;O60506-5;F6UXX1	O60506;O60506-2;O60506-3;O60506-4;O60506-5	27;26;25;24;17;9	27;26;25;24;17;9	21;20;20;19;14;7	3431900000	3925600000	4259100000	Heterogeneous nuclear ribonucleoprotein Q	SYNCRIP	;;;;	6	27	27	21	23	25	26	23	25	26	17	19	20	48.2	48.2	38.7	69.602	623	623;588;562;527;410;185	1	471	0	300.44	41.4	45.3	46.9	47220000000	3619800000	4189000000	3569400000	29	29	32	329
O60518	O60518	13	11	11	79187000	87105000	82985000	Ran-binding protein 6	RANBP6		1	13	11	11	10	8	6	9	7	4	9	7	4	15	13.3	13.3	124.71	1105	1105	1	74	0	47.036	11.5	8.6	6	1018400000	132210000	94789000	44749000	4	3	1	29
O60547;O60547-2	O60547;O60547-2	7;6	7;6	7;6	207820000	149480000	181460000	GDP-mannose 4,6 dehydratase	GMDS	;	2	7	7	7	6	7	7	6	7	7	6	7	7	23.7	23.7	23.7	41.949	372	372;342	1	103	0	20.818	21.2	23.7	23.7	2089400000	231630000	190170000	145460000	8	4	3	46
O60563;O60563-2	O60563	5;1	5;1	5;1	36497000	29760000	0	Cyclin-T1	CCNT1		2	5	5	5	4	4	2	4	4	2	4	4	2	7.9	7.9	7.9	80.684	726	726;184	1	42	0	4.5107	6.7	6.7	2.8	498870000	41661000	41605000	18118000	1	1	0	10
O60566;O60566-3;O60566-2	O60566;O60566-3;O60566-2	4;4;2	4;4;2	4;4;2	0	0	28738000	Mitotic checkpoint serine/threonine-protein kinase BUB1 beta	BUB1B	;;	3	4	4	4	0	1	3	0	1	3	0	1	3	4.8	4.8	4.8	119.54	1050	1050;1064;933	1	16	0	5.5804	0	2.1	3.5	373600000	0	8712800	18240000	0	0	1	9
O60568;H7C2V1;H7C2S8;H7C0B8;C9JU11;C9JIX5;H7C2A8	O60568	29;11;9;4;2;1;1	29;11;9;4;2;1;1	29;11;9;4;2;1;1	1148100000	1287900000	1202900000	Procollagen-lysine,2-oxoglutarate 5-dioxygenase 3	PLOD3		7	29	29	29	24	24	27	24	24	27	24	24	27	52	52	52	84.784	738	738;270;264;66;171;75;125	1	423	0	133.5	46.1	42	45.4	14760000000	1394700000	1505900000	1051500000	27	23	21	246
O60573;C9JEL3;B9A044;B8ZZ50;O60573-2;B8ZZL3;B4E1E4;B9A023	O60573;C9JEL3;B9A044;B8ZZ50;O60573-2;B8ZZL3	6;5;5;5;5;3;2;2	6;5;5;5;5;3;2;2	6;5;5;5;5;3;2;2	98396000	84468000	92735000	Eukaryotic translation initiation factor 4E type 2	EIF4E2	;;;;;	8	6	6	6	4	5	3	4	5	3	4	5	3	35.5	35.5	35.5	28.362	245	245;213;233;236;234;200;188;189	1	56	0	13.924	26.1	26.9	16.3	1246800000	104590000	84029000	45991000	1	2	0	18
O60637-3;O60637;H0YKJ9;O60637-2;H0YMH8	O60637-3;O60637;H0YKJ9;O60637-2	4;4;2;2;1	4;4;2;2;1	4;4;2;2;1	210700000	196560000	149950000	Tetraspanin-3	TSPAN3	;;;	5	4	4	4	3	2	2	3	2	2	3	2	2	16.9	16.9	16.9	21.183	189	189;253;164;228;45	1	43	0	5.3646	13.2	7.4	4.8	2859500000	140410000	203700000	64124000	1	2	0	22
O60645-2;O60645-3;O60645;D6RB59;H0Y995;D6RBR9	O60645-2;O60645-3;O60645;D6RB59	13;13;13;9;4;2	13;13;13;9;4;2	13;13;13;9;4;2	158490000	173770000	156360000	Exocyst complex component 3	EXOC3	;;;	6	13	13	13	10	9	8	10	9	8	10	9	8	26.2	26.2	26.2	73.796	641	641;745;756;462;473;68	1	114	0	48.575	20	17.8	14.8	1938300000	200650000	231530000	127230000	5	4	2	35
O60664-4;O60664;O60664-3;K7ERZ3;O60664-2;K7EL96;K7ER39	O60664-4;O60664;O60664-3;K7ERZ3;O60664-2	23;23;21;15;12;10;7	23;23;21;15;12;10;7	23;23;21;15;12;10;7	3129600000	3253300000	3213500000	Perilipin-3	PLIN3	;;;;	7	23	23	23	22	22	22	22	22	22	22	22	22	69.2	69.2	69.2	45.803	422	422;434;433;292;251;172;168	1	422	0	323.31	67.5	69.2	64	38379000000	3357700000	3976100000	3217800000	22	24	22	254
O60671-2;O60671;D6R9A1;O60671-3	O60671-2;O60671	4;4;1;1	4;4;1;1	4;4;1;1	46330000	47671000	0	Cell cycle checkpoint protein RAD1	RAD1	;	4	4	4	4	3	3	1	3	3	1	3	3	1	24	24	24	27.827	246	246;282;84;68	1	29	0	23.946	17.5	17.5	3.7	489330000	48415000	54424000	16996000	2	1	1	16
O60678-2;O60678	O60678-2;O60678	1;1	1;1	1;1	0	11873000	0	Protein arginine N-methyltransferase 3	PRMT3	;	2	1	1	1	1	1	0	1	1	0	1	1	0	2.3	2.3	2.3	52.874	469	469;531	1	11	0.0097727	1.6694	2.3	2.3	0	129300000	13222000	13340000	0	0	0	0	1
O60701;O60701-2;O60701-3;E7ER83;E7ETF4;E7EV97;E7ER95;D6RHF4;E9PBD2	O60701;O60701-2;O60701-3	23;20;19;5;5;5;3;1;1	23;20;19;5;5;5;3;1;1	23;20;19;5;5;5;3;1;1	3217700000	3268900000	3013700000	UDP-glucose 6-dehydrogenase	UGDH	;;	9	23	23	23	22	21	21	22	21	21	22	21	21	55.9	55.9	55.9	55.023	494	494;427;397;130;153;181;84;53;55	1	340	0	323.31	54.5	54.3	54.3	37053000000	3370900000	3672700000	2505300000	24	26	15	262
O60725	O60725	2	2	2	0	51838000	53695000	Protein-S-isoprenylcysteine O-methyltransferase	ICMT		1	2	2	2	2	1	2	2	1	2	2	1	2	9.5	9.5	9.5	31.938	284	284	1	25	0.0002686	3.5905	9.5	6.3	9.5	484770000	79459000	48382000	55563000	0	1	1	2
O60749;O60749-2;D6RC15	O60749;O60749-2	13;12;3	11;10;3	11;10;3	516490000	516700000	545400000	Sorting nexin-2	SNX2	;	3	13	11	11	11	12	9	9	10	7	9	10	7	29.5	25.4	25.4	58.47	519	519;402;265	1	146	0	65.592	25.4	27	20.8	6242300000	481180000	652480000	387830000	5	7	7	78
O60784;E7EPD0;O60784-2;O60784-4;O60784-3;B0QY01;B3KUU1;V9GYF4;B0QY02;V9GZ68;H7BYN7;F8WB30;F8WAW7;F8WE29;F8WBB0	O60784;E7EPD0;O60784-2;O60784-4;O60784-3	15;14;14;13;12;7;6;5;5;3;3;1;1;1;1	15;14;14;13;12;7;6;5;5;3;3;1;1;1;1	15;14;14;13;12;7;6;5;5;3;3;1;1;1;1	260740000	298740000	307440000	Target of Myb protein 1	TOM1	;;;;	15	15	15	15	10	10	6	10	10	6	10	10	6	44.5	44.5	44.5	53.818	492	492;454;493;460;447;334;265;134;151;125;133;25;69;83;97	1	126	0	98.858	33.7	36.6	18.7	3547400000	279670000	361310000	217060000	9	9	3	72
O60826	O60826	13	13	13	143120000	135140000	137870000	Coiled-coil domain-containing protein 22	CCDC22		1	13	13	13	8	11	8	8	11	8	8	11	8	31.9	31.9	31.9	70.755	627	627	1	113	0	53.202	19.5	26.8	18.7	1552600000	162580000	224180000	99898000	4	7	6	52
O60828-2;O60828;O60828-5;O60828-4;H7C053;C9JQA1;O60828-6;O60828-3;O60828-10;O60828-9;O60828-8;O60828-7	O60828-2;O60828;O60828-5;O60828-4;H7C053;C9JQA1;O60828-6;O60828-3	4;4;3;3;2;2;2;2;1;1;1;1	4;4;3;3;2;2;2;2;1;1;1;1	4;4;3;3;2;2;2;2;1;1;1;1	69803000	70947000	107500000	Polyglutamine-binding protein 1	PQBP1	;;;;;;;	12	4	4	4	2	3	2	2	3	2	2	3	2	20.5	20.5	20.5	30.401	264	264;265;165;170;150;213;149;224;60;67;73;128	1	28	0	11.38	9.1	15.9	9.1	1064200000	72635000	105820000	95999000	1	1	2	18
O60832;H7BZF2;H7C0M1;C9IYT0;O60832-2	O60832;H7BZF2;H7C0M1;C9IYT0;O60832-2	3;2;2;2;2	3;2;2;2;2	3;2;2;2;2	0	37144000	0	H/ACA ribonucleoprotein complex subunit 4	DKC1	;;;;	5	3	3	3	1	2	1	1	2	1	1	2	1	9.9	9.9	9.9	57.673	514	514;76;229;258;420	1	24	0	4.8794	2.5	6.4	3.9	352950000	13809000	34003000	12729000	0	1	1	9
O60841	O60841	38	38	38	1088100000	1282500000	1359600000	Eukaryotic translation initiation factor 5B	EIF5B		1	38	38	38	27	30	29	27	30	29	27	30	29	37.7	37.7	37.7	138.83	1220	1220	1	400	0	174.34	29.5	32.9	29.9	16159000000	1131000000	1553900000	1270100000	11	15	15	201
O60869-2;O60869-3;O60869	O60869-2;O60869-3;O60869	10;10;10	10;10;10	10;10;10	900290000	912080000	967770000	Endothelial differentiation-related factor 1	EDF1	;;	3	10	10	10	9	10	9	9	10	9	9	10	9	59.7	59.7	59.7	15.48	139	139;141;148	1	156	0	36.612	54.7	59.7	59.7	11809000000	885780000	990590000	941610000	10	9	10	113
O60884;I3L320;H3BMW5	O60884	12;2;1	12;2;1	12;2;1	484510000	442260000	521200000	DnaJ homolog subfamily A member 2	DNAJA2		3	12	12	12	9	9	11	9	9	11	9	9	11	36.7	36.7	36.7	45.745	412	412;47;134	1	131	0	46.444	28.9	29.1	34.2	5652300000	515940000	359580000	621500000	6	4	6	61
O60885;M0QZD9;O60885-2;O60885-3	O60885	5;2;2;2	5;2;2;2	3;0;0;0	42289000	51467000	34790000	Bromodomain-containing protein 4	BRD4		4	5	5	3	2	4	2	2	4	2	1	3	1	3.8	3.8	2.5	152.22	1362	1362;572;722;794	1	45	0.00026151	3.2552	1.4	3.2	1.7	439960000	33270000	65636000	30003000	1	2	0	8
O60888-3;O60888;O60888-2;C9IZG4;C9IZQ5	O60888-3;O60888;O60888-2;C9IZG4	5;5;5;3;1	5;5;5;3;1	5;5;5;3;1	570780000	489910000	433990000	Protein CutA	CUTA	;;;	5	5	5	5	3	4	3	3	4	3	3	4	3	55.8	55.8	55.8	16.832	156	156;179;198;135;155	1	71	0	158.79	37.8	46.8	29.5	5841000000	682810000	421210000	303790000	7	7	4	76
O60921	O60921	1	1	1	0	25618000	0	Checkpoint protein HUS1	HUS1		1	1	1	1	0	1	0	0	1	0	0	1	0	4.3	4.3	4.3	31.691	280	280	1	7	0.0042755	2.0986	0	4.3	0	239010000	0	28783000	0	0	1	0	1
O60925;E5RGS4;D6RGG5	O60925;E5RGS4	8;7;1	8;7;1	8;7;1	710480000	702020000	594010000	Prefoldin subunit 1	PFDN1	;	3	8	8	8	7	7	7	7	7	7	7	7	7	68	68	68	14.21	122	122;117;35	1	125	0	59.954	62.3	62.3	62.3	7618500000	689890000	620310000	403440000	8	6	4	69
O75044;H0Y4C3;H0Y2P8;Q5VZB4;P0DJJ0;H0Y582;E9PDX4	O75044;H0Y4C3;H0Y2P8;Q5VZB4	8;7;7;4;3;1;1	8;7;7;4;3;1;1	7;6;6;3;3;1;1	55116000	64614000	43263000	SLIT-ROBO Rho GTPase-activating protein 2	SRGAP2	;;;	7	8	8	7	3	5	4	3	5	4	2	4	3	10.5	10.5	9.3	120.88	1071	1071;931;985;450;459;230;252	1	48	0	15.884	4.9	7.7	4.9	640820000	48406000	78797000	25999000	3	1	2	19
O75054;O75054-2	O75054;O75054-2	1;1	1;1	1;1	0	0	12391000	Immunoglobulin superfamily member 3	IGSF3	;	2	1	1	1	1	1	1	1	1	1	1	1	1	1.8	1.8	1.8	135.19	1194	1194;1214	1	6	0	4.0732	1.8	1.8	1.8	66902000	11130000	7767900	11021000	1	1	0	2
O75083;O75083-3;D6RD66	O75083;O75083-3	33;20;16	33;20;16	33;20;16	5133700000	4941700000	5084000000	WD repeat-containing protein 1	WDR1	;	3	33	33	33	31	29	31	31	29	31	31	29	31	68.6	68.6	68.6	66.193	606	606;466;245	1	622	0	323.31	68.5	66	67.2	63302000000	5692700000	5547800000	4720100000	33	32	39	453
O75086	O75086	1	1	1	0	0	78660000		mifr-2		1	1	1	1	1	0	1	1	0	1	1	0	1	3.9	3.9	3.9	41.639	386	386	1	12	0.0065466	1.9417	3.9	0	3.9	1310000000	128350000	0	69961000	0	0	1	7
O75116;E9PF63;D6REE7;C9JFJ0	O75116;E9PF63	28;26;3;1	28;26;3;1	26;24;3;1	442000000	458490000	437600000	Rho-associated protein kinase 2	ROCK2	;	4	28	28	26	18	21	19	18	21	19	16	20	18	24.7	24.7	23	160.9	1388	1388;1145;446;203	1	250	0	146.65	14.3	19.1	16.8	5501100000	434710000	562620000	384940000	9	8	11	124
O75131;E5RG68;H0YB26;E5RHZ0;E5RJ85;E5RG97;E5RFT7;Q7Z6C8;Q8IYJ1;Q96A23;O95741;Q9UBL6-2;Q96A23-2;Q9HCH3;O95741-2;Q9UBL6	O75131;E5RG68;H0YB26	14;9;7;6;5;3;2;1;1;1;1;1;1;1;1;1	14;9;7;6;5;3;2;1;1;1;1;1;1;1;1;1	13;9;7;6;5;3;2;0;0;0;0;0;0;0;0;0	490280000	413410000	447530000	Copine-3	CPNE3	;;	16	14	14	13	11	10	10	11	10	10	10	9	9	34.1	34.1	32.4	60.13	537	537;234;262;153;139;135;79;301;553;557;557;558;575;593;612;633	1	131	0	29.923	25.1	25.3	20.9	4991400000	682490000	461970000	361720000	8	7	6	69
O75146;O75146-2;H0YH66	O75146;O75146-2	12;6;2	12;6;2	12;6;2	98280000	111800000	119510000	Huntingtin-interacting protein 1-related protein	HIP1R	;	3	12	12	12	6	5	8	6	5	8	6	5	8	14.5	14.5	14.5	119.39	1068	1068;615;197	1	105	0	21.846	7.2	5.5	8.8	1415800000	65201000	98681000	96344000	1	2	2	29
O75165;H0Y8Q2	O75165	12;4	12;4	12;4	65457000	84592000	61518000	DnaJ homolog subfamily C member 13	DNAJC13		2	12	12	12	8	9	5	8	9	5	8	9	5	7.2	7.2	7.2	254.41	2243	2243;173	1	90	0	16.796	4.8	5.6	2.9	778910000	72456000	104060000	46477000	3	6	1	28
O75170-6;O75170-2;O75170-4;O75170-3;O75170-5;O75170;T1ECW5	O75170-6;O75170-2;O75170-4;O75170-3;O75170-5;O75170;T1ECW5	2;2;2;2;2;2;1	2;2;2;2;2;2;1	2;2;2;2;2;2;1	131760000	125650000	121610000	Serine/threonine-protein phosphatase 6 regulatory subunit 2	PPP6R2	;;;;;;	7	2	2	2	2	2	2	2	2	2	2	2	2	2.2	2.2	2.2	98.125	905	905;927;932;933;959;966;685	1	34	0	5.9749	2.2	2.2	2.2	1521900000	326600000	410140000	290860000	2	2	2	21
O75175-2;O75175;H7C148;O75175-3	O75175-2;O75175;H7C148;O75175-3	2;2;1;1	2;2;1;1	2;2;1;1	0	23856000	0	CCR4-NOT transcription complex subunit 3	CNOT3	;;;	4	2	2	2	2	2	1	2	2	1	2	2	1	3.8	3.8	3.8	64.052	609	609;753;375;571	1	14	0	4.04	3.8	3.8	1.6	109780000	13088000	26804000	18879000	0	0	0	1
O75223;M0QZK8;B8ZZK2;O75223-3;O75223-2;O75223-4;H7BZK5	O75223;M0QZK8;B8ZZK2;O75223-3	9;5;5;5;4;4;3	9;5;5;5;4;4;3	9;5;5;5;4;4;3	314980000	248390000	264700000	Gamma-glutamylcyclotransferase	GGCT	;;;	7	9	9	9	8	8	7	8	8	7	8	8	7	66	66	66	21.007	188	188;103;166;94;114;166;119	1	89	0	35.366	53.7	60.1	55.3	3290800000	480370000	306780000	195090000	6	7	4	57
O75306-2;O75306;B7Z9L2	O75306-2;O75306;B7Z9L2	11;11;7	11;11;7	11;11;7	213740000	190960000	208340000	NADH dehydrogenase [ubiquinone] iron-sulfur protein 2, mitochondrial	NDUFS2	;;	3	11	11	11	7	9	8	7	9	8	7	9	8	30	30	30	51.851	457	457;463;231	1	117	0	35.373	17.3	22.8	19.9	2675200000	214280000	212940000	169640000	2	3	3	42
O75323;O75323-2;C9K068;F8WBI5;C9J7B1;H7C333	O75323;O75323-2;C9K068	5;4;3;2;1;1	4;3;3;1;1;1	4;3;3;1;1;1	0	36438000	30718000	Protein NipSnap homolog 2	GBAS	;;	6	5	4	4	4	3	4	3	2	4	3	2	4	20.6	17.8	17.8	33.742	286	286;247;80;145;65;114	1	31	0	11.599	18.9	14.3	17.8	350890000	45403000	30807000	41530000	0	1	2	9
O75340;O75340-2;H0Y9X3;E7EPW6;O75340-3;D6RA21;Q86W51	O75340;O75340-2	9;8;3;2;2;1;1	9;8;3;2;2;1;1	9;8;3;2;2;1;1	1696600000	1377800000	1588000000	Programmed cell death protein 6	PDCD6	;	7	9	9	9	9	8	7	9	8	7	9	8	7	70.2	70.2	70.2	21.868	191	191;189;104;73;69;39;55	1	113	0	89.184	70.2	61.3	47.1	16707000000	1793100000	1732800000	1367700000	9	6	7	75
O75348;F2Z307;O95670-2;O95670	O75348	6;1;1;1	6;1;1;1	6;1;1;1	114290000	129720000	175190000	V-type proton ATPase subunit G 1	ATP6V1G1		4	6	6	6	4	4	5	4	4	5	4	4	5	48.3	48.3	48.3	13.757	118	118;99;78;118	1	54	0	72.158	28	33.9	48.3	1624900000	101010000	118280000	162760000	0	2	2	17
O75351;Q6PIW4-2;Q6PIW4	O75351	13;1;1	13;1;1	10;0;0	307790000	268930000	243140000	Vacuolar protein sorting-associated protein 4B	VPS4B		3	13	13	10	9	10	9	9	10	9	7	8	8	39	39	32.4	49.301	444	444;563;674	1	137	0	27.124	27	29.7	25.9	3245800000	272930000	318270000	166860000	4	6	4	51
O75368	O75368	8	8	8	553940000	495640000	445420000	SH3 domain-binding glutamic acid-rich-like protein	SH3BGRL		1	8	8	8	6	5	5	6	5	5	6	5	5	78.1	78.1	78.1	12.774	114	114	1	103	0	20.953	62.3	62.3	62.3	6699000000	608420000	584630000	326280000	6	6	5	69
O75369-8;O75369-2;O75369-9;O75369;O75369-6;O75369-3;E7EN95;O75369-7;O75369-5;O75369-4;H7C5L4;Q8WXT3	O75369-8;O75369-2;O75369-9;O75369;O75369-6;O75369-3;E7EN95;O75369-7;O75369-5;O75369-4	152;150;150;150;147;147;137;137;121;121;6;2	152;150;150;150;147;147;137;137;121;121;6;2	138;136;136;136;133;133;131;131;109;109;5;2	27512000000	28847000000	30084000000	Filamin-B	FLNB	;;;;;;;;;	12	152	152	138	141	140	141	141	140	141	128	126	127	77.2	77.2	73	281.63	2633	2633;2578;2591;2602;2537;2561;2409;2422;2146;2150;135;72	1	2741	0	323.31	72.9	71.2	71.2	361230000000	30743000000	33198000000	26968000000	161	170	161	1986
O75396	O75396	12	12	12	2214500000	2481300000	2409800000	Vesicle-trafficking protein SEC22b	SEC22B		1	12	12	12	11	11	12	11	11	12	11	11	12	51.6	51.6	51.6	24.593	215	215	1	243	0	323.31	51.6	51.6	51.6	29607000000	2499900000	2807100000	2259000000	9	11	12	137
O75400-2;O75400-3;O75400;F5H578;H0YG38;H7C2N3	O75400-2;O75400-3;O75400	12;12;12;4;2;1	12;12;12;4;2;1	12;12;12;4;2;1	215230000	254700000	266350000	Pre-mRNA-processing factor 40 homolog A	PRPF40A	;;	6	12	12	12	8	11	7	8	11	7	8	11	7	15.2	15.2	15.2	105.93	930	930;939;957;448;346;163	1	147	0	31.231	10.5	14.4	9.2	3242800000	180810000	296670000	196240000	3	6	3	48
O75436;F5H4L7;S4R3Q6;O75436-2;G3V1N8;S4R2Y3	O75436;F5H4L7;S4R3Q6;O75436-2;G3V1N8	16;15;12;12;9;1	16;15;12;12;9;1	14;13;11;11;7;1	1120300000	938790000	971390000	Vacuolar protein sorting-associated protein 26A	VPS26A	;;;;	6	16	16	14	14	15	15	14	15	15	12	13	13	56.9	56.9	52.6	38.169	327	327;310;226;251;216;63	1	238	0	167.97	54.1	54.4	56.6	13108000000	890340000	1049000000	796210000	9	9	14	130
O75438;O75438-2	O75438	3;1	3;1	3;1	71989000	0	0	NADH dehydrogenase [ubiquinone] 1 beta subcomplex subunit 1	NDUFB1		2	3	3	3	3	1	2	3	1	2	3	1	2	34.5	34.5	34.5	6.9611	58	58;105	1	23	0	5.6224	34.5	13.8	15.5	484390000	74993000	23974000	25357000	1	0	0	4
O75439;G3V0E4;E7ERZ4;F8WAZ6;F8WEA6;F8WBE1	O75439;G3V0E4;E7ERZ4	16;14;11;7;3;3	16;14;11;7;3;3	16;14;11;7;3;3	640110000	580910000	591500000	Mitochondrial-processing peptidase subunit beta	PMPCB	;;	6	16	16	16	14	12	14	14	12	14	14	12	14	42.9	42.9	42.9	54.366	489	489;490;403;202;119;122	1	243	0	142.62	39.1	33.1	39.3	7830300000	564350000	640680000	516210000	9	13	8	117
O75475;O75475-3;O75475-2	O75475;O75475-3;O75475-2	10;9;9	9;8;8	9;8;8	270830000	241790000	275460000	PC4 and SFRS1-interacting protein	PSIP1	;;	3	10	9	9	8	9	8	7	8	7	7	8	7	20.8	19.2	19.2	60.103	530	530;329;333	1	108	0	20.138	15.7	18.3	16.8	3431800000	264110000	342280000	250540000	7	9	3	58
O75477;B0QZ43	O75477;B0QZ43	10;7	7;4	7;4	119900000	121800000	98404000	Erlin-1	ERLIN1	;	2	10	7	7	8	8	7	5	5	4	5	5	4	32.9	24	24	38.925	346	346;275	1	57	0	12.351	26	24	19.9	1511900000	113670000	222610000	78358000	2	1	1	19
O75489;E9PS48;B4DFM8;E9PKL8;G3V194;E9PJE7	O75489	10;3;3;2;2;1	10;3;3;2;2;1	10;3;3;2;2;1	295400000	305800000	289990000	NADH dehydrogenase [ubiquinone] iron-sulfur protein 3, mitochondrial	NDUFS3		6	10	10	10	8	10	7	8	10	7	8	10	7	46.2	46.2	46.2	30.241	264	264;161;132;77;121;67	1	104	0	34.929	36.4	46.2	34.5	3955100000	510810000	364010000	340710000	4	6	5	49
O75506	O75506	2	2	2	85915000	104370000	142470000	Heat shock factor-binding protein 1	HSBP1		1	2	2	2	2	2	2	2	2	2	2	2	2	47.4	47.4	47.4	8.5435	76	76	1	19	0	15.668	47.4	47.4	47.4	964730000	96271000	115120000	124060000	1	3	2	16
O75521-2;O75521;F1LLU7;F8WAW4;C9JB63;F8W6J1;C9J000	O75521-2;O75521;F1LLU7;F8WAW4;C9JB63	7;7;5;4;4;2;2	7;7;5;4;4;2;2	7;7;5;4;4;2;2	207900000	201960000	213660000	Enoyl-CoA delta isomerase 2, mitochondrial	ECI2	;;;;	7	7	7	7	6	5	5	6	5	5	6	5	5	30.1	30.1	30.1	39.609	359	359;394;197;140;220;152;227	1	82	0	25.342	22.8	18.4	18.1	2400100000	251380000	245640000	171430000	4	2	4	42
O75530-3;O75530;O75530-2;E9PJK2	O75530-3;O75530;O75530-2	3;3;3;1	3;3;3;1	3;3;3;1	0	27820000	0	Polycomb protein EED	EED	;;	4	3	3	3	1	3	1	1	3	1	1	3	1	8.5	8.5	8.5	45.524	400	400;441;466;361	1	21	0	3.7805	3.5	8.5	3.5	196400000	13504000	38145000	16294000	0	2	0	6
O75531	O75531	6	6	6	495910000	428840000	657610000	Barrier-to-autointegration factor;Barrier-to-autointegration factor, N-terminally processed	BANF1		1	6	6	6	6	5	6	6	5	6	6	5	6	66.3	66.3	66.3	10.058	89	89	1	96	0	48.311	66.3	64	66.3	7472200000	470150000	497340000	488820000	3	3	2	38
O75533;H7C341;B4DGZ4;O75533-2;F8WC19	O75533	41;6;4;4;1	41;6;4;4;1	41;6;4;4;1	906300000	1029500000	1103000000	Splicing factor 3B subunit 1	SF3B1		5	41	41	41	29	33	29	29	33	29	29	33	29	45.7	45.7	45.7	145.83	1304	1304;241;154;144;37	1	437	0	323.31	30.4	34	32.7	12247000000	1013500000	1372100000	996830000	27	26	21	258
O75534-2;O75534;O75534-3;O75534-4;E9PLT0;E9PKN4;E9PLD4;E9PNG3	O75534-2;O75534;O75534-3;O75534-4;E9PLT0	18;18;18;18;15;2;2;2	18;18;18;18;15;2;2;2	18;18;18;18;15;2;2;2	230320000	267580000	224400000	Cold shock domain-containing protein E1	CSDE1	;;;;	8	18	18	18	10	13	11	10	13	11	10	13	11	29.2	29.2	29.2	85.746	767	767;798;813;844;668;46;94;136	1	157	0	45.27	17.5	21.4	18.5	3455500000	237880000	310310000	185440000	6	4	6	67
O75569-3;O75569-2;O75569;F8WEG8;G5E9Q4;C9JMM3;B4DJC7	O75569-3;O75569-2;O75569;F8WEG8;G5E9Q4;C9JMM3	5;5;5;3;3;3;2	5;5;5;3;3;3;2	5;5;5;3;3;3;2	25827000	30685000	0	Interferon-inducible double-stranded RNA-dependent protein kinase activator A	PRKRA	;;;;;	7	5	5	5	2	2	1	2	2	1	2	2	1	24.7	24.7	24.7	31.635	288	288;302;313;95;105;108;200	1	25	0	11.78	10.8	10.8	4.2	281720000	26782000	35600000	9702300	1	1	0	13
O75607	O75607	2	2	2	0	48694000	46349000	Nucleoplasmin-3	NPM3		1	2	2	2	1	2	2	1	2	2	1	2	2	20.8	20.8	20.8	19.343	178	178	1	22	0	35.796	11.8	20.8	20.8	541300000	25848000	54372000	38865000	0	0	1	7
O75608-2;O75608;E5RGR0;E5RJ48	O75608-2;O75608;E5RGR0	7;7;6;2	7;7;6;2	7;7;6;2	179620000	159240000	142840000	Acyl-protein thioesterase 1	LYPLA1	;;	4	7	7	7	4	6	6	4	6	6	4	6	6	61.2	61.2	61.2	22.875	214	214;230;197;90	1	81	0	82.799	37.9	54.7	49.1	2135500000	185490000	210220000	205050000	2	3	3	46
O75616;J3QT61;J3QSB2;J3QRV9;O75616-2	O75616;J3QT61;J3QSB2;J3QRV9;O75616-2	5;3;3;3;3	5;3;3;3;3	5;3;3;3;3	65675000	63456000	69986000	GTPase Era, mitochondrial	ERAL1	;;;;	5	5	5	5	3	4	3	3	4	3	3	4	3	14.9	14.9	14.9	48.349	437	437;171;276;284;276	1	44	0	9.0922	7.6	11.7	7.6	796480000	62615000	86043000	61514000	2	1	2	14
O75629	O75629	3	3	3	278780000	336240000	237890000	Protein CREG1	CREG1		1	3	3	3	3	1	2	3	1	2	3	1	2	24.5	24.5	24.5	24.074	220	220	1	72	0	127.5	24.5	9.5	15	3505900000	320150000	315460000	223060000	4	3	3	35
O75643;C9JAQ9;O75643-2;B4E0P5	O75643	54;16;16;14	54;16;16;14	54;16;16;14	1061400000	1255000000	1275600000	U5 small nuclear ribonucleoprotein 200 kDa helicase	SNRNP200		4	54	54	54	40	38	35	40	38	35	40	38	35	34.5	34.5	34.5	244.5	2136	2136;625;625;595	1	585	0	323.31	26.9	25.8	23.2	14507000000	1077100000	1423100000	985790000	24	29	19	332
O75663;O75663-2	O75663;O75663-2	14;10	14;10	14;10	346290000	345480000	306890000	TIP41-like protein	TIPRL	;	2	14	14	14	14	14	9	14	14	9	14	14	9	70.2	70.2	70.2	31.444	272	272;178	1	157	0	41.422	70.2	70.2	50.4	3611000000	379240000	529090000	222440000	10	8	6	67
O75694;E9PF10;O75694-2;D6RA13	O75694;E9PF10;O75694-2	32;31;31;1	32;31;31;1	32;31;31;1	747610000	779290000	749400000	Nuclear pore complex protein Nup155	NUP155	;;	4	32	32	32	27	24	23	27	24	23	27	24	23	33.9	33.9	33.9	155.2	1391	1391;1327;1332;54	1	362	0	252.44	28.1	25.4	23.9	9004700000	746460000	919960000	688820000	12	21	15	168
O75695	O75695	2	2	2	45744000	0	0	Protein XRP2	RP2		1	2	2	2	2	1	0	2	1	0	2	1	0	4.9	4.9	4.9	39.641	350	350	1	21	0.0044981	2.0655	4.9	2.3	0	400500000	47653000	30067000	0	0	0	0	1
O75717-2;O75717;F8W7P7;C9JYB3	O75717-2;O75717;F8W7P7	5;5;4;1	5;5;4;1	5;5;4;1	47780000	47491000	40038000	WD repeat and HMG-box DNA-binding protein 1	WDHD1	;;	4	5	5	5	4	5	4	4	5	4	4	5	4	6.3	6.3	6.3	112.7	1006	1006;1129;647;168	1	54	0	7.0001	4.5	6.3	4.9	468790000	38250000	65667000	25362000	2	2	2	16
O75718;C9JP16	O75718;C9JP16	15;13	15;13	15;13	668750000	595420000	702730000	Cartilage-associated protein	CRTAP	;	2	15	15	15	13	11	11	13	11	11	13	11	11	43.9	43.9	43.9	46.561	401	401;358	1	183	0	70.411	35.7	28.2	33.9	8866500000	804400000	778080000	643690000	11	5	6	98
O75746;O75746-2;F8W9J0;H0YFB2;B4DGK6	O75746;O75746-2	14;11;3;3;3	10;7;3;3;3	10;7;3;3;3	83622000	100060000	90829000	Calcium-binding mitochondrial carrier protein Aralar1	SLC25A12	;	5	14	10	10	9	10	11	7	7	8	7	7	8	27.6	21.2	21.2	74.761	678	678;571;87;175;210	1	92	0	21.948	18.4	20.4	23	1145000000	120820000	144300000	95268000	2	4	5	40
O75792	O75792	5	5	5	72021000	0	0	Ribonuclease H2 subunit A	RNASEH2A		1	5	5	5	5	5	3	5	5	3	5	5	3	22.4	22.4	22.4	33.395	299	299	1	47	0	4.483	22.4	22.4	12.7	662320000	69233000	80657000	41545000	1	0	0	7
O75815;O75815-3;O75815-2	O75815;O75815-3;O75815-2	4;3;2	4;3;2	4;3;2	30110000	24729000	0	Breast cancer anti-estrogen resistance protein 3	BCAR3	;;	3	4	4	4	3	2	2	3	2	2	3	2	2	6.3	6.3	6.3	92.565	825	825;734;501	1	21	0.0024679	2.5436	4.6	3.6	2.9	279900000	43612000	27442000	31546000	1	1	1	6
O75818-2;O75818;X6RLL4;F8WC38	O75818-2;O75818;X6RLL4	3;3;2;1	3;3;2;1	3;3;2;1	0	36617000	26370000	Ribonuclease P protein subunit p40	RPP40	;;	4	3	3	3	2	2	3	2	2	3	2	2	3	10.6	10.6	10.6	39.327	340	340;363;303;113	1	25	0	6.5872	6.5	6.5	10.6	222600000	9937000	29212000	31647000	1	2	0	11
O75821;K7EL20;K7ENA8;K7EP16	O75821;K7EL20;K7ENA8	15;12;12;7	15;12;12;7	6;3;6;3	873400000	960810000	1084400000	Eukaryotic translation initiation factor 3 subunit G	EIF3G	;;	4	15	15	6	11	12	12	11	12	12	4	5	5	49.7	49.7	21.9	35.611	320	320;262;289;118	1	190	0	117.62	43.8	44.1	44.1	12023000000	965240000	1016500000	735940000	8	10	8	130
O75822;O75822-3;O75822-2;H0YLP3;H0YGJ7	O75822;O75822-3;O75822-2	14;12;11;5;4	14;12;11;5;4	14;12;11;5;4	694420000	737360000	720830000	Eukaryotic translation initiation factor 3 subunit J	EIF3J	;;	5	14	14	14	12	12	11	12	12	11	12	12	11	53.5	53.5	53.5	29.062	258	258;209;204;117;106	1	171	0	80.901	50.8	50.4	48.8	8164700000	714420000	871500000	634700000	6	8	8	80
O75828	O75828	8	6	6	469100000	393300000	368430000	Carbonyl reductase [NADPH] 3	CBR3		1	8	6	6	7	8	6	5	6	4	5	6	4	36.1	25.6	25.6	30.85	277	277	1	73	0	35.965	29.6	36.1	26.7	5095100000	554570000	525710000	363290000	4	2	2	34
O75844	O75844	12	12	12	516600000	540570000	624320000	CAAX prenyl protease 1 homolog	ZMPSTE24		1	12	12	12	10	12	9	10	12	9	10	12	9	30.5	30.5	30.5	54.812	475	475	1	150	0	72.352	24.2	30.5	20.6	6601600000	635920000	761090000	537400000	6	11	6	76
O75874;C9J4N6;C9JLU6;C9JJE5	O75874	27;12;7;5	27;12;7;5	27;12;7;5	4773200000	4670300000	4953900000	Isocitrate dehydrogenase [NADP] cytoplasmic	IDH1		4	27	27	27	26	25	23	26	25	23	26	25	23	73.9	73.9	73.9	46.659	414	414;157;73;62	1	457	0	287.77	66.4	60.6	64.5	57697000000	5258200000	5457000000	4286600000	26	25	34	318
O75884-2;O75884	O75884-2;O75884	2;2	2;2	2;2	0	0	14343000	Putative hydrolase RBBP9	RBBP9	;	2	2	2	2	1	1	2	1	1	2	1	1	2	18.5	18.5	18.5	19.394	173	173;186	1	16	0.0002572	3.0126	9.8	9.8	18.5	151020000	14206000	12135000	12757000	1	0	0	4
O75915;F8WF90;C9JQU6;F8WF33	O75915;F8WF90;C9JQU6;F8WF33	4;2;2;2	4;2;2;2	4;2;2;2	312180000	317500000	346530000	PRA1 family protein 3	ARL6IP5	;;;	4	4	4	4	4	3	3	4	3	3	4	3	3	24.5	24.5	24.5	21.614	188	188;59;88;93	1	68	0	59.166	24.5	20.7	20.7	3649200000	414960000	304400000	294060000	5	5	3	50
O75934	O75934	7	7	7	201030000	252050000	231460000	Pre-mRNA-splicing factor SPF27	BCAS2		1	7	7	7	6	6	6	6	6	6	6	6	6	48	48	48	26.131	225	225	1	82	0	34.506	44	44	44	2721500000	188140000	243260000	204000000	3	2	4	39
O75937;S4R3J5	O75937	12;2	12;2	12;2	543430000	737290000	893840000	DnaJ homolog subfamily C member 8	DNAJC8		2	12	12	12	9	12	10	9	12	10	9	12	10	55.7	55.7	55.7	29.841	253	253;106	1	178	0	158.17	37.9	55.7	52.6	8948300000	543350000	788960000	689270000	6	7	11	101
O75940	O75940	2	2	2	48855000	59833000	0	Survival of motor neuron-related-splicing factor 30	SMNDC1		1	2	2	2	2	2	1	2	2	1	2	2	1	20.2	20.2	20.2	26.711	238	238	1	21	0.00027137	3.7423	20.2	20.2	11.3	388470000	45482000	60043000	23326000	2	2	1	11
O75947;O75947-2;F5H608	O75947;O75947-2;F5H608	12;10;6	12;10;6	12;10;6	953280000	1049000000	976200000	ATP synthase subunit d, mitochondrial	ATP5H	;;	3	12	12	12	9	10	10	9	10	10	9	10	10	83.2	83.2	83.2	18.491	161	161;137;81	1	151	0	67.915	68.9	77	70.8	11973000000	1095400000	1349100000	863360000	6	10	9	102
O75955;B4DVY7;A2AB09;A2AB12;A2AB10;A2AB13;A2AB11;A2ABJ5	O75955;B4DVY7;A2AB09;A2AB12;A2AB10	9;8;6;5;5;4;4;1	9;8;6;5;5;4;4;1	9;8;6;5;5;4;4;1	186780000	193100000	208580000	Flotillin-1	FLOT1	;;;;	8	9	9	9	7	9	8	7	9	8	7	9	8	28.3	28.3	28.3	47.355	427	427;379;238;235;252;185;192;145	1	118	0	41.709	22	28.3	26	2413300000	157660000	240560000	189930000	2	4	2	43
O75962-2;O75962;O75962-5;O75962-4;E7EWP2;E7EPJ7;F5H228;O75962-3	O75962-2;O75962;O75962-5;O75962-4;E7EWP2;E7EPJ7;F5H228	8;8;7;7;6;6;4;1	8;8;7;7;6;6;4;1	8;8;7;7;6;6;4;1	145780000	135510000	117120000	Triple functional domain protein	TRIO	;;;;;;	8	8	8	8	6	6	3	6	6	3	6	6	3	3	3	3	329.39	2921	2921;3097;2563;3038;2309;2546;1508;596	1	66	0	11.103	2.2	2.2	1.2	1668400000	138360000	161240000	190180000	2	2	3	29
O75964;E9PN17	O75964;E9PN17	6;5	6;5	6;5	671190000	633180000	481580000	ATP synthase subunit g, mitochondrial	ATP5L	;	2	6	6	6	6	6	5	6	6	5	6	6	5	52.4	52.4	52.4	11.428	103	103;76	1	99	0	38.994	52.4	52.4	45.6	7825200000	619830000	806680000	359270000	4	8	3	56
O75976-2;O75976;J3QRJ9;J3QQJ4	O75976-2;O75976	4;4;1;1	4;4;1;1	4;4;1;1	26009000	24529000	22387000	Carboxypeptidase D	CPD	;	4	4	4	4	3	4	2	3	4	2	3	4	2	4.1	4.1	4.1	126.49	1133	1133;1380;82;184	1	28	0	5.9916	2.8	4.1	1.8	245350000	33749000	30463000	14160000	1	2	0	10
O76003	O76003	16	16	16	1450600000	1351400000	1466600000	Glutaredoxin-3	GLRX3		1	16	16	16	11	15	16	11	15	16	11	15	16	54.9	54.9	54.9	37.432	335	335	1	228	0	250.62	45.1	52.8	54.9	17229000000	1657400000	1727200000	1200400000	10	13	14	135
O76031;H0YM48;H0YK07	O76031	14;3;2	14;3;2	14;3;2	164160000	170570000	214100000	ATP-dependent Clp protease ATP-binding subunit clpX-like, mitochondrial	CLPX		3	14	14	14	9	11	10	9	11	10	9	11	10	33.2	33.2	33.2	69.223	633	633;268;130	1	138	0	30.139	20.1	24.2	21.8	2496300000	231100000	256020000	177010000	5	2	2	46
O76070;F8W754	O76070	5;1	5;1	5;1	0	0	74885000	Gamma-synuclein	SNCG		2	5	5	5	1	1	4	1	1	4	1	1	4	42.5	42.5	42.5	13.331	127	127;126	1	40	0	12.382	10.2	10.2	40.9	833350000	16741000	20826000	298350000	0	0	1	7
O76071	O76071	9	9	9	148780000	133490000	123980000	Probable cytosolic iron-sulfur protein assembly protein CIAO1	CIAO1		1	9	9	9	7	7	6	7	7	6	7	7	6	38.6	38.6	38.6	37.84	339	339	1	91	0	17.461	30.7	30.7	26.3	1698400000	148950000	168220000	109270000	5	3	1	38
O76094;O76094-2;D6RDY6;R4GNC1	O76094;O76094-2	26;24;12;9	26;24;12;9	26;24;12;9	902780000	874840000	877380000	Signal recognition particle subunit SRP72	SRP72	;	4	26	26	26	24	22	19	24	22	19	24	22	19	51.6	51.6	51.6	74.605	671	671;610;357;220	1	287	0	242.12	48.1	42.3	34	10699000000	1136300000	1101700000	774380000	13	9	13	138
O94760;B4DYP1;B4DGT0;O94760-2	O94760;B4DYP1;B4DGT0;O94760-2	10;6;6;6	10;6;6;6	9;5;5;5	293450000	248600000	232680000	N(G),N(G)-dimethylarginine dimethylaminohydrolase 1	DDAH1	;;;	4	10	10	9	6	5	8	6	5	8	5	4	7	41.1	41.1	38.2	31.121	285	285;185;192;182	1	106	0	20.593	21.1	17.2	34.4	3094500000	376840000	307840000	186580000	4	4	4	52
O94766;G3V150;B7ZAB3;E9PNA1;Q9NPZ5	O94766;G3V150;B7ZAB3	5;4;4;2;1	5;4;4;2;1	5;4;4;2;1	0	45175000	38699000	Galactosylgalactosylxylosylprotein 3-beta-glucuronosyltransferase 3	B3GAT3	;;	5	5	5	5	1	4	3	1	4	3	1	4	3	21.5	21.5	21.5	37.121	335	335;319;315;223;323	1	32	0	9.809	4.2	18.8	14.9	424060000	15305000	76915000	39599000	0	3	2	19
O94776;O94776-2	O94776;O94776-2	17;9	17;9	17;9	497300000	559580000	529300000	Metastasis-associated protein MTA2	MTA2	;	2	17	17	17	16	15	14	16	15	14	16	15	14	33.5	33.5	33.5	75.022	668	668;495	1	189	0	58.807	30.5	29.2	25.9	5970700000	549360000	589120000	466200000	9	8	7	101
O94808;E5RJP4	O94808	12;5	5;2	5;2	0	29256000	28452000	Glutamine--fructose-6-phosphate aminotransferase [isomerizing] 2	GFPT2		2	12	5	5	6	8	6	1	2	2	1	2	2	25.4	12.2	12.2	76.93	682	682;216	1	25	0	10.292	9.7	14.4	12.9	236410000	19028000	29687000	21951000	1	1	2	11
O94826	O94826	24	24	24	709300000	773080000	803520000	Mitochondrial import receptor subunit TOM70	TOMM70A		1	24	24	24	18	17	17	18	17	17	18	17	17	56.9	56.9	56.9	67.454	608	608	1	273	0	108.81	40	40.8	38.2	8759000000	735980000	865630000	717310000	6	10	11	134
O94829	O94829	1	1	1	0	0	9804500	Importin-13	IPO13		1	1	1	1	1	1	1	1	1	1	1	1	1	1.3	1.3	1.3	108.19	963	963	1	13	0.0074108	1.8636	1.3	1.3	1.3	86443000	8985800	11081000	8720300	0	1	1	6
[truncated: 2,896 more rows]
